# Supplementary material for: Akkermansia muciniphila Enhances Resistance to Infectious Bronchitis Virus in Chickens Through γ-Aminobutyric Acid-Mediated Anti-Inflammatory Pathways
Source: Research Square preprint supplement (doi:10.21203/rs.3.rs-6786224/v1), 2025-06-25
Supplement: Supplementary file 1 [file 283defb8ec8bdf94faaeed4e.xlsx]

## Sheet: Sheet1
Table S10. Taxonomic classification of 16S rRNA gene amplicons from young chickens before infection and at 3, 5, and 7 days post-infection (dpi).
otuId	Taxonomy	P0dpi1	P0dpi2	P0dpi3	P0dpi4	P0dpi5	P0dpi6	P0dpi7	P0dpi8	P0dpi9	P0dpi10	P3dpi1	P3dpi2	P3dpi3	P3dpi4	P3dpi5	P3dpi6	P3dpi7	P3dpi8	P3dpi9	P3dpi10	P5dpi1	P5dpi2	P5dpi3	P5dpi4	P5dpi5	P5dpi6	P5dpi7	P5dpi8	P5dpi9	P5dpi10	P7dpi1	P7dpi2	P7dpi3	P7dpi4	P7dpi5	P7dpi6	P7dpi7	P7dpi8	P7dpi9	P7dpi10
OTU1	Primary:Bacteria;Phylum:Bacillota;Class:Clostridia;Order:Eubacteriales;Family:Lachnospiraceae;Genus:Mediterraneibacter;Species:Mediterraneibacter_hominis;	2652	2763	2212	3359	3555	1715	4903	2919	2780	4438	1881	1629	4915	5448	3908	1085	5956	2654	4045	1957	5322	1707	5339	2096	4132	2239	4396	4012	1851	2293	4315	2127	5128	5589	753	2517	2744	4212	467	1508
OTU10	Primary:Bacteria;Phylum:Bacillota;Class:Negativicutes;Order:Veillonellales;Family:Veillonellaceae;Genus:Megasphaera;Species:Megasphaera_stantonii;	1456	635	323	19	699	3	39	159	97	99	40	99	51	79	477	1	27	130	113	1571	85	18	402	36	41	74	100	771	53	221	300	791	254	92	496	108	539	246	390	312
OTU100	Primary:Bacteria;Phylum:Bacillota;Class:Erysipelotrichia;Order:Erysipelotrichales;Family:Erysipelotrichaceae;Genus:Massilimicrobiota;Species:Massilimicrobiota_timonensis;	108	49	24	62	65	7	32	64	22	47	17	30	40	30	20	24	23	34	81	29	21	23	61	21	23	8	32	31	25	59	25	13	72	17	12	18	27	20	20	25
OTU1001	Primary:Bacteria;Phylum:Bacillota;Class:Clostridia;Order:Eubacteriales;Family:Oscillospiraceae;Genus:Flintibacter;Species:Flintibacter_butyricus;	4	12	5	5	1	6	2	6	1	5	2	3	3	2	0	2	1	0	1	5	1	0	0	2	0	0	0	2	0	0	0	0	2	1	1	0	3	3	6	2
OTU1002	Primary:Bacteria;Phylum:Bacillota;Class:Clostridia;Order:Eubacteriales;Family:Lachnospiraceae;Genus:NA;Species:NA;	3	2	10	10	3	9	5	7	5	4	11	37	3	5	2	6	11	7	12	1	18	14	7	4	6	27	10	1	5	4	3	4	10	16	0	6	4	3	0	11
OTU1003	Primary:Bacteria;Phylum:NA;Class:NA;Order:NA;Family:NA;Genus:NA;Species:NA;	3	6	0	1	0	1	0	0	6	2	0	3	0	0	2	0	0	1	0	0	0	0	6	1	0	0	0	0	0	0	0	0	0	0	9	0	1	0	0	0
OTU1004	Primary:Bacteria;Phylum:Bacteroidota;Class:Bacteroidia;Order:Bacteroidales;Family:Rikenellaceae;Genus:Gallalistipes;Species:Gallalistipes_aquisgranensis;	3	2	0	0	0	0	0	0	0	0	0	0	0	0	1	0	0	0	0	2	0	0	0	0	0	1	0	0	0	0	0	0	0	0	0	0	0	0	1	0
OTU1007	Primary:Bacteria;Phylum:Bacillota;Class:Clostridia;Order:Eubacteriales;Family:NA;Genus:NA;Species:NA;	0	2	1	2	0	0	1	0	1	1	1	0	0	0	0	0	0	2	0	0	0	0	0	0	1	0	0	0	0	0	1	0	0	1	0	0	0	3	0	0
OTU1008	Primary:Bacteria;Phylum:Bacillota;Class:Clostridia;Order:Eubacteriales;Family:Lachnospiraceae;Genus:Laedolimicola;Species:Laedolimicola_ammoniilytica;	1	7	13	7	2	1	1	10	0	6	3	7	6	0	0	4	0	3	0	0	0	3	1	0	0	10	2	2	0	2	1	4	0	2	0	15	18	0	1	1
OTU1009	Primary:Bacteria;Phylum:Bacteroidota;Class:Bacteroidia;Order:Bacteroidales;Family:Rikenellaceae;Genus:Millionella;Species:Millionella_massiliensis;	0	0	0	3	0	0	0	0	0	0	0	1	0	0	0	0	0	0	0	0	0	0	0	0	0	0	0	1	0	0	0	0	0	1	0	0	0	0	3	0
OTU101	Primary:Bacteria;Phylum:NA;Class:NA;Order:NA;Family:NA;Genus:NA;Species:NA;	228	160	0	1	237	17	11	45	7	15	1	1	3	2	51	0	2	6	0	227	3	9	212	1	16	12	0	8	1	1	9	0	9	0	38	1	4	6	1359	6
OTU1012	Primary:Bacteria;Phylum:Bacillota;Class:Clostridia;Order:Eubacteriales;Family:Oscillospiraceae;Genus:Hydrogenoanaerobacterium;Species:Hydrogenoanaerobacterium_saccharovorans;	0	0	0	0	1	1	1	0	1	0	1	0	0	0	0	1	0	0	0	0	0	1	0	0	0	0	0	0	0	0	0	0	0	0	0	0	0	1	0	0
OTU1015	Primary:Bacteria;Phylum:Pseudomonadota;Class:Gammaproteobacteria;Order:Enterobacterales;Family:Morganellaceae;Genus:Arsenophonus;Species:Arsenophonus_nasoniae;	0	0	0	0	0	0	0	0	0	0	0	0	0	0	0	0	0	0	0	0	0	0	0	0	0	0	0	0	0	0	0	0	0	0	0	0	0	0	0	0
OTU1016	Primary:Bacteria;Phylum:Pseudomonadota;Class:Gammaproteobacteria;Order:NA;Family:NA;Genus:NA;Species:NA;	0	0	0	0	0	0	0	0	0	0	0	0	0	0	0	0	0	0	0	0	0	0	0	0	0	0	0	0	0	0	0	0	0	0	0	0	0	0	0	0
OTU102	Primary:Bacteria;Phylum:Bacteroidota;Class:Bacteroidia;Order:Bacteroidales;Family:Prevotellaceae;Genus:NA;Species:NA;	2	0	0	2	36	3	102	3	483	90	24	54	20	45	1	0	3	0	1	17	145	3	140	5	1	4	1	0	9	3	6	31	6	0	141	3	1	2	7	66
OTU1020	Primary:Bacteria;Phylum:Pseudomonadota;Class:Alphaproteobacteria;Order:Rhodospirillales;Family:NA;Genus:NA;Species:NA;	0	0	0	0	0	0	0	0	0	0	0	0	0	0	0	0	0	0	0	0	0	0	0	0	0	0	0	0	0	0	0	0	0	0	0	0	0	0	0	0
OTU1022	Primary:Bacteria;Phylum:Bacillota;Class:Clostridia;Order:Eubacteriales;Family:Lachnospiraceae;Genus:NA;Species:NA;	1	1	0	0	1	0	1	1	4	0	0	0	0	0	0	0	2	0	0	1	0	0	0	0	0	0	0	0	1	0	0	0	0	0	0	0	0	0	1	0
OTU1023	Primary:Bacteria;Phylum:Bacillota;Class:Clostridia;Order:Eubacteriales;Family:Lachnospiraceae;Genus:NA;Species:NA;	2	0	0	0	0	1	0	1	1	0	0	0	0	2	0	0	0	1	0	0	1	0	0	0	0	1	0	0	0	0	2	2	1	0	0	1	1	0	0	1
OTU1025	Primary:Bacteria;Phylum:Bacillota;Class:Clostridia;Order:Eubacteriales;Family:Oscillospiraceae;Genus:Ligaoa;Species:Ligaoa_zhengdingensis;	0	1	0	0	1	1	0	0	0	0	0	0	1	0	0	0	0	0	0	0	0	0	1	0	0	1	0	0	0	0	0	0	0	0	3	0	1	0	0	0
OTU1026	Primary:Bacteria;Phylum:Bacillota;Class:Clostridia;Order:Eubacteriales;Family:Oscillospiraceae;Genus:NA;Species:NA;	0	0	0	0	0	0	0	1	0	0	0	0	0	0	0	0	0	0	0	2	0	0	0	0	0	1	0	0	0	0	0	1	0	0	0	0	0	0	0	0
OTU103	Primary:Bacteria;Phylum:Deferribacterota;Class:Deferribacteres;Order:Deferribacterales;Family:Deferribacteraceae;Genus:Mucispirillum;Species:Mucispirillum_schaedleri;	72	130	2	25	71	8	5	62	35	19	1	19	1	0	40	0	0	5	0	116	0	3	168	1	12	1	9	62	21	6	4	1	2	2	715	5	6	1	1035	6
OTU1033	Primary:Bacteria;Phylum:Bacillota;Class:Clostridia;Order:Eubacteriales;Family:Oscillospiraceae;Genus:NA;Species:NA;	6	11	30	2	5	0	0	9	4	2	0	8	9	3	20	4	1	8	7	31	0	1	7	0	0	0	0	18	0	0	1	0	3	0	7	0	7	4	6	2
OTU104	Primary:Bacteria;Phylum:NA;Class:NA;Order:NA;Family:NA;Genus:NA;Species:NA;	10	8	1	65	41	29	12	13	12	9	49	0	23	0	3	27	5	51	0	1	14	55	25	74	115	44	18	4	83	112	29	26	31	45	16	89	45	23	2	26
OTU1041	Primary:Bacteria;Phylum:Bacillota;Class:Clostridia;Order:Eubacteriales;Family:NA;Genus:NA;Species:NA;	31	31	5	66	8	19	19	7	9	10	12	12	7	19	6	22	22	30	3	6	31	42	23	43	22	14	16	1	30	3	15	24	10	26	2	20	16	33	2	13
OTU1042	Primary:Bacteria;Phylum:Bacillota;Class:Clostridia;Order:Eubacteriales;Family:Oscillospiraceae;Genus:Hominimerdicola;Species:Hominimerdicola_aceti;	0	0	0	0	0	0	0	0	0	0	0	0	0	0	0	0	0	0	0	0	0	0	0	0	0	0	0	0	0	0	0	0	0	0	0	0	0	0	0	0
OTU1043	Primary:Bacteria;Phylum:Bacillota;Class:Clostridia;Order:Eubacteriales;Family:NA;Genus:NA;Species:NA;	0	4	0	0	1	1	0	4	1	0	0	0	0	0	1	0	0	1	0	0	0	0	1	1	0	0	0	1	0	0	0	0	0	0	0	1	0	0	0	0
OTU1044	Primary:Bacteria;Phylum:Bacillota;Class:Bacilli;Order:Lactobacillales;Family:Lactobacillaceae;Genus:Limosilactobacillus;Species:Limosilactobacillus_mucosae;	0	1	0	0	1	0	0	0	0	1	0	0	0	0	0	0	0	0	1	0	0	0	0	0	1	0	0	0	0	0	3	0	0	0	0	0	0	0	0	0
OTU105	Primary:Bacteria;Phylum:Bacillota;Class:Clostridia;Order:Eubacteriales;Family:NA;Genus:NA;Species:NA;	87	19	269	215	75	137	40	101	134	171	165	498	38	250	46	75	124	31	1	66	286	701	449	88	293	42	242	16	897	54	50	167	126	61	12	73	45	115	14	1418
OTU106	Primary:Bacteria;Phylum:Bacillota;Class:Bacilli;Order:Lactobacillales;Family:Enterococcaceae;Genus:Enterococcus;Species:Enterococcus_cecorum;	39	63	39	25	78	2	30	38	13	80	107	43	22	36	30	87	49	97	28	36	31	29	123	1	32	79	17	3	19	30	3	4	5	9	3	12	6	9	6	4
OTU1060	Primary:Bacteria;Phylum:Bacillota;Class:Clostridia;Order:Eubacteriales;Family:Lachnospiraceae;Genus:NA;Species:NA;	3	5	1	3	0	1	2	0	2	5	0	1	0	1	2	0	0	2	0	0	0	1	0	0	3	0	0	0	1	0	0	0	0	0	0	0	0	1	2	0
OTU1065	Primary:Bacteria;Phylum:Bacteroidota;Class:Bacteroidia;Order:Bacteroidales;Family:Bacteroidaceae;Genus:Bacteroides;Species:Bacteroides_uniformis;	0	2	0	1	2	1	1	0	0	0	0	0	2	0	1	0	0	0	0	1	0	1	3	1	0	0	0	4	0	0	0	0	0	0	0	0	0	0	6	0
OTU1066	Primary:Bacteria;Phylum:Bacteroidota;Class:Bacteroidia;Order:Bacteroidales;Family:Bacteroidaceae;Genus:Bacteroides;Species:NA;	0	0	0	0	0	0	0	0	0	0	0	0	0	0	0	0	0	0	0	0	0	0	0	0	0	0	0	0	0	0	0	0	0	0	0	0	0	0	0	0
OTU1068	Primary:Bacteria;Phylum:Bacillota;Class:Clostridia;Order:Eubacteriales;Family:Lachnospiraceae;Genus:Agathobacter;Species:Agathobacter_rectalis;	3	2	15	15	3	13	13	2	4	12	4	2	2	7	0	0	1	6	10	8	3	1	0	0	0	0	9	1	0	2	0	0	0	0	0	1	0	0	0	1
OTU107	Primary:Bacteria;Phylum:Bacillota;Class:Clostridia;Order:Eubacteriales;Family:NA;Genus:NA;Species:NA;	10	33	0	5	11	0	22	30	63	22	26	37	1	11	3	13	6	47	6	3	41	10	8	38	7	6	4	11	16	44	65	52	122	21	14	12	33	20	12	106
OTU1074	Primary:Bacteria;Phylum:Bacillota;Class:Clostridia;Order:Eubacteriales;Family:Oscillospiraceae;Genus:NA;Species:NA;	5	19	31	0	14	1	3	49	6	13	12	1	10	16	4	25	0	3	7	25	0	1	17	2	0	3	4	8	1	0	2	14	8	0	35	4	249	32	52	35
OTU1077	Primary:Bacteria;Phylum:Spirochaetota;Class:Spirochaetia;Order:Spirochaetales;Family:Treponemataceae;Genus:Treponema;Species:Treponema_porcinum;	0	0	0	0	0	0	0	0	0	0	0	0	0	0	0	0	0	0	0	0	0	0	0	0	0	0	0	0	0	0	0	0	0	0	0	0	0	0	0	0
OTU1078	Primary:Bacteria;Phylum:NA;Class:NA;Order:NA;Family:NA;Genus:NA;Species:NA;	1	0	0	0	0	1	0	6	1	0	0	0	0	0	1	0	0	0	0	0	0	0	1	0	0	0	0	6	0	0	0	0	0	0	2	0	1	0	0	0
OTU1079	Primary:Bacteria;Phylum:Bacteroidota;Class:Bacteroidia;Order:Bacteroidales;Family:Prevotellaceae;Genus:Prevotellamassilia;Species:Prevotellamassilia_timonensis;	0	0	0	0	0	0	0	0	0	0	0	0	0	0	0	0	0	0	0	0	0	0	0	0	0	0	0	0	0	0	0	0	0	0	0	0	0	0	0	0
OTU108	Primary:Bacteria;Phylum:Bacteroidota;Class:Bacteroidia;Order:Bacteroidales;Family:Porphyromonadaceae;Genus:Parabacteroides;Species:NA;	76	151	0	10	19	35	4	400	42	14	1	8	60	1	147	4	0	5	2	597	0	3	43	4	3	15	1	125	12	2	1	1	0	2	114	0	3	0	39	1
OTU1082	Primary:Bacteria;Phylum:Bacillota;Class:Clostridia;Order:Eubacteriales;Family:NA;Genus:NA;Species:NA;	13	1	31	6	35	4	44	1	11	11	10	411	48	0	4	4	80	18	3	0	63	88	5	10	14	97	1	7	5	2	22	5	3	27	0	4	2	5	6	5
OTU1087	Primary:Bacteria;Phylum:Bacillota;Class:Clostridia;Order:Eubacteriales;Family:Oscillospiraceae;Genus:NA;Species:NA;	4	0	1	2	1	2	5	3	6	5	7	5	0	5	6	0	7	4	2	1	2	7	4	7	1	2	2	0	3	4	5	8	5	0	1	7	5	2	1	2
OTU1089	Primary:Bacteria;Phylum:Bacillota;Class:Clostridia;Order:Eubacteriales;Family:NA;Genus:NA;Species:NA;	27	6	73	146	70	122	37	18	61	42	217	126	57	127	25	11	19	71	76	6	91	67	44	34	146	56	13	5	95	24	25	39	61	21	5	67	40	102	8	21
OTU109	Primary:Bacteria;Phylum:Bacillota;Class:Clostridia;Order:Eubacteriales;Family:Lachnospiraceae;Genus:Anaerobutyricum;Species:Anaerobutyricum_hallii;	34	25	30	13	11	22	39	20	12	10	34	85	101	17	39	20	10	36	18	16	50	121	48	38	38	9	6	17	15	6	40	40	115	28	11	49	22	75	7	39
OTU1093	Primary:Bacteria;Phylum:Bacillota;Class:Clostridia;Order:Eubacteriales;Family:NA;Genus:NA;Species:NA;	5	5	33	7	8	3	7	4	24	21	5	0	5	0	8	17	3	2	0	1	13	14	20	13	42	5	15	3	36	4	30	4	2	6	2	4	0	9	0	18
OTU1096	Primary:Bacteria;Phylum:Bacillota;Class:Clostridia;Order:Eubacteriales;Family:Oscillospiraceae;Genus:NA;Species:NA;	0	1	0	0	0	0	0	0	0	0	0	0	1	0	0	2	0	0	0	0	0	0	0	1	0	0	0	0	0	1	0	0	0	0	4	0	0	0	1	0
OTU1097	Primary:Bacteria;Phylum:Bacillota;Class:Clostridia;Order:Eubacteriales;Family:NA;Genus:NA;Species:NA;	0	0	0	0	1	0	0	0	0	1	0	0	0	0	0	0	1	0	0	0	0	0	0	0	0	0	0	0	0	2	0	0	1	0	1	0	0	0	0	0
OTU11	Primary:Bacteria;Phylum:Bacillota;Class:Clostridia;Order:Eubacteriales;Family:Lachnospiraceae;Genus:Laedolimicola;Species:Laedolimicola_ammoniilytica;	141	294	703	318	344	407	361	424	679	423	994	1536	707	401	265	314	365	610	965	218	359	1100	240	324	473	1377	900	231	1658	877	696	595	407	373	96	1331	1592	952	160	830
OTU110	Primary:Bacteria;Phylum:Bacillota;Class:Clostridia;Order:Eubacteriales;Family:Lachnospiraceae;Genus:NA;Species:NA;	7	14	25	65	5	14	38	26	30	10	49	52	9	6	6	23	60	12	13	9	56	81	20	45	22	47	76	10	94	25	23	57	131	33	9	34	37	22	4	16
OTU1103	Primary:Bacteria;Phylum:Bacillota;Class:Clostridia;Order:Eubacteriales;Family:Oscillospiraceae;Genus:NA;Species:NA;	1	2	6	6	2	0	3	5	3	6	10	6	5	1	5	12	3	3	3	0	1	0	2	1	0	0	9	2	2	2	12	6	4	5	3	6	7	13	0	6
OTU1106	Primary:Bacteria;Phylum:Bacteroidota;Class:Bacteroidia;Order:Bacteroidales;Family:Bacteroidaceae;Genus:Phocaeicola;Species:NA;	0	0	0	0	0	0	0	1	0	6	0	4	0	0	3	0	0	0	2	0	0	0	3	10	2	1	0	0	0	3	11	3	4	0	570	5	18	2	589	0
OTU1107	Primary:Bacteria;Phylum:Bacillota;Class:Clostridia;Order:Eubacteriales;Family:Lachnospiraceae;Genus:Kineothrix;Species:Kineothrix_alysoides;	14	1	1	1	1	4	2	1	6	0	1	0	0	5	0	3	1	0	1	1	0	1	0	1	0	1	0	0	0	4	0	0	0	0	0	1	0	0	1	0
OTU1108	Primary:Bacteria;Phylum:Bacillota;Class:Clostridia;Order:Eubacteriales;Family:Lachnospiraceae;Genus:Anaerotignum;Species:Anaerotignum_lactatifermentans;	3	3	4	0	5	1	1	3	0	1	2	5	1	2	0	3	0	2	1	0	0	0	0	1	1	1	2	0	0	1	1	4	4	1	1	0	5	12	0	6
OTU111	Primary:Bacteria;Phylum:Bacteroidota;Class:Bacteroidia;Order:Bacteroidales;Family:Bacteroidaceae;Genus:NA;Species:NA;	0	5	0	2	0	4	0	0	18	0	1	34	2	8	57	1	0	1	2	1117	2	4	12	0	3	3	2	337	0	18	1	0	1	0	9	2	2	0	22	0
OTU1110	Primary:Bacteria;Phylum:Bacillota;Class:Clostridia;Order:Eubacteriales;Family:Oscillospiraceae;Genus:NA;Species:NA;	1	4	2	3	1	2	3	1	2	5	3	2	0	3	0	5	1	2	1	0	11	3	0	2	1	0	6	0	1	1	8	0	6	4	7	5	3	4	0	2
OTU1113	Primary:Bacteria;Phylum:Bacillota;Class:Clostridia;Order:Eubacteriales;Family:NA;Genus:NA;Species:NA;	0	0	0	0	0	0	0	0	0	0	0	0	0	0	0	0	0	0	0	0	0	0	0	0	0	0	0	0	0	0	0	0	0	0	0	0	0	0	0	0
OTU1115	Primary:Archaea;Phylum:Euryarchaeota;Class:Methanomicrobia;Order:Methanomicrobiales;Family:Methanocorpusculaceae;Genus:Methanocorpusculum;Species:Methanocorpusculum_sinense;	2	0	0	0	0	0	0	0	0	0	0	0	0	0	0	0	0	0	0	1	0	0	1	0	0	0	0	0	0	0	0	0	0	0	1	0	0	0	0	0
OTU1117	Primary:Bacteria;Phylum:Bacillota;Class:Clostridia;Order:Eubacteriales;Family:NA;Genus:NA;Species:NA;	161	131	178	294	226	516	246	95	555	78	209	243	86	116	71	126	271	507	126	43	175	550	233	427	241	231	188	56	449	203	189	266	415	628	90	273	118	459	32	906
OTU1118	Primary:Bacteria;Phylum:Bacillota;Class:Clostridia;Order:Eubacteriales;Family:Lachnospiraceae;Genus:Schaedlerella;Species:Schaedlerella_arabinosiphila;	0	3	2	0	0	3	2	1	1	3	0	1	0	1	1	0	1	0	0	1	3	0	0	0	0	0	0	0	0	0	0	0	0	0	0	1	0	0	0	0
OTU112	Primary:Bacteria;Phylum:Bacillota;Class:Clostridia;Order:Eubacteriales;Family:Oscillospiraceae;Genus:NA;Species:NA;	34	14	149	5	18	1	41	21	53	22	126	47	113	82	27	85	34	50	18	8	13	30	34	2	1	69	69	4	4	2	49	65	65	9	34	75	82	57	4	44
OTU1124	Primary:Bacteria;Phylum:Bacillota;Class:Clostridia;Order:Eubacteriales;Family:NA;Genus:NA;Species:NA;	0	0	1	3	1	1	0	1	2	0	1	0	2	0	1	1	0	5	2	0	0	5	1	1	2	1	4	0	0	0	5	5	2	2	0	1	6	1	0	8
OTU1126	Primary:Bacteria;Phylum:Bacillota;Class:Clostridia;Order:Eubacteriales;Family:Oscillospiraceae;Genus:NA;Species:NA;	14	14	29	37	17	50	35	27	34	7	45	22	9	24	14	56	12	54	5	2	36	23	7	15	55	4	15	3	6	27	56	59	26	38	10	24	33	69	3	37
OTU1127	Primary:Bacteria;Phylum:Bacillota;Class:Erysipelotrichia;Order:Erysipelotrichales;Family:Erysipelotrichaceae;Genus:NA;Species:NA;	54	0	18	10	2	52	0	2	12	6	18	10	15	27	0	37	5	28	0	0	17	2	5	4	9	1	6	2	19	19	10	16	11	20	2	1	2	0	0	9
OTU1128	Primary:Bacteria;Phylum:Bacillota;Class:Clostridia;Order:Eubacteriales;Family:Oscillospiraceae;Genus:Butyricicoccus;Species:Butyricicoccus_intestinisimiae;	0	0	0	0	0	0	0	0	0	0	0	0	0	0	0	0	0	0	0	0	0	0	0	0	0	0	0	0	0	0	0	0	0	0	0	0	0	0	0	0
OTU113	Primary:Bacteria;Phylum:Bacteroidota;Class:Bacteroidia;Order:Bacteroidales;Family:Bacteroidaceae;Genus:Phocaeicola;Species:Phocaeicola_caecigallinarum;	0	0	0	0	0	0	0	0	0	14	0	5	0	0	0	0	0	0	5	1	0	1	4	23	3	6	0	0	0	1	12	2	8	2	700	7	35	0	561	0
OTU1130	Primary:Bacteria;Phylum:Bacillota;Class:Clostridia;Order:Eubacteriales;Family:Lachnospiraceae;Genus:Coprococcus;Species:Coprococcus_comes;	4	1	1	0	1	2	2	1	2	0	0	1	0	1	1	3	0	4	0	1	3	0	0	0	0	0	0	0	0	0	0	1	1	0	0	0	0	0	0	1
OTU1134	Primary:Bacteria;Phylum:Bacillota;Class:Clostridia;Order:Eubacteriales;Family:Lachnospiraceae;Genus:NA;Species:NA;	10	14	8	9	11	2	7	14	7	13	9	0	6	8	8	3	8	27	48	4	12	6	8	5	4	8	5	4	12	16	12	5	21	3	3	2	9	3	0	4
OTU1135	Primary:Bacteria;Phylum:Bacillota;Class:Clostridia;Order:Eubacteriales;Family:Lachnospiraceae;Genus:NA;Species:NA;	4	53	59	86	25	1	22	63	16	46	31	48	50	4	7	59	36	32	41	1	4	14	25	22	8	21	43	26	3	19	24	35	64	25	17	49	120	20	20	24
OTU1138	Primary:Bacteria;Phylum:Bacillota;Class:Clostridia;Order:Eubacteriales;Family:NA;Genus:NA;Species:NA;	3	47	0	1	0	0	0	0	1	0	0	1	0	0	0	0	0	0	1	0	0	0	2	0	0	0	0	2	0	0	0	0	0	1	2	0	0	0	0	0
OTU114	Primary:Bacteria;Phylum:Bacillota;Class:Bacillota_incertae_sedis;Order:NA;Family:NA;Genus:Negativibacillus;Species:Negativibacillus_massiliensis;	103	22	90	9	194	2	10	147	64	42	2	16	40	15	142	0	0	29	34	317	1	1	78	4	0	11	7	34	3	6	4	2	2	1	128	4	16	2	61	6
OTU1141	Primary:Bacteria;Phylum:Bacillota;Class:Clostridia;Order:Eubacteriales;Family:Christensenellaceae;Genus:NA;Species:NA;	0	0	0	0	0	0	0	0	0	0	0	0	0	0	0	0	0	0	0	0	0	0	0	0	0	0	0	0	0	0	0	0	0	0	0	0	0	0	0	0
OTU1147	Primary:Bacteria;Phylum:Bacillota;Class:Clostridia;Order:Eubacteriales;Family:NA;Genus:NA;Species:NA;	57	107	94	567	151	326	4	38	191	93	129	24	59	60	77	42	98	86	2	1	54	266	145	252	281	208	160	17	38	58	107	302	59	266	45	76	73	16	2	133
OTU1148	Primary:Bacteria;Phylum:Bacillota;Class:Clostridia;Order:Eubacteriales;Family:Oscillospiraceae;Genus:NA;Species:NA;	15	20	15	7	12	0	4	16	4	5	0	6	2	4	10	8	5	8	1	14	0	2	3	0	0	0	0	2	3	0	0	1	8	0	3	3	7	1	0	33
OTU115	Primary:Bacteria;Phylum:Bacillota;Class:Clostridia;Order:Eubacteriales;Family:Oscillospiraceae;Genus:Lawsonibacter;Species:Lawsonibacter_hominis;	0	1	10	8	3	8	5	17	74	27	77	48	16	61	10	23	12	13	7	25	0	64	5	5	2	24	4	0	5	1	30	10	2	0	4	25	47	11	4	99
OTU1153	Primary:Bacteria;Phylum:Bacillota;Class:Clostridia;Order:Eubacteriales;Family:Oscillospiraceae;Genus:NA;Species:NA;	1	8	1	0	7	2	0	4	3	2	0	0	1	1	2	1	0	0	0	4	0	1	0	0	0	1	0	1	0	2	0	0	0	0	2	1	1	0	1	0
OTU1157	Primary:Bacteria;Phylum:Bacillota;Class:Clostridia;Order:Eubacteriales;Family:Oscillospiraceae;Genus:NA;Species:NA;	30	272	476	4	237	9	75	48	31	62	82	72	44	2	60	180	12	87	11	2	6	23	5	3	2	8	22	32	1	79	12	61	6	1	8	137	26	41	17	78
OTU1159	Primary:Bacteria;Phylum:Bacillota;Class:Clostridia;Order:Eubacteriales;Family:Lachnospiraceae;Genus:Enterocloster;Species:Enterocloster_bolteae;	16	28	68	26	67	59	40	41	89	72	171	242	79	220	69	50	63	130	342	107	130	37	40	130	45	45	67	20	40	63	162	38	150	23	37	39	135	86	20	131
OTU116	Primary:Bacteria;Phylum:Bacillota;Class:Clostridia;Order:Eubacteriales;Family:NA;Genus:NA;Species:NA;	154	34	29	58	3	26	9	254	117	42	15	15	255	30	2	237	12	20	2	0	1	129	31	2	2	3	1	1	10	5	131	19	3	8	12	12	1	47	2	49
OTU1161	Primary:Bacteria;Phylum:Bacillota;Class:Clostridia;Order:Eubacteriales;Family:Lachnospiraceae;Genus:NA;Species:NA;	0	2	0	0	3	3	2	0	1	1	0	0	0	0	0	1	1	0	0	0	1	0	0	0	0	0	0	0	0	0	0	0	0	0	0	0	0	0	1	0
OTU1162	Primary:Bacteria;Phylum:Bacillota;Class:Clostridia;Order:Eubacteriales;Family:Lachnospiraceae;Genus:NA;Species:NA;	113	81	188	685	212	442	306	199	387	245	398	1305	278	202	159	37	1003	316	379	113	347	218	274	95	77	1217	365	122	294	263	434	61	119	147	24	239	61	163	25	486
OTU1163	Primary:Bacteria;Phylum:Bacillota;Class:Clostridia;Order:Eubacteriales;Family:Lachnospiraceae;Genus:NA;Species:NA;	1	8	5	6	2	4	6	3	0	3	2	2	1	2	4	3	10	0	2	0	0	0	0	0	2	0	3	0	0	0	0	0	0	0	0	0	0	0	2	2
OTU1164	Primary:Bacteria;Phylum:Bacillota;Class:Clostridia;Order:Eubacteriales;Family:Oscillospiraceae;Genus:Gemmiger;Species:Gemmiger_gallinarum;	5	4	20	130	4	22	76	54	3	68	46	11	11	11	29	143	52	19	9	3	60	16	63	56	61	29	45	13	7	29	28	15	25	28	4	10	8	6	4	22
OTU1168	Primary:Bacteria;Phylum:Bacillota;Class:Clostridia;Order:Eubacteriales;Family:NA;Genus:NA;Species:NA;	1	0	59	0	1	0	1	0	6	0	0	0	49	0	0	0	1	0	0	0	0	2	10	0	21	0	1	0	2	0	5	10	0	1	0	0	0	0	47	1
OTU117	Primary:Bacteria;Phylum:Bacillota;Class:NA;Order:NA;Family:NA;Genus:NA;Species:NA;	19	55	3	141	70	72	2	1	84	122	12	7	4	0	0	59	50	8	1	0	26	0	5	48	27	1	10	1	2	120	34	18	29	61	15	118	8	5	7	60
OTU1170	Primary:Bacteria;Phylum:Bacillota;Class:Clostridia;Order:Eubacteriales;Family:Christensenellaceae;Genus:NA;Species:NA;	0	0	0	0	0	0	0	0	0	0	0	0	0	0	0	0	0	0	0	0	0	0	0	0	0	0	0	0	0	0	0	0	0	0	0	0	0	0	0	0
OTU1171	Primary:Bacteria;Phylum:Bacteroidota;Class:Bacteroidia;Order:Bacteroidales;Family:Muribaculaceae;Genus:Muribaculum;Species:NA;	0	0	0	0	0	0	0	0	0	0	0	0	0	0	0	0	0	0	0	0	0	0	0	0	0	0	0	0	0	0	0	0	0	0	0	0	0	0	0	0
OTU1173	Primary:Bacteria;Phylum:Pseudomonadota;Class:Gammaproteobacteria;Order:Pseudomonadales;Family:Pseudomonadaceae;Genus:Pseudomonas;Species:Pseudomonas_aeruginosa;	0	0	0	0	0	0	0	0	0	0	0	0	0	0	0	0	0	0	0	0	0	0	0	0	0	0	0	0	0	0	0	0	0	0	0	0	0	0	0	0
OTU1174	Primary:Bacteria;Phylum:Bacillota;Class:Clostridia;Order:Eubacteriales;Family:Oscillospiraceae;Genus:NA;Species:NA;	0	0	0	0	0	0	0	0	0	0	0	0	0	0	0	0	0	0	0	0	0	0	0	0	0	0	0	0	0	0	0	0	0	0	0	0	0	0	0	0
OTU1175	Primary:Bacteria;Phylum:Mycoplasmatota;Class:Mollicutes;Order:Anaeroplasmatales;Family:Anaeroplasmataceae;Genus:Anaeroplasma;Species:Anaeroplasma_bactoclasticum;	0	0	0	0	0	0	0	0	0	0	0	0	0	0	0	0	0	0	0	0	0	0	0	0	0	0	0	0	0	0	0	0	0	0	0	0	0	0	0	0
OTU1178	Primary:Bacteria;Phylum:Bacillota;Class:Clostridia;Order:Eubacteriales;Family:NA;Genus:NA;Species:NA;	0	0	0	0	0	0	0	0	0	0	0	0	0	0	0	0	0	0	0	0	0	0	0	0	0	0	0	0	0	0	0	0	0	0	0	0	0	0	0	0
OTU1179	Primary:Bacteria;Phylum:Bacillota;Class:Clostridia;Order:Eubacteriales;Family:NA;Genus:NA;Species:NA;	11	5	5	5	18	9	1	1	1	2	8	4	5	18	11	8	3	6	7	0	2	11	8	6	7	3	20	1	5	6	7	8	7	12	1	16	4	15	3	8
OTU118	Primary:Bacteria;Phylum:Bacillota;Class:Clostridia;Order:Eubacteriales;Family:Oscillospiraceae;Genus:NA;Species:NA;	50	8	18	61	31	18	21	18	25	28	19	31	31	54	5	5	19	33	5	5	128	35	12	100	51	132	30	4	61	25	41	44	15	144	20	64	27	20	2	22
OTU1183	Primary:Bacteria;Phylum:Spirochaetota;Class:Spirochaetia;Order:Spirochaetales;Family:Treponemataceae;Genus:Treponema;Species:Treponema_brennaborense;	0	0	0	0	0	0	0	0	0	0	0	0	0	0	0	0	0	0	0	0	0	0	0	0	0	0	0	0	0	0	0	0	0	0	0	0	0	0	0	0
OTU1188	Primary:Bacteria;Phylum:Bacteroidota;Class:Bacteroidia;Order:Bacteroidales;Family:Rikenellaceae;Genus:NA;Species:NA;	0	0	0	0	0	0	0	0	0	0	0	0	0	0	0	0	0	0	0	0	0	0	0	0	0	0	0	0	0	0	0	0	0	0	0	0	0	0	0	0
OTU119	Primary:Bacteria;Phylum:NA;Class:NA;Order:NA;Family:NA;Genus:NA;Species:NA;	9	34	0	53	20	17	1	25	6	23	31	134	4	6	16	21	7	0	0	48	1	1	17	208	26	0	14	5	1	40	28	78	17	14	219	43	79	16	6	16
OTU1197	Primary:Bacteria;Phylum:Bacillota;Class:Clostridia;Order:Eubacteriales;Family:Lachnospiraceae;Genus:NA;Species:NA;	4	4	2	3	1	0	3	2	2	1	1	7	1	2	3	0	3	0	2	4	3	0	1	0	0	1	2	0	0	0	1	0	0	0	0	0	0	0	0	0
OTU1198	Primary:Bacteria;Phylum:Bacillota;Class:Clostridia;Order:Eubacteriales;Family:Lachnospiraceae;Genus:NA;Species:NA;	11	9	12	30	14	30	20	8	38	16	27	41	11	47	10	13	35	6	11	1	22	24	3	41	13	19	27	1	33	35	25	11	11	31	0	45	15	15	2	46
OTU12	Primary:Bacteria;Phylum:Bacillota;Class:Negativicutes;Order:Selenomonadales;Family:Selenomonadaceae;Genus:Megamonas;Species:Megamonas_funiformis;	305	1138	2432	352	485	67	600	189	165	2108	132	4175	2218	676	413	34	291	1942	4250	2302	41	680	1294	185	365	968	3244	13604	6335	157	484	183	599	159	131	30	41	153	1309	414
OTU120	Primary:Bacteria;Phylum:Bacillota;Class:Clostridia;Order:Eubacteriales;Family:Lachnospiraceae;Genus:Anaerotignum;Species:Anaerotignum_lactatifermentans;	14	6	23	5	6	1	1	21	19	5	8	45	9	11	11	54	3	7	12	16	0	8	11	1	1	4	4	6	0	3	26	24	8	3	60	34	176	23	86	18
OTU1202	Primary:Bacteria;Phylum:Bacillota;Class:Clostridia;Order:Eubacteriales;Family:Oscillospiraceae;Genus:NA;Species:NA;	36	45	116	2	51	5	3	74	15	5	6	4	17	54	30	92	2	12	14	78	0	1	26	0	0	3	7	34	5	5	6	13	9	2	18	5	26	29	89	42
OTU1204	Primary:Bacteria;Phylum:Bacillota;Class:Clostridia;Order:Eubacteriales;Family:Oscillospiraceae;Genus:NA;Species:NA;	0	0	0	0	0	0	0	0	0	0	0	0	0	0	0	0	0	0	0	0	0	0	0	0	0	0	0	0	0	0	0	0	0	0	0	0	0	0	0	0
OTU1208	Primary:Bacteria;Phylum:Bacillota;Class:Clostridia;Order:Eubacteriales;Family:Oscillospiraceae;Genus:NA;Species:NA;	4	1	22	2	1	1	2	3	2	4	2	8	6	2	11	20	0	5	13	6	0	3	5	1	0	0	1	1	3	6	5	19	3	3	0	14	5	20	2	8
OTU1209	Primary:Bacteria;Phylum:Bacillota;Class:Clostridia;Order:Eubacteriales;Family:Lachnospiraceae;Genus:NA;Species:NA;	11	1	1	0	1	1	4	1	8	6	0	1	9	12	1	1	0	4	0	0	2	0	0	1	1	1	0	0	0	1	1	1	0	1	1	0	0	1	1	2
OTU121	Primary:Bacteria;Phylum:Bacillota;Class:Clostridia;Order:Eubacteriales;Family:Eubacteriaceae;Genus:Gallibacter;Species:Gallibacter_intestinalis;	126	55	17	37	78	0	87	21	31	65	39	8	28	24	0	0	89	3	18	2	18	26	27	15	31	19	2	8	6	10	31	12	22	4	57	24	6	13	37	8
OTU1210	Primary:Bacteria;Phylum:Bacillota;Class:Clostridia;Order:Eubacteriales;Family:Christensenellaceae;Genus:NA;Species:NA;	0	0	0	0	0	0	0	0	0	0	0	0	0	0	0	0	0	0	0	0	0	0	0	0	0	0	0	0	0	0	0	0	0	0	0	0	0	0	0	0
OTU1212	Primary:Bacteria;Phylum:Bacillota;Class:Clostridia;Order:Eubacteriales;Family:Oscillospiraceae;Genus:Ruthenibacterium;Species:Ruthenibacterium_lactatiformans;	0	0	0	0	0	0	0	0	0	0	0	0	0	0	0	0	0	0	0	0	0	0	0	0	0	0	0	0	0	0	0	0	0	0	0	0	0	0	0	0
OTU1213	Primary:Bacteria;Phylum:Actinomycetota;Class:Coriobacteriia;Order:Eggerthellales;Family:Eggerthellaceae;Genus:NA;Species:NA;	0	0	0	0	0	0	0	0	0	0	0	0	0	0	0	0	0	0	0	0	0	0	0	0	0	0	0	0	0	0	0	0	0	0	0	0	0	0	0	0
OTU1214	Primary:Bacteria;Phylum:Bacillota;Class:Clostridia;Order:Eubacteriales;Family:Lachnospiraceae;Genus:NA;Species:NA;	5	4	7	18	6	11	10	3	14	7	25	56	11	2	10	1	29	7	7	7	15	9	9	3	1	47	6	2	13	9	13	1	3	1	1	9	0	4	0	12
OTU1216	Primary:Bacteria;Phylum:Bacillota;Class:Clostridia;Order:Eubacteriales;Family:Lachnospiraceae;Genus:Mediterraneibacter;Species:NA;	363	260	204	436	134	302	904	395	446	546	639	165	1179	1989	1166	33	915	632	5631	722	3615	281	1075	192	908	235	2580	659	343	530	747	335	1453	461	39	97	96	1421	46	144
OTU1219	Primary:Bacteria;Phylum:Bacillota;Class:Clostridia;Order:Eubacteriales;Family:Oscillospiraceae;Genus:NA;Species:NA;	0	0	0	0	1	0	0	0	0	0	0	0	0	0	1	0	0	0	0	0	0	1	0	0	0	0	0	0	0	2	0	0	0	0	2	0	0	0	2	0
OTU122	Primary:Bacteria;Phylum:NA;Class:NA;Order:NA;Family:NA;Genus:NA;Species:NA;	1	0	0	0	0	7	2	0	43	1	6	251	1	127	58	1	2	0	2	1	0	22	22	1	1	0	0	16	0	1	6	1	0	0	0	1	0	0	0	0
OTU1221	Primary:Bacteria;Phylum:Bacillota;Class:Negativicutes;Order:NA;Family:NA;Genus:NA;Species:NA;	1	1	0	1	7	1	1	0	0	20	1	1	0	0	0	0	0	7	1	0	0	4	3	0	13	2	2	1	0	2	1	0	1	1	0	1	1	0	0	0
OTU1223	Primary:Bacteria;Phylum:Bacillota;Class:Clostridia;Order:Eubacteriales;Family:Oscillospiraceae;Genus:Fournierella;Species:Fournierella_massiliensis;	0	0	2	6	0	1	5	1	2	8	3	0	8	0	11	0	6	0	0	0	8	1	3	0	6	1	34	0	1	0	0	0	3	7	0	0	1	0	1	0
OTU1224	Primary:Bacteria;Phylum:Bacillota;Class:Clostridia;Order:Eubacteriales;Family:NA;Genus:NA;Species:NA;	1	2	0	0	3	0	0	0	0	0	0	1	0	0	0	0	0	0	0	3	0	0	0	2	0	0	0	0	0	0	0	0	0	0	4	0	0	0	0	0
OTU1226	Primary:Bacteria;Phylum:Bacillota;Class:Clostridia;Order:Eubacteriales;Family:Oscillospiraceae;Genus:NA;Species:NA;	1	1	3	0	0	0	1	6	0	3	2	0	3	0	0	3	0	1	2	1	0	0	0	1	0	0	1	0	0	1	0	1	5	1	2	1	5	1	1	4
OTU1228	Primary:Bacteria;Phylum:Pseudomonadota;Class:Deltaproteobacteria;Order:NA;Family:NA;Genus:NA;Species:NA;	0	0	0	0	1	0	0	6	0	0	0	1	0	0	1	0	0	0	0	0	0	0	0	1	0	0	0	0	0	0	1	1	0	0	0	0	0	0	0	0
OTU123	Primary:Bacteria;Phylum:Bacillota;Class:Clostridia;Order:Eubacteriales;Family:Oscillospiraceae;Genus:NA;Species:NA;	45	0	25	70	3	8	26	2	4	72	31	0	6	17	2	1	7	62	4	0	56	92	21	17	32	13	41	3	332	12	32	6	40	10	4	21	4	3	0	0
OTU1230	Primary:Bacteria;Phylum:Actinomycetota;Class:Coriobacteriia;Order:Coriobacteriales;Family:Coriobacteriaceae;Genus:Enorma;Species:Enorma_timonensis;	1	2	1	0	0	1	1	0	1	1	4	0	1	1	2	1	0	1	1	1	0	1	1	0	0	2	0	0	0	0	1	0	6	0	1	0	0	0	0	0
OTU1231	Primary:Bacteria;Phylum:Bacillota;Class:Clostridia;Order:Eubacteriales;Family:Lachnospiraceae;Genus:NA;Species:NA;	7	9	14	31	7	27	19	7	41	16	31	55	22	31	21	5	62	13	313	8	28	23	32	17	6	53	40	10	20	29	24	5	30	13	1	16	15	20	4	31
OTU1232	Primary:Bacteria;Phylum:Bacillota;Class:Clostridia;Order:Eubacteriales;Family:Oscillospiraceae;Genus:NA;Species:NA;	3	4	2	3	2	2	1	5	4	1	3	1	2	2	3	1	2	3	0	1	2	3	1	0	1	2	2	1	3	0	5	5	8	2	0	1	2	3	1	2
OTU1239	Primary:Bacteria;Phylum:Bacillota;Class:Clostridia;Order:Eubacteriales;Family:Lachnospiraceae;Genus:NA;Species:NA;	128	95	113	142	126	77	278	117	147	281	162	122	265	299	209	32	299	158	508	130	286	112	220	91	182	128	318	182	127	154	225	98	272	195	8	109	134	224	18	83
OTU124	Primary:Bacteria;Phylum:Bacillota;Class:Erysipelotrichia;Order:Erysipelotrichales;Family:Coprobacillaceae;Genus:Thomasclavelia;Species:NA;	56	84	9	9	16	1	19	16	11	24	6	90	31	21	70	33	8	13	29	82	17	11	16	3	17	16	13	81	61	8	37	26	35	9	5	31	6	14	14	18
OTU1240	Primary:Bacteria;Phylum:Bacillota;Class:Clostridia;Order:Eubacteriales;Family:Christensenellaceae;Genus:NA;Species:NA;	0	0	1	0	0	0	0	0	0	0	0	0	0	0	0	1	0	0	0	1	0	0	0	0	0	0	0	0	1	0	0	0	0	0	1	0	0	0	0	0
OTU1242	Primary:Bacteria;Phylum:Bacillota;Class:Clostridia;Order:Eubacteriales;Family:Oscillospiraceae;Genus:Gemmiger;Species:Gemmiger_gallinarum;	163	6	41	191	103	16	23	9	33	34	14	6	110	3	68	10	71	28	7	3	918	19	53	14	38	23	165	7	51	15	26	8	112	72	2	120	190	118	7	82
OTU1243	Primary:Bacteria;Phylum:Bacillota;Class:Clostridia;Order:Eubacteriales;Family:NA;Genus:NA;Species:NA;	1	0	4	7	6	7	3	1	2	8	5	17	4	5	0	1	4	15	0	0	0	12	5	9	97	2	2	0	20	0	3	0	2	4	1	0	0	0	0	5
OTU1244	Primary:Bacteria;Phylum:Bacillota;Class:Clostridia;Order:Eubacteriales;Family:Lachnospiraceae;Genus:NA;Species:NA;	20	15	18	18	28	22	33	24	49	32	42	17	46	30	38	4	103	28	12	3	37	17	23	12	2	35	46	7	44	42	32	5	9	18	1	17	6	1	1	19
OTU1247	Primary:Bacteria;Phylum:Bacillota;Class:Clostridia;Order:Eubacteriales;Family:Lachnospiraceae;Genus:Blautia;Species:NA;	3	5	7	1	0	2	3	11	28	2	61	10	11	53	1	45	3	9	16	1	0	4	4	0	0	1	5	0	0	2	16	9	3	2	1	7	21	6	0	49
OTU1248	Primary:Bacteria;Phylum:Bacillota;Class:Clostridia;Order:Eubacteriales;Family:Lachnospiraceae;Genus:Enterocloster;Species:Enterocloster_bolteae;	8	10	15	12	17	11	13	10	21	18	32	76	21	30	16	7	24	17	35	13	13	6	12	18	4	42	17	9	18	18	30	4	13	7	5	13	27	16	3	26
OTU125	Primary:Bacteria;Phylum:Bacillota;Class:Clostridia;Order:Eubacteriales;Family:Oscillospiraceae;Genus:NA;Species:NA;	18	14	43	14	26	9	13	34	19	10	56	50	56	17	18	109	11	29	9	11	1	13	11	9	1	10	18	6	73	20	14	20	17	23	11	5	35	47	3	26
OTU1251	Primary:Bacteria;Phylum:Bacillota;Class:Clostridia;Order:Eubacteriales;Family:Oscillospiraceae;Genus:Gemmiger;Species:Gemmiger_formicilis;	0	0	3	1	1	6	12	0	6	3	2	1	0	0	0	0	7	9	0	0	2	2	0	0	0	5	0	0	0	1	1	1	0	0	0	3	0	0	0	1
OTU1253	Primary:Bacteria;Phylum:Bacillota;Class:Clostridia;Order:Eubacteriales;Family:Oscillospiraceae;Genus:NA;Species:NA;	0	0	1	0	1	1	1	1	0	1	1	0	0	0	0	1	0	3	0	1	0	0	2	0	0	2	0	0	0	0	0	0	0	0	2	0	0	0	0	1
OTU1254	Primary:Bacteria;Phylum:Bacillota;Class:Clostridia;Order:Eubacteriales;Family:Oscillospiraceae;Genus:Sporobacter;Species:Sporobacter_termitidis;	1	0	1	1	3	2	2	0	5	2	0	0	0	1	1	2	3	0	1	2	4	3	0	7	0	4	1	0	0	7	11	8	3	5	1	9	9	2	0	1
OTU126	Primary:Bacteria;Phylum:Bacillota;Class:Clostridia;Order:Eubacteriales;Family:NA;Genus:NA;Species:NA;	155	48	12	159	105	142	26	44	42	31	34	1	13	0	86	9	4	0	0	1	4	13	24	6	231	166	15	3	4	4	6	32	0	49	6	5	52	51	14	71
OTU1263	Primary:Bacteria;Phylum:Bacillota;Class:Clostridia;Order:Eubacteriales;Family:Lachnospiraceae;Genus:NA;Species:NA;	1	2	2	0	4	0	0	4	11	1	10	9	5	4	5	10	0	5	5	4	0	1	2	0	0	2	0	0	0	0	10	3	8	3	0	9	18	15	3	19
OTU1264	Primary:Bacteria;Phylum:Bacillota;Class:Erysipelotrichia;Order:Erysipelotrichales;Family:Erysipelotrichaceae;Genus:Faecalibacillus;Species:Faecalibacillus_intestinalis;	0	0	0	0	0	0	0	0	0	0	0	0	0	0	0	0	0	0	0	0	0	0	0	0	0	0	0	0	0	0	0	0	0	0	0	0	0	0	0	0
OTU1266	Primary:Bacteria;Phylum:Synergistota;Class:Synergistia;Order:Synergistales;Family:Synergistaceae;Genus:Cloacibacillus;Species:Cloacibacillus_porcorum;	1	0	14	26	2	164	37	2	39	13	11	1	0	4	1	4	43	25	4	1	2	37	2	22	22	61	7	1	1	5	10	6	20	22	0	44	20	6	2	15
OTU1267	Primary:Bacteria;Phylum:Bacillota;Class:Clostridia;Order:Eubacteriales;Family:Lachnospiraceae;Genus:NA;Species:NA;	0	2	5	0	4	0	3	5	1	9	0	0	0	5	0	0	1	1	4	0	0	2	3	1	4	0	3	0	0	0	0	1	4	2	1	4	4	1	0	0
OTU1269	Primary:Bacteria;Phylum:Bacillota;Class:Clostridia;Order:Eubacteriales;Family:Lachnospiraceae;Genus:NA;Species:NA;	3	3	1	8	6	21	2	1	0	142	2	0	2	0	0	0	29	51	0	0	1	25	20	5	52	0	0	0	0	1	28	2	8	15	2	4	28	2	0	1
OTU127	Primary:Bacteria;Phylum:Bacillota;Class:Clostridia;Order:Eubacteriales;Family:Lachnospiraceae;Genus:NA;Species:NA;	26	37	55	35	36	26	28	26	130	199	180	329	114	1291	830	22	190	60	53	35	46	89	11	28	19	124	88	3	58	427	130	33	76	31	7	54	46	112	9	457
OTU1271	Primary:Bacteria;Phylum:Bacillota;Class:Clostridia;Order:Eubacteriales;Family:Oscillospiraceae;Genus:NA;Species:NA;	2	1	4	0	1	0	0	5	4	0	4	5	5	8	1	7	0	0	5	1	0	1	1	0	0	3	0	0	0	2	9	9	1	2	0	1	24	8	1	18
OTU1274	Primary:Bacteria;Phylum:Bacillota;Class:Clostridia;Order:Eubacteriales;Family:Lachnospiraceae;Genus:NA;Species:NA;	0	6	1	1	5	2	3	3	12	5	7	14	4	8	2	0	2	5	8	2	0	7	6	3	4	4	10	1	7	4	5	4	3	4	0	10	24	14	0	9
OTU1275	Primary:Bacteria;Phylum:Bacillota;Class:Clostridia;Order:Eubacteriales;Family:NA;Genus:NA;Species:NA;	0	0	0	0	0	0	0	0	0	0	0	0	0	0	0	0	0	0	0	0	0	0	0	0	0	0	0	0	0	0	0	0	0	0	0	0	0	0	0	0
OTU1277	Primary:Bacteria;Phylum:Bacillota;Class:Clostridia;Order:Eubacteriales;Family:Christensenellaceae;Genus:NA;Species:NA;	0	3	0	1	3	3	1	3	7	3	4	3	6	1	9	27	4	0	1	2	8	5	1	0	5	11	4	0	14	0	15	20	6	5	1	14	0	12	0	2
OTU128	Primary:Bacteria;Phylum:Bacillota;Class:Clostridia;Order:Eubacteriales;Family:Oscillospiraceae;Genus:NA;Species:NA;	6	5	31	24	14	44	22	16	16	16	42	73	8	44	16	12	4	26	22	13	60	40	8	24	16	12	39	7	114	18	61	13	30	24	3	17	15	67	4	14
OTU1282	Primary:Bacteria;Phylum:Synergistota;Class:Synergistia;Order:Synergistales;Family:Synergistaceae;Genus:Cloacibacillus;Species:NA;	0	0	0	0	0	0	0	0	0	0	0	0	0	0	0	0	0	0	0	0	0	0	0	0	0	0	0	0	0	0	0	0	0	0	0	0	0	0	0	0
OTU1284	Primary:Bacteria;Phylum:Bacillota;Class:Clostridia;Order:Eubacteriales;Family:Lachnospiraceae;Genus:NA;Species:NA;	15	37	40	41	79	12	98	45	91	57	63	83	114	138	49	99	44	54	127	26	25	30	37	28	19	22	121	24	15	88	63	119	179	108	6	133	113	142	10	48
OTU1285	Primary:Bacteria;Phylum:NA;Class:NA;Order:NA;Family:NA;Genus:NA;Species:NA;	0	0	0	0	0	0	0	0	0	0	0	0	0	0	0	0	0	0	0	0	0	0	0	0	0	0	0	0	0	0	0	0	0	0	0	0	0	0	0	0
OTU1287	Primary:Bacteria;Phylum:Bacteroidota;Class:Bacteroidia;Order:Bacteroidales;Family:Prevotellaceae;Genus:Prevotellamassilia;Species:Prevotellamassilia_timonensis;	4	4	9	3	0	3	1	1	0	2	2	5	0	1	4	0	0	0	11	4	1	0	0	0	0	0	0	1	0	2	0	0	0	0	0	2	0	0	0	0
OTU1289	Primary:Bacteria;Phylum:Bacillota;Class:Clostridia;Order:Eubacteriales;Family:Oscillospiraceae;Genus:NA;Species:NA;	0	0	0	0	0	0	0	0	0	0	0	0	0	0	0	0	0	0	0	0	0	0	0	0	0	0	0	0	0	0	0	0	0	0	0	0	0	0	0	0
OTU129	Primary:Bacteria;Phylum:NA;Class:NA;Order:NA;Family:NA;Genus:NA;Species:NA;	4	0	0	0	0	0	0	3	0	0	5	13	0	4	2	91	0	0	0	11	26	5	1	9	0	25	7	0	55	12	8	68	4	0	8	6	2	9	4	0
OTU1290	Primary:Bacteria;Phylum:Bacillota;Class:Clostridia;Order:Eubacteriales;Family:Lachnospiraceae;Genus:NA;Species:NA;	6	9	9	16	11	3	6	18	11	45	24	35	35	196	160	3	36	13	58	6	18	13	5	9	12	16	40	7	6	54	24	5	41	7	1	11	5	18	3	36
OTU1293	Primary:Bacteria;Phylum:Bacillota;Class:Bacilli;Order:Caryophanales;Family:Bacillaceae;Genus:Priestia;Species:Priestia_megaterium;	0	0	0	0	1	0	0	0	0	0	0	0	0	0	0	0	0	0	0	1	0	0	0	1	2	0	0	0	0	0	0	0	0	0	0	0	0	1	1	0
OTU1294	Primary:Bacteria;Phylum:Bacillota;Class:Clostridia;Order:Eubacteriales;Family:Oscillospiraceae;Genus:Monoglobus;Species:Monoglobus_pectinilyticus;	0	0	0	13	0	0	0	0	5	0	4	0	0	0	0	5	0	2	0	0	25	1	0	8	0	1	1	0	0	5	25	12	13	15	0	2	1	2	2	12
OTU1297	Primary:Bacteria;Phylum:Bacillota;Class:Clostridia;Order:Eubacteriales;Family:Lachnospiraceae;Genus:Laedolimicola;Species:Laedolimicola_ammoniilytica;	7	17	37	14	18	16	22	33	33	25	48	89	55	21	14	12	14	31	51	13	25	44	11	15	27	72	34	16	71	33	28	18	15	22	5	61	37	33	0	27
OTU13	Primary:Bacteria;Phylum:Bacillota;Class:Clostridia;Order:Eubacteriales;Family:Oscillospiraceae;Genus:Neglecta;Species:Neglecta_timonensis;	267	13	15	161	18	128	108	20	44	97	281	169	57	287	404	377	92	181	41	14	1197	212	169	368	107	106	170	26	76	994	271	40	565	211	20	641	680	452	14	520
OTU130	Primary:Bacteria;Phylum:Bacteroidota;Class:Bacteroidia;Order:Bacteroidales;Family:Muribaculaceae;Genus:NA;Species:NA;	23	19	0	16	45	8	3	87	12	4	4	1	4	1	23	0	2	1	1	29	5	7	15	3	9	8	1	7	3	4	2	4	3	6	278	4	8	0	56	0
OTU1300	Primary:Bacteria;Phylum:NA;Class:NA;Order:NA;Family:NA;Genus:NA;Species:NA;	0	0	0	0	0	0	0	0	0	0	0	0	0	0	0	0	0	0	0	0	0	0	0	0	0	0	0	0	0	0	0	0	0	0	0	0	0	0	0	0
OTU1302	Primary:Bacteria;Phylum:Bacillota;Class:Clostridia;Order:Eubacteriales;Family:Lachnospiraceae;Genus:NA;Species:NA;	11	27	23	72	30	34	54	64	56	38	89	190	98	96	80	64	39	55	132	35	113	75	23	41	37	85	104	26	59	117	53	71	84	53	11	101	88	176	6	76
OTU1304	Primary:Bacteria;Phylum:Bacillota;Class:Clostridia;Order:Eubacteriales;Family:Oscillospiraceae;Genus:NA;Species:NA;	0	2	2	0	0	0	0	1	0	0	3	0	1	0	0	2	0	4	0	0	0	0	0	0	0	0	1	0	0	3	2	0	0	0	1	1	0	1	0	0
OTU1305	Primary:Bacteria;Phylum:Bacillota;Class:Clostridia;Order:Eubacteriales;Family:NA;Genus:NA;Species:NA;	17	29	0	2	19	2	5	17	7	5	15	0	13	83	45	36	6	47	2	8	48	1	2	13	2	1	10	2	0	18	7	10	42	5	9	17	11	26	3	14
OTU1306	Primary:Bacteria;Phylum:Bacillota;Class:Clostridia;Order:Eubacteriales;Family:Lachnospiraceae;Genus:NA;Species:NA;	2	0	21	1	0	1	15	7	0	9	11	3	42	17	0	1	4	25	9	2	1	2	2	9	1	0	1	0	0	0	10	9	2	0	3	2	2	7	2	0
OTU1307	Primary:Bacteria;Phylum:Bacillota;Class:Clostridia;Order:Eubacteriales;Family:NA;Genus:NA;Species:NA;	49	30	41	132	52	100	30	20	41	31	30	48	37	105	28	32	48	34	10	2	71	51	80	40	56	33	96	2	43	42	27	97	58	106	5	29	28	39	6	50
OTU1308	Primary:Bacteria;Phylum:Bacillota;Class:Clostridia;Order:Eubacteriales;Family:Lachnospiraceae;Genus:NA;Species:NA;	0	0	0	0	0	0	0	0	0	0	0	0	0	0	0	0	0	0	0	0	0	0	0	0	0	0	0	0	0	0	0	0	0	0	0	0	0	0	0	0
OTU1309	Primary:Bacteria;Phylum:Bacillota;Class:Clostridia;Order:Eubacteriales;Family:Lachnospiraceae;Genus:NA;Species:NA;	4	6	4	27	5	22	28	15	14	13	14	6	8	80	11	2	54	19	196	14	59	19	15	30	56	13	24	7	5	42	15	13	36	43	1	16	10	40	3	8
OTU131	Primary:Bacteria;Phylum:Bacillota;Class:Clostridia;Order:Eubacteriales;Family:Oscillospiraceae;Genus:Ructibacterium;Species:Ructibacterium_gallinarum;	3	15	11	8	2	7	5	2	10	19	46	27	21	7	14	6	1	3	12	0	159	11	4	231	5	28	2	1	95	220	97	39	77	62	23	152	99	27	12	7
OTU1311	Primary:Bacteria;Phylum:Bacillota;Class:Clostridia;Order:Eubacteriales;Family:Lachnospiraceae;Genus:NA;Species:NA;	5	12	10	13	3	0	7	6	5	1	2	7	0	1	5	3	5	1	9	4	2	4	0	0	0	0	0	1	2	0	0	0	0	0	0	2	0	0	0	2
OTU1312	Primary:Bacteria;Phylum:Bacillota;Class:Clostridia;Order:Eubacteriales;Family:Oscillospiraceae;Genus:Anaerofilum;Species:NA;	0	1	2	0	0	0	1	1	0	0	0	0	2	1	0	0	0	1	0	0	0	0	0	0	1	0	0	0	0	0	1	0	0	0	0	0	1	0	0	0
OTU1313	Primary:Bacteria;Phylum:Bacillota;Class:Clostridia;Order:Eubacteriales;Family:Oscillospiraceae;Genus:NA;Species:NA;	0	0	0	0	0	0	0	0	0	0	0	0	0	0	0	0	0	0	0	0	0	0	0	0	0	0	0	0	0	0	0	0	0	0	0	0	0	0	0	0
OTU1315	Primary:Bacteria;Phylum:Bacillota;Class:Clostridia;Order:Eubacteriales;Family:Lachnospiraceae;Genus:Lacrimispora;Species:NA;	24	39	14	9	8	7	40	35	12	10	3	2	1	2	21	18	21	4	4	15	4	0	0	1	1	0	1	0	1	0	0	0	0	0	0	0	1	0	5	1
OTU132	Primary:Bacteria;Phylum:Bacillota;Class:Bacilli;Order:Lactobacillales;Family:Lactobacillaceae;Genus:Lactobacillus;Species:Lactobacillus_johnsonii;	18	12	71	21	12	17	26	10	11	18	13	13	17	28	28	14	29	19	16	13	54	6	1	43	26	21	11	1	16	5	51	16	41	14	33	13	29	30	48	39
OTU1320	Primary:Bacteria;Phylum:Spirochaetota;Class:Spirochaetia;Order:Spirochaetales;Family:Treponemataceae;Genus:Treponema;Species:NA;	0	0	0	0	0	0	0	0	0	0	0	0	0	0	0	0	0	0	0	0	0	0	0	0	0	0	0	0	0	0	0	0	0	0	0	0	0	0	0	0
OTU1321	Primary:Bacteria;Phylum:Bacillota;Class:Clostridia;Order:Eubacteriales;Family:Oscillospiraceae;Genus:NA;Species:NA;	4	5	260	11	36	11	0	3	4	0	11	4	0	1	4	1	1	5	0	0	0	0	35	0	27	1	2	1	0	0	7	1	3	3	4	1	7	6	2	12
OTU1323	Primary:Bacteria;Phylum:Bacillota;Class:Clostridia;Order:Eubacteriales;Family:Lachnospiraceae;Genus:Anaerotignum;Species:Anaerotignum_lactatifermentans;	10	5	10	0	10	0	4	9	2	2	3	0	6	2	11	12	1	7	0	2	2	0	3	0	0	1	0	3	0	0	3	0	1	2	5	2	5	2	2	5
OTU1324	Primary:Bacteria;Phylum:Bacillota;Class:Clostridia;Order:Eubacteriales;Family:NA;Genus:NA;Species:NA;	23	14	27	99	20	21	39	25	28	27	22	42	6	17	4	172	118	8	2	1	27	36	7	44	9	95	26	5	36	27	26	55	24	58	15	47	21	99	2	46
OTU1325	Primary:Bacteria;Phylum:Bacteroidota;Class:Bacteroidia;Order:Bacteroidales;Family:Muribaculaceae;Genus:Duncaniella;Species:Duncaniella_muris;	0	0	0	0	0	0	0	0	0	0	0	0	0	0	0	0	0	0	0	0	0	0	0	0	0	0	0	0	0	0	0	0	0	0	0	0	0	0	0	0
OTU1328	Primary:Bacteria;Phylum:Bacillota;Class:Clostridia;Order:Eubacteriales;Family:Lachnospiraceae;Genus:Laedolimicola;Species:Laedolimicola_ammoniilytica;	4	62	3	7	16	3	0	1	13	1	54	29	3	3	6	21	28	6	5	2	2	28	15	11	2	28	48	5	1	57	18	3	29	13	6	72	113	242	42	38
OTU1329	Primary:Bacteria;Phylum:Bacillota;Class:Clostridia;Order:Eubacteriales;Family:Lachnospiraceae;Genus:NA;Species:NA;	1	1	0	1	0	0	0	0	0	0	0	0	0	0	0	2	0	0	0	0	0	0	0	0	0	2	0	0	0	0	0	0	1	0	0	0	0	0	0	0
OTU133	Primary:Bacteria;Phylum:Bacillota;Class:Clostridia;Order:Eubacteriales;Family:NA;Genus:NA;Species:NA;	131	23	18	135	47	577	33	83	210	44	32	96	49	11	4	119	38	62	5	2	125	242	71	64	89	107	76	2	92	46	87	102	73	189	40	28	54	44	5	77
OTU1331	Primary:Bacteria;Phylum:Bacillota;Class:Clostridia;Order:Eubacteriales;Family:Lachnospiraceae;Genus:NA;Species:NA;	0	0	0	0	0	0	0	0	0	0	0	0	0	0	0	0	0	0	0	0	0	0	0	0	0	0	0	0	0	0	0	0	0	0	0	0	0	0	0	0
OTU1332	Primary:Bacteria;Phylum:Bacillota;Class:Clostridia;Order:Eubacteriales;Family:NA;Genus:NA;Species:NA;	0	0	0	7	0	0	0	0	0	1	0	0	0	0	0	0	0	1	0	0	0	0	0	0	0	1	0	0	2	0	0	0	0	2	0	0	0	0	0	0
OTU134	Primary:Bacteria;Phylum:Bacillota;Class:Clostridia;Order:Eubacteriales;Family:Lachnospiraceae;Genus:Gallintestinimicrobium;Species:Gallintestinimicrobium_propionicum;	30	26	51	28	29	62	286	62	79	40	115	50	64	89	19	17	330	161	69	99	22	481	13	30	20	64	35	31	15	56	56	46	619	65	8	62	49	142	13	51
OTU1340	Primary:Bacteria;Phylum:Bacillota;Class:Clostridia;Order:Eubacteriales;Family:Oscillospiraceae;Genus:NA;Species:NA;	3	7	0	0	15	3	0	4	1	1	0	1	1	0	0	1	0	0	1	10	0	0	5	0	1	0	0	6	0	0	0	2	0	0	15	0	3	0	10	0
OTU1342	Primary:Bacteria;Phylum:Bacillota;Class:Erysipelotrichia;Order:Erysipelotrichales;Family:NA;Genus:NA;Species:NA;	0	0	0	0	0	0	0	0	0	0	0	0	0	0	0	0	0	0	0	0	0	0	0	0	0	0	0	0	0	0	0	0	0	0	0	0	0	0	0	0
OTU1345	Primary:Bacteria;Phylum:Bacillota;Class:Erysipelotrichia;Order:Erysipelotrichales;Family:Erysipelotrichaceae;Genus:Massilimicrobiota;Species:Massilimicrobiota_timonensis;	0	0	0	0	0	0	0	0	0	0	0	0	0	0	0	0	0	0	0	0	0	0	0	0	0	0	0	0	0	0	0	0	0	0	0	0	0	0	0	0
OTU1346	Primary:Bacteria;Phylum:Bacillota;Class:Clostridia;Order:Eubacteriales;Family:NA;Genus:NA;Species:NA;	0	0	0	0	1	0	0	0	0	0	0	0	0	1	0	0	0	0	0	0	0	1	1	1	1	0	1	0	1	0	0	0	0	1	0	0	1	0	0	1
OTU1347	Primary:Bacteria;Phylum:Bacteroidota;Class:Bacteroidia;Order:Bacteroidales;Family:Rikenellaceae;Genus:Alistipes;Species:NA;	2	0	0	0	4	0	0	1	1	0	0	0	0	0	1	0	0	0	0	1	0	0	0	0	0	0	0	2	0	0	0	0	0	0	8	0	0	0	4	0
OTU1348	Primary:Bacteria;Phylum:Bacillota;Class:Clostridia;Order:Eubacteriales;Family:Lachnospiraceae;Genus:NA;Species:NA;	0	0	0	0	0	0	0	0	0	0	0	0	0	0	0	0	0	0	0	0	0	0	0	0	0	0	0	0	0	0	0	0	0	0	0	0	0	0	0	0
OTU135	Primary:Bacteria;Phylum:NA;Class:NA;Order:NA;Family:NA;Genus:NA;Species:NA;	103	106	8	61	123	136	24	64	107	9	48	1	41	1	0	74	20	1	0	0	20	7	36	50	7	9	7	2	7	71	36	30	7	58	53	51	13	18	15	2
OTU1350	Primary:Bacteria;Phylum:Bacillota;Class:Clostridia;Order:Eubacteriales;Family:NA;Genus:NA;Species:NA;	9	4	29	29	390	10	7	9	6	6	34	24	96	8	7	12	39	20	6	4	7	35	3	4	7	57	307	3	8	8	78	17	13	8	41	222	60	197	8	13
OTU1351	Primary:Bacteria;Phylum:Bacillota;Class:Clostridia;Order:Eubacteriales;Family:Oscillospiraceae;Genus:Butyricicoccus;Species:Butyricicoccus_pullicaecorum;	2	0	7	0	7	0	0	12	0	0	0	0	4	0	0	0	0	0	1	0	0	0	11	1	0	0	1	2	0	0	0	0	2	0	1	0	3	1	0	3
OTU1354	Primary:Bacteria;Phylum:Bacteroidota;Class:Bacteroidia;Order:Bacteroidales;Family:Muribaculaceae;Genus:Muribaculum;Species:NA;	0	0	0	0	0	0	0	0	0	0	0	0	0	0	0	0	0	0	0	0	0	0	0	0	0	0	0	0	0	0	0	0	0	0	0	0	0	0	0	0
OTU1356	Primary:Bacteria;Phylum:Bacillota;Class:Clostridia;Order:Eubacteriales;Family:Lachnospiraceae;Genus:NA;Species:NA;	0	2	1	1	11	0	0	2	0	1	0	1	1	2	3	2	1	0	1	0	3	0	0	0	0	0	1	0	0	1	2	1	3	1	3	0	0	0	0	0
OTU1359	Primary:Bacteria;Phylum:Bacteroidota;Class:Bacteroidia;Order:Bacteroidales;Family:Muribaculaceae;Genus:Muribaculum;Species:NA;	0	0	0	0	0	0	0	0	0	0	0	0	0	0	0	0	0	0	0	0	0	0	0	0	0	0	0	0	0	0	0	0	0	0	0	0	0	0	0	0
OTU136	Primary:Bacteria;Phylum:Bacillota;Class:Clostridia;Order:Eubacteriales;Family:Oscillospiraceae;Genus:NA;Species:NA;	11	6	38	6	20	0	6	20	16	3	28	66	3	36	4	19	4	52	20	16	0	3	6	0	0	1	11	11	1	13	64	25	8	5	16	1	44	33	3	113
OTU1363	Primary:Bacteria;Phylum:Bacillota;Class:Clostridia;Order:Eubacteriales;Family:Lachnospiraceae;Genus:NA;Species:NA;	4	5	21	3	6	3	5	2	12	12	20	18	3	0	5	3	3	7	12	4	3	12	2	1	6	11	7	5	5	10	5	5	12	6	2	9	3	3	0	8
OTU1365	Primary:Bacteria;Phylum:Bacillota;Class:Clostridia;Order:Eubacteriales;Family:NA;Genus:NA;Species:NA;	11	2	0	20	1	29	7	1	4	2	1	2	4	23	2	18	14	1	1	0	1	5	2	4	4	4	2	0	1	1	6	1	5	12	1	11	1	0	0	8
OTU1367	Primary:Bacteria;Phylum:Spirochaetota;Class:Spirochaetia;Order:Spirochaetales;Family:Treponemataceae;Genus:Treponema;Species:Treponema_succinifaciens;	0	0	0	0	0	0	0	0	0	0	0	0	0	0	0	0	0	0	0	0	0	0	0	0	0	0	0	0	0	0	0	0	0	0	0	0	0	0	0	0
OTU1369	Primary:Bacteria;Phylum:NA;Class:NA;Order:NA;Family:NA;Genus:NA;Species:NA;	0	0	0	0	0	0	0	0	0	0	0	0	0	0	0	0	0	0	0	0	0	0	0	0	0	0	0	0	0	0	0	0	0	0	0	0	0	0	0	0
OTU137	Primary:Bacteria;Phylum:Bacillota;Class:NA;Order:NA;Family:NA;Genus:NA;Species:NA;	14	0	0	63	9	17	2	2	2	7	4	33	0	0	0	1	5	4	0	0	0	50	3	22	8	3	38	2	30	0	5	4	8	5	11	12	43	66	10	17
OTU1370	Primary:Bacteria;Phylum:Bacillota;Class:Clostridia;Order:Eubacteriales;Family:Oscillospiraceae;Genus:Vescimonas;Species:NA;	5	7	5	2	3	5	5	4	2	1	1	4	2	2	4	2	1	2	2	4	2	0	0	1	0	0	2	0	1	1	0	0	0	0	0	1	0	0	1	0
OTU1372	Primary:Bacteria;Phylum:Bacillota;Class:Clostridia;Order:Eubacteriales;Family:Lachnospiraceae;Genus:Sellimonas;Species:Sellimonas_monacensis;	21	25	25	60	50	23	63	27	30	27	30	22	63	55	31	7	86	48	76	13	109	12	41	25	48	26	76	57	33	27	54	24	62	108	2	12	17	56	5	8
OTU1373	Primary:Bacteria;Phylum:Bacillota;Class:Clostridia;Order:Eubacteriales;Family:NA;Genus:NA;Species:NA;	12	9	16	111	33	37	10	5	13	33	48	13	12	9	1	14	16	48	5	0	20	43	8	99	48	14	26	1	86	6	18	15	20	22	5	59	28	22	2	19
OTU1376	Primary:Bacteria;Phylum:Bacillota;Class:Clostridia;Order:Eubacteriales;Family:Lachnospiraceae;Genus:NA;Species:NA;	1	6	11	2	7	5	12	13	81	4	23	22	7	8	10	0	11	10	6	7	7	9	3	4	1	22	89	4	8	16	24	10	2	1	6	5	7	6	1	6
OTU1377	Primary:Bacteria;Phylum:Bacillota;Class:Clostridia;Order:Eubacteriales;Family:NA;Genus:NA;Species:NA;	0	0	1	9	0	7	12	2	0	2	1	0	0	3	0	2	11	4	2	0	3	7	0	10	7	5	1	0	1	7	1	2	1	12	0	9	1	3	1	4
OTU1379	Primary:Bacteria;Phylum:Actinomycetota;Class:Coriobacteriia;Order:Eggerthellales;Family:Eggerthellaceae;Genus:NA;Species:NA;	0	0	0	0	0	0	0	0	0	0	0	0	0	0	0	0	0	0	0	0	0	0	0	0	0	0	0	0	0	0	0	0	0	0	0	0	0	0	0	0
OTU138	Primary:Bacteria;Phylum:Bacillota;Class:Clostridia;Order:Eubacteriales;Family:Oscillospiraceae;Genus:Anaerofilum;Species:Anaerofilum_hominis;	16	27	64	20	64	16	11	22	85	54	100	64	44	53	19	164	19	59	11	16	19	27	29	8	10	10	20	8	5	23	17	46	17	31	12	48	9	12	4	50
OTU1381	Primary:Bacteria;Phylum:Bacillota;Class:Clostridia;Order:Eubacteriales;Family:Lachnospiraceae;Genus:NA;Species:NA;	1	2	7	3	1	2	7	0	9	2	6	2	1	6	0	2	1	3	17	1	0	9	2	6	2	5	6	0	2	20	3	11	6	17	1	8	31	9	2	16
OTU1382	Primary:Bacteria;Phylum:Bacillota;Class:Clostridia;Order:Eubacteriales;Family:Lachnospiraceae;Genus:NA;Species:NA;	1	3	0	7	0	2	3	3	0	3	1	2	0	1	3	2	2	0	1	4	0	0	0	0	0	0	0	1	0	0	0	0	0	0	0	0	1	0	0	0
OTU1385	Primary:Bacteria;Phylum:Bacillota;Class:Clostridia;Order:Eubacteriales;Family:Lachnospiraceae;Genus:NA;Species:NA;	3	1	2	1	2	3	8	1	2	5	0	0	6	8	3	2	9	3	17	0	9	5	9	6	9	3	21	0	3	6	5	3	10	8	0	0	0	5	1	4
OTU1386	Primary:Bacteria;Phylum:Bacteroidota;Class:Bacteroidia;Order:Bacteroidales;Family:Muribaculaceae;Genus:Duncaniella;Species:Duncaniella_freteri;	0	0	0	0	0	0	0	0	0	0	0	0	0	0	0	0	0	0	0	0	0	0	0	0	0	0	0	0	0	0	0	0	0	0	0	0	0	0	0	0
OTU1387	Primary:Bacteria;Phylum:Bacillota;Class:Clostridia;Order:Eubacteriales;Family:Lachnospiraceae;Genus:NA;Species:NA;	17	12	13	7	6	1	79	4	19	32	15	1	10	6	11	2	17	3	7	8	12	1	16	5	1	4	2	4	9	4	9	0	6	8	1	1	4	8	0	1
OTU1388	Primary:Bacteria;Phylum:Bacillota;Class:Clostridia;Order:Eubacteriales;Family:Lachnospiraceae;Genus:Sellimonas;Species:Sellimonas_catena;	346	72	78	25	30	18	41	141	21	36	15	15	61	30	140	28	48	34	47	104	97	20	178	24	19	17	66	113	25	37	39	27	35	54	3	17	22	44	5	10
OTU1389	Primary:Bacteria;Phylum:Bacteroidota;Class:Bacteroidia;Order:Bacteroidales;Family:NA;Genus:NA;Species:NA;	0	0	0	0	0	0	1	0	0	0	0	1	0	0	0	0	0	0	0	0	0	0	0	0	0	0	0	0	0	1	0	0	0	0	0	1	0	0	0	0
OTU139	Primary:Bacteria;Phylum:Bacillota;Class:Bacilli;Order:Lactobacillales;Family:Streptococcaceae;Genus:Streptococcus;Species:NA;	15	10	26	49	4	4	16	0	4	62	2	1	0	2	1	0	11	6	1	5	4	2	1	2	0	54	13	1	59	21	1	4	2	5	2	18	2	5	4	3
OTU1390	Primary:Bacteria;Phylum:Bacillota;Class:Clostridia;Order:Eubacteriales;Family:NA;Genus:NA;Species:NA;	0	4	2	0	3	0	4	2	0	1	1	13	0	3	5	0	2	6	11	1	0	1	8	0	1	1	3	1	1	0	1	1	9	1	1	1	2	5	0	1
OTU1391	Primary:Bacteria;Phylum:Bacillota;Class:Clostridia;Order:Eubacteriales;Family:Oscillospiraceae;Genus:Fournierella;Species:Fournierella_massiliensis;	0	2	2	2	0	0	3	1	2	2	0	0	5	0	0	0	0	1	0	1	0	0	0	0	0	1	0	0	0	0	0	0	1	1	0	0	0	0	4	0
OTU1394	Primary:Bacteria;Phylum:Bacillota;Class:Clostridia;Order:Eubacteriales;Family:NA;Genus:NA;Species:NA;	5	2	10	11	27	14	0	7	10	11	33	2	9	4	1	13	5	71	0	0	4	31	6	8	27	6	24	3	40	10	34	32	32	27	1	25	15	14	4	19
OTU1395	Primary:Bacteria;Phylum:Bacillota;Class:Clostridia;Order:Eubacteriales;Family:NA;Genus:NA;Species:NA;	339	312	213	598	137	191	228	99	244	161	139	159	57	276	154	215	213	404	188	11	444	213	194	575	301	208	192	29	186	68	253	194	190	337	27	245	103	218	25	97
OTU1399	Primary:Bacteria;Phylum:Bacillota;Class:Clostridia;Order:Eubacteriales;Family:Lachnospiraceae;Genus:NA;Species:NA;	0	0	13	0	2	2	1	2	5	1	0	2	0	1	0	2	0	0	0	0	0	2	0	6	5	3	1	0	14	0	0	2	1	1	1	2	0	1	1	9
OTU14	Primary:Bacteria;Phylum:NA;Class:NA;Order:NA;Family:NA;Genus:NA;Species:NA;	129	46	0	197	15	41	11	73	117	47	148	208	54	7	129	69	56	12	33	14	23	38	33	195	36	9	110	16	4	11	491	63	19	289	9	108	625	18	17	830
OTU140	Primary:Bacteria;Phylum:Bacillota;Class:Clostridia;Order:Eubacteriales;Family:Peptostreptococcaceae;Genus:Romboutsia;Species:Romboutsia_timonensis;	22	53	22	17	29	26	31	13	43	44	38	28	12	35	38	47	8	56	21	18	78	10	3	3	4	68	7	1	1	36	8	12	1	16	12	9	5	11	6	3
OTU1400	Primary:Bacteria;Phylum:Bacillota;Class:Clostridia;Order:Eubacteriales;Family:Oscillospiraceae;Genus:NA;Species:NA;	4	3	8	60	0	19	3	5	0	4	0	4	3	0	0	17	4	4	1	0	0	24	0	36	7	0	1	45	0	0	1	27	9	3	4	102	26	2	0	0
OTU1402	Primary:Bacteria;Phylum:Bacillota;Class:Clostridia;Order:Eubacteriales;Family:Lachnospiraceae;Genus:NA;Species:NA;	0	0	0	0	0	0	0	0	0	0	0	0	0	0	0	0	0	0	0	0	0	0	0	0	0	0	0	0	0	0	0	0	0	0	0	0	0	0	0	0
OTU1403	Primary:Bacteria;Phylum:Bacillota;Class:Bacilli;Order:Lactobacillales;Family:Streptococcaceae;Genus:Streptococcus;Species:Streptococcus_suis;	0	0	0	0	0	0	0	0	0	0	0	0	0	0	0	0	0	0	0	0	0	0	0	0	0	0	0	0	0	0	0	0	0	0	0	0	0	0	0	0
OTU1404	Primary:Bacteria;Phylum:Bacteroidota;Class:Bacteroidia;Order:Bacteroidales;Family:NA;Genus:NA;Species:NA;	0	0	0	0	0	0	0	0	0	0	0	0	0	0	0	0	0	0	0	0	0	0	0	0	0	0	0	0	0	0	0	0	0	0	0	0	0	0	0	0
OTU1406	Primary:Bacteria;Phylum:Bacteroidota;Class:Bacteroidia;Order:Bacteroidales;Family:Muribaculaceae;Genus:Duncaniella;Species:NA;	0	0	0	0	0	0	0	0	0	0	0	0	0	0	0	0	0	0	0	0	0	0	0	0	0	0	0	0	0	0	0	0	0	0	0	0	0	0	0	0
OTU1407	Primary:Bacteria;Phylum:Bacillota;Class:Negativicutes;Order:NA;Family:NA;Genus:NA;Species:NA;	0	0	0	0	1	0	0	4	0	0	1	0	0	0	0	0	0	0	0	1	1	1	3	3	1	0	0	0	2	1	1	1	0	0	0	0	0	0	0	0
OTU1408	Primary:Bacteria;Phylum:Bacteroidota;Class:Bacteroidia;Order:Bacteroidales;Family:Rikenellaceae;Genus:Alistipes;Species:NA;	0	0	0	0	0	0	0	0	0	0	0	0	0	0	0	0	0	0	0	0	0	0	0	0	0	0	0	0	0	0	0	0	0	0	0	0	0	0	0	0
OTU1409	Primary:Bacteria;Phylum:Bacillota;Class:Clostridia;Order:Eubacteriales;Family:Oscillospiraceae;Genus:Oscillibacter;Species:Oscillibacter_valericigenes;	0	0	0	0	0	0	0	0	0	0	0	0	0	0	0	0	0	0	0	0	0	0	0	0	0	0	0	0	0	0	0	0	0	0	0	0	0	0	0	0
OTU141	Primary:Bacteria;Phylum:Bacillota;Class:Erysipelotrichia;Order:Erysipelotrichales;Family:Erysipelotrichaceae;Genus:NA;Species:NA;	49	6	4	35	9	14	22	20	42	36	47	2	50	1	1	141	40	16	1	0	41	35	5	6	20	22	15	2	40	17	11	2	11	22	2	18	5	30	1	8
OTU1410	Primary:Bacteria;Phylum:Bacillota;Class:Clostridia;Order:Eubacteriales;Family:Oscillospiraceae;Genus:NA;Species:NA;	2	2	6	0	0	0	0	6	3	3	6	2	3	2	4	8	1	2	15	2	0	0	0	3	0	0	8	0	0	2	12	77	1	5	1	16	11	0	1	8
OTU1412	Primary:Bacteria;Phylum:Bacillota;Class:Clostridia;Order:Eubacteriales;Family:NA;Genus:NA;Species:NA;	7	0	4	5	4	7	5	5	6	2	3	3	6	2	5	0	6	7	0	0	23	7	3	2	4	6	7	1	10	4	3	1	3	4	0	2	5	4	1	1
OTU1413	Primary:Bacteria;Phylum:Bacteroidota;Class:Bacteroidia;Order:Bacteroidales;Family:Muribaculaceae;Genus:Muribaculum;Species:NA;	0	0	0	0	0	0	0	0	0	0	0	0	0	0	0	0	0	0	0	0	0	0	0	0	0	0	0	0	0	0	0	0	0	0	0	0	0	0	0	0
OTU1414	Primary:Bacteria;Phylum:Bacillota;Class:Clostridia;Order:Eubacteriales;Family:Lachnospiraceae;Genus:NA;Species:NA;	3	3	9	13	10	17	17	16	13	15	22	18	17	20	12	7	37	10	7	3	25	10	10	4	6	23	17	6	25	13	10	1	9	6	0	15	4	12	0	31
OTU1415	Primary:Bacteria;Phylum:Bacteroidota;Class:Bacteroidia;Order:Bacteroidales;Family:Prevotellaceae;Genus:NA;Species:NA;	0	0	0	0	0	0	0	0	0	0	0	0	0	0	0	0	0	0	0	0	0	0	0	0	0	0	0	0	0	0	0	0	0	0	0	0	0	0	0	0
OTU1416	Primary:Bacteria;Phylum:Bacillota;Class:Clostridia;Order:Eubacteriales;Family:Lachnospiraceae;Genus:Laedolimicola;Species:Laedolimicola_ammoniilytica;	0	1	0	0	1	0	2	0	2	0	2	0	1	0	0	2	0	0	0	1	1	1	1	0	0	2	1	0	6	0	1	1	2	0	0	1	6	3	0	1
OTU1418	Primary:Bacteria;Phylum:Bacteroidota;Class:Bacteroidia;Order:Bacteroidales;Family:Muribaculaceae;Genus:Duncaniella;Species:Duncaniella_muris;	0	0	0	0	0	0	0	0	0	0	0	0	0	0	0	0	0	0	0	0	0	0	0	0	0	0	0	0	0	0	0	0	0	0	0	0	0	0	0	0
OTU142	Primary:Bacteria;Phylum:Bacillota;Class:Erysipelotrichia;Order:Erysipelotrichales;Family:Erysipelotrichaceae;Genus:Holdemania;Species:Holdemania_filiformis;	7	1	17	12	1	6	52	26	39	25	23	51	21	22	40	4	19	7	49	34	1	23	12	17	9	16	22	2	1	14	21	25	8	7	4	9	38	7	1	24
OTU1420	Primary:Bacteria;Phylum:Bacillota;Class:Clostridia;Order:Eubacteriales;Family:NA;Genus:NA;Species:NA;	0	0	0	0	0	0	0	1	0	0	0	0	0	1	0	0	0	1	0	0	0	0	0	0	0	0	1	0	1	0	0	0	0	1	0	0	0	2	0	0
OTU1423	Primary:Bacteria;Phylum:Bacillota;Class:Clostridia;Order:Eubacteriales;Family:NA;Genus:NA;Species:NA;	0	0	0	3	0	1	1	0	2	0	0	0	0	0	0	0	0	1	0	0	0	0	0	1	0	0	1	0	0	0	0	0	1	0	0	0	0	1	0	0
OTU1426	Primary:Bacteria;Phylum:Bacillota;Class:Clostridia;Order:Eubacteriales;Family:Lachnospiraceae;Genus:NA;Species:NA;	0	0	1	0	0	0	0	0	0	0	0	0	0	1	0	0	0	0	0	0	0	0	0	0	1	0	0	0	0	0	1	0	0	0	0	0	0	0	0	0
OTU1427	Primary:Bacteria;Phylum:Bacillota;Class:Clostridia;Order:Eubacteriales;Family:Oscillospiraceae;Genus:NA;Species:NA;	0	0	1	0	0	0	0	0	0	0	0	0	1	1	0	0	1	1	0	0	0	0	0	0	0	0	0	0	0	1	1	0	0	0	0	0	1	0	0	0
OTU143	Primary:Bacteria;Phylum:Bacteroidota;Class:Bacteroidia;Order:Bacteroidales;Family:Prevotellaceae;Genus:NA;Species:NA;	0	0	0	0	0	0	0	0	0	8	0	23	0	0	0	0	1	1	0	0	0	8	0	0	1	2	2	0	0	0	3	3	1	0	1	1	20	4	366	5
OTU1432	Primary:Bacteria;Phylum:Lentisphaerota;Class:Lentisphaeria;Order:Victivallales;Family:Victivallaceae;Genus:Victivallis;Species:Victivallis_vadensis;	0	0	0	0	0	0	0	0	0	0	0	0	0	0	0	0	0	0	0	0	0	0	0	0	0	0	0	0	0	0	0	0	0	0	0	0	0	0	0	0
OTU1433	Primary:Bacteria;Phylum:Bacillota;Class:Clostridia;Order:Eubacteriales;Family:NA;Genus:NA;Species:NA;	0	0	0	0	0	0	0	0	1	0	1	3	1	0	0	1	0	1	0	0	0	1	0	0	0	0	0	0	0	0	2	3	0	0	0	1	0	2	2	1
OTU1436	Primary:Bacteria;Phylum:Bacillota;Class:NA;Order:NA;Family:NA;Genus:NA;Species:NA;	0	1	1	4	1	8	3	0	2	3	2	0	1	1	0	0	0	0	0	0	1	3	0	7	1	1	1	0	0	0	1	0	1	2	0	1	1	2	0	3
OTU1437	Primary:Bacteria;Phylum:Bacillota;Class:Clostridia;Order:Eubacteriales;Family:NA;Genus:NA;Species:NA;	5	1	0	5	1	7	8	1	2	1	5	0	5	2	5	2	1	8	1	1	7	5	5	2	11	6	8	1	7	3	4	2	2	10	1	4	0	5	1	6
OTU1438	Primary:Bacteria;Phylum:Bacillota;Class:Clostridia;Order:Eubacteriales;Family:Oscillospiraceae;Genus:NA;Species:NA;	3	0	0	5	0	5	1	2	1	0	3	1	3	4	5	2	0	0	6	0	30	5	1	5	2	2	3	0	6	12	4	1	4	1	0	8	7	5	0	7
OTU144	Primary:Bacteria;Phylum:NA;Class:NA;Order:NA;Family:NA;Genus:NA;Species:NA;	0	1	0	0	2	1	1	1	0	1	0	2	1	0	0	3	2	3	0	0	4	15	73	16	28	17	24	16	65	10	5	8	12	26	8	7	27	11	12	6
OTU1440	Primary:Bacteria;Phylum:Bacillota;Class:Clostridia;Order:Eubacteriales;Family:Oscillospiraceae;Genus:NA;Species:NA;	0	0	0	0	0	0	0	0	1	1	2	5	0	1	0	1	1	2	0	0	0	0	0	0	0	1	0	0	0	1	7	5	3	0	0	1	4	5	0	0
OTU1441	Primary:Bacteria;Phylum:Bacillota;Class:Clostridia;Order:Eubacteriales;Family:Lachnospiraceae;Genus:Sellimonas;Species:Sellimonas_monacensis;	0	0	2	0	0	0	0	0	0	0	1	2	1	0	0	2	1	0	0	0	0	0	0	1	0	0	0	3	0	1	2	1	2	0	1	0	2	0	1	0
OTU1442	Primary:Bacteria;Phylum:Bacillota;Class:Erysipelotrichia;Order:Erysipelotrichales;Family:Erysipelotrichaceae;Genus:NA;Species:NA;	0	0	0	0	0	0	0	0	0	0	0	0	0	0	0	0	0	0	0	0	0	0	0	0	0	0	0	0	0	0	0	0	0	0	0	0	0	0	0	0
OTU1443	Primary:Bacteria;Phylum:Bacillota;Class:Clostridia;Order:Eubacteriales;Family:NA;Genus:NA;Species:NA;	1	0	0	6	2	4	1	0	1	3	3	2	0	0	2	0	0	4	0	0	6	6	1	6	4	0	1	0	2	1	0	0	0	2	1	1	1	0	0	4
OTU1445	Primary:Bacteria;Phylum:NA;Class:NA;Order:NA;Family:NA;Genus:NA;Species:NA;	0	0	0	0	0	0	0	0	0	0	0	0	0	0	0	0	0	0	0	0	0	0	0	0	0	0	0	0	0	0	0	0	0	0	0	0	0	0	0	0
OTU1446	Primary:Bacteria;Phylum:Bacillota;Class:Clostridia;Order:Eubacteriales;Family:Oscillospiraceae;Genus:NA;Species:NA;	0	0	1	0	1	0	0	0	1	0	0	3	0	1	1	0	1	2	0	1	0	0	1	0	0	0	0	0	0	0	0	0	1	1	0	0	0	0	0	1
OTU1447	Primary:Bacteria;Phylum:Bacillota;Class:Clostridia;Order:Eubacteriales;Family:Oscillospiraceae;Genus:Dysosmobacter;Species:Dysosmobacter_welbionis;	2	0	1	0	2	0	1	2	4	0	2	1	1	3	5	1	0	4	8	2	0	0	1	0	0	0	0	2	0	0	1	0	0	0	0	0	0	1	0	2
OTU145	Primary:Bacteria;Phylum:Pseudomonadota;Class:Gammaproteobacteria;Order:Aeromonadales;Family:Succinivibrionaceae;Genus:Succinatimonas;Species:Succinatimonas_hippei;	29	68	3	4	22	1	1	222	5	9	2	8	4	0	19	8	2	2	0	162	0	3	19	5	0	17	0	31	17	1	1	1	2	0	78	0	0	1	35	3
OTU1450	Primary:Bacteria;Phylum:NA;Class:NA;Order:NA;Family:NA;Genus:NA;Species:NA;	0	0	0	0	0	0	0	0	0	0	0	0	0	0	0	0	0	0	0	0	0	0	0	0	0	0	0	0	0	0	0	0	0	0	0	0	0	0	0	0
OTU1452	Primary:Bacteria;Phylum:Bacillota;Class:Clostridia;Order:Eubacteriales;Family:Oscillospiraceae;Genus:NA;Species:NA;	0	1	4	5	1	11	0	7	8	4	12	16	1	0	1	36	0	4	1	2	1	0	1	3	3	2	6	0	0	2	6	14	2	11	1	13	10	4	0	14
OTU1457	Primary:Bacteria;Phylum:Bacillota;Class:Clostridia;Order:Eubacteriales;Family:Lachnospiraceae;Genus:Anthropogastromicrobium;Species:Anthropogastromicrobium_aceti;	0	0	0	0	0	1	1	2	1	0	0	1	1	1	0	1	2	0	1	0	0	2	1	0	1	0	1	0	0	1	1	3	2	1	0	1	1	2	0	1
OTU1459	Primary:Bacteria;Phylum:Bacillota;Class:Clostridia;Order:Eubacteriales;Family:Oscillospiraceae;Genus:Anaeromassilibacillus;Species:Anaeromassilibacillus_senegalensis;	3	5	18	0	1	0	11	6	16	2	11	9	11	15	2	2	3	7	6	0	0	1	1	2	0	4	3	1	0	3	2	5	5	0	1	14	1	3	0	6
OTU146	Primary:Bacteria;Phylum:Bacteroidota;Class:Bacteroidia;Order:Bacteroidales;Family:Porphyromonadaceae;Genus:NA;Species:NA;	0	0	0	46	1	0	1	0	11	1	7	2	1	0	0	0	0	2	0	1	1	8	3	2	2	4	1	0	0	14	25	4	4	1	801	1	16	3	217	2
OTU1464	Primary:Bacteria;Phylum:Bacillota;Class:Clostridia;Order:Eubacteriales;Family:Oscillospiraceae;Genus:Paludihabitans;Species:Paludihabitans_psychrotolerans;	0	0	5	0	3	1	6	3	0	14	4	15	0	2	0	0	0	0	4	2	3	4	0	0	0	1	0	0	2	1	1	0	19	0	0	0	5	2	0	2
OTU1465	Primary:Bacteria;Phylum:Bacillota;Class:Clostridia;Order:Eubacteriales;Family:Lachnospiraceae;Genus:NA;Species:NA;	23	9	5	28	7	13	11	11	14	11	12	13	7	12	15	7	18	14	25	10	14	19	29	23	14	4	9	2	11	12	3	7	19	20	1	6	12	31	1	15
OTU1467	Primary:Bacteria;Phylum:Bacillota;Class:Erysipelotrichia;Order:Erysipelotrichales;Family:Erysipelotrichaceae;Genus:Traorella;Species:Traorella_massiliensis;	0	0	0	0	0	0	0	0	0	0	0	0	0	0	0	0	0	0	0	0	0	0	0	0	0	0	0	0	0	0	0	0	0	0	0	0	0	0	0	0
OTU1468	Primary:Bacteria;Phylum:Bacillota;Class:Clostridia;Order:Eubacteriales;Family:NA;Genus:NA;Species:NA;	0	0	0	0	0	0	0	0	0	0	0	0	0	0	0	0	0	0	0	0	0	0	0	0	0	0	0	0	0	0	0	0	0	0	0	0	0	0	0	0
OTU1469	Primary:Bacteria;Phylum:Actinomycetota;Class:Actinobacteria;Order:Mycobacteriales;Family:NA;Genus:NA;Species:NA;	0	0	0	0	0	0	0	0	0	0	0	0	0	0	0	0	0	0	0	0	0	0	0	0	0	0	0	0	0	0	0	0	0	0	0	0	0	0	0	0
OTU147	Primary:Bacteria;Phylum:NA;Class:NA;Order:NA;Family:NA;Genus:NA;Species:NA;	309	179	4	3	100	8	5	29	23	24	0	33	12	1	328	3	2	3	2	199	3	17	72	14	5	32	0	32	3	2	5	4	3	0	74	12	7	1	197	4
OTU1472	Primary:Bacteria;Phylum:Bacillota;Class:Clostridia;Order:Eubacteriales;Family:NA;Genus:NA;Species:NA;	1	1	2	24	3	43	19	0	1	6	3	1	0	17	1	4	14	8	0	0	2	16	3	17	21	1	6	1	2	5	5	5	1	24	0	8	3	2	1	5
OTU1473	Primary:Bacteria;Phylum:Bacillota;Class:Clostridia;Order:Eubacteriales;Family:Lachnospiraceae;Genus:NA;Species:NA;	0	0	0	2	1	1	3	1	2	5	1	0	0	2	2	1	7	1	7	0	1	0	0	2	2	3	0	1	1	4	2	0	3	5	0	3	5	2	0	2
OTU1474	Primary:Bacteria;Phylum:Bacillota;Class:Clostridia;Order:Eubacteriales;Family:Lachnospiraceae;Genus:NA;Species:NA;	7	2	15	13	18	13	10	7	5	2	26	21	10	11	6	8	6	15	24	0	36	18	8	9	12	50	14	2	76	13	29	26	11	9	1	23	18	30	2	7
OTU1479	Primary:Bacteria;Phylum:Bacillota;Class:Clostridia;Order:Eubacteriales;Family:NA;Genus:NA;Species:NA;	0	0	0	0	0	0	0	0	0	0	0	0	0	0	0	0	0	0	0	0	0	0	0	0	0	0	0	0	0	0	0	0	0	0	0	0	0	0	0	0
OTU148	Primary:Bacteria;Phylum:Bacteroidota;Class:Bacteroidia;Order:Bacteroidales;Family:Bacteroidaceae;Genus:Phocaeicola;Species:Phocaeicola_salanitronis;	150	120	0	5	269	0	4	24	7	3	2	48	47	0	211	0	1	18	1	225	0	12	188	8	3	11	4	443	21	2	0	0	1	0	39	2	5	0	72	0
OTU1480	Primary:Bacteria;Phylum:Bacillota;Class:Clostridia;Order:Eubacteriales;Family:Oscillospiraceae;Genus:Gemmiger;Species:Gemmiger_gallinarum;	0	0	0	0	0	0	1	0	0	0	0	0	0	0	2	0	1	0	0	0	3	0	0	0	8	0	1	0	0	0	1	0	0	0	0	0	0	0	0	0
OTU1485	Primary:Bacteria;Phylum:Bacillota;Class:Clostridia;Order:Eubacteriales;Family:Oscillospiraceae;Genus:Lawsonibacter;Species:NA;	5	11	1	0	18	0	0	6	3	1	0	3	1	2	11	3	0	1	2	18	0	0	3	1	0	2	1	3	1	0	1	2	1	0	11	0	8	3	5	7
OTU149	Primary:Bacteria;Phylum:Bacillota;Class:NA;Order:NA;Family:NA;Genus:NA;Species:NA;	0	35	1	9	0	6	32	5	18	15	10	14	5	12	0	12	8	5	0	4	1	40	40	6	4	14	1	5	3	78	5	0	4	15	5	60	12	22	3	10
OTU1490	Primary:Bacteria;Phylum:Bacillota;Class:Clostridia;Order:Eubacteriales;Family:Oscillospiraceae;Genus:NA;Species:NA;	0	1	0	0	1	0	0	7	0	0	1	0	0	1	1	2	0	0	0	3	0	0	3	0	0	0	0	1	0	0	3	2	0	0	4	0	0	0	0	2
OTU1491	Primary:Bacteria;Phylum:Bacteroidota;Class:Bacteroidia;Order:Bacteroidales;Family:Bacteroidaceae;Genus:Mediterranea;Species:Mediterranea_massiliensis;	0	0	0	0	0	0	0	0	0	0	0	0	0	0	0	0	0	0	0	0	0	0	0	0	0	0	0	0	0	0	0	0	0	0	0	0	0	0	0	0
OTU1492	Primary:Bacteria;Phylum:Bacillota;Class:Clostridia;Order:Eubacteriales;Family:NA;Genus:NA;Species:NA;	1	18	0	0	3	0	0	2	6	0	0	0	0	0	0	0	0	2	0	0	0	1	1	2	0	0	1	0	0	1	0	1	0	0	38	1	0	0	0	0
OTU1495	Primary:Bacteria;Phylum:Bacillota;Class:Clostridia;Order:Eubacteriales;Family:NA;Genus:NA;Species:NA;	2	2	0	3	0	1	1	1	4	1	0	2	0	6	2	12	2	0	2	0	4	1	0	0	5	0	2	0	0	2	2	3	2	7	0	3	2	9	1	6
OTU1496	Primary:Bacteria;Phylum:Bacillota;Class:Clostridia;Order:Eubacteriales;Family:Oscillospiraceae;Genus:NA;Species:NA;	3	25	56	4	31	1	8	14	4	4	10	5	13	0	10	93	6	15	3	0	1	2	1	2	0	0	2	2	0	9	0	14	3	1	0	20	10	7	3	18
OTU1497	Primary:Bacteria;Phylum:Bacillota;Class:NA;Order:NA;Family:NA;Genus:NA;Species:NA;	0	0	0	0	0	0	0	0	0	0	0	0	0	0	0	0	0	0	0	0	0	0	0	0	0	0	0	0	0	0	0	0	0	0	0	0	0	0	0	0
OTU1498	Primary:Bacteria;Phylum:Synergistota;Class:Synergistia;Order:Synergistales;Family:Synergistaceae;Genus:Cloacibacillus;Species:Cloacibacillus_porcorum;	1	0	0	1	0	1	0	1	0	0	0	0	0	0	0	1	0	0	0	0	3	1	1	1	0	0	0	0	0	1	0	1	1	1	0	0	0	0	0	0
OTU15	Primary:Bacteria;Phylum:Bacillota;Class:Clostridia;Order:Eubacteriales;Family:NA;Genus:NA;Species:NA;	168	19	138	725	18	53	112	19	85	38	733	0	4	8	1	135	45	190	2	11	183	23	59	1428	111	18	171	7	491	57	117	311	202	403	58	780	229	207	19	122
OTU150	Primary:Bacteria;Phylum:Bacillota;Class:Clostridia;Order:Eubacteriales;Family:Oscillospiraceae;Genus:Dysosmobacter;Species:Dysosmobacter_hominis;	99	83	132	15	126	6	31	77	45	19	66	18	55	64	147	66	9	92	173	146	2	7	54	0	3	14	6	36	5	10	51	11	38	7	79	6	27	36	22	71
OTU1501	Primary:Bacteria;Phylum:Bacillota;Class:Clostridia;Order:Eubacteriales;Family:Oscillospiraceae;Genus:NA;Species:NA;	0	0	0	0	0	0	0	0	0	0	0	0	0	0	0	0	0	0	0	0	0	0	0	0	0	0	0	0	0	0	0	0	0	0	0	0	0	0	0	0
OTU1502	Primary:Bacteria;Phylum:Bacillota;Class:Clostridia;Order:Eubacteriales;Family:Oscillospiraceae;Genus:NA;Species:NA;	0	0	1	1	0	3	0	2	1	0	0	0	0	0	0	3	0	1	0	0	0	1	0	0	0	0	0	0	0	1	1	3	0	1	0	0	1	0	0	0
OTU1503	Primary:Bacteria;Phylum:Bacillota;Class:Clostridia;Order:Eubacteriales;Family:Oscillospiraceae;Genus:NA;Species:NA;	0	13	5	6	3	18	2	10	1	1	10	10	14	7	4	130	13	2	1	0	37	40	4	8	11	49	3	2	8	8	19	17	4	25	3	18	7	9	3	18
OTU1504	Primary:Bacteria;Phylum:Bacteroidota;Class:Bacteroidia;Order:Bacteroidales;Family:NA;Genus:NA;Species:NA;	0	0	0	0	0	0	0	0	0	0	0	0	0	0	0	0	0	0	0	0	0	0	0	0	0	0	0	0	0	0	0	0	0	0	0	0	0	0	0	0
OTU1505	Primary:Bacteria;Phylum:Bacillota;Class:Clostridia;Order:Eubacteriales;Family:Oscillospiraceae;Genus:NA;Species:NA;	2	3	0	0	1	0	0	0	0	0	0	1	1	0	1	0	1	0	1	2	0	0	1	0	0	1	1	0	0	0	1	1	0	1	1	0	0	1	0	1
OTU1506	Primary:Bacteria;Phylum:Bacillota;Class:Clostridia;Order:Eubacteriales;Family:Oscillospiraceae;Genus:NA;Species:NA;	0	4	1	2	0	0	0	1	4	1	3	0	3	1	1	11	0	1	0	0	0	1	0	1	1	0	1	0	0	3	4	6	0	2	0	7	3	3	0	4
OTU1507	Primary:Bacteria;Phylum:Bacillota;Class:Clostridia;Order:Eubacteriales;Family:Lachnospiraceae;Genus:NA;Species:NA;	10	13	24	20	10	3	43	19	29	15	20	12	38	35	72	4	44	12	31	7	23	8	18	4	1	36	19	2	7	17	26	6	10	7	3	13	8	13	3	32
OTU1508	Primary:Bacteria;Phylum:Bacillota;Class:Clostridia;Order:Eubacteriales;Family:Lachnospiraceae;Genus:Kineothrix;Species:Kineothrix_alysoides;	2	1	0	2	0	2	3	1	1	1	0	1	0	2	0	1	0	2	0	2	1	0	0	0	0	1	0	0	0	0	0	0	0	0	1	2	0	0	0	0
OTU1509	Primary:Bacteria;Phylum:Bacillota;Class:Clostridia;Order:Eubacteriales;Family:Oscillospiraceae;Genus:NA;Species:NA;	4	9	6	4	9	2	5	8	7	1	10	4	6	8	4	12	3	9	0	1	2	12	7	4	1	0	18	1	4	4	13	4	10	4	4	15	5	6	3	3
OTU151	Primary:Bacteria;Phylum:NA;Class:NA;Order:NA;Family:NA;Genus:NA;Species:NA;	0	15	39	0	29	33	156	34	106	28	39	0	15	0	0	100	6	24	0	0	15	66	30	0	26	19	1	5	28	0	0	17	1	0	0	6	2	1	0	7
OTU1510	Primary:Bacteria;Phylum:Bacillota;Class:Clostridia;Order:Eubacteriales;Family:Lachnospiraceae;Genus:NA;Species:NA;	1	1	0	0	1	0	0	0	0	0	0	0	0	0	0	0	0	0	1	0	1	0	0	1	0	0	0	0	0	0	1	0	1	2	3	0	0	0	0	0
OTU1514	Primary:Bacteria;Phylum:Bacillota;Class:Clostridia;Order:Eubacteriales;Family:Lachnospiraceae;Genus:NA;Species:NA;	0	0	0	0	0	0	0	0	0	0	0	0	0	0	0	0	0	0	0	0	0	0	0	0	0	0	0	0	0	0	0	0	0	0	0	0	0	0	0	0
OTU1516	Primary:Bacteria;Phylum:NA;Class:NA;Order:NA;Family:NA;Genus:NA;Species:NA;	0	0	1	0	0	0	0	0	0	0	0	0	0	1	0	0	2	1	0	0	0	0	0	1	0	0	0	0	0	4	2	0	2	4	0	0	2	3	0	1
OTU152	Primary:Bacteria;Phylum:Bacillota;Class:Clostridia;Order:Eubacteriales;Family:Oscillospiraceae;Genus:NA;Species:NA;	15	33	28	1	15	2	33	58	17	84	10	0	119	24	8	3	15	21	0	37	0	1	12	1	2	2	5	12	4	2	23	23	10	3	26	36	79	21	93	18
OTU1521	Primary:Bacteria;Phylum:Bacillota;Class:Clostridia;Order:Eubacteriales;Family:NA;Genus:NA;Species:NA;	0	0	0	0	0	0	0	0	0	0	0	0	0	0	0	0	0	0	0	0	0	0	0	0	0	0	0	0	0	0	0	0	0	0	0	0	0	0	0	0
OTU1527	Primary:Bacteria;Phylum:Bacillota;Class:Clostridia;Order:Eubacteriales;Family:Oscillospiraceae;Genus:NA;Species:NA;	0	0	0	0	0	0	0	0	0	0	0	0	0	0	0	0	0	0	0	0	0	0	0	0	0	0	0	0	0	0	0	0	0	0	0	0	0	0	0	0
OTU1529	Primary:Bacteria;Phylum:Bacillota;Class:Clostridia;Order:Eubacteriales;Family:Oscillospiraceae;Genus:Subdoligranulum;Species:Subdoligranulum_variabile;	0	0	5	0	0	18	3	0	3	0	1	0	0	0	0	0	1	1	0	0	0	2	0	0	0	1	0	0	0	0	2	0	5	1	0	4	9	0	1	2
OTU153	Primary:Bacteria;Phylum:Bacillota;Class:Clostridia;Order:Eubacteriales;Family:Oscillospiraceae;Genus:Gemmiger;Species:Gemmiger_gallinarum;	1	9	69	5	15	7	76	22	3	12	3	1	32	0	0	2	12	5	0	0	26	19	11	1	18	9	25	9	10	87	13	19	2	45	10	4	3	21	51	0
OTU1531	Primary:Bacteria;Phylum:Bacillota;Class:Clostridia;Order:Eubacteriales;Family:NA;Genus:NA;Species:NA;	18	15	9	28	32	128	13	4	3	315	5	5	3	8	1	5	70	176	1	2	8	135	31	36	184	8	11	1	18	3	61	12	13	66	5	17	63	14	8	4
OTU1534	Primary:Bacteria;Phylum:Bacillota;Class:Clostridia;Order:Eubacteriales;Family:Oscillospiraceae;Genus:NA;Species:NA;	0	2	2	1	0	1	2	0	6	0	2	0	1	1	2	0	3	0	2	1	0	0	0	1	0	0	1	0	1	0	0	2	1	0	1	0	3	0	0	1
OTU1535	Primary:Bacteria;Phylum:Bacillota;Class:Clostridia;Order:Eubacteriales;Family:Oscillospiraceae;Genus:NA;Species:NA;	4	0	3	5	1	6	0	1	3	3	5	2	0	10	2	10	1	9	6	0	2	6	1	1	0	2	1	0	0	2	7	8	3	3	0	9	1	2	0	19
OTU1536	Primary:Bacteria;Phylum:Bacillota;Class:Bacillota_incertae_sedis;Order:NA;Family:NA;Genus:Negativibacillus;Species:Negativibacillus_massiliensis;	2	61	9	0	5	1	7	2	6	8	0	0	1	1	3	0	3	1	0	9	0	0	10	1	2	1	2	76	1	1	1	2	1	1	44	1	50	15	56	15
OTU154	Primary:Bacteria;Phylum:Pseudomonadota;Class:Alphaproteobacteria;Order:Rhodospirillales;Family:NA;Genus:NA;Species:NA;	0	0	0	3	0	195	1	7	0	0	0	11	0	0	100	2	2	1	58	0	42	0	0	7	1	3	0	9	0	1	8	9	29	2	23	0	2	71	11	1
OTU1540	Primary:Bacteria;Phylum:NA;Class:NA;Order:NA;Family:NA;Genus:NA;Species:NA;	0	0	0	0	0	0	0	0	0	0	0	0	0	0	0	0	0	0	0	0	0	0	0	0	0	0	0	0	0	0	0	0	0	0	0	0	0	0	0	0
OTU1541	Primary:Bacteria;Phylum:Bacillota;Class:Clostridia;Order:Eubacteriales;Family:Lachnospiraceae;Genus:NA;Species:NA;	0	0	1	1	3	4	0	0	3	2	2	10	0	2	0	2	4	1	0	0	4	5	0	7	0	4	4	0	6	1	3	1	1	3	0	3	1	6	0	3
OTU1543	Primary:Bacteria;Phylum:Bacillota;Class:Clostridia;Order:Eubacteriales;Family:Oscillospiraceae;Genus:NA;Species:NA;	5	5	11	22	11	3	21	20	13	20	4	6	0	4	0	3	1	2	11	2	4	2	20	3	3	2	10	4	2	3	54	50	37	4	12	10	123	107	15	9
OTU1544	Primary:Bacteria;Phylum:Bacillota;Class:NA;Order:NA;Family:NA;Genus:NA;Species:NA;	0	0	0	24	0	1	0	0	0	0	0	0	0	0	0	0	0	11	0	0	0	4	0	0	0	1	0	0	0	0	2	1	3	1	1	5	9	0	0	0
OTU1546	Primary:Bacteria;Phylum:Bacillota;Class:Clostridia;Order:Eubacteriales;Family:Oscillospiraceae;Genus:Lawsonibacter;Species:NA;	0	0	0	0	0	0	0	0	0	0	0	0	0	0	0	0	0	0	0	0	0	0	0	0	0	0	0	0	0	0	0	0	0	0	0	0	0	0	0	0
OTU1547	Primary:Bacteria;Phylum:Bacillota;Class:Clostridia;Order:Eubacteriales;Family:Lachnospiraceae;Genus:Blautia;Species:Blautia_hydrogenotrophica;	0	0	3	0	0	0	0	1	1	1	0	1	3	5	3	6	2	4	2	0	3	0	1	2	0	0	0	1	5	1	2	0	0	0	0	0	0	0	1	0
OTU155	Primary:Bacteria;Phylum:Actinomycetota;Class:Coriobacteriia;Order:Eggerthellales;Family:Eggerthellaceae;Genus:NA;Species:NA;	17	12	14	3	15	17	29	20	7	14	20	4	24	44	40	11	35	22	14	28	11	14	27	8	3	32	6	17	26	3	23	14	11	14	16	11	7	9	6	10
OTU1552	Primary:Bacteria;Phylum:Bacillota;Class:Clostridia;Order:Eubacteriales;Family:Oscillospiraceae;Genus:NA;Species:NA;	0	0	0	0	0	0	0	0	0	0	0	0	0	0	0	0	0	0	0	0	0	0	0	0	0	0	0	0	0	0	0	0	0	0	0	0	0	0	0	0
OTU156	Primary:Bacteria;Phylum:Bacillota;Class:Erysipelotrichia;Order:Erysipelotrichales;Family:Erysipelotrichaceae;Genus:NA;Species:NA;	9	40	24	12	16	114	5	25	1	22	3	11	3	6	25	16	26	30	1	21	56	30	29	4	80	172	84	13	296	0	3	7	3	21	3	9	4	12	6	33
OTU157	Primary:Bacteria;Phylum:Bacillota;Class:Clostridia;Order:Eubacteriales;Family:Lachnospiraceae;Genus:Anaerostipes;Species:Anaerostipes_butyraticus;	117	92	7	16	113	10	23	59	24	16	37	37	64	15	32	10	36	12	16	81	16	13	113	9	6	7	21	89	51	20	75	13	11	22	1	18	26	21	8	30
OTU158	Primary:Bacteria;Phylum:Bacillota;Class:Clostridia;Order:Eubacteriales;Family:Lachnospiraceae;Genus:NA;Species:NA;	1	11	29	11	17	2	11	20	25	8	23	21	11	58	16	10	10	51	41	22	6	5	4	3	0	2	13	13	3	14	10	28	27	18	6	24	27	53	4	14
OTU159	Primary:Bacteria;Phylum:Bacillota;Class:Clostridia;Order:Eubacteriales;Family:NA;Genus:NA;Species:NA;	5	10	2	9	30	18	35	3	27	8	9	11	4	196	0	28	3	100	1	0	79	3	30	18	31	12	6	0	44	87	44	5	2	5	11	1	5	8	2	0
OTU16	Primary:Bacteria;Phylum:Bacillota;Class:Clostridia;Order:Eubacteriales;Family:NA;Genus:NA;Species:NA;	147	95	265	324	477	282	158	522	186	76	338	235	215	263	415	103	189	1123	17	17	221	528	338	236	382	297	591	73	1254	417	1280	1214	760	682	107	402	333	548	45	431
OTU160	Primary:Bacteria;Phylum:Bacillota;Class:Clostridia;Order:Eubacteriales;Family:Oscillospiraceae;Genus:NA;Species:NA;	3	1	0	19	1	0	172	0	1	1	102	118	0	46	0	4	1	1	0	36	0	1	69	3	1	6	26	1	12	1	19	13	117	32	19	1	12	1	0	11
OTU161	Primary:Bacteria;Phylum:Pseudomonadota;Class:Deltaproteobacteria;Order:Desulfovibrionales;Family:Desulfovibrionaceae;Genus:Desulfovibrio;Species:NA;	166	200	7	7	149	3	1	63	71	13	0	8	2	2	39	4	0	1	2	228	0	0	246	2	0	13	3	4	15	3	3	1	1	1	54	1	1	1	57	0
OTU162	Primary:Bacteria;Phylum:Bacillota;Class:Clostridia;Order:Eubacteriales;Family:Oscillospiraceae;Genus:NA;Species:NA;	41	44	19	25	27	10	19	20	33	39	24	61	30	22	44	41	33	39	46	36	24	27	44	18	19	7	31	27	15	30	73	45	54	45	15	34	12	34	5	34
OTU163	Primary:Bacteria;Phylum:NA;Class:NA;Order:NA;Family:NA;Genus:NA;Species:NA;	65	82	1	64	57	24	4	37	16	9	49	138	16	24	44	41	11	5	2	15	80	79	15	228	39	2	10	6	20	146	218	163	71	86	508	25	82	49	11	18
OTU164	Primary:Bacteria;Phylum:Bacteroidota;Class:Bacteroidia;Order:Bacteroidales;Family:Prevotellaceae;Genus:NA;Species:NA;	0	0	0	0	1	0	0	0	0	0	3	3	12	0	0	0	0	0	0	0	23	4	9	35	18	0	5	0	4	9	5	25	5	6	535	21	47	2	301	10
OTU165	Primary:Bacteria;Phylum:Actinomycetota;Class:Coriobacteriia;Order:Coriobacteriales;Family:Coriobacteriaceae;Genus:Collinsella;Species:Collinsella_massiliensis;	9	10	2	8	4	5	9	14	4	27	32	10	49	37	35	3	44	9	42	21	17	6	11	11	7	28	14	7	20	2	12	6	170	6	2	0	0	0	0	12
OTU166	Primary:Bacteria;Phylum:Bacillota;Class:Clostridia;Order:Eubacteriales;Family:Oscillospiraceae;Genus:NA;Species:NA;	24	2	0	0	20	1	0	1	0	0	1	0	0	8	8	5	0	0	0	0	70	5	1	10	0	1	0	1	0	2	1	142	0	84	13	160	2	21	0	18
OTU167	Primary:Bacteria;Phylum:Bacillota;Class:Clostridia;Order:Eubacteriales;Family:Oscillospiraceae;Genus:NA;Species:NA;	13	21	83	10	21	23	74	18	49	40	51	5	81	3	7	20	36	29	6	4	6	22	11	27	1	6	15	5	0	20	52	112	95	16	14	18	114	42	13	15
OTU168	Primary:Bacteria;Phylum:Bacillota;Class:Clostridia;Order:Eubacteriales;Family:Lachnospiraceae;Genus:NA;Species:NA;	29	17	10	18	23	6	19	18	13	31	27	17	24	15	14	19	26	26	25	11	5	21	4	20	1	3	8	1	4	4	55	5	78	17	13	33	33	17	2	30
OTU169	Primary:Bacteria;Phylum:Bacillota;Class:Clostridia;Order:Eubacteriales;Family:Oscillospiraceae;Genus:NA;Species:NA;	11	4	6	25	7	36	13	14	20	16	28	20	16	16	12	10	13	8	2	1	20	22	9	21	23	2	22	1	0	34	21	29	18	18	5	18	14	15	0	10
OTU17	Primary:Bacteria;Phylum:Bacillota;Class:Clostridia;Order:Eubacteriales;Family:Oscillospiraceae;Genus:Fournierella;Species:Fournierella_massiliensis;	19	19	662	13	6	2	65	163	365	148	20	8	633	55	501	5	1140	63	2	61	8	57	147	9	96	231	1275	140	12	4	100	222	62	10	6	9	4	4	188	42
OTU170	Primary:Bacteria;Phylum:Bacillota;Class:Clostridia;Order:Eubacteriales;Family:Oscillospiraceae;Genus:NA;Species:NA;	30	3	35	19	14	18	12	54	2	17	18	2	10	1	4	42	6	8	1	2	14	39	21	4	5	16	1	0	0	2	7	5	1	58	0	14	19	1	14	21
OTU171	Primary:Bacteria;Phylum:Bacillota;Class:Clostridia;Order:Eubacteriales;Family:Oscillospiraceae;Genus:NA;Species:NA;	19	11	45	11	14	6	17	14	7	6	82	33	33	47	6	78	3	49	0	9	3	11	9	1	0	6	96	3	13	5	15	53	16	20	8	50	16	26	3	76
OTU172	Primary:Bacteria;Phylum:Bacillota;Class:Clostridia;Order:Eubacteriales;Family:NA;Genus:NA;Species:NA;	2	83	41	14	28	222	0	21	12	2	3	1	26	0	0	25	0	1	1	1	1	32	0	6	63	1	0	0	13	0	3	1	51	0	0	9	10	2	34	0
OTU173	Primary:Bacteria;Phylum:Bacteroidota;Class:Bacteroidia;Order:Bacteroidales;Family:Rikenellaceae;Genus:Alistipes;Species:Alistipes_shahii;	32	166	2	4	39	12	3	26	60	1	0	4	82	0	151	1	0	4	1	173	2	2	85	4	3	37	2	44	11	0	0	0	0	0	21	0	3	0	58	1
OTU174	Primary:Bacteria;Phylum:Bacillota;Class:Clostridia;Order:Eubacteriales;Family:Eubacteriales;Genus:Aminipila;Species:Aminipila_butyrica;	0	2	0	0	0	0	7	7	20	0	1	0	15	0	0	100	0	2	0	2	0	45	3	89	0	8	3	0	8	10	96	0	0	17	0	57	55	40	0	1
OTU175	Primary:Bacteria;Phylum:Pseudomonadota;Class:Deltaproteobacteria;Order:Desulfovibrionales;Family:Desulfovibrionaceae;Genus:Desulfovibrio;Species:NA;	1	1	0	0	0	0	1	1	0	0	0	2	0	0	0	1	1	0	0	1	0	0	5	0	1	0	0	0	0	2	4	1	3	1	0	0	5	0	0	0
OTU176	Primary:Bacteria;Phylum:Bacillota;Class:Clostridia;Order:Eubacteriales;Family:NA;Genus:NA;Species:NA;	94	38	0	4	20	6	10	129	9	49	1	3	0	0	22	4	0	11	0	152	1	4	143	5	2	16	1	33	12	0	1	3	1	0	28	0	4	6	49	0
OTU177	Primary:Bacteria;Phylum:Pseudomonadota;Class:Betaproteobacteria;Order:Burkholderiales;Family:Sutterellaceae;Genus:Parasutterella;Species:Parasutterella_secunda;	82	186	2	21	128	96	10	70	11	9	0	10	3	1	44	2	1	0	0	30	0	9	76	1	1	8	3	28	3	16	4	2	0	0	50	1	1	1	4	0
OTU178	Primary:Bacteria;Phylum:Bacteroidota;Class:Bacteroidia;Order:Bacteroidales;Family:Rikenellaceae;Genus:Alistipes;Species:Alistipes_inops;	48	62	11	4	89	5	27	132	66	53	25	22	42	30	62	3	9	2	2	12	8	2	36	4	0	7	26	102	2	13	7	15	13	3	88	2	7	0	41	11
OTU179	Primary:Bacteria;Phylum:Bacillota;Class:Clostridia;Order:Eubacteriales;Family:Oscillospiraceae;Genus:NA;Species:NA;	8	8	34	5	9	5	10	9	47	31	91	48	28	15	26	15	19	10	17	5	1	13	6	3	4	7	12	1	10	7	30	9	23	0	3	16	13	50	2	64
OTU18	Primary:Bacteria;Phylum:Bacillota;Class:Clostridia;Order:Eubacteriales;Family:Oscillospiraceae;Genus:Fumia;Species:Fumia_xinanensis;	7	96	57	10	24	12	22	145	57	26	352	372	121	104	25	230	6	290	5	40	5	10	12	26	10	19	42	12	2	160	608	1475	410	64	167	103	500	1033	85	79
OTU180	Primary:Bacteria;Phylum:Bacteroidota;Class:Bacteroidia;Order:Bacteroidales;Family:Bacteroidaceae;Genus:Phocaeicola;Species:Phocaeicola_plebeius;	0	1	0	1	40	0	8	0	12	8	1	10	0	1	15	0	3	10	5	1	4	0	1	16	3	7	0	0	79	4	3	6	1	0	562	0	7	1	517	0
OTU181	Primary:Bacteria;Phylum:Bacillota;Class:Clostridia;Order:Eubacteriales;Family:Lachnospiraceae;Genus:Anaerostipes;Species:NA;	18	26	1	23	12	18	7	154	30	26	15	0	0	0	0	0	2	6	1	0	2	114	17	7	26	12	3	3	0	3	16	4	26	189	15	239	69	42	13	2
OTU182	Primary:Bacteria;Phylum:Bacillota;Class:Clostridia;Order:Eubacteriales;Family:Oscillospiraceae;Genus:Anaerofilum;Species:NA;	25	22	10	13	17	27	43	20	13	23	24	19	13	27	11	14	25	6	8	5	46	17	8	28	45	2	12	6	0	21	8	21	9	22	3	15	16	12	5	8
OTU183	Primary:Bacteria;Phylum:Bacillota;Class:Erysipelotrichia;Order:Erysipelotrichales;Family:Erysipelotrichaceae;Genus:NA;Species:NA;	11	12	1	26	28	7	36	0	17	6	60	0	0	0	0	1	1	1	1	3	0	22	14	35	10	0	0	0	0	9	17	9	19	31	7	3	13	1	1	7
OTU184	Primary:Bacteria;Phylum:Bacillota;Class:Clostridia;Order:NA;Family:NA;Genus:NA;Species:NA;	14	37	52	14	11	5	31	28	42	16	46	12	23	41	11	114	60	20	29	3	5	35	9	8	4	23	8	1	7	14	29	53	11	12	1	31	8	41	3	11
OTU185	Primary:Bacteria;Phylum:Bacteroidota;Class:Bacteroidia;Order:Bacteroidales;Family:Barnesiellaceae;Genus:Barnesiella;Species:Barnesiella_viscericola;	67	97	0	6	40	1	6	71	13	13	2	1	3	0	44	0	1	6	0	124	0	7	87	4	3	0	1	220	2	3	4	1	5	4	24	0	1	0	6	0
OTU186	Primary:Bacteria;Phylum:Bacillota;Class:Clostridia;Order:Eubacteriales;Family:Lachnospiraceae;Genus:Blautia;Species:NA;	95	19	12	22	19	18	4	22	33	19	19	34	8	26	38	28	5	22	54	61	38	30	22	13	24	3	55	13	3	24	11	16	30	45	5	42	34	25	4	33
OTU187	Primary:Bacteria;Phylum:Bacillota;Class:NA;Order:NA;Family:NA;Genus:NA;Species:NA;	23	18	6	93	27	80	10	3	8	22	31	6	3	7	0	17	8	6	0	0	40	24	10	76	24	9	1	3	2	49	15	40	6	5	21	24	23	87	5	37
OTU188	Primary:Bacteria;Phylum:Bacillota;Class:Clostridia;Order:Eubacteriales;Family:Oscillospiraceae;Genus:Ruthenibacterium;Species:Ruthenibacterium_lactatiformans;	10	83	52	18	48	28	11	26	11	6	56	74	57	53	6	55	55	18	65	16	27	27	7	35	21	48	62	1	111	109	178	20	23	10	0	25	24	22	9	23
OTU189	Primary:Bacteria;Phylum:Bacillota;Class:Clostridia;Order:Eubacteriales;Family:NA;Genus:NA;Species:NA;	46	16	13	8	15	8	45	5	20	20	18	19	16	29	42	16	3	11	3	11	33	14	25	7	9	20	6	2	0	4	30	16	17	9	4	1	8	15	0	11
OTU19	Primary:Bacteria;Phylum:Bacillota;Class:Clostridia;Order:Eubacteriales;Family:NA;Genus:NA;Species:NA;	57	6	299	152	314	98	161	144	69	82	142	477	258	113	87	69	33	612	22	5	145	200	36	300	1132	66	90	36	436	44	230	49	38	121	37	49	17	66	24	81
OTU190	Primary:Bacteria;Phylum:Bacillota;Class:Clostridia;Order:Eubacteriales;Family:Oscillospiraceae;Genus:NA;Species:NA;	5	21	11	19	5	14	7	6	44	7	9	14	4	8	23	4	0	8	1	3	139	8	2	9	5	9	5	0	14	2	61	21	0	18	4	6	29	41	1	91
OTU191	Primary:Bacteria;Phylum:Bacillota;Class:NA;Order:NA;Family:NA;Genus:NA;Species:NA;	1	9	6	36	6	30	11	9	7	15	28	36	5	4	1	2	3	4	0	1	8	52	11	23	39	8	12	6	13	11	6	17	13	95	5	21	23	22	2	27
OTU192	Primary:Bacteria;Phylum:Bacillota;Class:Clostridia;Order:Eubacteriales;Family:Lachnospiraceae;Genus:NA;Species:NA;	7	15	14	9	14	6	18	13	9	16	12	28	25	21	27	7	12	14	10	17	5	25	18	15	16	7	7	26	2	21	30	21	36	14	1	20	23	36	5	11
OTU193	Primary:Bacteria;Phylum:Bacillota;Class:Clostridia;Order:Eubacteriales;Family:Lachnospiraceae;Genus:NA;Species:NA;	13	9	20	20	28	28	15	11	6	27	17	45	12	24	21	44	15	8	10	14	22	26	7	34	28	12	32	8	59	12	28	31	67	26	1	41	35	82	1	28
OTU194	Primary:Bacteria;Phylum:Bacillota;Class:Erysipelotrichia;Order:Erysipelotrichales;Family:Erysipelotrichaceae;Genus:Faecalicoccus;Species:Faecalicoccus_acidiformans;	28	51	37	3	10	0	17	31	2	3	2	3	95	12	20	4	24	4	97	19	0	1	10	3	3	1	0	18	1	0	4	4	4	0	2	2	11	4	10	8
OTU195	Primary:Bacteria;Phylum:Bacillota;Class:Clostridia;Order:Eubacteriales;Family:Oscillospiraceae;Genus:NA;Species:NA;	26	25	3	6	94	3	1	56	16	12	4	3	5	3	48	2	1	6	2	67	1	2	55	6	3	7	7	27	2	5	13	11	3	2	113	3	31	2	19	4
OTU196	Primary:Bacteria;Phylum:Bacillota;Class:Clostridia;Order:Eubacteriales;Family:Christensenellaceae;Genus:NA;Species:NA;	2	6	9	2	15	5	0	9	8	6	8	6	4	1	13	5	0	4	1	7	7	7	1	0	0	9	1	2	9	1	25	25	6	4	8	100	6	9	2	102
OTU197	Primary:Bacteria;Phylum:Bacillota;Class:Clostridia;Order:Eubacteriales;Family:Christensenellaceae;Genus:NA;Species:NA;	11	37	46	17	31	7	11	36	50	52	12	5	61	4	16	29	50	59	1	6	3	21	17	12	10	44	8	3	25	7	5	5	11	3	1	1	4	10	3	20
OTU198	Primary:Bacteria;Phylum:Bacillota;Class:NA;Order:NA;Family:NA;Genus:NA;Species:NA;	0	0	0	0	0	0	0	1	0	0	0	0	0	0	0	1	0	0	0	1	56	2	0	83	1	0	0	0	1	19	65	28	0	0	3	4	73	0	0	1
OTU199	Primary:Bacteria;Phylum:Bacillota;Class:Clostridia;Order:Eubacteriales;Family:Oscillospiraceae;Genus:NA;Species:NA;	1	5	7	2	6	2	7	4	5	19	9	12	7	0	2	4	6	1	3	0	41	8	8	25	11	11	7	1	8	17	33	13	25	50	4	32	18	39	1	11
OTU2	Primary:Bacteria;Phylum:Bacillota;Class:Clostridia;Order:Eubacteriales;Family:Lachnospiraceae;Genus:NA;Species:NA;	291	427	1247	740	528	644	824	636	2442	840	1995	2978	1220	1411	588	1321	1487	1068	1516	273	493	1427	356	919	738	876	2362	306	627	1349	886	1334	2191	871	164	2147	1044	1558	134	1599
OTU20	Primary:Bacteria;Phylum:Verrucomicrobiota;Class:Verrucomicrobiia;Order:Verrucomicrobiales;Family:Akkermansiaceae;Genus:Akkermansia;Species:Akkermansia_mucinphila;	43	144	144	429	8	309	306	17	5	3	4	1525	41	5	317	2	258	138	24	37	27	111	104	935	156	2437	202	235	1307	3696	1458	2609	571	144	2632	460	89	950	47	111
OTU200	Primary:Bacteria;Phylum:Bacillota;Class:Clostridia;Order:Eubacteriales;Family:Oscillospiraceae;Genus:Thermocaproicibacter;Species:Thermocaproicibacter_melissae;	58	10	16	18	5	3	14	18	41	35	27	6	39	10	5	10	2	21	35	13	11	5	26	5	1	154	11	3	15	0	3	3	3	0	2	1	2	3	7	6
OTU201	Primary:Bacteria;Phylum:Bacteroidota;Class:Bacteroidia;Order:Bacteroidales;Family:Prevotellaceae;Genus:NA;Species:NA;	0	0	0	0	0	0	0	0	0	3	0	0	0	0	0	0	0	0	3	0	0	0	1	0	0	1	0	0	0	3	1	1	0	1	0	0	50	0	16	0
OTU202	Primary:Bacteria;Phylum:Bacillota;Class:Clostridia;Order:Eubacteriales;Family:Eubacteriales_incertae_sedis;Genus:Lentihominibacter;Species:Lentihominibacter_hominis;	23	12	1	10	14	27	14	10	36	8	12	0	11	0	1	28	3	1	0	0	72	5	9	39	13	25	4	1	91	4	41	4	1	25	3	1	3	3	2	2
OTU203	Primary:Bacteria;Phylum:Actinomycetota;Class:Coriobacteriia;Order:Eggerthellales;Family:Eggerthellaceae;Genus:NA;Species:NA;	16	29	19	7	16	3	14	22	12	29	15	13	36	31	35	8	15	9	27	10	1	6	17	12	4	76	10	7	23	34	34	1	14	8	8	6	10	4	1	17
OTU204	Primary:Bacteria;Phylum:Actinomycetota;Class:Actinobacteria;Order:Bifidobacteriales;Family:Bifidobacteriaceae;Genus:Bifidobacterium;Species:Bifidobacterium_gallinarum;	1	0	0	1	8	0	3	0	0	21	1	3	15	0	0	0	12	0	0	3	3	1	5	0	0	1	0	1	0	1	2	0	0	0	0	0	1	0	0	0
OTU205	Primary:Bacteria;Phylum:Bacillota;Class:Clostridia;Order:Eubacteriales;Family:NA;Genus:NA;Species:NA;	29	18	7	17	14	9	3	8	18	11	14	9	9	10	5	22	10	10	6	12	9	37	15	11	8	17	14	6	37	21	16	10	20	13	8	20	5	17	2	11
OTU206	Primary:Bacteria;Phylum:Bacillota;Class:Clostridia;Order:Eubacteriales;Family:NA;Genus:NA;Species:NA;	6	4	0	1	15	10	1	1	4	21	0	0	0	0	0	0	0	2	0	2	0	0	18	1	4	0	0	5	8	2	0	4	0	3	37	2	1	1	71	0
OTU207	Primary:Bacteria;Phylum:Bacteroidota;Class:Bacteroidia;Order:Bacteroidales;Family:Rikenellaceae;Genus:Alistipes;Species:NA;	13	282	0	4	209	16	8	169	30	16	5	1	28	0	39	0	0	4	1	171	1	5	15	4	9	5	0	115	12	1	0	1	2	2	29	2	3	0	97	1
OTU208	Primary:Bacteria;Phylum:Bacillota;Class:Clostridia;Order:Eubacteriales;Family:Lachnospiraceae;Genus:NA;Species:NA;	20	2	17	7	10	3	8	32	7	7	2	6	8	4	8	0	3	10	10	10	1	9	8	130	1	1	7	17	1	41	21	9	8	8	50	4	73	0	41	28
OTU209	Primary:Bacteria;Phylum:Bacillota;Class:Clostridia;Order:Eubacteriales;Family:NA;Genus:NA;Species:NA;	172	101	115	176	103	208	470	68	135	157	175	143	104	79	66	67	164	107	131	6	270	102	86	210	225	268	160	41	679	123	157	163	126	98	38	390	170	101	59	80
OTU21	Primary:Bacteria;Phylum:Bacillota;Class:Clostridia;Order:Eubacteriales;Family:Oscillospiraceae;Genus:NA;Species:NA;	90	204	160	13	50	9	81	242	323	15	791	65	169	1399	53	2393	23	222	157	33	1	40	65	12	5	19	130	28	6	49	295	270	109	67	72	108	327	109	16	1249
OTU210	Primary:Bacteria;Phylum:Bacillota;Class:NA;Order:NA;Family:NA;Genus:NA;Species:NA;	13	11	4	16	8	9	6	5	16	20	7	1	41	18	6	11	33	27	19	11	6	18	9	11	2	18	20	2	10	15	7	8	12	22	2	26	19	15	1	20
OTU211	Primary:Bacteria;Phylum:Bacillota;Class:Clostridia;Order:Eubacteriales;Family:Lachnospiraceae;Genus:NA;Species:NA;	46	14	48	38	74	6	56	157	136	130	56	178	79	92	85	28	79	36	33	11	69	35	115	30	31	36	73	191	27	20	194	49	43	59	7	76	13	153	4	40
OTU212	Primary:Bacteria;Phylum:Bacteroidota;Class:Bacteroidia;Order:Bacteroidales;Family:Bacteroidaceae;Genus:NA;Species:NA;	0	0	0	0	0	0	0	0	0	14	0	10	0	0	0	0	0	0	1	0	0	0	5	0	1	0	0	0	2	1	6	1	0	0	54	0	1	0	15	0
OTU213	Primary:Bacteria;Phylum:Bacillota;Class:Clostridia;Order:Eubacteriales;Family:Christensenellaceae;Genus:Gehongia;Species:Gehongia_tenuis;	1	23	55	2	10	0	12	40	35	13	7	8	21	24	10	62	0	4	1	61	3	0	18	0	0	9	3	14	2	2	18	10	3	1	170	5	18	17	16	26
OTU214	Primary:Bacteria;Phylum:Bacillota;Class:Clostridia;Order:Eubacteriales;Family:NA;Genus:NA;Species:NA;	32	5	76	323	51	1	31	0	2	81	3	117	13	5	5	1	0	23	0	2	15	4	278	5	5	3	98	19	11	0	22	3	4	5	2	1	3	15	1	7
OTU215	Primary:Bacteria;Phylum:Bacillota;Class:NA;Order:NA;Family:NA;Genus:NA;Species:NA;	36	17	8	92	14	186	19	22	25	12	45	8	4	15	8	5	23	19	4	0	18	36	49	26	23	9	11	2	21	20	27	16	15	37	37	76	9	14	7	16
OTU216	Primary:Bacteria;Phylum:Bacillota;Class:Clostridia;Order:Eubacteriales;Family:Oscillospiraceae;Genus:Solibaculum;Species:Solibaculum_mannosilyticum;	3	2	5	3	204	3	3	2	0	1	151	65	1	0	65	0	0	63	4	0	0	0	24	4	0	1	0	1	0	1	7	0	10	1	0	0	122	0	0	0
OTU217	Primary:Bacteria;Phylum:Actinomycetota;Class:Coriobacteriia;Order:Eggerthellales;Family:Eggerthellaceae;Genus:Adlercreutzia;Species:NA;	4	5	8	4	8	2	4	1	14	7	9	21	7	5	8	19	12	6	3	3	7	6	8	7	5	18	8	0	14	7	27	4	6	4	1	5	1	6	0	14
OTU219	Primary:Bacteria;Phylum:Bacillota;Class:Clostridia;Order:Eubacteriales;Family:Oscillospiraceae;Genus:Faecalibacterium;Species:Faecalibacterium_gallinarum;	0	0	0	6	0	0	36	79	16	22	9	0	1	0	0	2	0	1	0	0	0	0	0	1	3	0	2	0	0	6	2	14	6	3	33	0	9	3	263	0
OTU22	Primary:Bacteria;Phylum:Bacillota;Class:Clostridia;Order:Eubacteriales;Family:Oscillospiraceae;Genus:Gemmiger;Species:Gemmiger_gallinarum;	69	38	68	71	38	336	169	94	65	27	181	150	210	55	630	13	164	322	99	50	811	199	236	158	773	264	189	118	66	270	65	331	103	232	4	58	116	89	10	255
OTU220	Primary:Bacteria;Phylum:Bacillota;Class:Clostridia;Order:Eubacteriales;Family:Oscillospiraceae;Genus:NA;Species:NA;	225	16	17	30	26	4	15	18	34	20	25	6	47	22	41	23	9	46	13	40	13	0	47	3	1	25	7	8	32	2	5	0	4	5	7	2	18	4	2	22
OTU221	Primary:Bacteria;Phylum:Bacillota;Class:Bacilli;Order:Lactobacillales;Family:Leuconostocaceae;Genus:Weissella;Species:NA;	7	0	3	122	1	1	8	2	22	0	2	44	2	60	0	2	14	3	5	133	5	3	0	33	9	1	0	60	7	17	10	0	0	51	0	19	3	25	9	2
OTU222	Primary:Bacteria;Phylum:Bacillota;Class:Clostridia;Order:Eubacteriales;Family:Clostridiaceae1;Genus:Clostridiumsensustricto;Species:NA;	69	55	31	30	2	34	34	4	31	52	30	10	1	13	19	3	17	71	27	15	32	0	0	2	0	2	0	1	0	11	9	9	0	0	6	3	0	0	2	1
OTU223	Primary:Bacteria;Phylum:Pseudomonadota;Class:Betaproteobacteria;Order:Burkholderiales;Family:Sutterellaceae;Genus:Parasutterella;Species:Parasutterella_secunda;	23	17	1	8	94	4	1	42	0	12	1	2	3	1	21	0	4	5	0	54	0	5	21	6	1	6	0	40	2	2	2	6	5	3	32	3	1	0	54	1
OTU224	Primary:Bacteria;Phylum:Bacillota;Class:Clostridia;Order:Eubacteriales;Family:Lachnospiraceae;Genus:NA;Species:NA;	177	12	10	11	7	1	15	6	6	8	14	18	34	66	7	4	20	13	10	25	21	8	23	4	11	2	11	6	6	15	5	5	2	10	2	6	3	7	3	0
OTU225	Primary:Bacteria;Phylum:Bacteroidota;Class:Bacteroidia;Order:Bacteroidales;Family:Porphyromonadaceae;Genus:Parabacteroides;Species:NA;	1	10	0	1	23	4	0	2	2	13	4	16	18	1	3	0	0	0	1	8	0	0	2	9	2	1	0	0	3	3	3	0	2	0	177	0	15	1	127	0
OTU226	Primary:Bacteria;Phylum:Bacteroidota;Class:Bacteroidia;Order:Bacteroidales;Family:Rikenellaceae;Genus:Alistipes;Species:Alistipes_hominis;	69	35	0	6	45	1	7	18	18	17	8	4	22	6	35	9	1	3	1	22	0	2	23	0	0	7	5	4	9	2	1	1	1	0	12	0	4	0	10	0
OTU227	Primary:Bacteria;Phylum:Actinomycetota;Class:Coriobacteriia;Order:Eggerthellales;Family:Eggerthellaceae;Genus:Slackia;Species:Slackia_equolifaciens;	26	18	49	15	19	6	40	5	3	32	17	13	23	14	23	17	29	14	4	4	13	24	8	5	17	29	9	8	14	25	22	22	20	8	6	6	3	1	3	6
OTU228	Primary:Bacteria;Phylum:NA;Class:NA;Order:NA;Family:NA;Genus:NA;Species:NA;	4	0	9	56	45	0	28	7	4	43	58	41	24	0	0	1	6	36	0	1	1	0	21	10	1	17	67	2	1	0	3	4	9	0	1	4	0	0	0	1
OTU229	Primary:Bacteria;Phylum:Bacteroidota;Class:Bacteroidia;Order:Bacteroidales;Family:Rikenellaceae;Genus:Alistipes;Species:Alistipes_shahii;	6	33	2	1	34	2	4	44	10	11	1	3	2	0	21	2	0	1	2	29	1	0	21	1	0	1	0	47	0	0	0	0	0	1	19	2	0	0	51	1
OTU23	Primary:Bacteria;Phylum:Campylobacterota;Class:Campylobacteria;Order:Campylobacterales;Family:Helicobacteraceae;Genus:Helicobacter;Species:Helicobacter_pullorum;	3	57	0	4	0	0	2	4	5	1	0	0	1	1	1	1	0	2	0	0	0	0	3	0	34	0	0	3	1	2	26	1	25	2	52	19	14	16	4646	21
OTU230	Primary:Bacteria;Phylum:Bacillota;Class:Clostridia;Order:Eubacteriales;Family:Oscillospiraceae;Genus:NA;Species:NA;	41	40	23	0	92	4	7	57	51	4	5	3	4	52	14	35	3	9	24	52	0	3	31	3	2	8	6	27	8	6	6	10	4	0	27	5	61	36	29	52
OTU231	Primary:Bacteria;Phylum:Bacillota;Class:Clostridia;Order:Eubacteriales;Family:Oscillospiraceae;Genus:Caproicibacter;Species:Caproicibacter_fermentans;	5	5	19	0	3	0	6	0	10	3	4	16	15	29	17	11	6	11	11	7	0	0	6	2	0	10	4	3	3	5	4	8	10	0	2	4	7	6	0	28
OTU232	Primary:Bacteria;Phylum:Bacillota;Class:Clostridia;Order:Eubacteriales;Family:Oscillospiraceae;Genus:Flintibacter;Species:NA;	85	110	180	6	122	8	28	139	50	26	30	29	57	162	71	45	4	59	84	138	0	6	78	2	2	22	17	95	12	19	10	16	27	1	106	7	62	17	49	80
OTU233	Primary:Bacteria;Phylum:Bacillota;Class:Clostridia;Order:Eubacteriales;Family:Oscillospiraceae;Genus:NA;Species:NA;	11	35	2	0	52	3	6	16	21	5	13	2	15	3	4	3	1	4	0	0	7	3	13	1	21	1	3	1	0	31	1	1	0	1	71	0	0	0	8	0
OTU234	Primary:Bacteria;Phylum:Bacillota;Class:Clostridia;Order:Eubacteriales;Family:NA;Genus:NA;Species:NA;	188	87	100	401	193	339	133	94	132	110	119	181	121	63	150	59	46	193	227	11	648	168	104	200	431	263	81	18	1103	109	185	196	85	205	113	224	159	172	22	176
OTU235	Primary:Bacteria;Phylum:Bacillota;Class:Clostridia;Order:Eubacteriales;Family:Lachnospiraceae;Genus:NA;Species:NA;	4	4	20	4	21	3	9	4	11	13	5	7	8	6	7	1	6	8	10	4	13	6	10	3	1	1	12	5	7	20	33	10	19	21	2	5	9	21	3	3
OTU236	Primary:Bacteria;Phylum:Bacillota;Class:Clostridia;Order:Eubacteriales;Family:Oscillospiraceae;Genus:Dysosmobacter;Species:Dysosmobacter_hominis;	15	31	8	3	36	1	4	47	15	22	9	27	24	17	37	26	3	9	21	23	1	5	16	3	4	9	10	8	4	0	9	7	3	3	13	9	17	4	7	26
OTU237	Primary:Bacteria;Phylum:Bacillota;Class:Bacilli;Order:Lactobacillales;Family:Lactobacillaceae;Genus:Ligilactobacillus;Species:Ligilactobacillus_aviarius;	7	7	17	2	3	5	15	4	20	6	16	2	1	45	14	16	79	1	3	0	0	2	0	0	1	2	4	0	0	0	27	2	10	0	4	1	7	0	91	11
OTU238	Primary:Bacteria;Phylum:Bacillota;Class:Clostridia;Order:Eubacteriales;Family:Oscillospiraceae;Genus:Oscillibacter;Species:NA;	6	83	38	5	48	5	10	80	49	19	59	11	35	48	16	76	2	21	38	4	2	5	17	3	1	7	12	8	4	9	17	75	24	11	30	11	124	69	48	90
OTU239	Primary:Bacteria;Phylum:Bacteroidota;Class:Bacteroidia;Order:Bacteroidales;Family:Bacteroidaceae;Genus:Bacteroides;Species:NA;	4	6	7	1	5	4	1	1	2	5	0	6	1	0	2	0	0	3	3	3	1	0	2	1	2	1	0	0	1	2	3	1	2	0	31	1	10	1	118	0
OTU24	Primary:Bacteria;Phylum:Bacillota;Class:Clostridia;Order:Eubacteriales;Family:Oscillospiraceae;Genus:Pseudoflavonifractor;Species:NA;	207	246	3030	11	5	3	31	92	21	156	25	0	1	1	10	31	6	231	14	279	1	3	67	5	6	1	17	6	1	4	14	36	770	10	108	22	173	172	624	119
OTU240	Primary:Bacteria;Phylum:Bacillota;Class:NA;Order:NA;Family:NA;Genus:NA;Species:NA;	21	4	1	13	8	37	8	4	5	3	1	0	8	0	0	7	0	0	0	0	23	16	2	6	16	1	4	0	0	20	4	6	4	8	8	3	22	6	3	19
OTU241	Primary:Bacteria;Phylum:Actinomycetota;Class:Coriobacteriia;Order:Coriobacteriales;Family:Coriobacteriaceae;Genus:Enorma;Species:NA;	1	5	25	1	2	4	95	1	7	2	7	35	46	29	3	3	8	36	1	0	5	17	10	12	15	29	11	7	2	10	22	5	370	6	1	0	1	3	3	9
OTU242	Primary:Bacteria;Phylum:Bacillota;Class:Clostridia;Order:Eubacteriales;Family:Lachnospiraceae;Genus:Kineothrix;Species:Kineothrix_alysoides;	122	80	171	200	304	401	214	310	421	318	748	1161	389	431	260	183	375	291	589	268	740	600	143	572	90	1172	393	58	970	169	371	134	150	201	24	421	216	526	52	213
OTU243	Primary:Bacteria;Phylum:CandidatusSaccharibacteria;Class:NA;Order:NA;Family:NA;Genus:Saccharibacteria;Species:NA;	1	0	0	32	0	1	0	0	0	0	0	0	0	0	0	0	0	0	0	1	0	0	1	0	1	0	0	0	0	0	0	0	0	0	0	3	119	0	2	2
OTU244	Primary:Bacteria;Phylum:Bacillota;Class:Bacilli;Order:Caryophanales;Family:Bacillaceae;Genus:Scopulibacillus;Species:Scopulibacillus_daqui;	7	0	0	0	0	0	0	0	0	1	0	0	9	10	0	0	8	0	0	0	0	1	4	5	0	0	1	0	85	10	0	0	0	0	54	49	28	44	49	33
OTU245	Primary:Bacteria;Phylum:Bacteroidota;Class:Bacteroidia;Order:Bacteroidales;Family:Barnesiellaceae;Genus:Coprobacter;Species:NA;	50	11	0	2	37	1	0	56	19	5	0	4	2	0	50	1	0	2	0	5	0	2	44	0	2	1	1	5	2	0	0	0	0	0	37	1	1	0	4	1
OTU246	Primary:Bacteria;Phylum:Bacillota;Class:Clostridia;Order:Eubacteriales;Family:Lachnospiraceae;Genus:NA;Species:NA;	30	37	22	26	55	39	30	52	6	29	7	10	21	26	25	15	23	7	18	34	3	1	0	0	5	0	7	1	10	3	0	0	0	0	0	6	2	0	9	3
OTU247	Primary:Bacteria;Phylum:Bacillota;Class:Bacilli;Order:Caryophanales;Family:Thermoactinomycetaceae;Genus:Kroppenstedtia;Species:Kroppenstedtia_sanguinis;	1	73	1	0	0	0	0	1	0	51	0	0	10	1	0	1	2	6	0	0	0	10	2	43	2	9	0	1	32	5	5	0	0	3	12	64	28	43	57	78
OTU248	Primary:Bacteria;Phylum:NA;Class:NA;Order:NA;Family:NA;Genus:NA;Species:NA;	24	0	0	12	0	0	0	3	7	1	2	45	1	8	16	1	3	0	0	0	1	1	2	69	0	1	1	1	7	4	86	5	20	1	297	0	19	0	8	0
OTU249	Primary:Bacteria;Phylum:Bacillota;Class:Clostridia;Order:Eubacteriales;Family:Lachnospiraceae;Genus:NA;Species:NA;	28	26	4	5	20	2	10	14	12	18	20	12	41	14	23	18	12	14	25	19	7	8	15	18	9	4	28	11	7	21	24	6	22	19	6	21	21	39	3	3
OTU25	Primary:Bacteria;Phylum:Bacillota;Class:Clostridia;Order:Eubacteriales;Family:Oscillospiraceae;Genus:NA;Species:NA;	18	88	127	323	44	329	306	269	3822	25	1934	8	1630	471	17	13	795	578	10	3	4	162	17	223	35	365	235	10	92	6	338	4	291	9	4	21	19	4	11	129
OTU250	Primary:Bacteria;Phylum:Bacillota;Class:Clostridia;Order:Eubacteriales;Family:NA;Genus:NA;Species:NA;	5	19	5	1	6	1	1	10	7	0	17	3	24	4	7	38	0	3	3	1	0	5	3	1	0	0	4	2	0	5	4	6	6	0	17	8	9	2	0	23
OTU251	Primary:Bacteria;Phylum:Bacillota;Class:Clostridia;Order:Eubacteriales;Family:Oscillospiraceae;Genus:NA;Species:NA;	2	0	4	1	2	1	1	5	10	3	4	10	0	1	6	4	0	0	3	2	2	4	0	9	1	0	3	0	0	1	44	4	8	17	1	30	23	50	1	8
OTU252	Primary:Bacteria;Phylum:Bacteroidota;Class:Bacteroidia;Order:Bacteroidales;Family:Odoribacteraceae;Genus:Butyricimonas;Species:NA;	8	18	0	5	13	3	2	5	8	9	1	0	1	0	7	0	1	0	0	0	0	2	29	2	0	1	0	50	2	0	1	0	0	3	22	1	1	0	366	1
OTU253	Primary:Bacteria;Phylum:Bacillota;Class:NA;Order:NA;Family:NA;Genus:NA;Species:NA;	11	22	16	18	43	48	0	16	6	5	6	4	5	1	18	11	5	4	0	0	1	23	12	25	33	20	5	1	42	2	9	11	8	72	49	48	8	10	41	30
OTU254	Primary:Bacteria;Phylum:Bacillota;Class:Bacilli;Order:Caryophanales;Family:Bacillaceae;Genus:Bacillus;Species:Bacillus_licheniformis;	0	4	9	14	5	0	1	98	0	1	1	30	40	1	0	64	0	5	9	23	0	12	24	19	14	7	0	18	17	37	9	0	0	20	8	44	26	25	16	20
OTU255	Primary:Bacteria;Phylum:Bacillota;Class:Bacilli;Order:Caryophanales;Family:Bacillaceae;Genus:NA;Species:NA;	0	2	0	1	0	0	0	0	0	0	9	1	0	0	0	57	1	0	0	2	0	0	0	1	1	0	0	0	0	1	0	1	0	0	14	0	3	45	20	1
OTU256	Primary:Bacteria;Phylum:NA;Class:NA;Order:NA;Family:NA;Genus:NA;Species:NA;	0	0	0	0	0	0	0	9	0	0	0	75	0	1	5	14	0	2	0	5	7	0	0	5	0	4	0	0	0	1	3	0	1	1	34	2	1	0	0	0
OTU257	Primary:Bacteria;Phylum:Synergistota;Class:Synergistia;Order:Synergistales;Family:NA;Genus:NA;Species:NA;	3	3	0	10	2	17	7	3	5	5	10	6	7	4	2	3	0	2	3	3	24	18	4	11	13	7	15	1	15	9	11	38	10	12	2	12	13	19	0	4
OTU258	Primary:Bacteria;Phylum:Bacillota;Class:Clostridia;Order:Eubacteriales;Family:Oscillospiraceae;Genus:NA;Species:NA;	9	6	7	7	0	4	1	13	1	74	3	0	13	1	0	0	4	18	0	0	15	34	4	4	8	0	4	0	0	5	9	0	0	1	0	5	25	4	0	4
OTU259	Primary:Bacteria;Phylum:Bacteroidota;Class:Bacteroidia;Order:Bacteroidales;Family:Prevotellaceae;Genus:NA;Species:NA;	10	42	16	11	33	31	20	14	4	31	11	6	3	12	5	8	3	8	3	8	5	1	0	0	0	0	0	0	0	1	0	0	0	0	0	1	0	0	1	1
OTU26	Primary:Bacteria;Phylum:Bacillota;Class:Clostridia;Order:Eubacteriales;Family:Oscillospiraceae;Genus:NA;Species:NA;	16	46	57	86	71	134	88	38	129	128	243	383	93	3	4	301	56	126	15	4	24	14	36	125	162	44	183	26	8	52	125	239	82	145	22	223	203	105	9	200
OTU260	Primary:Bacteria;Phylum:Bacillota;Class:Clostridia;Order:Eubacteriales;Family:Oscillospiraceae;Genus:Anaerotruncus;Species:NA;	19	22	0	1	33	2	2	30	8	5	0	6	3	0	38	1	0	1	0	41	1	4	20	0	0	2	0	18	2	0	1	0	0	1	29	1	2	0	13	1
OTU261	Primary:Bacteria;Phylum:Bacillota;Class:Clostridia;Order:Eubacteriales;Family:Oscillospiraceae;Genus:NA;Species:NA;	14	14	0	4	24	3	75	7	2	0	2	0	18	15	158	19	14	0	7	13	6	1	19	0	1	21	0	0	10	3	0	0	4	1	4	1	3	11	1	5
OTU262	Primary:Bacteria;Phylum:Bacillota;Class:Clostridia;Order:Eubacteriales;Family:Lachnospiraceae;Genus:NA;Species:NA;	5	2	6	21	5	13	12	10	26	17	32	0	10	1	0	45	10	7	0	0	6	2	5	3	3	1	11	0	1	4	32	13	3	20	1	6	7	12	5	1
OTU263	Primary:Bacteria;Phylum:Bacillota;Class:Bacilli;Order:Lactobacillales;Family:Lactobacillaceae;Genus:Pediococcus;Species:Pediococcus_pentosaceus;	10	0	11	0	9	0	3	1	9	0	0	0	0	0	0	0	8	0	9	1	5	1	0	19	1	0	0	65	3	0	0	2	0	69	0	0	1	20	0	0
OTU264	Primary:Bacteria;Phylum:Bacteroidota;Class:Bacteroidia;Order:Bacteroidales;Family:Bacteroidaceae;Genus:Phocaeicola;Species:NA;	0	0	0	2	9	2	0	0	0	0	2	0	0	0	0	0	0	3	1	0	1	0	0	0	1	5	0	0	11	0	4	0	12	0	23	2	24	0	216	1
OTU265	Primary:Bacteria;Phylum:Bacillota;Class:Clostridia;Order:Eubacteriales;Family:Eubacteriales;Genus:NA;Species:NA;	3	17	16	1	26	1	4	18	7	6	3	5	16	16	28	20	5	9	27	16	1	1	15	0	2	18	3	19	6	0	9	4	14	43	10	4	3	13	11	4
OTU266	Primary:Bacteria;Phylum:Bacillota;Class:Clostridia;Order:Eubacteriales;Family:Oscillospiraceae;Genus:NA;Species:NA;	6	7	7	10	4	3	13	6	4	20	12	25	6	10	7	19	14	6	14	3	4	5	6	2	4	10	4	1	34	1	5	3	0	2	0	0	0	16	3	4
OTU267	Primary:Bacteria;Phylum:Bacillota;Class:Clostridia;Order:Eubacteriales;Family:NA;Genus:NA;Species:NA;	47	36	2	4	73	6	1	38	15	4	1	8	4	0	37	1	0	5	1	47	1	2	17	1	4	7	1	21	0	3	2	1	0	0	85	2	4	1	10	0
OTU268	Primary:Bacteria;Phylum:Bacillota;Class:Clostridia;Order:Eubacteriales;Family:Peptococcaceae;Genus:NA;Species:NA;	46	16	55	3	16	1	3	13	14	6	17	5	24	81	43	63	2	5	2	10	2	2	24	7	0	2	2	7	0	12	35	15	13	1	9	5	29	25	2	27
OTU269	Primary:Bacteria;Phylum:Bacillota;Class:Clostridia;Order:Eubacteriales;Family:Lachnospiraceae;Genus:NA;Species:NA;	10	11	4	8	5	1	10	44	22	3	5	301	4	7	3	22	3	16	15	12	2	3	7	1	2	7	12	9	8	24	2	61	21	10	3	10	15	41	2	11
OTU27	Primary:Bacteria;Phylum:Bacillota;Class:Clostridia;Order:Eubacteriales;Family:NA;Genus:NA;Species:NA;	129	40	59	65	62	147	126	111	264	144	110	211	120	114	130	1225	129	81	39	33	367	73	82	62	58	196	39	15	206	91	199	338	144	227	47	313	112	136	14	222
OTU270	Primary:Bacteria;Phylum:Bacillota;Class:Clostridia;Order:Eubacteriales;Family:Oscillospiraceae;Genus:Ruminococcoides;Species:Ruminococcoides_bili;	16	3	4	0	2	0	0	2	0	1	0	1	0	0	0	3	0	2	0	1	0	0	1	0	1	1	0	2	0	0	0	5	0	0	0	0	1	0	18	4
OTU271	Primary:Bacteria;Phylum:Bacillota;Class:Clostridia;Order:Eubacteriales;Family:Oscillospiraceae;Genus:NA;Species:NA;	22	40	28	1	27	2	7	21	10	4	41	10	41	24	7	31	0	5	19	32	3	2	39	0	1	4	17	14	1	10	14	2	6	2	68	15	9	3	10	48
OTU272	Primary:Bacteria;Phylum:Bacillota;Class:Clostridia;Order:Eubacteriales;Family:Lachnospiraceae;Genus:Roseburia;Species:Roseburia_intestinalis;	16	11	272	13	29	3	11	8	55	10	6	17	6	15	7	8	5	9	1	8	11	5	0	2	2	0	165	27	2	5	2	2	6	1	4	2	1	0	1	1
OTU273	Primary:Bacteria;Phylum:Bacillota;Class:Clostridia;Order:Eubacteriales;Family:Oscillospiraceae;Genus:NA;Species:NA;	3	0	11	1	9	0	10	5	9	14	16	3	2	2	2	0	6	9	2	1	5	1	3	42	0	22	2	8	1	1	6	6	79	12	1	7	35	0	0	6
OTU274	Primary:Bacteria;Phylum:Bacillota;Class:Clostridia;Order:Eubacteriales;Family:Lachnospiraceae;Genus:NA;Species:NA;	15	7	19	5	1	4	16	18	3	33	17	3	2	26	7	7	2	30	62	103	0	10	25	1	9	1	2	8	3	3	21	0	20	4	0	7	21	3	1	2
OTU275	Primary:Bacteria;Phylum:Bacteroidota;Class:Bacteroidia;Order:Bacteroidales;Family:Odoribacteraceae;Genus:Butyricimonas;Species:NA;	6	2	0	0	2	0	0	0	0	1	0	6	1	0	2	0	0	4	0	0	0	1	29	3	0	9	2	40	0	1	0	0	1	0	89	0	2	0	10	0
OTU276	Primary:Bacteria;Phylum:Bacillota;Class:Clostridia;Order:Eubacteriales;Family:Oscillospiraceae;Genus:NA;Species:NA;	21	43	106	0	9	2	3	7	1	8	2	6	44	9	47	45	3	18	46	36	1	2	23	0	1	2	6	20	1	5	15	148	12	0	0	93	3	54	6	35
OTU277	Primary:Bacteria;Phylum:NA;Class:NA;Order:NA;Family:NA;Genus:NA;Species:NA;	0	0	0	7	0	0	2	0	0	0	0	7	0	0	15	0	0	0	0	0	0	1	8	35	1	0	0	0	0	0	17	0	12	0	0	1	7	0	1	0
OTU278	Primary:Bacteria;Phylum:Bacillota;Class:Clostridia;Order:Eubacteriales;Family:Christensenellaceae;Genus:NA;Species:NA;	3	1	1	9	7	12	4	1	14	5	15	0	4	5	0	10	9	5	0	0	8	8	6	13	4	19	11	0	5	8	9	6	3	5	0	6	2	8	1	13
OTU279	Primary:Bacteria;Phylum:Bacillota;Class:Clostridia;Order:Eubacteriales;Family:Oscillospiraceae;Genus:NA;Species:NA;	8	4	2	0	0	8	1	12	4	6	6	1	2	0	10	0	0	2	1	1	0	0	11	1	0	0	2	2	3	4	2	0	1	1	31	0	13	1	1	0
OTU28	Primary:Bacteria;Phylum:Bacillota;Class:NA;Order:NA;Family:NA;Genus:NA;Species:NA;	55	18	1584	122	483	144	115	41	358	281	19	82	68	63	10	531	57	34	2	10	42	316	53	255	271	322	286	15	840	100	163	111	28	37	10	30	10	158	6	105
OTU280	Primary:Bacteria;Phylum:Bacillota;Class:Clostridia;Order:Eubacteriales;Family:Oscillospiraceae;Genus:Sporobacter;Species:Sporobacter_termitidis;	7	3	4	5	4	0	4	3	24	4	9	38	11	10	2	12	5	12	28	9	6	3	2	7	2	5	6	0	6	20	6	11	7	7	6	4	5	1	1	12
OTU282	Primary:Bacteria;Phylum:Bacillota;Class:Clostridia;Order:Eubacteriales;Family:Oscillospiraceae;Genus:NA;Species:NA;	8	2	3	10	0	0	1	1	3	2	5	0	1	8	1	8	0	1	0	0	2	4	0	7	7	1	6	0	22	0	6	2	17	5	2	63	1	28	3	0
OTU283	Primary:Bacteria;Phylum:Bacillota;Class:Clostridia;Order:Eubacteriales;Family:Lachnospiraceae;Genus:Catenibacillus;Species:Catenibacillus_scindens;	21	17	13	3	15	0	11	16	11	4	4	20	13	23	25	25	9	7	10	22	7	8	27	6	0	3	31	31	1	24	10	10	13	11	0	33	24	21	2	32
OTU284	Primary:Bacteria;Phylum:Bacillota;Class:Clostridia;Order:Eubacteriales;Family:Oscillospiraceae;Genus:Vescimonas;Species:NA;	2	5	0	3	3	1	4	3	1	1	1	15	0	7	10	3	1	0	1	1	5	2	4	2	0	5	5	2	0	13	4	8	5	13	4	12	4	11	0	1
OTU285	Primary:Bacteria;Phylum:Bacillota;Class:NA;Order:NA;Family:NA;Genus:NA;Species:NA;	6	5	4	28	9	11	0	6	26	1	0	1	5	0	5	2	2	5	0	0	2	9	6	2	4	7	1	1	15	5	1	11	2	13	10	64	13	2	4	2
OTU286	Primary:Bacteria;Phylum:Bacillota;Class:Erysipelotrichia;Order:Erysipelotrichales;Family:Erysipelotrichaceae;Genus:Breznakia;Species:NA;	0	0	13	11	1	9	1	0	0	2	47	4	7	0	0	0	2	6	0	0	0	28	12	0	59	9	10	1	0	0	4	0	14	5	8	12	4	1	1	3
OTU287	Primary:Bacteria;Phylum:Bacillota;Class:Clostridia;Order:Eubacteriales;Family:Lachnospiraceae;Genus:NA;Species:NA;	0	0	0	2	0	5	0	1	0	4	0	0	0	0	0	6	0	0	0	1	0	0	0	2	1	1	1	0	0	0	5	71	15	8	17	57	8	26	0	1
OTU288	Primary:Bacteria;Phylum:Bacillota;Class:Clostridia;Order:Eubacteriales;Family:NA;Genus:NA;Species:NA;	7	7	18	0	2	1	3	6	6	1	4	1	6	24	19	37	1	6	5	2	1	0	8	1	0	0	2	0	0	0	8	10	4	1	11	0	4	16	0	11
OTU289	Primary:Bacteria;Phylum:Bacillota;Class:Clostridia;Order:Eubacteriales;Family:Lachnospiraceae;Genus:NA;Species:NA;	15	1	15	22	32	7	0	0	3	0	23	5	0	0	13	13	14	10	0	0	4	40	11	6	95	3	7	3	85	22	1	0	0	0	0	3	10	0	1	0
OTU29	Primary:Bacteria;Phylum:Bacteroidota;Class:Bacteroidia;Order:Bacteroidales;Family:Bacteroidaceae;Genus:Mediterranea;Species:Mediterranea_massiliensis;	801	267	25	13	34	1	8	39	20	11	12	34	183	2	1040	4	11	6	4	1830	5	8	433	16	39	70	5	180	68	50	22	4	11	1	1221	24	51	12	3490	15
OTU290	Primary:Bacteria;Phylum:Bacteroidota;Class:Bacteroidia;Order:Bacteroidales;Family:Odoribacteraceae;Genus:Odoribacter;Species:Odoribacter_splanchnicus;	3	51	0	1	26	2	5	19	6	4	2	5	33	0	15	0	1	0	0	4	0	1	3	5	1	3	1	4	0	0	0	0	0	1	41	0	1	0	27	0
OTU291	Primary:Bacteria;Phylum:Bacteroidota;Class:Bacteroidia;Order:Bacteroidales;Family:Rikenellaceae;Genus:Alistipes;Species:Alistipes_communis;	66	26	0	0	49	0	1	20	10	6	0	2	7	0	38	1	1	0	0	18	0	0	7	0	0	2	0	5	0	0	0	0	0	0	7	1	0	0	2	0
OTU292	Primary:Bacteria;Phylum:Bacillota;Class:Clostridia;Order:Eubacteriales;Family:Oscillospiraceae;Genus:Ruminococcus;Species:Ruminococcus_bromii;	58	2	31	3	2	27	2	1	3	2	2	0	2	1	0	6	6	6	6	1	22	0	0	1	11	1	1	12	5	0	0	0	0	0	0	40	3	19	2	2
OTU293	Primary:Bacteria;Phylum:Bacillota;Class:Clostridia;Order:Eubacteriales;Family:NA;Genus:NA;Species:NA;	39	3	12	9	62	0	3	24	10	1	0	40	30	14	1	68	23	8	0	0	2	123	2	76	11	112	0	2	129	34	2	2	1	0	0	0	0	26	2	12
OTU294	Primary:Bacteria;Phylum:Bacillota;Class:Clostridia;Order:Eubacteriales;Family:Oscillospiraceae;Genus:Monoglobus;Species:Monoglobus_pectinilyticus;	3	0	17	6	2	1	3	1	2	7	10	2	0	0	0	2	3	5	1	1	5	4	1	2	1	1	1	4	1	2	22	23	0	5	2	9	14	28	1	3
OTU295	Primary:Bacteria;Phylum:Bacillota;Class:Clostridia;Order:Eubacteriales;Family:Oscillospiraceae;Genus:Fumia;Species:Fumia_xinanensis;	6	2	33	0	13	0	11	37	10	1	7	5	13	25	26	14	0	8	5	26	0	5	1	0	0	1	0	1	0	1	2	1	1	1	1	1	1	0	1	0
OTU296	Primary:Bacteria;Phylum:Bacillota;Class:NA;Order:NA;Family:NA;Genus:NA;Species:NA;	12	3	0	8	10	4	2	8	5	4	4	1	0	0	0	0	1	2	0	0	3	2	1	1	2	0	5	1	0	1	1	4	4	4	66	12	5	3	1	0
OTU297	Primary:Bacteria;Phylum:Pseudomonadota;Class:Deltaproteobacteria;Order:NA;Family:NA;Genus:NA;Species:NA;	0	0	0	0	1	4	0	0	3	3	9	25	0	0	0	1	0	2	3	0	3	0	0	0	1	0	0	1	0	0	0	2	2	0	143	0	15	0	2	1
OTU298	Primary:Bacteria;Phylum:Bacillota;Class:Clostridia;Order:Eubacteriales;Family:Eubacteriales;Genus:Ihubacter;Species:Ihubacter_massiliensis;	12	8	10	2	7	7	4	9	17	5	8	8	8	6	1	9	12	7	5	4	7	3	4	16	10	4	4	8	0	1	8	11	12	7	2	18	4	5	2	4
OTU299	Primary:Bacteria;Phylum:Bacillota;Class:Clostridia;Order:Eubacteriales;Family:Oscillospiraceae;Genus:NA;Species:NA;	1	7	4	2	1	4	3	3	18	4	11	10	21	0	4	3	4	8	2	0	32	7	4	6	14	9	22	0	30	23	7	14	2	27	0	4	1	8	1	17
OTU3	Primary:Bacteria;Phylum:Bacillota;Class:Clostridia;Order:Eubacteriales;Family:Oscillospiraceae;Genus:NA;Species:NA;	125	31	1209	562	65	2513	1679	67	2055	466	545	154	96	51	20	142	811	887	68	31	39	880	186	81	202	2757	292	38	33	43	283	212	606	261	14	1069	940	245	59	662
OTU30	Primary:Bacteria;Phylum:Bacillota;Class:Clostridia;Order:Eubacteriales;Family:Oscillospiraceae;Genus:NA;Species:NA;	20	618	44	52	55	117	1378	172	90	67	516	90	52	34	87	116	336	36	10	37	11	261	21	22	46	56	657	12	2	161	72	109	87	19	23	278	97	321	36	54
OTU300	Primary:Bacteria;Phylum:Bacillota;Class:Clostridia;Order:Eubacteriales;Family:NA;Genus:NA;Species:NA;	3	7	3	2	3	1	7	10	21	6	15	3	17	6	3	16	9	1	4	1	2	3	1	3	0	5	1	0	3	1	7	4	9	7	2	4	0	1	1	6
OTU301	Primary:Bacteria;Phylum:Bacillota;Class:Clostridia;Order:Eubacteriales;Family:NA;Genus:NA;Species:NA;	42	6	0	7	0	15	3	2	7	1	1	0	0	0	0	3	4	0	0	0	0	0	0	11	0	0	0	0	1	3	6	22	26	19	24	0	16	5	0	0
OTU302	Primary:Bacteria;Phylum:NA;Class:NA;Order:NA;Family:NA;Genus:NA;Species:NA;	1	0	1	0	1	7	0	0	2	6	0	3	0	0	0	0	0	1	0	0	3	1	1	2	0	0	1	0	0	44	2	3	0	5	8	3	6	2	0	3
OTU303	Primary:Bacteria;Phylum:Bacillota;Class:Clostridia;Order:Eubacteriales;Family:Eubacteriales_incertae_sedis;Genus:Lentihominibacter;Species:Lentihominibacter_hominis;	2	1	8	7	5	4	7	1	6	7	5	3	5	8	3	8	5	1	2	2	7	3	5	13	0	7	9	0	4	1	15	3	3	6	0	7	4	2	1	9
OTU304	Primary:Bacteria;Phylum:Pseudomonadota;Class:Alphaproteobacteria;Order:Rhodospirillales;Family:NA;Genus:NA;Species:NA;	68	73	0	4	88	7	5	156	19	1	0	2	0	0	28	1	1	3	0	8	0	8	43	3	0	1	1	19	1	0	2	0	1	0	65	2	2	0	1	0
OTU305	Primary:Bacteria;Phylum:NA;Class:NA;Order:NA;Family:NA;Genus:NA;Species:NA;	4	3	1	31	1	1	0	2	0	1	13	2	0	1	0	8	0	1	0	1	0	0	2	14	0	1	0	2	1	3	2	10	1	4	23	1	4	0	1	4
OTU306	Primary:Bacteria;Phylum:Bacillota;Class:Clostridia;Order:Eubacteriales;Family:Oscillospiraceae;Genus:NA;Species:NA;	32	19	28	2	41	3	16	44	12	14	11	8	33	38	30	97	0	40	16	41	1	7	48	2	0	13	5	30	1	56	3	10	9	0	78	9	23	4	16	47
OTU307	Primary:Bacteria;Phylum:Bacillota;Class:Clostridia;Order:Eubacteriales;Family:Christensenellaceae;Genus:Gehongia;Species:Gehongia_tenuis;	5	4	18	0	12	1	2	12	5	3	2	4	14	8	7	8	0	4	11	35	0	2	3	0	1	1	0	2	1	2	6	1	0	0	30	1	3	1	3	15
OTU308	Primary:Bacteria;Phylum:Bacillota;Class:Clostridia;Order:Eubacteriales;Family:Oscillospiraceae;Genus:NA;Species:NA;	3	11	19	1	14	0	22	3	0	37	0	10	14	1	3	2	26	1	8	11	13	2	20	1	11	56	13	61	9	2	2	0	4	1	2	0	2	3	25	0
OTU309	Primary:Bacteria;Phylum:Bacillota;Class:Clostridia;Order:Eubacteriales;Family:Oscillospiraceae;Genus:NA;Species:NA;	2	3	0	0	2	0	0	2	2	0	1	0	0	25	0	23	0	3	0	0	3	3	2	4	0	0	6	4	16	1	2	5	13	1	1	24	5	63	0	24
OTU31	Primary:Bacteria;Phylum:Bacillota;Class:Clostridia;Order:Eubacteriales;Family:Lachnospiraceae;Genus:NA;Species:NA;	158	155	191	122	210	383	311	176	561	215	589	592	422	303	228	27	958	342	87	49	444	519	173	254	26	837	583	62	1298	517	508	56	79	143	33	443	49	38	24	598
OTU310	Primary:Bacteria;Phylum:Pseudomonadota;Class:Betaproteobacteria;Order:Burkholderiales;Family:Sutterellaceae;Genus:Sutterella;Species:Sutterella_timonensis;	0	1	0	2	0	0	0	1	5	1	3	3	1	0	2	0	0	2	0	7	0	0	8	1	0	2	0	1	1	1	1	0	2	0	49	0	1	0	61	0
OTU311	Primary:Bacteria;Phylum:Bacillota;Class:Clostridia;Order:Eubacteriales;Family:Oscillospiraceae;Genus:Neglecta;Species:Neglecta_timonensis;	6	3	37	1	12	2	1	10	2	5	2	0	10	2	5	1	3	1	2	2	0	1	5	1	1	0	0	4	0	0	0	2	9	1	5	1	3	1	8	8
OTU312	Primary:Bacteria;Phylum:Bacillota;Class:Clostridia;Order:Eubacteriales;Family:Oscillospiraceae;Genus:NA;Species:NA;	1	9	5	0	4	0	0	5	6	1	2	5	3	7	2	14	0	1	1	3	0	0	3	0	0	0	0	2	0	3	6	20	5	3	8	3	4	7	2	10
OTU313	Primary:Bacteria;Phylum:Bacillota;Class:Clostridia;Order:Eubacteriales;Family:NA;Genus:NA;Species:NA;	9	0	0	13	28	4	2	10	8	10	5	0	1	0	0	0	1	3	1	0	0	3	6	2	19	5	7	6	3	9	6	8	4	28	10	3	27	2	2	24
OTU315	Primary:Bacteria;Phylum:Actinomycetota;Class:Coriobacteriia;Order:Coriobacteriales;Family:Coriobacteriaceae;Genus:Collinsella;Species:NA;	17	1	2	8	2	0	10	0	3	8	6	3	4	1	1	0	5	13	0	0	3	0	9	5	1	2	11	3	0	11	26	1	19	7	6	4	1	0	1	11
OTU316	Primary:Bacteria;Phylum:Bacillota;Class:Clostridia;Order:Eubacteriales;Family:Oscillospiraceae;Genus:NA;Species:NA;	1	3	4	0	8	0	1	6	1	4	1	15	7	12	10	0	0	5	17	2	6	7	1	1	1	1	2	5	2	0	6	24	5	0	1	121	2	7	5	20
OTU317	Primary:Bacteria;Phylum:Bacillota;Class:Clostridia;Order:Eubacteriales;Family:Christensenellaceae;Genus:Beduinibacterium;Species:Beduinibacterium_massiliense;	7	2	0	3	3	8	2	3	2	1	1	3	0	5	1	3	0	4	3	2	3	2	3	1	0	2	1	1	2	1	1	19	2	12	7	13	4	3	0	5
OTU318	Primary:Bacteria;Phylum:Bacteroidota;Class:Bacteroidia;Order:Bacteroidales;Family:Porphyromonadaceae;Genus:NA;Species:NA;	9	18	0	0	4	6	1	40	5	3	1	1	10	0	18	1	0	1	0	87	0	0	5	1	0	4	0	13	1	0	1	0	0	1	12	0	3	0	3	0
OTU319	Primary:Bacteria;Phylum:Bacillota;Class:Bacilli;Order:Lactobacillales;Family:Leuconostocaceae;Genus:Leuconostoc;Species:Leuconostoc_citreum;	5	0	4	0	7	0	6	7	11	0	0	1	0	3	0	2	10	1	5	2	2	1	1	15	0	0	0	54	2	4	0	0	1	72	0	0	0	12	0	1
OTU32	Primary:Bacteria;Phylum:Bacillota;Class:Clostridia;Order:Eubacteriales;Family:NA;Genus:NA;Species:NA;	302	1	240	92	155	17	195	110	49	391	86	207	179	83	1	9	123	241	4	1	392	561	106	53	407	586	12	15	702	60	88	15	33	52	22	124	3	15	8	11
OTU320	Primary:Bacteria;Phylum:NA;Class:NA;Order:NA;Family:NA;Genus:NA;Species:NA;	0	0	2	0	1	0	1	0	0	0	0	0	3	10	6	2	124	0	0	7	0	2	1	0	6	0	1	0	1	0	0	0	19	0	0	0	10	0	0	0
OTU321	Primary:Bacteria;Phylum:Bacillota;Class:NA;Order:NA;Family:NA;Genus:NA;Species:NA;	0	2	0	0	6	1	3	1	10	2	1	2	2	7	0	2	0	0	0	0	27	0	0	5	1	0	28	1	23	5	2	15	4	10	2	0	1	0	0	8
OTU322	Primary:Bacteria;Phylum:Bacillota;Class:Clostridia;Order:Eubacteriales;Family:Oscillospiraceae;Genus:Ructibacterium;Species:Ructibacterium_gallinarum;	3	6	3	8	2	3	0	9	16	3	11	1	0	1	1	6	0	0	0	1	3	3	1	7	1	0	1	0	0	3	27	23	5	6	28	64	14	2	3	12
OTU323	Primary:Bacteria;Phylum:Bacillota;Class:Clostridia;Order:Eubacteriales;Family:Oscillospiraceae;Genus:Lawsonibacter;Species:NA;	5	12	10	5	20	6	5	18	26	5	20	15	14	14	20	30	2	13	13	6	4	10	6	1	2	5	3	2	0	11	6	12	5	0	3	24	21	9	1	33
OTU324	Primary:Bacteria;Phylum:Bacillota;Class:NA;Order:NA;Family:NA;Genus:NA;Species:NA;	0	2	8	33	0	17	5	0	1	0	1	0	3	0	0	0	1	2	0	0	3	5	8	36	13	0	3	0	9	9	3	0	1	13	0	4	12	0	3	3
OTU325	Primary:Bacteria;Phylum:Bacillota;Class:Clostridia;Order:Eubacteriales;Family:Lachnospiraceae;Genus:NA;Species:NA;	5	4	6	3	4	5	3	1	4	0	6	12	6	3	1	14	1	1	13	2	4	4	1	5	1	2	11	0	11	2	2	5	4	2	0	13	0	8	2	3
OTU326	Primary:Bacteria;Phylum:Actinomycetota;Class:Actinobacteria;Order:Pseudonocardiales;Family:Pseudonocardiaceae;Genus:Saccharopolyspora;Species:Saccharopolyspora_rectivirgula;	4	0	13	1	0	0	0	0	5	1	9	0	2	1	0	1	1	0	2	0	0	2	0	2	77	7	0	3	9	2	82	0	1	0	3	18	6	1	102	7
OTU327	Primary:Bacteria;Phylum:Bacillota;Class:Clostridia;Order:Eubacteriales;Family:Peptococcaceae;Genus:Peptococcus;Species:Peptococcus_niger;	17	10	20	5	5	2	9	12	10	15	16	14	7	13	17	3	7	10	3	7	3	1	1	1	2	9	2	4	15	1	2	2	7	2	11	0	3	0	2	6
OTU328	Primary:Bacteria;Phylum:Bacillota;Class:Negativicutes;Order:Veillonellales;Family:Veillonellaceae;Genus:Veillonella;Species:Veillonella_magna;	0	4	0	0	0	1	1	0	0	4	1	0	1	1	0	2	0	1	0	0	2	0	1	0	0	0	0	0	0	0	0	7	0	0	0	0	4	7	77	0
OTU329	Primary:Bacteria;Phylum:Bacillota;Class:Clostridia;Order:Eubacteriales;Family:NA;Genus:NA;Species:NA;	73	40	3	1	6	8	0	31	5	2	1	7	7	1	40	0	0	3	0	17	0	2	52	3	3	1	1	28	1	3	1	1	1	0	48	1	2	1	31	0
OTU33	Primary:Bacteria;Phylum:Bacillota;Class:Clostridia;Order:Eubacteriales;Family:Oscillospiraceae;Genus:Faecalibacterium;Species:Faecalibacterium_prausnitzii;	141	211	1489	50	737	42	103	279	351	117	130	149	2915	149	79	18	32	132	7	14	5	18	131	14	13	131	73	550	36	38	13	5	28	8	58	10	29	55	397	165
OTU330	Primary:Bacteria;Phylum:Bacillota;Class:Clostridia;Order:Eubacteriales;Family:Oscillospiraceae;Genus:NA;Species:NA;	17	16	2	3	17	0	23	11	4	7	1	0	1	0	4	0	0	1	1	31	0	1	5	1	1	1	0	12	0	0	1	1	3	0	43	0	4	0	4	2
OTU331	Primary:Bacteria;Phylum:Bacillota;Class:Clostridia;Order:Eubacteriales;Family:Oscillospiraceae;Genus:NA;Species:NA;	2	2	3	0	1	0	4	1	2	0	2	1	0	7	1	0	1	1	3	3	2	0	2	1	0	0	1	6	1	0	1	0	1	0	4	0	1	0	1	0
OTU332	Primary:Bacteria;Phylum:Bacillota;Class:Clostridia;Order:Eubacteriales;Family:Lachnospiraceae;Genus:NA;Species:NA;	151	209	156	70	121	77	61	107	121	36	374	384	335	129	87	118	156	44	124	209	888	199	76	244	35	487	412	16	505	351	173	98	180	187	13	109	200	268	28	226
OTU333	Primary:Bacteria;Phylum:Bacillota;Class:Clostridia;Order:Eubacteriales;Family:NA;Genus:NA;Species:NA;	29	25	1	1	81	7	0	22	22	3	2	7	1	1	25	0	2	2	0	46	6	2	30	6	4	3	1	5	2	3	2	0	3	1	88	6	0	0	28	1
OTU334	Primary:Bacteria;Phylum:Bacillota;Class:Bacilli;Order:Lactobacillales;Family:Lactobacillaceae;Genus:Limosilactobacillus;Species:Limosilactobacillus_ingluviei;	1	1	5	1	1	1	2	0	2	1	9	3	13	5	3	2	11	16	7	4	5	2	1	21	4	3	2	0	2	9	15	4	23	1	9	10	11	13	13	2
OTU335	Primary:Bacteria;Phylum:Bacillota;Class:Erysipelotrichia;Order:Erysipelotrichales;Family:Erysipelotrichaceae;Genus:Dielma;Species:Dielma_fastidiosa;	12	8	24	1	4	27	30	0	0	54	69	1	1	0	0	42	14	0	9	0	0	10	2	4	1	0	7	1	0	19	2	0	0	0	18	0	2	0	45	11
OTU336	Primary:Bacteria;Phylum:Bacillota;Class:Clostridia;Order:Eubacteriales;Family:Lachnospiraceae;Genus:NA;Species:NA;	1	0	0	1	0	2	0	1	2	4	17	25	2	3	3	39	2	2	0	0	1	7	0	0	1	0	18	0	0	1	3	17	31	0	1	2	16	4	0	2
OTU337	Primary:Bacteria;Phylum:Bacillota;Class:NA;Order:NA;Family:NA;Genus:NA;Species:NA;	0	3	4	0	0	3	32	1	11	2	0	0	6	0	0	0	12	4	0	0	1	1	6	0	8	28	0	0	9	0	7	4	20	5	28	2	11	8	6	0
OTU338	Primary:Bacteria;Phylum:Bacillota;Class:Clostridia;Order:Eubacteriales;Family:NA;Genus:NA;Species:NA;	3	0	27	34	4	6	7	1	4	6	16	12	4	1	0	14	3	0	0	0	1	30	14	11	11	3	3	0	14	2	27	0	3	9	0	1	5	2	0	13
OTU339	Primary:Bacteria;Phylum:Bacillota;Class:Clostridia;Order:Eubacteriales;Family:Oscillospiraceae;Genus:NA;Species:NA;	1	0	1	1	8	0	1	3	1	2	1	1	3	1	9	4	0	1	0	0	0	0	2	0	0	0	4	0	0	4	5	22	6	2	6	8	17	11	0	9
OTU34	Primary:Bacteria;Phylum:Bacillota;Class:Clostridia;Order:Eubacteriales;Family:NA;Genus:NA;Species:NA;	20	206	36	166	117	299	48	119	31	66	278	161	170	52	58	1300	188	22	3	3	914	840	81	111	345	1492	48	16	194	87	375	317	49	330	73	260	90	193	25	209
OTU340	Primary:Bacteria;Phylum:Pseudomonadota;Class:Gammaproteobacteria;Order:Enterobacterales;Family:Erwiniaceae;Genus:Pantoea;Species:NA;	22	2	10	2	70	0	9	0	45	1	0	0	17	2	0	0	38	0	13	3	10	1	0	7	1	0	1	24	1	0	1	0	0	29	0	2	7	7	1	1
OTU341	Primary:Bacteria;Phylum:Bacteroidota;Class:Bacteroidia;Order:Bacteroidales;Family:Prevotellaceae;Genus:NA;Species:NA;	6	31	18	13	9	11	8	12	2	17	6	6	5	7	4	4	3	6	6	10	2	0	0	0	0	0	3	1	2	0	0	0	0	0	0	0	1	1	1	1
OTU342	Primary:Bacteria;Phylum:Bacillota;Class:Clostridia;Order:Eubacteriales;Family:Oscillospiraceae;Genus:Flintibacter;Species:Flintibacter_hominis;	155	141	213	9	259	11	21	207	79	31	12	55	62	164	94	25	1	68	98	298	1	9	108	2	1	33	5	188	12	11	29	10	79	3	107	2	94	38	87	82
OTU343	Primary:Bacteria;Phylum:Bacillota;Class:Clostridia;Order:Eubacteriales;Family:Christensenellaceae;Genus:Luoshenia;Species:Luoshenia_tenuis;	1	3	14	0	1	1	0	4	4	0	1	4	6	13	3	6	1	14	9	1	0	0	2	1	1	1	0	2	0	1	1	1	0	0	32	4	4	0	1	2
OTU344	Primary:Bacteria;Phylum:Bacillota;Class:Clostridia;Order:Eubacteriales;Family:Oscillospiraceae;Genus:NA;Species:NA;	0	0	0	4	1	1	0	0	3	0	9	0	0	0	0	1	0	0	0	0	5	0	3	11	0	3	0	0	0	5	7	16	8	0	5	0	25	5	1	17
OTU345	Primary:Bacteria;Phylum:Bacillota;Class:Clostridia;Order:Eubacteriales;Family:Oscillospiraceae;Genus:NA;Species:NA;	3	5	5	0	14	1	2	12	9	2	6	9	3	4	7	12	3	27	4	10	0	4	3	0	0	0	4	3	0	2	3	5	5	1	3	5	7	4	2	20
OTU346	Primary:Bacteria;Phylum:Bacillota;Class:Clostridia;Order:Eubacteriales;Family:Christensenellaceae;Genus:Gehongia;Species:Gehongia_tenuis;	4	3	0	5	3	5	1	1	4	3	7	5	5	3	2	23	1	1	2	1	11	7	8	16	10	5	6	0	9	5	0	1	0	6	3	9	3	1	1	6
OTU347	Primary:Bacteria;Phylum:Bacillota;Class:Clostridia;Order:Eubacteriales;Family:Oscillospiraceae;Genus:NA;Species:NA;	0	1	3	1	15	0	0	0	6	2	1	14	1	4	2	0	0	1	3	0	0	0	0	1	2	0	0	1	0	4	1	3	2	5	0	0	7	3	1	0
OTU348	Primary:Bacteria;Phylum:Bacillota;Class:Clostridia;Order:Eubacteriales;Family:Oscillospiraceae;Genus:NA;Species:NA;	10	7	3	2	2	6	5	6	7	4	1	7	12	6	8	0	0	3	8	1	2	1	1	2	0	2	3	1	5	4	13	5	0	5	4	2	5	8	3	1
OTU349	Primary:Bacteria;Phylum:Bacillota;Class:Clostridia;Order:Eubacteriales;Family:NA;Genus:NA;Species:NA;	2	1	11	9	10	6	2	10	1	3	7	2	3	8	0	1	4	0	0	0	2	1	3	1	2	1	2	0	3	2	5	14	4	17	0	2	2	199	2	0
OTU35	Primary:Bacteria;Phylum:Bacteroidota;Class:Bacteroidia;Order:Bacteroidales;Family:Bacteroidaceae;Genus:Phocaeicola;Species:Phocaeicola_caecigallinarum;	3183	4667	14	37	1722	177	71	1891	250	117	12	145	203	3	1170	7	10	20	4	2787	4	30	1089	86	56	46	28	493	131	48	91	41	29	29	3877	51	233	16	6732	29
OTU350	Primary:Bacteria;Phylum:Bacillota;Class:Clostridia;Order:Eubacteriales;Family:Christensenellaceae;Genus:NA;Species:NA;	2	2	9	9	2	3	3	1	3	7	0	1	0	2	4	6	0	10	0	0	4	11	2	3	11	1	6	0	3	3	1	3	1	8	0	4	1	4	1	4
OTU351	Primary:Bacteria;Phylum:Bacillota;Class:Bacilli;Order:Lactobacillales;Family:Lactobacillaceae;Genus:Limosilactobacillus;Species:Limosilactobacillus_reuteri;	13	21	16	16	5	3	7	13	13	10	16	3	6	29	10	8	14	18	4	4	10	1	2	11	1	2	2	1	4	4	13	10	18	14	30	24	15	38	23	32
OTU352	Primary:Bacteria;Phylum:Bacillota;Class:Clostridia;Order:Eubacteriales;Family:NA;Genus:NA;Species:NA;	4	8	0	6	52	2	10	49	2	3	1	9	2	0	24	0	0	7	4	104	1	7	64	4	2	8	1	29	7	1	1	0	1	0	25	0	0	0	5	0
OTU353	Primary:Bacteria;Phylum:Bacteroidota;Class:Bacteroidia;Order:Bacteroidales;Family:Barnesiellaceae;Genus:Barnesiella;Species:Barnesiella_viscericola;	5	120	0	2	17	10	6	13	7	4	1	2	3	0	5	3	1	1	2	18	1	2	19	0	1	3	0	2	0	0	0	1	0	0	5	0	1	0	10	1
OTU354	Primary:Bacteria;Phylum:Bacillota;Class:Clostridia;Order:Eubacteriales;Family:Lachnospiraceae;Genus:NA;Species:NA;	8	35	9	37	6	3	23	21	2	26	2	28	4	3	14	8	2	5	1	30	1	0	0	0	1	0	1	0	0	0	0	0	0	0	0	1	1	0	4	3
OTU355	Primary:Bacteria;Phylum:Bacillota;Class:Clostridia;Order:Eubacteriales;Family:Christensenellaceae;Genus:Guopingia;Species:Guopingia_tenuis;	3	2	5	1	3	0	1	1	6	1	11	9	7	4	6	7	0	5	5	1	5	5	1	4	0	6	3	0	3	8	8	4	3	7	4	10	6	8	0	5
OTU356	Primary:Bacteria;Phylum:Bacillota;Class:Bacilli;Order:Caryophanales;Family:Thermoactinomycetaceae;Genus:Thermoactinomyces;Species:Thermoactinomyces_daqus;	11	10	0	0	0	0	0	0	0	16	0	0	4	21	0	0	11	2	0	0	0	0	1	12	0	0	5	0	29	6	4	0	0	0	24	44	20	30	44	39
OTU357	Primary:Bacteria;Phylum:Pseudomonadota;Class:Betaproteobacteria;Order:Burkholderiales;Family:Sutterellaceae;Genus:Duodenibacillus;Species:Duodenibacillus_massiliensis;	5	4	0	0	2	0	1	17	0	1	0	0	0	0	0	0	0	1	0	1	0	5	78	1	1	2	1	35	0	0	0	0	3	0	58	0	0	0	23	0
OTU358	Primary:Bacteria;Phylum:Elusimicrobiota;Class:Elusimicrobia;Order:Elusimicrobiales;Family:Elusimicrobiaceae;Genus:Elusimicrobium;Species:Elusimicrobium_minutum;	2	3	0	1	28	2	1	6	2	1	0	2	2	0	0	0	1	0	2	4	0	0	3	1	1	0	0	3	0	0	0	0	3	0	6	0	0	0	1	0
OTU359	Primary:Bacteria;Phylum:Bacillota;Class:Clostridia;Order:Eubacteriales;Family:Lachnospiraceae;Genus:NA;Species:NA;	81	8	18	8	59	3	15	10	3	16	3	2	9	54	75	1	16	10	14	2	0	8	23	38	0	5	1	39	3	29	17	3	37	2	1	2	5	5	2	11
OTU36	Primary:Bacteria;Phylum:Bacillota;Class:Clostridia;Order:Eubacteriales;Family:NA;Genus:NA;Species:NA;	415	177	262	1145	273	802	518	177	483	224	342	461	245	930	131	756	913	275	971	180	758	1193	538	981	814	468	530	54	492	455	658	800	499	1111	64	653	610	1003	74	656
OTU360	Primary:Bacteria;Phylum:Bacteroidota;Class:NA;Order:NA;Family:NA;Genus:NA;Species:NA;	18	33	0	1	10	1	1	20	4	6	0	0	2	0	16	0	0	0	0	18	0	0	3	0	1	0	0	3	4	0	0	1	0	0	0	0	0	0	1	0
OTU363	Primary:Bacteria;Phylum:Bacillota;Class:Clostridia;Order:Eubacteriales;Family:Oscillospiraceae;Genus:Flintibacter;Species:NA;	3	10	0	1	25	3	2	7	4	0	2	0	4	2	2	8	0	0	0	9	0	0	2	2	0	0	1	2	0	2	0	4	1	1	48	3	28	16	9	27
OTU364	Primary:Bacteria;Phylum:Bacillota;Class:Clostridia;Order:Eubacteriales;Family:NA;Genus:NA;Species:NA;	35	8	22	69	24	52	55	18	20	13	25	34	13	28	15	28	16	37	2	1	37	58	15	56	72	28	23	2	95	19	41	25	14	78	3	57	30	24	6	33
OTU365	Primary:Bacteria;Phylum:Bacillota;Class:Clostridia;Order:Eubacteriales;Family:Oscillospiraceae;Genus:NA;Species:NA;	2	3	3	4	8	1	6	0	3	6	11	5	8	10	1	3	2	3	4	1	1	3	5	1	0	1	4	1	0	2	5	6	2	6	5	3	0	0	1	3
OTU367	Primary:Bacteria;Phylum:Pseudomonadota;Class:Deltaproteobacteria;Order:Desulfovibrionales;Family:Desulfovibrionaceae;Genus:Mailhella;Species:Mailhella_massiliensis;	32	47	4	7	136	8	7	127	24	5	6	12	4	11	52	2	1	8	5	35	0	3	129	9	2	4	3	42	11	5	2	8	2	1	103	3	18	2	48	2
OTU368	Primary:Bacteria;Phylum:Bacillota;Class:Clostridia;Order:Eubacteriales;Family:NA;Genus:NA;Species:NA;	0	0	0	0	1	0	1	0	3	1	0	1	0	0	0	0	0	0	0	1	0	1	0	17	1	1	1	2	0	8	4	6	2	20	0	20	14	4	1	2
OTU369	Primary:Bacteria;Phylum:Bacillota;Class:Clostridia;Order:Eubacteriales;Family:Oscillospiraceae;Genus:NA;Species:NA;	0	11	0	0	0	0	0	0	2	0	0	2	0	0	0	1	0	0	0	0	2	0	0	0	0	0	0	0	0	5	7	13	0	3	9	0	19	16	2	7
OTU37	Primary:Bacteria;Phylum:Bacillota;Class:Clostridia;Order:Eubacteriales;Family:NA;Genus:NA;Species:NA;	317	244	68	39	159	76	42	139	298	65	151	92	133	183	191	325	26	55	20	115	67	40	71	15	20	41	98	30	65	150	516	229	203	115	209	594	539	339	54	239
OTU370	Primary:Bacteria;Phylum:Bacillota;Class:Clostridia;Order:Eubacteriales;Family:NA;Genus:NA;Species:NA;	25	26	0	2	70	13	1	3	4	20	0	1	3	0	0	0	0	6	1	1	0	2	53	0	1	1	3	11	0	0	1	0	3	0	93	1	5	0	2	0
OTU371	Primary:Bacteria;Phylum:Bacillota;Class:Clostridia;Order:Eubacteriales;Family:Oscillospiraceae;Genus:Oscillibacter;Species:Oscillibacter_hominis;	3	26	27	2	3	2	5	38	5	4	4	1	12	2	2	19	1	16	1	1	0	1	3	1	0	0	16	0	5	5	1	17	4	1	1	6	1	5	4	7
OTU373	Primary:Bacteria;Phylum:NA;Class:NA;Order:NA;Family:NA;Genus:NA;Species:NA;	0	0	0	0	1	0	0	0	0	1	0	0	1	0	0	0	1	1	0	0	0	2	17	2	4	0	2	5	8	1	5	2	5	3	0	2	12	2	3	1
OTU374	Primary:Bacteria;Phylum:Bacillota;Class:Clostridia;Order:Eubacteriales;Family:NA;Genus:NA;Species:NA;	13	25	2	4	11	4	1	5	1	1	0	7	1	0	18	0	0	2	0	8	0	1	9	1	0	0	1	16	0	0	1	1	0	0	13	0	2	0	14	0
OTU375	Primary:Bacteria;Phylum:Bacillota;Class:Clostridia;Order:Eubacteriales;Family:Oscillospiraceae;Genus:NA;Species:NA;	2	1	4	0	3	2	1	2	4	1	8	5	2	7	5	4	0	11	5	2	0	3	0	1	1	0	1	0	0	2	3	13	7	0	1	3	1	3	0	7
OTU376	Primary:Bacteria;Phylum:Bacteroidota;Class:Bacteroidia;Order:Bacteroidales;Family:Rikenellaceae;Genus:Alistipes;Species:Alistipes_shahii;	19	4	1	1	21	0	1	4	6	0	0	4	8	0	15	0	0	0	0	9	1	2	12	1	1	2	3	4	0	1	0	1	0	0	4	0	0	0	5	0
OTU377	Primary:Bacteria;Phylum:Bacteroidota;Class:Bacteroidia;Order:Bacteroidales;Family:Bacteroidaceae;Genus:Phocaeicola;Species:NA;	0	23	0	0	15	11	2	3	5	1	0	1	4	2	0	0	0	0	0	0	3	0	0	0	0	0	3	0	0	0	0	1	6	0	23	0	3	0	12	1
OTU378	Primary:Bacteria;Phylum:Pseudomonadota;Class:Alphaproteobacteria;Order:Rhodospirillales;Family:NA;Genus:NA;Species:NA;	0	0	0	1	0	0	0	0	0	0	1	2	0	0	16	0	0	2	0	0	0	2	6	3	0	1	0	4	2	0	1	6	4	0	12	3	2	1	8	1
OTU379	Primary:Bacteria;Phylum:Bacillota;Class:Clostridia;Order:Eubacteriales;Family:Lachnospiraceae;Genus:Sellimonas;Species:Sellimonas_monacensis;	41	45	106	70	24	14	97	29	88	113	41	144	68	57	63	55	228	157	68	70	67	38	93	52	38	57	113	110	77	30	127	73	78	65	22	42	80	86	53	46
OTU38	Primary:Bacteria;Phylum:Bacillota;Class:Clostridia;Order:Eubacteriales;Family:Lachnospiraceae;Genus:Merdimonas;Species:Merdimonas_faecis;	185	134	41	120	178	49	197	203	125	180	138	283	79	168	163	74	136	102	240	115	72	42	130	158	35	111	125	75	207	110	173	123	424	142	30	51	184	181	56	54
OTU380	Primary:Bacteria;Phylum:Bacillota;Class:NA;Order:NA;Family:NA;Genus:NA;Species:NA;	8	1	4	1	0	21	0	17	6	5	0	4	3	1	10	2	0	1	0	0	0	1	19	1	0	0	2	1	3	10	4	9	2	2	1	5	2	8	0	1
OTU381	Primary:Bacteria;Phylum:Bacillota;Class:Clostridia;Order:Eubacteriales;Family:Eubacteriaceae;Genus:NA;Species:NA;	4	2	1	6	2	2	9	4	3	10	13	0	5	4	1	1	7	0	3	0	0	3	1	3	3	2	2	1	0	3	1	4	2	4	2	4	4	0	0	6
OTU382	Primary:Bacteria;Phylum:Bacillota;Class:Clostridia;Order:Eubacteriales;Family:Oscillospiraceae;Genus:Paludihabitans;Species:Paludihabitans_psychrotolerans;	1	0	3	1	0	5	0	1	0	2	3	0	1	11	0	0	2	0	0	1	0	1	1	0	0	0	0	0	0	1	3	9	8	9	4	28	17	0	4	0
OTU383	Primary:Bacteria;Phylum:Bacillota;Class:Clostridia;Order:Eubacteriales;Family:Oscillospiraceae;Genus:Vescimonas;Species:NA;	2	1	0	16	5	43	0	0	1	1	5	0	1	0	0	2	1	0	0	0	0	0	0	1	0	1	0	0	0	1	2	4	4	0	1	14	26	2	0	4
OTU384	Primary:Bacteria;Phylum:Bacillota;Class:Clostridia;Order:Eubacteriales;Family:Oscillospiraceae;Genus:NA;Species:NA;	1	1	0	0	4	0	0	0	0	0	0	0	0	1	1	0	0	0	0	8	1	2	2	0	0	0	0	2	0	0	1	0	2	0	68	1	1	1	13	2
OTU385	Primary:Bacteria;Phylum:Bacillota;Class:Clostridia;Order:Eubacteriales;Family:NA;Genus:NA;Species:NA;	2	86	0	2	0	2	1	0	13	0	1	0	1	1	2	0	1	7	0	4	0	0	2	6	1	0	1	12	0	1	0	5	0	0	65	1	2	0	2	0
OTU386	Primary:Bacteria;Phylum:Bacillota;Class:Clostridia;Order:Eubacteriales;Family:Oscillospiraceae;Genus:Ructibacterium;Species:Ructibacterium_gallinarum;	2	1	2	1	5	3	3	1	1	4	6	8	4	0	4	1	4	0	1	1	14	2	4	6	5	7	6	0	11	1	4	1	3	1	0	1	1	2	0	0
OTU387	Primary:Bacteria;Phylum:Bacillota;Class:Clostridia;Order:Eubacteriales;Family:NA;Genus:NA;Species:NA;	30	1	1	0	2	0	1	54	0	3	0	0	0	0	21	1	0	0	0	7	0	2	5	0	0	0	0	0	0	0	0	0	0	0	0	0	0	0	15	0
OTU388	Primary:Bacteria;Phylum:Bacillota;Class:Clostridia;Order:Eubacteriales;Family:Christensenellaceae;Genus:NA;Species:NA;	0	0	2	1	1	0	1	0	1	2	1	4	2	0	6	6	2	0	0	1	0	10	1	1	1	0	4	1	0	11	1	21	0	0	0	1	9	2	0	8
OTU389	Primary:Bacteria;Phylum:Bacillota;Class:Clostridia;Order:Eubacteriales;Family:Oscillospiraceae;Genus:NA;Species:NA;	0	1	4	0	2	0	4	0	0	4	5	1	5	7	8	1	0	2	14	2	0	0	2	0	0	1	0	0	0	1	0	4	3	0	5	1	3	1	2	0
OTU39	Primary:Bacteria;Phylum:Bacillota;Class:Erysipelotrichia;Order:Erysipelotrichales;Family:Erysipelotrichaceae;Genus:Faecalitalea;Species:Faecalitalea_cylindroides;	1	84	177	120	113	2	148	1	2	728	18	274	840	4	4	1	15	358	9	3	0	1	132	20	10	29	145	374	2	5	287	5	247	24	16	0	114	3	111	62
OTU390	Primary:Bacteria;Phylum:Bacillota;Class:Clostridia;Order:Eubacteriales;Family:Lachnospiraceae;Genus:NA;Species:NA;	9	17	4	2	50	0	2	13	4	3	5	5	4	13	26	4	5	14	29	6	4	4	11	3	3	5	5	37	1	3	3	2	4	1	2	0	1	5	4	6
OTU391	Primary:Bacteria;Phylum:Bacillota;Class:Clostridia;Order:Eubacteriales;Family:Oscillospiraceae;Genus:NA;Species:NA;	3	6	0	0	82	1	1	4	40	2	2	2	1	0	33	3	0	4	1	15	0	0	6	0	1	3	0	4	1	0	0	0	0	0	2	0	0	0	0	1
OTU392	Primary:Bacteria;Phylum:Bacillota;Class:Clostridia;Order:Eubacteriales;Family:Oscillospiraceae;Genus:Intestinimonas;Species:NA;	0	4	3	0	0	8	0	0	2	0	3	0	2	2	0	2	0	1	0	0	1	5	2	0	1	0	0	2	2	1	7	20	9	7	2	22	6	5	2	13
OTU393	Primary:Bacteria;Phylum:Pseudomonadota;Class:Gammaproteobacteria;Order:Pasteurellales;Family:Pasteurellaceae;Genus:Gallibacterium;Species:Gallibacterium_anatis;	3	13	1	0	1	1	1	0	1	19	0	0	1	0	0	1	0	0	0	0	0	0	1	0	3	0	0	0	1	0	3	0	0	0	9	1	1	0	287	1
OTU394	Primary:Bacteria;Phylum:Bacillota;Class:Clostridia;Order:Eubacteriales;Family:Oscillospiraceae;Genus:NA;Species:NA;	2	2	10	2	0	0	3	2	0	1	0	1	0	5	1	0	1	1	2	3	4	0	9	1	0	4	0	5	3	0	10	0	3	1	1	8	3	3	0	1
OTU397	Primary:Bacteria;Phylum:Bacillota;Class:Clostridia;Order:Eubacteriales;Family:Oscillospiraceae;Genus:NA;Species:NA;	3	3	3	3	1	0	3	1	5	1	3	7	3	4	5	0	3	11	4	2	4	0	2	2	2	4	4	0	4	3	4	1	4	1	0	3	1	3	0	9
OTU398	Primary:Bacteria;Phylum:Bacillota;Class:Clostridia;Order:Eubacteriales;Family:NA;Genus:NA;Species:NA;	3	7	1	0	2	0	0	3	1	3	0	2	3	0	6	0	0	0	1	27	0	0	1	0	0	4	0	5	0	0	1	3	0	0	15	0	2	0	0	0
OTU399	Primary:Bacteria;Phylum:Bacillota;Class:Clostridia;Order:Eubacteriales;Family:Oscillospiraceae;Genus:NA;Species:NA;	6	34	3	1	14	1	2	7	4	3	2	2	2	2	12	5	0	0	1	11	1	0	7	1	0	1	0	6	1	0	1	1	0	0	19	1	5	3	13	1
OTU4	Primary:Bacteria;Phylum:Synergistota;Class:Synergistia;Order:Synergistales;Family:Synergistaceae;Genus:Cloacibacillus;Species:Cloacibacillus_porcorum;	1402	1853	1677	7239	2326	12158	5583	3968	2494	2971	2196	750	631	8551	1190	4581	9919	4968	7366	1224	4102	9263	2251	15777	13790	6516	1405	779	1128	11104	1943	5379	4419	8828	663	8028	4125	4726	554	3721
OTU40	Primary:Bacteria;Phylum:Actinomycetota;Class:Coriobacteriia;Order:Coriobacteriales;Family:Atopobiaceae;Genus:Thermophilibacter;Species:Thermophilibacter_provencensis;	97	52	84	87	71	48	257	76	39	355	159	345	128	203	367	264	326	179	506	50	365	48	106	31	113	182	94	165	368	33	142	30	244	79	6	17	35	79	7	80
OTU400	Primary:Bacteria;Phylum:Bacillota;Class:Clostridia;Order:Eubacteriales;Family:Oscillospiraceae;Genus:NA;Species:NA;	3	12	0	0	9	0	0	3	1	0	0	0	4	0	2	1	0	0	0	11	0	0	0	1	0	1	0	0	2	0	1	0	0	0	26	0	0	0	16	0
OTU401	Primary:Bacteria;Phylum:Bacillota;Class:Clostridia;Order:Eubacteriales;Family:Lachnospiraceae;Genus:Blautia;Species:NA;	15	4	7	4	17	3	2	5	12	2	3	2	1	0	27	2	2	2	13	14	5	5	18	3	1	3	1	9	2	2	6	3	5	2	0	4	3	6	0	0
OTU402	Primary:Bacteria;Phylum:Bacillota;Class:Clostridia;Order:Eubacteriales;Family:Oscillospiraceae;Genus:NA;Species:NA;	1	0	0	2	0	0	3	1	5	0	6	5	5	1	1	2	0	0	0	0	3	5	1	0	5	2	0	0	3	3	3	2	0	2	1	6	3	1	1	3
OTU403	Primary:Bacteria;Phylum:Bacillota;Class:Erysipelotrichia;Order:Erysipelotrichales;Family:Turicibacteraceae;Genus:Turicibacter;Species:Turicibacter_bilis;	5	12	10	2	12	11	3	9	0	6	7	1	6	6	2	2	4	3	1	2	0	0	0	0	0	0	1	0	0	0	0	0	0	0	0	0	1	0	2	2
OTU404	Primary:Bacteria;Phylum:Bacillota;Class:Clostridia;Order:Eubacteriales;Family:NA;Genus:NA;Species:NA;	5	10	0	2	39	9	5	65	0	11	1	13	0	0	1	0	0	2	0	9	0	2	26	3	0	1	4	37	0	1	2	0	2	1	76	0	1	0	39	0
OTU405	Primary:Bacteria;Phylum:Bacillota;Class:Clostridia;Order:Eubacteriales;Family:Oscillospiraceae;Genus:NA;Species:NA;	4	3	0	0	1	1	0	1	1	0	0	0	0	0	2	0	0	0	0	1	0	1	4	2	0	0	0	1	0	0	2	1	0	0	19	0	0	0	57	0
OTU406	Primary:Bacteria;Phylum:Bacillota;Class:Clostridia;Order:NA;Family:NA;Genus:NA;Species:NA;	0	3	8	1	5	0	6	3	4	3	11	3	4	9	3	20	0	4	0	0	0	1	0	0	0	4	7	0	0	18	15	2	3	5	0	11	9	6	1	3
OTU407	Primary:Bacteria;Phylum:Bacillota;Class:Clostridia;Order:Eubacteriales;Family:Oscillospiraceae;Genus:NA;Species:NA;	0	3	1	6	1	4	1	2	3	1	2	5	0	0	5	3	0	1	5	0	2	3	3	5	3	2	3	0	0	0	4	0	0	4	2	1	2	6	0	2
OTU408	Primary:Bacteria;Phylum:Bacillota;Class:Clostridia;Order:Eubacteriales;Family:Oscillospiraceae;Genus:NA;Species:NA;	1	0	1	3	2	2	2	2	1	3	5	2	3	1	0	2	2	3	2	2	2	1	2	3	0	2	3	0	1	3	11	1	0	3	0	2	6	7	0	1
OTU409	Primary:Bacteria;Phylum:Bacillota;Class:Clostridia;Order:Eubacteriales;Family:Oscillospiraceae;Genus:Zongyangia;Species:Zongyangia_hominis;	2	1	10	0	3	0	0	5	2	0	0	1	1	1	19	1	0	0	9	22	0	0	0	0	0	0	0	1	1	0	1	0	0	0	5	0	0	0	1	4
OTU41	Primary:Bacteria;Phylum:Pseudomonadota;Class:NA;Order:NA;Family:NA;Genus:NA;Species:NA;	52	86	207	77	181	25	79	18	35	89	41	91	19	84	57	104	45	8	378	25	50	156	259	214	293	84	263	150	1952	120	461	208	266	32	229	16	17	25	73	8
OTU410	Primary:Bacteria;Phylum:Bacillota;Class:Clostridia;Order:Eubacteriales;Family:NA;Genus:NA;Species:NA;	2	2	4	0	0	1	6	0	0	8	0	0	14	0	5	0	10	0	0	2	0	2	11	0	2	0	2	0	10	0	3	0	0	2	1	0	2	1	0	0
OTU411	Primary:Bacteria;Phylum:Bacillota;Class:Bacilli;Order:Caryophanales;Family:Staphylococcaceae;Genus:Staphylococcus;Species:Staphylococcus_saprophyticus;	0	13	0	1	0	0	1	0	0	0	0	0	0	0	0	11	1	15	0	1	0	6	0	1	17	12	0	5	1	26	19	1	0	0	2	9	1	1	14	6
OTU412	Primary:Bacteria;Phylum:Bacillota;Class:Clostridia;Order:Eubacteriales;Family:Oscillospiraceae;Genus:NA;Species:NA;	5	22	6	4	7	0	1	29	0	4	1	3	0	0	8	0	0	1	5	8	1	0	13	0	0	0	1	3	0	0	3	0	1	0	10	1	6	3	1	6
OTU413	Primary:Bacteria;Phylum:Bacillota;Class:Bacilli;Order:Caryophanales;Family:Bacillaceae;Genus:Shouchella;Species:Shouchella_clausii;	0	1	0	0	0	0	0	0	0	0	0	9	7	1	1	6	0	5	0	11	0	12	6	5	3	1	0	4	2	8	2	0	0	0	2	8	3	2	4	6
OTU414	Primary:Bacteria;Phylum:Bacillota;Class:Clostridia;Order:Eubacteriales;Family:Oscillospiraceae;Genus:NA;Species:NA;	0	4	2	0	3	0	0	11	1	5	3	5	4	14	0	9	0	2	4	4	0	2	8	0	0	0	0	2	0	1	0	0	0	0	12	1	0	0	3	0
OTU415	Primary:Bacteria;Phylum:Bacillota;Class:NA;Order:NA;Family:NA;Genus:NA;Species:NA;	3	0	2	10	0	3	0	0	5	10	1	0	0	0	0	9	0	1	0	0	0	13	3	3	3	0	0	1	0	1	5	0	3	7	0	4	4	0	1	2
OTU416	Primary:Bacteria;Phylum:Bacillota;Class:NA;Order:NA;Family:NA;Genus:NA;Species:NA;	0	4	1	10	6	7	9	1	11	0	1	0	0	0	0	0	0	0	0	0	0	4	0	4	0	0	0	0	0	6	0	4	1	7	6	4	0	3	0	0
OTU417	Primary:Bacteria;Phylum:NA;Class:NA;Order:NA;Family:NA;Genus:NA;Species:NA;	2	1	0	0	0	0	0	27	0	0	0	0	0	0	0	0	0	4	0	0	0	1	2	11	0	0	0	3	1	0	8	0	6	0	30	0	0	0	0	0
OTU418	Primary:Bacteria;Phylum:Bacillota;Class:Clostridia;Order:Eubacteriales;Family:Eubacteriales;Genus:NA;Species:NA;	2	5	5	6	4	10	2	11	6	2	5	6	5	6	3	4	2	5	1	1	6	2	4	3	1	1	3	3	0	2	2	4	0	1	1	2	2	1	1	6
OTU419	Primary:Bacteria;Phylum:Bacillota;Class:Clostridia;Order:Eubacteriales;Family:Oscillospiraceae;Genus:NA;Species:NA;	7	6	0	0	22	0	2	17	6	3	0	3	1	0	8	0	0	1	0	9	0	0	11	0	0	1	1	11	0	0	0	0	0	0	17	1	1	0	2	0
OTU42	Primary:Bacteria;Phylum:NA;Class:NA;Order:NA;Family:NA;Genus:NA;Species:NA;	4	6	2	3	11	3	4	3	4	1	6	9	18	7	7	6	12	14	0	7	9	53	235	56	82	32	75	84	71	44	68	38	80	97	41	53	203	39	90	31
OTU421	Primary:Bacteria;Phylum:Bacillota;Class:Clostridia;Order:Eubacteriales;Family:Oscillospiraceae;Genus:Fumia;Species:Fumia_xinanensis;	0	1	1	3	1	2	1	0	0	0	1	2	0	4	0	0	0	3	0	0	1	1	7	2	0	5	3	1	22	2	9	2	2	1	1	0	1	2	0	2
OTU422	Primary:Bacteria;Phylum:Bacillota;Class:Clostridia;Order:Eubacteriales;Family:Oscillospiraceae;Genus:NA;Species:NA;	1	1	9	0	0	0	2	1	0	1	2	0	4	9	0	9	0	1	8	0	0	0	1	6	0	1	2	0	0	0	0	1	0	0	0	2	0	7	1	2
OTU423	Primary:Bacteria;Phylum:Bacillota;Class:Clostridia;Order:Eubacteriales;Family:NA;Genus:NA;Species:NA;	323	135	387	1411	694	421	416	100	212	297	133	67	291	22	5	13	377	399	1	6	141	717	239	20	1275	226	139	55	533	20	67	34	87	243	89	16	16	46	21	30
OTU424	Primary:Bacteria;Phylum:Bacillota;Class:Clostridia;Order:Eubacteriales;Family:NA;Genus:NA;Species:NA;	12	17	0	0	33	0	0	44	3	1	0	3	5	0	14	0	1	1	0	20	0	0	20	2	0	1	1	12	0	0	2	1	0	0	30	0	0	0	0	0
OTU425	Primary:Bacteria;Phylum:Pseudomonadota;Class:Alphaproteobacteria;Order:Rhodospirillales;Family:Kiloniellaceae;Genus:Aestuariispira;Species:Aestuariispira_insulae;	0	0	0	7	0	0	0	0	5	1	0	1	0	0	1	0	0	0	0	0	0	0	5	0	0	0	0	0	0	0	0	0	0	0	0	0	5	0	0	0
OTU426	Primary:Bacteria;Phylum:Bacillota;Class:Clostridia;Order:Eubacteriales;Family:Lachnospiraceae;Genus:Kineothrix;Species:Kineothrix_alysoides;	18	44	33	82	27	73	29	28	82	63	77	153	70	108	60	18	63	51	511	61	78	41	33	42	8	102	75	8	95	52	47	11	79	22	9	26	28	53	7	69
OTU428	Primary:Bacteria;Phylum:Bacillota;Class:Clostridia;Order:Eubacteriales;Family:Lachnospiraceae;Genus:NA;Species:NA;	14	9	1	2	11	1	2	2	9	2	2	6	4	3	13	3	1	6	0	11	3	3	14	2	0	6	1	30	0	1	11	5	1	6	0	1	2	0	0	6
OTU429	Primary:Bacteria;Phylum:Bacillota;Class:Clostridia;Order:Eubacteriales;Family:Oscillospiraceae;Genus:NA;Species:NA;	2	6	0	0	2	0	2	17	0	2	0	4	0	4	1	21	0	2	2	1	0	0	0	0	0	0	0	15	6	1	0	0	4	2	1	1	2	5	0	0
OTU43	Primary:Bacteria;Phylum:Bacteroidota;Class:Bacteroidia;Order:Bacteroidales;Family:Barnesiellaceae;Genus:NA;Species:NA;	63	304	3	5	118	39	55	429	325	68	137	9	385	39	473	2	204	8	4	430	7	25	24	2	10	7	10	84	3	10	2	2	0	2	8	1	1	2	6	0
OTU430	Primary:Bacteria;Phylum:Bacteroidota;Class:Bacteroidia;Order:Bacteroidales;Family:Bacteroidaceae;Genus:Bacteroides;Species:Bacteroides_clarus;	7	8	0	2	2	2	0	1	1	1	0	4	3	0	0	0	0	0	0	2	0	2	2	2	0	4	0	36	4	0	0	0	0	0	0	0	0	1	3	0
OTU431	Primary:Bacteria;Phylum:Bacillota;Class:Clostridia;Order:Eubacteriales;Family:Christensenellaceae;Genus:Christensenella;Species:Christensenella_massiliensis;	3	1	1	3	0	2	0	1	10	1	4	5	2	1	0	2	5	2	8	0	3	6	2	3	1	7	2	1	4	3	0	4	3	4	0	3	0	3	0	2
OTU432	Primary:Bacteria;Phylum:Bacillota;Class:Clostridia;Order:Eubacteriales;Family:Oscillospiraceae;Genus:NA;Species:NA;	6	17	1	0	17	1	1	12	1	5	1	1	1	1	10	1	0	0	0	24	0	0	13	0	0	3	0	6	0	0	1	1	0	0	9	0	4	0	4	3
OTU433	Primary:Bacteria;Phylum:Pseudomonadota;Class:Alphaproteobacteria;Order:Rhodospirillales;Family:NA;Genus:NA;Species:NA;	1	21	0	0	4	5	0	7	4	0	0	1	0	0	2	0	0	1	0	1	0	0	0	1	0	0	0	0	0	0	0	0	2	0	3	0	0	0	0	0
OTU435	Primary:Bacteria;Phylum:Bacteroidota;Class:Bacteroidia;Order:Bacteroidales;Family:Barnesiellaceae;Genus:Coprobacter;Species:Coprobacter_fastidiosus;	5	0	0	0	9	0	0	3	3	0	0	1	1	0	4	0	0	0	0	2	1	1	8	1	4	0	0	3	0	0	1	1	2	0	24	0	0	0	7	0
OTU436	Primary:Bacteria;Phylum:Bacillota;Class:Clostridia;Order:Eubacteriales;Family:Oscillospiraceae;Genus:Vescimonas;Species:NA;	55	53	31	11	30	20	41	17	4	27	6	9	15	16	20	8	28	13	4	9	6	0	0	0	2	0	2	0	1	0	0	0	0	0	0	2	0	0	4	3
OTU437	Primary:Bacteria;Phylum:Bacillota;Class:Clostridia;Order:Eubacteriales;Family:NA;Genus:NA;Species:NA;	62	7	11	66	19	64	146	40	24	8	103	49	28	12	20	7	75	224	6	4	154	213	233	29	189	19	1162	13	51	55	20	155	172	46	20	15	17	43	10	290
OTU438	Primary:Bacteria;Phylum:Bacillota;Class:Clostridia;Order:Eubacteriales;Family:Lachnospiraceae;Genus:NA;Species:NA;	36	62	17	41	68	24	59	53	62	60	39	39	67	157	58	15	71	41	105	42	43	25	66	55	21	29	47	61	29	31	64	22	97	78	6	30	47	59	7	20
OTU439	Primary:Bacteria;Phylum:Pseudomonadota;Class:Betaproteobacteria;Order:Burkholderiales;Family:Sutterellaceae;Genus:Duodenibacillus;Species:Duodenibacillus_massiliensis;	5	4	0	0	6	5	0	13	6	3	0	1	2	0	5	0	0	0	0	10	0	0	12	2	0	1	1	4	3	0	0	0	1	0	5	0	0	0	2	0
OTU44	Primary:Bacteria;Phylum:Bacillota;Class:Clostridia;Order:Eubacteriales;Family:Oscillospiraceae;Genus:Intestinimonas;Species:Intestinimonas_butyriciproducens;	42	13	100	46	99	17	39	58	16	32	56	8	95	38	35	62	20	102	107	22	3	53	49	67	78	43	123	37	20	94	321	176	113	58	97	176	575	265	40	242
OTU440	Primary:Bacteria;Phylum:Bacillota;Class:Clostridia;Order:Eubacteriales;Family:Lachnospiraceae;Genus:NA;Species:NA;	1	1	12	0	2	0	9	2	1	1	4	0	7	0	0	1	4	0	4	0	0	0	2	0	1	1	4	4	0	2	1	4	2	2	4	0	0	8	3	1
OTU441	Primary:Bacteria;Phylum:Bacillota;Class:Clostridia;Order:Eubacteriales;Family:Oscillospiraceae;Genus:Ruminococcus;Species:NA;	3	8	3	3	28	3	1	18	8	0	2	4	0	2	22	4	0	1	0	2	0	0	1	0	0	2	0	3	0	3	2	1	1	0	27	0	4	0	5	0
OTU442	Primary:Bacteria;Phylum:Bacillota;Class:Clostridia;Order:Eubacteriales;Family:Eubacteriaceae;Genus:NA;Species:NA;	1	1	2	5	0	2	2	0	1	7	2	0	1	2	2	2	3	0	0	0	3	2	1	1	0	2	1	0	0	0	6	5	1	1	0	0	2	1	0	1
OTU443	Primary:Bacteria;Phylum:Bacillota;Class:Clostridia;Order:Eubacteriales;Family:Oscillospiraceae;Genus:NA;Species:NA;	1	2	0	0	0	1	0	6	0	0	0	6	0	0	1	0	0	0	0	1	0	2	2	2	0	1	0	0	2	0	0	0	0	2	49	1	1	0	6	0
OTU444	Primary:Bacteria;Phylum:Bacillota;Class:Clostridia;Order:Eubacteriales;Family:Oscillospiraceae;Genus:NA;Species:NA;	0	0	3	1	1	0	3	1	5	0	2	7	3	3	4	2	4	0	4	2	1	2	0	1	0	3	1	0	10	0	4	3	3	0	0	2	0	8	0	1
OTU445	Primary:Bacteria;Phylum:Elusimicrobiota;Class:Elusimicrobia;Order:Elusimicrobiales;Family:Elusimicrobiaceae;Genus:Elusimicrobium;Species:Elusimicrobium_minutum;	0	0	0	0	0	0	0	0	0	0	0	0	0	0	0	0	0	0	0	0	0	0	0	0	0	0	0	0	0	0	0	0	0	0	0	0	0	0	0	0
OTU446	Primary:Bacteria;Phylum:Bacillota;Class:NA;Order:NA;Family:NA;Genus:NA;Species:NA;	8	5	0	0	0	0	0	14	2	1	5	0	0	0	0	1	2	1	0	0	2	5	9	2	5	0	2	2	1	1	0	2	3	10	17	3	10	3	2	0
OTU447	Primary:Bacteria;Phylum:Bacillota;Class:Clostridia;Order:Eubacteriales;Family:NA;Genus:NA;Species:NA;	1	0	0	0	1	0	0	0	1	0	0	2	0	9	1	11	0	1	10	0	0	0	12	0	0	2	2	3	35	4	0	3	0	1	0	0	0	1	0	1
OTU448	Primary:Bacteria;Phylum:Bacillota;Class:Clostridia;Order:Eubacteriales;Family:Oscillospiraceae;Genus:NA;Species:NA;	1	0	0	4	1	4	2	0	1	1	3	1	0	0	0	0	2	1	2	0	0	4	1	3	1	1	1	0	3	2	1	5	2	3	1	2	8	1	0	3
OTU449	Primary:Bacteria;Phylum:Bacillota;Class:Clostridia;Order:Eubacteriales;Family:Christensenellaceae;Genus:Guopingia;Species:Guopingia_tenuis;	3	0	0	2	2	2	0	0	3	4	3	0	4	2	0	3	1	2	1	0	2	3	1	5	6	0	1	0	0	1	1	0	0	1	0	3	2	5	0	1
OTU45	Primary:Bacteria;Phylum:Bacteroidota;Class:Bacteroidia;Order:Bacteroidales;Family:Barnesiellaceae;Genus:Coprobacter;Species:NA;	387	0	1	23	487	4	5	701	478	30	5	68	45	6	311	2	1	1	0	460	4	29	58	17	11	46	16	4	33	4	8	1	0	0	46	3	28	4	17	0
OTU450	Primary:Bacteria;Phylum:Bacillota;Class:Clostridia;Order:Eubacteriales;Family:Oscillospiraceae;Genus:NA;Species:NA;	1	3	0	2	0	7	10	1	3	3	2	3	0	1	0	1	1	2	4	0	2	2	0	2	3	1	0	1	3	2	0	4	0	2	0	2	2	1	0	3
OTU451	Primary:Bacteria;Phylum:Bacillota;Class:Clostridia;Order:Eubacteriales;Family:Oscillospiraceae;Genus:NA;Species:NA;	0	1	1	1	3	0	12	0	0	0	3	12	0	0	10	5	0	0	3	2	0	0	8	0	0	0	0	0	0	0	1	2	7	3	0	0	0	25	0	0
OTU453	Primary:Bacteria;Phylum:Bacillota;Class:Clostridia;Order:Eubacteriales;Family:Christensenellaceae;Genus:NA;Species:NA;	5	6	0	0	9	0	2	6	5	3	2	0	1	0	0	4	1	2	0	6	0	0	2	6	1	2	0	0	1	0	0	1	1	0	8	1	0	0	0	1
OTU454	Primary:Bacteria;Phylum:Bacillota;Class:Clostridia;Order:Eubacteriales;Family:Oscillospiraceae;Genus:NA;Species:NA;	1	0	1	0	1	0	1	0	0	6	0	0	1	1	0	0	4	0	1	0	8	2	1	0	2	5	3	0	0	2	0	1	2	0	0	0	0	1	0	1
OTU455	Primary:Bacteria;Phylum:Bacillota;Class:Clostridia;Order:Eubacteriales;Family:Oscillospiraceae;Genus:NA;Species:NA;	3	2	2	0	3	1	1	1	10	0	1	1	1	5	3	4	0	0	2	0	0	0	2	1	0	0	0	0	0	0	0	1	0	0	2	2	5	0	6	5
OTU456	Primary:Bacteria;Phylum:Bacillota;Class:Clostridia;Order:Eubacteriales;Family:Oscillospiraceae;Genus:NA;Species:NA;	2	2	1	0	0	2	0	0	3	0	2	7	1	0	0	1	0	0	0	0	0	2	1	1	0	0	1	0	0	2	0	5	2	3	1	6	5	1	1	6
OTU457	Primary:Bacteria;Phylum:Bacteroidota;Class:Bacteroidia;Order:Bacteroidales;Family:NA;Genus:NA;Species:NA;	4	2	0	0	9	0	2	7	9	0	1	4	1	0	12	0	1	0	0	28	0	0	7	0	0	4	0	6	0	1	2	0	0	0	3	0	0	0	9	0
OTU458	Primary:Bacteria;Phylum:Bacillota;Class:Clostridia;Order:Eubacteriales;Family:NA;Genus:NA;Species:NA;	9	11	0	0	4	0	0	3	2	0	1	4	1	0	4	0	0	0	0	15	0	0	11	0	0	0	0	2	0	0	0	0	0	0	3	1	0	0	0	0
OTU459	Primary:Bacteria;Phylum:Bacillota;Class:Clostridia;Order:Eubacteriales;Family:Oscillospiraceae;Genus:NA;Species:NA;	3	3	3	1	3	1	0	5	5	1	6	1	1	2	0	7	0	4	8	3	1	3	3	0	0	1	2	2	0	2	6	11	2	0	1	14	12	12	0	11
OTU46	Primary:Bacteria;Phylum:Bacteroidota;Class:Bacteroidia;Order:Bacteroidales;Family:NA;Genus:NA;Species:NA;	0	23	1	17	8	0	0	0	0	41	0	3	23	0	65	0	0	44	3	0	0	111	2524	8	13	31	11	6	11	24	9	3	19	3	1134	14	36	2	244	1
OTU460	Primary:Bacteria;Phylum:Bacillota;Class:Bacilli;Order:Lactobacillales;Family:Lactobacillaceae;Genus:Ligilactobacillus;Species:NA;	5	7	5	19	6	15	3	9	5	6	2	8	4	1	2	3	4	0	6	22	0	0	0	0	0	0	0	0	3	0	0	0	0	0	0	3	0	0	1	1
OTU461	Primary:Bacteria;Phylum:Bacillota;Class:Clostridia;Order:Eubacteriales;Family:Oscillospiraceae;Genus:NA;Species:NA;	3	5	11	1	15	1	4	14	2	1	0	3	4	0	6	6	1	2	2	11	0	0	6	1	0	2	1	26	0	1	6	1	2	2	25	2	5	5	7	4
OTU462	Primary:Bacteria;Phylum:Bacillota;Class:Clostridia;Order:Eubacteriales;Family:Oscillospiraceae;Genus:Paludihabitans;Species:Paludihabitans_psychrotolerans;	2	0	9	0	0	0	1	0	9	1	5	5	0	0	0	6	0	2	1	0	0	2	0	2	0	1	0	1	0	0	8	1	1	2	1	0	0	7	1	3
OTU463	Primary:Bacteria;Phylum:Bacillota;Class:Clostridia;Order:Eubacteriales;Family:Oscillospiraceae;Genus:NA;Species:NA;	2	0	1	1	1	3	2	0	0	0	0	12	0	0	1	2	0	0	0	7	0	2	1	1	2	0	1	0	1	1	3	6	0	0	3	0	1	2	0	1
OTU464	Primary:Bacteria;Phylum:Bacillota;Class:Clostridia;Order:Eubacteriales;Family:Oscillospiraceae;Genus:Hydrogeniiclostridium;Species:Hydrogeniiclostridium_mannosilyticum;	2	1	2	0	3	0	3	0	1	1	4	0	4	4	0	6	1	1	7	3	0	1	0	4	0	3	2	0	4	4	2	1	4	3	3	3	1	7	0	12
OTU465	Primary:Bacteria;Phylum:Bacillota;Class:NA;Order:NA;Family:NA;Genus:NA;Species:NA;	15	7	6	20	7	49	4	7	11	3	2	12	1	2	1	0	13	3	2	0	7	12	16	7	7	4	3	1	6	5	14	66	8	1	23	27	5	5	1	4
OTU466	Primary:Bacteria;Phylum:Bacillota;Class:Clostridia;Order:Eubacteriales;Family:Oscillospiraceae;Genus:NA;Species:NA;	4	3	11	5	3	4	17	10	1	8	2	5	1	5	13	4	2	3	5	2	0	0	0	0	1	0	1	0	1	0	0	0	0	0	0	0	0	0	3	0
OTU467	Primary:Bacteria;Phylum:NA;Class:NA;Order:NA;Family:NA;Genus:NA;Species:NA;	7	1	3	7	3	0	5	0	15	10	5	1	0	0	0	0	16	3	0	0	0	0	2	2	1	0	1	0	1	0	0	1	0	1	1	2	0	0	0	0
OTU468	Primary:Bacteria;Phylum:Bacillota;Class:Clostridia;Order:Eubacteriales;Family:Oscillospiraceae;Genus:NA;Species:NA;	143	194	560	12	124	6	37	705	252	152	327	701	466	128	177	4980	15	126	255	61	11	56	97	26	4	37	145	14	15	202	490	1264	120	63	69	514	390	193	68	1123
OTU469	Primary:Bacteria;Phylum:Bacillota;Class:Clostridia;Order:Eubacteriales;Family:Lachnospiraceae;Genus:NA;Species:NA;	0	1	0	1	4	0	0	1	0	1	1	3	0	3	1	3	0	1	1	1	1	4	3	2	1	1	1	0	0	0	5	3	5	1	2	2	3	4	0	7
OTU47	Primary:Bacteria;Phylum:Pseudomonadota;Class:Gammaproteobacteria;Order:Enterobacterales;Family:Enterobacteriaceae;Genus:Escherichia;Species:NA;	12	89	126	14	1	4	102	13	3	50	41	37	46	12	11	13	209	208	19	23	10	4	7	2	25	50	6	1	16	29	95	28	1	0	70	16	13	23	3928	15
OTU470	Primary:Bacteria;Phylum:Bacillota;Class:Clostridia;Order:Eubacteriales;Family:Lachnospiraceae;Genus:Blautia;Species:NA;	5	3	5	5	10	1	4	14	9	3	7	20	8	18	14	2	3	9	1	10	3	6	8	6	0	1	1	10	2	6	8	4	3	11	0	5	4	3	5	0
OTU471	Primary:Bacteria;Phylum:Bacillota;Class:Clostridia;Order:Eubacteriales;Family:NA;Genus:NA;Species:NA;	0	26	0	0	7	0	0	15	0	0	0	3	1	0	18	0	0	1	1	1	0	0	3	0	0	0	1	0	6	1	0	1	0	0	0	0	0	0	0	0
OTU472	Primary:Bacteria;Phylum:Bacillota;Class:Negativicutes;Order:Veillonellales;Family:Veillonellaceae;Genus:Megasphaera;Species:Megasphaera_elsdenii;	3	3	6	9	1	7	3	4	3	16	4	4	0	1	2	0	6	10	5	1	4	0	0	0	0	0	0	0	0	6	0	0	0	1	1	0	0	0	0	0
OTU473	Primary:Bacteria;Phylum:Pseudomonadota;Class:Deltaproteobacteria;Order:NA;Family:NA;Genus:NA;Species:NA;	0	8	0	2	14	3	0	0	0	0	0	3	0	1	0	1	0	0	0	2	1	0	0	13	0	0	0	1	0	0	2	1	2	0	4	0	1	0	0	0
OTU476	Primary:Bacteria;Phylum:Bacillota;Class:Clostridia;Order:Eubacteriales;Family:Oscillospiraceae;Genus:NA;Species:NA;	1	4	7	2	2	0	3	2	3	0	2	0	3	0	5	4	0	5	2	3	0	1	1	0	0	0	2	0	1	2	1	1	0	0	0	1	3	2	0	4
OTU477	Primary:Bacteria;Phylum:Bacillota;Class:Clostridia;Order:Eubacteriales;Family:NA;Genus:NA;Species:NA;	3	13	0	0	28	0	0	11	4	1	0	0	3	0	11	0	0	0	0	0	0	0	9	0	0	1	0	1	0	0	0	0	0	0	3	0	1	0	2	0
OTU478	Primary:Bacteria;Phylum:Bacillota;Class:Clostridia;Order:Eubacteriales;Family:NA;Genus:NA;Species:NA;	0	0	2	1	2	0	0	0	8	1	2	5	3	9	8	2	1	2	0	1	1	1	6	1	3	5	1	0	2	1	2	3	2	3	2	1	2	2	0	2
OTU479	Primary:Bacteria;Phylum:Bacillota;Class:Clostridia;Order:Eubacteriales;Family:Oscillospiraceae;Genus:Anaeromassilibacillus;Species:Anaeromassilibacillus_senegalensis;	0	11	19	0	2	1	1	3	1	2	0	4	2	1	3	11	0	2	0	5	0	0	0	0	0	0	1	2	0	0	4	2	1	6	0	3	0	1	0	1
OTU48	Primary:Bacteria;Phylum:Bacillota;Class:Clostridia;Order:Eubacteriales;Family:Lachnospiraceae;Genus:NA;Species:NA;	52	22	75	95	28	142	53	21	100	68	69	48	15	1	0	38	23	38	1	0	31	137	78	72	157	53	103	6	792	92	140	50	71	13	31	132	44	68	9	32
OTU480	Primary:Bacteria;Phylum:Bacillota;Class:Clostridia;Order:Eubacteriales;Family:NA;Genus:NA;Species:NA;	0	0	0	1	0	3	1	7	3	16	0	0	0	0	0	0	0	4	0	12	0	0	2	0	0	0	0	1	0	0	0	0	0	0	10	0	0	0	0	0
OTU481	Primary:Bacteria;Phylum:Bacillota;Class:Clostridia;Order:Eubacteriales;Family:NA;Genus:NA;Species:NA;	15	38	332	90	76	48	464	519	23	274	121	94	298	61	62	232	381	28	10	19	128	61	123	57	100	141	70	115	81	23	97	40	51	45	6	43	9	194	11	267
OTU482	Primary:Bacteria;Phylum:NA;Class:NA;Order:NA;Family:NA;Genus:NA;Species:NA;	0	0	0	1	0	0	0	0	0	4	0	25	0	0	7	0	0	0	0	0	0	0	8	1	0	0	0	0	2	2	3	1	0	0	0	0	0	0	0	0
OTU483	Primary:Bacteria;Phylum:Bacillota;Class:Clostridia;Order:Eubacteriales;Family:Christensenellaceae;Genus:NA;Species:NA;	0	1	1	3	3	0	0	1	1	0	0	1	0	3	1	0	0	4	7	3	2	1	0	1	3	1	0	0	1	15	0	1	1	1	0	7	2	3	0	0
OTU484	Primary:Bacteria;Phylum:NA;Class:NA;Order:NA;Family:NA;Genus:NA;Species:NA;	0	0	0	0	0	0	0	0	1	0	0	26	1	0	13	0	0	0	0	0	0	0	0	1	0	1	0	0	0	0	0	0	0	0	1	0	0	0	0	0
OTU485	Primary:Bacteria;Phylum:Actinomycetota;Class:Actinobacteria;Order:Pseudonocardiales;Family:Pseudonocardiaceae;Genus:NA;Species:NA;	2	0	1	0	0	0	0	0	1	0	1	0	1	0	0	0	0	0	0	0	0	1	0	0	15	0	0	0	3	0	20	0	0	0	4	1	1	1	20	3
OTU486	Primary:Bacteria;Phylum:Bacillota;Class:Clostridia;Order:Eubacteriales;Family:Oscillospiraceae;Genus:NA;Species:NA;	1	1	2	2	1	1	0	0	1	3	1	1	2	1	0	12	1	0	0	1	2	0	1	0	1	1	0	0	1	0	2	8	0	0	0	0	0	4	0	0
OTU487	Primary:Bacteria;Phylum:Bacillota;Class:Clostridia;Order:Eubacteriales;Family:Oscillospiraceae;Genus:NA;Species:NA;	1	2	1	0	3	0	3	1	4	0	5	4	0	2	1	3	0	1	5	0	0	0	1	0	0	0	0	0	0	3	1	13	2	2	4	3	8	3	3	3
OTU488	Primary:Bacteria;Phylum:Bacillota;Class:Clostridia;Order:Eubacteriales;Family:Oscillospiraceae;Genus:NA;Species:NA;	1	1	2	3	6	2	4	5	7	1	5	1	5	5	0	6	10	4	0	1	1	5	2	2	4	1	2	0	1	1	3	0	0	7	1	2	2	0	0	0
OTU489	Primary:Bacteria;Phylum:Bacillota;Class:Clostridia;Order:Eubacteriales;Family:Eubacteriales_incertae_sedis;Genus:Lentihominibacter;Species:Lentihominibacter_hominis;	5	6	1	1	0	1	2	2	5	1	1	0	4	0	0	1	1	2	1	0	1	0	6	0	0	6	2	0	15	0	0	1	1	1	2	1	2	0	0	2
OTU49	Primary:Bacteria;Phylum:Bacillota;Class:Clostridia;Order:Eubacteriales;Family:Oscillospiraceae;Genus:Agathobaculum;Species:Agathobaculum_faecis;	186	259	108	130	125	16	112	145	122	70	189	314	141	53	89	42	144	119	184	134	185	149	250	108	103	117	439	56	163	60	514	243	459	242	104	103	393	776	118	374
OTU490	Primary:Bacteria;Phylum:Bacillota;Class:Clostridia;Order:Eubacteriales;Family:NA;Genus:NA;Species:NA;	12	2	1	2	3	3	2	2	4	4	1	0	0	0	4	0	0	2	0	7	0	0	1	0	0	0	2	0	0	4	0	0	0	0	5	0	1	0	7	0
OTU491	Primary:Bacteria;Phylum:Bacillota;Class:Clostridia;Order:Eubacteriales;Family:Oscillospiraceae;Genus:Lawsonibacter;Species:NA;	9	19	53	1	17	4	10	21	5	6	4	3	4	8	3	24	2	13	9	5	1	4	5	2	1	2	13	8	1	4	2	7	7	1	22	4	16	26	19	19
OTU492	Primary:Bacteria;Phylum:Bacillota;Class:Erysipelotrichia;Order:Erysipelotrichales;Family:Turicibacteraceae;Genus:Turicibacter;Species:Turicibacter_bilis;	1	5	2	5	0	2	4	0	3	4	1	2	1	2	1	0	0	6	1	2	4	0	0	0	0	0	0	0	0	0	5	2	0	0	0	0	0	0	0	0
OTU494	Primary:Bacteria;Phylum:Bacillota;Class:Clostridia;Order:Eubacteriales;Family:NA;Genus:NA;Species:NA;	2	2	2	3	4	0	1	0	3	2	0	1	3	1	3	0	2	2	5	5	0	1	0	5	1	2	1	4	3	1	4	2	3	1	5	2	1	1	3	2
OTU496	Primary:Bacteria;Phylum:Bacillota;Class:Clostridia;Order:Eubacteriales;Family:Oscillospiraceae;Genus:NA;Species:NA;	0	0	0	1	5	0	0	0	0	0	0	0	1	0	0	0	0	15	0	0	0	3	0	0	0	1	1	0	0	1	3	14	0	0	1	2	3	0	0	20
OTU497	Primary:Bacteria;Phylum:Bacillota;Class:Clostridia;Order:Eubacteriales;Family:NA;Genus:NA;Species:NA;	25	62	0	4	24	4	0	48	37	8	1	6	0	0	17	1	0	2	0	63	0	0	19	4	1	1	0	4	2	0	0	1	0	2	27	2	3	0	0	0
OTU498	Primary:Bacteria;Phylum:Bacillota;Class:Clostridia;Order:Eubacteriales;Family:Oscillospiraceae;Genus:NA;Species:NA;	8	11	5	1	0	3	5	1	1	1	0	5	0	1	0	1	8	0	0	0	1	0	6	4	1	1	1	2	0	3	3	0	4	0	0	4	2	4	0	0
OTU499	Primary:Bacteria;Phylum:NA;Class:NA;Order:NA;Family:NA;Genus:NA;Species:NA;	1	0	0	0	1	0	0	0	0	0	0	0	1	0	0	0	0	0	1	0	1	3	6	0	0	0	0	1	1	0	2	1	0	3	0	0	1	1	2	0
OTU5	Primary:Bacteria;Phylum:Bacillota;Class:Clostridia;Order:Eubacteriales;Family:Lachnospiraceae;Genus:NA;Species:NA;	300	285	530	203	217	103	622	400	728	232	728	691	869	898	1169	150	1105	477	549	249	791	380	268	214	24	1462	460	89	411	464	623	145	268	105	92	732	139	318	112	1192
OTU50	Primary:Bacteria;Phylum:Pseudomonadota;Class:Deltaproteobacteria;Order:NA;Family:NA;Genus:NA;Species:NA;	134	144	17	28	579	16	22	121	28	11	24	39	21	72	88	186	28	13	12	11	62	14	39	157	8	22	22	8	11	21	127	100	116	23	438	11	37	23	17	13
OTU500	Primary:Bacteria;Phylum:Bacillota;Class:Clostridia;Order:Eubacteriales;Family:Oscillospiraceae;Genus:NA;Species:NA;	0	0	1	0	3	0	0	2	0	0	1	5	1	1	1	2	0	0	14	2	0	0	1	0	4	1	0	1	1	0	0	2	0	2	0	0	1	0	0	3
OTU501	Primary:Bacteria;Phylum:Bacteroidota;Class:Bacteroidia;Order:Bacteroidales;Family:Barnesiellaceae;Genus:Barnesiella;Species:Barnesiella_viscericola;	16	0	0	1	0	0	1	5	8	1	1	3	3	2	0	0	0	0	0	10	1	2	8	0	0	3	0	17	3	0	1	1	2	0	37	0	1	0	19	0
OTU503	Primary:Bacteria;Phylum:Bacillota;Class:NA;Order:NA;Family:NA;Genus:NA;Species:NA;	1	5	0	1	2	15	1	0	2	0	2	1	0	7	7	0	0	0	0	0	3	0	1	0	0	0	0	0	15	0	0	1	1	0	0	0	0	0	0	1
OTU504	Primary:Bacteria;Phylum:Spirochaetota;Class:Spirochaetia;Order:Spirochaetales;Family:Treponemataceae;Genus:Treponema;Species:Treponema_brennaborense;	0	5	0	0	1	0	10	0	0	3	0	1	0	0	0	0	0	4	0	3	3	0	0	0	0	1	0	0	0	1	0	0	0	0	8	0	0	0	0	1
OTU505	Primary:Bacteria;Phylum:Bacillota;Class:Clostridia;Order:Eubacteriales;Family:Oscillospiraceae;Genus:NA;Species:NA;	1	0	0	0	1	5	2	1	0	0	6	3	0	0	0	6	2	1	0	0	0	1	0	1	0	0	1	1	6	3	3	1	1	0	0	2	5	3	1	4
OTU506	Primary:Bacteria;Phylum:Lentisphaerota;Class:Lentisphaeria;Order:Victivallales;Family:Victivallaceae;Genus:Victivallis;Species:Victivallis_lenta;	2	0	0	1	1	0	0	1	0	0	0	0	0	0	0	0	0	0	0	2	0	0	4	0	0	1	0	1	1	0	0	0	1	0	30	1	0	0	12	0
OTU507	Primary:Bacteria;Phylum:Bacillota;Class:Clostridia;Order:Eubacteriales;Family:Oscillospiraceae;Genus:NA;Species:NA;	4	1	1	4	3	0	0	0	0	1	4	1	2	0	9	2	0	2	0	1	2	0	10	0	0	1	1	0	0	0	7	0	1	7	0	0	2	0	0	1
OTU508	Primary:Bacteria;Phylum:Bacillota;Class:Clostridia;Order:Eubacteriales;Family:Oscillospiraceae;Genus:NA;Species:NA;	6	5	0	0	18	0	0	15	3	2	0	0	1	1	12	0	0	1	1	10	0	0	5	0	0	1	0	3	0	0	0	1	0	1	5	0	3	0	4	5
OTU509	Primary:Bacteria;Phylum:Bacillota;Class:Clostridia;Order:Eubacteriales;Family:Oscillospiraceae;Genus:NA;Species:NA;	0	0	2	0	3	0	3	4	2	2	4	0	0	1	1	13	4	0	5	0	0	2	1	0	1	0	1	0	0	3	4	0	0	0	1	8	5	2	0	1
OTU51	Primary:Bacteria;Phylum:Actinomycetota;Class:Coriobacteriia;Order:Eggerthellales;Family:Eggerthellaceae;Genus:NA;Species:NA;	46	34	57	29	43	27	75	28	46	83	47	63	102	106	55	90	131	64	30	12	23	29	55	66	27	150	68	10	173	116	220	128	132	113	14	61	86	67	6	60
OTU510	Primary:Bacteria;Phylum:Bacillota;Class:Clostridia;Order:Eubacteriales;Family:Oscillospiraceae;Genus:NA;Species:NA;	2	0	1	0	0	0	1	0	0	0	1	2	0	7	1	0	1	0	0	0	0	0	0	0	0	0	0	0	1	9	12	0	1	0	0	3	0	0	0	4
OTU511	Primary:Bacteria;Phylum:Bacillota;Class:Clostridia;Order:Eubacteriales;Family:NA;Genus:NA;Species:NA;	0	10	0	2	9	4	0	0	0	4	0	0	12	6	0	2	0	8	0	1	2	0	0	0	0	1	0	1	0	0	0	0	0	0	0	0	0	0	0	2
OTU512	Primary:Bacteria;Phylum:Bacillota;Class:Clostridia;Order:Eubacteriales;Family:Oscillospiraceae;Genus:NA;Species:NA;	0	2	0	0	6	0	0	0	1	0	2	3	1	1	0	3	0	1	1	0	0	0	0	1	0	0	0	1	1	0	1	6	0	0	1	2	4	0	0	1
OTU513	Primary:Bacteria;Phylum:Bacillota;Class:Clostridia;Order:Eubacteriales;Family:NA;Genus:NA;Species:NA;	1	1	2	1	1	0	2	1	0	0	1	3	3	0	1	3	0	0	1	3	5	1	1	0	0	2	0	1	5	1	3	0	0	0	0	2	0	0	0	4
OTU514	Primary:Bacteria;Phylum:Pseudomonadota;Class:Alphaproteobacteria;Order:NA;Family:NA;Genus:NA;Species:NA;	4	10	1	1	8	1	0	3	0	0	0	0	0	0	0	1	0	0	0	1	0	0	3	0	0	0	0	3	1	0	0	1	1	0	19	0	2	0	1	1
OTU516	Primary:Bacteria;Phylum:Bacillota;Class:Clostridia;Order:Eubacteriales;Family:Oscillospiraceae;Genus:NA;Species:NA;	1	1	3	0	3	0	0	2	4	0	1	4	1	0	4	1	0	4	3	4	3	0	3	0	0	0	0	1	0	3	0	0	1	0	1	1	3	2	0	5
OTU517	Primary:Bacteria;Phylum:Bacillota;Class:Clostridia;Order:Eubacteriales;Family:Oscillospiraceae;Genus:NA;Species:NA;	0	0	0	2	1	0	0	1	0	1	0	0	0	0	1	0	0	1	0	2	0	0	0	0	0	0	0	0	0	1	0	0	0	0	33	0	1	0	2	0
OTU518	Primary:Bacteria;Phylum:Bacillota;Class:Clostridia;Order:Eubacteriales;Family:Christensenellaceae;Genus:Beduinibacterium;Species:Beduinibacterium_massiliense;	0	11	2	0	2	1	3	0	1	1	1	6	1	1	0	1	0	0	1	1	0	2	0	0	0	1	3	0	0	1	4	6	0	2	3	6	0	1	0	0
OTU519	Primary:Bacteria;Phylum:Bacillota;Class:Clostridia;Order:Eubacteriales;Family:Oscillospiraceae;Genus:Anaerotruncus;Species:Anaerotruncus_rubiinfantis;	11	14	0	2	17	0	1	11	6	2	1	1	2	0	12	0	0	0	0	15	0	1	10	0	0	1	0	16	0	0	1	0	0	0	11	2	0	0	5	1
OTU52	Primary:Bacteria;Phylum:Bacillota;Class:Erysipelotrichia;Order:Erysipelotrichales;Family:Coprobacillaceae;Genus:Thomasclavelia;Species:Thomasclavelia_spiroformis;	178	39	30	45	11	2	50	47	5	95	7	28	10	55	54	7	26	27	73	72	67	7	88	39	26	23	42	98	59	32	112	35	98	42	2	30	39	63	41	16
OTU521	Primary:Bacteria;Phylum:Bacillota;Class:NA;Order:NA;Family:NA;Genus:NA;Species:NA;	32	4	4	41	8	73	6	2	0	24	5	5	2	3	12	6	2	7	7	0	31	18	23	23	30	0	29	1	1	20	3	14	0	55	4	7	1	10	7	27
OTU522	Primary:Bacteria;Phylum:Bacillota;Class:Clostridia;Order:Eubacteriales;Family:Oscillospiraceae;Genus:NA;Species:NA;	7	17	4	0	23	0	2	10	4	2	2	1	3	5	15	7	0	2	0	20	0	1	13	0	0	1	0	5	1	1	0	0	0	1	1	1	5	1	1	1
OTU523	Primary:Bacteria;Phylum:Bacillota;Class:NA;Order:NA;Family:NA;Genus:NA;Species:NA;	9	6	0	2	1	1	1	13	4	2	0	0	1	0	0	0	0	0	0	2	0	1	1	0	0	1	0	5	1	0	2	0	0	0	19	0	2	0	12	0
OTU524	Primary:Bacteria;Phylum:Lentisphaerota;Class:Lentisphaeria;Order:Victivallales;Family:Victivallaceae;Genus:Victivallis;Species:NA;	0	1	0	0	0	0	0	0	0	1	0	0	0	0	1	0	0	0	0	0	0	0	1	0	0	0	0	0	0	0	1	0	0	0	19	0	3	0	10	0
OTU527	Primary:Bacteria;Phylum:Bacillota;Class:Clostridia;Order:Eubacteriales;Family:Christensenellaceae;Genus:Beduinibacterium;Species:Beduinibacterium_massiliense;	1	0	1	1	2	0	0	1	2	1	1	1	7	0	1	8	0	2	8	0	1	1	5	1	0	0	1	0	1	0	0	0	0	0	3	0	0	6	0	1
OTU528	Primary:Bacteria;Phylum:Bacillota;Class:Clostridia;Order:Eubacteriales;Family:Oscillospiraceae;Genus:NA;Species:NA;	0	1	1	1	0	2	0	0	1	0	0	3	0	2	1	1	3	0	1	0	0	1	2	2	1	0	2	1	0	0	4	1	1	2	0	1	0	2	0	1
OTU529	Primary:Bacteria;Phylum:Bacillota;Class:Clostridia;Order:Eubacteriales;Family:Oscillospiraceae;Genus:NA;Species:NA;	0	0	1	0	1	0	0	0	0	1	0	0	1	0	0	0	1	0	0	0	0	0	1	0	0	0	0	1	0	0	1	0	0	0	1	0	0	0	27	0
OTU53	Primary:Bacteria;Phylum:Bacillota;Class:Clostridia;Order:Eubacteriales;Family:Lachnospiraceae;Genus:Anaerotignum;Species:Anaerotignum_faecicola;	50	34	63	28	39	31	12	97	57	23	120	149	36	56	46	272	4	143	69	15	4	27	24	22	12	21	15	43	17	14	606	688	215	107	143	269	912	775	68	245
OTU530	Primary:Bacteria;Phylum:Bacillota;Class:Clostridia;Order:Eubacteriales;Family:Lachnospiraceae;Genus:Sellimonas;Species:NA;	294	213	140	49	161	51	89	377	116	153	116	199	236	158	697	100	175	184	331	282	294	112	280	64	30	65	139	370	136	177	158	60	178	132	37	88	91	152	35	36
OTU531	Primary:Bacteria;Phylum:Bacteroidota;Class:Bacteroidia;Order:Bacteroidales;Family:Rikenellaceae;Genus:Alistipes;Species:Alistipes_onderdonkii;	91	48	0	5	129	8	4	60	18	9	0	5	7	0	36	0	1	13	1	51	0	0	31	1	1	2	0	43	1	0	0	0	1	0	94	1	1	1	49	0
OTU532	Primary:Bacteria;Phylum:Bacillota;Class:Clostridia;Order:Eubacteriales;Family:Oscillospiraceae;Genus:Lawsonibacter;Species:NA;	7	10	5	2	20	2	5	16	19	6	3	3	3	5	6	14	1	1	17	15	0	1	18	0	1	2	2	7	1	1	1	3	0	0	19	0	11	15	17	10
OTU533	Primary:Bacteria;Phylum:Pseudomonadota;Class:Deltaproteobacteria;Order:Desulfovibrionales;Family:Desulfovibrionaceae;Genus:NA;Species:NA;	9	9	0	0	17	5	3	3	5	4	2	0	1	34	9	1	5	2	2	9	0	6	1	1	0	2	3	4	3	1	1	3	1	0	0	0	6	4	4	2
OTU534	Primary:Bacteria;Phylum:Bacillota;Class:Clostridia;Order:Eubacteriales;Family:Lachnospiraceae;Genus:NA;Species:NA;	828	438	122	211	330	216	217	830	208	254	196	453	306	186	1857	196	515	221	615	659	669	248	752	172	57	268	190	567	190	506	329	131	370	144	35	111	209	327	24	131
OTU535	Primary:Bacteria;Phylum:Bacillota;Class:Erysipelotrichia;Order:Erysipelotrichales;Family:NA;Genus:NA;Species:NA;	0	0	1	0	0	0	0	0	0	0	34	0	0	0	0	0	0	0	1	0	0	0	0	0	1	1	1	0	0	10	1	0	0	0	0	0	0	0	0	0
OTU536	Primary:Bacteria;Phylum:Bacillota;Class:Clostridia;Order:Eubacteriales;Family:Oscillospiraceae;Genus:Butyricicoccus;Species:Butyricicoccus_intestinisimiae;	1	3	3	5	0	1	1	0	1	6	4	0	0	2	1	0	6	3	2	4	3	0	0	0	0	0	0	0	0	1	0	1	0	0	0	0	0	0	0	0
OTU537	Primary:Bacteria;Phylum:Bacillota;Class:Clostridia;Order:Eubacteriales;Family:Oscillospiraceae;Genus:NA;Species:NA;	13	2	6	0	3	15	2	0	1	0	1	0	0	0	0	6	1	0	0	0	0	1	1	1	0	1	2	0	0	1	0	2	0	3	0	1	0	0	0	0
OTU539	Primary:Bacteria;Phylum:Bacillota;Class:Clostridia;Order:Eubacteriales;Family:NA;Genus:NA;Species:NA;	0	3	0	1	5	0	0	6	3	2	0	0	1	1	5	0	0	0	0	8	0	0	10	0	0	2	0	3	0	0	0	0	0	0	2	0	0	0	2	0
OTU54	Primary:Bacteria;Phylum:Bacillota;Class:Clostridia;Order:Eubacteriales;Family:Oscillospiraceae;Genus:Intestinimonas;Species:Intestinimonas_massiliensis;	146	158	119	86	64	47	47	199	67	36	405	63	47	83	100	672	25	40	202	26	58	41	54	42	24	36	148	84	5	31	31	91	72	389	149	76	218	34	129	2205
OTU541	Primary:Bacteria;Phylum:Bacillota;Class:Clostridia;Order:Eubacteriales;Family:Oscillospiraceae;Genus:Paludihabitans;Species:Paludihabitans_psychrotolerans;	1	0	0	1	0	0	0	0	2	0	3	1	0	1	0	1	15	2	0	0	0	3	1	8	0	0	2	0	2	0	6	17	2	1	0	2	1	2	0	2
OTU542	Primary:Bacteria;Phylum:Bacillota;Class:Clostridia;Order:Eubacteriales;Family:Oscillospiraceae;Genus:NA;Species:NA;	0	2	1	0	2	0	2	5	4	2	1	1	1	1	0	13	0	2	0	0	0	1	1	0	0	1	2	0	0	2	1	13	0	1	2	2	5	1	0	5
OTU545	Primary:Bacteria;Phylum:Bacillota;Class:Clostridia;Order:Eubacteriales;Family:Oscillospiraceae;Genus:NA;Species:NA;	3	1	2	0	2	0	1	0	4	0	0	0	2	0	1	1	0	4	3	2	0	0	2	0	1	0	0	2	3	0	0	0	2	0	1	1	0	10	0	0
OTU547	Primary:Bacteria;Phylum:Bacillota;Class:Clostridia;Order:Eubacteriales;Family:Christensenellaceae;Genus:Guopingia;Species:Guopingia_tenuis;	0	3	1	3	0	1	1	1	3	1	1	2	2	0	2	3	1	1	2	0	2	2	1	3	0	0	4	0	4	0	0	6	1	0	1	2	4	1	0	1
OTU548	Primary:Bacteria;Phylum:Bacillota;Class:Clostridia;Order:Eubacteriales;Family:Oscillospiraceae;Genus:NA;Species:NA;	1	1	1	3	3	3	0	0	1	3	1	5	0	0	0	0	1	0	1	0	0	0	2	2	1	2	6	0	1	2	1	0	0	4	0	1	2	0	0	0
OTU549	Primary:Bacteria;Phylum:Bacillota;Class:Clostridia;Order:Eubacteriales;Family:Lachnospiraceae;Genus:Anaerotignum;Species:NA;	2	4	3	0	2	0	0	4	1	2	6	0	4	4	3	6	0	3	11	4	0	1	2	0	0	1	0	3	1	0	6	17	4	0	8	1	7	4	3	7
OTU55	Primary:Bacteria;Phylum:Bacillota;Class:Clostridia;Order:Eubacteriales;Family:NA;Genus:NA;Species:NA;	43	55	74	51	89	102	125	56	54	81	14	13	67	60	34	59	94	78	1	2	136	282	57	226	67	531	48	13	32	32	70	34	62	128	12	100	5	7	6	41
OTU550	Primary:Bacteria;Phylum:Bacillota;Class:Erysipelotrichia;Order:Erysipelotrichales;Family:Erysipelotrichaceae;Genus:NA;Species:NA;	3	1	5	6	0	0	1	0	0	2	0	0	0	0	0	0	0	1	0	0	0	3	3	1	2	0	0	0	0	0	1	0	0	3	0	1	0	0	0	4
OTU552	Primary:Bacteria;Phylum:Bacillota;Class:Clostridia;Order:Eubacteriales;Family:Oscillospiraceae;Genus:Faecalibacterium;Species:NA;	37	92	266	17	102	4	23	131	45	324	214	16	163	22	220	2	7	17	35	404	8	4	78	5	3	60	25	236	82	46	8	6	4	9	24	3	30	7	92	11
OTU553	Primary:Bacteria;Phylum:Bacillota;Class:Erysipelotrichia;Order:Erysipelotrichales;Family:Erysipelotrichaceae;Genus:NA;Species:NA;	0	0	0	7	0	0	0	0	0	0	1	0	0	0	1	1	0	0	0	0	0	0	2	0	0	0	1	0	1	0	0	2	0	0	5	0	3	0	0	0
OTU554	Primary:Bacteria;Phylum:Bacillota;Class:Clostridia;Order:Eubacteriales;Family:Oscillospiraceae;Genus:NA;Species:NA;	1	3	0	1	3	3	0	0	0	0	1	2	1	0	0	0	0	1	0	0	0	2	0	1	2	2	1	0	48	0	0	1	1	0	0	0	0	0	0	0
OTU555	Primary:Bacteria;Phylum:Bacillota;Class:Erysipelotrichia;Order:Erysipelotrichales;Family:NA;Genus:NA;Species:NA;	0	0	0	1	1	0	0	0	0	0	0	6	0	0	0	1	1	0	0	0	1	4	0	4	1	1	0	0	0	1	0	0	0	0	0	0	5	5	0	0
OTU556	Primary:Bacteria;Phylum:Pseudomonadota;Class:Deltaproteobacteria;Order:Desulfovibrionales;Family:Desulfovibrionaceae;Genus:NA;Species:NA;	3	8	1	0	3	0	1	3	4	0	1	2	5	4	6	1	0	0	3	0	0	0	2	0	0	1	0	0	1	2	4	0	0	0	0	0	1	0	0	1
OTU557	Primary:Bacteria;Phylum:Bacillota;Class:Clostridia;Order:Eubacteriales;Family:Oscillospiraceae;Genus:NA;Species:NA;	214	19	110	313	98	64	334	67	91	363	426	234	140	26	399	66	84	47	279	80	260	88	114	73	248	93	307	11	42	64	46	60	84	228	37	65	43	100	20	57
OTU558	Primary:Bacteria;Phylum:Bacillota;Class:Clostridia;Order:Eubacteriales;Family:Christensenellaceae;Genus:Guopingia;Species:Guopingia_tenuis;	0	0	0	1	0	0	0	2	0	0	0	8	1	3	0	0	2	0	0	1	1	5	0	0	0	1	0	0	0	0	2	0	0	1	0	4	2	0	0	0
OTU56	Primary:Bacteria;Phylum:Bacillota;Class:Erysipelotrichia;Order:Erysipelotrichales;Family:Erysipelotrichaceae;Genus:Traorella;Species:Traorella_massiliensis;	3	8	15	347	52	0	10	64	3	60	14	0	13	3	1	28	70	20	0	2	5	7	40	84	146	17	6	11	0	16	49	15	92	84	0	92	37	81	42	28
OTU561	Primary:Bacteria;Phylum:Bacteroidota;Class:Bacteroidia;Order:Bacteroidales;Family:Porphyromonadaceae;Genus:Parabacteroides;Species:Parabacteroides_johnsonii;	8	4	0	0	5	3	0	1	0	0	0	0	2	0	5	0	0	0	0	9	0	0	0	1	0	0	0	3	0	0	0	0	0	0	0	0	1	1	2	0
OTU562	Primary:Bacteria;Phylum:Pseudomonadota;Class:Deltaproteobacteria;Order:Desulfovibrionales;Family:Desulfovibrionaceae;Genus:Desulfovibrio;Species:NA;	4	7	0	0	2	0	0	4	2	1	0	3	0	1	3	1	2	2	4	9	0	0	12	0	0	0	0	2	1	1	0	2	1	0	1	0	0	0	1	1
OTU564	Primary:Bacteria;Phylum:Bacillota;Class:Erysipelotrichia;Order:Erysipelotrichales;Family:NA;Genus:NA;Species:NA;	6	1	0	0	2	1	1	3	5	0	0	0	0	0	2	0	0	0	0	4	0	0	1	0	0	2	1	0	0	0	1	0	0	0	3	0	0	0	3	0
OTU565	Primary:Bacteria;Phylum:Bacillota;Class:Clostridia;Order:Eubacteriales;Family:Oscillospiraceae;Genus:NA;Species:NA;	4	2	0	1	1	0	2	0	5	0	0	0	0	0	3	0	1	1	3	0	1	1	2	2	0	1	0	0	0	4	4	6	1	2	2	7	6	3	0	2
OTU566	Primary:Bacteria;Phylum:Bacillota;Class:Clostridia;Order:Eubacteriales;Family:Oscillospiraceae;Genus:NA;Species:NA;	31	70	69	2	46	7	5	65	36	10	1	6	34	9	61	1	1	3	39	183	0	0	26	0	1	7	2	29	6	1	0	1	5	0	66	2	5	5	75	15
OTU569	Primary:Bacteria;Phylum:Bacillota;Class:Clostridia;Order:Eubacteriales;Family:Oscillospiraceae;Genus:NA;Species:NA;	0	1	0	0	0	1	0	1	1	0	1	3	3	0	2	2	0	3	3	1	0	0	3	1	2	1	3	0	0	2	0	2	2	0	0	2	1	1	0	0
OTU57	Primary:Bacteria;Phylum:Bacillota;Class:Clostridia;Order:Eubacteriales;Family:Oscillospiraceae;Genus:Neglecta;Species:Neglecta_timonensis;	95	97	261	26	160	57	132	191	79	39	46	33	289	106	185	134	13	158	62	30	4	11	31	17	3	69	81	45	46	5	41	46	36	12	38	107	117	83	22	686
OTU571	Primary:Bacteria;Phylum:Bacillota;Class:Clostridia;Order:Eubacteriales;Family:Oscillospiraceae;Genus:NA;Species:NA;	2	1	1	1	2	0	1	1	4	0	2	1	2	2	0	0	0	0	3	1	0	0	2	0	0	2	0	0	0	0	0	0	0	0	3	0	1	0	0	1
OTU572	Primary:Bacteria;Phylum:Bacteroidota;Class:Bacteroidia;Order:Bacteroidales;Family:Muribaculaceae;Genus:Duncaniella;Species:NA;	2	8	1	6	21	3	5	4	2	4	0	3	12	1	1	3	2	0	2	6	0	0	0	0	2	0	0	0	0	0	0	0	0	0	0	1	0	0	1	0
OTU574	Primary:Bacteria;Phylum:Pseudomonadota;Class:Deltaproteobacteria;Order:Desulfovibrionales;Family:Desulfovibrionaceae;Genus:Desulfovibrio;Species:NA;	0	3	0	0	0	0	1	2	2	0	0	0	0	3	2	0	1	0	9	1	0	0	2	0	0	0	0	0	1	0	0	1	0	1	0	0	2	2	0	5
OTU575	Primary:Bacteria;Phylum:Bacillota;Class:Clostridia;Order:Eubacteriales;Family:Lachnospiraceae;Genus:NA;Species:NA;	8	2	6	5	6	3	0	3	0	0	4	5	6	2	5	2	0	0	1	7	0	0	0	0	0	0	0	0	0	2	0	0	0	0	0	2	0	0	2	1
OTU576	Primary:Bacteria;Phylum:Bacillota;Class:Clostridia;Order:Eubacteriales;Family:Oscillospiraceae;Genus:Ruminococcus;Species:Ruminococcus_callidus;	0	1	1	0	2	0	1	2	1	1	3	0	0	0	0	0	1	2	0	0	0	0	2	0	0	0	0	1	0	0	1	2	2	0	0	2	0	0	0	2
OTU577	Primary:Bacteria;Phylum:Bacillota;Class:Clostridia;Order:Eubacteriales;Family:Oscillospiraceae;Genus:NA;Species:NA;	2	2	4	0	9	3	1	24	8	3	1	2	3	3	12	2	0	12	7	23	0	0	4	0	0	0	0	5	0	1	0	2	0	0	7	1	1	0	1	7
OTU578	Primary:Bacteria;Phylum:Bacteroidota;Class:Bacteroidia;Order:Bacteroidales;Family:NA;Genus:NA;Species:NA;	5	8	0	0	28	0	2	7	1	6	0	0	1	0	0	0	0	0	0	1	0	5	0	1	0	0	0	2	0	0	0	0	0	0	4	0	0	0	0	0
OTU579	Primary:Bacteria;Phylum:Bacillota;Class:NA;Order:NA;Family:NA;Genus:NA;Species:NA;	1	5	14	23	4	11	1	1	13	8	10	3	8	4	1	2	1	7	0	2	1	9	8	7	19	2	6	0	1	3	8	5	7	5	6	3	3	6	1	0
OTU58	Primary:Bacteria;Phylum:Bacillota;Class:Clostridia;Order:Eubacteriales;Family:NA;Genus:NA;Species:NA;	145	164	30	119	267	59	50	65	52	120	17	49	227	358	4	138	35	60	2	0	314	158	13	44	14	72	230	6	194	164	8	735	185	141	49	23	7	221	9	52
OTU580	Primary:Bacteria;Phylum:Bacillota;Class:NA;Order:NA;Family:NA;Genus:NA;Species:NA;	0	0	1	16	1	8	0	3	0	0	0	4	0	2	0	0	0	0	0	0	0	0	3	0	0	0	0	0	0	0	0	0	3	1	1	0	1	0	2	2
OTU581	Primary:Bacteria;Phylum:Bacteroidota;Class:Bacteroidia;Order:Bacteroidales;Family:Prevotellaceae;Genus:Leyella;Species:Leyella_stercorea;	1	4	2	3	10	4	4	3	0	1	2	4	8	0	2	0	1	3	1	3	1	0	0	0	0	1	0	1	0	1	2	0	0	0	0	0	0	0	0	0
OTU582	Primary:Bacteria;Phylum:Bacillota;Class:NA;Order:NA;Family:NA;Genus:NA;Species:NA;	3	11	0	0	0	1	2	3	1	0	0	3	1	0	0	0	0	0	0	6	0	1	11	2	0	0	2	7	6	0	2	1	0	0	4	0	1	1	6	0
OTU584	Primary:Bacteria;Phylum:Bacillota;Class:Clostridia;Order:Eubacteriales;Family:Oscillospiraceae;Genus:NA;Species:NA;	1	1	1	2	1	5	5	0	3	3	5	7	1	4	2	2	1	3	0	0	0	2	3	1	1	8	1	0	8	1	1	3	0	3	0	7	0	0	0	4
OTU585	Primary:Bacteria;Phylum:Bacillota;Class:Clostridia;Order:Eubacteriales;Family:Oscillospiraceae;Genus:NA;Species:NA;	2	2	4	0	14	0	0	4	8	2	1	0	1	0	0	0	0	0	0	2	0	0	2	0	0	0	0	1	0	0	0	0	0	0	5	0	1	0	5	1
OTU586	Primary:Bacteria;Phylum:Bacillota;Class:Clostridia;Order:Eubacteriales;Family:Lachnospiraceae;Genus:NA;Species:NA;	2	6	8	0	7	0	2	10	4	2	8	3	4	1	8	10	0	7	11	12	0	0	3	1	1	3	3	6	0	2	3	3	1	0	10	4	1	2	5	5
OTU587	Primary:Bacteria;Phylum:Bacillota;Class:Clostridia;Order:Eubacteriales;Family:Oscillospiraceae;Genus:NA;Species:NA;	5	5	5	1	4	7	12	15	0	5	6	1	10	7	1	10	2	5	2	5	4	1	6	5	1	0	0	1	2	3	18	7	9	0	1	25	7	15	16	8
OTU588	Primary:Bacteria;Phylum:Bacillota;Class:Clostridia;Order:Eubacteriales;Family:Lachnospiraceae;Genus:NA;Species:NA;	15	33	12	13	12	9	13	9	0	11	9	12	4	5	8	6	1	6	8	15	2	0	0	0	4	0	0	0	2	1	0	0	0	0	0	4	0	1	3	2
OTU589	Primary:Bacteria;Phylum:Bacillota;Class:Clostridia;Order:Eubacteriales;Family:Lachnospiraceae;Genus:NA;Species:NA;	154	532	122	33	234	54	112	416	61	196	202	183	162	233	336	419	164	234	60	124	77	97	396	180	24	174	79	333	237	76	80	80	161	37	78	82	300	317	17	50
OTU59	Primary:Bacteria;Phylum:Bacillota;Class:Clostridia;Order:Eubacteriales;Family:Oscillospiraceae;Genus:NA;Species:NA;	26	31	146	42	51	55	63	26	150	34	71	63	46	114	22	317	16	141	88	69	19	105	50	8	2	25	13	16	82	20	57	149	78	237	70	81	153	108	14	336
OTU590	Primary:Bacteria;Phylum:Bacillota;Class:Clostridia;Order:Eubacteriales;Family:NA;Genus:NA;Species:NA;	0	0	0	4	1	4	0	4	0	1	3	0	0	1	0	1	0	1	0	0	0	0	0	1	0	1	0	1	1	3	4	4	1	1	0	4	4	3	0	0
OTU591	Primary:Bacteria;Phylum:Bacillota;Class:Clostridia;Order:Eubacteriales;Family:Oscillospiraceae;Genus:NA;Species:NA;	2	1	1	0	0	1	1	2	0	0	4	0	0	6	1	1	1	0	1	0	1	2	0	0	0	0	0	0	0	0	0	1	0	0	0	0	2	0	0	1
OTU592	Primary:Bacteria;Phylum:Bacillota;Class:Clostridia;Order:Eubacteriales;Family:Christensenellaceae;Genus:NA;Species:NA;	1	2	2	0	3	0	1	2	4	0	4	1	7	3	5	2	0	3	1	4	1	0	2	0	0	1	0	1	2	1	0	0	1	2	3	1	0	0	0	2
OTU593	Primary:Bacteria;Phylum:Bacillota;Class:Clostridia;Order:Eubacteriales;Family:Oscillospiraceae;Genus:NA;Species:NA;	2	1	1	1	0	0	0	0	1	3	1	1	1	0	1	1	1	0	4	1	1	0	1	0	5	0	0	1	0	2	1	1	0	14	1	5	0	4	0	1
OTU594	Primary:Bacteria;Phylum:Bacillota;Class:Clostridia;Order:Eubacteriales;Family:Christensenellaceae;Genus:Guopingia;Species:Guopingia_tenuis;	3	5	3	4	6	2	1	4	1	0	1	1	1	3	2	1	2	13	0	3	1	1	0	0	0	1	0	0	0	0	0	0	0	0	3	0	0	0	0	1
OTU595	Primary:Bacteria;Phylum:Bacillota;Class:Clostridia;Order:Eubacteriales;Family:Christensenellaceae;Genus:Christensenella;Species:NA;	2	0	1	1	0	1	2	1	1	0	4	3	2	0	0	3	1	0	0	0	0	0	0	2	0	0	2	0	1	1	0	1	0	4	0	0	0	1	0	0
OTU596	Primary:Bacteria;Phylum:Bacillota;Class:NA;Order:NA;Family:NA;Genus:NA;Species:NA;	5	1	0	0	3	3	0	0	1	1	0	0	0	0	3	0	0	1	0	7	0	0	0	5	0	0	1	5	0	0	0	0	0	2	11	0	0	0	1	0
OTU597	Primary:Bacteria;Phylum:Bacteroidota;Class:Bacteroidia;Order:Bacteroidales;Family:NA;Genus:NA;Species:NA;	0	1	0	0	5	1	1	1	0	1	0	1	2	0	2	2	0	5	0	0	2	0	0	0	0	0	0	0	0	0	0	0	0	0	0	0	0	0	0	1
OTU598	Primary:Bacteria;Phylum:Bacillota;Class:Clostridia;Order:Eubacteriales;Family:Lachnospiraceae;Genus:NA;Species:NA;	2	1	1	0	1	3	1	4	2	1	6	0	0	1	3	0	0	0	2	0	1	1	0	1	1	2	0	0	0	4	2	2	3	1	1	1	1	1	1	0
OTU599	Primary:Bacteria;Phylum:Bacteroidota;Class:Bacteroidia;Order:Bacteroidales;Family:Prevotellaceae;Genus:Segatella;Species:Segatella_copri;	29	38	16	16	0	11	17	13	4	21	16	14	6	4	6	0	10	21	11	10	5	0	0	0	0	0	0	0	0	6	0	0	0	0	0	3	1	0	1	0
OTU6	Primary:Bacteria;Phylum:Bacillota;Class:Clostridia;Order:Eubacteriales;Family:Oscillospiraceae;Genus:NA;Species:NA;	54	576	715	983	335	20	192	741	96	623	251	391	593	11	23	1259	246	259	228	11	18	144	289	182	101	378	189	275	6	101	235	711	560	237	905	622	1697	186	976	232
OTU60	Primary:Bacteria;Phylum:Bacillota;Class:NA;Order:NA;Family:NA;Genus:NA;Species:NA;	11	100	7	43	41	39	48	110	149	32	77	44	195	15	131	428	57	11	33	23	120	94	31	106	115	223	81	14	428	4	169	154	99	57	8	235	116	392	6	53
OTU600	Primary:Bacteria;Phylum:Pseudomonadota;Class:NA;Order:NA;Family:NA;Genus:NA;Species:NA;	11	16	0	1	0	1	4	1	20	0	0	0	0	0	1	0	0	0	0	3	0	0	11	0	0	0	1	5	0	2	0	0	0	0	10	0	0	0	0	0
OTU602	Primary:Bacteria;Phylum:Bacillota;Class:Clostridia;Order:Eubacteriales;Family:Oscillospiraceae;Genus:Hydrogeniiclostridium;Species:Hydrogeniiclostridium_hominis;	1	0	1	1	1	0	2	1	4	0	6	0	3	0	0	1	0	0	0	0	1	1	0	1	0	0	0	0	0	3	0	0	0	0	0	3	1	3	0	2
OTU603	Primary:Bacteria;Phylum:Bacillota;Class:Bacilli;Order:Caryophanales;Family:Bacillaceae;Genus:Caldibacillus;Species:Caldibacillus_thermoamylovorans;	0	2	3	0	0	0	0	0	0	0	1	17	12	1	0	3	0	5	0	7	0	2	4	4	1	4	0	0	0	13	1	0	0	0	0	11	8	4	3	3
OTU604	Primary:Bacteria;Phylum:Bacillota;Class:Clostridia;Order:Eubacteriales;Family:Oscillospiraceae;Genus:Lawsonibacter;Species:Lawsonibacter_asaccharolyticus;	0	2	6	0	3	0	0	3	1	1	0	0	1	1	0	5	0	1	0	0	0	1	0	0	0	0	0	0	0	3	1	3	3	0	2	1	6	3	2	2
OTU605	Primary:Bacteria;Phylum:NA;Class:NA;Order:NA;Family:NA;Genus:NA;Species:NA;	0	0	0	1	0	0	0	0	1	0	0	0	0	0	0	0	1	0	3	3	0	1	3	0	0	0	0	6	0	0	0	0	2	0	0	0	0	0	0	0
OTU606	Primary:Bacteria;Phylum:Bacillota;Class:Clostridia;Order:Eubacteriales;Family:Oscillospiraceae;Genus:NA;Species:NA;	2	1	1	1	0	3	2	0	3	0	1	1	0	1	1	1	2	2	2	1	2	2	3	0	0	2	0	0	0	3	1	2	0	1	0	4	1	0	0	2
OTU607	Primary:Bacteria;Phylum:Bacillota;Class:Clostridia;Order:Eubacteriales;Family:Peptococcaceae;Genus:Peptococcus;Species:NA;	4	5	4	2	11	4	2	13	1	2	1	0	2	0	0	0	1	3	0	0	1	3	7	3	3	3	1	12	2	3	3	4	3	2	7	3	1	0	4	2
OTU608	Primary:Bacteria;Phylum:Bacillota;Class:Clostridia;Order:Eubacteriales;Family:Oscillospiraceae;Genus:NA;Species:NA;	2	2	1	0	1	0	0	1	2	0	0	1	0	0	1	1	1	1	0	0	0	0	2	0	0	1	1	0	0	0	0	1	0	2	2	7	3	0	2	0
OTU609	Primary:Bacteria;Phylum:Verrucomicrobiota;Class:Opitutia;Order:Puniceicoccales;Family:Puniceicoccaceae;Genus:Ruficoccus;Species:Ruficoccus_amylovorans;	0	0	0	0	0	1	1	9	1	0	0	0	0	0	1	1	0	0	1	0	0	0	5	0	0	3	0	0	0	0	0	0	0	1	0	0	0	0	0	1
OTU61	Primary:Bacteria;Phylum:Bacillota;Class:Clostridia;Order:Eubacteriales;Family:Lachnospiraceae;Genus:Blautia;Species:Blautia_glucerasea;	202	92	227	71	50	26	627	71	205	296	235	83	167	89	69	16	188	98	48	112	89	42	134	75	23	81	55	94	156	75	168	46	74	44	15	39	48	87	16	43
OTU611	Primary:Bacteria;Phylum:Bacillota;Class:NA;Order:NA;Family:NA;Genus:NA;Species:NA;	6	1	0	0	4	3	0	3	3	3	0	0	1	1	2	0	0	1	0	4	0	0	3	1	0	0	0	0	0	1	0	0	0	0	7	0	1	0	0	0
OTU612	Primary:Bacteria;Phylum:Bacillota;Class:Clostridia;Order:Eubacteriales;Family:Oscillospiraceae;Genus:NA;Species:NA;	14	14	71	5	17	6	13	44	30	9	25	60	58	154	58	30	6	152	63	13	6	17	18	1	0	6	32	12	20	22	80	47	52	7	13	17	69	82	7	247
OTU613	Primary:Bacteria;Phylum:Bacillota;Class:Clostridia;Order:Eubacteriales;Family:NA;Genus:NA;Species:NA;	21	12	116	13	22	5	18	60	60	4	104	106	61	30	8	6	102	199	205	3	1	52	119	21	26	12	20	6	202	21	30	34	23	13	13	14	45	27	14	35
OTU614	Primary:Bacteria;Phylum:Bacillota;Class:Clostridia;Order:Eubacteriales;Family:Oscillospiraceae;Genus:NA;Species:NA;	3	2	0	2	2	0	0	0	0	0	0	0	0	0	1	0	0	0	0	3	1	0	6	0	0	0	0	0	0	0	1	1	0	1	0	0	0	0	0	1
OTU615	Primary:Bacteria;Phylum:Bacillota;Class:Clostridia;Order:Eubacteriales;Family:NA;Genus:NA;Species:NA;	6	1	8	18	4	10	3	4	6	0	5	5	2	1	2	2	1	10	7	0	2	3	5	5	16	5	8	0	11	6	2	3	19	1	5	4	38	7	0	2
OTU616	Primary:Bacteria;Phylum:Bacteroidota;Class:Bacteroidia;Order:Bacteroidales;Family:Prevotellaceae;Genus:Prevotellamassilia;Species:Prevotellamassilia_timonensis;	1	1	0	7	2	1	3	0	1	1	0	0	1	0	0	0	0	0	0	6	0	0	0	0	0	0	0	0	0	1	0	0	0	0	0	0	1	0	0	0
OTU618	Primary:Bacteria;Phylum:Bacillota;Class:Clostridia;Order:Eubacteriales;Family:Christensenellaceae;Genus:NA;Species:NA;	6	1	6	1	0	1	0	1	3	1	1	2	3	1	0	2	2	1	9	3	0	2	1	0	1	0	0	0	7	0	5	4	1	0	1	0	1	0	0	1
OTU619	Primary:Bacteria;Phylum:Bacillota;Class:Clostridia;Order:Eubacteriales;Family:Lachnospiraceae;Genus:NA;Species:NA;	0	1	1	0	1	0	0	0	1	0	0	1	0	1	0	0	0	0	1	0	0	1	2	1	0	0	1	0	0	1	0	0	2	0	2	2	36	0	1	2
OTU62	Primary:Bacteria;Phylum:Bacillota;Class:Clostridia;Order:Eubacteriales;Family:Oscillospiraceae;Genus:Anaeromassilibacillus;Species:Anaeromassilibacillus_senegalensis;	6	13	190	3	15	2	45	19	16	20	24	80	75	142	43	109	6	70	167	51	1	0	7	3	0	133	39	3	7	4	33	23	33	2	8	4	11	30	0	15
OTU620	Primary:Bacteria;Phylum:Bacillota;Class:Clostridia;Order:Eubacteriales;Family:Oscillospiraceae;Genus:NA;Species:NA;	1	0	1	0	1	0	2	3	1	1	2	3	5	1	0	7	0	2	1	2	0	0	1	0	0	0	0	0	2	0	0	1	1	0	0	1	0	0	0	2
OTU621	Primary:Bacteria;Phylum:Bacillota;Class:Clostridia;Order:Eubacteriales;Family:Oscillospiraceae;Genus:NA;Species:NA;	1	0	2	5	2	1	0	0	2	2	1	5	1	2	0	3	0	2	2	2	5	2	0	0	3	2	1	1	0	0	4	1	4	1	2	3	0	0	0	3
OTU622	Primary:Bacteria;Phylum:Bacillota;Class:Clostridia;Order:Eubacteriales;Family:Oscillospiraceae;Genus:Dysosmobacter;Species:Dysosmobacter_hominis;	9	5	3	0	18	1	2	10	8	6	1	3	3	3	21	1	1	6	0	7	0	0	5	0	0	1	0	2	0	2	1	0	2	1	5	1	3	3	0	8
OTU623	Primary:Bacteria;Phylum:Bacillota;Class:Clostridia;Order:Eubacteriales;Family:NA;Genus:NA;Species:NA;	4	4	2	0	7	1	1	5	3	3	0	0	1	0	7	0	0	0	0	9	0	0	1	0	0	1	0	0	0	0	1	0	1	0	11	0	0	0	2	0
OTU624	Primary:Bacteria;Phylum:Bacillota;Class:Clostridia;Order:Eubacteriales;Family:Oscillospiraceae;Genus:NA;Species:NA;	1	3	6	0	0	1	0	0	1	1	4	0	1	3	7	1	0	1	4	0	0	0	0	0	0	0	0	2	0	0	0	0	0	0	1	0	4	0	1	0
OTU626	Primary:Bacteria;Phylum:Bacillota;Class:Clostridia;Order:Eubacteriales;Family:NA;Genus:NA;Species:NA;	2	0	0	0	1	5	3	2	0	2	1	0	2	0	0	0	8	0	1	1	0	0	1	0	0	0	0	0	1	0	0	0	0	0	1	1	0	0	0	0
OTU627	Primary:Bacteria;Phylum:Bacteroidota;Class:Flavobacteriia;Order:Flavobacteriales;Family:Weeksellaceae;Genus:Apibacter;Species:NA;	0	1	0	0	0	14	0	0	0	0	0	2	0	8	0	0	0	3	0	0	0	0	0	0	0	1	0	1	0	1	0	0	0	0	6	0	0	0	0	0
OTU628	Primary:Bacteria;Phylum:Bacillota;Class:Clostridia;Order:Eubacteriales;Family:Oscillospiraceae;Genus:NA;Species:NA;	1	0	2	0	1	3	2	2	5	0	0	0	2	1	0	0	0	0	0	0	0	3	1	0	0	0	0	2	0	0	8	1	0	2	0	1	1	0	0	1
OTU629	Primary:Bacteria;Phylum:Bacillota;Class:Clostridia;Order:Eubacteriales;Family:Oscillospiraceae;Genus:NA;Species:NA;	0	0	0	0	0	0	0	0	0	1	3	0	0	0	1	2	0	0	0	0	0	0	0	0	0	2	7	0	2	1	3	0	0	0	5	0	2	2	0	0
OTU63	Primary:Bacteria;Phylum:Campylobacterota;Class:Campylobacteria;Order:Campylobacterales;Family:Campylobacteraceae;Genus:Campylobacter;Species:Campylobacter_avium;	116	274	0	11	94	5	30	423	18	16	0	18	11	1	95	0	0	6	5	83	0	14	390	9	10	31	4	137	0	1	11	1	0	5	435	2	9	0	56	0
OTU630	Primary:Bacteria;Phylum:Bacteroidota;Class:Bacteroidia;Order:Bacteroidales;Family:Rikenellaceae;Genus:Alistipes;Species:NA;	4	2	0	0	6	0	0	5	3	0	0	0	0	2	3	0	0	0	0	5	0	0	2	0	0	0	0	4	0	0	0	0	0	0	3	0	0	0	0	0
OTU631	Primary:Bacteria;Phylum:Bacillota;Class:Clostridia;Order:Eubacteriales;Family:NA;Genus:NA;Species:NA;	1	5	3	0	6	1	1	9	3	0	3	0	2	0	0	8	1	0	0	0	2	1	0	0	0	1	0	0	3	2	1	0	0	0	0	2	0	0	0	0
OTU632	Primary:Bacteria;Phylum:Bacillota;Class:Clostridia;Order:Eubacteriales;Family:Oscillospiraceae;Genus:NA;Species:NA;	1	0	0	3	1	1	0	1	0	1	3	0	0	0	1	0	2	1	0	0	0	0	2	3	0	0	0	0	0	1	1	0	0	0	0	3	0	1	0	0
OTU633	Primary:Bacteria;Phylum:Bacillota;Class:Clostridia;Order:Eubacteriales;Family:Syntrophomonadaceae;Genus:Syntrophomonas;Species:Syntrophomonas_zehnderi;	1	2	2	0	4	0	1	4	5	1	0	0	0	0	1	0	0	0	0	2	0	0	2	0	0	0	0	0	0	0	1	0	0	1	11	0	1	0	2	1
OTU634	Primary:Bacteria;Phylum:Bacillota;Class:Clostridia;Order:Eubacteriales;Family:Oscillospiraceae;Genus:Ruminococcus;Species:Ruminococcus_flavefaciens;	1	5	1	3	6	2	0	2	0	9	0	4	0	0	1	2	3	4	0	2	0	0	0	0	0	0	0	0	1	0	0	0	0	0	0	0	0	0	0	1
OTU638	Primary:Bacteria;Phylum:Bacillota;Class:Clostridia;Order:Eubacteriales;Family:Oscillospiraceae;Genus:NA;Species:NA;	0	7	4	0	1	0	0	2	1	0	2	0	0	0	0	4	1	0	3	2	1	0	0	0	0	0	0	0	0	2	0	0	0	0	1	1	2	0	0	3
OTU639	Primary:Bacteria;Phylum:Bacillota;Class:Clostridia;Order:Eubacteriales;Family:NA;Genus:NA;Species:NA;	1	2	1	0	1	0	1	0	1	1	0	1	1	0	1	0	5	1	1	0	0	1	0	0	0	1	0	0	0	0	1	2	0	1	0	0	0	1	0	0
OTU64	Primary:Bacteria;Phylum:Bacillota;Class:Clostridia;Order:Eubacteriales;Family:Lachnospiraceae;Genus:NA;Species:NA;	65	57	236	1349	16	272	115	65	44	147	364	6	24	2	0	53	58	286	1	3	106	82	258	98	37	12	23	4	19	381	381	141	218	115	120	103	76	138	15	0
OTU640	Primary:Bacteria;Phylum:Bacillota;Class:Bacilli;Order:Lactobacillales;Family:Lactobacillaceae;Genus:Ligilactobacillus;Species:Ligilactobacillus_saerimneri;	0	0	0	0	0	0	0	0	0	1	1	0	0	1	1	0	0	2	2	1	0	1	2	0	0	0	0	0	0	1	1	0	1	0	0	0	0	3	2	0
OTU641	Primary:Bacteria;Phylum:Bacillota;Class:Clostridia;Order:Eubacteriales;Family:NA;Genus:NA;Species:NA;	0	20	0	2	1	1	0	0	0	0	0	0	1	0	2	2	0	1	0	1	0	0	20	0	0	0	0	0	1	0	0	0	0	0	3	0	1	0	0	0
OTU642	Primary:Bacteria;Phylum:Pseudomonadota;Class:NA;Order:NA;Family:NA;Genus:NA;Species:NA;	1	7	0	1	11	0	0	2	0	2	0	11	1	1	11	0	0	0	0	4	0	2	2	8	0	0	0	1	0	1	0	0	1	2	5	0	0	0	0	2
OTU643	Primary:Bacteria;Phylum:Bacillota;Class:Clostridia;Order:Eubacteriales;Family:Eubacteriaceae;Genus:Anaerofustis;Species:Anaerofustis_stercorihominis;	1	0	0	1	0	0	1	0	0	1	1	0	0	5	2	1	1	1	0	0	1	0	0	3	1	1	0	0	0	0	1	2	0	3	0	1	0	1	0	0
OTU645	Primary:Bacteria;Phylum:Bacillota;Class:NA;Order:NA;Family:NA;Genus:NA;Species:NA;	0	1	3	3	2	0	4	2	15	1	1	0	1	0	2	0	0	0	0	0	0	2	3	0	0	0	0	0	33	0	5	0	0	0	0	0	0	1	0	0
OTU646	Primary:Bacteria;Phylum:Pseudomonadota;Class:Betaproteobacteria;Order:Nitrosomonadales;Family:Nitrosomonadaceae;Genus:Nitrosomonas;Species:NA;	5	7	0	0	2	0	0	5	0	0	0	0	1	0	8	0	0	0	0	4	0	0	8	0	0	1	0	2	1	0	0	0	0	0	2	0	0	0	0	0
OTU647	Primary:Bacteria;Phylum:Bacillota;Class:Clostridia;Order:Eubacteriales;Family:Oscillospiraceae;Genus:NA;Species:NA;	4	11	7	3	0	1	1	0	1	13	9	1	0	4	0	0	5	14	2	0	0	0	0	0	0	0	1	0	0	0	0	0	0	1	0	0	1	0	1	0
OTU648	Primary:Bacteria;Phylum:Bacillota;Class:Erysipelotrichia;Order:Erysipelotrichales;Family:Erysipelotrichaceae;Genus:NA;Species:NA;	0	0	4	0	0	0	0	0	0	0	0	0	0	0	0	0	0	0	61	0	0	0	0	1	0	0	0	0	0	0	0	0	0	2	0	0	0	0	0	0
OTU649	Primary:Bacteria;Phylum:Bacillota;Class:Clostridia;Order:Eubacteriales;Family:Oscillospiraceae;Genus:Oscillibacter;Species:Oscillibacter_valericigenes;	3	4	6	6	3	4	3	4	10	2	3	6	0	1	4	1	4	0	1	4	0	1	0	0	0	0	0	0	0	0	0	0	0	0	0	1	0	0	1	1
OTU65	Primary:Bacteria;Phylum:Bacillota;Class:Clostridia;Order:Eubacteriales;Family:Oscillospiraceae;Genus:NA;Species:NA;	22	9	28	6	12	4	13	35	56	18	34	51	60	49	7	221	3	34	44	18	1	6	11	7	2	50	85	3	13	41	53	137	205	16	69	220	110	279	34	122
OTU650	Primary:Bacteria;Phylum:Bacillota;Class:Clostridia;Order:Eubacteriales;Family:Christensenellaceae;Genus:Guopingia;Species:Guopingia_tenuis;	4	1	0	0	3	0	0	1	7	2	3	3	2	1	2	3	5	1	3	0	1	1	1	3	3	5	1	0	1	1	0	3	3	2	0	2	3	1	0	12
OTU651	Primary:Bacteria;Phylum:Bacillota;Class:Clostridia;Order:Eubacteriales;Family:NA;Genus:NA;Species:NA;	3	0	0	1	25	0	1	5	2	0	0	0	0	0	6	0	1	0	0	1	0	0	2	0	0	0	0	3	0	0	0	0	0	0	4	0	1	0	1	0
OTU652	Primary:Bacteria;Phylum:Bacillota;Class:Clostridia;Order:Eubacteriales;Family:Oscillospiraceae;Genus:NA;Species:NA;	2	0	0	0	3	0	0	0	0	0	0	0	0	0	5	0	0	0	7	3	7	1	4	0	0	0	0	0	0	0	0	0	0	0	0	0	0	0	1	0
OTU653	Primary:Bacteria;Phylum:Bacillota;Class:Bacilli;Order:Caryophanales;Family:Thermoactinomycetaceae;Genus:Kroppenstedtia;Species:Kroppenstedtia_eburnea;	0	2	0	0	0	0	0	0	0	1	0	0	16	0	0	0	1	0	0	0	0	0	6	0	0	0	0	0	4	1	0	0	0	0	2	1	3	1	1	2
OTU655	Primary:Bacteria;Phylum:Fusobacteriota;Class:Fusobacteriia;Order:Fusobacteriales;Family:Fusobacteriaceae;Genus:Fusobacterium;Species:Fusobacterium_mortiferum;	5	0	0	0	0	0	0	0	2	1	1	0	0	0	0	0	5	1	0	0	0	0	0	0	0	0	0	15	0	8	1	0	0	0	1	0	0	0	6	0
OTU656	Primary:Bacteria;Phylum:Bacillota;Class:Clostridia;Order:Eubacteriales;Family:NA;Genus:NA;Species:NA;	1	2	2	0	0	0	0	4	0	0	3	0	1	0	0	2	0	0	0	0	0	0	0	0	0	0	2	0	1	0	1	4	0	0	0	2	3	4	0	5
OTU657	Primary:Bacteria;Phylum:Bacillota;Class:Clostridia;Order:Eubacteriales;Family:Lachnospiraceae;Genus:Anaerobutyricum;Species:Anaerobutyricum_hallii;	43	59	23	27	44	24	10	12	18	26	50	79	8	28	34	69	31	16	29	31	14	59	56	47	37	11	39	11	53	9	24	25	66	32	13	157	71	87	15	77
OTU659	Primary:Bacteria;Phylum:Actinomycetota;Class:Coriobacteriia;Order:NA;Family:NA;Genus:NA;Species:NA;	0	0	0	0	0	0	0	0	0	1	1	2	1	1	0	0	1	0	0	0	1	0	1	0	0	1	1	0	1	0	1	0	5	2	0	0	1	2	0	0
OTU66	Primary:Bacteria;Phylum:Bacillota;Class:Clostridia;Order:Eubacteriales;Family:NA;Genus:NA;Species:NA;	28	35	11	31	44	95	24	63	91	61	20	90	26	50	33	129	26	71	9	10	78	91	44	11	108	68	48	8	97	5	21	44	98	35	3	57	34	48	2	66
OTU660	Primary:Bacteria;Phylum:Bacillota;Class:Clostridia;Order:Eubacteriales;Family:Oscillospiraceae;Genus:Vescimonas;Species:Vescimonas_fastidiosa;	1	0	0	1	0	6	1	0	0	1	0	10	1	2	0	5	0	3	1	3	0	1	0	0	0	0	0	0	0	12	0	1	0	0	0	0	0	0	0	1
OTU661	Primary:Bacteria;Phylum:Bacillota;Class:Clostridia;Order:Eubacteriales;Family:Oscillospiraceae;Genus:Flintibacter;Species:Flintibacter_hominis;	4	5	6	0	16	2	4	8	3	3	2	1	5	2	2	1	1	1	1	10	0	0	4	0	0	0	0	9	1	0	1	1	0	1	18	1	3	0	7	1
OTU662	Primary:Bacteria;Phylum:Pseudomonadota;Class:Deltaproteobacteria;Order:Desulfovibrionales;Family:Desulfovibrionaceae;Genus:Bilophila;Species:Bilophila_wadsworthia;	3	5	0	1	5	0	1	10	3	0	0	1	0	1	0	0	0	0	0	2	0	0	3	0	0	1	0	1	0	1	0	0	1	0	2	0	0	0	0	0
OTU663	Primary:Bacteria;Phylum:Bacillota;Class:Clostridia;Order:Eubacteriales;Family:Lachnospiraceae;Genus:NA;Species:NA;	0	0	0	0	6	0	0	1	1	0	0	0	0	5	0	0	0	0	0	0	0	1	0	0	0	0	0	0	0	3	0	6	10	1	2	0	3	0	0	2
OTU664	Primary:Bacteria;Phylum:Bacillota;Class:Clostridia;Order:Eubacteriales;Family:Oscillospiraceae;Genus:Hydrogeniiclostridium;Species:NA;	0	0	0	0	0	0	0	8	2	0	0	0	1	0	4	2	0	1	0	0	0	0	2	0	0	0	0	3	0	0	0	0	0	0	0	1	0	0	2	0
OTU666	Primary:Bacteria;Phylum:Bacillota;Class:NA;Order:NA;Family:NA;Genus:NA;Species:NA;	1	1	0	0	3	0	0	4	1	0	1	0	0	0	2	0	0	0	0	1	0	0	0	0	0	0	0	2	1	0	0	1	0	0	2	0	0	0	0	0
OTU667	Primary:Bacteria;Phylum:Bacillota;Class:Clostridia;Order:Eubacteriales;Family:Lachnospiraceae;Genus:NA;Species:NA;	8	7	5	3	8	4	4	2	2	4	1	3	5	3	4	1	1	0	0	4	1	0	0	0	1	0	1	0	0	0	1	0	0	0	0	0	1	0	0	2
OTU668	Primary:Bacteria;Phylum:Pseudomonadota;Class:Deltaproteobacteria;Order:Desulfovibrionales;Family:Desulfovibrionaceae;Genus:Desulfovibrio;Species:NA;	5	3	0	1	3	0	0	3	0	0	0	0	0	1	0	0	0	0	0	0	0	1	1	0	0	1	0	0	0	0	0	3	0	0	3	0	2	0	1	1
OTU67	Primary:Bacteria;Phylum:Bacillota;Class:Clostridia;Order:Eubacteriales;Family:Oscillospiraceae;Genus:NA;Species:NA;	3	37	18	3	21	4	97	6	33	27	46	4	34	95	39	26	1	37	54	15	18	5	10	11	6	74	32	2	1	216	88	59	54	3	2	6	13	256	3	68
OTU670	Primary:Bacteria;Phylum:Bacillota;Class:Clostridia;Order:Eubacteriales;Family:Oscillospiraceae;Genus:NA;Species:NA;	1	1	0	0	3	0	0	0	0	0	1	0	0	1	0	1	0	0	0	0	0	0	1	0	1	0	1	0	0	1	1	4	0	0	0	5	1	1	0	3
OTU671	Primary:Bacteria;Phylum:Bacillota;Class:Clostridia;Order:Eubacteriales;Family:Lachnospiraceae;Genus:NA;Species:NA;	0	0	0	0	0	1	0	1	0	1	1	0	0	1	0	7	0	0	0	2	0	0	0	0	0	0	1	4	0	2	0	1	0	0	0	1	1	1	1	0
OTU672	Primary:Bacteria;Phylum:Bacillota;Class:Clostridia;Order:Eubacteriales;Family:Oscillospiraceae;Genus:NA;Species:NA;	0	1	1	2	1	1	2	2	0	2	7	2	2	2	0	1	2	2	0	1	0	0	0	1	0	0	0	0	0	1	0	0	3	0	1	0	3	0	0	0
OTU673	Primary:Bacteria;Phylum:Bacillota;Class:Clostridia;Order:Eubacteriales;Family:Lachnospiraceae;Genus:NA;Species:NA;	0	2	0	4	0	9	1	1	0	0	0	9	0	4	2	2	1	0	0	12	0	1	0	0	1	0	0	0	0	1	0	0	0	0	0	2	0	3	1	0
OTU674	Primary:Bacteria;Phylum:Bacillota;Class:Clostridia;Order:Eubacteriales;Family:NA;Genus:NA;Species:NA;	3	11	0	0	6	1	0	4	1	1	0	0	0	0	1	0	0	1	0	0	0	0	1	0	0	0	0	0	0	0	0	0	0	0	3	0	0	0	1	0
OTU675	Primary:Bacteria;Phylum:Bacteroidota;Class:Bacteroidia;Order:Bacteroidales;Family:Muribaculaceae;Genus:Paramuribaculum;Species:Paramuribaculum_intestinale;	0	1	0	2	2	1	1	2	0	1	0	2	2	1	0	0	2	0	0	0	0	0	0	0	1	0	0	0	0	1	0	0	0	0	0	0	1	1	1	0
OTU676	Primary:Bacteria;Phylum:Bacillota;Class:Clostridia;Order:Eubacteriales;Family:Oscillospiraceae;Genus:Harryflintia;Species:Harryflintia_acetispora;	4	0	0	0	3	0	0	0	1	0	0	3	0	0	3	0	0	0	0	4	0	0	3	0	0	0	0	1	0	0	1	0	1	0	1	0	0	0	0	1
OTU677	Primary:Bacteria;Phylum:Bacillota;Class:NA;Order:NA;Family:NA;Genus:NA;Species:NA;	0	7	0	0	0	0	0	1	0	1	1	0	0	0	0	0	0	0	0	0	0	0	14	2	0	0	0	0	0	0	0	0	0	0	1	0	0	0	0	0
OTU678	Primary:Bacteria;Phylum:Bacillota;Class:Clostridia;Order:Eubacteriales;Family:Oscillospiraceae;Genus:NA;Species:NA;	2	0	2	0	2	1	0	3	0	1	0	0	0	0	3	1	0	1	0	2	0	0	4	0	1	1	1	0	0	0	2	0	0	0	3	0	2	2	1	0
OTU679	Primary:Bacteria;Phylum:Bacillota;Class:Clostridia;Order:Eubacteriales;Family:Oscillospiraceae;Genus:NA;Species:NA;	2	0	1	3	0	0	2	0	2	2	0	0	1	0	2	2	0	0	0	0	0	0	0	0	0	1	2	1	0	2	0	0	0	0	0	0	0	0	0	2
OTU68	Primary:Bacteria;Phylum:Bacillota;Class:NA;Order:NA;Family:NA;Genus:NA;Species:NA;	84	105	270	189	120	165	133	85	162	217	214	329	508	269	103	104	116	157	239	6	117	363	324	204	439	363	235	52	290	139	151	210	127	552	70	227	78	168	36	249
OTU680	Primary:Bacteria;Phylum:Bacillota;Class:Bacilli;Order:Lactobacillales;Family:Streptococcaceae;Genus:Lactococcus;Species:Lactococcus_cremoris;	1	0	0	0	0	0	0	0	0	0	0	0	0	1	0	0	1	0	0	0	0	0	0	0	8	0	0	0	0	0	4	1	0	0	0	1	1	1	5	0
OTU681	Primary:Bacteria;Phylum:Bacillota;Class:Clostridia;Order:Eubacteriales;Family:Lachnospiraceae;Genus:Anaerotignum;Species:Anaerotignum_aminivorans;	0	1	2	0	1	0	0	2	0	0	0	0	0	0	0	0	0	2	2	2	0	0	0	0	0	0	0	1	0	0	1	1	0	0	0	0	3	1	1	1
OTU682	Primary:Bacteria;Phylum:Bacillota;Class:Bacilli;Order:Lactobacillales;Family:Lactobacillaceae;Genus:Ligilactobacillus;Species:NA;	1	0	0	0	0	0	6	1	3	1	0	0	0	0	3	0	22	1	0	0	0	0	0	1	0	0	0	0	0	0	0	0	0	0	0	0	0	0	0	1
OTU683	Primary:Bacteria;Phylum:Bacillota;Class:Clostridia;Order:Eubacteriales;Family:NA;Genus:NA;Species:NA;	2	3	0	0	0	0	0	2	1	0	4	0	1	0	1	1	0	0	0	1	0	0	4	0	0	0	0	1	0	2	0	0	0	0	5	0	0	0	0	0
OTU684	Primary:Bacteria;Phylum:Pseudomonadota;Class:Alphaproteobacteria;Order:Rhodospirillales;Family:NA;Genus:NA;Species:NA;	0	0	0	0	0	1	0	0	0	0	0	0	0	0	0	1	0	0	0	0	1	0	0	0	0	0	0	0	0	0	0	0	0	1	8	0	0	0	4	0
OTU686	Primary:Bacteria;Phylum:Bacillota;Class:Clostridia;Order:Eubacteriales;Family:NA;Genus:NA;Species:NA;	5	3	0	2	1	0	0	2	1	3	0	0	1	0	1	0	0	1	0	5	0	0	4	0	0	0	0	10	0	0	0	0	0	0	3	0	0	0	9	0
OTU688	Primary:Bacteria;Phylum:Bacillota;Class:Clostridia;Order:Eubacteriales;Family:Oscillospiraceae;Genus:NA;Species:NA;	1	0	2	0	0	0	0	0	0	0	0	0	0	0	0	1	1	0	1	0	2	0	1	1	0	0	0	0	0	0	0	9	2	0	3	0	0	0	0	1
OTU689	Primary:Bacteria;Phylum:Bacillota;Class:Clostridia;Order:Eubacteriales;Family:Lachnospiraceae;Genus:Catenibacillus;Species:Catenibacillus_scindens;	2	2	4	2	10	4	2	13	2	5	2	10	1	0	1	1	0	4	0	0	0	4	3	1	0	0	1	4	0	2	1	1	1	1	1	0	3	0	0	2
OTU69	Primary:Bacteria;Phylum:Bacillota;Class:Clostridia;Order:Eubacteriales;Family:NA;Genus:NA;Species:NA;	59	38	65	35	37	20	54	22	70	69	63	71	95	41	62	52	22	46	28	23	63	59	37	31	46	154	39	8	115	69	74	41	50	72	9	38	25	41	5	50
OTU690	Primary:Bacteria;Phylum:Bacillota;Class:Clostridia;Order:Eubacteriales;Family:Oscillospiraceae;Genus:NA;Species:NA;	0	2	0	0	2	0	0	0	1	0	2	1	2	0	1	2	0	0	1	2	1	1	2	0	0	0	1	0	1	2	0	0	0	0	1	2	0	0	0	0
OTU692	Primary:Bacteria;Phylum:Bacillota;Class:Clostridia;Order:Eubacteriales;Family:NA;Genus:NA;Species:NA;	7	3	10	59	7	24	6	2	12	1	9	8	5	6	2	10	11	12	0	1	3	44	17	25	15	9	22	3	36	9	11	33	47	41	3	8	16	15	2	17
OTU693	Primary:Bacteria;Phylum:Bacillota;Class:Clostridia;Order:Eubacteriales;Family:Oscillospiraceae;Genus:NA;Species:NA;	20	0	0	0	20	2	1	8	5	0	0	5	2	1	0	0	0	0	0	0	0	1	3	1	0	0	0	0	0	1	1	0	0	0	10	1	2	0	13	0
OTU694	Primary:Bacteria;Phylum:Bacillota;Class:NA;Order:NA;Family:NA;Genus:NA;Species:NA;	1	1	2	1	0	0	0	0	1	1	2	0	0	2	0	2	0	1	0	0	1	0	0	0	0	1	0	0	1	0	2	0	0	0	0	0	0	2	0	0
OTU696	Primary:Bacteria;Phylum:Bacillota;Class:Clostridia;Order:Eubacteriales;Family:Oscillospiraceae;Genus:NA;Species:NA;	3	7	0	0	4	0	0	4	0	2	0	1	1	0	3	0	0	0	0	0	1	0	3	0	0	0	0	3	1	0	0	0	0	1	7	1	0	0	3	0
OTU697	Primary:Bacteria;Phylum:Bacillota;Class:Clostridia;Order:Eubacteriales;Family:NA;Genus:NA;Species:NA;	2	2	0	0	6	0	1	1	1	0	0	1	1	0	2	0	0	0	0	0	1	0	1	1	0	1	0	1	0	0	0	0	0	0	4	0	0	0	5	0
OTU698	Primary:Bacteria;Phylum:Bacillota;Class:Clostridia;Order:Eubacteriales;Family:Oscillospiraceae;Genus:NA;Species:NA;	2	1	0	1	1	0	0	2	2	0	4	0	0	2	1	1	0	0	1	1	0	0	0	0	0	2	0	0	1	1	0	0	1	0	1	0	0	1	0	1
OTU699	Primary:Bacteria;Phylum:Bacillota;Class:Clostridia;Order:Eubacteriales;Family:Oscillospiraceae;Genus:Neglecta;Species:Neglecta_timonensis;	32	16	31	44	29	100	28	71	34	14	48	24	38	107	48	34	52	27	5	14	195	22	12	166	64	61	25	11	118	52	74	136	58	85	4	203	93	78	6	147
OTU7	Primary:Bacteria;Phylum:Bacillota;Class:Clostridia;Order:Eubacteriales;Family:NA;Genus:NA;Species:NA;	100	134	44	157	303	590	22	21	4	3713	57	8	9	2	8	0	635	1651	8	8	36	677	339	149	1242	5	29	12	6	4	533	132	136	313	141	134	902	112	25	18
OTU70	Primary:Bacteria;Phylum:Actinomycetota;Class:Coriobacteriia;Order:Eggerthellales;Family:Eggerthellaceae;Genus:NA;Species:NA;	52	21	79	41	100	55	80	58	62	116	137	45	284	136	73	163	103	59	128	59	10	12	29	35	15	204	66	6	107	14	217	60	289	161	30	21	47	126	4	82
OTU700	Primary:Bacteria;Phylum:Bacillota;Class:Clostridia;Order:Eubacteriales;Family:Oscillospiraceae;Genus:Sporobacter;Species:Sporobacter_termitidis;	2	0	4	0	4	0	3	2	4	0	1	0	1	2	2	5	0	2	0	0	0	2	2	0	0	0	1	1	0	0	3	2	2	0	1	1	0	3	0	6
OTU701	Primary:Bacteria;Phylum:Pseudomonadota;Class:Deltaproteobacteria;Order:Desulfovibrionales;Family:Desulfovibrionaceae;Genus:Desulfovibrio;Species:Desulfovibrio_porci;	2	1	0	3	1	2	0	2	0	0	0	1	0	0	0	0	2	0	3	0	0	0	0	0	0	0	0	0	0	1	0	0	0	0	0	1	0	0	0	0
OTU702	Primary:Bacteria;Phylum:Bacillota;Class:Clostridia;Order:Eubacteriales;Family:Oscillospiraceae;Genus:NA;Species:NA;	1	2	0	0	6	1	0	0	0	1	0	0	1	0	4	0	0	0	1	0	1	1	0	0	0	0	1	0	1	0	3	1	1	2	0	2	0	1	0	1
OTU703	Primary:Bacteria;Phylum:Bacillota;Class:Bacilli;Order:Caryophanales;Family:Bacillaceae;Genus:Lentibacillus;Species:Lentibacillus_massiliensis;	0	7	0	0	0	0	0	0	0	5	0	0	1	1	0	0	1	0	0	0	0	0	0	0	0	0	0	0	7	0	0	0	0	0	4	3	1	2	5	10
OTU704	Primary:Bacteria;Phylum:Bacillota;Class:Clostridia;Order:Eubacteriales;Family:NA;Genus:NA;Species:NA;	0	2	1	0	3	0	0	1	3	2	1	1	0	0	1	0	0	2	3	0	0	0	2	1	0	0	0	2	0	0	0	0	0	0	0	0	0	0	0	3
OTU705	Primary:Bacteria;Phylum:Bacillota;Class:Clostridia;Order:Eubacteriales;Family:Oscillospiraceae;Genus:Ructibacterium;Species:Ructibacterium_gallinarum;	0	0	0	0	0	0	0	0	1	1	0	1	5	0	0	0	0	2	0	0	0	0	2	0	1	0	0	0	0	1	0	0	0	0	0	1	0	0	0	0
OTU706	Primary:Bacteria;Phylum:Mycoplasmatota;Class:Mollicutes;Order:NA;Family:NA;Genus:NA;Species:NA;	0	2	0	0	2	0	0	0	0	0	0	2	0	0	0	0	0	0	0	0	0	0	0	1	0	0	0	0	0	0	0	0	0	0	8	0	0	0	0	0
OTU707	Primary:Bacteria;Phylum:Pseudomonadota;Class:Betaproteobacteria;Order:Burkholderiales;Family:Oxalobacteraceae;Genus:Oxalobacter;Species:Oxalobacter_formigenes;	0	3	0	0	4	1	1	5	0	0	1	0	2	1	3	0	0	2	0	3	0	1	2	0	0	0	0	3	0	3	1	0	1	1	8	0	0	0	2	1
OTU709	Primary:Bacteria;Phylum:Bacillota;Class:Clostridia;Order:Eubacteriales;Family:Oscillospiraceae;Genus:NA;Species:NA;	2	3	0	1	1	1	1	0	1	1	0	1	0	0	0	1	0	5	0	1	1	0	0	0	0	0	0	0	0	0	0	0	0	0	0	0	0	0	0	1
OTU71	Primary:Bacteria;Phylum:NA;Class:NA;Order:NA;Family:NA;Genus:NA;Species:NA;	37	63	6	0	26	19	32	109	73	196	75	51	21	4	64	211	24	16	4	5	220	16	8	120	34	27	50	6	10	2	27	72	34	13	2	4	10	18	2	3
OTU710	Primary:Bacteria;Phylum:Bacillota;Class:Clostridia;Order:Eubacteriales;Family:Christensenellaceae;Genus:Christensenella;Species:Christensenella_hongkongensis;	0	3	0	0	7	0	0	1	0	0	0	0	1	0	0	2	0	0	0	0	0	0	1	0	0	2	1	0	0	2	0	0	0	0	1	0	0	0	0	0
OTU712	Primary:Bacteria;Phylum:Bacteroidota;Class:Bacteroidia;Order:Bacteroidales;Family:Odoribacteraceae;Genus:Butyricimonas;Species:Butyricimonas_virosa;	1	4	0	0	3	0	0	0	0	0	0	0	4	1	0	0	0	0	0	3	0	0	0	0	0	0	0	2	0	0	0	0	0	0	5	0	0	0	0	0
OTU713	Primary:Bacteria;Phylum:Bacillota;Class:Clostridia;Order:Eubacteriales;Family:Eubacteriaceae;Genus:NA;Species:NA;	3	0	0	0	0	1	1	0	0	0	0	0	0	1	0	3	0	1	0	0	2	0	1	0	0	1	1	0	0	1	0	0	0	1	2	2	1	2	0	0
OTU714	Primary:Bacteria;Phylum:Bacillota;Class:Clostridia;Order:Eubacteriales;Family:NA;Genus:NA;Species:NA;	6	0	0	0	0	1	0	0	1	0	0	0	1	0	0	4	0	0	0	0	0	0	0	0	0	4	0	0	0	0	0	0	0	0	0	0	0	0	0	3
OTU715	Primary:Bacteria;Phylum:Actinomycetota;Class:Actinobacteria;Order:Micrococcales;Family:Micrococcaceae;Genus:Rothia;Species:Rothia_nasimurium;	1	1	2	0	2	0	1	0	1	0	0	0	0	2	2	1	0	0	0	1	0	0	2	0	1	0	0	0	1	1	2	0	1	0	0	1	1	0	4	0
OTU716	Primary:Bacteria;Phylum:Bacillota;Class:Clostridia;Order:Eubacteriales;Family:Oscillospiraceae;Genus:NA;Species:NA;	0	0	2	1	2	0	0	0	1	0	1	1	2	1	0	0	0	2	1	1	0	0	0	1	0	0	0	0	0	1	0	0	1	0	0	0	0	0	0	0
OTU717	Primary:Bacteria;Phylum:Bacillota;Class:Clostridia;Order:Eubacteriales;Family:NA;Genus:NA;Species:NA;	3	1	0	0	7	0	0	3	2	0	0	2	1	0	2	0	0	0	0	1	0	0	1	0	0	0	0	0	0	0	0	0	0	0	4	0	0	0	2	0
OTU718	Primary:Bacteria;Phylum:Bacillota;Class:Clostridia;Order:Eubacteriales;Family:NA;Genus:NA;Species:NA;	7	9	0	1	10	1	1	4	3	3	1	4	0	0	9	0	0	1	0	16	0	1	3	1	0	1	0	6	0	0	1	0	1	0	8	0	1	0	5	0
OTU72	Primary:Bacteria;Phylum:NA;Class:NA;Order:NA;Family:NA;Genus:NA;Species:NA;	39	74	42	34	134	18	26	140	113	51	103	177	57	55	110	168	32	85	38	79	100	19	109	171	26	51	39	71	68	87	306	174	114	62	73	168	295	172	14	142
OTU720	Primary:Bacteria;Phylum:Bacillota;Class:Clostridia;Order:Eubacteriales;Family:Oscillospiraceae;Genus:NA;Species:NA;	0	1	0	0	4	0	0	1	0	1	0	0	0	0	1	0	0	0	0	0	0	0	0	0	0	2	0	0	0	0	0	0	0	0	4	0	0	0	2	0
OTU723	Primary:Bacteria;Phylum:Bacteroidota;Class:Bacteroidia;Order:Bacteroidales;Family:Bacteroidaceae;Genus:Phocaeicola;Species:Phocaeicola_coprocola;	2	1	1	0	0	0	0	0	0	1	0	0	0	0	1	0	0	0	1	0	0	0	0	0	1	0	0	0	0	0	1	0	0	0	0	0	0	0	19	0
OTU724	Primary:Bacteria;Phylum:Bacillota;Class:Clostridia;Order:Eubacteriales;Family:Lachnospiraceae;Genus:NA;Species:NA;	78	122	15	69	61	85	89	107	112	74	74	14	104	138	2	53	95	82	2	3	19	181	54	390	72	19	128	17	42	54	78	129	266	286	19	98	236	119	14	39
OTU725	Primary:Bacteria;Phylum:Bacillota;Class:Negativicutes;Order:Acidaminococcales;Family:Acidaminococcaceae;Genus:Phascolarctobacterium;Species:Phascolarctobacterium_succinatutens;	4	1	1	3	2	2	3	0	0	2	4	3	1	3	3	0	1	6	2	3	4	2	0	0	0	0	0	0	0	2	0	0	0	0	0	1	1	0	0	1
OTU727	Primary:Bacteria;Phylum:Bacteroidota;Class:Bacteroidia;Order:Bacteroidales;Family:Rikenellaceae;Genus:Alistipes;Species:Alistipes_indistinctus;	1	5	0	0	5	0	0	0	0	1	0	1	2	0	1	0	0	0	0	6	0	0	0	0	1	0	0	0	1	0	0	0	0	0	0	0	0	0	3	0
OTU729	Primary:Bacteria;Phylum:Bacillota;Class:NA;Order:NA;Family:NA;Genus:NA;Species:NA;	1	0	0	0	1	1	0	3	2	0	0	0	0	0	0	1	0	0	0	1	0	0	1	0	0	1	0	0	0	0	0	1	1	0	10	0	1	0	0	0
OTU73	Primary:Bacteria;Phylum:Bacillota;Class:Erysipelotrichia;Order:Erysipelotrichales;Family:Erysipelotrichaceae;Genus:Faecalicoccus;Species:NA;	79	414	89	75	28	54	24	113	53	37	84	193	193	57	401	154	21	43	136	153	391	14	127	11	125	58	136	54	128	117	27	31	19	58	5	28	8	52	3	46
OTU730	Primary:Bacteria;Phylum:Bacillota;Class:Clostridia;Order:Eubacteriales;Family:Oscillospiraceae;Genus:NA;Species:NA;	3	1	0	2	1	0	0	0	1	0	1	1	1	3	1	3	0	0	2	0	0	3	0	2	2	0	2	0	1	2	1	0	3	0	1	0	1	5	0	1
OTU731	Primary:Bacteria;Phylum:Bacillota;Class:Clostridia;Order:Eubacteriales;Family:NA;Genus:NA;Species:NA;	257	102	249	472	113	658	259	105	386	213	125	634	170	326	127	387	215	105	12	12	564	541	200	497	581	364	478	34	703	202	197	461	154	904	109	636	271	197	17	350
OTU732	Primary:Bacteria;Phylum:Bacillota;Class:Clostridia;Order:Eubacteriales;Family:Oscillospiraceae;Genus:NA;Species:NA;	1	1	1	0	1	3	2	0	2	1	5	0	0	1	1	0	1	0	2	0	1	1	1	0	1	2	0	0	1	0	0	0	0	0	0	0	0	1	0	0
OTU733	Primary:Bacteria;Phylum:Bacillota;Class:Erysipelotrichia;Order:Erysipelotrichales;Family:Erysipelotrichaceae;Genus:Massilimicrobiota;Species:Massilimicrobiota_timonensis;	2	50	3	5	49	4	3	2	1	11	1	126	4	1	47	3	5	4	13	11	4	3	12	1	4	4	32	11	3	0	2	4	10	11	3	23	0	3	2	9
OTU734	Primary:Bacteria;Phylum:Bacillota;Class:Bacilli;Order:Caryophanales;Family:Bacillaceae;Genus:NA;Species:NA;	0	0	12	0	0	0	0	0	0	0	9	0	0	0	0	0	0	0	0	0	0	4	0	0	1	0	0	0	0	4	0	0	0	0	0	4	0	0	1	0
OTU735	Primary:Bacteria;Phylum:Bacillota;Class:Clostridia;Order:Eubacteriales;Family:Lachnospiraceae;Genus:NA;Species:NA;	1	8	6	1	6	1	8	15	0	1	4	0	2	5	5	1	2	1	0	1	1	0	0	0	0	0	0	0	0	1	0	0	0	0	0	0	0	1	0	2
OTU736	Primary:Bacteria;Phylum:Bacillota;Class:Clostridia;Order:Eubacteriales;Family:Oscillospiraceae;Genus:NA;Species:NA;	10	5	9	29	12	14	28	9	49	30	29	25	24	11	29	9	25	9	24	3	36	23	2	64	33	16	14	2	58	10	22	17	16	10	5	8	13	4	3	13
OTU74	Primary:Bacteria;Phylum:Bacillota;Class:Clostridia;Order:Eubacteriales;Family:NA;Genus:NA;Species:NA;	12	12	2	72	17	28	8	5	57	149	18	189	1	1	0	28	97	121	2	27	55	22	56	130	363	42	350	6	104	44	156	107	82	18	4	50	1	35	5	45
OTU742	Primary:Bacteria;Phylum:Bacillota;Class:Clostridia;Order:Eubacteriales;Family:Oscillospiraceae;Genus:NA;Species:NA;	0	3	2	0	0	0	0	3	0	0	2	0	1	0	0	1	0	0	1	2	0	0	2	0	0	0	0	0	0	1	0	0	1	0	3	0	0	0	0	0
OTU743	Primary:Bacteria;Phylum:Bacillota;Class:Clostridia;Order:Eubacteriales;Family:NA;Genus:NA;Species:NA;	2	6	0	0	2	7	0	3	0	0	1	1	0	0	3	0	0	0	0	2	0	0	2	1	1	0	0	3	0	0	0	0	1	1	12	0	3	0	6	0
OTU744	Primary:Bacteria;Phylum:Bacillota;Class:Clostridia;Order:Eubacteriales;Family:Christensenellaceae;Genus:Guopingia;Species:Guopingia_tenuis;	0	0	1	2	0	0	2	0	3	1	3	0	2	0	0	3	0	0	0	0	1	3	0	2	2	0	0	0	6	0	5	0	1	3	0	2	2	0	0	1
OTU745	Primary:Bacteria;Phylum:Bacillota;Class:Clostridia;Order:Eubacteriales;Family:NA;Genus:NA;Species:NA;	0	0	0	0	0	0	0	3	0	0	0	0	0	0	1	0	0	0	0	1	0	0	1	0	0	0	0	0	0	0	1	0	0	0	0	0	0	0	13	0
OTU746	Primary:Bacteria;Phylum:Bacillota;Class:Clostridia;Order:Eubacteriales;Family:NA;Genus:NA;Species:NA;	18	12	60	79	68	2	3	4	54	17	7	21	61	2	21	43	4	13	0	1	24	2	5	3	6	4	83	1	157	113	13	38	21	184	5	23	76	29	1	7
OTU747	Primary:Bacteria;Phylum:Bacillota;Class:NA;Order:NA;Family:NA;Genus:NA;Species:NA;	0	0	0	5	0	5	0	0	0	0	0	0	0	0	0	0	0	2	0	0	0	6	0	0	0	1	0	0	0	0	0	1	0	0	0	0	0	0	0	0
OTU748	Primary:Bacteria;Phylum:Bacillota;Class:Clostridia;Order:Eubacteriales;Family:Lachnospiraceae;Genus:Blautia;Species:NA;	5	9	4	0	2	2	8	0	8	5	3	1	1	0	1	0	5	12	2	0	6	0	0	0	0	0	0	0	0	2	1	0	0	0	0	0	0	0	0	0
OTU75	Primary:Bacteria;Phylum:Pseudomonadota;Class:Deltaproteobacteria;Order:Desulfovibrionales;Family:Desulfovibrionaceae;Genus:Desulfovibrio;Species:Desulfovibrio_piger;	132	394	39	2	171	9	6	14	29	14	6	26	27	8	92	0	1	6	8	599	2	6	125	5	3	14	10	233	16	6	2	2	6	0	343	3	19	3	91	4
OTU750	Primary:Bacteria;Phylum:Bacillota;Class:Clostridia;Order:Eubacteriales;Family:Clostridiaceae1;Genus:Clostridiumsensustricto;Species:NA;	1	0	2	1	0	1	0	0	0	1	1	0	0	0	0	0	0	1	0	0	1	0	0	0	0	0	0	0	1	2	1	0	0	0	0	3	0	0	0	0
OTU752	Primary:Bacteria;Phylum:Bacillota;Class:Clostridia;Order:Eubacteriales;Family:Oscillospiraceae;Genus:NA;Species:NA;	2	2	1	4	2	1	1	0	1	0	0	0	1	0	0	1	0	0	0	0	1	0	3	0	0	0	1	0	1	2	0	1	0	2	1	1	1	0	1	0
OTU754	Primary:Bacteria;Phylum:Deferribacterota;Class:Deferribacteres;Order:Deferribacterales;Family:Deferribacteraceae;Genus:Mucispirillum;Species:Mucispirillum_schaedleri;	45	69	2	1	57	3	0	22	24	11	3	11	0	0	18	0	2	0	1	59	0	2	5	1	4	1	3	1	9	2	11	2	0	1	392	2	7	2	534	2
OTU758	Primary:Bacteria;Phylum:Bacillota;Class:Clostridia;Order:Eubacteriales;Family:Oscillospiraceae;Genus:Anaerotruncus;Species:Anaerotruncus_rubiinfantis;	0	0	0	0	4	0	0	3	1	1	0	1	0	0	2	0	0	0	0	5	0	0	1	0	0	0	0	3	1	0	0	1	0	0	3	0	4	0	2	0
OTU76	Primary:Bacteria;Phylum:Bacillota;Class:Bacilli;Order:Lactobacillales;Family:Lactobacillaceae;Genus:Ligilactobacillus;Species:Ligilactobacillus_agilis;	2	3	0	1	20	1	8	1	1	18	20	175	8	0	3	106	6	8	3	2	62	43	4	94	44	34	13	1	15	6	41	24	332	41	114	48	10	324	11	7
OTU760	Primary:Bacteria;Phylum:Bacillota;Class:Clostridia;Order:NA;Family:NA;Genus:NA;Species:NA;	2	0	1	1	0	0	0	0	0	0	2	1	2	0	1	0	2	0	0	4	0	0	0	0	0	0	0	0	2	0	4	0	2	0	0	1	1	0	0	1
OTU761	Primary:Bacteria;Phylum:Bacillota;Class:Clostridia;Order:Eubacteriales;Family:Christensenellaceae;Genus:NA;Species:NA;	1	0	0	0	0	0	0	0	2	0	1	0	2	0	0	5	0	0	0	0	0	1	0	0	0	0	0	0	0	0	0	0	0	0	2	1	0	1	0	2
OTU762	Primary:Bacteria;Phylum:Bacillota;Class:Clostridia;Order:Eubacteriales;Family:NA;Genus:NA;Species:NA;	32	10	14	1	2	23	8	37	0	5	14	2	7	15	6	1	16	2	0	1	7	34	7	366	27	148	0	5	3	201	13	22	12	109	3	5	12	2	9	31
OTU764	Primary:Bacteria;Phylum:Bacillota;Class:Clostridia;Order:Eubacteriales;Family:Oscillospiraceae;Genus:Lawsonibacter;Species:NA;	4	8	5	4	4	4	6	1	0	3	1	1	1	2	5	3	8	1	0	4	0	1	0	0	1	0	0	0	0	0	0	0	0	0	0	1	1	0	4	1
OTU765	Primary:Bacteria;Phylum:Bacillota;Class:Clostridia;Order:Eubacteriales;Family:NA;Genus:NA;Species:NA;	0	1	0	0	1	0	0	0	0	0	0	0	0	1	0	0	0	0	2	1	0	0	0	0	0	1	0	0	0	0	1	0	0	2	0	0	0	0	0	0
OTU766	Primary:Bacteria;Phylum:Bacillota;Class:Clostridia;Order:Eubacteriales;Family:Oscillospiraceae;Genus:NA;Species:NA;	0	0	0	0	0	0	0	0	3	0	4	1	1	0	0	2	1	0	0	0	0	0	0	1	0	1	1	0	0	0	0	0	1	0	0	0	0	1	0	0
OTU767	Primary:Bacteria;Phylum:Bacillota;Class:Clostridia;Order:Eubacteriales;Family:Oscillospiraceae;Genus:NA;Species:NA;	2	1	1	0	2	0	0	2	1	1	0	0	0	0	1	0	0	0	1	1	0	0	0	0	0	0	0	3	0	1	0	1	0	0	6	0	0	0	1	0
OTU768	Primary:Bacteria;Phylum:Bacillota;Class:Clostridia;Order:Eubacteriales;Family:Lachnospiraceae;Genus:NA;Species:NA;	8	32	29	20	15	16	29	31	69	31	39	45	59	48	41	13	22	30	187	22	31	28	24	16	26	26	76	16	61	68	76	23	52	21	0	33	134	95	7	45
OTU769	Primary:Bacteria;Phylum:Cyanobacteriota;Class:Cyanophyceae;Order:NA;Family:NA;Genus:NA;Species:NA;	0	0	1	0	0	0	1	0	0	0	0	1	1	0	0	0	0	0	0	0	0	0	0	1	3	1	0	0	0	0	2	0	0	1	0	2	0	0	2	1
OTU77	Primary:Bacteria;Phylum:Bacillota;Class:Bacilli;Order:Lactobacillales;Family:Lactobacillaceae;Genus:Ligilactobacillus;Species:Ligilactobacillus_salivarius;	60	19	91	58	22	33	27	38	44	38	63	54	77	43	19	40	21	59	19	22	43	26	14	33	23	30	29	3	37	24	91	65	103	34	133	78	53	81	11	59
OTU770	Primary:Bacteria;Phylum:Bacillota;Class:Clostridia;Order:Eubacteriales;Family:Oscillospiraceae;Genus:Ruminococcus;Species:Ruminococcus_callidus;	1	4	1	2	2	1	0	2	1	3	2	1	2	1	0	0	1	2	1	3	0	1	0	0	1	0	0	0	0	0	0	0	0	0	0	0	1	0	1	0
OTU771	Primary:Bacteria;Phylum:Bacillota;Class:Clostridia;Order:Eubacteriales;Family:Oscillospiraceae;Genus:NA;Species:NA;	1	2	0	1	0	0	0	0	0	0	0	0	0	0	0	0	0	1	0	1	0	0	2	0	0	0	0	0	0	0	0	0	0	0	4	0	1	0	5	0
OTU773	Primary:Bacteria;Phylum:Bacillota;Class:Erysipelotrichia;Order:Erysipelotrichales;Family:Erysipelotrichaceae;Genus:Faecalibacillus;Species:Faecalibacillus_intestinalis;	0	0	0	0	0	0	0	0	0	0	0	0	0	0	0	0	0	0	0	0	0	0	0	0	0	0	0	0	0	0	0	0	0	0	0	0	0	0	0	0
OTU774	Primary:Bacteria;Phylum:Bacillota;Class:Clostridia;Order:Eubacteriales;Family:Lachnospiraceae;Genus:NA;Species:NA;	6	8	5	5	0	1	2	2	5	1	5	8	2	1	1	1	1	2	6	1	0	0	0	0	0	0	1	0	1	1	1	0	0	0	0	0	1	1	0	1
OTU775	Primary:Bacteria;Phylum:Bacillota;Class:NA;Order:NA;Family:NA;Genus:NA;Species:NA;	21	2	0	0	6	7	0	0	0	0	2	0	2	5	2	0	0	0	0	0	0	1	4	0	6	2	0	0	0	0	0	1	0	0	8	0	0	0	1	1
OTU776	Primary:Bacteria;Phylum:Bacteroidota;Class:Bacteroidia;Order:Bacteroidales;Family:Muribaculaceae;Genus:NA;Species:NA;	3	0	6	1	1	3	3	5	0	1	2	1	2	1	0	0	0	0	0	0	0	0	0	0	0	0	0	1	0	0	0	0	0	0	0	0	0	0	0	2
OTU778	Primary:Bacteria;Phylum:Bacillota;Class:Clostridia;Order:Eubacteriales;Family:Oscillospiraceae;Genus:NA;Species:NA;	2	1	0	0	1	0	2	0	0	0	0	1	0	0	3	0	0	1	2	1	0	1	1	1	0	0	0	2	0	0	0	0	0	0	3	0	0	0	1	1
OTU779	Primary:Bacteria;Phylum:Bacteroidota;Class:NA;Order:NA;Family:NA;Genus:NA;Species:NA;	0	0	0	0	0	0	0	0	0	0	0	0	0	0	0	0	0	0	0	0	0	0	0	0	0	0	0	0	0	0	0	0	0	0	0	0	0	0	0	0
OTU78	Primary:Bacteria;Phylum:Bacillota;Class:NA;Order:NA;Family:NA;Genus:NA;Species:NA;	12	51	357	218	48	339	284	66	65	464	1069	27	200	88	155	40	113	227	84	1	497	325	185	307	450	588	51	8	874	57	80	51	25	41	35	62	60	51	13	136
OTU780	Primary:Bacteria;Phylum:Bacillota;Class:Clostridia;Order:Eubacteriales;Family:Oscillospiraceae;Genus:NA;Species:NA;	0	0	0	0	2	1	0	0	0	0	0	1	1	0	0	2	0	0	0	0	0	1	0	1	2	0	0	0	0	1	0	0	1	0	0	1	1	0	0	1
OTU781	Primary:Bacteria;Phylum:Bacillota;Class:Clostridia;Order:Eubacteriales;Family:Oscillospiraceae;Genus:NA;Species:NA;	0	0	1	0	2	0	0	2	0	0	1	0	0	0	0	0	0	0	0	0	1	0	1	0	0	0	0	0	0	0	0	0	0	1	0	0	2	1	0	0
OTU782	Primary:Bacteria;Phylum:Bacillota;Class:NA;Order:NA;Family:NA;Genus:NA;Species:NA;	0	9	0	0	1	12	0	0	1	0	0	0	1	0	0	0	0	0	0	0	0	1	0	0	0	0	0	0	0	1	0	0	0	0	1	0	0	0	0	0
OTU783	Primary:Bacteria;Phylum:Bacillota;Class:Clostridia;Order:Eubacteriales;Family:NA;Genus:NA;Species:NA;	1	1	0	0	1	0	0	1	0	0	0	0	0	0	2	0	0	0	0	0	0	0	0	0	0	0	0	1	0	0	0	0	0	0	2	0	0	0	3	0
OTU784	Primary:Bacteria;Phylum:Bacillota;Class:Clostridia;Order:Eubacteriales;Family:Lachnospiraceae;Genus:NA;Species:NA;	6	3	0	0	4	0	0	0	1	0	0	0	0	0	1	0	0	0	0	1	0	1	3	0	0	0	0	1	0	0	0	0	0	1	8	1	0	0	0	0
OTU785	Primary:Bacteria;Phylum:Bacillota;Class:Clostridia;Order:Eubacteriales;Family:Oscillospiraceae;Genus:NA;Species:NA;	0	0	4	1	0	0	3	5	3	2	4	4	0	1	0	4	0	3	4	0	2	1	2	1	2	0	2	0	0	3	4	1	3	2	2	2	1	6	1	6
OTU79	Primary:Bacteria;Phylum:Bacillota;Class:Clostridia;Order:Eubacteriales;Family:NA;Genus:NA;Species:NA;	2	3	1	1	2	1	4	4	4	44	124	0	1	6	0	0	2	2	1	3	1	0	1	1	4	5	67	0	0	1	0	378	1	33	0	34	240	90	1	4
OTU790	Primary:Bacteria;Phylum:Bacillota;Class:Clostridia;Order:Eubacteriales;Family:NA;Genus:NA;Species:NA;	27	24	123	90	28	27	18	20	48	62	74	52	54	335	79	11	49	21	55	4	80	130	50	26	13	55	49	19	305	14	74	51	49	140	7	43	48	90	4	48
OTU791	Primary:Bacteria;Phylum:Bacillota;Class:Clostridia;Order:Eubacteriales;Family:NA;Genus:NA;Species:NA;	0	1	0	0	0	1	0	1	0	0	0	0	2	0	0	0	0	0	0	0	1	0	2	1	0	0	1	0	0	1	1	0	0	1	0	2	0	1	0	0
OTU793	Primary:Bacteria;Phylum:Bacillota;Class:Clostridia;Order:Eubacteriales;Family:NA;Genus:NA;Species:NA;	4	5	7	5	3	1	10	7	11	8	7	40	1	11	25	26	8	15	5	2	11	5	3	3	2	4	5	1	5	4	22	11	10	10	2	12	16	6	5	3
OTU794	Primary:Bacteria;Phylum:Bacillota;Class:Clostridia;Order:Eubacteriales;Family:Christensenellaceae;Genus:NA;Species:NA;	1	1	0	0	4	2	1	0	0	0	0	0	1	2	0	0	0	7	0	0	1	0	0	0	0	0	0	0	0	0	0	1	0	0	2	0	0	0	0	0
OTU795	Primary:Bacteria;Phylum:Bacillota;Class:Bacilli;Order:Lactobacillales;Family:Lactobacillaceae;Genus:Limosilactobacillus;Species:Limosilactobacillus_fermentum;	1	0	0	0	0	0	0	0	0	0	1	1	0	0	0	0	0	0	0	0	0	0	0	1	0	0	0	0	3	1	1	0	0	1	2	2	1	2	2	1
OTU796	Primary:Bacteria;Phylum:Bacillota;Class:Clostridia;Order:Eubacteriales;Family:Oscillospiraceae;Genus:Neglecta;Species:Neglecta_timonensis;	0	0	0	0	0	1	1	0	0	0	1	0	0	0	0	0	0	0	0	0	1	1	0	0	0	0	1	1	0	1	0	0	0	2	0	1	1	1	0	0
OTU8	Primary:Bacteria;Phylum:Bacillota;Class:Clostridia;Order:Eubacteriales;Family:Oscillospiraceae;Genus:Gemmiger;Species:NA;	271	357	429	1446	181	1344	952	289	440	468	814	159	345	182	273	258	615	493	108	93	504	507	252	917	662	369	1946	72	431	236	836	454	1225	2193	36	383	108	673	43	223
OTU80	Primary:Bacteria;Phylum:Bacillota;Class:Clostridia;Order:Eubacteriales;Family:Christensenellaceae;Genus:NA;Species:NA;	66	166	26	64	76	104	111	94	82	82	202	421	254	4	10	190	71	128	2	7	1849	158	28	140	380	31	41	6	59	29	124	254	186	31	16	194	134	580	32	47
OTU801	Primary:Bacteria;Phylum:Bacillota;Class:Clostridia;Order:Eubacteriales;Family:Lachnospiraceae;Genus:Sporofaciens;Species:Sporofaciens_musculi;	3	9	7	2	3	3	3	4	1	3	1	1	5	1	2	3	1	0	4	2	0	1	0	0	0	0	0	0	0	0	0	0	0	0	0	0	0	0	0	2
OTU804	Primary:Bacteria;Phylum:Bacillota;Class:Clostridia;Order:Eubacteriales;Family:Oscillospiraceae;Genus:NA;Species:NA;	1	0	0	0	2	0	0	0	1	0	0	0	0	0	1	0	0	0	0	0	0	0	3	1	0	0	0	0	0	0	0	0	0	0	1	0	0	0	0	1
OTU808	Primary:Bacteria;Phylum:Actinomycetota;Class:Actinobacteria;Order:Bifidobacteriales;Family:Bifidobacteriaceae;Genus:Bifidobacterium;Species:Bifidobacterium_pseudolongum;	4	3	0	0	3	0	0	1	0	0	0	0	2	0	0	0	1	0	0	0	1	0	0	0	1	0	0	0	0	0	0	0	0	0	0	1	0	0	0	0
OTU81	Primary:Bacteria;Phylum:Bacillota;Class:Clostridia;Order:Eubacteriales;Family:NA;Genus:NA;Species:NA;	2	64	15	78	50	236	125	227	58	181	60	213	14	6	6	2406	21	47	4	4	263	56	49	92	93	46	98	12	173	66	150	230	322	1129	21	473	122	614	8	24
OTU811	Primary:Bacteria;Phylum:Bacillota;Class:Clostridia;Order:Eubacteriales;Family:NA;Genus:NA;Species:NA;	19	11	11	197	21	73	41	18	24	14	40	28	13	38	15	17	39	24	16	1	28	58	36	35	30	30	49	6	54	24	60	89	26	156	8	50	101	38	17	47
OTU814	Primary:Bacteria;Phylum:Bacillota;Class:NA;Order:NA;Family:NA;Genus:NA;Species:NA;	0	0	0	0	0	0	0	0	0	0	0	0	0	0	0	0	0	0	0	0	0	0	0	0	0	0	0	0	0	0	0	0	0	0	0	0	0	0	0	0
OTU815	Primary:Bacteria;Phylum:Pseudomonadota;Class:Gammaproteobacteria;Order:Pseudomonadales;Family:Moraxellaceae;Genus:Acinetobacter;Species:Acinetobacter_baumannii;	0	0	0	2	0	0	0	1	0	0	0	1	0	0	0	1	0	0	0	2	0	0	0	1	1	1	0	0	0	3	0	0	0	0	0	1	0	0	0	0
OTU816	Primary:Bacteria;Phylum:Bacillota;Class:Clostridia;Order:Eubacteriales;Family:NA;Genus:NA;Species:NA;	0	1	0	0	5	0	0	0	0	0	0	0	0	0	3	0	0	1	0	6	0	1	3	1	0	0	0	0	5	0	0	0	0	0	0	0	0	0	2	0
OTU817	Primary:Bacteria;Phylum:Bacillota;Class:Clostridia;Order:Eubacteriales;Family:Oscillospiraceae;Genus:NA;Species:NA;	0	0	1	0	1	0	0	0	0	0	0	1	3	0	1	1	0	0	0	2	0	0	2	0	0	0	0	0	0	0	0	0	0	0	0	0	1	0	0	0
OTU818	Primary:Bacteria;Phylum:Bacillota;Class:Clostridia;Order:Eubacteriales;Family:NA;Genus:NA;Species:NA;	4	0	0	1	0	0	0	1	0	2	0	1	0	0	1	0	0	0	0	0	1	1	1	1	0	0	0	3	0	0	2	1	0	2	0	1	1	0	0	0
OTU82	Primary:Bacteria;Phylum:Bacillota;Class:NA;Order:NA;Family:NA;Genus:NA;Species:NA;	38	36	79	66	59	61	152	27	133	386	90	228	92	27	30	107	204	66	4	2	90	192	168	121	549	461	133	21	151	40	29	26	189	68	26	25	4	4	10	62
OTU820	Primary:Bacteria;Phylum:Bacillota;Class:Clostridia;Order:Eubacteriales;Family:NA;Genus:NA;Species:NA;	267	230	91	1231	145	1179	1027	123	136	291	278	126	208	998	100	803	424	142	29	11	79	386	149	248	137	145	117	23	140	267	452	211	173	932	51	769	147	145	33	445
OTU821	Primary:Bacteria;Phylum:Bacillota;Class:Clostridia;Order:Eubacteriales;Family:Eubacteriales;Genus:NA;Species:NA;	0	0	2	0	1	0	0	1	0	0	0	0	0	0	1	2	0	0	0	0	0	0	1	0	0	0	1	1	1	1	0	1	0	0	1	0	1	0	0	1
OTU823	Primary:Bacteria;Phylum:Bacillota;Class:Clostridia;Order:Eubacteriales;Family:Lachnospiraceae;Genus:NA;Species:NA;	0	1	6	0	0	0	0	0	0	0	0	0	0	0	0	0	1	0	0	0	0	0	0	1	0	1	0	2	0	0	1	2	0	0	1	0	1	0	0	0
OTU824	Primary:Bacteria;Phylum:Actinomycetota;Class:Coriobacteriia;Order:Eggerthellales;Family:Eggerthellaceae;Genus:Rubneribacter;Species:Rubneribacter_badeniensis;	0	0	0	0	0	0	0	0	0	0	0	0	0	0	0	0	0	0	0	0	0	0	0	0	0	0	0	0	0	0	0	0	0	0	0	0	0	0	0	0
OTU825	Primary:Bacteria;Phylum:Bacillota;Class:Clostridia;Order:Eubacteriales;Family:Lachnospiraceae;Genus:Anaerotignum;Species:Anaerotignum_aminivorans;	4	3	0	0	3	0	1	2	0	0	0	0	1	0	0	1	0	0	1	0	1	1	3	1	0	1	1	1	0	1	1	0	0	1	1	0	0	0	0	0
OTU829	Primary:Bacteria;Phylum:Bacillota;Class:Negativicutes;Order:Veillonellales;Family:Veillonellaceae;Genus:Veillonella;Species:Veillonella_caviae;	2	2	0	0	0	0	1	0	0	5	0	0	1	0	0	0	6	4	0	0	0	0	0	0	0	0	0	0	0	2	0	1	0	0	0	1	0	0	0	0
OTU83	Primary:Bacteria;Phylum:Bacteroidota;Class:Bacteroidia;Order:Bacteroidales;Family:Odoribacteraceae;Genus:Odoribacter;Species:NA;	228	511	0	3	75	5	7	142	20	17	1	17	25	1	311	2	1	6	3	297	0	12	368	8	9	16	3	593	5	5	1	2	0	7	35	0	1	0	118	0
OTU830	Primary:Bacteria;Phylum:Bacillota;Class:Clostridia;Order:Eubacteriales;Family:Oscillospiraceae;Genus:NA;Species:NA;	5	2	4	2	7	4	5	10	4	10	4	2	6	23	14	5	2	3	5	0	1	1	2	1	0	1	1	0	3	5	5	14	4	2	7	1	8	2	1	1
OTU834	Primary:Bacteria;Phylum:Bacillota;Class:Clostridia;Order:Eubacteriales;Family:Lachnospiraceae;Genus:NA;Species:NA;	1	0	1	13	3	0	0	0	0	0	0	1	2	0	1	0	1	0	2	11	0	0	0	0	0	0	0	0	1	0	0	0	0	0	0	1	0	0	0	0
OTU836	Primary:Bacteria;Phylum:Bacillota;Class:Clostridia;Order:Eubacteriales;Family:Oscillospiraceae;Genus:NA;Species:NA;	0	3	0	0	1	0	1	1	0	0	0	0	2	0	0	3	0	1	0	0	0	0	1	0	0	0	0	0	0	1	2	0	0	0	0	0	0	0	0	0
OTU839	Primary:Bacteria;Phylum:Bacillota;Class:Clostridia;Order:Eubacteriales;Family:Oscillospiraceae;Genus:NA;Species:NA;	1	1	0	0	1	0	0	2	0	0	0	0	0	0	0	0	0	0	0	4	0	0	3	0	0	0	0	1	0	0	0	0	0	0	7	0	0	0	2	0
OTU84	Primary:Bacteria;Phylum:Actinomycetota;Class:Coriobacteriia;Order:Coriobacteriales;Family:Coriobacteriaceae;Genus:Enorma;Species:Enorma_phocaeensis;	82	13	92	33	58	8	131	6	15	50	43	27	45	161	52	12	91	47	29	31	56	44	44	28	19	66	33	21	44	80	56	40	66	46	12	10	13	9	6	30
OTU841	Primary:Bacteria;Phylum:Bacillota;Class:Clostridia;Order:Eubacteriales;Family:NA;Genus:NA;Species:NA;	0	0	0	0	0	0	1	0	0	1	0	1	0	0	0	4	0	0	0	0	0	0	2	0	0	0	0	0	0	0	1	1	0	2	0	1	1	0	1	0
OTU842	Primary:Bacteria;Phylum:Bacillota;Class:Clostridia;Order:Eubacteriales;Family:Oscillospiraceae;Genus:NA;Species:NA;	0	0	0	0	0	0	0	3	1	0	0	0	0	0	0	0	0	1	0	2	0	0	0	0	1	0	0	0	0	0	0	0	0	0	2	0	0	0	1	1
OTU847	Primary:Bacteria;Phylum:Bacillota;Class:Clostridia;Order:Eubacteriales;Family:Oscillospiraceae;Genus:NA;Species:NA;	190	8	14	57	258	33	449	55	112	84	924	4	632	8	5	4	99	199	6	4	1	33	29	13	37	650	266	20	1	10	46	14	277	1	1	21	4	3	7	221
OTU849	Primary:Bacteria;Phylum:Bacillota;Class:Clostridia;Order:Eubacteriales;Family:NA;Genus:NA;Species:NA;	16	11	7	49	11	95	61	9	26	9	15	19	15	45	15	33	29	10	3	3	5	29	18	13	13	15	28	5	4	23	124	23	19	44	2	50	21	21	3	38
OTU85	Primary:Bacteria;Phylum:Bacillota;Class:Clostridia;Order:Eubacteriales;Family:Lachnospiraceae;Genus:NA;Species:NA;	10	18	76	7	27	18	191	55	35	47	201	52	96	53	21	6	113	67	9	25	34	24	22	62	4	122	62	9	73	84	74	23	9	11	14	21	26	38	13	53
OTU852	Primary:Bacteria;Phylum:Bacillota;Class:Clostridia;Order:Eubacteriales;Family:Peptostreptococcaceae;Genus:Terrisporobacter;Species:Terrisporobacter_glycolicus;	1	3	3	3	0	2	9	0	3	3	0	2	0	1	3	0	1	1	2	2	3	0	0	0	0	0	0	0	0	0	1	0	0	0	0	0	0	0	0	0
OTU853	Primary:Bacteria;Phylum:Bacillota;Class:Clostridia;Order:Eubacteriales;Family:Oscillospiraceae;Genus:Neglecta;Species:Neglecta_timonensis;	19	25	86	26	43	2	23	52	35	13	11	15	101	55	57	22	5	47	51	27	2	10	13	0	3	27	49	16	33	4	6	10	10	9	21	25	15	26	8	148
OTU856	Primary:Bacteria;Phylum:Bacillota;Class:Clostridia;Order:Eubacteriales;Family:Oscillospiraceae;Genus:NA;Species:NA;	0	0	1	0	1	0	0	1	0	0	1	0	1	0	0	0	0	0	2	1	0	0	0	0	0	0	1	0	0	0	0	0	2	1	0	0	0	0	0	0
OTU859	Primary:Bacteria;Phylum:Bacillota;Class:Clostridia;Order:Eubacteriales;Family:NA;Genus:NA;Species:NA;	2	8	66	74	31	69	393	4	39	23	83	22	12	82	38	13	9	206	1	1	108	64	12	60	12	7	161	2	6	46	191	37	40	60	10	48	88	83	6	11
OTU86	Primary:Bacteria;Phylum:Bacillota;Class:Clostridia;Order:Eubacteriales;Family:Oscillospiraceae;Genus:Butyricicoccus;Species:NA;	15	45	41	15	71	26	18	38	30	23	12	42	26	18	84	35	14	39	11	93	35	18	72	23	24	9	13	16	10	19	88	37	61	13	71	22	74	24	26	18
OTU861	Primary:NA;Phylum:NA;Class:NA;Order:NA;Family:NA;Genus:NA;Species:NA;	0	0	0	0	0	0	0	0	0	0	0	0	0	0	0	0	0	0	0	0	0	0	0	0	0	0	0	0	0	0	0	0	0	0	0	0	0	0	0	0
OTU862	Primary:Bacteria;Phylum:Bacillota;Class:Clostridia;Order:Eubacteriales;Family:NA;Genus:NA;Species:NA;	1	2	0	0	0	0	1	1	1	0	0	0	0	0	1	0	0	0	0	2	0	0	0	1	0	0	0	0	0	0	0	0	0	0	7	0	0	0	0	0
OTU866	Primary:Bacteria;Phylum:Bacillota;Class:Clostridia;Order:Eubacteriales;Family:NA;Genus:NA;Species:NA;	65	110	78	257	14	196	205	25	37	36	234	312	155	589	63	195	198	57	4	13	861	296	142	668	321	336	256	27	801	81	443	343	72	471	42	128	404	299	32	262
OTU867	Primary:Bacteria;Phylum:Bacillota;Class:Clostridia;Order:Eubacteriales;Family:Oscillospiraceae;Genus:NA;Species:NA;	0	0	1	0	1	0	0	0	0	0	1	0	0	0	1	1	0	0	0	2	0	1	0	0	0	0	0	0	0	1	0	1	0	0	0	0	0	0	0	0
OTU868	Primary:Bacteria;Phylum:Bacillota;Class:NA;Order:NA;Family:NA;Genus:NA;Species:NA;	77	7	32	7	12	16	13	8	22	66	20	3	12	3	11	51	2	28	1	1	22	13	23	41	41	4	22	2	53	34	45	43	21	12	5	3	96	14	1	60
OTU869	Primary:Bacteria;Phylum:Spirochaetota;Class:Spirochaetia;Order:Spirochaetales;Family:Sphaerochaetaceae;Genus:Sphaerochaeta;Species:NA;	2	3	1	0	1	5	3	0	1	2	0	1	0	5	0	3	0	7	0	1	1	0	0	0	0	0	0	1	0	0	1	0	0	0	0	0	0	0	0	0
OTU87	Primary:Bacteria;Phylum:Bacillota;Class:Erysipelotrichia;Order:Erysipelotrichales;Family:Coprobacillaceae;Genus:NA;Species:NA;	77	42	62	44	42	31	41	35	46	54	35	96	59	86	29	32	53	77	26	48	28	28	38	17	36	54	54	76	57	49	87	54	98	66	5	63	34	62	15	80
OTU872	Primary:Bacteria;Phylum:Bacillota;Class:Clostridia;Order:Eubacteriales;Family:Oscillospiraceae;Genus:Faecalibacterium;Species:Faecalibacterium_longum;	6	8	3	7	2	2	8	5	5	10	15	5	6	0	3	0	5	4	2	3	5	0	0	0	1	0	0	2	0	1	2	1	0	0	0	0	1	0	3	0
OTU873	Primary:Bacteria;Phylum:NA;Class:NA;Order:NA;Family:NA;Genus:NA;Species:NA;	0	0	0	0	7	0	0	0	1	0	0	0	0	0	0	1	1	0	0	1	0	1	0	0	0	0	0	0	0	0	0	0	0	0	7	0	0	0	0	0
OTU874	Primary:Bacteria;Phylum:Bacillota;Class:Clostridia;Order:Eubacteriales;Family:Christensenellaceae;Genus:Guopingia;Species:Guopingia_tenuis;	1	0	0	0	0	0	0	0	0	0	2	0	0	0	0	0	0	0	1	0	0	0	0	0	0	1	0	0	0	0	0	0	0	0	0	0	0	0	0	1
OTU875	Primary:Bacteria;Phylum:Bacteroidota;Class:Bacteroidia;Order:Bacteroidales;Family:NA;Genus:NA;Species:NA;	0	6	0	0	0	0	0	1	0	0	0	0	0	0	1	0	1	0	0	1	0	0	2	0	0	0	0	0	0	0	0	0	0	0	0	0	1	0	0	0
OTU879	Primary:Bacteria;Phylum:Actinomycetota;Class:Actinobacteria;Order:Pseudonocardiales;Family:Pseudonocardiaceae;Genus:NA;Species:NA;	0	0	0	0	0	0	0	0	1	0	0	0	1	0	0	0	0	0	0	0	0	0	0	0	3	0	0	0	0	0	3	0	0	0	0	0	0	0	3	0
OTU88	Primary:Bacteria;Phylum:Bacteroidota;Class:Bacteroidia;Order:Bacteroidales;Family:Bacteroidaceae;Genus:Phocaeicola;Species:Phocaeicola_barnesiae;	48	177	9	27	66	4	26	325	25	28	15	8	36	0	135	1	0	1	7	2702	6	13	28	17	15	22	3	1738	34	12	12	7	12	10	1871	5	18	2	592	6
OTU883	Primary:Bacteria;Phylum:Bacillota;Class:Clostridia;Order:Eubacteriales;Family:NA;Genus:NA;Species:NA;	228	340	13	66	15	269	14	5	20	146	12	15	9	0	0	91	33	85	1	5	99	63	52	1	44	80	30	6	5	2	6	5	21	21	2	217	123	32	5	60
OTU885	Primary:Bacteria;Phylum:Bacillota;Class:Clostridia;Order:Eubacteriales;Family:Oscillospiraceae;Genus:NA;Species:NA;	3	10	4	2	33	0	1	3	2	1	0	6	12	0	2	2	0	1	2	4	0	0	2	1	0	1	0	1	0	2	1	4	9	0	36	0	16	1	4	5
OTU886	Primary:Bacteria;Phylum:Bacillota;Class:Clostridia;Order:Eubacteriales;Family:NA;Genus:NA;Species:NA;	0	0	0	0	1	1	0	0	0	0	0	1	1	3	0	2	0	1	0	1	0	1	0	0	0	0	0	0	0	0	0	0	0	0	0	0	0	0	0	1
OTU889	Primary:Bacteria;Phylum:Bacillota;Class:Clostridia;Order:Eubacteriales;Family:Lachnospiraceae;Genus:NA;Species:NA;	42	62	20	94	33	34	10	31	11	33	17	12	12	37	50	12	6	6	28	18	24	6	39	39	14	1	22	10	5	7	28	15	45	5	8	37	4	34	8	4
OTU89	Primary:Bacteria;Phylum:Bacillota;Class:Clostridia;Order:Eubacteriales;Family:Lachnospiraceae;Genus:NA;Species:NA;	39	45	324	3	45	1	4	35	69	11	9	12	324	24	201	37	13	42	51	31	0	4	13	0	1	2	22	1	8	4	1	32	106	0	4	27	11	43	3	44
OTU890	Primary:Bacteria;Phylum:Bacillota;Class:Clostridia;Order:Eubacteriales;Family:Oscillospiraceae;Genus:NA;Species:NA;	1	0	0	0	0	0	0	3	0	0	2	1	0	2	1	0	0	1	0	1	0	0	0	0	0	1	3	1	0	0	0	1	0	1	0	0	0	0	0	0
OTU891	Primary:Bacteria;Phylum:NA;Class:NA;Order:NA;Family:NA;Genus:NA;Species:NA;	0	0	0	0	1	0	0	0	0	0	1	0	0	0	0	0	0	0	0	0	0	0	0	1	0	0	0	0	1	0	0	1	0	0	10	0	1	0	0	0
OTU893	Primary:Bacteria;Phylum:Bacillota;Class:Clostridia;Order:Eubacteriales;Family:NA;Genus:NA;Species:NA;	1	4	0	0	1	0	1	0	0	1	0	0	0	0	3	0	0	0	0	0	0	0	3	0	0	0	0	1	0	0	0	0	0	0	1	0	0	0	0	0
OTU894	Primary:Bacteria;Phylum:Bacillota;Class:Clostridia;Order:Eubacteriales;Family:Oscillospiraceae;Genus:NA;Species:NA;	0	1	2	0	2	0	1	3	1	0	1	0	0	0	0	1	0	1	0	2	1	2	3	0	0	0	0	0	0	1	0	1	0	0	0	0	0	1	0	1
OTU898	Primary:Bacteria;Phylum:Bacillota;Class:Clostridia;Order:Eubacteriales;Family:Lachnospiraceae;Genus:NA;Species:NA;	8	16	6	8	6	14	12	12	1	5	4	13	1	4	2	6	6	4	5	10	6	0	0	0	0	0	2	0	1	1	0	0	0	0	0	2	0	0	1	1
OTU899	Primary:Bacteria;Phylum:Bacillota;Class:Clostridia;Order:Eubacteriales;Family:Oscillospiraceae;Genus:NA;Species:NA;	1	4	2	0	2	0	0	1	1	0	3	3	0	0	0	0	0	0	0	0	0	0	1	2	0	0	2	0	0	0	0	0	1	0	0	1	1	1	0	1
OTU9	Primary:Bacteria;Phylum:Bacillota;Class:Clostridia;Order:Eubacteriales;Family:Oscillospiraceae;Genus:NA;Species:NA;	400	168	498	77	235	239	67	446	726	219	783	336	455	1158	383	598	191	734	585	100	39	393	84	70	48	137	286	80	4	379	729	650	553	212	65	388	352	420	38	1168
OTU90	Primary:Bacteria;Phylum:Bacillota;Class:Bacilli;Order:Lactobacillales;Family:Lactobacillaceae;Genus:Lactobacillus;Species:Lactobacillus_crispatus;	20	24	45	26	8	16	30	13	29	25	62	30	20	25	5	20	42	55	58	11	53	14	11	136	52	16	15	17	23	43	90	31	165	51	168	67	117	105	87	28
OTU901	Primary:Bacteria;Phylum:Bacillota;Class:Clostridia;Order:Eubacteriales;Family:Christensenellaceae;Genus:Gehongia;Species:Gehongia_tenuis;	1	0	0	0	1	0	0	1	0	0	0	0	2	1	0	0	0	0	0	1	0	1	0	0	1	0	0	0	0	0	0	0	0	0	1	0	0	0	0	1
OTU903	Primary:Bacteria;Phylum:Bacillota;Class:Clostridia;Order:NA;Family:NA;Genus:NA;Species:NA;	0	0	1	0	0	0	1	0	0	0	0	0	0	1	0	0	0	0	0	0	1	0	0	0	1	0	0	0	0	0	0	0	0	0	0	0	0	0	0	1
OTU904	Primary:Bacteria;Phylum:Bacillota;Class:Clostridia;Order:Eubacteriales;Family:Oscillospiraceae;Genus:NA;Species:NA;	19	27	30	12	26	6	22	49	38	15	41	30	35	66	27	59	6	46	74	11	2	12	9	10	1	3	29	9	0	34	45	39	40	26	16	63	108	22	8	52
OTU909	Primary:Bacteria;Phylum:Bacillota;Class:Clostridia;Order:Eubacteriales;Family:NA;Genus:NA;Species:NA;	3	149	14	30	72	64	239	1	6	166	6	4	81	19	3	23	75	12	0	1	10	29	14	11	35	22	196	3	24	16	294	12	13	51	2	35	13	38	0	17
OTU91	Primary:Bacteria;Phylum:Bacteroidota;Class:Bacteroidia;Order:Bacteroidales;Family:Bacteroidaceae;Genus:Bacteroides;Species:NA;	139	0	0	19	0	0	1	1	23	3	0	206	54	1	1111	1	6	4	6	0	0	0	271	8	2	172	15	0	1	5	3	3	1	1	263	1	7	0	11	2
OTU911	Primary:Bacteria;Phylum:Bacillota;Class:Clostridia;Order:Eubacteriales;Family:Oscillospiraceae;Genus:NA;Species:NA;	49	55	293	433	101	130	253	45	89	35	288	136	129	270	173	134	58	211	25	6	136	315	143	299	135	105	149	10	203	83	190	251	151	125	30	136	486	709	22	193
OTU914	Primary:Bacteria;Phylum:Bacillota;Class:Clostridia;Order:Eubacteriales;Family:Christensenellaceae;Genus:NA;Species:NA;	1	0	1	0	0	0	0	0	0	0	2	0	0	0	0	0	0	2	0	0	0	1	0	0	0	0	0	0	1	0	0	0	0	0	0	0	0	0	0	1
OTU915	Primary:Bacteria;Phylum:Bacillota;Class:Clostridia;Order:Eubacteriales;Family:Lachnospiraceae;Genus:NA;Species:NA;	39	19	34	7	33	10	34	28	136	57	69	41	106	43	20	32	52	10	3	3	69	7	18	62	12	47	41	4	29	20	178	55	53	39	27	57	154	116	7	119
OTU92	Primary:Bacteria;Phylum:Bacillota;Class:Clostridia;Order:Eubacteriales;Family:Lachnospiraceae;Genus:NA;Species:NA;	25	79	81	11	63	9	58	50	86	37	93	147	167	128	66	31	37	164	64	17	23	45	102	16	7	222	79	20	114	20	195	45	83	38	39	16	182	60	26	105
OTU922	Primary:Bacteria;Phylum:Bacillota;Class:Clostridia;Order:Eubacteriales;Family:Lachnospiraceae;Genus:NA;Species:NA;	86	120	158	227	166	119	245	182	361	243	295	244	385	622	380	107	364	219	916	153	538	140	213	134	170	183	544	152	122	214	295	136	423	214	22	167	137	332	17	202
OTU924	Primary:Bacteria;Phylum:Bacillota;Class:Clostridia;Order:Eubacteriales;Family:NA;Genus:NA;Species:NA;	100	51	68	500	53	318	96	34	49	139	157	40	43	110	13	26	82	103	11	1	98	278	341	230	235	406	82	38	87	70	74	147	176	221	45	39	41	82	18	475
OTU929	Primary:Bacteria;Phylum:Bacillota;Class:Clostridia;Order:Eubacteriales;Family:Oscillospiraceae;Genus:Fumia;Species:Fumia_xinanensis;	0	0	0	0	0	0	0	0	0	0	0	0	0	0	0	0	0	0	0	0	0	0	0	0	0	0	0	0	0	0	0	0	0	0	0	0	0	0	0	0
OTU93	Primary:Bacteria;Phylum:Bacteroidota;Class:Bacteroidia;Order:Bacteroidales;Family:Bacteroidaceae;Genus:Phocaeicola;Species:Phocaeicola_salanitronis;	289	194	1	8	470	0	6	36	13	8	6	52	70	0	361	3	1	30	3	313	1	28	328	14	6	21	10	625	27	2	5	1	4	4	68	2	19	1	123	1
OTU930	Primary:Bacteria;Phylum:Bacillota;Class:Bacilli;Order:Lactobacillales;Family:Enterococcaceae;Genus:Enterococcus;Species:Enterococcus_faecalis;	1	0	1	0	0	0	0	0	0	0	0	0	0	0	0	2	1	0	0	0	0	0	0	2	2	0	0	0	0	1	3	2	0	0	0	1	0	2	8	0
OTU936	Primary:Bacteria;Phylum:Bacillota;Class:Clostridia;Order:Eubacteriales;Family:Oscillospiraceae;Genus:Solibaculum;Species:Solibaculum_mannosilyticum;	0	1	2	1	1	1	2	0	0	1	0	0	0	0	1	0	0	2	0	1	1	0	0	0	0	0	0	0	0	1	0	0	0	0	0	0	0	0	1	0
OTU939	Primary:Bacteria;Phylum:Bacillota;Class:Clostridia;Order:Eubacteriales;Family:Lachnospiraceae;Genus:NA;Species:NA;	18	20	29	61	59	61	58	62	53	73	52	60	84	75	49	33	61	43	93	47	107	56	49	49	25	60	73	11	73	32	61	20	39	59	5	47	61	89	10	23
OTU94	Primary:Bacteria;Phylum:Bacillota;Class:Clostridia;Order:Eubacteriales;Family:Lachnospiraceae;Genus:Coprococcus;Species:Coprococcus_comes;	70	75	45	37	128	18	33	93	34	41	49	5	23	254	100	360	93	58	26	16	7	33	75	18	7	51	54	47	15	36	27	15	37	9	3	69	31	57	1	50
OTU948	Primary:Bacteria;Phylum:Bacillota;Class:Clostridia;Order:Eubacteriales;Family:Lachnospiraceae;Genus:NA;Species:NA;	13	5	5	4	4	6	4	5	18	8	10	39	7	17	6	13	6	2	14	3	29	18	3	23	18	4	20	2	8	10	15	11	57	21	4	54	42	46	2	36
OTU95	Primary:Bacteria;Phylum:Bacillota;Class:NA;Order:NA;Family:NA;Genus:NA;Species:NA;	255	11	0	55	4	14	28	15	12	30	4	8	2	0	0	7	0	7	1	0	22	27	14	10	24	5	424	5	4	4	6	36	20	23	118	41	28	138	16	2
OTU952	Primary:Bacteria;Phylum:Bacillota;Class:Clostridia;Order:Eubacteriales;Family:NA;Genus:NA;Species:NA;	0	0	0	0	0	0	0	1	0	0	0	1	0	0	2	0	0	0	0	1	0	0	1	0	0	0	0	0	0	0	0	0	0	0	0	0	0	0	1	0
OTU953	Primary:Bacteria;Phylum:NA;Class:NA;Order:NA;Family:NA;Genus:NA;Species:NA;	0	0	0	0	0	1	0	0	0	2	0	2	0	0	0	0	0	0	0	0	0	0	1	0	0	0	0	1	0	0	0	0	0	0	0	0	1	0	0	0
OTU954	Primary:Bacteria;Phylum:Bacillota;Class:Clostridia;Order:Eubacteriales;Family:Lachnospiraceae;Genus:NA;Species:NA;	4	3	2	4	5	5	11	2	0	2	1	4	1	0	10	0	5	1	0	8	3	0	0	1	0	0	0	0	1	0	0	0	0	0	0	0	0	0	1	0
OTU956	Primary:Bacteria;Phylum:Bacillota;Class:Erysipelotrichia;Order:Erysipelotrichales;Family:Erysipelotrichaceae;Genus:Holdemanella;Species:Holdemanella_porci;	0	1	0	0	0	0	1	0	0	0	0	0	0	0	0	0	0	2	1	0	1	0	0	0	0	0	0	0	0	0	0	1	0	0	0	0	0	0	0	0
OTU957	Primary:Bacteria;Phylum:Bacillota;Class:Clostridia;Order:Eubacteriales;Family:Lachnospiraceae;Genus:Robinsoniella;Species:Robinsoniella_peoriensis;	24	19	27	52	18	55	56	18	60	29	48	72	19	28	7	15	49	52	23	8	24	85	29	46	27	57	46	11	101	28	30	27	47	57	3	47	37	68	5	107
OTU958	Primary:Bacteria;Phylum:NA;Class:NA;Order:NA;Family:NA;Genus:NA;Species:NA;	0	0	0	0	0	0	0	0	0	0	0	0	0	0	0	0	0	0	0	0	0	0	0	0	0	0	0	0	0	0	0	0	0	0	0	0	0	0	0	0
OTU959	Primary:Bacteria;Phylum:Bacillota;Class:Clostridia;Order:Eubacteriales;Family:NA;Genus:NA;Species:NA;	3	1	0	2	4	1	0	3	1	3	0	0	0	1	1	0	1	0	0	6	0	0	7	0	0	1	0	4	0	0	1	2	2	0	8	0	0	0	3	0
OTU96	Primary:Bacteria;Phylum:Bacteroidota;Class:Bacteroidia;Order:Bacteroidales;Family:Rikenellaceae;Genus:Alistipes;Species:Alistipes_shahii;	13	141	0	0	199	2	18	294	51	46	2	0	66	0	142	0	5	1	1	45	0	5	29	2	5	1	1	294	4	0	2	0	1	2	6	1	1	0	280	2
OTU961	Primary:Bacteria;Phylum:Bacteroidota;Class:Bacteroidia;Order:Bacteroidales;Family:Bacteroidaceae;Genus:NA;Species:NA;	0	0	0	0	0	0	4	0	0	0	1	3	0	0	0	0	0	0	0	0	0	0	2	13	0	0	0	0	0	4	0	1	0	1	1	0	1	0	0	0
OTU962	Primary:Bacteria;Phylum:Bacillota;Class:Clostridia;Order:Eubacteriales;Family:Oscillospiraceae;Genus:Fournierella;Species:Fournierella_massiliensis;	2	0	2	3	0	3	6	1	1	6	2	0	0	0	3	0	3	0	10	0	5	2	1	5	8	2	2	0	0	6	0	2	2	12	0	1	1	0	0	0
OTU965	Primary:Bacteria;Phylum:Bacillota;Class:Clostridia;Order:Eubacteriales;Family:Lachnospiraceae;Genus:Catenibacillus;Species:Catenibacillus_scindens;	1	1	1	0	0	0	0	0	0	0	0	1	0	0	2	1	0	1	0	1	1	0	0	1	0	0	1	0	0	1	1	0	0	0	0	0	0	0	1	1
OTU966	Primary:Bacteria;Phylum:Bacillota;Class:Clostridia;Order:Eubacteriales;Family:NA;Genus:NA;Species:NA;	3	5	0	0	1	0	0	1	0	0	0	0	0	0	2	0	0	0	0	0	0	0	1	0	0	0	0	1	0	0	0	0	0	0	5	0	0	0	0	0
OTU97	Primary:Bacteria;Phylum:Bacillota;Class:Clostridia;Order:Eubacteriales;Family:Oscillospiraceae;Genus:Flintibacter;Species:Flintibacter_hominis;	102	269	52	2	149	7	15	212	35	24	3	18	83	60	143	94	3	20	64	197	0	12	68	0	1	20	6	93	10	5	7	6	14	0	59	10	68	164	82	63
OTU970	Primary:Bacteria;Phylum:Bacillota;Class:NA;Order:NA;Family:NA;Genus:NA;Species:NA;	0	1	1	0	0	1	2	1	0	0	0	0	0	0	0	0	0	1	0	1	0	0	0	0	0	0	1	0	0	0	0	0	0	0	0	0	0	0	0	1
OTU973	Primary:Bacteria;Phylum:Bacillota;Class:Clostridia;Order:Eubacteriales;Family:Lachnospiraceae;Genus:NA;Species:NA;	0	3	0	4	0	1	0	0	0	2	0	2	0	0	2	0	0	0	1	1	0	1	0	0	0	0	0	0	0	0	0	0	0	0	0	0	0	1	0	0
OTU979	Primary:Bacteria;Phylum:Bacillota;Class:Clostridia;Order:Eubacteriales;Family:Lachnospiraceae;Genus:Roseburia;Species:Roseburia_amylophila;	3	2	1	2	0	4	2	0	1	2	2	1	1	0	0	1	1	1	0	2	2	0	0	0	0	0	1	0	0	1	0	1	0	0	0	0	0	0	0	0
OTU98	Primary:Bacteria;Phylum:Bacillota;Class:Clostridia;Order:Eubacteriales;Family:Eubacteriales;Genus:NA;Species:NA;	27	13	26	42	26	23	35	18	21	23	74	37	46	23	15	42	29	17	13	9	60	49	24	67	64	33	55	4	8	17	44	18	16	39	1	12	23	18	4	30
OTU981	Primary:Bacteria;Phylum:Bacillota;Class:Clostridia;Order:Eubacteriales;Family:Oscillospiraceae;Genus:NA;Species:NA;	0	1	0	0	0	1	1	2	0	0	1	0	0	1	0	1	0	1	0	0	1	0	1	0	0	0	0	0	0	3	1	0	1	0	0	3	1	0	0	0
OTU986	Primary:Bacteria;Phylum:Bacillota;Class:Clostridia;Order:Eubacteriales;Family:Oscillospiraceae;Genus:Vescimonas;Species:Vescimonas_fastidiosa;	0	0	0	0	2	0	0	0	0	0	0	0	0	0	1	0	0	0	0	0	0	0	0	0	0	0	0	1	0	0	0	1	0	0	0	0	0	0	0	0
OTU99	Primary:Bacteria;Phylum:Bacillota;Class:Clostridia;Order:Eubacteriales;Family:Oscillospiraceae;Genus:NA;Species:NA;	117	415	28	3	180	11	7	125	27	21	49	33	56	12	16	72	7	49	7	17	1	1	60	2	2	4	9	124	2	6	15	17	11	11	143	14	107	12	176	37
OTU994	Primary:Bacteria;Phylum:Bacteroidota;Class:Bacteroidia;Order:Bacteroidales;Family:Odoribacteraceae;Genus:Butyricimonas;Species:Butyricimonas_virosa;	1	1	0	0	1	0	0	0	0	0	0	0	1	0	2	0	1	0	0	1	0	0	1	0	0	0	0	0	0	0	0	0	0	0	2	0	0	0	0	0
