# Supplementary material for: Akkermansia muciniphila Enhances Resistance to Infectious Bronchitis Virus in Chickens Through γ-Aminobutyric Acid-Mediated Anti-Inflammatory Pathways
Source: Research Square preprint supplement (doi:10.21203/rs.3.rs-6786224/v1), 2025-06-25
Supplement: Supplementary file 2 [file 2e4eef7116f62787178eb58b.xlsx]

## Sheet: Figure6DiffMeta
Table S11. Differentially expressed metabolites in Akkermansia muciniphila-treated and IBV-infected chickens compared to the IBV-infected group.
Metabolite	FC	Log2FC	Q-value	Log10(Q-value)	VIP
(-)-threo-Iso(homo)2-citrate	0.75252	-0.41019	0.055359	1.2568	0.884062
(2-Amino-1-hydroxyethyl)phosphonate	2.6081	1.383	0.0013803	2.86	1.36969
(24R,24(1)R)-Fucosterol epoxide	2.9796	1.5751	0.0004546	3.3424	1.4341
(2R,3R)-3-Methylornithine	2.1459	1.1016	9.8512e-05	4.0065	1.49559
(2R,3S)-2,3-Dimethylmalate	0.73839	-0.43754	0.27193	0.56554	0.545508
(2R,5S)-2,5-Diaminohexanoate	2.1459	1.1016	9.8512e-05	4.0065	1.49559
(2S,3R)-2,3-Dihydroxy-5-oxohexanedioate	4.0096	2.0035	0.011577	1.9364	1.15926
(2S,3R)-3-Hydroxybutane-1,2,3-tricarboxylate	2.0831	1.0587	0.42696	0.36961	0.367669
(2S,4S)-4-Hydroxy-2,3,4,5-tetrahydrodipicolinate	0.85769	-0.22147	0.033802	1.4711	0.964186
(2Z,4S,5R)-2-Amino-4,5,6-trihydroxyhex-2-enoate	0.50489	-0.98595	0.0010193	2.9917	1.33828
(3R)-beta-Leucine	1.5777	0.65782	8.1434e-05	4.0892	1.50641
(4S)-4,6-Dihydroxy-2,5-dioxohexanoate	1.1523	0.20457	0.82149	0.0854	0.136272
(4S,5R)-4,5,6-Trihydroxy-2-iminohexanoate	0.50489	-0.98595	0.0010193	2.9917	1.33828
(5-L-Glutamyl)-L-glutamate	0.57988	-0.78619	6.9611e-06	5.1573	1.61264
(6Z,9Z,12Z)-Octadecatrienoic acid	1.1705	0.22711	0.35114	0.45452	0.526304
(9Z)-Hexadecenoic acid	0.46062	-1.1184	0.00011071	3.9558	1.48749
(R)-(Homo)2-citrate	0.75252	-0.41019	0.055359	1.2568	0.884062
(R)-2-Ethylmalate	0.73839	-0.43754	0.27193	0.56554	0.545508
(R)-2-Hydroxybutane-1,2,4-tricarboxylate	2.0831	1.0587	0.42696	0.36961	0.367669
(R)-2,3-Dihydroxy-3-methylbutanoate	1.0194	0.027658	0.8441	0.073607	0.0996732
(R)-3,3-Dimethylmalate	0.73839	-0.43754	0.27193	0.56554	0.545508
(R)-4'-Phosphopantothenoyl-L-cysteine	0.66349	-0.59185	0.050195	1.2993	0.921901
(R)-4-Dehydropantoate	1.126	0.17118	0.33938	0.46932	0.490557
(R)-Lactaldehyde	0.77356	-0.37041	0.020763	1.6827	1.07499
(R)-Malate	1.4001	0.48554	0.0030119	2.5212	1.28373
(R)-S-Lactoylglutathione	1.3926	0.47779	0.1168	0.93257	0.741603
(S)-1-Pyrroline-5-carboxylate	0.57627	-0.79519	0.044901	1.3477	0.934352
(S)-2-Aminobutanoate	0.93066	-0.10368	0.55766	0.25363	0.329018
(S)-4-Amino-5-oxopentanoate	0.87164	-0.1982	0.38648	0.41287	0.49012
(S)-Malate	1.3047	0.38376	0.094168	1.0261	0.818693
1-(5'-Phosphoribosyl)-5-amino-4-imidazolecarboxamide	1.1355	0.18335	0.076521	1.1162	0.822826
1-(5'-Phosphoribosyl)-5-formamido-4-imidazolecarboxamide	0.96307	-0.054289	0.36056	0.44302	0.499452
1-Aminocyclopropane-1-carboxylate	0.56916	-0.81309	0.00010251	3.9892	1.5057
1-Methylguanosine	1.505	0.58974	0.00035569	3.4489	1.45967
1-Methylinosine	1.4181	0.50401	0.0018938	2.7227	1.29649
1-Methylpseudouridine	1.6598	0.73103	0.028831	1.5401	1.02063
1-Myristoyl-sn-glycero-3-phosphocholine (LPC(14:0/0:0))	0.45579	-1.1336	0.00011737	3.9304	1.47984
1-O-Hexadecyl-sn-glycero-3-phosphocholine (LPC(O-16:0/0:0))	1.5444	0.627	0.089055	1.0503	0.821091
1-Oleoyl-sn-glycerol 3-phosphate	0.81139	-0.30153	0.30264	0.51907	0.553866
12-Methyltridecanoic acid	0.56961	-0.81195	7.6465e-08	7.1165	1.71573
12(S)-HHTrE	0.81033	-0.30342	0.16419	0.78465	0.696114
13(S)-HODE	0.54557	-0.87415	0.00055061	3.2592	1.39734
16-Hydroxypalmitic acid	1.4776	0.5633	0.0027036	2.5681	1.27591
2'-Deoxyuridine	4.422	2.1447	2.452e-06	5.6105	1.64329
2'-O-Methylguanosine	1.505	0.58974	0.00035569	3.4489	1.45967
2'-O-Methylinosine	1.1442	0.19437	0.16273	0.78852	0.724044
2'-O-Methyluridine	1.0379	0.053687	0.69662	0.15701	0.234681
2-(Acetamidomethylene)succinate	0.85769	-0.22147	0.033802	1.4711	0.964186
2-(alpha-D-Galactosyl)-sn-glycerol 3-phosphate	0.65225	-0.61651	0.028247	1.549	1.02555
2-(alpha-D-Glucosyl)-sn-glycerol 3-phosphate	0.65225	-0.61651	0.028247	1.549	1.02555
2-(alpha-D-Mannosyl)-3-phosphoglycerate	0.80228	-0.31782	0.078336	1.106	0.846262
2-(alpha-Hydroxypropyl)thiamine diphosphate	0.92838	-0.10721	0.1493	0.82594	0.71682
2-alpha-D-Glucosyl-D-glucose	1.1242	0.16886	0.1812	0.74184	0.676428
2-Amino-4-oxopentanoic acid	0.87164	-0.1982	0.38648	0.41287	0.49012
2-Amino-5-oxohexanoate	1.7129	0.77646	0.0064082	2.1933	1.21661
2-Aminoadipic acid	1.5268	0.61054	3.3606e-06	5.4736	1.64271
2-Aminobut-2-enoate	0.56916	-0.81309	0.00010251	3.9892	1.5057
2-Dehydro-3-deoxy-6-phospho-D-galactonate	0.88531	-0.17575	0.82575	0.083154	0.115701
2-Dehydro-3-deoxy-6-phospho-D-gluconate	0.88531	-0.17575	0.82575	0.083154	0.115701
2-Dehydro-3-deoxy-D-fuconate	0.73839	-0.43754	0.27193	0.56554	0.545508
2-Dehydro-3-deoxy-D-glucarate	4.0096	2.0035	0.011577	1.9364	1.15926
2-Dehydro-3-deoxy-L-fuconate	0.73839	-0.43754	0.27193	0.56554	0.545508
2-Dehydro-3-deoxy-L-rhamnonate	0.73839	-0.43754	0.27193	0.56554	0.545508
2-Dehydro-L-idonate	0.93863	-0.091367	0.65082	0.18654	0.253889
2-Deoxy-5-keto-D-gluconic acid 6-phosphate	0.88531	-0.17575	0.82575	0.083154	0.115701
2-Hydroxy-2-methylbutyric acid	1.0974	0.13414	0.44841	0.34832	0.385804
2-Hydroxy-3-methylbutyric acid	1.0974	0.13414	0.44841	0.34832	0.385804
2-Hydroxy-5-methyl-cis,cis-muconate	0.5496	-0.86355	0.047673	1.3217	0.94605
2-Hydroxy-6-oxo-6-phenylhexa-2,4-dienoate	0.83149	-0.26623	0.27663	0.5581	0.575172
2-Hydroxyadipate	0.73839	-0.43754	0.27193	0.56554	0.545508
2-Hydroxyhepta-2,4-dienedioate	0.5496	-0.86355	0.047673	1.3217	0.94605
2-Hydroxymuconate semialdehyde	1.2629	0.33676	0.21663	0.66428	0.662069
2-Hydroxypalmitic acid	1.4776	0.5633	0.0027036	2.5681	1.27591
2-Hydroxystearic acid	1.3719	0.45619	0.024956	1.6028	1.04633
2-Keto-D-gluconic acid	0.93863	-0.091367	0.65082	0.18654	0.253889
2-Ketobutyric acid	2.104	1.0731	0.00027389	3.5624	1.45237
2-Ketocaproic acid	1.6068	0.68415	0.00064227	3.1923	1.39638
2-Methylguanosine	1.505	0.58974	0.00035569	3.4489	1.45967
2-Methylmaleate	0.49866	-1.0039	0.0027036	2.5681	1.28043
2-Methylpropanamine	0.76944	-0.37812	0.043137	1.3651	0.946567
2-Methylserine	0.5862	-0.77052	0.11479	0.94009	0.798097
2-O-(6-Phospho-alpha-mannosyl)-D-glycerate	0.80228	-0.31782	0.078336	1.106	0.846262
2-O-(alpha-D-Glucopyranosyl)-3-phospho-D-glycerate	0.80228	-0.31782	0.078336	1.106	0.846262
2-O-(alpha-D-Glucopyranosyl)-D-glycerate	1.4807	0.56627	0.00079132	3.1016	1.37539
2-O-(alpha-D-Mannosyl)-D-glycerate	1.5195	0.60362	0.38648	0.41287	0.463544
2-O-[2-O-(alpha-D-Mannopyranosyl)-alpha-D-glucopyranosyl]-3-phospho-D-glycerate	0.72465	-0.46465	0.076521	1.1162	0.839383
2-Oxo-5-methyl-cis-muconate	1.335	0.4168	0.0015506	2.8095	1.31839
2-Oxoadipate	0.43566	-1.1987	1.1347e-07	6.9451	1.70875
2-Oxoglutaramate	1.0792	0.11001	0.75891	0.11981	0.177763
2-Oxoglutarate	1.6756	0.74464	2.5996e-05	4.5851	1.55596
2-Oxohept-3-enedioate	0.5496	-0.86355	0.047673	1.3217	0.94605
2-Piperidone	1.1753	0.23309	0.024956	1.6028	1.01743
2-Propylmalate	0.8464	-0.24059	0.38648	0.41287	0.494838
2,3-Dihydro-2-S-glutathionyl-3-hydroxy bromobenzene	1.1789	0.23748	0.050576	1.2961	0.931649
2,3-Dihydroxy-3-methylbutanoate	1.0194	0.027658	0.8441	0.073607	0.0996732
2,4-Dihydroxybutanoic acid	2.1827	1.1261	2.7886e-05	4.5546	1.56029
2,4-Dihydroxyhept-2-enedioate	1.7377	0.79718	0.052638	1.2787	0.938439
2,4-Diketo-3-deoxy-L-fuconate	0.43566	-1.1987	1.1347e-07	6.9451	1.70875
2,5-Diamino-6-(5-phospho-D-ribitylamino)pyrimidin-4(3H)-one	1.1646	0.21979	0.36146	0.44194	0.473123
2,5-Didehydro-D-gluconate	4.0096	2.0035	0.011577	1.9364	1.15926
2,5-Dioxopentanoate	0.88417	-0.1776	0.5749	0.24041	0.285855
3'-O-Methylguanosine	1.505	0.58974	0.00035569	3.4489	1.45967
3'-O-Methylinosine	1.4181	0.50401	0.0018938	2.7227	1.29649
3'-O-Methyluridine	1.0379	0.053687	0.69662	0.15701	0.234681
3-(Pyrazol-1-yl)-L-alanine	0.70615	-0.50196	0.055359	1.2568	0.924354
3-Aminopentanedioate	0.96962	-0.044503	0.75518	0.12195	0.16453
3-Aminopiperidine-2,6-dione	1.5944	0.67304	0.00054526	3.2634	1.39688
3-beta-D-Galactosyl-sn-glycerol	0.26327	-1.9254	3.6537e-05	4.4373	1.55197
3-Chloro-D-alanine	0.64436	-0.63407	0.0081656	2.088	1.17004
3-Chloro-L-alanine	0.64436	-0.63407	0.0081656	2.088	1.17004
3-Cyano-L-alanine	1.456	0.542	0.18425	0.7346	0.686638
3-Dehydro-L-gulonate	1.0188	0.026871	0.90739	0.042208	0.0727522
3-Deoxy-D-manno-octulosonate	1.0625	0.087499	0.71445	0.14603	0.199473
3-Hydroxy-L-kynurenine	0.88203	-0.1811	0.45716	0.33993	0.424205
3-Hydroxy-N6,N6,N6-trimethyl-L-lysine	0.95634	-0.064401	0.90739	0.042208	0.0210526
3-Hydroxypropanal	0.77356	-0.37041	0.020763	1.6827	1.07499
3-Methoxy-4-hydroxyphenylglycol sulfate	1.1715	0.22837	0.66462	0.17743	0.274254
3-Methyl-2-oxovaleric acid	1.6068	0.68415	0.00064227	3.1923	1.39638
3-methylcytidine	0.72871	-0.45658	0.36056	0.44302	0.499099
3-Methyluridine	1.0379	0.053687	0.69662	0.15701	0.234681
3-Oxopropanoate	1.5069	0.59161	0.013852	1.8585	1.08152
3-Phenyllactic acid	0.50404	-0.98838	0.025532	1.5929	1.02181
3-Phenylpropanoic acid	0.52695	-0.92427	0.034345	1.4641	0.987606
3-Pyridylacetic acid	1.3029	0.38174	0.25169	0.59913	0.598806
3,4-Dihydro-3-hydroxy-4-S-glutathionyl bromobenzene	1.1789	0.23748	0.050576	1.2961	0.931649
3,4-Dihydroxy-L-phenylalanine	1.1188	0.1619	0.88665	0.052247	0.0840835
3,4-Dimethylbenzaldehyde	0.95478	-0.066766	0.94807	0.023161	0.0338869
4-(4-Deoxy-alpha-D-gluc-4-enuronosyl)-D-galacturonate	1.1654	0.22079	0.6111	0.21389	0.283392
4-(Methylamino)butanoic acid	1.1208	0.16452	0.25596	0.59182	0.604249
4-Aminobutanoate	0.82846	-0.2715	0.10777	0.96751	0.776107
4-Aminobutyric acid (GABA)	8.8394	3.144	4.1712e-12	11.38	1.81581
4-Chromanone	1.2937	0.37149	0.00038195	3.418	1.43255
4-Cresol sulfate	11.152	3.4792	0.55875	0.25278	0.277735
4-Glutathionyl cyclophosphamide	1.0411	0.058048	0.60497	0.21827	0.287011
4-Guanidinobutanal	0.94964	-0.074555	0.74752	0.12638	0.203922
4-Hydroxy-2-oxo-heptanedioate	1.7377	0.79718	0.052638	1.2787	0.938439
4-Hydroxy-2-oxohexanoic acid	1.126	0.17118	0.33938	0.46932	0.490557
4-Hydroxy-2-oxopentanoate	0.98427	-0.02288	0.81224	0.090314	0.112716
4-Hydroxy-4-methylglutamate	0.8056	-0.31186	0.070074	1.1544	0.890334
4-Hydroxybutanoic acid	4.0542	2.0194	0.007232	2.1407	1.1851
4-Hydroxyisoleucine	0.6711	-0.57541	0.028997	1.5376	0.994991
4-Hydroxyproline	1.1332	0.18042	0.59617	0.22463	0.320893
4-Imidazolone-5-propanoate	1.068	0.094873	0.87062	0.060171	0.126239
4-Methylaminobutyrate	0.7627	-0.39082	0.045451	1.3425	0.957547
4-Methylquinolin-2-ol	0.78824	-0.3433	0.055359	1.2568	0.90837
4-O-beta-D-Glucopyranosyl-D-mannose	1.1242	0.16886	0.1812	0.74184	0.676428
4-O-beta-D-Mannopyranosyl-D-glucopyranose	1.1242	0.16886	0.1812	0.74184	0.676428
4-O-Methyl-myo-inositol	5.9899	2.5825	8.6528e-07	6.0628	1.66404
4-Oxoglutaramate	1.0792	0.11001	0.75891	0.11981	0.177763
4,5-Dioxopentanoate	0.88417	-0.1776	0.5749	0.24041	0.285855
5'-Methylthioadenosine	1.119	0.1622	0.52916	0.27641	0.358736
5-Amino-6-(5'-phosphoribosylamino)uracil	0.43601	-1.1976	0.0061367	2.2121	1.2032
5-Aminolevulinic acid	0.92733	-0.10884	0.48154	0.31737	0.416272
5-Dehydro-4-deoxy-D-glucarate	4.0096	2.0035	0.011577	1.9364	1.15926
5-Dehydro-D-gluconate	0.93863	-0.091367	0.65082	0.18654	0.253889
5-Hydroxy-2,4-dioxopentanoate	1.6756	0.74464	2.5996e-05	4.5851	1.55596
5-Hydroxy-L-tryptophan	1.2496	0.32144	0.11479	0.94009	0.775151
5-Methylcytosine	0.71341	-0.48719	0.021175	1.6742	1.03762
5-Methylthio-D-ribose	1.1251	0.17005	0.22017	0.65725	0.599511
5-Oxo-D-proline	1.4038	0.48931	0.086613	1.0624	0.833459
5-Oxoproline	1.4038	0.48931	0.086613	1.0624	0.833459
5Z,8Z,11Z-Eicosatrienoic acid	0.80973	-0.30449	0.078814	1.1034	0.848115
6-Hydroxynorleucine	0.6711	-0.57541	0.028997	1.5376	0.994991
6-Phospho-D-gluconate	1.1777	0.23595	0.34235	0.46553	0.515507
6-Sialyllactose	1.3263	0.40737	0.00060009	3.2218	1.40114
6-Tuliposide B	0.79779	-0.32592	0.74752	0.12638	0.178898
7-Hydroxy-3-oxo-cholest-4-en-26-oic acid	0.52864	-0.91964	0.020038	1.6981	1.0941
7-Methylguanine	1.432	0.51803	2.892e-07	6.5388	1.69704
7,8-Dihydroneopterin 2'-phosphate	1.2911	0.36858	0.027066	1.5676	1.03693
7,8-Dihydroneopterin 2',3'-cyclic phosphate	0.91498	-0.12819	0.70723	0.15044	0.246753
9-Oxooctadecanoic acid	0.74896	-0.41705	0.052077	1.2834	0.926792
Abrine	1.3075	0.38681	0.076521	1.1162	0.866471
Acetylpyruvate	0.49866	-1.0039	0.0027036	2.5681	1.28043
Adenine	0.87699	-0.18937	0.31794	0.49765	0.504287
Adenosine	0.61552	-0.70012	0.094676	1.0238	0.778888
Adenosine 3',5'-bisphosphate	1.1221	0.16619	0.28212	0.54957	0.550136
ADP	1.1221	0.16619	0.28212	0.54957	0.550136
Alanopine	0.56916	-0.81309	0.00010251	3.9892	1.5057
Allantoin	1.1851	0.24495	0.72725	0.13832	0.210678
Allose	0.55368	-0.85288	0.049856	1.3023	0.957651
alpha-D-Galactosyl-(1,1')-sn-glycerol 3-phosphate	0.65225	-0.61651	0.028247	1.549	1.02555
alpha-Isopropylmalate	0.965	-0.051398	0.88491	0.053102	0.0315968
alpha-Ketoisovaleric acid	1.4872	0.57263	0.0090166	2.045	1.18116
Amino acid(Arg-)	0.92974	-0.1051	0.66462	0.17743	0.271468
Aminoacetaldehyde	0.5862	-0.77052	0.11479	0.94009	0.798097
Arabitol	0.36716	-1.4455	6.2073e-10	9.2071	1.77883
Arachidonic acid (AA)	1.2172	0.28353	0.12257	0.9116	0.790973
Arginine	0.61517	-0.70095	0.12049	0.91906	0.760819
Ascorbic acid	0.83834	-0.25438	0.33925	0.46948	0.505752
Aspartate	1.03	0.042592	0.8648	0.063085	0.113361
Aspirin	1.0165	0.02356	0.98956	0.0045563	0.00727724
beta-1,2-Mannobiose	1.1242	0.16886	0.1812	0.74184	0.676428
beta-Alanine	1.0473	0.066723	0.66907	0.17453	0.243078
beta-Alanopine	0.49102	-1.0262	0.0030119	2.5212	1.25898
beta-Alanyl-N(pi)-methyl-L-histidine	1.3251	0.40607	0.0030119	2.5212	1.2871
beta-Citryl-L-glutamate	1.7312	0.79174	0.00098288	3.0075	1.36641
beta-D-4-Deoxy-Delta4-GlcA-(1->4)-beta-D-Glc-(1->4)-alpha-L-Rha-(1->3)-D-Glc	0.81275	-0.29912	0.09493	1.0226	0.790237
beta-D-Glc-(1->4)-alpha-L-Rha-(1->3)-D-Glc	1.1291	0.1752	0.52309	0.28142	0.350862
beta-Nitropropanoate	1.8556	0.89192	0.0084718	2.072	1.15828
Betaine	0.84592	-0.24141	0.39327	0.4053	0.47489
Betaine aldehyde	2.5497	1.3503	0.55228	0.25784	0.314567
Bis(5'-adenosyl) pentaphosphate	0.96546	-0.050707	0.84382	0.073749	0.115067
Bis(glutathionyl)spermine	1.6157	0.69212	0.028247	1.549	1.03426
Bis(glutathionyl)spermine disulfide	1.2184	0.28495	0.1757	0.75522	0.711799
Butyrylcarnitine (Car(4:0))	1.9294	0.94815	5.1813e-05	4.2856	1.54182
Caffeic acid	0.73306	-0.448	0.16889	0.7724	0.692824
Calligonine	0.26638	-1.9084	5.4378e-09	8.2646	1.75773
Car(18:1)	1.1665	0.22218	0.36214	0.44113	0.501725
Carnosine	1.4369	0.52301	0.0071759	2.1441	1.17975
Cellobiose	1.1242	0.16886	0.1812	0.74184	0.676428
Cephalosporin C	0.92987	-0.1049	0.67249	0.17231	0.247754
Cholesteryl sulfate	1.4846	0.57012	0.14166	0.84876	0.752576
Choline	1.0975	0.13417	0.077449	1.111	0.886573
cis-3-(3-Carboxyethenyl)-3,5-cyclohexadiene-1,2-diol	1.4023	0.48775	0.025549	1.5926	1.04872
cis-4-Hydroxy-D-proline	0.87164	-0.1982	0.38648	0.41287	0.49012
cis-8,11,14-Eicosatrienoic acid	0.80973	-0.30449	0.078814	1.1034	0.848115
cis-Aconitate	2.7286	1.4482	0.15587	0.80723	0.732464
cis-Aconitic acid	0.923	-0.11559	0.40975	0.38748	0.408299
cis,cis-2,4-Dihydroxy-5-methyl-6-oxo-2,4-hexadienoate	0.5496	-0.86355	0.047673	1.3217	0.94605
Citrate	4.0096	2.0035	0.011577	1.9364	1.15926
CMP-2-aminoethylphosphonate	1.3241	0.40501	0.0072321	2.1407	1.18707
CMP-N-acetylneuraminate	1.1965	0.25884	0.36056	0.44302	0.539036
Creatine	2.0933	1.0658	0.13778	0.86082	0.74802
Creatinine	1.5037	0.58855	0.00069017	3.161	1.39337
Crepenynate	1.1705	0.22711	0.35114	0.45452	0.526304
Cycasin	0.758	-0.39972	0.16594	0.78004	0.688888
Cyclamic acid	0.98401	-0.023261	0.67821	0.16863	0.261002
Cystathionine	0.57662	-0.79431	5.5808e-05	4.2533	1.50304
Cystine	0.63553	-0.65398	9.8318e-06	5.0074	1.60039
Cystine-glutathione	0.98996	-0.01456	0.87306	0.058955	0.0361685
Cytidine	4.5554	2.1876	0.00041802	3.3788	1.43958
Cytosine	2.19	1.1309	0.028761	1.5412	1.04255
D-2,3-Diketo 4-deoxy-epi-inositol	0.43566	-1.1987	1.1347e-07	6.9451	1.70875
D-Alanine	1.0473	0.066723	0.66907	0.17453	0.243078
D-Alanyl-(R)-lactate	0.56916	-0.81309	0.00010251	3.9892	1.5057
D-allo-Isoleucine	1.5777	0.65782	8.1434e-05	4.0892	1.50641
D-Allothreonine	0.5862	-0.77052	0.11479	0.94009	0.798097
D-Altronate	0.81013	-0.30377	0.055359	1.2568	0.921979
D-Arabinonate	0.38848	-1.3641	0.011337	1.9455	1.12363
D-Arabinono-1,4-lactone	0.49866	-1.0039	0.0027036	2.5681	1.28043
D-Arabinose	1.234	0.30339	0.050383	1.2977	0.917996
D-Arabitol	0.42079	-1.2488	1.5857e-07	6.7998	1.69833
D-Arginine	0.81735	-0.29097	0.75518	0.12195	0.173061
D-Bornesitol	5.9899	2.5825	8.6528e-07	6.0628	1.66404
D-Fructose	0.80572	-0.31165	0.0093872	2.0275	1.13645
D-Fructuronate	0.93863	-0.091367	0.65082	0.18654	0.253889
D-Fuconate	0.80572	-0.31165	0.0093872	2.0275	1.13645
D-Galactarate	1.9648	0.97441	0.0028526	2.5448	1.28554
D-Galactonate	0.89614	-0.1582	0.28212	0.54957	0.567795
D-Galacturonate	0.93863	-0.091367	0.65082	0.18654	0.253889
D-Glucarate	1.9648	0.97441	0.0028526	2.5448	1.28554
D-Glucono-1,5-lactone 6-phosphate	0.88531	-0.17575	0.82575	0.083154	0.115701
D-Glucosaminate-6-phosphate	1.2911	0.36858	0.027066	1.5676	1.03693
D-Glucosamine	1.1194	0.16273	0.52023	0.28381	0.346485
D-Glutamate	0.96962	-0.044503	0.75518	0.12195	0.16453
D-Glutamine	0.8274	-0.27333	0.5123	0.29047	0.358312
D-Iditol	0.53091	-0.91346	2.207e-07	6.6562	1.6998
D-Lysine	2.1459	1.1016	9.8512e-05	4.0065	1.49559
D-Lysopine	0.11512	-3.1188	2.9278e-08	7.5335	1.73518
D-Lyxose	1.234	0.30339	0.050383	1.2977	0.917996
D-Mannonate	0.81013	-0.30377	0.055359	1.2568	0.921979
D-Mannuronate	1.0188	0.026871	0.90739	0.042208	0.0727522
D-Methionine	0.92506	-0.11239	0.4727	0.32542	0.354364
D-Octopine	0.084956	-3.5571	7.1878e-12	11.143	1.79738
D-Phenylalanine	0.99097	-0.013081	0.85058	0.070286	0.0919752
D-Proline	0.90383	-0.14587	0.3624	0.44081	0.486953
D-Ribitol 5-phosphate	4.0416	2.0149	3.6539e-05	4.4372	1.53725
D-Ribonate	0.38848	-1.3641	0.011337	1.9455	1.12363
D-Ribose	1.234	0.30339	0.050383	1.2977	0.917996
D-Ribulose	1.234	0.30339	0.050383	1.2977	0.917996
D-Serine	1.0101	0.014519	0.87306	0.058955	0.127543
D-Tagaturonate	0.93863	-0.091367	0.65082	0.18654	0.253889
D-Threonine	0.5862	-0.77052	0.11479	0.94009	0.798097
D-Xylonate	0.38848	-1.3641	0.011337	1.9455	1.12363
D-Xylono-1,4-lactone	0.49866	-1.0039	0.0027036	2.5681	1.28043
D-Xylonolactone	0.49866	-1.0039	0.0027036	2.5681	1.28043
D-Xylose	1.234	0.30339	0.050383	1.2977	0.917996
D-Xylulose	1.234	0.30339	0.050383	1.2977	0.917996
dCMP	0.62825	-0.6706	0.031544	1.5011	1.00015
Dehydroalanine	0.96962	-0.044503	0.75518	0.12195	0.16453
delta-(L-2-Aminoadipyl)-L-cysteinyl-D-valine	2.014	1.01	0.002482	2.6052	1.29773
Deoxy-5-methylcytidylate	1.7312	0.79174	0.00098288	3.0075	1.36641
Deoxyadenosine	0.39741	-1.3313	0.33938	0.46932	0.49
Deoxyguanidinoproclavaminic acid	0.12647	-2.9832	3.0864e-06	5.5106	1.61452
Deoxyinosine	0.71625	-0.48146	0.78676	0.10416	0.131141
Deoxythymidine 5'-phosphate (dTMP)	0.71541	-0.48316	0.70723	0.15044	0.18169
Dephospho-CoA	1.0422	0.059625	0.70794	0.15	0.221235
Desaminotyrosine	0.65661	-0.60689	0.057925	1.2371	0.889824
Dihydroneopterin phosphate	1.2911	0.36858	0.027066	1.5676	1.03693
Dihydroxyacetone	0.74696	-0.42091	0.51218	0.29058	0.375198
DL-Glycerol 1-phosphate	1.0485	0.068329	0.73979	0.13089	0.166417
Docosahexaenoic acid (DHA)	1.6101	0.68714	0.00082105	3.0856	1.38029
Docosapentaenoic acid (DPA)	1.2271	0.29523	0.09493	1.0226	0.841638
Dodecanoic acid	0.60979	-0.71362	8.5334e-05	4.0689	1.5032
Duroquinone	1.3638	0.44761	0.09493	1.0226	0.820578
dUTP	1.1567	0.21006	0.10882	0.9633	0.807939
Eicosapentaenoic acid	1.1605	0.21472	0.46178	0.33556	0.398677
Epimelibiose	1.1242	0.16886	0.1812	0.74184	0.676428
Ergothioneine	1.0659	0.092094	0.8441	0.073607	0.0936596
Erucamide	0.12114	-3.0453	0.00060009	3.2218	1.42013
Ethanolamine phosphate	2.6081	1.383	0.0013803	2.86	1.36969
Formate	1.3199	0.40046	0.058482	1.233	0.931872
Formylisoglutamine	1.456	0.542	0.18425	0.7346	0.686638
Galactitol	0.87932	-0.18553	0.22381	0.65011	0.604405
Galactose	0.87061	-0.19989	0.36214	0.44113	0.467854
gamma-Amino-gamma-cyanobutanoate	1.217	0.28335	0.36383	0.4391	0.44348
gamma-Glutamyl-beta-aminopropiononitrile	1.3365	0.41844	0.0027036	2.5681	1.29161
gamma-Glutamyl-beta-cyanoalanine	1.2868	0.3638	0.0031288	2.5046	1.28073
gamma-Glutamylalanine	0.92305	-0.11552	0.37703	0.42362	0.451089
gamma-Glutamyllysine	1.7222	0.78423	0.00023992	3.6199	1.45154
gamma-L-Glutamyl-D-alanine	0.85619	-0.22399	0.14168	0.84868	0.728865
gamma-Linolenic acid	0.25708	-1.9597	2.0019e-07	6.6986	1.70223
Glucitol	0.87932	-0.18553	0.22381	0.65011	0.604405
Gluconic acid	0.2979	-1.7471	2.835e-06	5.5474	1.64358
Glucose	0.87061	-0.19989	0.36214	0.44113	0.467854
Glucuronic acid	0.87167	-0.19815	0.052638	1.2787	0.93576
Glutamate	0.91582	-0.12687	0.20314	0.6922	0.634234
Glutamine	0.81352	-0.29774	0.093791	1.0278	0.825076
Glutathione disulfide	1.3092	0.38864	0.64395	0.19115	0.303102
Glutathionylaminopropylcadaverine	1.5743	0.6547	5.1397e-07	6.2891	1.67459
Glutathionylspermidine	1.6774	0.74619	0.10882	0.9633	0.762414
Glyceraldehyde	1.317	0.39728	8.8042e-07	6.0553	1.66965
Glycerol	0.42079	-1.2488	1.5857e-07	6.7998	1.69833
Glycerol 2-phosphate	1.0485	0.068329	0.73979	0.13089	0.166417
Glycolate	1.0202	0.028913	0.88491	0.053102	0.0637593
GTP	1.697	0.76295	3.4124e-05	4.4669	1.56953
Guanidinoproclavaminic acid	1.4168	0.50263	0.0034546	2.4616	1.24174
Guanosine	0.99402	-0.0086538	0.93835	0.027633	0.088137
Hexaethylene glycol	1.099	0.13621	0.4824	0.3166	0.336564
Hexanoylcarnitine (Car(6:0))	1.4229	0.50885	0.07631	1.1174	0.84585
Histamine	0.83027	-0.26835	0.28212	0.54957	0.550051
Homoarginine	1.127	0.17252	0.43366	0.36285	0.416407
Homocarnosine	1.7591	0.81487	0.0059815	2.2232	1.19776
Homoisocitrate	2.0831	1.0587	0.42696	0.36961	0.367669
Homoserine	0.7866	-0.34629	0.052638	1.2787	0.926036
Homoserine lactone	0.56916	-0.81309	0.00010251	3.9892	1.5057
Homovanillic acid sulfate	1.1374	0.18575	0.96512	0.015417	0.011598
Hydroquinone	0.32031	-1.6425	0.0025857	2.5874	1.29239
Hydroxyacetone	1.0194	0.027658	0.8441	0.073607	0.0996732
Hydroxyisocaproic acid	2.4523	1.2941	0.0035498	2.4498	1.24114
Hydroxyproline	0.87164	-0.1982	0.38648	0.41287	0.49012
Hypoxanthine	1.2758	0.35141	0.21681	0.66391	0.659225
Iditol	0.87932	-0.18553	0.22381	0.65011	0.604405
IDP	2.8084	1.4897	0.012774	1.8937	1.13205
IMP	0.0418	-4.5803	0.26782	0.57216	0.634265
Indole	0.9905	-0.013772	0.85345	0.068821	0.12988
Indolelactic acid	1.6439	0.71715	0.02654	1.5761	1.01041
Indoxyl sulfate	2.3205	1.2144	0.027684	1.5578	1.03943
Inosine	1.7779	0.83014	0.023069	1.637	1.0805
Iraldeine	0.95954	-0.059592	0.96913	0.013618	0.057908
Isobutyrylcarnitine (Car(4:0))	1.9294	0.94815	5.1813e-05	4.2856	1.54182
Isocitrate	4.0096	2.0035	0.011577	1.9364	1.15926
Isoleucine	1.5605	0.64204	0.00011935	3.9232	1.50129
Isomaltose	1.1242	0.16886	0.1812	0.74184	0.676428
Isonicotinylglycine	1.0188	0.026915	0.84157	0.074908	0.120278
Isotabtoxin	1.1804	0.23929	0.41098	0.38618	0.409138
Isovaleric acid	1.6896	0.75669	0.002482	2.6052	1.30781
Isovalerylcarnitine (Car(5:0))	2.2201	1.1506	3.6539e-05	4.4372	1.55888
Itaconate	0.49866	-1.0039	0.0027036	2.5681	1.28043
Ketoleucine	1.6068	0.68415	0.00064227	3.1923	1.39638
L-2-Aminoadipate 6-semialdehyde	1.2105	0.27564	0.24509	0.61067	0.573386
L-2-Methyltryptophan	1.3075	0.38681	0.076521	1.1162	0.866471
L-Alanine	1.0473	0.066723	0.66907	0.17453	0.243078
L-Alanyl-D-glutamate	0.85619	-0.22399	0.14168	0.84868	0.728865
L-Alanyl-gamma-D-glutamyl-meso-2,6-diaminoheptanedioate	1.2048	0.26876	0.15901	0.79857	0.687229
L-Alanyl-L-glutamate	0.85619	-0.22399	0.14168	0.84868	0.728865
L-Allothreonine	0.5862	-0.77052	0.11479	0.94009	0.798097
L-Altarate	1.9648	0.97441	0.0028526	2.5448	1.28554
L-Arabinonate	0.38848	-1.3641	0.011337	1.9455	1.12363
L-Arabinono-1,4-lactone	0.49866	-1.0039	0.0027036	2.5681	1.28043
L-Arabinose	1.234	0.30339	0.050383	1.2977	0.917996
L-Arginine	0.78636	-0.34673	0.054465	1.2639	0.890175
L-Bornesitol	5.9899	2.5825	8.6528e-07	6.0628	1.66404
L-Carnitine	1.1145	0.15644	0.6814	0.1666	0.239582
L-Citrulline	1.0872	0.12065	0.36214	0.44113	0.492682
L-Cystine	0.61476	-0.7019	0.00060009	3.2218	1.40463
L-Formylkynurenine	1.3474	0.43023	0.07631	1.1174	0.842001
L-Fuconate	0.80572	-0.31165	0.0093872	2.0275	1.13645
L-Fuculose 1-phosphate	0.93617	-0.095157	0.53128	0.27468	0.303521
L-Galactonate	0.81013	-0.30377	0.055359	1.2568	0.921979
L-Glutamate 5-semialdehyde	0.87164	-0.1982	0.38648	0.41287	0.49012
L-Gulonate	0.81013	-0.30377	0.055359	1.2568	0.921979
L-Histidine	0.70615	-0.50196	0.055359	1.2568	0.924354
L-Homocitrulline	1.227	0.29513	0.38648	0.41287	0.445438
L-Idonate	0.81013	-0.30377	0.055359	1.2568	0.921979
L-Lyxose	1.234	0.30339	0.050383	1.2977	0.917996
L-Methionine	1.0117	0.01674	0.5749	0.24041	0.299904
L-Mimosine	1.6624	0.73328	4.6856e-05	4.3292	1.52774
L-N2-(2-Carboxyethyl)arginine	0.084956	-3.5571	7.1878e-12	11.143	1.79738
L-Proline	0.90383	-0.14587	0.3624	0.44081	0.486953
L-Rhamnonate	0.80572	-0.31165	0.0093872	2.0275	1.13645
L-Rhamnulose 1-phosphate	0.93617	-0.095157	0.53128	0.27468	0.303521
L-Ribulose	1.234	0.30339	0.050383	1.2977	0.917996
L-Serine	1.0101	0.014519	0.87306	0.058955	0.127543
L-threo-3-Methylaspartate	0.96962	-0.044503	0.75518	0.12195	0.16453
L-threo-3-Phenylserine	0.86173	-0.2147	0.70723	0.15044	0.205018
L-Threonine	0.5862	-0.77052	0.11479	0.94009	0.798097
L-Threonylcarbamoyladenylate	1.2085	0.27327	0.0098686	2.0057	1.15579
L-Tryptophan	0.88966	-0.16867	0.32087	0.49368	0.55099
L-Tyrosine	0.86173	-0.2147	0.70723	0.15044	0.205018
L-Valine	0.9527	-0.069909	0.81679	0.087887	0.112054
L-Xylulose	1.234	0.30339	0.050383	1.2977	0.917996
Lactaldehyde	1.0504	0.070913	0.57656	0.23915	0.328639
Lactate	1.9006	0.92646	0.52309	0.28142	0.349877
Lactose	1.1242	0.16886	0.1812	0.74184	0.676428
Laminaribiose	1.1242	0.16886	0.1812	0.74184	0.676428
Lauramine oxide	0.62266	-0.68349	0.0045617	2.3409	1.24975
Lauric diethanolamide	1.4107	0.49637	0.0073803	2.1319	1.1764
Leucine	1.2215	0.28862	0.064591	1.1898	0.893163
Linatine	1.3365	0.41844	0.0027036	2.5681	1.29161
LPA(20:4)_RT498	1.6805	0.74885	0.002371	2.6251	1.27868
LPC(13:0)	0.94966	-0.07451	0.83771	0.076907	0.131674
LPC(14:0)_RT480	0.45579	-1.1336	0.00011737	3.9304	1.47984
LPC(16:0)	1.4396	0.52572	0.18785	0.72619	0.667942
LPC(16:1)_RT487	0.70483	-0.50466	0.045451	1.3425	0.966584
LPC(16:1)_RT504	0.70483	-0.50466	0.045451	1.3425	0.966584
LPC(17:0/0:0)	1.5925	0.67128	0.12479	0.90382	0.752792
LPC(18:0/0:0)	1.0593	0.083098	0.64195	0.1925	0.256593
LPC(18:1)	0.67296	-0.57141	0.5153	0.28794	0.36729
LPC(18:2/0:0)	0.60177	-0.73271	4.6856e-05	4.3292	1.54151
LPC(18:3)_RT477	1.6503	0.72277	0.057925	1.2371	0.888888
LPC(19:0)_RT555	0.74484	-0.425	0.23915	0.62132	0.648887
LPC(20:3)_RT505	1.1804	0.23932	0.38648	0.41287	0.433644
LPC(20:4)_RT492	1.663	0.73376	0.078814	1.1034	0.852554
LPC(22:6)_RT487	2.1084	1.0762	1.6684e-05	4.7777	1.59152
LPC(O-16:0)_RT528	1.5444	0.627	0.089055	1.0503	0.821091
LPC(O-18:1)_RT531	1.8823	0.9125	0.00082162	3.0853	1.37737
LPE(16:0)	1.1209	0.16472	0.35195	0.45352	0.470705
LPE(P-16:0)_RT532	0.80022	-0.32154	0.10098	0.99578	0.794545
LPI(18:2)_RT532	0.24655	-2.02	3.0952e-07	6.5093	1.68718
LPI(20:3)_RT553	0.96107	-0.057294	0.7434	0.12878	0.185231
LPS(18:1)	0.69612	-0.5226	0.23974	0.62026	0.565895
Lumichrome	0.98549	-0.021091	0.84836	0.071422	0.130472
Lysine	2.5932	1.3747	1.3624e-05	4.8657	1.59016
Malic acid	1.6088	0.68599	0.023181	1.6349	1.07455
Maltose	0.61724	-0.6961	0.035374	1.4513	1.01388
Mannitol	0.87932	-0.18553	0.22381	0.65011	0.604405
Mannobiose	1.1242	0.16886	0.1812	0.74184	0.676428
Melibiose	1.4846	0.57007	0.12521	0.90235	0.749383
Mesaconate	0.49866	-1.0039	0.0027036	2.5681	1.28043
Methionine sulfoxide	0.25311	-1.9821	1.1386e-11	10.944	1.80255
Methyl beta-D-galactoside	5.9899	2.5825	8.6528e-07	6.0628	1.66404
myo-Inositol	0.30313	-1.722	1.334e-06	5.8749	1.63869
Myristic acid	0.56961	-0.81195	7.6465e-08	7.1165	1.71573
N-(Carboxymethyl)-D-alanine	0.96962	-0.044503	0.75518	0.12195	0.16453
N-(L-Arginino)succinate	2.3373	1.2248	0.0020378	2.6908	1.29226
N-Acetyl-4-O-acetylneuraminate	0.906	-0.14242	0.36214	0.44113	0.479979
N-Acetyl-7-O-acetylneuraminate	0.906	-0.14242	0.36214	0.44113	0.479979
N-Acetyl-9-O-acetylneuraminate	0.906	-0.14242	0.36214	0.44113	0.479979
N-Acetyl-beta-alanine	0.87164	-0.1982	0.38648	0.41287	0.49012
N-Acetyl-D-glucosaminate	0.8056	-0.31186	0.070074	1.1544	0.890334
N-Acetyl-D-glucosamine	1.4606	0.54656	0.2225	0.65267	0.666026
N-Acetyl-D-mannosamine	1.4606	0.54656	0.2225	0.65267	0.666026
N-Acetyl-L-aspartate	0.85331	-0.22885	0.34666	0.46009	0.482945
N-Acetyl-L-glutamate 5-semialdehyde	2.7279	1.4478	0.00018881	3.724	1.47815
N-Acetylalanine	1.5002	0.58516	0.0030119	2.5212	1.25333
N-Acetylmuramic acid 6-phosphate	0.6076	-0.71882	0.0010253	2.9892	1.34037
N-Acetylneuraminate	0.71503	-0.48393	0.00066485	3.1773	1.40511
N-Acetylserotonin	1.6778	0.7466	0.051368	1.2893	0.95234
N-D-Ribosylpurine	4.6353	2.2126	6.2552e-06	5.2038	1.62469
N-Formimino-L-glutamate	0.97904	-0.030555	0.9773	0.0099736	0.0177266
N-Formyl-L-glutamate	0.85331	-0.22885	0.34666	0.46009	0.482945
N-Formylmethionine	1.4593	0.54524	0.0047065	2.3273	1.22628
N-Lactoylphenylalanine	1.2563	0.32917	0.11479	0.94009	0.79185
N-Methyl-2-oxoglutaramate	0.42886	-1.2214	0.011491	1.9396	1.14178
N-Methyl-L-alanine	0.93066	-0.10368	0.55766	0.25363	0.329018
N-Methyl-L-glutamate	0.49102	-1.0262	0.0030119	2.5212	1.25898
N-Methylethanolamine phosphate	0.9527	-0.069909	0.81679	0.087887	0.112054
N-Methylglutamic acid	1.1432	0.19307	0.30872	0.51044	0.561494
N-Succinyl-L-glutamate	1.0453	0.063912	0.44841	0.34832	0.388648
N-Succinyl-L-glutamate 5-semialdehyde	2.1277	1.0893	0.0044778	2.3489	1.23585
N-Succinyl-LL-2,6-diaminoheptanedioate	0.67678	-0.56325	0.0059815	2.2232	1.17958
N(alpha)-gamma-L-Glutamylhistamine	1.9243	0.94437	3.7097e-05	4.4307	1.5589
N(pi)-Methyl-L-histidine	1.1581	0.21175	0.13653	0.86478	0.758993
N,N-Dimethylglycine	0.93066	-0.10368	0.55766	0.25363	0.329018
N1-Methyl-2-pyridone-5-carboxamide	0.99423	-0.008343	0.73555	0.13339	0.20861
N1-Methyl-4-pyridone-3-carboxamide	0.99423	-0.008343	0.73555	0.13339	0.20861
N2-Acetyllysine	2.2576	1.1748	1.6682e-05	4.7777	1.57034
N2-Acetylornithine	1.5877	0.66691	0.15843	0.80016	0.73414
N2-Succinyl-L-ornithine	0.8503	-0.23395	0.33938	0.46932	0.486764
N2,N2-Dimethylguanosine	1.5937	0.6724	0.00012882	3.89	1.50536
N3-Fumaroyl-L-2,3-diaminopropanoate	0.92618	-0.11063	0.41326	0.38378	0.444199
N4-(Acetyl-beta-D-glucosaminyl)asparagine	1.2768	0.35251	0.12854	0.89098	0.779666
N4-Acetylcytidine	1.7197	0.78215	0.036807	1.4341	0.977527
N5-(L-1-Carboxyethyl)-L-ornithine	0.18466	-2.4371	2.2697e-11	10.644	1.80369
N5-Ethyl-L-glutamine	1.3563	0.43969	0.88171	0.054676	0.103008
N6-(1,2-Dicarboxyethyl)-AMP	1.2272	0.29536	0.00096227	3.0167	1.38153
N6-(Delta2-Isopentenyl)-adenine	0.85549	-0.22518	0.37072	0.43096	0.500791
N6-(L-1,3-Dicarboxypropyl)-L-lysine	1.7684	0.82248	0.00065252	3.1854	1.38982
N6-Acetyl-L-lysine	1.5893	0.66835	0.0013321	2.8755	1.33888
NAD+	0.94058	-0.088374	0.32704	0.4854	0.53066
Nervonic acid	1.3155	0.39565	0.21663	0.66428	0.635758
Nicotinamide	1.1545	0.20725	0.27663	0.5581	0.571721
Nicotinate D-ribonucleoside	2.5216	1.3343	3.3025e-06	5.4812	1.64023
Nicotinic acid adenine dinucleotide phosphate	1.159	0.2129	0.054184	1.2661	0.91952
Nicotinurate	1.0188	0.026915	0.84157	0.074908	0.120278
Nigerose	1.1242	0.16886	0.1812	0.74184	0.676428
Nopaline	1.5722	0.65279	0.01935	1.7133	1.10532
O-Acetyl-L-homoserine	1.4606	0.54656	0.2225	0.65267	0.666026
O-Acetyl-L-serine	0.96962	-0.044503	0.75518	0.12195	0.16453
O-Carbamoyladenylate	1.3633	0.44708	0.41326	0.38378	0.426471
O-Succinyl-L-homoserine	0.84836	-0.23725	0.15654	0.80537	0.707192
Octadecanedioic acid	0.81591	-0.29351	0.53128	0.27468	0.327959
Octanoylcarnitine (Car(8:0))	1.3866	0.47155	0.16646	0.77869	0.698404
Octenoylcarnitine (Car(8:1)_RT300)	2.9009	1.5365	1.2404e-05	4.9065	1.60836
Octenoylcarnitine (Car(8:1)_RT329)	2.9009	1.5365	1.2404e-05	4.9065	1.60836
Oleamide	0.082256	-3.6037	0.0051966	2.2843	1.24168
Oleic acid	1.083	0.11508	0.97298	0.011895	0.0223503
Oleoylcarnitine (Car(18:1)_RT511)	1.1665	0.22218	0.36214	0.44113	0.501725
Ophthalmate	1.1804	0.23929	0.41098	0.38618	0.409138
Ornithine	0.93932	-0.090311	0.5713	0.24314	0.254776
Orotidine 5'-phosphate	1.3676	0.45169	0.039635	1.4019	0.973541
Oxooctanoylcarnitine (Car(8:1-O)_RT225)	2.6042	1.3808	3.1048e-10	9.508	1.78275
Oxooctanoylcarnitine (Car(8:1-O)_RT240)	2.6042	1.3808	3.1048e-10	9.508	1.78275
P1,P4-Bis(5'-uridyl) tetraphosphate	0.85382	-0.228	0.15316	0.81485	0.695426
Palatinose	1.1242	0.16886	0.1812	0.74184	0.676428
Palmitamide	0.034474	-4.8584	0.00082101	3.0856	1.39338
Palmitoleylcarnitine (Car(16:1)_RT478)	1.0589	0.082582	0.95648	0.019326	0.0369613
Palmitoylcarnitine (Car(16:0))	2.2537	1.1723	0.049921	1.3017	0.938027
Pantothenate	0.77543	-0.36693	0.36056	0.44302	0.510297
Parapyruvate	0.64302	-0.63705	0.036807	1.4341	1.00143
PC(14:0/16:0)	0.49833	-1.0048	0.0030662	2.5134	1.25452
PC(18:0/18:0)	0.94357	-0.083804	0.69601	0.15738	0.233806
PC(18:1(6Z)/18:1(6Z))	0.77825	-0.3617	0.052827	1.2771	0.916633
PC(18:1(9E)/18:1(9E))	0.77825	-0.3617	0.052827	1.2771	0.916633
PC(18:1(9Z)/18:1(9Z))	0.77825	-0.3617	0.052827	1.2771	0.916633
PC(32:1)_RT549	0.4974	-1.0075	0.0001871	3.7279	1.45797
PC(32:1)_RT639	0.4974	-1.0075	0.0001871	3.7279	1.45797
PC(32:2)_RT616	0.21087	-2.2456	5.4915e-11	10.26	1.79139
PC(33:2)_RT627	0.3987	-1.3266	4.7419e-05	4.324	1.53441
PC(34:4)_RT606	0.7035	-0.50738	0.045451	1.3425	0.911713
PC(34:5)_RT593	0.90735	-0.14027	0.66462	0.17743	0.233401
PC(35:4)_RT617	1.5134	0.59782	0.0034546	2.4616	1.25569
PC(36:5)_RT611	0.96664	-0.048955	0.9741	0.011397	0.00732879
PC(37:4)_RT641	1.6499	0.72241	0.028307	1.5481	1.07018
PC(37:5)_RT618	1.0463	0.065357	0.669	0.17457	0.249951
PC(38:2)_RT619	0.85634	-0.22375	0.053073	1.2751	0.950274
PC(38:2)_RT629	0.85634	-0.22375	0.053073	1.2751	0.950274
PC(38:2)_RT639	0.85634	-0.22375	0.053073	1.2751	0.950274
PC(38:4)_RT563	1.5963	0.6747	0.00021781	3.6619	1.483
PC(38:4)_RT586	1.5963	0.6747	0.00021781	3.6619	1.483
PC(38:4)_RT643	1.5963	0.6747	0.00021781	3.6619	1.483
PC(38:7)_RT600	1.1692	0.22557	0.10882	0.9633	0.832507
PC(38:8)_RT588	1.0768	0.10672	0.55766	0.25363	0.336911
PC(40:4)_RT589	2.0205	1.0147	1.6684e-05	4.7777	1.59088
PC(40:4)_RT600	2.0205	1.0147	1.6684e-05	4.7777	1.59088
PC(40:4)_RT611	2.0205	1.0147	1.6684e-05	4.7777	1.59088
PC(40:6)_RT549	1.744	0.80242	2.9337e-05	4.5326	1.57519
PC(40:6)_RT642	1.744	0.80242	2.9337e-05	4.5326	1.57519
PC(40:7)_RT616	2.8166	1.4939	0.00074585	3.1274	1.40957
PC(40:7)_RT643	2.8166	1.4939	0.00074585	3.1274	1.40957
PC(40:9)_RT590	1.337	0.419	0.0072296	2.1409	1.21443
PC(42:10)_RT595	0.7649	-0.38667	0.0078422	2.1056	1.1771
PC(42:11)_RT584	1.3926	0.47781	0.16646	0.77869	0.721151
PC(P-16:0/0:0)	1.059	0.08264	0.97191	0.012372	0.00712882
PC(P-32:0)_RT566	1.1356	0.18341	0.32612	0.48662	0.546074
PC(P-32:0)_RT609	1.1086	0.14872	0.48812	0.31147	0.371203
PE(18:0/18:2)	0.3987	-1.3266	4.7419e-05	4.324	1.53441
Pentaethylene glycol	1.418	0.50385	0.052638	1.2787	0.898562
Phenylalanine	0.95181	-0.071262	0.45088	0.34594	0.416677
Phenylsulfate	0.61078	-0.71128	0.020038	1.6981	1.06583
Prolylhydroxyproline	0.7315	-0.45106	0.073812	1.1319	0.897687
Propanoate	0.98311	-0.024572	0.79948	0.097192	0.134957
Pyridoxal (Vitamin B6)	0.70814	-0.4979	0.071718	1.1444	0.85852
Pyrocatechol	0.32031	-1.6425	0.0025857	2.5874	1.29239
Pyrogallol	0.96485	-0.051618	0.86877	0.061094	0.124555
Pyruvate	1.5295	0.61307	0.017135	1.7661	1.05781
Raffinose	0.28377	-1.8172	4.1794e-06	5.3789	1.61351
Ribitol	0.42079	-1.2488	1.5857e-07	6.7998	1.69833
Ribothymidine	1.6598	0.73103	0.028831	1.5401	1.02063
S-(4-Methylthiobutylthiohydroximoyl)-L-cysteine	0.67597	-0.56496	0.071718	1.1444	0.858023
S-(Hercyn-2-yl)-L-cysteine S-oxide	1.0806	0.11177	0.51701	0.2865	0.36624
S-(Hydroxyphenylacetothiohydroximoyl)-L-cysteine	5.6577	2.5002	2.9278e-08	7.5335	1.73792
S-Acetylphosphopantetheine	1.0947	0.13053	0.75734	0.12071	0.159268
S-Adenosyl-L-homocysteine	0.57502	-0.79832	0.00096227	3.0167	1.33195
S-Adenosylmethioninamine	1.4664	0.55227	0.44273	0.35386	0.440078
S-Adenosylmethionine	0.99101	-0.013026	0.84157	0.074908	0.0974882
S-Ribosyl-L-homocysteine	0.48301	-1.0499	0.0044179	2.3548	1.24342
S-Succinylglutathione	0.62026	-0.68906	0.049992	1.3011	0.956952
S-Sulfanylglutathione	1.5355	0.61875	0.024914	1.6036	1.05246
S-Sulfo-L-cysteine	0.9618	-0.056189	0.68255	0.16587	0.248346
S1P(d18:1)	1.4977	0.58275	0.10648	0.97275	0.77457
Salicylic acid	0.131	-2.9323	1.1529e-07	6.9382	1.71355
Sarcosine	1.306	0.38511	0.024914	1.6036	1.05171
scyllo-Inositol	0.80572	-0.31165	0.0093872	2.0275	1.13645
Serine	1.3885	0.47349	7.1002e-05	4.1487	1.53888
Serotonin	1.48	0.56561	0.00082162	3.0853	1.35212
SM(d18:1/18:0)	0.89348	-0.1625	0.9773	0.0099736	0.0210814
SM(d34:1)_RT600	1.2115	0.27685	0.71525	0.14554	0.19788
SM(d36:2)_RT532	1.0485	0.068333	0.46962	0.32825	0.414449
sn-Glycero-3-phospho-1-inositol	0.65225	-0.61651	0.028247	1.549	1.02555
sn-Glycero-3-phosphocholine	1.4409	0.52701	0.00066677	3.176	1.40129
sn-Glycero-3-phosphoethanolamine	1.3079	0.38723	0.0098686	2.0057	1.13099
sn-Glycerol 1-phosphate	1.0485	0.068329	0.73979	0.13089	0.166417
sn-Glycerol 3-phosphate	1.0485	0.068329	0.73979	0.13089	0.166417
Sphingosyl-phosphocholine	0.60458	-0.726	0.00011935	3.9232	1.50635
Succinate	1.1249	0.16986	0.33925	0.46948	0.520723
Sucrose	0.60563	-0.72348	0.038588	1.4136	0.999701
Tabtoxin	1.6818	0.75001	0.00057412	3.241	1.41233
Tabtoxinine-beta-lactam	1.217	0.28335	0.36383	0.4391	0.44348
Tabtoxinine-delta-lactam	1.217	0.28335	0.36383	0.4391	0.44348
Tauro-gamma-muricholic acid	0.57736	-0.79247	7.7385e-05	4.1113	1.51899
Taurochenodeoxycholic acid	0.066439	-3.9118	0.00018639	3.7296	1.46958
Taurocholic acid	0.57736	-0.79247	7.7385e-05	4.1113	1.51899
Taurodeoxycholic acid	0.15459	-2.6935	0.00021781	3.6619	1.45323
Taurolithocholate sulfate	0.22118	-2.1767	1.3277e-05	4.8769	1.60595
Taurolithocholic acid	0.30046	-1.7348	0.0014883	2.8273	1.32716
Tauroursodeoxycholic acid	0.15459	-2.6935	0.00021781	3.6619	1.45323
Threonate	1.2637	0.3376	0.24985	0.60233	0.647944
Thymidine	0.99993	-0.00010658	0.52713	0.27808	0.370691
trans-Vaccenic acid	1.083	0.11508	0.97298	0.011895	0.0223503
Trehalose	0.60563	-0.72348	0.038588	1.4136	0.999701
Trigonelline	1.3029	0.38174	0.25169	0.59913	0.598806
Trp-Glu	0.84685	-0.23982	0.20243	0.69373	0.641924
Tryptamine	1.4747	0.56043	0.16419	0.78465	0.725749
Tryptophan	0.81278	-0.29906	0.046894	1.3289	0.967169
UDP	0.88569	-0.17513	0.30743	0.51226	0.54524
UDP-glucuronate	1.2244	0.29207	0.3198	0.49512	0.499835
UDP-L-Ara4N	5.2608	2.3953	6.2073e-10	9.2071	1.76277
Uracil	2.3968	1.2611	0.0031509	2.5016	1.28731
Uridine	0.8576	-0.22162	0.82111	0.085597	0.154714
Valeric acid	1.6896	0.75669	0.002482	2.6052	1.30781
Valerylcarnitine	2.2201	1.1506	3.6539e-05	4.4372	1.55888
Xanthoxylin	3.3435	1.7414	1.3314e-06	5.8757	1.6614
Xylitol	0.42079	-1.2488	1.5857e-07	6.7998	1.69833
Xylitol 5-phosphate	4.0416	2.0149	3.6539e-05	4.4372	1.53725
