# Supplementary material for: Akkermansia muciniphila Enhances Resistance to Infectious Bronchitis Virus in Chickens Through γ-Aminobutyric Acid-Mediated Anti-Inflammatory Pathways
Source: Research Square preprint supplement (doi:10.21203/rs.3.rs-6786224/v1), 2025-06-25
Supplement: Supplementary file 3 [file 311a71085ac9dcbd9af37143.xlsx]

## Sheet: Phylum
Table S2. Taxonomic classification of 16S rRNA gene amplicons from adult, young, and young-FMT samples.
Taxonomy	Adult1	Adult2	Adult3	Adult4	Adult5	Adult6	Adult7	Adult8	Adult9	Adult10	Adult11	Adult12	Adult13	Adult14	Adult15	Adult16	Adult17	Adult18	Adult19	Adult20	Young1	Young2	Young3	Young4	Young5	Young6	Young7	Young8	Young9	Young10	Young11	Young12	Young13	Young14	Young15	Young16	Young17	Young18	Young19	Young20	Young_FMT1	Young_FMT2	Young_FMT3	Young_FMT4	Young_FMT5	Young_FMT6	Young_FMT7	Young_FMT8	Young_FMT9
Archaea;Euryarchaeota	0	0	0	0	1	0	0	1	0	3	1	0	1	1	0	0	0	1	1	1	0	0	0	0	0	0	0	0	0	0	0	0	0	0	0	1	0	0	0	0	1	1	4	1	1	1	1	1	1
Bacteria;Actinobacteria	164	492	157	659	542	1483	618	1050	1658	2652	364	880	1541	442	218	290	734	138	706	1309	171	200	109	56	114	34	48	421	105	71	73	20	9	79	112	729	1142	1489	200	552	600	628	656	464	249	74	363	190	373
Bacteria;Bacteroidetes	15318	1149	18551	1134	1591	2336	7706	1226	2185	398	18064	13205	876	2369	12844	13188	195	18577	111	5148	8849	79	6170	458	20868	2032	4359	1296	8230	14462	46	8887	3792	7789	239	5942	1635	6668	1371	6150	537	20924	168	1293	465	18333	1578	11700	3433
Bacteria;Candidatus_Saccharibacteria	0	0	2	2	0	583	4	153	82	31	0	9	33	18	3	12	104	0	14	155	0	2	1	0	1	0	0	0	0	0	0	0	0	0	0	0	0	0	0	0	4	15	31	1	1	0	20	7	44
Bacteria;Deferribacteres	266	15	602	15	8	21	158	2	23	35	152	35	3	18	174	117	1	94	1	20	0	0	0	0	0	0	0	0	0	0	0	0	0	0	0	0	0	0	0	0	9	156	0	3	4	164	30	50	15
Bacteria;Deinococcus-Thermus	0	0	0	0	0	8	3	11	14	31	0	0	0	0	0	0	0	0	0	0	0	0	0	0	0	0	0	0	0	0	0	0	0	0	0	0	0	0	0	0	0	0	0	0	0	0	0	0	0
Bacteria;Elusimicrobia	78	6	37	6	4	8	51	9	11	4	190	5	8	1	117	60	1	127	2	10	0	0	0	0	1	0	0	0	0	0	0	0	0	0	0	0	0	0	0	0	4	141	2	2	2	177	9	33	22
Bacteria;Firmicutes	12897	25085	12943	24014	33611	24475	24945	18490	17864	19561	14918	24371	29457	29447	18064	21079	21377	13800	33066	26889	36337	46011	38672	44462	25544	40775	47254	40911	35044	25536	42647	31438	38738	31674	44088	38217	42275	36447	43524	37804	29890	11940	26488	36437	33236	13380	30910	23829	29495
Bacteria;Fusobacteria	53	6	43	1	4	8	200	0	0	0	442	15	2	11	619	118	3	145	8	14	0	0	0	0	0	0	0	0	0	0	0	0	0	0	0	0	0	0	0	0	0	183	0	0	2	301	1	142	38
Bacteria;Lentisphaerae	32	0	7	5	0	0	15	1	1	0	9	0	0	0	3	10	0	20	0	0	0	0	0	0	2	0	0	0	0	0	0	16	4	8	0	0	0	1	0	1	0	9	0	1	0	7	0	2	1
Bacteria;Other	2348	3504	765	1203	1829	833	414	598	948	848	790	1974	3250	4659	1590	903	4591	888	2406	2000	82	72	72	92	85	129	128	114	128	133	144	176	273	136	236	156	554	645	496	643	5643	1061	3923	728	1539	1695	2477	2675	2197
Bacteria;Proteobacteria	3478	1203	2820	460	504	8560	5876	4817	9786	7109	1870	406	349	287	1416	1327	382	1935	147	556	584	3393	170	182	698	344	1216	627	2562	4982	290	242	1541	3656	92	421	407	228	674	949	196	1521	509	702	622	2815	440	1219	654
Bacteria;Spirochaetes	139	1	72	1	15	0	0	1	0	0	36	31	12	19	27	193	3	28	4	254	0	0	0	2	0	0	0	0	0	0	0	0	0	0	0	0	0	0	0	0	26	211	2	2	1	15	3	12	0
Bacteria;Synergistetes	6355	26333	4047	24805	9242	9798	4979	16008	16125	14723	2580	2257	11360	8091	1608	4230	18829	1975	11080	6517	5	10	2	30	9	46	82	32	19	10	0	17	2	1	1	40	11	36	36	39	6007	1445	10882	5481	7418	3000	11277	5068	4774
Bacteria;Tenericutes	0	0	5	0	0	2	1	5	0	0	3	1	1	1	1	0	0	1	1	0	31	0	9	0	20	1	19	19	1	27	0	16	30	63	0	4	0	13	0	13	0	0	1	3	4	6	4	1	0
Bacteria;Verrucomicrobia	38	10	143	49	59	498	291	6082	1759	4564	139	25	537	229	74	108	39	181	171	184	0	0	0	0	0	0	0	0	0	0	0	0	0	2	7	23	14	5	0	26	34	33	12	79	46	146	534	39	188
[truncated: 11 more columns]

## Sheet: Class
Taxonomy	Adult1	Adult2	Adult3	Adult4	Adult5	Adult6	Adult7	Adult8	Adult9	Adult10	Adult11	Adult12	Adult13	Adult14	Adult15	Adult16	Adult17	Adult18	Adult19	Adult20	Young1	Young2	Young3	Young4	Young5	Young6	Young7	Young8	Young9	Young10	Young11	Young12	Young13	Young14	Young15	Young16	Young17	Young18	Young19	Young20	Young_FMT1	Young_FMT2	Young_FMT3	Young_FMT4	Young_FMT5	Young_FMT6	Young_FMT7	Young_FMT8	Young_FMT9
Archaea;Euryarchaeota;Methanobacteria	0	0	0	0	1	0	0	1	0	3	1	0	1	1	0	0	0	1	1	1	0	0	0	0	0	0	0	0	0	0	0	0	0	0	0	1	0	0	0	0	1	1	4	1	1	1	1	1	1
Archaea;Euryarchaeota;Methanomicrobia	0	0	0	0	0	0	0	0	0	0	0	0	0	0	0	0	0	0	0	0	0	0	0	0	0	0	0	0	0	0	0	0	0	0	0	0	0	0	0	0	0	0	0	0	0	0	0	0	0
Bacteria;Actinobacteria;Actinobacteria	164	492	157	659	542	1483	618	1050	1658	2652	364	880	1541	442	218	290	734	138	706	1309	171	200	109	56	114	34	48	421	105	71	73	20	9	79	112	729	1142	1489	200	552	600	628	656	464	249	74	363	190	373
Bacteria;Bacteroidetes;Bacteroidia	15051	1092	17817	1031	1552	2243	7591	1164	2149	377	16654	12921	834	2167	11866	12512	188	17254	111	4551	8844	79	6153	458	20801	2032	4359	1296	8230	14462	46	8887	3792	7789	239	5696	1598	6507	1324	5908	507	20149	159	1134	448	18036	1447	11316	3297
Bacteria;Bacteroidetes;Flavobacteriia	32	3	20	4	0	7	48	2	10	4	12	0	0	14	0	33	0	105	0	29	0	0	0	0	0	0	0	0	0	0	0	0	0	0	0	0	0	0	0	0	4	8	0	3	0	34	14	6	4
Bacteria;Bacteroidetes;Other	235	54	714	99	39	86	67	60	26	17	1398	284	42	188	978	643	7	1218	0	568	5	0	17	0	67	0	0	0	0	0	0	0	0	0	0	246	37	161	47	242	26	767	9	156	17	263	117	378	132
Bacteria;Candidatus_Saccharibacteria;Unclassified	0	0	2	2	0	583	4	153	82	31	0	9	33	18	3	12	104	0	14	155	0	2	1	0	1	0	0	0	0	0	0	0	0	0	0	0	0	0	0	0	4	15	31	1	1	0	20	7	44
Bacteria;Deferribacteres;Deferribacteres	266	15	602	15	8	21	158	2	23	35	152	35	3	18	174	117	1	94	1	20	0	0	0	0	0	0	0	0	0	0	0	0	0	0	0	0	0	0	0	0	9	156	0	3	4	164	30	50	15
Bacteria;Deinococcus-Thermus;Deinococci	0	0	0	0	0	8	3	11	14	31	0	0	0	0	0	0	0	0	0	0	0	0	0	0	0	0	0	0	0	0	0	0	0	0	0	0	0	0	0	0	0	0	0	0	0	0	0	0	0
Bacteria;Elusimicrobia;Elusimicrobia	78	6	37	6	4	8	51	9	11	4	190	5	8	1	117	60	1	127	2	10	0	0	0	0	1	0	0	0	0	0	0	0	0	0	0	0	0	0	0	0	4	141	2	2	2	177	9	33	22
Bacteria;Firmicutes;Bacilli	42	31	50	36	45	818	423	347	1640	2300	63	141	213	139	87	72	21	123	126	127	791	407	307	236	531	188	484	191	982	277	189	536	390	512	288	209	412	351	339	163	177	99	85	232	194	47	110	57	140
Bacteria;Firmicutes;Clostridia	9442	20431	8793	22328	27618	15176	14112	13764	10888	13646	10928	20768	27794	28100	16367	19421	20213	11774	30896	25513	25805	41908	34136	41498	22334	32709	41400	35619	28691	22300	40796	29952	37552	28606	42025	36868	40942	34341	41684	35579	27889	10171	24096	32416	29891	10702	29242	19636	27700
Bacteria;Firmicutes;Erysipelotrichia	49	26	70	171	124	117	164	113	91	213	81	139	122	188	46	53	75	55	91	88	1139	3110	3862	654	968	289	194	363	506	378	304	457	331	191	1019	238	325	303	534	330	121	66	50	166	92	26	202	32	59
Bacteria;Firmicutes;Negativicutes	3010	4022	3689	918	5431	7904	9860	3435	4362	2660	3512	2798	451	435	1107	1117	273	1238	670	637	8157	520	37	1329	1348	7458	5058	4504	4825	2491	895	81	215	2291	386	729	352	1153	561	1362	916	1209	1021	2520	1573	2091	881	3472	973
Bacteria;Firmicutes;Other	354	575	341	561	393	460	386	831	883	742	334	525	877	585	457	416	795	610	1283	524	445	66	330	745	363	131	118	234	40	90	463	412	250	74	370	173	244	299	406	370	787	395	1236	1103	1486	514	475	632	623
Bacteria;Fusobacteria;Fusobacteriia	53	6	43	1	4	8	200	0	0	0	442	15	2	11	619	118	3	145	8	14	0	0	0	0	0	0	0	0	0	0	0	0	0	0	0	0	0	0	0	0	0	183	0	0	2	301	1	142	38
Bacteria;Lentisphaerae;Lentisphaeria	32	0	7	5	0	0	15	1	1	0	9	0	0	0	3	10	0	20	0	0	0	0	0	0	2	0	0	0	0	0	0	16	4	8	0	0	0	1	0	1	0	9	0	1	0	7	0	2	1
Bacteria;Other;Other	2348	3504	765	1203	1829	833	414	598	948	848	790	1974	3250	4659	1590	903	4591	888	2406	2000	82	72	72	92	85	129	128	114	128	133	144	176	273	136	236	156	554	645	496	643	5643	1061	3923	728	1539	1695	2477	2675	2197
Bacteria;Proteobacteria;Alphaproteobacteria	183	10	319	19	13	27	65	14	17	44	40	12	7	1	37	41	1	82	2	32	6	0	32	23	77	9	20	10	39	55	0	16	76	219	0	5	4	1	1	21	2	14	1	1	1	98	7	21	5
Bacteria;Proteobacteria;Betaproteobacteria	251	9	336	18	13	32	159	17	28	18	110	19	17	4	122	87	4	226	3	18	0	0	0	0	0	9	15	9	22	72	1	63	100	296	30	29	18	47	45	131	6	120	9	31	14	151	12	86	34
Bacteria;Proteobacteria;Deltaproteobacteria	2597	1142	1885	410	438	8179	5144	4574	9434	6260	1542	320	256	221	1067	1032	77	1451	116	407	114	33	23	32	70	44	190	233	141	218	0	16	0	115	3	272	173	81	197	584	180	1303	429	500	392	2391	322	900	569
Bacteria;Proteobacteria;Epsilonproteobacteria	181	6	179	7	16	44	270	10	7	16	73	20	2	7	68	85	0	107	1	15	353	2	8	6	468	255	939	194	1752	4546	2	43	1127	2635	3	75	1	27	1	135	1	77	0	13	5	69	27	91	24
Bacteria;Proteobacteria;Gammaproteobacteria	229	23	84	3	23	180	223	184	283	686	94	34	28	38	104	37	293	52	7	61	111	3358	107	121	82	27	51	181	608	91	285	104	238	391	56	37	202	70	424	69	5	5	21	101	159	92	64	107	7
Bacteria;Proteobacteria;Other	37	13	17	3	1	98	15	18	17	85	11	1	39	16	18	45	7	17	18	23	0	0	0	0	1	0	1	0	0	0	2	0	0	0	0	3	9	2	6	9	2	2	49	56	51	14	8	14	15
Bacteria;Spirochaetes;Spirochaetia	139	1	72	1	15	0	0	1	0	0	36	31	12	19	27	193	3	28	4	254	0	0	0	2	0	0	0	0	0	0	0	0	0	0	0	0	0	0	0	0	26	211	2	2	1	15	3	12	0
Bacteria;Synergistetes;Synergistia	6355	26333	4047	24805	9242	9798	4979	16008	16125	14723	2580	2257	11360	8091	1608	4230	18829	1975	11080	6517	5	10	2	30	9	46	82	32	19	10	0	17	2	1	1	40	11	36	36	39	6007	1445	10882	5481	7418	3000	11277	5068	4774
Bacteria;Tenericutes;Mollicutes	0	0	5	0	0	2	1	5	0	0	3	1	1	1	1	0	0	1	1	0	31	0	9	0	20	1	19	19	1	27	0	16	30	63	0	4	0	13	0	13	0	0	1	3	4	6	4	1	0
Bacteria;Verrucomicrobia;Opitutae	0	0	0	0	1	1	1	0	0	3	1	0	3	0	5	5	0	2	0	1	0	0	0	0	0	0	0	0	0	0	0	0	0	0	0	0	0	0	0	0	0	3	0	0	0	0	0	1	0
Bacteria;Verrucomicrobia;Other	19	0	140	2	0	132	250	29	74	41	125	0	1	2	61	103	0	174	1	84	0	0	0	0	0	0	0	0	0	0	0	0	0	0	1	0	0	0	0	0	2	28	1	9	12	58	5	17	19
Bacteria;Verrucomicrobia;Verrucomicrobiae	19	10	3	47	58	365	40	6053	1685	4520	13	25	533	227	8	0	39	5	170	99	0	0	0	0	0	0	0	0	0	0	0	0	0	2	6	23	14	5	0	26	32	2	11	70	34	88	529	21	169
[truncated: 11 more columns]

## Sheet: Order
Taxonomy	Adult1	Adult2	Adult3	Adult4	Adult5	Adult6	Adult7	Adult8	Adult9	Adult10	Adult11	Adult12	Adult13	Adult14	Adult15	Adult16	Adult17	Adult18	Adult19	Adult20	Young1	Young2	Young3	Young4	Young5	Young6	Young7	Young8	Young9	Young10	Young11	Young12	Young13	Young14	Young15	Young16	Young17	Young18	Young19	Young20	Young_FMT1	Young_FMT2	Young_FMT3	Young_FMT4	Young_FMT5	Young_FMT6	Young_FMT7	Young_FMT8	Young_FMT9
Archaea;Euryarchaeota;Methanobacteria;Methanobacteriales	0	0	0	0	1	0	0	1	0	3	1	0	1	1	0	0	0	1	1	1	0	0	0	0	0	0	0	0	0	0	0	0	0	0	0	1	0	0	0	0	1	1	4	1	1	1	1	1	1
Archaea;Euryarchaeota;Methanomicrobia;Methanomicrobiales	0	0	0	0	0	0	0	0	0	0	0	0	0	0	0	0	0	0	0	0	0	0	0	0	0	0	0	0	0	0	0	0	0	0	0	0	0	0	0	0	0	0	0	0	0	0	0	0	0
Bacteria;Actinobacteria;Actinobacteria;Actinomycetales	0	0	1	1	0	2	1	7	6	0	1	1	0	0	2	0	0	0	1	0	4	7	1	2	6	0	2	1	0	1	1	0	1	7	0	0	0	0	0	0	2	0	1	1	0	0	0	0	0
Bacteria;Actinobacteria;Actinobacteria;Bifidobacteriales	0	0	0	0	1	0	0	0	0	0	0	0	0	0	0	1	0	0	0	0	0	0	0	0	0	0	0	0	0	0	0	0	0	1	0	25	331	438	26	33	0	0	0	0	4	0	0	0	0
Bacteria;Actinobacteria;Actinobacteria;Coriobacteriales	164	492	156	658	541	1481	617	1043	1652	2652	363	879	1541	442	216	289	734	138	705	1309	167	193	108	54	108	34	46	420	105	70	72	20	8	71	112	704	811	1051	174	519	598	628	655	463	245	74	363	190	373
Bacteria;Bacteroidetes;Bacteroidia;Bacteroidales	15051	1092	17817	1031	1552	2243	7591	1164	2149	377	16654	12921	834	2167	11866	12512	188	17254	111	4551	8844	79	6153	458	20801	2032	4359	1296	8230	14462	46	8887	3792	7789	239	5696	1598	6507	1324	5908	507	20149	159	1134	448	18036	1447	11316	3297
Bacteria;Bacteroidetes;Flavobacteriia;Flavobacteriales	32	3	20	4	0	7	48	2	10	4	12	0	0	14	0	33	0	105	0	29	0	0	0	0	0	0	0	0	0	0	0	0	0	0	0	0	0	0	0	0	4	8	0	3	0	34	14	6	4
Bacteria;Bacteroidetes;Other;Other	235	54	714	99	39	86	67	60	26	17	1398	284	42	188	978	643	7	1218	0	568	5	0	17	0	67	0	0	0	0	0	0	0	0	0	0	246	37	161	47	242	26	767	9	156	17	263	117	378	132
Bacteria;Candidatus_Saccharibacteria;Unclassified;Unclassified	0	0	2	2	0	583	4	153	82	31	0	9	33	18	3	12	104	0	14	155	0	2	1	0	1	0	0	0	0	0	0	0	0	0	0	0	0	0	0	0	4	15	31	1	1	0	20	7	44
Bacteria;Deferribacteres;Deferribacteres;Deferribacterales	266	15	602	15	8	21	158	2	23	35	152	35	3	18	174	117	1	94	1	20	0	0	0	0	0	0	0	0	0	0	0	0	0	0	0	0	0	0	0	0	9	156	0	3	4	164	30	50	15
Bacteria;Deinococcus-Thermus;Deinococci;Thermales	0	0	0	0	0	8	3	11	14	31	0	0	0	0	0	0	0	0	0	0	0	0	0	0	0	0	0	0	0	0	0	0	0	0	0	0	0	0	0	0	0	0	0	0	0	0	0	0	0
Bacteria;Elusimicrobia;Elusimicrobia;Elusimicrobiales	78	6	37	6	4	8	51	9	11	4	190	5	8	1	117	60	1	127	2	10	0	0	0	0	1	0	0	0	0	0	0	0	0	0	0	0	0	0	0	0	4	141	2	2	2	177	9	33	22
Bacteria;Firmicutes;Bacilli;Bacillales	2	13	0	0	4	10	2	0	3	1	1	1	1	0	17	1	2	4	4	7	11	52	10	47	15	3	21	12	33	22	60	36	120	126	97	5	14	7	7	8	22	3	1	4	12	4	29	12	0
Bacteria;Firmicutes;Bacilli;Lactobacillales	40	18	50	36	41	808	421	347	1637	2299	62	140	212	139	70	71	19	119	122	120	780	355	297	189	516	185	463	179	949	255	129	500	270	386	191	204	398	344	332	155	155	96	84	228	182	43	81	45	140
Bacteria;Firmicutes;Clostridia;Clostridiales	9437	20387	8789	22299	27598	15122	14084	13629	10808	13612	10921	20694	27728	28047	16354	19394	20158	11767	30849	25461	25805	41908	34136	41497	22333	32705	41397	35609	28691	22300	40796	29952	37552	28606	42025	36852	40936	34325	41678	35570	27859	10166	24030	32383	29865	10700	29192	19602	27671
Bacteria;Firmicutes;Clostridia;Other	5	44	4	29	20	54	28	135	80	34	7	74	66	53	13	27	55	7	47	52	0	0	0	1	1	4	3	10	0	0	0	0	0	0	0	16	6	16	6	9	30	5	66	33	26	2	50	34	29
Bacteria;Firmicutes;Erysipelotrichia;Erysipelotrichales	49	26	70	171	124	117	164	113	91	213	81	139	122	188	46	53	75	55	91	88	1139	3110	3862	654	968	289	194	363	506	378	304	457	331	191	1019	238	325	303	534	330	121	66	50	166	92	26	202	32	59
Bacteria;Firmicutes;Negativicutes;Selenomonadales	3010	4022	3689	918	5431	7904	9860	3435	4362	2660	3512	2798	451	435	1107	1117	273	1238	670	637	8157	520	37	1329	1348	7458	5058	4504	4825	2491	895	81	215	2291	386	729	352	1153	561	1362	916	1209	1021	2520	1573	2091	881	3472	973
Bacteria;Firmicutes;Other;Other	354	575	341	561	393	460	386	831	883	742	334	525	877	585	457	416	795	610	1283	524	445	66	330	745	363	131	118	234	40	90	463	412	250	74	370	173	244	299	406	370	787	395	1236	1103	1486	514	475	632	623
Bacteria;Fusobacteria;Fusobacteriia;Fusobacteriales	53	6	43	1	4	8	200	0	0	0	442	15	2	11	619	118	3	145	8	14	0	0	0	0	0	0	0	0	0	0	0	0	0	0	0	0	0	0	0	0	0	183	0	0	2	301	1	142	38
Bacteria;Lentisphaerae;Lentisphaeria;Victivallales	32	0	7	5	0	0	15	1	1	0	9	0	0	0	3	10	0	20	0	0	0	0	0	0	2	0	0	0	0	0	0	16	4	8	0	0	0	1	0	1	0	9	0	1	0	7	0	2	1
Bacteria;Other;Other;Other	2348	3504	765	1203	1829	833	414	598	948	848	790	1974	3250	4659	1590	903	4591	888	2406	2000	82	72	72	92	85	129	128	114	128	133	144	176	273	136	236	156	554	645	496	643	5643	1061	3923	728	1539	1695	2477	2675	2197
Bacteria;Proteobacteria;Alphaproteobacteria;Other	44	4	46	8	1	0	7	0	2	4	24	8	0	0	9	0	0	23	0	14	0	0	0	0	0	0	0	0	0	0	0	0	0	0	0	0	0	0	0	0	0	1	0	0	0	35	3	3	2
Bacteria;Proteobacteria;Alphaproteobacteria;Rhizobiales	0	2	3	2	1	1	2	2	0	2	0	0	0	0	0	0	0	0	1	6	0	0	0	0	12	0	0	0	0	0	0	0	0	0	0	0	0	0	0	1	0	0	0	0	0	1	0	0	0
Bacteria;Proteobacteria;Alphaproteobacteria;Rhodospirillales	139	4	270	9	11	26	56	12	15	38	16	4	7	1	28	41	1	59	1	12	6	0	32	23	65	9	20	10	39	55	0	16	76	219	0	5	4	1	1	20	2	13	1	1	1	62	4	18	3
Bacteria;Proteobacteria;Betaproteobacteria;Burkholderiales	251	8	335	18	13	31	159	17	28	18	103	18	17	4	119	86	4	226	3	18	0	0	0	0	0	9	15	9	22	72	1	63	100	296	30	29	18	47	45	131	6	118	9	31	14	148	12	85	33
Bacteria;Proteobacteria;Betaproteobacteria;Nitrosomonadales	0	1	1	0	0	1	0	0	0	0	7	1	0	0	3	1	0	0	0	0	0	0	0	0	0	0	0	0	0	0	0	0	0	0	0	0	0	0	0	0	0	2	0	0	0	3	0	1	1
Bacteria;Proteobacteria;Deltaproteobacteria;Bdellovibrionales	0	0	4	0	0	0	8	0	0	0	1	0	1	0	1	0	1	0	0	1	0	0	0	0	0	0	0	0	0	0	0	0	0	0	0	0	0	0	0	0	0	0	0	0	0	0	0	0	0
Bacteria;Proteobacteria;Deltaproteobacteria;Desulfovibrionales	739	1018	923	303	341	8046	4539	4187	9195	5916	1290	293	60	96	889	866	18	1034	28	273	67	5	14	7	46	43	179	101	114	209	0	16	0	115	3	157	72	68	151	375	126	1277	87	313	262	1541	94	772	395
Bacteria;Proteobacteria;Deltaproteobacteria;Other	1858	124	958	107	97	133	597	387	239	344	251	27	195	125	177	166	58	417	88	133	47	28	9	25	24	1	11	132	27	9	0	0	0	0	0	115	101	13	46	209	54	26	342	187	130	850	228	128	174
Bacteria;Proteobacteria;Epsilonproteobacteria;Campylobacterales	181	6	179	7	16	44	270	10	7	16	73	20	2	7	68	85	0	107	1	15	353	2	8	6	468	255	939	194	1752	4546	2	43	1127	2635	3	75	1	27	1	135	1	77	0	13	5	69	27	91	24
Bacteria;Proteobacteria;Gammaproteobacteria;Aeromonadales	137	20	78	2	7	64	105	38	30	3	56	24	1	7	33	26	0	50	1	15	0	0	0	0	0	0	0	0	0	0	0	0	0	0	0	0	0	0	0	0	2	3	1	14	2	22	4	28	4
Bacteria;Proteobacteria;Gammaproteobacteria;Enterobacteriales	3	1	3	0	2	63	25	57	224	682	8	10	21	31	9	10	293	2	6	43	111	3358	107	121	82	27	51	181	608	91	285	104	238	391	56	36	202	70	424	68	3	0	20	87	157	36	58	13	3
Bacteria;Proteobacteria;Gammaproteobacteria;Other	84	2	0	1	14	53	92	86	28	1	21	0	6	0	59	0	0	0	0	3	0	0	0	0	0	0	0	0	0	0	0	0	0	0	0	0	0	0	0	0	0	0	0	0	0	24	2	64	0
Bacteria;Proteobacteria;Gammaproteobacteria;Pasteurellales	5	0	3	0	0	0	1	3	1	0	9	0	0	0	3	1	0	0	0	0	0	0	0	0	0	0	0	0	0	0	0	0	0	0	0	1	0	0	0	1	0	2	0	0	0	10	0	2	0
Bacteria;Proteobacteria;Other;Other	37	13	17	3	1	98	15	18	17	85	11	1	39	16	18	45	7	17	18	23	0	0	0	0	1	0	1	0	0	0	2	0	0	0	0	3	9	2	6	9	2	2	49	56	51	14	8	14	15
Bacteria;Spirochaetes;Spirochaetia;Spirochaetales	139	1	72	1	15	0	0	1	0	0	36	31	12	19	27	193	3	28	4	254	0	0	0	2	0	0	0	0	0	0	0	0	0	0	0	0	0	0	0	0	26	211	2	2	1	15	3	12	0
Bacteria;Synergistetes;Synergistia;Synergistales	6355	26333	4047	24805	9242	9798	4979	16008	16125	14723	2580	2257	11360	8091	1608	4230	18829	1975	11080	6517	5	10	2	30	9	46	82	32	19	10	0	17	2	1	1	40	11	36	36	39	6007	1445	10882	5481	7418	3000	11277	5068	4774
Bacteria;Tenericutes;Mollicutes;Acholeplasmatales	0	0	3	0	0	0	0	0	0	0	0	0	0	0	0	0	0	0	0	0	0	0	0	0	0	0	0	0	0	0	0	0	0	0	0	0	0	0	0	3	0	0	0	0	0	2	0	1	0
Bacteria;Tenericutes;Mollicutes;Anaeroplasmatales	0	0	0	0	0	0	0	0	0	0	1	1	0	0	0	0	0	0	0	0	27	0	9	0	6	1	19	19	1	27	0	16	30	63	0	4	0	13	0	10	0	0	0	0	0	0	0	0	0
Bacteria;Tenericutes;Mollicutes;Mycoplasmatales	0	0	0	0	0	0	0	0	0	0	0	0	0	0	0	0	0	0	0	0	4	0	0	0	14	0	0	0	0	0	0	0	0	0	0	0	0	0	0	0	0	0	0	0	0	0	0	0	0
Bacteria;Tenericutes;Mollicutes;Other	0	0	2	0	0	2	1	5	0	0	2	0	1	1	1	0	0	1	1	0	0	0	0	0	0	0	0	0	0	0	0	0	0	0	0	0	0	0	0	0	0	0	1	3	4	4	4	0	0
Bacteria;Verrucomicrobia;Opitutae;Puniceicoccales	0	0	0	0	1	1	1	0	0	3	1	0	3	0	5	5	0	2	0	1	0	0	0	0	0	0	0	0	0	0	0	0	0	0	0	0	0	0	0	0	0	3	0	0	0	0	0	1	0
Bacteria;Verrucomicrobia;Other;Other	19	0	140	2	0	132	250	29	74	41	125	0	1	2	61	103	0	174	1	84	0	0	0	0	0	0	0	0	0	0	0	0	0	0	1	0	0	0	0	0	2	28	1	9	12	58	5	17	19
Bacteria;Verrucomicrobia;Verrucomicrobiae;Verrucomicrobiales	19	10	3	47	58	365	40	6053	1685	4520	13	25	533	227	8	0	39	5	170	99	0	0	0	0	0	0	0	0	0	0	0	0	0	2	6	23	14	5	0	26	32	2	11	70	34	88	529	21	169
[truncated: 11 more columns]

## Sheet: Family
Taxonomy	Adult1	Adult2	Adult3	Adult4	Adult5	Adult6	Adult7	Adult8	Adult9	Adult10	Adult11	Adult12	Adult13	Adult14	Adult15	Adult16	Adult17	Adult18	Adult19	Adult20	Young1	Young2	Young3	Young4	Young5	Young6	Young7	Young8	Young9	Young10	Young11	Young12	Young13	Young14	Young15	Young16	Young17	Young18	Young19	Young20	Young_FMT1	Young_FMT2	Young_FMT3	Young_FMT4	Young_FMT5	Young_FMT6	Young_FMT7	Young_FMT8	Young_FMT9
Archaea;Euryarchaeota;Methanobacteria;Methanobacteriales;Methanobacteriaceae	0	0	0	0	1	0	0	1	0	3	1	0	1	1	0	0	0	1	1	1	0	0	0	0	0	0	0	0	0	0	0	0	0	0	0	1	0	0	0	0	1	1	4	1	1	1	1	1	1
Archaea;Euryarchaeota;Methanomicrobia;Methanomicrobiales;Methanocorpusculaceae	0	0	0	0	0	0	0	0	0	0	0	0	0	0	0	0	0	0	0	0	0	0	0	0	0	0	0	0	0	0	0	0	0	0	0	0	0	0	0	0	0	0	0	0	0	0	0	0	0
Bacteria;Actinobacteria;Actinobacteria;Actinomycetales;Actinomycetaceae	0	0	0	0	0	0	0	0	0	0	0	0	0	0	0	0	0	0	0	0	0	0	0	0	0	0	0	0	0	0	0	0	0	0	0	0	0	0	0	0	0	0	0	0	0	0	0	0	0
Bacteria;Actinobacteria;Actinobacteria;Actinomycetales;Brevibacteriaceae	0	0	0	1	0	1	0	0	2	0	1	0	0	0	0	0	0	0	1	0	0	1	1	2	0	0	0	0	0	0	0	0	1	1	0	0	0	0	0	0	0	0	0	0	0	0	0	0	0
Bacteria;Actinobacteria;Actinobacteria;Actinomycetales;Corynebacteriaceae	0	0	0	0	0	1	1	6	2	0	0	1	0	0	2	0	0	0	0	0	4	3	0	0	2	0	2	0	0	1	0	0	0	3	0	0	0	0	0	0	2	0	1	1	0	0	0	0	0
Bacteria;Actinobacteria;Actinobacteria;Actinomycetales;Dermabacteraceae	0	0	1	0	0	0	0	0	2	0	0	0	0	0	0	0	0	0	0	0	0	3	0	0	0	0	0	1	0	0	1	0	0	3	0	0	0	0	0	0	0	0	0	0	0	0	0	0	0
Bacteria;Actinobacteria;Actinobacteria;Actinomycetales;Other	0	0	0	0	0	0	0	1	0	0	0	0	0	0	0	0	0	0	0	0	0	0	0	0	4	0	0	0	0	0	0	0	0	0	0	0	0	0	0	0	0	0	0	0	0	0	0	0	0
Bacteria;Actinobacteria;Actinobacteria;Bifidobacteriales;Bifidobacteriaceae	0	0	0	0	1	0	0	0	0	0	0	0	0	0	0	1	0	0	0	0	0	0	0	0	0	0	0	0	0	0	0	0	0	1	0	25	331	438	26	33	0	0	0	0	4	0	0	0	0
Bacteria;Actinobacteria;Actinobacteria;Coriobacteriales;Coriobacteriaceae	164	492	156	658	541	1481	617	1043	1652	2652	363	879	1541	442	216	289	734	138	705	1309	167	193	108	54	108	34	46	420	105	70	72	20	8	71	112	704	811	1051	174	519	598	628	655	463	245	74	363	190	373
Bacteria;Bacteroidetes;Bacteroidia;Bacteroidales;Bacteroidaceae	10099	642	10866	572	703	561	4155	353	163	206	9860	8127	371	1174	7916	6874	49	10542	29	2172	6188	19	301	192	14849	626	2094	460	5746	11678	23	4269	1074	2884	11	634	162	3636	94	776	236	13452	75	590	200	11813	526	6284	1957
Bacteria;Bacteroidetes;Bacteroidia;Bacteroidales;Other	1340	123	2338	107	376	34	782	113	19	27	1353	2297	139	634	1485	884	22	1098	5	998	0	0	0	0	0	7	30	0	34	3	0	7	0	0	0	49	16	79	6	46	125	1904	12	65	22	1843	163	1973	668
Bacteria;Bacteroidetes;Bacteroidia;Bacteroidales;Porphyromonadaceae	1423	101	1921	98	157	1282	1116	367	1881	92	3601	1611	185	188	1467	3656	68	1760	43	535	292	1	117	44	2575	183	629	110	692	1126	20	3064	2219	4544	26	718	101	891	283	885	80	2134	19	175	161	2507	266	1141	304
Bacteria;Bacteroidetes;Bacteroidia;Bacteroidales;Prevotellaceae	1919	209	2240	234	281	283	1407	304	67	37	1385	584	73	116	589	850	11	3117	26	717	0	0	0	7	0	1	0	0	0	0	0	0	0	0	0	0	0	0	5	0	56	2069	10	268	43	1284	158	1743	296
Bacteria;Bacteroidetes;Bacteroidia;Bacteroidales;Rikenellaceae	270	17	452	20	35	83	131	27	19	15	455	302	66	55	409	248	38	737	8	129	2364	59	5735	215	3377	1215	1606	726	1758	1655	3	1547	499	361	202	4295	1319	1901	936	4201	10	590	43	36	22	589	334	175	72
Bacteria;Bacteroidetes;Flavobacteriia;Flavobacteriales;Other	32	3	20	4	0	7	48	2	10	4	12	0	0	14	0	33	0	105	0	29	0	0	0	0	0	0	0	0	0	0	0	0	0	0	0	0	0	0	0	0	4	8	0	3	0	34	14	6	4
Bacteria;Bacteroidetes;Other;Other;Other	235	54	714	99	39	86	67	60	26	17	1398	284	42	188	978	643	7	1218	0	568	5	0	17	0	67	0	0	0	0	0	0	0	0	0	0	246	37	161	47	242	26	767	9	156	17	263	117	378	132
Bacteria;Candidatus_Saccharibacteria;Unclassified;Unclassified;Unclassified	0	0	2	2	0	583	4	153	82	31	0	9	33	18	3	12	104	0	14	155	0	2	1	0	1	0	0	0	0	0	0	0	0	0	0	0	0	0	0	0	4	15	31	1	1	0	20	7	44
Bacteria;Deferribacteres;Deferribacteres;Deferribacterales;Deferribacteraceae	266	15	602	15	8	21	158	2	23	35	152	35	3	18	174	117	1	94	1	20	0	0	0	0	0	0	0	0	0	0	0	0	0	0	0	0	0	0	0	0	9	156	0	3	4	164	30	50	15
Bacteria;Deinococcus-Thermus;Deinococci;Thermales;Thermaceae	0	0	0	0	0	8	3	11	14	31	0	0	0	0	0	0	0	0	0	0	0	0	0	0	0	0	0	0	0	0	0	0	0	0	0	0	0	0	0	0	0	0	0	0	0	0	0	0	0
Bacteria;Elusimicrobia;Elusimicrobia;Elusimicrobiales;Elusimicrobiaceae	78	6	37	6	4	8	51	9	11	4	190	5	8	1	117	60	1	127	2	10	0	0	0	0	1	0	0	0	0	0	0	0	0	0	0	0	0	0	0	0	4	141	2	2	2	177	9	33	22
Bacteria;Firmicutes;Bacilli;Bacillales;Bacillaceae	2	11	0	0	4	5	0	0	0	0	1	1	1	0	17	1	0	3	1	4	11	52	10	44	11	3	13	11	32	19	57	36	115	121	97	5	14	6	5	8	21	2	0	4	11	4	28	12	0
Bacteria;Firmicutes;Bacilli;Bacillales;Staphylococcaceae	0	2	0	0	0	5	2	0	3	1	0	0	0	0	0	0	2	1	3	3	0	0	0	3	4	0	8	1	1	3	3	0	5	5	0	0	0	1	2	0	1	1	1	0	1	0	1	0	0
Bacteria;Firmicutes;Bacilli;Lactobacillales;Aerococcaceae	0	0	0	0	0	0	0	0	1	0	0	0	0	0	0	0	0	0	0	0	0	0	1	0	0	0	0	0	0	0	0	0	0	0	0	0	0	0	0	0	0	0	0	2	0	0	0	0	0
Bacteria;Firmicutes;Bacilli;Lactobacillales;Enterococcaceae	2	2	3	3	2	20	12	15	195	41	15	30	17	14	8	2	1	5	4	9	16	132	9	5	36	7	147	39	82	12	2	3	3	10	0	40	220	23	56	24	6	6	3	19	11	5	3	1	7
Bacteria;Firmicutes;Bacilli;Lactobacillales;Lactobacillaceae	37	16	47	33	38	730	399	275	866	2189	38	96	194	116	57	66	16	109	105	101	761	220	284	180	477	178	316	140	867	243	127	491	266	376	191	164	178	321	276	131	140	81	54	183	152	36	75	44	129
Bacteria;Firmicutes;Bacilli;Lactobacillales;Streptococcaceae	1	0	0	0	1	58	10	57	575	69	9	14	1	9	5	3	2	5	13	10	3	3	3	4	3	0	0	0	0	0	0	6	1	0	0	0	0	0	0	0	9	9	27	24	19	2	3	0	4
Bacteria;Firmicutes;Clostridia;Clostridiales;Catabacteriaceae	0	1	0	5	1	1	0	1	1	0	0	0	1	0	0	6	2	0	3	4	0	1	4	0	0	0	0	1	1	2	0	0	0	0	0	0	0	0	0	0	1	1	8	0	8	0	3	0	2
Bacteria;Firmicutes;Clostridia;Clostridiales;Christensenellaceae	1	8	2	8	4	2	2	2	4	6	3	13	14	10	6	5	6	2	13	9	9	2	1	6	0	0	2	6	5	1	3	1	3	1	11	10	2	10	6	13	5	5	16	19	12	2	11	3	7
Bacteria;Firmicutes;Clostridia;Clostridiales;Clostridiaceae	0	0	0	0	0	0	0	2	0	0	0	0	0	0	1	0	0	0	0	0	0	0	2	2	0	1	2	3	6	0	1	2	1	2	1	4	1	0	6	2	0	1	1	0	0	1	0	0	0
Bacteria;Firmicutes;Clostridia;Clostridiales;Clostridiales	22	33	14	45	40	66	51	104	87	143	54	44	92	59	27	45	63	36	64	55	13	26	10	12	14	19	11	14	13	15	10	10	18	6	4	15	8	7	3	6	106	37	75	64	84	32	74	94	111
Bacteria;Firmicutes;Clostridia;Clostridiales;Eubacteriaceae	35	127	77	110	218	203	90	154	189	233	108	322	402	225	84	291	314	53	180	144	613	589	262	1260	356	142	93	373	155	126	60	36	84	59	221	146	2894	1373	451	876	154	61	174	198	177	44	693	134	118
Bacteria;Firmicutes;Clostridia;Clostridiales;Lachnospiraceae	1633	3158	1543	4756	3756	6324	4861	5369	4115	6575	2360	5724	9339	7293	2005	4047	6790	2397	8434	5618	8395	12842	17715	14225	8884	8076	5736	8598	5642	4648	11502	5888	7636	7678	11526	7882	12554	10378	12569	7681	4834	1983	7554	11719	8120	1606	6729	3804	5360
Bacteria;Firmicutes;Clostridia;Clostridiales;Other	1106	1640	1508	1539	1444	2060	1263	1851	2355	1883	1778	2401	9832	3820	1818	2216	4713	2252	5690	3992	8301	9873	5665	13748	6276	6679	5631	3465	2217	2198	5865	3433	4902	2912	9275	9879	14900	9281	12891	9437	2270	1403	3856	6137	3677	1204	9867	1283	2951
Bacteria;Firmicutes;Clostridia;Clostridiales;Peptococcaceae	12	9	6	6	8	20	70	34	36	90	22	33	17	9	9	9	3	17	13	27	0	0	0	0	0	0	0	0	0	0	0	0	0	0	0	0	0	0	0	0	17	14	10	37	40	0	7	14	7
Bacteria;Firmicutes;Clostridia;Clostridiales;Peptostreptococcaceae	3	0	1	2	0	24	25	46	61	13	13	38	17	6	5	31	14	11	36	52	0	0	0	0	0	0	0	0	0	0	0	0	0	0	0	0	0	0	0	1	12	36	44	69	24	8	1	21	6
Bacteria;Firmicutes;Clostridia;Clostridiales;Ruminococcaceae	6625	15411	5634	15827	22126	6421	7717	6059	3959	4668	6581	12118	8013	16625	12399	12739	8253	6995	16416	15559	8474	18575	10477	12244	6803	17788	29922	23149	20652	15310	23355	20582	24908	17948	20987	18916	10577	13276	15752	17552	20460	6625	12290	14133	17722	7796	11807	14247	19108
Bacteria;Firmicutes;Clostridia;Clostridiales;Syntrophomonadaceae	0	0	4	1	1	1	5	7	1	1	2	1	1	0	0	5	0	4	0	1	0	0	0	0	0	0	0	0	0	0	0	0	0	0	0	0	0	0	0	2	0	0	2	7	1	7	0	2	1
Bacteria;Firmicutes;Clostridia;Other;Other	5	44	4	29	20	54	28	135	80	34	7	74	66	53	13	27	55	7	47	52	0	0	0	1	1	4	3	10	0	0	0	0	0	0	0	16	6	16	6	9	30	5	66	33	26	2	50	34	29
Bacteria;Firmicutes;Erysipelotrichia;Erysipelotrichales;Erysipelotrichaceae	49	26	70	171	124	117	164	113	91	213	81	139	122	188	46	53	75	55	91	88	1139	3110	3862	654	968	289	194	363	506	378	304	457	331	191	1019	238	325	303	534	330	121	66	50	166	92	26	202	32	59
Bacteria;Firmicutes;Negativicutes;Selenomonadales;Acidaminococcaceae	1723	1104	3037	643	752	834	2285	1095	251	40	1355	1039	169	154	583	934	197	1189	610	561	0	4	0	0	661	1884	1872	2553	1329	2135	895	81	215	2226	385	729	352	1152	561	1362	352	1127	934	2345	1432	1446	473	976	653
Bacteria;Firmicutes;Negativicutes;Selenomonadales;Veillonellaceae	1287	2918	652	275	4679	7070	7575	2340	4111	2620	2157	1759	282	281	524	183	76	49	60	76	8157	516	37	1329	687	5574	3186	1951	3496	356	0	0	0	65	1	0	0	1	0	0	564	82	87	175	141	645	408	2496	320
Bacteria;Firmicutes;Other;Other;Other	354	575	341	561	393	460	386	831	883	742	334	525	877	585	457	416	795	610	1283	524	445	66	330	745	363	131	118	234	40	90	463	412	250	74	370	173	244	299	406	370	787	395	1236	1103	1486	514	475	632	623
Bacteria;Fusobacteria;Fusobacteriia;Fusobacteriales;Fusobacteriaceae	53	6	43	1	4	8	200	0	0	0	442	15	2	11	619	118	3	145	8	14	0	0	0	0	0	0	0	0	0	0	0	0	0	0	0	0	0	0	0	0	0	183	0	0	2	301	1	142	38
Bacteria;Lentisphaerae;Lentisphaeria;Victivallales;Victivallaceae	32	0	7	5	0	0	15	1	1	0	9	0	0	0	3	10	0	20	0	0	0	0	0	0	2	0	0	0	0	0	0	16	4	8	0	0	0	1	0	1	0	9	0	1	0	7	0	2	1
Bacteria;Other;Other;Other;Other	2348	3504	765	1203	1829	833	414	598	948	848	790	1974	3250	4659	1590	903	4591	888	2406	2000	82	72	72	92	85	129	128	114	128	133	144	176	273	136	236	156	554	645	496	643	5643	1061	3923	728	1539	1695	2477	2675	2197
Bacteria;Proteobacteria;Alphaproteobacteria;Other;Other	44	4	46	8	1	0	7	0	2	4	24	8	0	0	9	0	0	23	0	14	0	0	0	0	0	0	0	0	0	0	0	0	0	0	0	0	0	0	0	0	0	1	0	0	0	35	3	3	2
Bacteria;Proteobacteria;Alphaproteobacteria;Rhizobiales;Phyllobacteriaceae	0	2	3	2	1	1	2	2	0	2	0	0	0	0	0	0	0	0	1	6	0	0	0	0	12	0	0	0	0	0	0	0	0	0	0	0	0	0	0	1	0	0	0	0	0	1	0	0	0
Bacteria;Proteobacteria;Alphaproteobacteria;Rhodospirillales;Other	52	1	111	6	6	10	39	11	4	7	9	4	7	0	12	9	1	7	1	4	0	0	0	0	0	0	0	0	0	0	0	0	0	0	0	0	0	0	0	0	0	3	0	0	1	26	0	0	0
Bacteria;Proteobacteria;Alphaproteobacteria;Rhodospirillales;Rhodospirillaceae	87	3	159	3	5	16	17	1	11	31	7	0	0	1	16	32	0	52	0	8	6	0	32	23	65	9	20	10	39	55	0	16	76	219	0	5	4	1	1	20	2	10	1	1	0	36	4	18	3
Bacteria;Proteobacteria;Betaproteobacteria;Burkholderiales;Comamonadaceae	0	0	0	0	0	0	0	0	0	0	1	0	0	0	3	0	0	0	0	0	0	0	0	0	0	0	0	0	0	0	0	0	0	0	0	0	0	0	0	0	0	0	0	0	0	0	0	0	0
Bacteria;Proteobacteria;Betaproteobacteria;Burkholderiales;Oxalobacteraceae	2	0	1	0	0	0	0	0	0	0	4	0	1	0	1	3	1	1	0	0	0	0	0	0	0	0	0	0	0	0	0	0	0	1	0	0	0	0	0	0	1	0	0	1	1	4	0	0	1
Bacteria;Proteobacteria;Betaproteobacteria;Burkholderiales;Sutterellaceae	249	8	334	18	13	31	159	17	28	18	98	18	16	4	115	83	3	225	3	18	0	0	0	0	0	9	15	9	22	72	1	63	100	295	30	29	18	47	45	131	5	118	9	30	13	144	12	85	32
Bacteria;Proteobacteria;Betaproteobacteria;Nitrosomonadales;Nitrosomonadaceae	0	1	1	0	0	1	0	0	0	0	7	1	0	0	3	1	0	0	0	0	0	0	0	0	0	0	0	0	0	0	0	0	0	0	0	0	0	0	0	0	0	2	0	0	0	3	0	1	1
Bacteria;Proteobacteria;Deltaproteobacteria;Bdellovibrionales;Bdellovibrionaceae	0	0	4	0	0	0	8	0	0	0	1	0	1	0	1	0	1	0	0	1	0	0	0	0	0	0	0	0	0	0	0	0	0	0	0	0	0	0	0	0	0	0	0	0	0	0	0	0	0
Bacteria;Proteobacteria;Deltaproteobacteria;Desulfovibrionales;Desulfovibrionaceae	739	1018	923	303	341	8045	4537	4186	9192	5915	1290	293	60	96	889	866	18	1034	28	273	67	5	14	7	46	43	179	101	114	209	0	16	0	115	3	157	72	68	151	375	126	1277	87	313	262	1540	94	772	395
Bacteria;Proteobacteria;Deltaproteobacteria;Desulfovibrionales;Other	0	0	0	0	0	1	2	1	3	1	0	0	0	0	0	0	0	0	0	0	0	0	0	0	0	0	0	0	0	0	0	0	0	0	0	0	0	0	0	0	0	0	0	0	0	1	0	0	0
Bacteria;Proteobacteria;Deltaproteobacteria;Other;Other	1858	124	958	107	97	133	597	387	239	344	251	27	195	125	177	166	58	417	88	133	47	28	9	25	24	1	11	132	27	9	0	0	0	0	0	115	101	13	46	209	54	26	342	187	130	850	228	128	174
Bacteria;Proteobacteria;Epsilonproteobacteria;Campylobacterales;Campylobacteraceae	91	3	161	4	11	40	221	9	1	2	51	14	2	6	26	13	0	4	0	2	1	1	2	0	14	232	818	184	1636	4356	0	0	0	0	0	52	0	24	1	46	0	32	0	2	1	31	23	7	22
Bacteria;Proteobacteria;Epsilonproteobacteria;Campylobacterales;Helicobacteraceae	90	3	18	3	5	4	49	1	6	14	22	6	0	1	42	72	0	103	1	13	352	1	6	6	454	23	121	10	116	190	2	43	1127	2635	3	23	1	3	0	89	1	45	0	11	4	38	4	84	2
Bacteria;Proteobacteria;Gammaproteobacteria;Aeromonadales;Succinivibrionaceae	137	20	78	2	7	64	105	38	30	3	56	24	1	7	33	26	0	50	1	15	0	0	0	0	0	0	0	0	0	0	0	0	0	0	0	0	0	0	0	0	2	3	1	14	2	22	4	28	4
Bacteria;Proteobacteria;Gammaproteobacteria;Enterobacteriales;Enterobacteriaceae	3	1	3	0	2	63	25	57	224	682	8	10	21	31	9	10	293	2	6	43	111	3358	107	121	82	27	51	181	608	91	285	104	238	391	56	36	202	70	424	68	3	0	20	87	157	36	58	13	3
Bacteria;Proteobacteria;Gammaproteobacteria;Other;Other	84	2	0	1	14	53	92	86	28	1	21	0	6	0	59	0	0	0	0	3	0	0	0	0	0	0	0	0	0	0	0	0	0	0	0	0	0	0	0	0	0	0	0	0	0	24	2	64	0
Bacteria;Proteobacteria;Gammaproteobacteria;Pasteurellales;Pasteurellaceae	5	0	3	0	0	0	1	3	1	0	9	0	0	0	3	1	0	0	0	0	0	0	0	0	0	0	0	0	0	0	0	0	0	0	0	1	0	0	0	1	0	2	0	0	0	10	0	2	0
Bacteria;Proteobacteria;Other;Other;Other	37	13	17	3	1	98	15	18	17	85	11	1	39	16	18	45	7	17	18	23	0	0	0	0	1	0	1	0	0	0	2	0	0	0	0	3	9	2	6	9	2	2	49	56	51	14	8	14	15
Bacteria;Spirochaetes;Spirochaetia;Spirochaetales;Brachyspiraceae	0	0	0	0	5	0	0	0	0	0	0	0	0	0	0	0	0	0	0	0	0	0	0	0	0	0	0	0	0	0	0	0	0	0	0	0	0	0	0	0	0	0	0	0	0	0	0	0	0
Bacteria;Spirochaetes;Spirochaetia;Spirochaetales;Spirochaetaceae	139	1	72	1	10	0	0	1	0	0	36	31	12	19	27	193	3	28	4	254	0	0	0	2	0	0	0	0	0	0	0	0	0	0	0	0	0	0	0	0	26	211	2	2	1	15	3	12	0
Bacteria;Synergistetes;Synergistia;Synergistales;Synergistaceae	6355	26333	4047	24805	9242	9798	4979	16008	16125	14723	2580	2257	11360	8091	1608	4230	18829	1975	11080	6517	5	10	2	30	9	46	82	32	19	10	0	17	2	1	1	40	11	36	36	39	6007	1445	10882	5481	7418	3000	11277	5068	4774
Bacteria;Tenericutes;Mollicutes;Acholeplasmatales;Acholeplasmataceae	0	0	3	0	0	0	0	0	0	0	0	0	0	0	0	0	0	0	0	0	0	0	0	0	0	0	0	0	0	0	0	0	0	0	0	0	0	0	0	3	0	0	0	0	0	2	0	1	0
Bacteria;Tenericutes;Mollicutes;Anaeroplasmatales;Anaeroplasmataceae	0	0	0	0	0	0	0	0	0	0	1	1	0	0	0	0	0	0	0	0	27	0	9	0	6	1	19	19	1	27	0	16	30	63	0	4	0	13	0	10	0	0	0	0	0	0	0	0	0
Bacteria;Tenericutes;Mollicutes;Mycoplasmatales;Mycoplasmataceae	0	0	0	0	0	0	0	0	0	0	0	0	0	0	0	0	0	0	0	0	4	0	0	0	14	0	0	0	0	0	0	0	0	0	0	0	0	0	0	0	0	0	0	0	0	0	0	0	0
Bacteria;Tenericutes;Mollicutes;Other;Other	0	0	2	0	0	2	1	5	0	0	2	0	1	1	1	0	0	1	1	0	0	0	0	0	0	0	0	0	0	0	0	0	0	0	0	0	0	0	0	0	0	0	1	3	4	4	4	0	0
Bacteria;Verrucomicrobia;Opitutae;Puniceicoccales;Puniceicoccaceae	0	0	0	0	1	1	1	0	0	3	1	0	3	0	5	5	0	2	0	1	0	0	0	0	0	0	0	0	0	0	0	0	0	0	0	0	0	0	0	0	0	3	0	0	0	0	0	1	0
Bacteria;Verrucomicrobia;Other;Other;Other	19	0	140	2	0	132	250	29	74	41	125	0	1	2	61	103	0	174	1	84	0	0	0	0	0	0	0	0	0	0	0	0	0	0	1	0	0	0	0	0	2	28	1	9	12	58	5	17	19
Bacteria;Verrucomicrobia;Verrucomicrobiae;Verrucomicrobiales;Verrucomicrobiaceae	19	10	3	47	58	365	40	6053	1685	4520	13	25	533	227	8	0	39	5	170	99	0	0	0	0	0	0	0	0	0	0	0	0	0	2	6	23	14	5	0	26	32	2	11	70	34	88	529	21	169
[truncated: 11 more columns]

## Sheet: Genus
Taxonomy	Adult1	Adult2	Adult3	Adult4	Adult5	Adult6	Adult7	Adult8	Adult9	Adult10	Adult11	Adult12	Adult13	Adult14	Adult15	Adult16	Adult17	Adult18	Adult19	Adult20	Young1	Young2	Young3	Young4	Young5	Young6	Young7	Young8	Young9	Young10	Young11	Young12	Young13	Young14	Young15	Young16	Young17	Young18	Young19	Young20	Young_FMT1	Young_FMT2	Young_FMT3	Young_FMT4	Young_FMT5	Young_FMT6	Young_FMT7	Young_FMT8	Young_FMT9
Archaea;Euryarchaeota;Methanobacteria;Methanobacteriales;Methanobacteriaceae;Methanobrevibacter	0	0	0	0	1	0	0	1	0	3	1	0	1	1	0	0	0	1	1	1	0	0	0	0	0	0	0	0	0	0	0	0	0	0	0	1	0	0	0	0	1	1	4	1	1	1	1	1	1
Archaea;Euryarchaeota;Methanomicrobia;Methanomicrobiales;Methanocorpusculaceae;Methanocorpusculum	0	0	0	0	0	0	0	0	0	0	0	0	0	0	0	0	0	0	0	0	0	0	0	0	0	0	0	0	0	0	0	0	0	0	0	0	0	0	0	0	0	0	0	0	0	0	0	0	0
Bacteria;Actinobacteria;Actinobacteria;Actinomycetales;Actinomycetaceae;Actinomyces	0	0	0	0	0	0	0	0	0	0	0	0	0	0	0	0	0	0	0	0	0	0	0	0	0	0	0	0	0	0	0	0	0	0	0	0	0	0	0	0	0	0	0	0	0	0	0	0	0
Bacteria;Actinobacteria;Actinobacteria;Actinomycetales;Brevibacteriaceae;Brevibacterium	0	0	0	1	0	1	0	0	2	0	1	0	0	0	0	0	0	0	1	0	0	1	1	2	0	0	0	0	0	0	0	0	1	1	0	0	0	0	0	0	0	0	0	0	0	0	0	0	0
Bacteria;Actinobacteria;Actinobacteria;Actinomycetales;Corynebacteriaceae;Corynebacterium	0	0	0	0	0	1	1	6	2	0	0	1	0	0	2	0	0	0	0	0	4	3	0	0	2	0	2	0	0	1	0	0	0	3	0	0	0	0	0	0	2	0	1	1	0	0	0	0	0
Bacteria;Actinobacteria;Actinobacteria;Actinomycetales;Dermabacteraceae;Brachybacterium	0	0	1	0	0	0	0	0	2	0	0	0	0	0	0	0	0	0	0	0	0	3	0	0	0	0	0	1	0	0	1	0	0	3	0	0	0	0	0	0	0	0	0	0	0	0	0	0	0
Bacteria;Actinobacteria;Actinobacteria;Actinomycetales;Other;Other	0	0	0	0	0	0	0	1	0	0	0	0	0	0	0	0	0	0	0	0	0	0	0	0	4	0	0	0	0	0	0	0	0	0	0	0	0	0	0	0	0	0	0	0	0	0	0	0	0
Bacteria;Actinobacteria;Actinobacteria;Bifidobacteriales;Bifidobacteriaceae;Aeriscardovia	0	0	0	0	1	0	0	0	0	0	0	0	0	0	0	1	0	0	0	0	0	0	0	0	0	0	0	0	0	0	0	0	0	0	0	0	0	0	0	0	0	0	0	0	0	0	0	0	0
Bacteria;Actinobacteria;Actinobacteria;Bifidobacteriales;Bifidobacteriaceae;Bifidobacterium	0	0	0	0	0	0	0	0	0	0	0	0	0	0	0	0	0	0	0	0	0	0	0	0	0	0	0	0	0	0	0	0	0	1	0	25	331	438	26	33	0	0	0	0	4	0	0	0	0
Bacteria;Actinobacteria;Actinobacteria;Coriobacteriales;Coriobacteriaceae;Adlercreutzia	5	37	0	14	18	2	3	5	0	3	0	8	7	7	2	4	5	1	9	5	0	0	0	0	0	0	0	0	0	0	0	0	0	0	0	0	0	0	0	0	5	1	2	22	4	1	5	1	3
Bacteria;Actinobacteria;Actinobacteria;Coriobacteriales;Coriobacteriaceae;Collinsella	33	122	37	162	143	233	160	253	299	817	55	137	93	76	49	29	73	12	67	112	0	0	0	0	0	6	0	18	26	27	1	0	0	46	8	614	712	939	108	467	54	52	79	35	29	9	100	20	45
Bacteria;Actinobacteria;Actinobacteria;Coriobacteriales;Coriobacteriaceae;Eggerthella	0	0	0	0	0	0	0	0	0	0	0	0	0	0	0	0	0	0	0	0	126	143	79	33	79	21	37	359	69	39	61	13	3	15	32	64	66	47	44	40	0	0	0	0	0	0	1	0	0
Bacteria;Actinobacteria;Actinobacteria;Coriobacteriales;Coriobacteriaceae;Enterorhabdus	0	0	0	0	0	1	0	1	2	2	0	0	0	0	0	0	0	0	0	0	12	10	6	2	1	1	3	11	2	1	0	1	0	0	0	3	0	0	4	0	0	0	1	0	0	0	0	0	0
Bacteria;Actinobacteria;Actinobacteria;Coriobacteriales;Coriobacteriaceae;Gordonibacter	0	0	0	0	0	0	0	0	0	0	0	0	0	0	0	0	0	0	0	0	4	5	6	2	3	4	2	7	5	1	1	0	0	0	8	16	15	2	8	3	0	0	0	0	0	0	0	0	0
Bacteria;Actinobacteria;Actinobacteria;Coriobacteriales;Coriobacteriaceae;Olsenella	92	189	72	388	282	816	284	462	752	914	252	625	1251	252	101	189	569	95	457	1060	0	0	0	0	1	0	0	0	0	0	0	0	0	0	51	0	4	44	0	4	413	518	397	338	144	40	181	133	257
Bacteria;Actinobacteria;Actinobacteria;Coriobacteriales;Coriobacteriaceae;Other	28	137	36	85	85	413	162	310	572	889	50	101	176	94	58	65	71	30	151	128	25	35	17	17	24	2	4	25	3	2	9	6	5	8	12	7	9	12	5	5	104	46	153	68	66	24	70	36	67
Bacteria;Actinobacteria;Actinobacteria;Coriobacteriales;Coriobacteriaceae;Paraeggerthella	0	0	0	0	0	0	0	0	2	0	0	0	0	0	0	0	0	0	0	0	0	0	0	0	0	0	0	0	0	0	0	0	0	0	0	0	0	0	0	0	0	0	0	0	0	0	0	0	0
Bacteria;Actinobacteria;Actinobacteria;Coriobacteriales;Coriobacteriaceae;Slackia	6	7	11	9	13	16	8	12	25	27	6	8	14	13	6	2	16	0	21	4	0	0	0	0	0	0	0	0	0	0	0	0	0	2	1	0	5	7	5	0	22	11	23	0	2	0	6	0	1
Bacteria;Bacteroidetes;Bacteroidia;Bacteroidales;Bacteroidaceae;Anaerorhabdus	5	2	3	2	9	1	13	3	1	1	2	3	12	9	2	4	8	4	3	2	0	0	0	0	0	0	0	0	0	0	0	0	0	0	0	0	0	0	0	0	3	0	14	0	0	0	3	0	2
Bacteria;Bacteroidetes;Bacteroidia;Bacteroidales;Bacteroidaceae;Bacteroides	10094	640	10863	570	694	560	4142	350	162	205	9858	8124	359	1165	7914	6870	41	10538	26	2170	6188	19	301	192	14849	626	2094	460	5746	11678	23	4269	1074	2884	11	634	162	3636	94	776	233	13452	61	590	200	11813	523	6284	1955
Bacteria;Bacteroidetes;Bacteroidia;Bacteroidales;Other;Other	1340	123	2338	107	376	34	782	113	19	27	1353	2297	139	634	1485	884	22	1098	5	998	0	0	0	0	0	7	30	0	34	3	0	7	0	0	0	49	16	79	6	46	125	1904	12	65	22	1843	163	1973	668
Bacteria;Bacteroidetes;Bacteroidia;Bacteroidales;Porphyromonadaceae;Barnesiella	81	6	81	8	14	37	51	16	9	5	192	1161	54	9	151	86	21	210	14	21	0	0	0	1	864	4	2	1	5	16	16	2281	1115	3852	19	339	19	608	189	509	3	255	6	13	11	243	106	58	37
Bacteria;Bacteroidetes;Bacteroidia;Bacteroidales;Porphyromonadaceae;Butyricimonas	180	4	321	2	9	9	120	4	3	4	84	122	8	12	131	42	2	90	0	41	2	0	19	15	114	4	37	7	124	198	0	39	9	10	0	3	0	4	1	12	1	177	0	0	2	152	29	35	14
Bacteria;Bacteroidetes;Bacteroidia;Bacteroidales;Porphyromonadaceae;Coprobacter	112	10	86	18	3	21	38	6	6	1	73	7	5	5	102	23	3	62	1	54	105	1	40	12	324	21	108	28	111	382	1	3	51	273	0	96	13	73	11	139	2	101	0	8	5	38	18	68	33
Bacteria;Bacteroidetes;Bacteroidia;Bacteroidales;Porphyromonadaceae;Odoribacter	391	24	391	6	38	11	204	27	3	5	129	45	10	50	79	78	2	191	0	118	89	0	0	0	827	0	0	0	1	0	0	0	0	0	0	0	0	0	0	0	5	161	0	9	4	240	46	137	24
Bacteria;Bacteroidetes;Bacteroidia;Bacteroidales;Porphyromonadaceae;Other	347	30	602	37	42	1098	442	275	1809	46	997	113	60	51	341	3100	33	580	21	147	7	0	3	8	54	22	73	22	92	164	0	75	76	125	1	6	3	18	5	10	49	680	3	65	81	1095	25	328	53
Bacteria;Bacteroidetes;Bacteroidia;Bacteroidales;Porphyromonadaceae;Parabacteroides	312	27	440	27	51	106	261	39	51	31	2126	163	48	61	663	327	7	627	7	154	89	0	55	8	392	132	409	52	359	366	3	666	968	284	6	274	66	188	77	215	20	760	10	80	58	739	42	515	143
Bacteria;Bacteroidetes;Bacteroidia;Bacteroidales;Prevotellaceae;Other	79	5	124	4	10	4	69	8	1	0	42	140	0	6	29	26	0	248	1	12	0	0	0	3	0	0	0	0	0	0	0	0	0	0	0	0	0	0	0	0	1	127	1	28	8	146	8	19	0
Bacteria;Bacteroidetes;Bacteroidia;Bacteroidales;Prevotellaceae;Paraprevotella	686	50	399	116	112	46	92	20	7	2	454	45	17	37	194	414	0	1287	1	354	0	0	0	0	0	0	0	0	0	0	0	0	0	0	0	0	0	0	0	0	40	460	0	13	4	259	62	612	69
Bacteria;Bacteroidetes;Bacteroidia;Bacteroidales;Prevotellaceae;Prevotella	1154	154	1717	114	159	233	1246	276	59	35	889	399	56	73	366	410	11	1582	24	351	0	0	0	4	0	1	0	0	0	0	0	0	0	0	0	0	0	0	5	0	15	1482	9	227	31	879	88	1112	227
Bacteria;Bacteroidetes;Bacteroidia;Bacteroidales;Rikenellaceae;Alistipes	261	17	447	20	32	83	128	27	19	15	449	231	66	54	407	235	37	703	7	118	2363	59	5734	215	3322	1215	1606	726	1758	1655	3	1547	499	361	202	4295	1319	1900	936	4201	10	559	43	28	21	527	301	164	71
Bacteria;Bacteroidetes;Bacteroidia;Bacteroidales;Rikenellaceae;Other	2	0	4	0	1	0	0	0	0	0	3	68	0	0	0	1	1	24	1	11	0	0	0	0	0	0	0	0	0	0	0	0	0	0	0	0	0	0	0	0	0	22	0	8	0	0	5	1	0
Bacteria;Bacteroidetes;Bacteroidia;Bacteroidales;Rikenellaceae;Rikenella	7	0	1	0	2	0	3	0	0	0	3	3	0	1	2	12	0	10	0	0	1	0	1	0	55	0	0	0	0	0	0	0	0	0	0	0	0	1	0	0	0	9	0	0	1	62	28	10	1
Bacteria;Bacteroidetes;Flavobacteriia;Flavobacteriales;Other;Other	32	3	20	4	0	7	48	2	10	4	12	0	0	14	0	33	0	105	0	29	0	0	0	0	0	0	0	0	0	0	0	0	0	0	0	0	0	0	0	0	4	8	0	3	0	34	14	6	4
Bacteria;Bacteroidetes;Other;Other;Other;Other	235	54	714	99	39	86	67	60	26	17	1398	284	42	188	978	643	7	1218	0	568	5	0	17	0	67	0	0	0	0	0	0	0	0	0	0	246	37	161	47	242	26	767	9	156	17	263	117	378	132
Bacteria;Candidatus_Saccharibacteria;Unclassified;Unclassified;Unclassified;Saccharibacteria	0	0	2	2	0	583	4	153	82	31	0	9	33	18	3	12	104	0	14	155	0	2	1	0	1	0	0	0	0	0	0	0	0	0	0	0	0	0	0	0	4	15	31	1	1	0	20	7	44
Bacteria;Deferribacteres;Deferribacteres;Deferribacterales;Deferribacteraceae;Mucispirillum	266	15	602	15	8	21	158	2	23	35	152	35	3	18	174	117	1	94	1	20	0	0	0	0	0	0	0	0	0	0	0	0	0	0	0	0	0	0	0	0	9	156	0	3	4	164	30	50	15
Bacteria;Deinococcus-Thermus;Deinococci;Thermales;Thermaceae;Thermus	0	0	0	0	0	8	3	11	14	31	0	0	0	0	0	0	0	0	0	0	0	0	0	0	0	0	0	0	0	0	0	0	0	0	0	0	0	0	0	0	0	0	0	0	0	0	0	0	0
Bacteria;Elusimicrobia;Elusimicrobia;Elusimicrobiales;Elusimicrobiaceae;Elusimicrobium	78	6	37	6	4	8	51	9	11	4	190	5	8	1	117	60	1	127	2	10	0	0	0	0	1	0	0	0	0	0	0	0	0	0	0	0	0	0	0	0	4	141	2	2	2	177	9	33	22
Bacteria;Firmicutes;Bacilli;Bacillales;Bacillaceae;Bacillus	2	11	0	0	4	5	0	0	0	0	1	1	1	0	17	1	0	3	1	4	11	52	10	44	11	3	13	11	32	19	57	36	115	121	97	5	14	6	5	8	21	2	0	4	11	4	28	12	0
Bacteria;Firmicutes;Bacilli;Bacillales;Staphylococcaceae;Staphylococcus	0	2	0	0	0	5	2	0	3	1	0	0	0	0	0	0	2	1	3	3	0	0	0	3	4	0	8	1	1	3	3	0	5	5	0	0	0	1	2	0	1	1	1	0	1	0	1	0	0
Bacteria;Firmicutes;Bacilli;Lactobacillales;Aerococcaceae;Facklamia	0	0	0	0	0	0	0	0	1	0	0	0	0	0	0	0	0	0	0	0	0	0	1	0	0	0	0	0	0	0	0	0	0	0	0	0	0	0	0	0	0	0	0	2	0	0	0	0	0
Bacteria;Firmicutes;Bacilli;Lactobacillales;Enterococcaceae;Enterococcus	2	2	3	3	2	20	12	15	195	41	15	30	17	14	8	2	1	5	4	9	16	132	9	5	36	7	147	39	82	12	2	3	3	10	0	40	220	23	56	24	6	6	3	19	11	5	3	1	7
Bacteria;Firmicutes;Bacilli;Lactobacillales;Lactobacillaceae;Lactobacillus	37	16	47	33	38	730	399	275	866	2189	38	96	194	116	57	66	16	109	105	101	761	220	284	180	477	178	316	140	867	243	127	491	266	376	191	164	178	321	276	131	140	81	54	183	152	36	75	44	129
Bacteria;Firmicutes;Bacilli;Lactobacillales;Streptococcaceae;Streptococcus	1	0	0	0	1	58	10	57	575	69	9	14	1	9	5	3	2	5	13	10	3	3	3	4	3	0	0	0	0	0	0	6	1	0	0	0	0	0	0	0	9	9	27	24	19	2	3	0	4
Bacteria;Firmicutes;Clostridia;Clostridiales;Catabacteriaceae;Catabacter	0	1	0	5	1	1	0	1	1	0	0	0	1	0	0	6	2	0	3	4	0	1	4	0	0	0	0	1	1	2	0	0	0	0	0	0	0	0	0	0	1	1	8	0	8	0	3	0	2
Bacteria;Firmicutes;Clostridia;Clostridiales;Christensenellaceae;Christensenella	1	8	2	8	4	2	2	2	4	6	3	13	14	10	6	5	6	2	13	9	9	2	1	6	0	0	2	6	5	1	3	1	3	1	11	10	2	10	6	13	5	5	16	19	12	2	11	3	7
Bacteria;Firmicutes;Clostridia;Clostridiales;Clostridiaceae;Clostridium_sensu_stricto	0	0	0	0	0	0	0	2	0	0	0	0	0	0	1	0	0	0	0	0	0	0	2	2	0	1	2	3	6	0	1	2	1	2	1	4	1	0	6	2	0	1	1	0	0	1	0	0	0
Bacteria;Firmicutes;Clostridia;Clostridiales;Clostridiales;Anaerovorax	3	0	0	4	0	0	0	0	0	0	6	5	17	8	7	9	19	8	12	26	0	0	0	0	0	0	0	0	0	0	0	0	0	0	0	0	0	0	0	0	7	2	24	24	27	3	10	7	33
Bacteria;Firmicutes;Clostridia;Clostridiales;Clostridiales;Mogibacterium	2	5	2	0	2	21	4	15	13	38	4	2	5	10	2	1	3	4	2	5	5	12	6	3	3	4	4	3	3	1	2	1	4	1	3	0	5	2	1	1	9	0	6	4	3	1	10	3	1
Bacteria;Firmicutes;Clostridia;Clostridiales;Clostridiales;Other	17	28	12	41	38	45	47	89	74	105	44	37	70	41	18	35	41	24	50	24	8	14	4	9	11	15	7	11	10	14	8	9	14	5	1	15	3	5	2	5	90	35	45	36	54	28	54	84	77
Bacteria;Firmicutes;Clostridia;Clostridiales;Eubacteriaceae;Anaerofustis	0	0	0	0	0	5	0	1	6	7	0	0	0	0	2	0	0	1	0	1	1	0	3	2	4	2	11	32	10	3	3	0	1	4	0	1	2	1	1	1	1	3	0	2	3	0	1	0	0
Bacteria;Firmicutes;Clostridia;Clostridiales;Eubacteriaceae;Eubacterium	33	127	77	109	217	194	88	150	178	224	107	322	398	224	79	290	308	51	177	141	612	589	259	1258	352	140	82	341	145	123	57	36	83	55	221	145	2892	1372	450	875	153	57	173	194	174	44	691	133	117
Bacteria;Firmicutes;Clostridia;Clostridiales;Eubacteriaceae;Other	2	0	0	1	1	4	2	3	5	2	1	0	4	1	3	1	6	1	3	2	0	0	0	0	0	0	0	0	0	0	0	0	0	0	0	0	0	0	0	0	0	1	1	2	0	0	1	1	1
Bacteria;Firmicutes;Clostridia;Clostridiales;Lachnospiraceae;Anaerostipes	15	1	17	7	5	13	31	9	26	6	27	3	5	10	5	34	3	38	38	12	6	2	4	10	4	2	5	6	7	15	5	59	17	12	16	33	5	68	30	2	10	8	14	47	8	1	0	6	4
Bacteria;Firmicutes;Clostridia;Clostridiales;Lachnospiraceae;Blautia	19	32	28	30	25	192	75	132	53	163	21	65	43	71	23	47	35	31	33	112	650	288	354	150	83	482	250	205	251	68	133	117	146	310	201	635	1255	449	1253	307	73	29	184	91	81	23	56	45	58
Bacteria;Firmicutes;Clostridia;Clostridiales;Lachnospiraceae;Clostridium_XlVa	238	727	126	1175	553	1555	688	1319	1161	2117	234	585	1513	935	145	392	666	250	792	1066	844	1789	990	2725	917	1247	731	1041	314	243	1484	692	1309	719	1390	227	601	649	581	536	360	155	1373	2225	1120	229	755	639	808
Bacteria;Firmicutes;Clostridia;Clostridiales;Lachnospiraceae;Clostridium_XlVb	305	237	236	203	132	108	213	154	70	83	248	344	170	793	352	410	246	330	557	502	267	114	151	334	580	627	1470	1175	910	545	1499	1013	1503	708	1398	267	74	308	234	272	677	156	362	269	504	561	553	931	1043
Bacteria;Firmicutes;Clostridia;Clostridiales;Lachnospiraceae;Coprococcus	2	3	7	2	0	33	40	25	38	78	11	16	22	23	7	24	12	19	52	14	112	48	125	72	31	19	5	116	8	7	9	23	16	5	11	29	106	69	176	94	11	1	21	56	41	1	37	1	8
Bacteria;Firmicutes;Clostridia;Clostridiales;Lachnospiraceae;Lachnospira	0	0	0	1	0	0	0	0	0	0	0	0	0	0	0	0	0	0	0	0	2	0	0	0	0	1	9	1	3	3	17	26	32	25	4	6	0	8	3	1	0	0	0	0	0	0	0	0	0
Bacteria;Firmicutes;Clostridia;Clostridiales;Lachnospiraceae;Other	673	1392	522	1876	1907	2748	2217	2694	1802	3178	678	2162	2836	2751	628	2105	1893	955	2815	2581	2697	4228	3612	4177	2409	2976	1779	2485	1876	993	4598	1894	2519	2925	3068	2019	3351	3767	3874	2245	1982	564	2998	4187	3447	432	2296	1308	1772
Bacteria;Firmicutes;Clostridia;Clostridiales;Lachnospiraceae;Roseburia	17	117	20	193	93	26	14	18	28	33	24	31	66	30	2	42	34	14	41	24	168	181	32	206	100	68	41	82	32	31	53	17	52	34	35	172	113	183	209	167	14	2	36	134	45	12	50	20	35
Bacteria;Firmicutes;Clostridia;Clostridiales;Lachnospiraceae;Ruminococcus2	364	649	587	1269	1041	1649	1583	1018	937	917	1117	2518	4684	2680	843	993	3901	760	4106	1307	3649	6192	12447	6551	4760	2654	1446	3487	2241	2743	3704	2047	2042	2940	5403	4494	7049	4877	6209	4057	1707	1068	2566	4710	2874	347	2982	854	1632
Bacteria;Firmicutes;Clostridia;Clostridiales;Other;Other	1106	1640	1508	1539	1444	2060	1263	1851	2355	1883	1778	2401	9832	3820	1818	2216	4713	2252	5690	3992	8301	9873	5665	13748	6276	6679	5631	3465	2217	2198	5865	3433	4902	2912	9275	9879	14900	9281	12891	9437	2270	1403	3856	6137	3677	1204	9867	1283	2951
Bacteria;Firmicutes;Clostridia;Clostridiales;Peptococcaceae;Peptococcus	12	9	6	6	8	20	70	34	36	90	22	33	17	9	9	9	3	17	13	27	0	0	0	0	0	0	0	0	0	0	0	0	0	0	0	0	0	0	0	0	17	14	10	37	40	0	7	14	7
Bacteria;Firmicutes;Clostridia;Clostridiales;Peptostreptococcaceae;Clostridium_XI	0	0	0	0	0	0	0	0	0	0	0	0	0	0	0	0	0	0	0	0	0	0	0	0	0	0	0	0	0	0	0	0	0	0	0	0	0	0	0	0	0	0	0	0	0	0	0	0	0
Bacteria;Firmicutes;Clostridia;Clostridiales;Peptostreptococcaceae;Peptostreptococcus	0	0	1	0	0	0	0	0	0	0	0	3	0	0	0	0	0	0	0	0	0	0	0	0	0	0	0	0	0	0	0	0	0	0	0	0	0	0	0	0	0	0	0	0	0	0	0	0	0
Bacteria;Firmicutes;Clostridia;Clostridiales;Peptostreptococcaceae;Romboutsia	3	0	0	2	0	24	25	46	61	13	13	35	17	6	5	31	14	11	36	52	0	0	0	0	0	0	0	0	0	0	0	0	0	0	0	0	0	0	0	1	12	36	44	69	24	8	1	21	6
Bacteria;Firmicutes;Clostridia;Clostridiales;Ruminococcaceae;Acetanaerobacterium	19	22	18	18	9	17	20	28	16	13	23	14	1	2	20	28	0	27	4	10	4	0	0	5	15	8	7	29	5	5	1	81	55	19	5	5	2	3	3	10	5	19	12	10	8	28	4	15	29
Bacteria;Firmicutes;Clostridia;Clostridiales;Ruminococcaceae;Anaerofilum	21	63	20	25	39	78	68	115	92	77	33	50	67	65	26	46	92	38	81	59	7	9	2	15	0	10	12	3	9	11	0	3	0	2	3	10	10	5	8	13	68	40	83	114	161	22	61	31	76
Bacteria;Firmicutes;Clostridia;Clostridiales;Ruminococcaceae;Anaerotruncus	44	37	40	33	22	38	79	36	11	4	66	37	2	6	47	64	0	40	1	13	17	2	5	5	68	84	130	192	124	225	9	169	297	111	17	29	5	16	6	81	7	47	5	24	8	60	7	33	38
Bacteria;Firmicutes;Clostridia;Clostridiales;Ruminococcaceae;Butyricicoccus	411	1084	297	1117	779	604	420	387	419	585	238	439	550	641	432	312	538	349	564	382	448	567	237	489	225	295	492	263	314	317	608	364	779	2290	474	292	466	294	448	775	557	319	568	416	669	323	208	326	296
Bacteria;Firmicutes;Clostridia;Clostridiales;Ruminococcaceae;Clostridium_III	11	25	4	33	4	28	11	5	25	54	11	14	31	13	17	16	12	15	26	25	15	16	18	43	9	10	40	67	90	36	5	17	5	3	9	8	4	3	3	5	5	6	19	18	26	5	18	5	12
Bacteria;Firmicutes;Clostridia;Clostridiales;Ruminococcaceae;Clostridium_IV	209	527	184	529	583	272	346	475	156	125	193	514	420	729	162	439	398	224	707	655	484	556	164	1150	385	708	755	1123	548	375	999	479	609	674	1019	414	119	496	614	520	372	197	623	766	826	160	523	368	654
Bacteria;Firmicutes;Clostridia;Clostridiales;Ruminococcaceae;Faecalibacterium	865	3190	432	1650	12868	1062	393	314	310	72	696	1654	653	1220	354	659	575	519	1336	1556	1195	1184	1316	355	784	7230	17957	7931	9775	5832	2716	5846	8483	247	2476	5454	2441	5377	6258	5951	1415	1155	778	432	1388	606	922	2930	4376
Bacteria;Firmicutes;Clostridia;Clostridiales;Ruminococcaceae;Flavonifractor	443	236	409	457	138	97	426	164	50	37	520	413	97	478	888	1197	116	589	681	664	382	15	30	192	468	530	703	390	714	607	1223	916	1044	1372	184	220	30	209	78	207	914	449	561	730	1014	1397	184	1555	942
Bacteria;Firmicutes;Clostridia;Clostridiales;Ruminococcaceae;Gemmiger	22	152	20	29	144	27	22	103	33	39	100	58	137	127	123	34	241	7	107	330	11	149	113	8	14	78	47	346	11	39	368	23	14	7	59	565	393	34	99	207	432	24	174	106	359	35	307	44	31
Bacteria;Firmicutes;Clostridia;Clostridiales;Ruminococcaceae;Hydrogenoanaerobacterium	16	40	14	17	8	10	9	7	4	2	15	8	2	1	27	21	2	32	0	4	1	1	0	4	5	6	2	1	7	5	36	10	14	22	34	2	1	3	0	1	5	26	1	8	7	17	0	13	3
Bacteria;Firmicutes;Clostridia;Clostridiales;Ruminococcaceae;Intestinimonas	128	343	84	253	268	86	114	50	91	189	102	202	105	262	192	248	106	130	165	181	33	153	30	96	21	105	117	174	247	157	154	93	144	112	263	112	18	45	72	88	303	98	158	201	337	102	162	134	212
Bacteria;Firmicutes;Clostridia;Clostridiales;Ruminococcaceae;Oscillibacter	254	137	214	357	104	329	331	272	102	27	348	348	86	453	560	716	111	384	327	472	147	14	43	145	233	284	349	221	190	223	256	228	259	211	192	158	30	152	89	123	775	313	682	616	595	408	218	488	552
Bacteria;Firmicutes;Clostridia;Clostridiales;Ruminococcaceae;Other	3253	8436	3240	7716	5190	3192	4692	3522	2040	1742	3519	6812	4355	11152	7218	7272	5216	3839	10612	9464	4297	7233	4168	7218	2881	5800	7082	10198	4624	4288	8969	10432	10825	11404	13913	9092	5629	5920	5666	7418	12169	3134	7647	9427	10891	3676	7477	6695	9911
Bacteria;Firmicutes;Clostridia;Clostridiales;Ruminococcaceae;Pseudoflavonifractor	483	630	429	707	1367	117	567	223	412	188	401	1002	72	605	1506	472	58	337	215	759	830	2534	801	1404	795	827	678	1517	2287	2262	2250	1141	1906	1053	1136	382	113	189	614	938	1666	504	181	410	478	626	671	685	820
Bacteria;Firmicutes;Clostridia;Clostridiales;Ruminococcaceae;Ruminococcus	53	21	47	76	48	7	33	13	11	4	17	4	20	2	53	56	33	126	4	38	58	67	12	66	54	36	71	42	85	101	118	52	215	50	149	93	33	32	37	80	4	32	24	18	20	46	39	85	20
Bacteria;Firmicutes;Clostridia;Clostridiales;Ruminococcaceae;Sporobacter	374	389	163	2694	496	72	85	62	24	26	230	149	92	519	614	795	99	267	336	427	31	7	9	134	6	1422	1281	267	1352	505	44	463	204	124	377	176	9	119	195	152	704	149	396	689	317	212	396	447	806
Bacteria;Firmicutes;Clostridia;Clostridiales;Ruminococcaceae;Subdoligranulum	19	79	19	116	59	385	101	283	163	1484	69	400	1323	350	160	364	656	72	1250	520	514	6068	3529	915	840	355	199	385	270	322	5599	265	55	247	677	1904	1274	379	1562	983	1059	113	378	148	618	73	610	393	330
Bacteria;Firmicutes;Clostridia;Clostridiales;Syntrophomonadaceae;Syntrophomonas	0	0	4	1	1	1	5	7	1	1	2	1	1	0	0	5	0	4	0	1	0	0	0	0	0	0	0	0	0	0	0	0	0	0	0	0	0	0	0	2	0	0	2	7	1	7	0	2	1
Bacteria;Firmicutes;Clostridia;Other;Other;Other	5	44	4	29	20	54	28	135	80	34	7	74	66	53	13	27	55	7	47	52	0	0	0	1	1	4	3	10	0	0	0	0	0	0	0	16	6	16	6	9	30	5	66	33	26	2	50	34	29
Bacteria;Firmicutes;Erysipelotrichia;Erysipelotrichales;Erysipelotrichaceae;Clostridium_XVIII	12	8	12	63	21	16	17	17	37	23	17	24	37	32	12	9	16	4	29	18	198	204	282	207	188	113	81	163	217	177	89	137	196	103	194	126	182	148	287	176	24	21	19	26	24	9	58	9	11
Bacteria;Firmicutes;Erysipelotrichia;Erysipelotrichales;Erysipelotrichaceae;Faecalicoccus	15	14	19	24	35	60	75	37	18	54	15	56	24	42	18	21	41	16	17	54	163	57	24	165	23	122	46	88	174	53	22	23	47	0	132	29	62	93	122	39	15	20	18	109	10	4	33	15	23
Bacteria;Firmicutes;Erysipelotrichia;Erysipelotrichales;Erysipelotrichaceae;Faecalitalea	2	0	5	0	5	10	43	40	7	115	8	8	5	7	5	5	0	15	12	5	0	0	0	0	0	0	0	0	0	0	0	0	0	0	0	0	9	1	0	1	7	2	3	5	30	4	4	1	1
Bacteria;Firmicutes;Erysipelotrichia;Erysipelotrichales;Erysipelotrichaceae;Holdemania	4	1	2	6	6	4	9	8	10	5	2	13	9	11	4	10	12	4	15	5	15	11	3	20	11	11	19	22	6	13	9	25	21	3	14	10	23	14	21	10	7	3	5	12	9	1	41	7	6
Bacteria;Firmicutes;Erysipelotrichia;Erysipelotrichales;Erysipelotrichaceae;Other	16	3	32	78	57	27	20	11	15	16	39	38	46	96	7	8	6	14	17	5	763	2838	3553	262	746	43	48	90	109	135	184	272	67	85	679	73	49	47	104	104	68	19	2	13	19	7	66	0	18
Bacteria;Firmicutes;Erysipelotrichia;Erysipelotrichales;Erysipelotrichaceae;Turicibacter	0	0	0	0	0	0	0	0	4	0	0	0	1	0	0	0	0	2	1	1	0	0	0	0	0	0	0	0	0	0	0	0	0	0	0	0	0	0	0	0	0	1	3	1	0	1	0	0	0
Bacteria;Firmicutes;Negativicutes;Selenomonadales;Acidaminococcaceae;Other	1688	1104	3037	643	752	834	2285	1095	248	40	1355	1039	169	154	582	934	197	1175	610	519	0	1	0	0	661	1884	1872	2553	1329	2135	895	81	215	2226	385	155	63	1058	357	808	134	1029	933	2256	1432	1432	473	976	648
Bacteria;Firmicutes;Negativicutes;Selenomonadales;Acidaminococcaceae;Phascolarctobacterium	35	0	0	0	0	0	0	0	3	0	0	0	0	0	1	0	0	14	0	42	0	3	0	0	0	0	0	0	0	0	0	0	0	0	0	574	289	94	204	554	218	98	1	89	0	14	0	0	5
Bacteria;Firmicutes;Negativicutes;Selenomonadales;Veillonellaceae;Megamonas	156	945	94	231	3208	5992	2372	1261	1899	1660	1315	757	226	159	364	101	61	5	44	45	8157	516	37	1329	687	5574	3186	1951	3496	356	0	0	0	65	1	0	0	0	0	0	464	53	25	97	5	490	258	1775	312
Bacteria;Firmicutes;Negativicutes;Selenomonadales;Veillonellaceae;Megasphaera	1128	1970	548	43	1467	1078	5073	1065	2203	954	840	998	54	115	156	77	14	44	16	16	0	0	0	0	0	0	0	0	0	0	0	0	0	0	0	0	0	1	0	0	41	2	62	77	136	138	140	720	6
Bacteria;Firmicutes;Negativicutes;Selenomonadales;Veillonellaceae;Veillonella	3	3	10	1	4	0	130	14	9	6	2	4	2	7	4	5	1	0	0	15	0	0	0	0	0	0	0	0	0	0	0	0	0	0	0	0	0	0	0	0	59	27	0	1	0	17	10	1	2
Bacteria;Firmicutes;Other;Other;Other;Other	354	575	341	561	393	460	386	831	883	742	334	525	877	585	457	416	795	610	1283	524	445	66	330	745	363	131	118	234	40	90	463	412	250	74	370	173	244	299	406	370	787	395	1236	1103	1486	514	475	632	623
Bacteria;Fusobacteria;Fusobacteriia;Fusobacteriales;Fusobacteriaceae;Fusobacterium	53	6	43	1	4	8	200	0	0	0	442	15	2	11	619	118	3	145	8	14	0	0	0	0	0	0	0	0	0	0	0	0	0	0	0	0	0	0	0	0	0	183	0	0	2	301	1	142	38
Bacteria;Lentisphaerae;Lentisphaeria;Victivallales;Victivallaceae;Victivallis	32	0	7	5	0	0	15	1	1	0	9	0	0	0	3	10	0	20	0	0	0	0	0	0	2	0	0	0	0	0	0	16	4	8	0	0	0	1	0	1	0	9	0	1	0	7	0	2	1
Bacteria;Other;Other;Other;Other;Other	2348	3504	765	1203	1829	833	414	598	948	848	790	1974	3250	4659	1590	903	4591	888	2406	2000	82	72	72	92	85	129	128	114	128	133	144	176	273	136	236	156	554	645	496	643	5643	1061	3923	728	1539	1695	2477	2675	2197
Bacteria;Proteobacteria;Alphaproteobacteria;Other;Other;Other	44	4	46	8	1	0	7	0	2	4	24	8	0	0	9	0	0	23	0	14	0	0	0	0	0	0	0	0	0	0	0	0	0	0	0	0	0	0	0	0	0	1	0	0	0	35	3	3	2
Bacteria;Proteobacteria;Alphaproteobacteria;Rhizobiales;Phyllobacteriaceae;Phyllobacterium	0	2	3	2	1	1	2	2	0	2	0	0	0	0	0	0	0	0	1	6	0	0	0	0	12	0	0	0	0	0	0	0	0	0	0	0	0	0	0	1	0	0	0	0	0	1	0	0	0
Bacteria;Proteobacteria;Alphaproteobacteria;Rhodospirillales;Other;Other	52	1	111	6	6	10	39	11	4	7	9	4	7	0	12	9	1	7	1	4	0	0	0	0	0	0	0	0	0	0	0	0	0	0	0	0	0	0	0	0	0	3	0	0	1	26	0	0	0
Bacteria;Proteobacteria;Alphaproteobacteria;Rhodospirillales;Rhodospirillaceae;Aestuariispira	0	0	0	0	0	0	0	0	0	0	0	0	0	0	0	4	0	1	0	1	2	0	0	0	56	9	20	10	39	55	0	15	74	149	0	2	0	0	0	0	0	0	0	0	0	0	0	0	0
Bacteria;Proteobacteria;Alphaproteobacteria;Rhodospirillales;Rhodospirillaceae;Other	87	3	159	3	5	16	17	1	11	31	7	0	0	1	16	28	0	51	0	7	4	0	32	23	9	0	0	0	0	0	0	1	2	70	0	3	4	1	1	20	2	10	1	1	0	36	4	18	3
Bacteria;Proteobacteria;Betaproteobacteria;Burkholderiales;Comamonadaceae;Comamonas	0	0	0	0	0	0	0	0	0	0	1	0	0	0	3	0	0	0	0	0	0	0	0	0	0	0	0	0	0	0	0	0	0	0	0	0	0	0	0	0	0	0	0	0	0	0	0	0	0
Bacteria;Proteobacteria;Betaproteobacteria;Burkholderiales;Oxalobacteraceae;Oxalobacter	2	0	1	0	0	0	0	0	0	0	4	0	1	0	1	3	1	1	0	0	0	0	0	0	0	0	0	0	0	0	0	0	0	1	0	0	0	0	0	0	1	0	0	1	1	4	0	0	1
Bacteria;Proteobacteria;Betaproteobacteria;Burkholderiales;Sutterellaceae;Other	28	1	35	0	0	2	34	2	1	5	19	3	0	1	36	19	0	51	1	6	0	0	0	0	0	0	0	0	0	0	0	0	0	0	0	0	0	0	0	0	2	25	0	3	1	20	2	15	4
Bacteria;Proteobacteria;Betaproteobacteria;Burkholderiales;Sutterellaceae;Parasutterella	152	4	223	17	9	29	117	14	22	11	61	11	15	1	58	46	3	137	2	9	0	0	0	0	0	9	15	9	22	72	1	63	100	295	30	29	18	47	45	131	3	77	9	27	12	61	5	40	17
Bacteria;Proteobacteria;Betaproteobacteria;Burkholderiales;Sutterellaceae;Sutterella	69	3	76	1	4	0	8	1	5	2	18	4	1	2	21	18	0	37	0	3	0	0	0	0	0	0	0	0	0	0	0	0	0	0	0	0	0	0	0	0	0	16	0	0	0	63	5	30	11
Bacteria;Proteobacteria;Betaproteobacteria;Nitrosomonadales;Nitrosomonadaceae;Nitrosomonas	0	1	1	0	0	1	0	0	0	0	7	1	0	0	3	1	0	0	0	0	0	0	0	0	0	0	0	0	0	0	0	0	0	0	0	0	0	0	0	0	0	2	0	0	0	3	0	1	1
Bacteria;Proteobacteria;Deltaproteobacteria;Bdellovibrionales;Bdellovibrionaceae;Vampirovibrio	0	0	4	0	0	0	8	0	0	0	1	0	1	0	1	0	1	0	0	1	0	0	0	0	0	0	0	0	0	0	0	0	0	0	0	0	0	0	0	0	0	0	0	0	0	0	0	0	0
Bacteria;Proteobacteria;Deltaproteobacteria;Desulfovibrionales;Desulfovibrionaceae;Bilophila	1	1	2	1	2	0	0	1	1	0	6	1	0	1	2	5	0	9	0	5	67	4	13	7	46	42	179	100	114	200	0	8	0	115	3	45	2	5	12	210	0	8	0	4	4	8	0	2	1
Bacteria;Proteobacteria;Deltaproteobacteria;Desulfovibrionales;Desulfovibrionaceae;Desulfovibrio	737	1017	920	302	339	8045	4537	4185	9191	5915	1284	251	38	82	882	861	18	1025	28	223	0	1	1	0	0	1	0	1	0	9	0	8	0	0	0	112	70	63	139	165	126	1269	87	309	258	1532	94	770	394
Bacteria;Proteobacteria;Deltaproteobacteria;Desulfovibrionales;Desulfovibrionaceae;Lawsonia	1	0	1	0	0	0	0	0	0	0	0	41	22	13	5	0	0	0	0	45	0	0	0	0	0	0	0	0	0	0	0	0	0	0	0	0	0	0	0	0	0	0	0	0	0	0	0	0	0
Bacteria;Proteobacteria;Deltaproteobacteria;Desulfovibrionales;Other;Other	0	0	0	0	0	1	2	1	3	1	0	0	0	0	0	0	0	0	0	0	0	0	0	0	0	0	0	0	0	0	0	0	0	0	0	0	0	0	0	0	0	0	0	0	0	1	0	0	0
Bacteria;Proteobacteria;Deltaproteobacteria;Other;Other;Other	1858	124	958	107	97	133	597	387	239	344	251	27	195	125	177	166	58	417	88	133	47	28	9	25	24	1	11	132	27	9	0	0	0	0	0	115	101	13	46	209	54	26	342	187	130	850	228	128	174
Bacteria;Proteobacteria;Epsilonproteobacteria;Campylobacterales;Campylobacteraceae;Campylobacter	91	3	161	4	11	40	221	9	1	2	51	14	2	6	26	13	0	4	0	2	1	1	2	0	14	232	818	184	1636	4356	0	0	0	0	0	52	0	24	1	46	0	32	0	2	1	31	23	7	22
Bacteria;Proteobacteria;Epsilonproteobacteria;Campylobacterales;Helicobacteraceae;Helicobacter	90	3	18	3	5	4	49	1	6	14	22	6	0	1	42	72	0	103	1	13	352	1	6	6	454	23	121	10	116	190	2	43	1127	2635	3	23	1	3	0	89	1	45	0	11	4	38	4	84	2
Bacteria;Proteobacteria;Gammaproteobacteria;Aeromonadales;Succinivibrionaceae;Anaerobiospirillum	1	17	3	1	0	18	63	16	16	2	25	4	0	6	1	10	0	0	0	4	0	0	0	0	0	0	0	0	0	0	0	0	0	0	0	0	0	0	0	0	2	1	1	0	0	1	0	0	0
Bacteria;Proteobacteria;Gammaproteobacteria;Aeromonadales;Succinivibrionaceae;Succinatimonas	136	3	75	1	7	46	42	22	14	1	31	20	1	1	32	16	0	50	1	11	0	0	0	0	0	0	0	0	0	0	0	0	0	0	0	0	0	0	0	0	0	2	0	14	2	21	4	28	4
Bacteria;Proteobacteria;Gammaproteobacteria;Enterobacteriales;Enterobacteriaceae;Escherichia	3	1	3	0	2	63	25	57	224	682	7	10	21	31	9	10	292	2	6	43	111	3357	107	120	82	27	51	181	608	91	285	104	238	391	56	36	202	70	424	68	3	0	20	87	157	36	58	13	3
Bacteria;Proteobacteria;Gammaproteobacteria;Enterobacteriales;Enterobacteriaceae;Klebsiella	0	0	0	0	0	0	0	0	0	0	1	0	0	0	0	0	1	0	0	0	0	1	0	1	0	0	0	0	0	0	0	0	0	0	0	0	0	0	0	0	0	0	0	0	0	0	0	0	0
Bacteria;Proteobacteria;Gammaproteobacteria;Other;Other;Other	84	2	0	1	14	53	92	86	28	1	21	0	6	0	59	0	0	0	0	3	0	0	0	0	0	0	0	0	0	0	0	0	0	0	0	0	0	0	0	0	0	0	0	0	0	24	2	64	0
Bacteria;Proteobacteria;Gammaproteobacteria;Pasteurellales;Pasteurellaceae;Gallibacterium	5	0	3	0	0	0	1	3	1	0	9	0	0	0	3	1	0	0	0	0	0	0	0	0	0	0	0	0	0	0	0	0	0	0	0	1	0	0	0	1	0	2	0	0	0	10	0	2	0
Bacteria;Proteobacteria;Other;Other;Other;Other	37	13	17	3	1	98	15	18	17	85	11	1	39	16	18	45	7	17	18	23	0	0	0	0	1	0	1	0	0	0	2	0	0	0	0	3	9	2	6	9	2	2	49	56	51	14	8	14	15
Bacteria;Spirochaetes;Spirochaetia;Spirochaetales;Brachyspiraceae;Brachyspira	0	0	0	0	5	0	0	0	0	0	0	0	0	0	0	0	0	0	0	0	0	0	0	0	0	0	0	0	0	0	0	0	0	0	0	0	0	0	0	0	0	0	0	0	0	0	0	0	0
Bacteria;Spirochaetes;Spirochaetia;Spirochaetales;Spirochaetaceae;Sphaerochaeta	139	1	72	0	9	0	0	1	0	0	20	30	10	5	22	142	2	28	0	253	0	0	0	0	0	0	0	0	0	0	0	0	0	0	0	0	0	0	0	0	2	62	1	0	1	15	3	12	0
Bacteria;Spirochaetes;Spirochaetia;Spirochaetales;Spirochaetaceae;Spirochaeta	0	0	0	0	0	0	0	0	0	0	0	0	0	0	0	5	0	0	4	0	0	0	0	0	0	0	0	0	0	0	0	0	0	0	0	0	0	0	0	0	0	9	0	0	0	0	0	0	0
Bacteria;Spirochaetes;Spirochaetia;Spirochaetales;Spirochaetaceae;Treponema	0	0	0	1	1	0	0	0	0	0	16	1	2	14	5	46	1	0	0	1	0	0	0	2	0	0	0	0	0	0	0	0	0	0	0	0	0	0	0	0	24	140	1	2	0	0	0	0	0
Bacteria;Synergistetes;Synergistia;Synergistales;Synergistaceae;Cloacibacillus	6296	26169	4003	24700	9181	9681	4908	15859	15976	14575	2475	2117	11268	7982	1557	4089	18767	1927	10949	6381	0	1	2	0	7	0	1	1	0	1	0	1	1	0	1	0	1	0	0	3	5908	1364	10687	5338	7243	2963	11212	4964	4600
Bacteria;Synergistetes;Synergistia;Synergistales;Synergistaceae;Other	59	164	44	105	61	117	71	149	149	148	105	140	92	109	51	141	62	48	131	136	5	9	0	30	2	46	81	31	19	9	0	16	1	1	0	40	10	36	36	36	99	81	195	143	175	37	65	104	174
Bacteria;Tenericutes;Mollicutes;Acholeplasmatales;Acholeplasmataceae;Acholeplasma	0	0	3	0	0	0	0	0	0	0	0	0	0	0	0	0	0	0	0	0	0	0	0	0	0	0	0	0	0	0	0	0	0	0	0	0	0	0	0	3	0	0	0	0	0	2	0	1	0
Bacteria;Tenericutes;Mollicutes;Anaeroplasmatales;Anaeroplasmataceae;Anaeroplasma	0	0	0	0	0	0	0	0	0	0	1	1	0	0	0	0	0	0	0	0	27	0	9	0	6	1	19	19	1	27	0	16	30	63	0	4	0	13	0	10	0	0	0	0	0	0	0	0	0
Bacteria;Tenericutes;Mollicutes;Mycoplasmatales;Mycoplasmataceae;Ureaplasma	0	0	0	0	0	0	0	0	0	0	0	0	0	0	0	0	0	0	0	0	4	0	0	0	14	0	0	0	0	0	0	0	0	0	0	0	0	0	0	0	0	0	0	0	0	0	0	0	0
Bacteria;Tenericutes;Mollicutes;Other;Other;Other	0	0	2	0	0	2	1	5	0	0	2	0	1	1	1	0	0	1	1	0	0	0	0	0	0	0	0	0	0	0	0	0	0	0	0	0	0	0	0	0	0	0	1	3	4	4	4	0	0
Bacteria;Verrucomicrobia;Opitutae;Puniceicoccales;Puniceicoccaceae;Other	0	0	0	0	1	1	1	0	0	3	1	0	3	0	5	5	0	2	0	1	0	0	0	0	0	0	0	0	0	0	0	0	0	0	0	0	0	0	0	0	0	3	0	0	0	0	0	1	0
Bacteria;Verrucomicrobia;Other;Other;Other;Other	19	0	140	2	0	132	250	29	74	41	125	0	1	2	61	103	0	174	1	84	0	0	0	0	0	0	0	0	0	0	0	0	0	0	1	0	0	0	0	0	2	28	1	9	12	58	5	17	19
Bacteria;Verrucomicrobia;Verrucomicrobiae;Verrucomicrobiales;Verrucomicrobiaceae;Akkermansia	19	10	3	47	58	365	40	6053	1685	4520	13	25	533	227	8	0	39	5	170	99	0	0	0	0	0	0	0	0	0	0	0	0	0	2	6	23	14	5	0	26	32	2	11	70	34	88	529	21	169
[truncated: 11 more columns]

## Sheet: Species
Taxonomy	Adult1	Adult2	Adult3	Adult4	Adult5	Adult6	Adult7	Adult8	Adult9	Adult10	Adult11	Adult12	Adult13	Adult14	Adult15	Adult16	Adult17	Adult18	Adult19	Adult20	Young1	Young2	Young3	Young4	Young5	Young6	Young7	Young8	Young9	Young10	Young11	Young12	Young13	Young14	Young15	Young16	Young17	Young18	Young19	Young20	Young_FMT1	Young_FMT2	Young_FMT3	Young_FMT4	Young_FMT5	Young_FMT6	Young_FMT7	Young_FMT8	Young_FMT9
Archaea;Euryarchaeota;Methanobacteria;Methanobacteriales;Methanobacteriaceae;Methanobrevibacter;Methanobrevibacter_woesei	0	0	0	0	1	0	0	1	0	3	1	0	1	1	0	0	0	1	1	1	0	0	0	0	0	0	0	0	0	0	0	0	0	0	0	1	0	0	0	0	1	1	4	1	1	1	1	1	1
Archaea;Euryarchaeota;Methanomicrobia;Methanomicrobiales;Methanocorpusculaceae;Methanocorpusculum;Methanocorpusculum_sinense	0	0	0	0	0	0	0	0	0	0	0	0	0	0	0	0	0	0	0	0	0	0	0	0	0	0	0	0	0	0	0	0	0	0	0	0	0	0	0	0	0	0	0	0	0	0	0	0	0
Bacteria;Actinobacteria;Actinobacteria;Actinomycetales;Actinomycetaceae;Actinomyces;Actinomyces_oris	0	0	0	0	0	0	0	0	0	0	0	0	0	0	0	0	0	0	0	0	0	0	0	0	0	0	0	0	0	0	0	0	0	0	0	0	0	0	0	0	0	0	0	0	0	0	0	0	0
Bacteria;Actinobacteria;Actinobacteria;Actinomycetales;Brevibacteriaceae;Brevibacterium;Other	0	0	0	1	0	1	0	0	2	0	1	0	0	0	0	0	0	0	1	0	0	1	1	2	0	0	0	0	0	0	0	0	1	1	0	0	0	0	0	0	0	0	0	0	0	0	0	0	0
Bacteria;Actinobacteria;Actinobacteria;Actinomycetales;Corynebacteriaceae;Corynebacterium;Corynebacterium_stationis	0	0	0	0	0	1	1	3	2	0	0	0	0	0	2	0	0	0	0	0	3	3	0	0	2	0	2	0	0	1	0	0	0	2	0	0	0	0	0	0	0	0	0	1	0	0	0	0	0
Bacteria;Actinobacteria;Actinobacteria;Actinomycetales;Corynebacteriaceae;Corynebacterium;Other	0	0	0	0	0	0	0	3	0	0	0	1	0	0	0	0	0	0	0	0	1	0	0	0	0	0	0	0	0	0	0	0	0	1	0	0	0	0	0	0	2	0	1	0	0	0	0	0	0
Bacteria;Actinobacteria;Actinobacteria;Actinomycetales;Dermabacteraceae;Brachybacterium;Brachybacterium_conglomeratum	0	0	1	0	0	0	0	0	2	0	0	0	0	0	0	0	0	0	0	0	0	3	0	0	0	0	0	1	0	0	1	0	0	3	0	0	0	0	0	0	0	0	0	0	0	0	0	0	0
Bacteria;Actinobacteria;Actinobacteria;Actinomycetales;Other;Other;Other	0	0	0	0	0	0	0	1	0	0	0	0	0	0	0	0	0	0	0	0	0	0	0	0	4	0	0	0	0	0	0	0	0	0	0	0	0	0	0	0	0	0	0	0	0	0	0	0	0
Bacteria;Actinobacteria;Actinobacteria;Bifidobacteriales;Bifidobacteriaceae;Aeriscardovia;Aeriscardovia_aeriphila	0	0	0	0	1	0	0	0	0	0	0	0	0	0	0	1	0	0	0	0	0	0	0	0	0	0	0	0	0	0	0	0	0	0	0	0	0	0	0	0	0	0	0	0	0	0	0	0	0
Bacteria;Actinobacteria;Actinobacteria;Bifidobacteriales;Bifidobacteriaceae;Bifidobacterium;Bifidobacterium_saeculare	0	0	0	0	0	0	0	0	0	0	0	0	0	0	0	0	0	0	0	0	0	0	0	0	0	0	0	0	0	0	0	0	0	1	0	25	331	438	26	33	0	0	0	0	4	0	0	0	0
Bacteria;Actinobacteria;Actinobacteria;Coriobacteriales;Coriobacteriaceae;Adlercreutzia;Adlercreutzia_equolifaciens	5	37	0	14	18	2	3	5	0	3	0	8	7	7	2	4	5	1	9	5	0	0	0	0	0	0	0	0	0	0	0	0	0	0	0	0	0	0	0	0	5	1	2	22	4	1	5	1	3
Bacteria;Actinobacteria;Actinobacteria;Coriobacteriales;Coriobacteriaceae;Collinsella;Collinsella_tanakaei	33	117	34	158	128	218	136	232	290	806	53	133	92	76	47	27	68	12	66	109	0	0	0	0	0	6	0	18	26	27	1	0	0	46	8	614	712	939	108	467	51	52	74	34	27	8	96	18	45
Bacteria;Actinobacteria;Actinobacteria;Coriobacteriales;Coriobacteriaceae;Collinsella;Other	0	5	3	4	15	15	24	21	9	11	2	4	1	0	2	2	5	0	1	3	0	0	0	0	0	0	0	0	0	0	0	0	0	0	0	0	0	0	0	0	3	0	5	1	2	1	4	2	0
Bacteria;Actinobacteria;Actinobacteria;Coriobacteriales;Coriobacteriaceae;Eggerthella;Eggerthella_lenta	0	0	0	0	0	0	0	0	0	0	0	0	0	0	0	0	0	0	0	0	126	143	79	33	79	21	37	359	69	39	61	13	3	15	32	64	66	47	44	40	0	0	0	0	0	0	1	0	0
Bacteria;Actinobacteria;Actinobacteria;Coriobacteriales;Coriobacteriaceae;Enterorhabdus;Enterorhabdus_caecimuris	0	0	0	0	0	1	0	1	2	2	0	0	0	0	0	0	0	0	0	0	12	10	6	2	1	1	3	11	2	1	0	1	0	0	0	3	0	0	4	0	0	0	1	0	0	0	0	0	0
Bacteria;Actinobacteria;Actinobacteria;Coriobacteriales;Coriobacteriaceae;Gordonibacter;Gordonibacter_pamelaeae	0	0	0	0	0	0	0	0	0	0	0	0	0	0	0	0	0	0	0	0	4	2	4	0	3	3	2	5	2	0	1	0	0	0	8	11	10	0	7	1	0	0	0	0	0	0	0	0	0
Bacteria;Actinobacteria;Actinobacteria;Coriobacteriales;Coriobacteriaceae;Gordonibacter;Gordonibacter_urolithinfaciens	0	0	0	0	0	0	0	0	0	0	0	0	0	0	0	0	0	0	0	0	0	3	2	2	0	0	0	2	3	1	0	0	0	0	0	5	4	1	1	2	0	0	0	0	0	0	0	0	0
Bacteria;Actinobacteria;Actinobacteria;Coriobacteriales;Coriobacteriaceae;Gordonibacter;Other	0	0	0	0	0	0	0	0	0	0	0	0	0	0	0	0	0	0	0	0	0	0	0	0	0	1	0	0	0	0	0	0	0	0	0	0	1	1	0	0	0	0	0	0	0	0	0	0	0
Bacteria;Actinobacteria;Actinobacteria;Coriobacteriales;Coriobacteriaceae;Olsenella;Olsenella_scatoligenes	0	0	0	0	0	0	0	0	0	0	1	1	3	1	0	5	4	0	5	12	0	0	0	0	0	0	0	0	0	0	0	0	0	0	0	0	0	0	0	0	9	4	1	1	1	0	0	0	0
Bacteria;Actinobacteria;Actinobacteria;Coriobacteriales;Coriobacteriaceae;Olsenella;Olsenella_uli	92	189	72	388	282	816	284	462	752	914	251	624	1248	251	101	184	565	95	452	1048	0	0	0	0	1	0	0	0	0	0	0	0	0	0	51	0	4	44	0	4	404	514	396	337	143	40	181	133	257
Bacteria;Actinobacteria;Actinobacteria;Coriobacteriales;Coriobacteriaceae;Olsenella;Other	0	0	0	0	0	0	0	0	0	0	0	0	0	0	0	0	0	0	0	0	0	0	0	0	0	0	0	0	0	0	0	0	0	0	0	0	0	0	0	0	0	0	0	0	0	0	0	0	0
Bacteria;Actinobacteria;Actinobacteria;Coriobacteriales;Coriobacteriaceae;Other;Other	28	137	36	85	85	413	162	310	572	889	50	101	176	94	58	65	71	30	151	128	25	35	17	17	24	2	4	25	3	2	9	6	5	8	12	7	9	12	5	5	104	46	153	68	66	24	70	36	67
Bacteria;Actinobacteria;Actinobacteria;Coriobacteriales;Coriobacteriaceae;Paraeggerthella;Paraeggerthella_hongkongensis	0	0	0	0	0	0	0	0	2	0	0	0	0	0	0	0	0	0	0	0	0	0	0	0	0	0	0	0	0	0	0	0	0	0	0	0	0	0	0	0	0	0	0	0	0	0	0	0	0
Bacteria;Actinobacteria;Actinobacteria;Coriobacteriales;Coriobacteriaceae;Slackia;Other	5	2	5	1	2	0	0	0	0	0	2	2	6	1	3	2	7	0	8	1	0	0	0	0	0	0	0	0	0	0	0	0	0	0	0	0	0	0	0	0	16	5	17	0	0	0	0	0	0
Bacteria;Actinobacteria;Actinobacteria;Coriobacteriales;Coriobacteriaceae;Slackia;Slackia_equolifaciens	1	5	6	8	11	16	8	12	25	27	4	6	8	12	3	0	9	0	13	3	0	0	0	0	0	0	0	0	0	0	0	0	0	2	1	0	5	7	5	0	6	6	6	0	2	0	6	0	1
Bacteria;Bacteroidetes;Bacteroidia;Bacteroidales;Bacteroidaceae;Anaerorhabdus;Anaerorhabdus_furcosa	5	2	3	2	9	1	13	3	1	1	2	3	12	9	2	4	8	4	3	2	0	0	0	0	0	0	0	0	0	0	0	0	0	0	0	0	0	0	0	0	3	0	14	0	0	0	3	0	2
Bacteria;Bacteroidetes;Bacteroidia;Bacteroidales;Bacteroidaceae;Bacteroides;Bacteroides_barnesiae	2639	49	2013	76	111	66	290	46	30	23	3594	100	46	62	3400	936	3	1041	2	424	0	0	0	0	5	0	0	0	0	0	0	0	0	0	0	0	1	0	0	0	24	953	6	182	74	4405	65	2055	322
Bacteria;Bacteroidetes;Bacteroidia;Bacteroidales;Bacteroidaceae;Bacteroides;Bacteroides_cellulosilyticus	0	0	0	0	0	0	0	0	0	0	0	0	0	0	0	0	0	0	0	0	0	0	0	0	0	0	0	0	0	0	0	0	0	0	0	0	0	0	0	0	0	0	0	0	0	0	0	0	0
Bacteria;Bacteroidetes;Bacteroidia;Bacteroidales;Bacteroidaceae;Bacteroides;Bacteroides_clarus	0	0	0	0	0	0	0	0	0	0	0	0	0	0	0	3	0	0	0	0	175	0	11	0	6	0	57	2	2	34	0	321	35	3	0	75	39	68	26	75	0	0	0	0	0	1	0	0	0
Bacteria;Bacteroidetes;Bacteroidia;Bacteroidales;Bacteroidaceae;Bacteroides;Bacteroides_coprocola	52	1	36	6	3	30	206	21	10	12	73	9	2	1	80	108	5	199	0	16	0	0	0	0	3	0	0	0	0	0	0	0	0	0	0	0	0	0	0	0	17	611	2	20	9	122	22	90	5
Bacteria;Bacteroidetes;Bacteroidia;Bacteroidales;Bacteroidaceae;Bacteroides;Bacteroides_coprophilus	373	65	1313	52	34	15	123	2	1	4	726	4864	16	325	594	76	1	6	0	2	0	0	0	0	0	0	0	0	0	0	0	0	0	0	0	0	0	0	0	0	11	56	0	2	0	100	3	33	5
Bacteria;Bacteroidetes;Bacteroidia;Bacteroidales;Bacteroidaceae;Bacteroides;Bacteroides_dorei	0	0	0	1	0	0	0	0	0	0	0	0	1	0	0	0	0	0	0	1	5360	16	178	170	14134	482	1605	351	5309	10018	10	337	244	1633	9	372	70	376	20	492	0	1	0	0	0	1	2	0	0
Bacteria;Bacteroidetes;Bacteroidia;Bacteroidales;Bacteroidaceae;Bacteroides;Bacteroides_eggerthii	0	0	0	0	0	0	0	0	0	0	0	0	0	0	0	0	0	0	0	0	0	0	0	0	0	0	0	0	0	0	0	0	0	0	0	27	12	39	0	64	0	1	0	0	0	0	0	0	0
Bacteria;Bacteroidetes;Bacteroidia;Bacteroidales;Bacteroidaceae;Bacteroides;Bacteroides_fragilis	0	0	0	0	0	0	0	0	0	0	0	0	0	0	0	0	0	0	0	0	161	2	15	0	261	30	64	69	204	522	10	3194	384	387	1	35	7	13	6	61	0	0	0	0	0	0	2	0	0
Bacteria;Bacteroidetes;Bacteroidia;Bacteroidales;Bacteroidaceae;Bacteroides;Bacteroides_ovatus	0	1	1	0	0	0	0	0	0	0	0	0	0	0	0	0	0	0	0	0	57	1	51	2	108	11	64	5	55	76	3	302	404	506	0	16	2	17	6	19	0	1	0	0	0	1	0	0	0
Bacteria;Bacteroidetes;Bacteroidia;Bacteroidales;Bacteroidaceae;Bacteroides;Bacteroides_plebeius	78	3	132	2	20	20	479	9	5	6	294	714	9	44	506	63	2	82	0	69	0	0	0	0	0	0	0	0	0	0	0	0	0	0	0	0	1	0	1	1	22	1321	2	13	6	830	22	312	32
Bacteria;Bacteroidetes;Bacteroidia;Bacteroidales;Bacteroidaceae;Bacteroides;Bacteroides_salanitronis	335	6	1455	39	23	59	434	29	19	10	338	747	31	42	149	105	0	1000	1	67	0	0	0	0	0	0	0	0	0	0	0	0	0	0	0	0	0	0	0	0	0	123	0	76	12	153	49	312	392
Bacteria;Bacteroidetes;Bacteroidia;Bacteroidales;Bacteroidaceae;Bacteroides;Bacteroides_uniformis	212	10	192	83	37	41	71	11	18	7	366	23	9	11	227	27	4	108	1	11	382	0	43	20	190	96	271	28	0	383	0	0	0	292	0	105	30	91	35	53	3	144	1	12	0	342	43	114	19
Bacteria;Bacteroidetes;Bacteroidia;Bacteroidales;Bacteroidaceae;Bacteroides;Bacteroides_vulgatus	0	0	0	0	0	0	0	0	0	0	0	0	0	0	0	0	0	0	0	0	53	0	0	0	137	4	28	3	118	490	0	53	3	41	0	1	0	2	0	1	0	0	0	0	0	0	0	0	0
Bacteria;Bacteroidetes;Bacteroidia;Bacteroidales;Bacteroidaceae;Bacteroides;Other	6405	505	5721	311	466	329	2539	232	79	143	4467	1667	245	680	2958	5552	26	8102	22	1580	0	0	3	0	5	3	5	2	58	155	0	62	4	22	1	3	0	3030	0	10	156	10241	50	285	99	5858	315	3368	1180
Bacteria;Bacteroidetes;Bacteroidia;Bacteroidales;Other;Other;Other	1340	123	2338	107	376	34	782	113	19	27	1353	2297	139	634	1485	884	22	1098	5	998	0	0	0	0	0	7	30	0	34	3	0	7	0	0	0	49	16	79	6	46	125	1904	12	65	22	1843	163	1973	668
Bacteria;Bacteroidetes;Bacteroidia;Bacteroidales;Porphyromonadaceae;Barnesiella;Barnesiella_intestinihominis	3	0	16	0	3	5	12	6	3	0	8	11	4	1	3	13	1	110	1	4	0	0	0	1	0	0	0	0	0	0	1	0	0	185	1	339	17	608	189	508	0	8	2	5	3	5	1	3	2
Bacteria;Bacteroidetes;Bacteroidia;Bacteroidales;Porphyromonadaceae;Barnesiella;Barnesiella_viscericola	30	4	63	8	4	25	21	5	2	1	86	1130	44	7	118	62	19	51	11	13	0	0	0	0	53	0	2	0	0	13	15	2272	1115	3660	18	0	2	0	0	0	2	227	2	4	5	65	104	47	33
Bacteria;Bacteroidetes;Bacteroidia;Bacteroidales;Porphyromonadaceae;Barnesiella;Other	48	2	2	0	7	7	18	5	4	4	98	20	6	1	30	11	1	49	2	4	0	0	0	0	811	4	0	1	5	3	0	9	0	7	0	0	0	0	0	1	1	20	2	4	3	173	1	8	2
Bacteria;Bacteroidetes;Bacteroidia;Bacteroidales;Porphyromonadaceae;Butyricimonas;Butyricimonas_faecihominis	0	0	0	0	0	0	0	0	0	0	0	0	0	0	0	0	0	2	0	0	1	0	2	7	36	0	0	0	5	71	0	8	2	2	0	0	0	1	0	1	0	0	0	0	0	0	0	0	0
Bacteria;Bacteroidetes;Bacteroidia;Bacteroidales;Porphyromonadaceae;Butyricimonas;Butyricimonas_paravirosa	0	0	0	0	0	0	0	0	0	0	0	0	0	0	0	0	0	0	0	0	1	0	17	0	41	3	37	7	88	120	0	0	0	0	0	3	0	0	1	3	0	0	0	0	0	0	0	0	0
Bacteria;Bacteroidetes;Bacteroidia;Bacteroidales;Porphyromonadaceae;Butyricimonas;Butyricimonas_synergistica	5	0	0	0	0	0	0	0	0	0	0	0	0	0	0	0	0	3	0	4	0	0	0	0	0	0	0	0	0	0	0	0	0	0	0	0	0	0	0	0	0	0	0	0	0	0	0	0	0
Bacteria;Bacteroidetes;Bacteroidia;Bacteroidales;Porphyromonadaceae;Butyricimonas;Butyricimonas_virosa	1	0	0	0	0	0	0	0	0	0	0	0	1	0	0	1	0	0	0	1	0	0	0	8	37	1	0	0	31	7	0	31	7	8	0	0	0	3	0	8	0	0	0	0	0	0	1	1	0
Bacteria;Bacteroidetes;Bacteroidia;Bacteroidales;Porphyromonadaceae;Butyricimonas;Other	174	4	321	2	9	9	120	4	3	4	84	122	7	12	131	41	2	85	0	36	0	0	0	0	0	0	0	0	0	0	0	0	0	0	0	0	0	0	0	0	1	177	0	0	2	152	28	34	14
Bacteria;Bacteroidetes;Bacteroidia;Bacteroidales;Porphyromonadaceae;Coprobacter;Coprobacter_fastidiosus	112	10	86	18	3	21	38	6	6	1	73	7	5	5	102	23	3	62	1	54	105	1	40	12	324	21	108	28	111	382	1	3	51	273	0	96	13	73	11	139	2	101	0	8	5	38	18	68	33
Bacteria;Bacteroidetes;Bacteroidia;Bacteroidales;Porphyromonadaceae;Odoribacter;Odoribacter_laneus	391	24	391	6	38	11	204	27	3	5	129	45	10	50	79	78	2	191	0	118	89	0	0	0	827	0	0	0	1	0	0	0	0	0	0	0	0	0	0	0	5	161	0	9	4	240	46	137	24
Bacteria;Bacteroidetes;Bacteroidia;Bacteroidales;Porphyromonadaceae;Other;Other	347	30	602	37	42	1098	442	275	1809	46	997	113	60	51	341	3100	33	580	21	147	7	0	3	8	54	22	73	22	92	164	0	75	76	125	1	6	3	18	5	10	49	680	3	65	81	1095	25	328	53
Bacteria;Bacteroidetes;Bacteroidia;Bacteroidales;Porphyromonadaceae;Parabacteroides;Other	258	26	429	27	40	98	234	39	48	29	2115	162	47	60	647	318	7	564	6	142	0	0	0	0	0	0	0	0	0	0	0	0	0	0	0	0	0	0	0	0	20	733	10	79	57	714	34	502	135
Bacteria;Bacteroidetes;Bacteroidia;Bacteroidales;Porphyromonadaceae;Parabacteroides;Parabacteroides_distasonis	52	1	11	0	11	8	27	0	3	1	11	1	1	1	16	8	0	63	1	12	89	0	55	8	392	132	409	52	359	365	3	666	968	284	6	65	13	54	22	93	0	27	0	1	1	20	7	13	6
Bacteria;Bacteroidetes;Bacteroidia;Bacteroidales;Porphyromonadaceae;Parabacteroides;Parabacteroides_goldsteinii	0	0	0	0	0	0	0	0	0	0	0	0	0	0	0	0	0	0	0	0	0	0	0	0	0	0	0	0	0	0	0	0	0	0	0	10	1	0	0	0	0	0	0	0	0	0	0	0	0
Bacteria;Bacteroidetes;Bacteroidia;Bacteroidales;Porphyromonadaceae;Parabacteroides;Parabacteroides_merdae	2	0	0	0	0	0	0	0	0	1	0	0	0	0	0	1	0	0	0	0	0	0	0	0	0	0	0	0	0	1	0	0	0	0	0	199	52	134	55	122	0	0	0	0	0	5	1	0	2
Bacteria;Bacteroidetes;Bacteroidia;Bacteroidales;Prevotellaceae;Other;Other	79	5	124	4	10	4	69	8	1	0	42	140	0	6	29	26	0	248	1	12	0	0	0	3	0	0	0	0	0	0	0	0	0	0	0	0	0	0	0	0	1	127	1	28	8	146	8	19	0
Bacteria;Bacteroidetes;Bacteroidia;Bacteroidales;Prevotellaceae;Paraprevotella;Other	0	0	0	0	0	0	0	2	0	0	2	0	0	0	2	0	0	0	0	0	0	0	0	0	0	0	0	0	0	0	0	0	0	0	0	0	0	0	0	0	0	0	0	0	0	1	1	7	1
Bacteria;Bacteroidetes;Bacteroidia;Bacteroidales;Prevotellaceae;Paraprevotella;Paraprevotella_clara	686	50	399	116	112	46	92	18	7	2	452	45	17	37	192	414	0	1287	1	354	0	0	0	0	0	0	0	0	0	0	0	0	0	0	0	0	0	0	0	0	40	460	0	13	4	258	61	605	68
Bacteria;Bacteroidetes;Bacteroidia;Bacteroidales;Prevotellaceae;Prevotella;Other	1154	153	1598	111	153	212	1211	276	59	35	889	398	55	73	366	410	11	1582	24	351	0	0	0	1	0	0	0	0	0	0	0	0	0	0	0	0	0	0	2	0	14	1482	9	227	31	879	88	1112	227
Bacteria;Bacteroidetes;Bacteroidia;Bacteroidales;Prevotellaceae;Prevotella;Prevotella_baroniae	0	0	118	0	6	21	35	0	0	0	0	0	0	0	0	0	0	0	0	0	0	0	0	0	0	0	0	0	0	0	0	0	0	0	0	0	0	0	0	0	0	0	0	0	0	0	0	0	0
Bacteria;Bacteroidetes;Bacteroidia;Bacteroidales;Prevotellaceae;Prevotella;Prevotella_copri	0	1	1	3	0	0	0	0	0	0	0	1	1	0	0	0	0	0	0	0	0	0	0	3	0	1	0	0	0	0	0	0	0	0	0	0	0	0	3	0	1	0	0	0	0	0	0	0	0
Bacteria;Bacteroidetes;Bacteroidia;Bacteroidales;Rikenellaceae;Alistipes;Alistipes_finegoldii	46	9	37	1	14	27	19	14	5	1	93	61	43	23	34	26	31	18	5	24	269	37	80	16	325	849	1008	528	101	252	3	184	41	12	197	118	6	54	73	146	1	25	32	8	9	30	15	15	13
Bacteria;Bacteroidetes;Bacteroidia;Bacteroidales;Rikenellaceae;Alistipes;Alistipes_indistinctus	6	0	9	1	0	3	8	4	3	1	12	17	1	4	7	11	1	13	2	9	46	0	102	2	22	7	32	14	15	24	0	2	2	12	3	42	7	16	12	37	1	5	1	0	0	12	15	9	4
Bacteria;Bacteroidetes;Bacteroidia;Bacteroidales;Rikenellaceae;Alistipes;Alistipes_onderdonkii	2	0	4	0	1	4	2	0	0	0	9	3	0	0	12	5	0	7	0	1	4	0	6	0	74	0	3	0	0	5	0	0	0	0	0	1	0	2	0	2	0	9	0	0	0	4	3	3	0
Bacteria;Bacteroidetes;Bacteroidia;Bacteroidales;Rikenellaceae;Alistipes;Alistipes_shahii	36	3	82	3	6	18	39	4	3	3	137	77	3	12	110	33	3	240	0	25	41	0	32	14	1320	127	92	104	1036	17	0	57	19	18	0	3107	1233	1535	725	2910	3	246	5	9	5	133	61	52	26
Bacteria;Bacteroidetes;Bacteroidia;Bacteroidales;Rikenellaceae;Alistipes;Alistipes_timonensis	32	0	9	4	1	1	7	0	0	4	10	7	5	1	12	24	1	35	0	28	363	16	4739	112	762	19	28	4	30	119	0	43	17	23	0	40	7	4	3	24	0	76	0	1	2	151	79	14	1
Bacteria;Bacteroidetes;Bacteroidia;Bacteroidales;Rikenellaceae;Alistipes;Other	139	5	306	11	10	30	53	5	8	6	188	66	14	14	232	136	1	390	0	31	1640	6	775	71	819	213	443	76	576	1238	0	1261	420	296	2	987	66	289	123	1082	5	198	5	10	5	197	128	71	27
Bacteria;Bacteroidetes;Bacteroidia;Bacteroidales;Rikenellaceae;Other;Other	2	0	4	0	1	0	0	0	0	0	3	68	0	0	0	1	1	24	1	11	0	0	0	0	0	0	0	0	0	0	0	0	0	0	0	0	0	0	0	0	0	22	0	8	0	0	5	1	0
Bacteria;Bacteroidetes;Bacteroidia;Bacteroidales;Rikenellaceae;Rikenella;Rikenella_microfusus	7	0	1	0	2	0	3	0	0	0	3	3	0	1	2	12	0	10	0	0	1	0	1	0	55	0	0	0	0	0	0	0	0	0	0	0	0	1	0	0	0	9	0	0	1	62	28	10	1
Bacteria;Bacteroidetes;Flavobacteriia;Flavobacteriales;Other;Other;Other	32	3	20	4	0	7	48	2	10	4	12	0	0	14	0	33	0	105	0	29	0	0	0	0	0	0	0	0	0	0	0	0	0	0	0	0	0	0	0	0	4	8	0	3	0	34	14	6	4
Bacteria;Bacteroidetes;Other;Other;Other;Other;Other	235	54	714	99	39	86	67	60	26	17	1398	284	42	188	978	643	7	1218	0	568	5	0	17	0	67	0	0	0	0	0	0	0	0	0	0	246	37	161	47	242	26	767	9	156	17	263	117	378	132
Bacteria;Candidatus_Saccharibacteria;Unclassified;Unclassified;Unclassified;Saccharibacteria;Other	0	0	0	0	0	0	0	0	0	0	0	0	1	0	0	0	0	0	0	0	0	2	1	0	1	0	0	0	0	0	0	0	0	0	0	0	0	0	0	0	0	0	1	0	0	0	0	0	0
Bacteria;Candidatus_Saccharibacteria;Unclassified;Unclassified;Unclassified;Saccharibacteria;TM7_phylum	0	0	2	2	0	583	4	153	82	31	0	9	32	18	3	12	104	0	14	155	0	0	0	0	0	0	0	0	0	0	0	0	0	0	0	0	0	0	0	0	4	15	30	1	1	0	20	7	44
Bacteria;Deferribacteres;Deferribacteres;Deferribacterales;Deferribacteraceae;Mucispirillum;Mucispirillum_schaedleri	266	15	602	15	8	21	158	2	23	35	152	35	3	18	174	117	1	94	1	20	0	0	0	0	0	0	0	0	0	0	0	0	0	0	0	0	0	0	0	0	9	156	0	3	4	164	30	50	15
Bacteria;Deinococcus-Thermus;Deinococci;Thermales;Thermaceae;Thermus;Thermus_thermophilus	0	0	0	0	0	8	3	11	14	31	0	0	0	0	0	0	0	0	0	0	0	0	0	0	0	0	0	0	0	0	0	0	0	0	0	0	0	0	0	0	0	0	0	0	0	0	0	0	0
Bacteria;Elusimicrobia;Elusimicrobia;Elusimicrobiales;Elusimicrobiaceae;Elusimicrobium;Elusimicrobium_minutum	78	6	37	6	4	8	51	9	11	4	190	5	8	1	117	60	1	127	2	10	0	0	0	0	1	0	0	0	0	0	0	0	0	0	0	0	0	0	0	0	4	141	2	2	2	177	9	33	22
Bacteria;Firmicutes;Bacilli;Bacillales;Bacillaceae;Bacillus;Other	2	11	0	0	4	5	0	0	0	0	1	1	1	0	17	1	0	3	1	4	11	52	10	44	11	3	13	11	32	19	57	36	115	121	97	5	14	6	5	8	21	2	0	4	11	4	28	12	0
Bacteria;Firmicutes;Bacilli;Bacillales;Staphylococcaceae;Staphylococcus;Other	0	2	0	0	0	1	0	0	2	1	0	0	0	0	0	0	2	0	1	2	0	0	0	3	3	0	8	0	1	1	2	0	5	5	0	0	0	1	2	0	1	1	0	0	0	0	1	0	0
Bacteria;Firmicutes;Bacilli;Bacillales;Staphylococcaceae;Staphylococcus;Staphylococcus_sciuri	0	0	0	0	0	4	2	0	1	0	0	0	0	0	0	0	0	1	2	1	0	0	0	0	1	0	0	1	0	2	1	0	0	0	0	0	0	0	0	0	0	0	1	0	1	0	0	0	0
Bacteria;Firmicutes;Bacilli;Lactobacillales;Aerococcaceae;Facklamia;Facklamia_tabacinasalis	0	0	0	0	0	0	0	0	1	0	0	0	0	0	0	0	0	0	0	0	0	0	1	0	0	0	0	0	0	0	0	0	0	0	0	0	0	0	0	0	0	0	0	2	0	0	0	0	0
Bacteria;Firmicutes;Bacilli;Lactobacillales;Enterococcaceae;Enterococcus;Enterococcus_cecorum	2	2	3	3	1	20	12	15	193	41	15	30	17	14	8	2	1	5	4	9	16	127	9	5	36	7	147	39	82	12	2	0	1	9	0	38	220	21	52	24	6	6	3	19	11	5	3	1	7
Bacteria;Firmicutes;Bacilli;Lactobacillales;Enterococcaceae;Enterococcus;Enterococcus_faecalis	0	0	0	0	1	0	0	0	2	0	0	0	0	0	0	0	0	0	0	0	0	5	0	0	0	0	0	0	0	0	0	3	2	1	0	2	0	2	4	0	0	0	0	0	0	0	0	0	0
Bacteria;Firmicutes;Bacilli;Lactobacillales;Lactobacillaceae;Lactobacillus;Lactobacillus_apodemi	0	0	0	0	0	0	0	0	0	0	0	0	0	0	0	0	0	0	0	0	0	0	0	0	0	0	0	0	0	0	0	0	0	0	2	0	0	0	0	0	0	0	0	0	0	0	0	0	0
Bacteria;Firmicutes;Bacilli;Lactobacillales;Lactobacillaceae;Lactobacillus;Lactobacillus_aviarius	7	1	12	14	22	140	42	122	148	138	3	9	75	53	10	38	5	15	17	18	0	0	0	2	1	0	7	1	1	34	17	19	22	15	32	1	59	3	25	24	28	11	5	29	14	10	6	10	46
Bacteria;Firmicutes;Bacilli;Lactobacillales;Lactobacillaceae;Lactobacillus;Lactobacillus_coleohominis	0	0	0	0	0	2	2	4	3	10	0	0	2	0	1	0	0	5	1	0	0	1	0	0	1	0	0	0	2	1	0	0	1	0	1	3	1	0	0	1	1	1	1	3	1	0	1	1	0
Bacteria;Firmicutes;Bacilli;Lactobacillales;Lactobacillaceae;Lactobacillus;Lactobacillus_equi	1	0	0	0	0	28	42	6	123	29	5	15	23	3	4	1	1	7	9	2	0	0	0	0	0	0	0	0	0	0	0	0	0	0	0	0	4	14	15	3	5	6	2	4	5	0	2	0	21
Bacteria;Firmicutes;Bacilli;Lactobacillales;Lactobacillaceae;Lactobacillus;Lactobacillus_ingluviei	1	0	0	0	0	13	5	6	22	12	2	4	4	1	2	0	0	9	8	15	0	0	0	0	0	0	0	0	0	0	0	0	0	0	0	10	5	10	8	2	5	8	5	9	19	1	6	6	8
Bacteria;Firmicutes;Bacilli;Lactobacillales;Lactobacillaceae;Lactobacillus;Lactobacillus_saerimneri	0	0	1	0	1	5	2	3	3	6	1	1	0	0	0	0	0	3	1	2	0	0	0	0	0	1	2	0	8	3	0	2	2	1	0	1	8	2	4	1	0	0	1	6	0	0	4	0	0
Bacteria;Firmicutes;Bacilli;Lactobacillales;Lactobacillaceae;Lactobacillus;Lactobacillus_salivarius	8	1	11	7	2	45	40	25	296	82	5	19	42	9	5	3	2	18	15	18	85	28	46	33	71	15	37	10	36	16	32	37	93	101	45	43	30	71	66	31	20	16	15	19	35	6	22	10	13
Bacteria;Firmicutes;Bacilli;Lactobacillales;Lactobacillaceae;Lactobacillus;Other	20	14	23	12	13	497	266	109	271	1912	22	48	48	50	35	24	8	52	54	46	676	191	238	145	404	162	270	129	820	189	78	433	148	259	111	106	71	221	158	69	81	39	25	113	78	19	34	17	41
Bacteria;Firmicutes;Bacilli;Lactobacillales;Streptococcaceae;Streptococcus;Streptococcus_gallolyticus	1	0	0	0	1	58	10	57	575	69	9	14	1	9	5	3	2	5	13	10	3	3	3	4	3	0	0	0	0	0	0	6	1	0	0	0	0	0	0	0	9	9	27	24	19	2	3	0	4
Bacteria;Firmicutes;Clostridia;Clostridiales;Catabacteriaceae;Catabacter;Catabacter_hongkongensis	0	1	0	5	1	1	0	1	1	0	0	0	1	0	0	6	2	0	3	4	0	1	4	0	0	0	0	1	1	2	0	0	0	0	0	0	0	0	0	0	1	1	8	0	8	0	3	0	2
Bacteria;Firmicutes;Clostridia;Clostridiales;Christensenellaceae;Christensenella;Christensenella_minuta	1	8	2	8	4	2	2	2	4	6	3	13	14	10	6	5	6	2	13	9	9	2	1	6	0	0	2	6	5	1	3	1	3	1	11	10	2	10	6	13	5	5	16	19	12	2	11	3	7
Bacteria;Firmicutes;Clostridia;Clostridiales;Clostridiaceae;Clostridium_sensu_stricto;Clostridium_disporicum	0	0	0	0	0	0	0	1	0	0	0	0	0	0	0	0	0	0	0	0	0	0	0	1	0	0	0	1	5	0	0	0	0	1	0	0	1	0	0	0	0	1	1	0	0	0	0	0	0
Bacteria;Firmicutes;Clostridia;Clostridiales;Clostridiaceae;Clostridium_sensu_stricto;Other	0	0	0	0	0	0	0	1	0	0	0	0	0	0	1	0	0	0	0	0	0	0	2	1	0	1	2	2	1	0	1	2	1	1	1	4	0	0	6	2	0	0	0	0	0	1	0	0	0
Bacteria;Firmicutes;Clostridia;Clostridiales;Clostridiales;Anaerovorax;Anaerovorax_odorimutans	3	0	0	4	0	0	0	0	0	0	6	5	17	8	7	9	19	8	12	26	0	0	0	0	0	0	0	0	0	0	0	0	0	0	0	0	0	0	0	0	7	2	24	24	27	3	10	7	33
Bacteria;Firmicutes;Clostridia;Clostridiales;Clostridiales;Mogibacterium;Other	2	5	2	0	2	21	4	15	13	38	4	2	5	10	2	1	3	4	2	5	5	12	6	3	3	4	4	3	3	1	2	1	4	1	3	0	5	2	1	1	9	0	6	4	3	1	10	3	1
Bacteria;Firmicutes;Clostridia;Clostridiales;Clostridiales;Other;Other	17	28	12	41	38	45	47	89	74	105	44	37	70	41	18	35	41	24	50	24	8	14	4	9	11	15	7	11	10	14	8	9	14	5	1	15	3	5	2	5	90	35	45	36	54	28	54	84	77
Bacteria;Firmicutes;Clostridia;Clostridiales;Eubacteriaceae;Anaerofustis;Anaerofustis_stercorihominis	0	0	0	0	0	5	0	1	6	7	0	0	0	0	2	0	0	1	0	1	1	0	3	2	4	2	11	32	10	3	3	0	1	4	0	1	2	1	1	1	1	3	0	2	3	0	1	0	0
Bacteria;Firmicutes;Clostridia;Clostridiales;Eubacteriaceae;Eubacterium;Eubacterium_callanderi	0	0	0	0	0	0	0	0	0	0	0	0	0	0	0	0	0	0	0	0	0	11	0	0	0	1	0	0	0	0	1	1	0	1	0	1	2	2	2	0	0	0	0	0	0	0	0	0	0
Bacteria;Firmicutes;Clostridia;Clostridiales;Eubacteriaceae;Eubacterium;Eubacterium_coprostanoligenes	0	6	3	0	7	0	0	2	6	3	10	25	81	29	9	22	49	0	44	11	566	393	192	1246	316	94	53	298	109	92	36	4	60	32	173	91	2760	1287	397	805	2	3	30	70	28	0	336	67	29
Bacteria;Firmicutes;Clostridia;Clostridiales;Eubacteriaceae;Eubacterium;Eubacterium_sulci	0	0	0	0	0	0	0	0	0	0	0	0	0	0	0	0	0	0	0	0	0	0	0	0	0	0	0	0	0	0	0	0	0	0	0	0	0	0	0	0	0	0	0	0	0	0	0	0	0
Bacteria;Firmicutes;Clostridia;Clostridiales;Eubacteriaceae;Eubacterium;Other	33	121	74	109	210	194	88	148	172	221	97	297	317	195	70	268	259	51	133	130	46	185	67	12	36	45	29	43	36	31	20	31	23	22	48	53	130	83	51	70	151	54	143	124	146	44	355	66	88
Bacteria;Firmicutes;Clostridia;Clostridiales;Eubacteriaceae;Other;Other	2	0	0	1	1	4	2	3	5	2	1	0	4	1	3	1	6	1	3	2	0	0	0	0	0	0	0	0	0	0	0	0	0	0	0	0	0	0	0	0	0	1	1	2	0	0	1	1	1
Bacteria;Firmicutes;Clostridia;Clostridiales;Lachnospiraceae;Anaerostipes;Other	15	1	17	7	5	13	31	9	26	6	27	3	5	10	5	34	3	38	38	12	6	2	4	10	4	2	5	6	7	15	5	59	17	12	16	33	5	68	30	2	10	8	14	47	8	1	0	6	4
Bacteria;Firmicutes;Clostridia;Clostridiales;Lachnospiraceae;Blautia;Blautia_glucerasea	3	7	5	6	9	100	45	85	17	63	3	33	20	28	2	19	14	9	13	60	370	138	122	53	33	243	94	21	73	12	10	4	29	0	1	361	287	127	628	170	19	13	42	48	26	7	25	27	23
Bacteria;Firmicutes;Clostridia;Clostridiales;Lachnospiraceae;Blautia;Blautia_hydrogenotrophica	0	0	0	0	0	0	0	0	0	0	0	0	0	0	0	0	0	0	0	0	12	10	7	9	7	22	30	29	21	11	6	22	18	15	13	33	37	54	65	2	0	0	0	0	1	0	0	0	0
Bacteria;Firmicutes;Clostridia;Clostridiales;Lachnospiraceae;Blautia;Blautia_schinkii	0	0	0	0	0	0	0	0	0	0	0	0	0	1	0	0	0	0	0	0	2	13	39	0	3	45	15	22	38	8	35	13	12	25	25	2	0	1	8	10	0	0	0	0	0	0	0	0	0
Bacteria;Firmicutes;Clostridia;Clostridiales;Lachnospiraceae;Blautia;Other	16	25	23	24	16	92	30	47	36	100	18	32	23	42	21	28	21	22	20	52	266	127	186	88	40	172	111	133	119	37	82	78	87	270	162	239	931	267	552	125	54	16	142	43	54	16	31	18	35
Bacteria;Firmicutes;Clostridia;Clostridiales;Lachnospiraceae;Clostridium_XlVa;Clostridium_amygdalinum	0	1	2	2	1	17	6	4	6	1	1	3	4	0	1	2	1	1	1	5	13	29	25	196	24	46	48	39	13	17	82	51	123	62	206	1	0	4	3	1	1	0	10	12	7	1	1	1	10
Bacteria;Firmicutes;Clostridia;Clostridiales;Lachnospiraceae;Clostridium_XlVa;Clostridium_polysaccharolyticum	21	54	9	70	61	2	14	12	1	7	4	15	20	28	12	15	14	13	75	12	9	7	1	75	4	3	4	4	5	2	169	24	49	19	28	10	5	4	36	15	17	4	29	85	32	1	20	14	39
Bacteria;Firmicutes;Clostridia;Clostridiales;Lachnospiraceae;Clostridium_XlVa;Other	217	672	115	1103	491	1536	668	1303	1154	2109	229	567	1489	907	132	375	651	236	716	1049	822	1753	964	2454	889	1198	679	998	296	224	1233	617	1137	638	1156	216	596	641	542	520	342	151	1334	2128	1081	227	734	624	759
Bacteria;Firmicutes;Clostridia;Clostridiales;Lachnospiraceae;Clostridium_XlVb;Clostridium_colinum	2	2	1	0	1	0	1	3	1	0	0	0	0	0	0	0	1	0	0	2	13	3	7	5	10	2	5	54	2	1	8	5	19	24	4	3	53	87	2	92	0	0	0	0	3	3	32	0	5
Bacteria;Firmicutes;Clostridia;Clostridiales;Lachnospiraceae;Clostridium_XlVb;Clostridium_lactatifermentans	272	219	210	194	123	89	194	114	58	75	230	244	154	661	332	345	216	295	462	413	251	101	133	320	569	452	1310	1071	814	500	1458	962	1455	668	1377	219	16	192	185	149	610	144	290	157	399	528	479	776	883
Bacteria;Firmicutes;Clostridia;Clostridiales;Lachnospiraceae;Clostridium_XlVb;Clostridium_propionicum	0	0	0	0	0	0	0	0	0	0	0	0	0	0	0	0	0	1	0	0	0	0	0	0	0	2	0	0	1	1	1	4	1	0	0	0	0	0	0	2	0	0	0	0	0	0	0	0	0
Bacteria;Firmicutes;Clostridia;Clostridiales;Lachnospiraceae;Clostridium_XlVb;Other	31	16	25	9	8	19	18	37	11	8	18	100	16	132	20	65	29	34	95	87	3	10	11	9	1	171	155	50	93	43	32	42	28	16	17	45	5	29	47	29	67	12	72	112	102	30	42	155	155
Bacteria;Firmicutes;Clostridia;Clostridiales;Lachnospiraceae;Coprococcus;Coprococcus_comes	2	3	7	2	0	33	40	25	38	78	11	16	22	23	7	24	12	19	52	14	112	48	125	72	31	19	5	116	8	7	9	23	16	5	11	29	106	69	176	94	11	1	21	56	41	1	37	1	8
Bacteria;Firmicutes;Clostridia;Clostridiales;Lachnospiraceae;Lachnospira;Lachnospira_multipara	0	0	0	1	0	0	0	0	0	0	0	0	0	0	0	0	0	0	0	0	2	0	0	0	0	1	9	1	3	3	17	26	32	25	4	6	0	8	3	1	0	0	0	0	0	0	0	0	0
Bacteria;Firmicutes;Clostridia;Clostridiales;Lachnospiraceae;Other;Other	673	1392	522	1876	1907	2748	2217	2694	1802	3178	678	2162	2836	2751	628	2105	1893	955	2815	2581	2697	4228	3612	4177	2409	2976	1779	2485	1876	993	4598	1894	2519	2925	3068	2019	3351	3767	3874	2245	1982	564	2998	4187	3447	432	2296	1308	1772
Bacteria;Firmicutes;Clostridia;Clostridiales;Lachnospiraceae;Roseburia;Other	13	83	10	43	34	18	11	13	16	14	21	28	65	18	2	38	22	14	39	19	168	181	32	206	100	68	41	82	32	31	53	17	52	34	31	170	113	181	209	167	13	2	36	129	44	12	43	17	33
Bacteria;Firmicutes;Clostridia;Clostridiales;Lachnospiraceae;Roseburia;Roseburia_intestinalis	4	34	10	150	59	8	3	5	12	19	3	3	1	12	0	4	12	0	2	5	0	0	0	0	0	0	0	0	0	0	0	0	0	0	4	2	0	2	0	0	1	0	0	5	1	0	7	3	2
Bacteria;Firmicutes;Clostridia;Clostridiales;Lachnospiraceae;Ruminococcus2;Other	49	200	73	371	249	611	259	336	175	318	158	746	1015	619	92	314	432	219	1151	583	1705	2811	4941	3636	2202	1407	714	1339	646	532	2523	1038	1131	1524	2933	1876	4503	3003	3031	2228	535	114	1005	1958	1529	42	1130	294	527
Bacteria;Firmicutes;Clostridia;Clostridiales;Lachnospiraceae;Ruminococcus2;Ruminococcus_torques	315	449	514	898	792	1038	1324	682	762	599	959	1772	3669	2061	751	679	3469	541	2955	724	1944	3381	7506	2915	2558	1247	732	2148	1595	2211	1181	1009	911	1416	2470	2618	2546	1874	3178	1829	1172	954	1561	2752	1345	305	1852	560	1105
Bacteria;Firmicutes;Clostridia;Clostridiales;Other;Other;Other	1106	1640	1508	1539	1444	2060	1263	1851	2355	1883	1778	2401	9832	3820	1818	2216	4713	2252	5690	3992	8301	9873	5665	13748	6276	6679	5631	3465	2217	2198	5865	3433	4902	2912	9275	9879	14900	9281	12891	9437	2270	1403	3856	6137	3677	1204	9867	1283	2951
Bacteria;Firmicutes;Clostridia;Clostridiales;Peptococcaceae;Peptococcus;Peptococcus_niger	12	9	6	6	8	20	70	34	36	90	22	33	17	9	9	9	3	17	13	27	0	0	0	0	0	0	0	0	0	0	0	0	0	0	0	0	0	0	0	0	17	14	10	37	40	0	7	14	7
Bacteria;Firmicutes;Clostridia;Clostridiales;Peptostreptococcaceae;Clostridium_XI;Other	0	0	0	0	0	0	0	0	0	0	0	0	0	0	0	0	0	0	0	0	0	0	0	0	0	0	0	0	0	0	0	0	0	0	0	0	0	0	0	0	0	0	0	0	0	0	0	0	0
Bacteria;Firmicutes;Clostridia;Clostridiales;Peptostreptococcaceae;Peptostreptococcus;Peptostreptococcus_russellii	0	0	1	0	0	0	0	0	0	0	0	3	0	0	0	0	0	0	0	0	0	0	0	0	0	0	0	0	0	0	0	0	0	0	0	0	0	0	0	0	0	0	0	0	0	0	0	0	0
Bacteria;Firmicutes;Clostridia;Clostridiales;Peptostreptococcaceae;Romboutsia;Romboutsia_sedimentorum	3	0	0	2	0	24	25	46	61	13	13	35	17	6	5	31	14	11	36	52	0	0	0	0	0	0	0	0	0	0	0	0	0	0	0	0	0	0	0	1	12	36	44	69	24	8	1	21	6
Bacteria;Firmicutes;Clostridia;Clostridiales;Ruminococcaceae;Acetanaerobacterium;Acetanaerobacterium_elongatum	19	22	18	18	9	17	20	28	16	13	23	14	1	2	20	28	0	27	4	10	4	0	0	5	15	8	7	29	5	5	1	81	55	19	5	5	2	3	3	10	5	19	12	10	8	28	4	15	29
Bacteria;Firmicutes;Clostridia;Clostridiales;Ruminococcaceae;Anaerofilum;Other	21	63	20	25	39	78	68	115	92	77	33	50	67	65	26	46	92	38	81	59	7	9	2	15	0	10	12	3	9	11	0	3	0	2	3	10	10	5	8	13	68	40	83	114	161	22	61	31	76
Bacteria;Firmicutes;Clostridia;Clostridiales;Ruminococcaceae;Anaerotruncus;Anaerotruncus_colihominis	44	37	40	33	22	38	79	36	11	4	66	37	2	6	47	64	0	40	1	13	17	2	5	5	68	84	130	192	124	225	9	169	297	111	17	29	5	16	6	81	7	47	5	24	8	60	7	33	38
Bacteria;Firmicutes;Clostridia;Clostridiales;Ruminococcaceae;Butyricicoccus;Butyricicoccus_pullicaecorum	411	1084	297	1117	779	604	420	387	419	585	238	439	550	641	432	312	538	349	564	382	448	567	237	489	225	295	492	263	314	317	608	364	779	2290	474	292	466	294	448	775	557	319	568	416	669	323	208	326	296
Bacteria;Firmicutes;Clostridia;Clostridiales;Ruminococcaceae;Clostridium_III;Other	11	25	4	33	4	28	11	5	25	54	11	14	31	13	17	16	12	15	26	25	15	16	18	43	9	10	40	67	90	36	5	17	5	3	9	8	4	3	3	5	5	6	19	18	26	5	18	5	12
Bacteria;Firmicutes;Clostridia;Clostridiales;Ruminococcaceae;Clostridium_IV;Clostridium_leptum	15	43	26	42	42	23	33	19	13	9	11	41	11	54	19	46	28	13	102	71	139	144	54	304	82	79	78	124	85	82	179	82	114	74	170	63	19	90	123	159	99	39	73	104	107	13	55	33	61
Bacteria;Firmicutes;Clostridia;Clostridiales;Ruminococcaceae;Clostridium_IV;Clostridium_methylpentosum	30	30	19	24	21	22	25	16	11	5	23	12	5	18	12	46	1	32	6	25	19	12	5	14	42	34	52	109	16	31	6	48	51	34	21	23	11	16	16	35	14	14	12	52	32	36	7	18	29
Bacteria;Firmicutes;Clostridia;Clostridiales;Ruminococcaceae;Clostridium_IV;Clostridium_sporosphaeroides	52	168	42	164	196	37	97	66	19	18	39	192	65	239	42	117	71	86	182	222	274	259	27	673	175	247	220	372	228	81	217	130	145	124	392	218	55	205	233	120	91	37	121	148	248	16	130	113	216
Bacteria;Firmicutes;Clostridia;Clostridiales;Ruminococcaceae;Clostridium_IV;Clostridium_viride	4	0	3	2	1	2	2	0	1	0	2	2	6	0	1	0	0	3	1	7	0	0	0	0	0	0	0	0	0	0	0	0	0	0	0	0	0	0	0	0	0	0	2	4	4	1	2	0	1
Bacteria;Firmicutes;Clostridia;Clostridiales;Ruminococcaceae;Clostridium_IV;Other	108	286	94	297	323	188	189	374	112	93	118	267	333	418	88	230	298	90	416	330	52	141	78	159	86	348	405	518	219	181	597	219	299	442	436	110	34	185	242	206	168	107	415	458	435	94	329	204	347
Bacteria;Firmicutes;Clostridia;Clostridiales;Ruminococcaceae;Faecalibacterium;Faecalibacterium_prausnitzii	865	3190	432	1650	12868	1062	393	314	310	72	696	1654	653	1220	354	659	575	519	1336	1556	1195	1184	1316	355	784	7230	17957	7931	9775	5832	2716	5846	8483	247	2476	5454	2441	5377	6258	5951	1415	1155	778	432	1388	606	922	2930	4376
Bacteria;Firmicutes;Clostridia;Clostridiales;Ruminococcaceae;Flavonifractor;Flavonifractor_plautii	443	236	409	457	138	97	426	164	50	37	520	413	97	478	888	1197	116	589	681	664	382	15	30	192	468	530	703	390	714	607	1223	916	1044	1372	184	220	30	209	78	207	914	449	561	730	1014	1397	184	1555	942
Bacteria;Firmicutes;Clostridia;Clostridiales;Ruminococcaceae;Gemmiger;Gemmiger_formicilis	22	152	20	29	144	27	22	103	33	39	100	58	137	127	123	34	241	7	107	330	11	149	113	8	14	78	47	346	11	39	368	23	14	7	59	565	393	34	99	207	432	24	174	106	359	35	307	44	31
Bacteria;Firmicutes;Clostridia;Clostridiales;Ruminococcaceae;Hydrogenoanaerobacterium;Hydrogenoanaerobacterium_saccharovorans	16	40	14	17	8	10	9	7	4	2	15	8	2	1	27	21	2	32	0	4	1	1	0	4	5	6	2	1	7	5	36	10	14	22	34	2	1	3	0	1	5	26	1	8	7	17	0	13	3
Bacteria;Firmicutes;Clostridia;Clostridiales;Ruminococcaceae;Intestinimonas;Intestinimonas_butyriciproducens	128	343	84	253	268	86	114	50	91	189	102	202	105	262	192	248	106	130	165	181	33	153	30	96	21	105	117	174	247	157	154	93	144	112	263	112	18	45	72	88	303	98	158	201	337	102	162	134	212
Bacteria;Firmicutes;Clostridia;Clostridiales;Ruminococcaceae;Oscillibacter;Oscillibacter_ruminantium	222	89	177	303	74	280	283	220	91	23	298	302	52	331	466	557	62	339	182	290	146	14	43	140	233	265	343	215	178	216	245	214	244	136	178	146	30	133	80	110	402	250	451	404	408	344	141	402	430
Bacteria;Firmicutes;Clostridia;Clostridiales;Ruminococcaceae;Oscillibacter;Oscillibacter_valericigenes	0	0	0	0	0	0	1	0	0	0	1	1	0	0	2	0	0	0	0	0	0	0	0	0	0	0	0	0	0	0	0	0	0	0	0	0	0	0	0	0	0	1	0	0	0	1	0	0	0
Bacteria;Firmicutes;Clostridia;Clostridiales;Ruminococcaceae;Oscillibacter;Other	32	48	37	54	30	49	47	52	11	4	49	45	34	122	92	159	49	45	145	182	1	0	0	5	0	19	6	6	12	7	11	14	15	75	14	12	0	19	9	13	373	62	231	212	187	63	77	86	122
Bacteria;Firmicutes;Clostridia;Clostridiales;Ruminococcaceae;Other;Other	3253	8436	3240	7716	5190	3192	4692	3522	2040	1742	3519	6812	4355	11152	7218	7272	5216	3839	10612	9464	4297	7233	4168	7218	2881	5800	7082	10198	4624	4288	8969	10432	10825	11404	13913	9092	5629	5920	5666	7418	12169	3134	7647	9427	10891	3676	7477	6695	9911
Bacteria;Firmicutes;Clostridia;Clostridiales;Ruminococcaceae;Pseudoflavonifractor;Pseudoflavonifractor_capillosus	483	630	429	707	1367	117	567	223	412	188	401	1002	72	605	1506	472	58	337	215	759	830	2534	801	1404	795	827	678	1517	2287	2262	2250	1141	1906	1053	1136	382	113	189	614	938	1666	504	181	410	478	626	671	685	820
Bacteria;Firmicutes;Clostridia;Clostridiales;Ruminococcaceae;Ruminococcus;Other	31	16	21	64	31	0	18	4	3	0	5	2	1	0	2	11	6	8	1	2	3	8	0	13	22	0	3	2	22	28	13	15	17	29	15	51	2	15	12	40	1	12	1	1	5	15	0	4	5
Bacteria;Firmicutes;Clostridia;Clostridiales;Ruminococcaceae;Ruminococcus;Ruminococcus_albus	0	0	0	0	0	0	0	0	0	0	0	0	0	0	0	0	0	0	0	0	3	0	0	4	0	0	3	1	5	0	1	4	0	1	1	4	1	4	3	1	0	0	0	0	0	0	0	0	0
Bacteria;Firmicutes;Clostridia;Clostridiales;Ruminococcaceae;Ruminococcus;Ruminococcus_bromii	22	5	26	12	17	7	15	9	8	4	12	2	19	2	51	44	27	117	3	36	52	59	12	49	32	36	65	39	58	73	104	33	198	20	133	38	30	13	22	39	3	20	22	17	15	31	38	80	14
Bacteria;Firmicutes;Clostridia;Clostridiales;Ruminococcaceae;Ruminococcus;Ruminococcus_callidus	0	0	0	0	0	0	0	0	0	0	0	0	0	0	0	1	0	1	0	0	0	0	0	0	0	0	0	0	0	0	0	0	0	0	0	0	0	0	0	0	0	0	1	0	0	0	1	1	1
Bacteria;Firmicutes;Clostridia;Clostridiales;Ruminococcaceae;Sporobacter;Sporobacter_termitidis	374	389	163	2694	496	72	85	62	24	26	230	149	92	519	614	795	99	267	336	427	31	7	9	134	6	1422	1281	267	1352	505	44	463	204	124	377	176	9	119	195	152	704	149	396	689	317	212	396	447	806
Bacteria;Firmicutes;Clostridia;Clostridiales;Ruminococcaceae;Subdoligranulum;Subdoligranulum_variabile	19	79	19	116	59	385	101	283	163	1484	69	400	1323	350	160	364	656	72	1250	520	514	6068	3529	915	840	355	199	385	270	322	5599	265	55	247	677	1904	1274	379	1562	983	1059	113	378	148	618	73	610	393	330
Bacteria;Firmicutes;Clostridia;Clostridiales;Syntrophomonadaceae;Syntrophomonas;Syntrophomonas_zehnderi	0	0	4	1	1	1	5	7	1	1	2	1	1	0	0	5	0	4	0	1	0	0	0	0	0	0	0	0	0	0	0	0	0	0	0	0	0	0	0	2	0	0	2	7	1	7	0	2	1
Bacteria;Firmicutes;Clostridia;Other;Other;Other;Other	5	44	4	29	20	54	28	135	80	34	7	74	66	53	13	27	55	7	47	52	0	0	0	1	1	4	3	10	0	0	0	0	0	0	0	16	6	16	6	9	30	5	66	33	26	2	50	34	29
Bacteria;Firmicutes;Erysipelotrichia;Erysipelotrichales;Erysipelotrichaceae;Clostridium_XVIII;Clostridium_saccharogumia	3	2	6	6	6	3	3	4	3	5	2	12	13	14	2	1	4	2	19	11	10	24	2	39	4	16	11	11	4	5	7	18	10	16	14	21	24	18	28	18	1	3	9	18	10	2	18	7	9
Bacteria;Firmicutes;Erysipelotrichia;Erysipelotrichales;Erysipelotrichaceae;Clostridium_XVIII;Clostridium_spiroforme	0	0	1	1	0	2	1	1	0	2	1	1	0	1	0	2	0	0	0	0	152	53	173	104	127	64	43	101	107	95	58	81	88	61	64	47	24	15	61	48	3	3	0	1	3	0	23	0	0
Bacteria;Firmicutes;Erysipelotrichia;Erysipelotrichales;Erysipelotrichaceae;Clostridium_XVIII;Other	9	6	5	56	15	11	13	12	34	16	14	11	24	17	10	6	12	2	10	7	36	127	107	64	57	33	27	51	106	77	24	38	98	26	116	58	134	115	198	110	20	15	10	7	11	7	17	2	2
Bacteria;Firmicutes;Erysipelotrichia;Erysipelotrichales;Erysipelotrichaceae;Faecalicoccus;Faecalicoccus_acidiformans	15	14	19	24	35	60	75	37	18	54	15	53	22	41	17	17	40	16	17	54	163	55	24	165	22	122	46	88	173	53	22	23	47	0	132	29	62	93	122	39	11	18	18	109	9	4	33	15	23
Bacteria;Firmicutes;Erysipelotrichia;Erysipelotrichales;Erysipelotrichaceae;Faecalicoccus;Faecalicoccus_pleomorphus	0	0	0	0	0	0	0	0	0	0	0	3	2	1	1	4	1	0	0	0	0	0	0	0	0	0	0	0	0	0	0	0	0	0	0	0	0	0	0	0	4	2	0	0	0	0	0	0	0
Bacteria;Firmicutes;Erysipelotrichia;Erysipelotrichales;Erysipelotrichaceae;Faecalicoccus;Other	0	0	0	0	0	0	0	0	0	0	0	0	0	0	0	0	0	0	0	0	0	2	0	0	1	0	0	0	1	0	0	0	0	0	0	0	0	0	0	0	0	0	0	0	1	0	0	0	0
Bacteria;Firmicutes;Erysipelotrichia;Erysipelotrichales;Erysipelotrichaceae;Faecalitalea;Faecalitalea_cylindroides	2	0	5	0	5	10	43	40	7	115	8	8	5	7	5	5	0	15	12	5	0	0	0	0	0	0	0	0	0	0	0	0	0	0	0	0	9	1	0	1	7	2	3	5	30	4	4	1	1
Bacteria;Firmicutes;Erysipelotrichia;Erysipelotrichales;Erysipelotrichaceae;Holdemania;Holdemania_filiformis	4	1	2	6	6	4	9	8	10	5	2	13	9	11	4	10	12	4	15	5	15	11	3	20	11	11	19	22	6	13	9	25	21	3	14	10	23	14	21	10	7	3	5	12	9	1	41	7	6
Bacteria;Firmicutes;Erysipelotrichia;Erysipelotrichales;Erysipelotrichaceae;Other;Other	16	3	32	78	57	27	20	11	15	16	39	38	46	96	7	8	6	14	17	5	763	2838	3553	262	746	43	48	90	109	135	184	272	67	85	679	73	49	47	104	104	68	19	2	13	19	7	66	0	18
Bacteria;Firmicutes;Erysipelotrichia;Erysipelotrichales;Erysipelotrichaceae;Turicibacter;Turicibacter_sanguinis	0	0	0	0	0	0	0	0	4	0	0	0	1	0	0	0	0	2	1	1	0	0	0	0	0	0	0	0	0	0	0	0	0	0	0	0	0	0	0	0	0	1	3	1	0	1	0	0	0
Bacteria;Firmicutes;Negativicutes;Selenomonadales;Acidaminococcaceae;Other;Other	1688	1104	3037	643	752	834	2285	1095	248	40	1355	1039	169	154	582	934	197	1175	610	519	0	1	0	0	661	1884	1872	2553	1329	2135	895	81	215	2226	385	155	63	1058	357	808	134	1029	933	2256	1432	1432	473	976	648
Bacteria;Firmicutes;Negativicutes;Selenomonadales;Acidaminococcaceae;Phascolarctobacterium;Phascolarctobacterium_faecium	1	0	0	0	0	0	0	0	0	0	0	0	0	0	1	0	0	0	0	0	0	3	0	0	0	0	0	0	0	0	0	0	0	0	0	574	289	94	204	554	0	0	0	0	0	14	0	0	5
Bacteria;Firmicutes;Negativicutes;Selenomonadales;Acidaminococcaceae;Phascolarctobacterium;Phascolarctobacterium_succinatutens	34	0	0	0	0	0	0	0	3	0	0	0	0	0	0	0	0	14	0	42	0	0	0	0	0	0	0	0	0	0	0	0	0	0	0	0	0	0	0	0	218	98	1	89	0	0	0	0	0
Bacteria;Firmicutes;Negativicutes;Selenomonadales;Veillonellaceae;Megamonas;Megamonas_funiformis	16	48	12	5	329	16	72	1	37	32	102	175	7	27	15	1	9	0	2	2	285	15	1	60	23	856	538	359	529	56	0	0	0	6	0	0	0	0	0	0	101	12	0	8	0	149	26	209	43
Bacteria;Firmicutes;Negativicutes;Selenomonadales;Veillonellaceae;Megamonas;Megamonas_hypermegale	80	515	21	187	709	5804	1613	1242	1483	1278	499	166	160	86	176	55	38	1	25	35	0	0	0	0	0	0	0	0	0	0	0	0	0	0	0	0	0	0	0	0	91	13	18	75	2	0	0	0	0
Bacteria;Firmicutes;Negativicutes;Selenomonadales;Veillonellaceae;Megamonas;Megamonas_rupellensis	60	382	61	39	2170	172	687	18	379	350	714	416	59	46	173	45	14	4	17	8	7872	501	36	1269	664	4718	2648	1592	2967	300	0	0	0	59	1	0	0	0	0	0	272	28	7	14	3	341	232	1566	269
Bacteria;Firmicutes;Negativicutes;Selenomonadales;Veillonellaceae;Megasphaera;Other	1128	1970	548	43	1467	1078	5073	1065	2203	954	840	998	54	115	156	77	14	44	16	16	0	0	0	0	0	0	0	0	0	0	0	0	0	0	0	0	0	1	0	0	41	2	62	77	136	138	140	720	6
Bacteria;Firmicutes;Negativicutes;Selenomonadales;Veillonellaceae;Veillonella;Veillonella_dispar	0	0	0	0	0	0	0	0	0	0	0	0	0	0	0	0	0	0	0	0	0	0	0	0	0	0	0	0	0	0	0	0	0	0	0	0	0	0	0	0	0	0	0	0	0	0	0	0	0
Bacteria;Firmicutes;Negativicutes;Selenomonadales;Veillonellaceae;Veillonella;Veillonella_magna	3	3	10	1	4	0	130	12	9	6	2	4	2	7	4	5	1	0	0	15	0	0	0	0	0	0	0	0	0	0	0	0	0	0	0	0	0	0	0	0	59	27	0	1	0	17	10	1	2
Bacteria;Firmicutes;Negativicutes;Selenomonadales;Veillonellaceae;Veillonella;Veillonella_seminalis	0	0	0	0	0	0	0	2	0	0	0	0	0	0	0	0	0	0	0	0	0	0	0	0	0	0	0	0	0	0	0	0	0	0	0	0	0	0	0	0	0	0	0	0	0	0	0	0	0
Bacteria;Firmicutes;Other;Other;Other;Other;Other	354	575	341	561	393	460	386	831	883	742	334	525	877	585	457	416	795	610	1283	524	445	66	330	745	363	131	118	234	40	90	463	412	250	74	370	173	244	299	406	370	787	395	1236	1103	1486	514	475	632	623
Bacteria;Fusobacteria;Fusobacteriia;Fusobacteriales;Fusobacteriaceae;Fusobacterium;Other	53	6	43	1	4	8	200	0	0	0	442	15	2	11	619	118	3	145	8	14	0	0	0	0	0	0	0	0	0	0	0	0	0	0	0	0	0	0	0	0	0	183	0	0	2	301	1	142	38
Bacteria;Lentisphaerae;Lentisphaeria;Victivallales;Victivallaceae;Victivallis;Victivallis_vadensis	32	0	7	5	0	0	15	1	1	0	9	0	0	0	3	10	0	20	0	0	0	0	0	0	2	0	0	0	0	0	0	16	4	8	0	0	0	1	0	1	0	9	0	1	0	7	0	2	1
Bacteria;Other;Other;Other;Other;Other;Other	2348	3504	765	1203	1829	833	414	598	948	848	790	1974	3250	4659	1590	903	4591	888	2406	2000	82	72	72	92	85	129	128	114	128	133	144	176	273	136	236	156	554	645	496	643	5643	1061	3923	728	1539	1695	2477	2675	2197
Bacteria;Proteobacteria;Alphaproteobacteria;Other;Other;Other;Other	44	4	46	8	1	0	7	0	2	4	24	8	0	0	9	0	0	23	0	14	0	0	0	0	0	0	0	0	0	0	0	0	0	0	0	0	0	0	0	0	0	1	0	0	0	35	3	3	2
Bacteria;Proteobacteria;Alphaproteobacteria;Rhizobiales;Phyllobacteriaceae;Phyllobacterium;Phyllobacterium_myrsinacearum	0	2	3	2	1	1	2	2	0	2	0	0	0	0	0	0	0	0	1	6	0	0	0	0	12	0	0	0	0	0	0	0	0	0	0	0	0	0	0	1	0	0	0	0	0	1	0	0	0
Bacteria;Proteobacteria;Alphaproteobacteria;Rhodospirillales;Other;Other;Other	52	1	111	6	6	10	39	11	4	7	9	4	7	0	12	9	1	7	1	4	0	0	0	0	0	0	0	0	0	0	0	0	0	0	0	0	0	0	0	0	0	3	0	0	1	26	0	0	0
Bacteria;Proteobacteria;Alphaproteobacteria;Rhodospirillales;Rhodospirillaceae;Aestuariispira;Aestuariispira_insulae	0	0	0	0	0	0	0	0	0	0	0	0	0	0	0	4	0	1	0	1	2	0	0	0	56	9	20	10	39	55	0	15	74	149	0	2	0	0	0	0	0	0	0	0	0	0	0	0	0
Bacteria;Proteobacteria;Alphaproteobacteria;Rhodospirillales;Rhodospirillaceae;Other;Other	87	3	159	3	5	16	17	1	11	31	7	0	0	1	16	28	0	51	0	7	4	0	32	23	9	0	0	0	0	0	0	1	2	70	0	3	4	1	1	20	2	10	1	1	0	36	4	18	3
Bacteria;Proteobacteria;Betaproteobacteria;Burkholderiales;Comamonadaceae;Comamonas;Comamonas_kerstersii	0	0	0	0	0	0	0	0	0	0	1	0	0	0	3	0	0	0	0	0	0	0	0	0	0	0	0	0	0	0	0	0	0	0	0	0	0	0	0	0	0	0	0	0	0	0	0	0	0
Bacteria;Proteobacteria;Betaproteobacteria;Burkholderiales;Oxalobacteraceae;Oxalobacter;Oxalobacter_formigenes	2	0	1	0	0	0	0	0	0	0	4	0	1	0	1	3	1	1	0	0	0	0	0	0	0	0	0	0	0	0	0	0	0	1	0	0	0	0	0	0	1	0	0	1	1	4	0	0	1
Bacteria;Proteobacteria;Betaproteobacteria;Burkholderiales;Sutterellaceae;Other;Other	28	1	35	0	0	2	34	2	1	5	19	3	0	1	36	19	0	51	1	6	0	0	0	0	0	0	0	0	0	0	0	0	0	0	0	0	0	0	0	0	2	25	0	3	1	20	2	15	4
Bacteria;Proteobacteria;Betaproteobacteria;Burkholderiales;Sutterellaceae;Parasutterella;Parasutterella_excrementihominis	0	0	0	0	0	0	0	0	0	0	0	0	0	0	0	0	0	0	0	0	0	0	0	0	0	9	15	9	22	72	1	63	100	124	18	29	18	47	45	131	0	0	0	0	0	0	0	0	0
Bacteria;Proteobacteria;Betaproteobacteria;Burkholderiales;Sutterellaceae;Parasutterella;Parasutterella_secunda	152	4	223	17	9	29	117	14	22	11	61	11	15	1	58	46	3	137	2	9	0	0	0	0	0	0	0	0	0	0	0	0	0	171	12	0	0	0	0	0	3	77	9	27	12	61	5	40	17
Bacteria;Proteobacteria;Betaproteobacteria;Burkholderiales;Sutterellaceae;Sutterella;Sutterella_parvirubra	0	0	0	0	0	0	0	0	0	0	0	0	0	0	0	0	0	0	0	0	0	0	0	0	0	0	0	0	0	0	0	0	0	0	0	0	0	0	0	0	0	0	0	0	0	0	0	0	1
Bacteria;Proteobacteria;Betaproteobacteria;Burkholderiales;Sutterellaceae;Sutterella;Sutterella_stercoricanis	69	3	76	1	4	0	8	1	5	2	18	4	1	2	21	18	0	37	0	3	0	0	0	0	0	0	0	0	0	0	0	0	0	0	0	0	0	0	0	0	0	16	0	0	0	63	5	30	10
Bacteria;Proteobacteria;Betaproteobacteria;Nitrosomonadales;Nitrosomonadaceae;Nitrosomonas;Other	0	1	1	0	0	1	0	0	0	0	7	1	0	0	3	1	0	0	0	0	0	0	0	0	0	0	0	0	0	0	0	0	0	0	0	0	0	0	0	0	0	2	0	0	0	3	0	1	1
Bacteria;Proteobacteria;Deltaproteobacteria;Bdellovibrionales;Bdellovibrionaceae;Vampirovibrio;Vampirovibrio_chlorellavorus	0	0	4	0	0	0	8	0	0	0	1	0	1	0	1	0	1	0	0	1	0	0	0	0	0	0	0	0	0	0	0	0	0	0	0	0	0	0	0	0	0	0	0	0	0	0	0	0	0
Bacteria;Proteobacteria;Deltaproteobacteria;Desulfovibrionales;Desulfovibrionaceae;Bilophila;Bilophila_wadsworthia	1	1	2	1	2	0	0	1	1	0	6	1	0	1	2	5	0	9	0	5	67	4	13	7	46	42	179	100	114	200	0	8	0	115	3	45	2	5	12	210	0	8	0	4	4	8	0	2	1
Bacteria;Proteobacteria;Deltaproteobacteria;Desulfovibrionales;Desulfovibrionaceae;Desulfovibrio;Desulfovibrio_piger	427	549	707	163	237	4428	3418	863	4398	702	912	164	6	38	654	542	3	801	14	154	0	0	0	0	0	0	0	0	0	0	0	0	0	0	0	0	0	0	0	0	66	1148	14	151	185	1108	58	506	250
Bacteria;Proteobacteria;Deltaproteobacteria;Desulfovibrionales;Desulfovibrionaceae;Desulfovibrio;Desulfovibrio_simplex	118	30	133	41	26	58	41	91	64	12	54	12	1	12	57	76	5	129	5	39	0	1	0	0	0	1	0	0	0	6	0	8	0	0	0	93	70	58	139	151	17	47	33	131	48	46	5	37	33
Bacteria;Proteobacteria;Deltaproteobacteria;Desulfovibrionales;Desulfovibrionaceae;Desulfovibrio;Other	192	438	80	98	76	3559	1078	3231	4729	5201	318	75	31	32	171	243	10	95	9	30	0	0	1	0	0	0	0	1	0	3	0	0	0	0	0	19	0	5	0	14	43	74	40	27	25	378	31	227	111
Bacteria;Proteobacteria;Deltaproteobacteria;Desulfovibrionales;Desulfovibrionaceae;Lawsonia;Lawsonia_intracellularis	1	0	1	0	0	0	0	0	0	0	0	41	22	13	5	0	0	0	0	45	0	0	0	0	0	0	0	0	0	0	0	0	0	0	0	0	0	0	0	0	0	0	0	0	0	0	0	0	0
Bacteria;Proteobacteria;Deltaproteobacteria;Desulfovibrionales;Other;Other;Other	0	0	0	0	0	1	2	1	3	1	0	0	0	0	0	0	0	0	0	0	0	0	0	0	0	0	0	0	0	0	0	0	0	0	0	0	0	0	0	0	0	0	0	0	0	1	0	0	0
Bacteria;Proteobacteria;Deltaproteobacteria;Other;Other;Other;Other	1858	124	958	107	97	133	597	387	239	344	251	27	195	125	177	166	58	417	88	133	47	28	9	25	24	1	11	132	27	9	0	0	0	0	0	115	101	13	46	209	54	26	342	187	130	850	228	128	174
Bacteria;Proteobacteria;Epsilonproteobacteria;Campylobacterales;Campylobacteraceae;Campylobacter;Campylobacter_jejuni	91	3	161	4	11	40	221	9	1	2	51	14	2	6	26	13	0	4	0	2	1	1	2	0	14	232	818	184	1636	4356	0	0	0	0	0	52	0	24	1	46	0	32	0	2	1	31	23	7	22
Bacteria;Proteobacteria;Epsilonproteobacteria;Campylobacterales;Helicobacteraceae;Helicobacter;Helicobacter_pullorum	90	3	18	3	5	4	49	1	6	14	21	2	0	1	42	72	0	103	1	13	352	1	6	6	454	23	121	10	116	190	2	43	1127	2635	3	23	1	3	0	89	1	45	0	11	4	38	4	84	2
Bacteria;Proteobacteria;Epsilonproteobacteria;Campylobacterales;Helicobacteraceae;Helicobacter;Other	0	0	0	0	0	0	0	0	0	0	1	4	0	0	0	0	0	0	0	0	0	0	0	0	0	0	0	0	0	0	0	0	0	0	0	0	0	0	0	0	0	0	0	0	0	0	0	0	0
Bacteria;Proteobacteria;Gammaproteobacteria;Aeromonadales;Succinivibrionaceae;Anaerobiospirillum;Anaerobiospirillum_succiniciproducens	0	0	0	0	0	0	0	0	0	0	0	0	0	0	0	2	0	0	0	0	0	0	0	0	0	0	0	0	0	0	0	0	0	0	0	0	0	0	0	0	1	1	1	0	0	0	0	0	0
Bacteria;Proteobacteria;Gammaproteobacteria;Aeromonadales;Succinivibrionaceae;Anaerobiospirillum;Other	1	17	3	1	0	18	63	16	16	2	25	4	0	6	1	8	0	0	0	4	0	0	0	0	0	0	0	0	0	0	0	0	0	0	0	0	0	0	0	0	1	0	0	0	0	1	0	0	0
Bacteria;Proteobacteria;Gammaproteobacteria;Aeromonadales;Succinivibrionaceae;Succinatimonas;Succinatimonas_hippei	136	3	75	1	7	46	42	22	14	1	31	20	1	1	32	16	0	50	1	11	0	0	0	0	0	0	0	0	0	0	0	0	0	0	0	0	0	0	0	0	0	2	0	14	2	21	4	28	4
Bacteria;Proteobacteria;Gammaproteobacteria;Enterobacteriales;Enterobacteriaceae;Escherichia;Escherichia	3	1	3	0	2	63	25	57	224	682	7	10	21	31	9	10	292	2	6	43	111	3357	107	120	82	27	51	181	608	91	285	104	238	391	56	36	202	70	424	68	3	0	20	87	157	36	58	13	3
Bacteria;Proteobacteria;Gammaproteobacteria;Enterobacteriales;Enterobacteriaceae;Klebsiella;Other	0	0	0	0	0	0	0	0	0	0	1	0	0	0	0	0	1	0	0	0	0	1	0	1	0	0	0	0	0	0	0	0	0	0	0	0	0	0	0	0	0	0	0	0	0	0	0	0	0
Bacteria;Proteobacteria;Gammaproteobacteria;Other;Other;Other;Other	84	2	0	1	14	53	92	86	28	1	21	0	6	0	59	0	0	0	0	3	0	0	0	0	0	0	0	0	0	0	0	0	0	0	0	0	0	0	0	0	0	0	0	0	0	24	2	64	0
Bacteria;Proteobacteria;Gammaproteobacteria;Pasteurellales;Pasteurellaceae;Gallibacterium;Gallibacterium_anatis	5	0	3	0	0	0	1	3	1	0	9	0	0	0	3	1	0	0	0	0	0	0	0	0	0	0	0	0	0	0	0	0	0	0	0	1	0	0	0	1	0	2	0	0	0	10	0	2	0
Bacteria;Proteobacteria;Other;Other;Other;Other;Other	37	13	17	3	1	98	15	18	17	85	11	1	39	16	18	45	7	17	18	23	0	0	0	0	1	0	1	0	0	0	2	0	0	0	0	3	9	2	6	9	2	2	49	56	51	14	8	14	15
Bacteria;Spirochaetes;Spirochaetia;Spirochaetales;Brachyspiraceae;Brachyspira;Brachyspira_pilosicoli	0	0	0	0	5	0	0	0	0	0	0	0	0	0	0	0	0	0	0	0	0	0	0	0	0	0	0	0	0	0	0	0	0	0	0	0	0	0	0	0	0	0	0	0	0	0	0	0	0
Bacteria;Spirochaetes;Spirochaetia;Spirochaetales;Spirochaetaceae;Sphaerochaeta;Other	139	1	72	0	9	0	0	1	0	0	8	30	10	4	16	142	2	28	0	253	0	0	0	0	0	0	0	0	0	0	0	0	0	0	0	0	0	0	0	0	2	62	1	0	1	15	3	12	0
Bacteria;Spirochaetes;Spirochaetia;Spirochaetales;Spirochaetaceae;Sphaerochaeta;Sphaerochaeta_coccoides	0	0	0	0	0	0	0	0	0	0	12	0	0	1	6	0	0	0	0	0	0	0	0	0	0	0	0	0	0	0	0	0	0	0	0	0	0	0	0	0	0	0	0	0	0	0	0	0	0
Bacteria;Spirochaetes;Spirochaetia;Spirochaetales;Spirochaetaceae;Spirochaeta;Other	0	0	0	0	0	0	0	0	0	0	0	0	0	0	0	5	0	0	4	0	0	0	0	0	0	0	0	0	0	0	0	0	0	0	0	0	0	0	0	0	0	9	0	0	0	0	0	0	0
Bacteria;Spirochaetes;Spirochaetia;Spirochaetales;Spirochaetaceae;Treponema;Other	0	0	0	0	0	0	0	0	0	0	0	0	0	0	0	0	0	0	0	0	0	0	0	2	0	0	0	0	0	0	0	0	0	0	0	0	0	0	0	0	0	0	0	0	0	0	0	0	0
Bacteria;Spirochaetes;Spirochaetia;Spirochaetales;Spirochaetaceae;Treponema;Treponema_brennaborense	0	0	0	0	0	0	0	0	0	0	0	0	0	0	0	21	1	0	0	1	0	0	0	0	0	0	0	0	0	0	0	0	0	0	0	0	0	0	0	0	21	131	0	0	0	0	0	0	0
Bacteria;Spirochaetes;Spirochaetia;Spirochaetales;Spirochaetaceae;Treponema;Treponema_zuelzerae	0	0	0	1	1	0	0	0	0	0	16	1	2	14	5	25	0	0	0	0	0	0	0	0	0	0	0	0	0	0	0	0	0	0	0	0	0	0	0	0	3	9	1	2	0	0	0	0	0
Bacteria;Synergistetes;Synergistia;Synergistales;Synergistaceae;Cloacibacillus;Cloacibacillus_porcorum	6044	20778	3678	20859	8329	9290	4491	14761	15066	14046	2292	1904	9267	7549	1360	3901	18320	1769	10015	5491	0	1	2	0	7	0	1	1	0	1	0	1	1	0	1	0	1	0	0	3	5869	1349	9530	4026	6408	2660	8904	4507	3873
Bacteria;Synergistetes;Synergistia;Synergistales;Synergistaceae;Cloacibacillus;Other	252	5391	325	3841	852	391	417	1098	910	529	183	213	2001	433	197	188	447	158	934	890	0	0	0	0	0	0	0	0	0	0	0	0	0	0	0	0	0	0	0	0	39	15	1157	1312	835	303	2308	457	727
Bacteria;Synergistetes;Synergistia;Synergistales;Synergistaceae;Other;Other	59	164	44	105	61	117	71	149	149	148	105	140	92	109	51	141	62	48	131	136	5	9	0	30	2	46	81	31	19	9	0	16	1	1	0	40	10	36	36	36	99	81	195	143	175	37	65	104	174
Bacteria;Tenericutes;Mollicutes;Acholeplasmatales;Acholeplasmataceae;Acholeplasma;Other	0	0	3	0	0	0	0	0	0	0	0	0	0	0	0	0	0	0	0	0	0	0	0	0	0	0	0	0	0	0	0	0	0	0	0	0	0	0	0	3	0	0	0	0	0	2	0	1	0
Bacteria;Tenericutes;Mollicutes;Anaeroplasmatales;Anaeroplasmataceae;Anaeroplasma;Anaeroplasma_abactoclasticum	0	0	0	0	0	0	0	0	0	0	1	1	0	0	0	0	0	0	0	0	27	0	9	0	6	1	19	19	1	27	0	16	30	63	0	4	0	13	0	10	0	0	0	0	0	0	0	0	0
Bacteria;Tenericutes;Mollicutes;Mycoplasmatales;Mycoplasmataceae;Ureaplasma;Ureaplasma_felinum	0	0	0	0	0	0	0	0	0	0	0	0	0	0	0	0	0	0	0	0	4	0	0	0	14	0	0	0	0	0	0	0	0	0	0	0	0	0	0	0	0	0	0	0	0	0	0	0	0
Bacteria;Tenericutes;Mollicutes;Other;Other;Other;Other	0	0	2	0	0	2	1	5	0	0	2	0	1	1	1	0	0	1	1	0	0	0	0	0	0	0	0	0	0	0	0	0	0	0	0	0	0	0	0	0	0	0	1	3	4	4	4	0	0
Bacteria;Verrucomicrobia;Opitutae;Puniceicoccales;Puniceicoccaceae;Other;Other	0	0	0	0	1	1	1	0	0	3	1	0	3	0	5	5	0	2	0	1	0	0	0	0	0	0	0	0	0	0	0	0	0	0	0	0	0	0	0	0	0	3	0	0	0	0	0	1	0
Bacteria;Verrucomicrobia;Other;Other;Other;Other;Other	19	0	140	2	0	132	250	29	74	41	125	0	1	2	61	103	0	174	1	84	0	0	0	0	0	0	0	0	0	0	0	0	0	0	1	0	0	0	0	0	2	28	1	9	12	58	5	17	19
Bacteria;Verrucomicrobia;Verrucomicrobiae;Verrucomicrobiales;Verrucomicrobiaceae;Akkermansia;Akkermansia_muciniphila	19	10	3	47	58	365	40	6053	1685	4520	13	25	533	227	8	0	39	5	170	99	0	0	0	0	0	0	0	0	0	0	0	0	0	2	6	23	14	5	0	26	32	2	11	70	34	88	529	21	169
[truncated: 11 more columns]
