# Supplementary material for: Akkermansia muciniphila Enhances Resistance to Infectious Bronchitis Virus in Chickens Through γ-Aminobutyric Acid-Mediated Anti-Inflammatory Pathways
Source: Research Square preprint supplement (doi:10.21203/rs.3.rs-6786224/v1), 2025-06-25
Supplement: Supplementary file 4 [file 3c18e8262a264846c2f769ad.xlsx]

## Sheet: iphopres
Table S5. Predicted host ranges of assembled phage contigs in virome data.
contigID	Family	AAI to closest RaFAH reference	Host genus	Confidence score	List of methods	Max score
contig_1	Microviridae	3.87	d__Bacteria;p__Bacteroidota;c__Bacteroidia;o__Bacteroidales;f__Bacteroidaceae;g__Phocaeicola	96.2	CRISPR;97.30	97.3
contig_10155	Ackermannviridae	40.8	d__Bacteria;p__Pseudomonadota;c__Gammaproteobacteria;o__Pseudomonadales;f__Moraxellaceae;g__Acinetobacter	95.6	blast;96.90	96.9
contig_10345	Ackermannviridae	NA	d__Bacteria;p__Pseudomonadota;c__Gammaproteobacteria;o__Enterobacterales;f__Enterobacteriaceae;g__Lonsdalea	97.2	blast;98.00	98
contig_10345	Ackermannviridae	NA	d__Bacteria;p__Pseudomonadota;c__Gammaproteobacteria;o__Pseudomonadales;f__Moraxellaceae;g__Acinetobacter	90.2	blast;92.70	92.7
contig_10569	Ackermannviridae	NA	d__Bacteria;p__Pseudomonadota;c__Gammaproteobacteria;o__Enterobacterales;f__Enterobacteriaceae;g__Photorhabdus	91.6	blast;93.90	93.9
contig_10569	Ackermannviridae	NA	d__Bacteria;p__Pseudomonadota;c__Gammaproteobacteria;o__Enterobacterales;f__Enterobacteriaceae;g__Escherichia	91	blast;93.40	93.4
contig_10877	Microviridae	26.35	d__Bacteria;p__Bacillota_A;c__Clostridia;o__Oscillospirales;f__Ruminococcaceae;g__Faecalibacterium	91.4	iPHoP-RF;93.70 CRISPR;59.80	93.7
contig_11191	Ackermannviridae	NA	d__Bacteria;p__Pseudomonadota;c__Gammaproteobacteria;o__Pseudomonadales;f__Moraxellaceae;g__Psychrobacter	97.8	blast;98.40	98.4
contig_11231	Ackermannviridae	81.6	d__Bacteria;p__Pseudomonadota;c__Gammaproteobacteria;o__Enterobacterales_A;f__Alteromonadaceae;g__Pseudoalteromonas	97	blast;97.90	97.9
contig_11329	Ackermannviridae	81.6	d__Bacteria;p__Pseudomonadota;c__Gammaproteobacteria;o__Enterobacterales;f__Enterobacteriaceae;g__Hafnia	97.6	blast;98.30	98.3
contig_11396	Ackermannviridae	78.9	d__Bacteria;p__Pseudomonadota;c__Gammaproteobacteria;o__Enterobacterales_A;f__Aeromonadaceae;g__Aeromonas	90	blast;92.50	92.5
contig_11867	Microviridae	NA	d__Bacteria;p__Bacteroidota;c__Bacteroidia;o__Bacteroidales;f__Bacteroidaceae;g__Bacteroides	99.4	CRISPR;99.50	99.5
contig_11867	Microviridae	NA	d__Bacteria;p__Bacteroidota;c__Bacteroidia;o__Bacteroidales;f__Bacteroidaceae;g__Phocaeicola	99.4	CRISPR;99.50 iPHoP-RF;66.50	99.5
contig_11867	Microviridae	NA	d__Bacteria;p__Bacteroidota;c__Bacteroidia;o__Bacteroidales;f__Bacteroidaceae;g__Mediterranea	96.7	CRISPR;97.70 iPHoP-RF;55.40	97.7
contig_11881	Microviridae	8.62	d__Bacteria;p__Bacillota_A;c__Clostridia;o__Oscillospirales;f__Ruminococcaceae;g__Faecalibacterium	96.6	CRISPR;97.60	97.6
contig_11887	Microviridae	8.6	d__Bacteria;p__Bacillota_A;c__Clostridia;o__Oscillospirales;f__Ruminococcaceae;g__Faecalibacterium	93.9	CRISPR;95.70 iPHoP-RF;75.40	95.7
contig_11907	Ackermannviridae	25.9	d__Bacteria;p__Pseudomonadota;c__Alphaproteobacteria;o__Azospirillales;f__Azospirillaceae;g__Azospirillum	91.5	blast;93.80	93.8
contig_11912	Microviridae	6.83	d__Bacteria;p__Campylobacterota;c__Campylobacteria;o__Campylobacterales;f__Helicobacteraceae;g__Helicobacter_F	98.7	CRISPR;99.00 iPHoP-RF;64.00	99
contig_11929	Herelleviridae	NA	d__Bacteria;p__Cyanobacteriota;c__Vampirovibrionia;o__Gastranaerophilales;f__Gastranaerophilaceae;g__Stercorousia	91.5	blast;93.80	93.8
contig_1299	Microviridae	17.96	d__Bacteria;p__Bacillota_A;c__Clostridia;o__Oscillospirales;f__Ruminococcaceae;g__Faecalibacterium	99.3	CRISPR;99.40 iPHoP-RF;62.70	99.4
contig_1374	Herelleviridae	NA	d__Bacteria;p__Cyanobacteriota;c__Vampirovibrionia;o__Gastranaerophilales;f__Gastranaerophilaceae;g__Stercorousia	91.5	blast;93.80	93.8
contig_1374	Herelleviridae	NA	d__Bacteria;p__Cyanobacteriota;c__Vampirovibrionia;o__Vampirovibrionales;f__Vampirovibrionaceae;g__Vampirovibrio	90.4	blast;92.90	92.9
contig_1419	Herelleviridae	NA	d__Bacteria;p__Cyanobacteriota;c__Vampirovibrionia;o__Gastranaerophilales;f__Gastranaerophilaceae;g__Stercorousia	90.7	blast;93.10	93.1
contig_1545	Microviridae	15.67	d__Bacteria;p__Bacillota_A;c__Clostridia;o__Oscillospirales;f__Ruminococcaceae;g__Faecalibacterium	97.2	CRISPR;98.00 iPHoP-RF;64.00	98
contig_1553	Herelleviridae	NA	d__Bacteria;p__Cyanobacteriota;c__Vampirovibrionia;o__Gastranaerophilales;f__Gastranaerophilaceae;g__Stercorousia	90	blast;92.50	92.5
contig_1951	Microviridae	18.84	d__Bacteria;p__Bacillota_A;c__Clostridia;o__Oscillospirales;f__Ruminococcaceae;g__Faecalibacterium	92.1	CRISPR;94.30 iPHoP-RF;70.40	94.3
contig_2079	Microviridae	25.3	d__Bacteria;p__Bacillota_A;c__Clostridia;o__Oscillospirales;f__Ruminococcaceae;g__Faecalibacterium	95.7	CRISPR;97.00 iPHoP-RF;60.90	97
contig_2428	Herelleviridae	NA	d__Bacteria;p__Cyanobacteriota;c__Vampirovibrionia;o__Gastranaerophilales;f__Gastranaerophilaceae;g__Stercorousia	91	blast;93.40	93.4
contig_3103	Herelleviridae	NA	d__Bacteria;p__Cyanobacteriota;c__Vampirovibrionia;o__Vampirovibrionales;f__Vampirovibrionaceae;g__Vampirovibrio	93.5	blast;95.40	95.4
contig_3103	Herelleviridae	NA	d__Bacteria;p__Cyanobacteriota;c__Vampirovibrionia;o__Gastranaerophilales;f__Gastranaerophilaceae;g__Limenecus	90.8	blast;93.20	93.2
contig_3133	Microviridae	24	d__Bacteria;p__Bacillota_C;c__Negativicutes;o__Veillonellales;f__Dialisteraceae;g__Dialister	94.5	CRISPR;96.10	96.1
contig_3248	Herelleviridae	NA	d__Bacteria;p__Cyanobacteriota;c__Vampirovibrionia;o__Vampirovibrionales;f__Vampirovibrionaceae;g__JAIEMW01	93	blast;95.00	95
contig_3476	Herelleviridae	33.35	d__Bacteria;p__Bacillota;c__Bacilli;o__Paenibacillales;f__Paenibacillaceae;g__Paenibacillus	97.8	blast;98.40	98.4
contig_4005	Herelleviridae	NA	d__Bacteria;p__Cyanobacteriota;c__Vampirovibrionia;o__Gastranaerophilales;f__Gastranaerophilaceae;g__Spyradomonas	90.4	blast;92.90	92.9
contig_407	Herelleviridae	NA	d__Bacteria;p__Cyanobacteriota;c__Vampirovibrionia;o__Gastranaerophilales;f__Gastranaerophilaceae;g__Stercorousia	90.2	blast;92.70	92.7
contig_419	Herelleviridae	NA	d__Bacteria;p__Campylobacterota;c__Campylobacteria;o__Campylobacterales;f__Arcobacteraceae;g__Aliarcobacter	91.8	blast;94.10	94.1
contig_4671	Ackermannviridae	NA	d__Bacteria;p__Pseudomonadota;c__Gammaproteobacteria;o__Enterobacterales;f__Enterobacteriaceae;g__Atlantibacter	93.2	blast;95.20	95.2
contig_4671	Ackermannviridae	NA	d__Bacteria;p__Pseudomonadota;c__Gammaproteobacteria;o__Enterobacterales;f__Enterobacteriaceae;g__Franconibacter	93	blast;95.00	95
contig_4671	Ackermannviridae	NA	d__Bacteria;p__Pseudomonadota;c__Gammaproteobacteria;o__Enterobacterales;f__Enterobacteriaceae;g__Buttiauxella	92.2	blast;94.40	94.4
contig_4699	Ackermannviridae	78.5	d__Bacteria;p__Pseudomonadota;c__Alphaproteobacteria;o__DSM-16000;f__Inquilinaceae;g__Inquilinus	91	blast;93.40	93.4
contig_4793	Microviridae	15.17	d__Bacteria;p__Bacillota_A;c__Clostridia;o__Oscillospirales;f__Ruminococcaceae;g__Faecalibacterium	94.7	CRISPR;96.30	96.3
contig_5054	Herelleviridae	NA	d__Bacteria;p__Cyanobacteriota;c__Vampirovibrionia;o__Gastranaerophilales;f__Gastranaerophilaceae;g__Spyradomonas	90	blast;92.50	92.5
contig_5613	Herelleviridae	33.35	d__Bacteria;p__Bacillota;c__Bacilli;o__Paenibacillales;f__Paenibacillaceae;g__Paenibacillus	98.1	blast;98.60	98.6
contig_5903	Herelleviridae	NA	d__Bacteria;p__Bacillota;c__Bacilli;o__Lactobacillales;f__Listeriaceae;g__Listeria	98.5	blast;98.90	98.9
contig_6295	Ackermannviridae	NA	d__Bacteria;p__Pseudomonadota;c__Gammaproteobacteria;o__Enterobacterales;f__Enterobacteriaceae;g__Lonsdalea	97.5	blast;98.20 iPHoP-RF;56.20	98.2
contig_6295	Ackermannviridae	NA	d__Bacteria;p__Pseudomonadota;c__Gammaproteobacteria;o__Enterobacterales;f__Enterobacteriaceae;g__Klebsiella	93.8	blast;95.60	95.6
contig_6425	Herelleviridae	NA	d__Bacteria;p__Cyanobacteriota;c__Vampirovibrionia;o__Gastranaerophilales;f__Gastranaerophilaceae;g__Stercorousia	91.2	blast;93.60	93.6
contig_722	Microviridae	35.1	d__Bacteria;p__Bacillota_A;c__Clostridia;o__Oscillospirales;f__Ruminococcaceae;g__Faecalibacterium	94.9	CRISPR;96.40 iPHoP-RF;56.80	96.4
contig_722	Microviridae	35.1	d__Bacteria;p__Bacillota_A;c__Clostridia;o__Oscillospirales;f__Ruminococcaceae;g__Faeciplasma	92.5	CRISPR;94.60	94.6
contig_7268	Ackermannviridae	NA	d__Bacteria;p__Pseudomonadota;c__Gammaproteobacteria;o__Pseudomonadales;f__Moraxellaceae;g__Acinetobacter	91.2	blast;93.60 iPHoP-RF;57.30	93.6
contig_729	Microviridae	13.8	d__Bacteria;p__Bacillota_A;c__Clostridia;o__Oscillospirales;f__Ruminococcaceae;g__Faecalibacterium	96.4	CRISPR;97.50	97.5
contig_736	Microviridae	24.8	d__Bacteria;p__Bacillota_A;c__Clostridia;o__Oscillospirales;f__Ruminococcaceae;g__Faecalibacterium	97.8	CRISPR;98.40	98.4
contig_740	Microviridae	15.68	d__Bacteria;p__Bacillota_A;c__Clostridia;o__Oscillospirales;f__Ruminococcaceae;g__Faecalibacterium	97.2	CRISPR;98.00	98
contig_7935	Microviridae	41.4	d__Bacteria;p__Pseudomonadota;c__Gammaproteobacteria;o__Burkholderiales;f__Burkholderiaceae_A;g__Duodenibacillus	96.9	CRISPR;97.80	97.8
contig_8317	Herelleviridae	NA	d__Bacteria;p__Bacillota_A;c__Clostridia;o__Oscillospirales;f__Acutalibacteraceae;g__Caproicibacterium	90.1	blast;92.60	92.6
contig_8358	Microviridae	NA	d__Bacteria;p__Bacillota_A;c__Clostridia;o__Lachnospirales;f__Lachnospiraceae;g__Mediterraneibacter	92.6	iPHoP-RF;94.70 CRISPR;92.70	94.7
contig_838	Microviridae	8.06	d__Bacteria;p__Bacillota_A;c__Clostridia;o__Oscillospirales;f__Ruminococcaceae;g__Faecalibacterium	97.5	CRISPR;98.20	98.2
contig_880	Microviridae	NA	d__Bacteria;p__Bacteroidota;c__Bacteroidia;o__Bacteroidales;f__Bacteroidaceae;g__Mediterranea	97.9	CRISPR;98.50 iPHoP-RF;72.60	98.5
contig_880	Microviridae	NA	d__Bacteria;p__Bacteroidota;c__Bacteroidia;o__Bacteroidales;f__Bacteroidaceae;g__Phocaeicola	97.6	CRISPR;98.30 iPHoP-RF;77.30	98.3
contig_880	Microviridae	NA	d__Bacteria;p__Bacteroidota;c__Bacteroidia;o__Bacteroidales;f__Bacteroidaceae;g__Bacteroides	97.3	CRISPR;98.10 iPHoP-RF;79.00	98.1
contig_888	Microviridae	7.1	d__Bacteria;p__Bacteroidota;c__Bacteroidia;o__Bacteroidales;f__Bacteroidaceae;g__Phocaeicola	98.5	CRISPR;98.90 iPHoP-RF;72.40	98.9
contig_888	Microviridae	7.1	d__Bacteria;p__Bacteroidota;c__Bacteroidia;o__Bacteroidales;f__Bacteroidaceae;g__Bacteroides	97.5	CRISPR;98.20 iPHoP-RF;68.40	98.2
contig_892	Microviridae	NA	d__Bacteria;p__Bacteroidota;c__Bacteroidia;o__Bacteroidales;f__Rikenellaceae;g__Alistipes	98.2	CRISPR;98.70	98.7
contig_9487	Ackermannviridae	78.9	d__Bacteria;p__Pseudomonadota;c__Gammaproteobacteria;o__Enterobacterales_A;f__Vibrionaceae;g__Vibrio	90.1	blast;92.60 iPHoP-RF;54.60	92.6
