# Supplementary material for: Akkermansia muciniphila Enhances Resistance to Infectious Bronchitis Virus in Chickens Through γ-Aminobutyric Acid-Mediated Anti-Inflammatory Pathways
Source: Research Square preprint supplement (doi:10.21203/rs.3.rs-6786224/v1), 2025-06-25
Supplement: Supplementary file 5 [file 4b83e8832b3548ef0ab1e027.xlsx]

## Sheet: 数据总表_2024b4e113001
Table S7. Expression levels and functional annotations of identified metabolites in adult, young, and young-FMT samples.
Metabolite ID	Ion Mode	RT	CalcMz	Formula	Name	Delta Mass ppm	Match	Level	Database	KEGG ID	HMDB ID	Super Class	Sub Class2	Class	Final Class	Super Pathway	Sub Pathway	Pathway	Adult1	Adult2	Adult3	Adult4	Adult5	Adult6	Adult7	Adult8	Adult9	Adult10	Adult11	Adult12	Adult13	Adult14	Adult15	Adult16	Adult17	Adult18	Adult19	Adult20	Young1	Young2	Young3	Young4	Young5	Young6	Young7	Young8	Young9	Young10	Young11
B100002	NEG	0.721	167.021	C5 H4 N4 O3	Uric acid	-0.627877	99.3687	level1	BMDB	C00366	HMDB0000289	Organoheterocyclic compounds	Purines and purine derivatives	Imidazopyrimidines	Purines and derivatives	Nucleotide metabolism	Purine metabolism	map00230 Purine metabolism; map01100 Metabolic pathways; map01120 Microbial metabolism in diverse environments; map04976 Bile secretion	898493	1.31061e+07	1.23512e+07	1.33744e+07	1.14179e+07	8.60904e+06	1.37367e+07	2.21835e+07	1.44123e+07	1.04831e+07	1.46189e+07	2.94215e+07	1.89638e+07	1.75757e+07	2.35089e+07	1.43754e+07	1.66552e+07	1.46749e+07	6.88415e+06	8.63529e+06	3.70302e+07	2.58523e+07	2.21106e+07	1.04673e+07	1.83626e+07	1.99883e+07	1.54375e+07	4.29203e+06	2.2527e+07	1.45486e+06	9.7576e+06
B100003	POS	0.675	147.077	C5 H10 N2 O3	L-Glutamine	0.696689	93.4218	level1	BMDB	C00064	HMDB0000641	Organic acids and derivatives	Amino acids, peptides, and analogues	Carboxylic acids and derivatives	Amino acids	Amino acid metabolism	Arginine biosynthesis	map00220 Arginine biosynthesis; map00230 Purine metabolism; map00240 Pyrimidine metabolism; map00250 Alanine, aspartate and glutamate metabolism; map00470 D-Amino acid metabolism; map00630 Glyoxylate and dicarboxylate metabolism; map00750 Vitamin B6 metabolism; map00910 Nitrogen metabolism; map00970 Aminoacyl-tRNA biosynthesis; map01060 Biosynthesis of plant secondary metabolites; map01100 Metabo…	1.28393e+07	9.05422e+06	4.44444e+06	5.68525e+06	3.63718e+06	1.13109e+07	1.04067e+07	9.1057e+06	5.69004e+06	5.27846e+06	2.23087e+06	2.3339e+06	2.75402e+06	5.49219e+06	3.27007e+06	1.24609e+07	5.82183e+06	8.56498e+06	6.50265e+06	7.23259e+06	9.06733e+06	2.20353e+07	2.87166e+07	4.38116e+06	3.24118e+07	4.59574e+06	3.62953e+06	4.60183e+06	4.94021e+06	3.50295e+06	1.39245e+06
B100006	NEG	0.619	191.02	C6 H8 O7	Citric acid	-0.231225	67.4445	level1	BMDB	C00158	HMDB0000094	Organic acids and derivatives	Tricarboxylic acids and derivatives	Carboxylic acids and derivatives	Organic acids	Carbohydrate metabolism	Citrate cycle (TCA cycle)	map00020 Citrate cycle (TCA cycle); map00250 Alanine, aspartate and glutamate metabolism; map00630 Glyoxylate and dicarboxylate metabolism; map00720 Carbon fixation pathways in prokaryotes; map01053 Biosynthesis of siderophore group nonribosomal peptides; map01060 Biosynthesis of plant secondary metabolites; map01061 Biosynthesis of phenylpropanoids; map01062 Biosynthesis of terpenoids and steroi…	1.04017e+06	1.9811e+06	731984	881482	1.05903e+06	1.85005e+06	1.65147e+06	1.86855e+06	4.11199e+06	952270	1.38639e+06	1.88719e+06	1.35724e+06	1.0805e+06	1.78995e+06	1.22828e+06	966969	918342	1.44717e+06	1.69897e+06	4.42258e+06	2.80902e+06	1.59167e+06	2.54705e+06	3.49617e+06	1.65669e+06	975675	2.09493e+06	705456	355851	1.91458e+06
B100007	POS	0.673	120.066	C4 H9 N O3	L-Threonine	0.427124	97.3967	level1	BMDB	C00188	HMDB0000167	Organic acids and derivatives	Amino acids, peptides, and analogues	Carboxylic acids and derivatives	Amino acids	Amino acid metabolism	Glycine, serine and threonine metabolism	map00260 Glycine, serine and threonine metabolism; map00261 Monobactam biosynthesis; map00290 Valine, leucine and isoleucine biosynthesis; map00470 D-Amino acid metabolism; map00860 Porphyrin metabolism; map00970 Aminoacyl-tRNA biosynthesis; map01060 Biosynthesis of plant secondary metabolites; map01100 Metabolic pathways; map01110 Biosynthesis of secondary metabolites; map01120 Microbial metabol…	4.42633e+07	2.13374e+07	2.56639e+07	3.29285e+07	1.82993e+07	3.55233e+07	3.06701e+07	2.88449e+07	3.49423e+07	2.81199e+07	2.42648e+07	2.03401e+07	1.75781e+07	2.52433e+07	2.2946e+07	4.03788e+07	1.65629e+07	3.26541e+07	3.14341e+07	2.78966e+07	9.82353e+07	6.16876e+07	8.22692e+07	5.59792e+07	9.52497e+07	1.19068e+08	9.15521e+07	1.20537e+08	1.46999e+08	9.55762e+07	2.51106e+07
B100008	POS	0.934	292.103	C11 H19 N O9	N-Acetylneuraminic acid	-58266.7	91.178	level1	BMDB	C19910	HMDB0000230	Organic oxygen compounds	Carbohydrates and carbohydrate conjugates	Organooxygen compounds	Carbohydrates				2.25953e+06	2.49902e+06	5.54657e+06	1.81477e+06	2.24839e+06	4.47782e+06	1.64263e+06	3.20625e+06	1.70367e+06	9.527e+06	2.58829e+06	2.80766e+06	1.48568e+06	1.15924e+06	8.91759e+06	3.09531e+06	4.55964e+06	3.37135e+06	3.03643e+06	8.12586e+06	3.30607e+06	2.27532e+06	1.43265e+06	2.02271e+06	1.34323e+06	5.6379e+06	5.6218e+06	5.44234e+06	1.72019e+07	3.64825e+07	2.71522e+06
B100012	NEG	3.266	187.097	C9 H16 O4	Azelaic acid	-0.434539	98.2455	level1	BMDB	C08261	HMDB0000784	Lipids and lipid-like molecules	Fatty acids and conjugates	Fatty Acyls	Fatty acyls[FA]				6.69735e+07	7.09079e+07	7.03608e+07	8.40356e+07	5.00809e+07	3.8115e+07	3.90402e+07	5.69408e+07	5.76045e+07	3.97765e+07	5.97466e+07	5.33568e+07	5.95138e+07	5.31399e+07	3.91678e+07	7.21231e+07	4.39415e+07	7.68892e+07	8.04532e+07	6.1697e+07	1.14112e+07	1.34072e+07	1.09233e+07	1.12711e+07	1.25307e+07	7.37849e+06	6.43826e+06	8.06475e+06	1.03406e+07	1.10933e+07	2.2744e+07
B100013	NEG	0.739	145.051	C6 H10 O4	2-Methylglutaric acid	-0.385876	74.9658	level1	BMDB		HMDB0000422	Lipids and lipid-like molecules	Fatty acids and conjugates	Fatty Acyls	Fatty acyls[FA]				2.76204e+06	3.72898e+06	4.06126e+06	2.96209e+06	4.0323e+06	4.44741e+06	3.49805e+06	3.80981e+06	3.58117e+06	2.54611e+06	3.05399e+06	3.58524e+06	3.15449e+06	3.16991e+06	2.81841e+06	4.02853e+06	4.94631e+06	3.47368e+06	3.57191e+06	4.20815e+06	3.1174e+06	4.26515e+06	1.65045e+06	1.07174e+06	2.64609e+06	1.60991e+06	6.65508e+06	3.86957e+06	1.01387e+07	1.73953e+07	2.49739e+06
B100015	POS	4.852	215.139	C10 H18 N2 O3	Dethiobiotin	0.906681	93.3319	level1	BMDB	C01909	HMDB0003581	Lipids and lipid-like molecules	Fatty acids and conjugates	Fatty Acyls	Fatty acyls[FA]	Metabolism of cofactors and vitamins	Biotin metabolism	map00780 Biotin metabolism; map01100 Metabolic pathways; map01240 Biosynthesis of cofactors	2.04273e+06	2.46885e+06	2.08078e+06	2.25272e+06	964216	1.68262e+06	2.81341e+06	1.58146e+06	2.2082e+06	2.64711e+06	1.0053e+06	2.08326e+06	2.3015e+06	1.56724e+06	1.56545e+06	2.51229e+06	1.19709e+06	2.51545e+06	3.00745e+06	1.92161e+06	1.11938e+06	379405	1.82793e+06	1.19229e+06	1.41806e+06	861222	1.03587e+06	2.12309e+06	3.03893e+06	2.02914e+06	1.15961e+06
B100017	NEG	0.626	145.014	C5 H6 O5	Oxoglutaric acid	-0.259569	85.1596	level1	BMDB	C00026	HMDB0000208	Organic acids and derivatives	Gamma-keto acids and derivatives	Keto acids and derivatives	Organic acids	Carbohydrate metabolism	Citrate cycle (TCA cycle)	map00020 Citrate cycle (TCA cycle); map00040 Pentose and glucuronate interconversions; map00053 Ascorbate and aldarate metabolism; map00220 Arginine biosynthesis; map00250 Alanine, aspartate and glutamate metabolism; map00300 Lysine biosynthesis; map00310 Lysine degradation; map00340 Histidine metabolism; map00365 Furfural degradation; map00430 Taurine and hypotaurine metabolism; map00470 D-Amino…	3.5739e+06	1.18002e+07	8.13067e+06	1.49038e+07	7.47434e+06	6.16658e+06	4.83379e+06	1.20758e+07	1.50137e+07	6.67915e+06	1.23692e+07	1.18812e+07	1.29844e+07	9.1823e+06	9.79346e+06	7.79813e+06	8.2656e+06	1.12605e+07	1.90727e+07	1.20552e+07	1.72973e+07	1.53395e+06	1.28917e+06	1.34309e+07	746947	7.08039e+06	7.35063e+06	6.78594e+06	1.18851e+07	2.30232e+07	1.09695e+07
B100021	POS	3.189	112.051	C4 H5 N3 O	Cytosine	1.94992	92.2341	level1	BMDB	C00380	HMDB0000630	Organoheterocyclic compounds	Pyrimidines and pyrimidine derivatives	Diazines	Pyrimidines and pyrimidine derivatives	Nucleotide metabolism	Pyrimidine metabolism	map00240 Pyrimidine metabolism; map01100 Metabolic pathways; map01232 Nucleotide metabolism	37529.5	49981	27532.4	70938.2	63419.5	55248.4	139067	71065.5	114897	106994	108676	31249.4	22475.5	75355.9	72660.8	27211.1	116084	84786.9	129782	105538	722786	724333	2.77198e+06	2.68696e+06	1.06328e+06	573269	599181	388843	631570	798064	618398
B100022	POS	0.657	106.05	C3 H7 N O3	L-Serine	2.7048	92.2772	level1	BMDB	C00065	HMDB0000187	Organic acids and derivatives	Amino acids, peptides, and analogues	Carboxylic acids and derivatives	Amino acids	Amino acid metabolism	Glycine, serine and threonine metabolism	map00260 Glycine, serine and threonine metabolism; map00261 Monobactam biosynthesis; map00270 Cysteine and methionine metabolism; map00460 Cyanoamino acid metabolism; map00470 D-Amino acid metabolism; map00564 Glycerophospholipid metabolism; map00600 Sphingolipid metabolism; map00630 Glyoxylate and dicarboxylate metabolism; map00680 Methane metabolism; map00920 Sulfur metabolism; map00970 Aminoac…	6.82418e+06	4.43041e+06	4.16104e+06	3.76836e+06	3.31902e+06	5.53975e+06	6.70762e+06	4.92479e+06	4.59344e+06	2.45849e+06	3.36107e+06	2.15486e+06	2.68432e+06	2.21337e+06	3.85656e+06	5.05139e+06	2.39008e+06	2.56178e+06	2.52263e+06	4.29916e+06	1.88314e+07	1.72145e+07	1.58535e+07	1.61137e+07	1.80935e+07	3.02855e+07	3.02085e+07	8.31022e+06	2.36481e+07	2.51509e+07	1.01233e+07
B100024	POS	0.677	176.103	C6 H13 N3 O3	Citrulline	0.118655	96.6178	level1	BMDB	C00327	HMDB0000904	Organic acids and derivatives	Amino acids, peptides, and analogues	Carboxylic acids and derivatives	Amino acids, peptides, and analogues	Amino acid metabolism	Arginine biosynthesis	map00220 Arginine biosynthesis; map01100 Metabolic pathways; map01110 Biosynthesis of secondary metabolites; map01230 Biosynthesis of amino acids	3.4416e+08	2.72793e+08	2.31943e+08	2.73371e+08	3.08166e+08	3.76995e+08	2.76494e+08	1.59778e+08	2.13085e+08	1.56211e+08	1.9053e+08	2.63803e+08	1.79918e+08	2.90159e+08	2.41056e+08	2.05771e+08	2.24856e+08	1.11125e+08	1.6993e+08	1.59666e+08	8.28871e+08	5.59341e+08	4.38196e+08	97808.8	7.42556e+08	7.53931e+08	6.04971e+08	8.7637e+08	4.56784e+08	3.64991e+08	2.68853e+08
B100026	NEG	2.113	267.073	C10 H12 N4 O5	Inosine	-1.94184	81.9597	level1	BMDB	C00294	HMDB0000195	Nucleosides, nucleotides, and analogues		Purine nucleosides	Purines and derivatives	Nucleotide metabolism	Purine metabolism	map00230 Purine metabolism; map01100 Metabolic pathways; map01232 Nucleotide metabolism; map02010 ABC transporters	2.44498e+07	2.35334e+07	1.34788e+07	1.60071e+07	4.15326e+07	2.62541e+07	1.55848e+07	1.70818e+07	1.87701e+07	1.95314e+07	3.24126e+07	3.87752e+07	2.81412e+07	4.40217e+07	4.5288e+06	1.41583e+07	2.32799e+07	1.4196e+07	1.89634e+07	2.25142e+06	5.31277e+07	2.56713e+07	3.21829e+07	1.68683e+07	4.13879e+07	7.46756e+07	8.59125e+07	3.81043e+07	6.08387e+07	1.10938e+08	3.00124e+07
B100027	POS	3.323	147.065	C6 H10 O4	Adipic acid	2.09063	95.5254	level1	BMDB	C06104	HMDB0000448	Lipids and lipid-like molecules	Fatty acids and conjugates	Fatty Acyls	Fatty acyls[FA]	Xenobiotics biodegradation and metabolism	Caprolactam degradation	map00930 Caprolactam degradation; map01100 Metabolic pathways; map01120 Microbial metabolism in diverse environments; map01220 Degradation of aromatic compounds	3.74524e+06	4.52969e+06	4.20045e+06	5.10479e+06	3.15467e+06	2.23607e+06	3.34166e+06	3.72996e+06	3.72827e+06	2.36962e+06	3.59812e+06	3.2328e+06	4.28128e+06	2.76501e+06	2.90147e+06	5.75366e+06	2.65756e+06	2.8278e+06	3.71878e+06	3.56746e+06	664922	1.69015e+06	931643	706942	831795	303514	186811	93115.7	671676	582628	1.50827e+06
B100030	POS	8.834	410.327	C24 H40 O4	Chenodeoxycholic acid	-0.318644	92.4923	level1	BMDB	C02528	HMDB0000518	Lipids and lipid-like molecules	Bile acids, alcohols and derivatives	Steroids and steroid derivatives	Bile acids, alcohols and derivatives	Lipid metabolism	Primary bile acid biosynthesis	map00120 Primary bile acid biosynthesis; map00121 Secondary bile acid biosynthesis; map01100 Metabolic pathways; map04976 Bile secretion	241538	214933	164622	205593	274050	701435	313627	267443	242582	287520	262063	388147	275863	260370	555173	441716	1.80607e+06	220270	307861	236870	381698	823442	1.26114e+06	1.06079e+06	1.48105e+06	1.16297e+06	1.15986e+06	2.56534e+06	1.39435e+06	1.73371e+06	783667
B100032	POS	1.33	148.061	C5 H9 N O4	L-Glutamic acid	1.90278	94.9404	level1	BMDB	C00025	HMDB0000148	Organic acids and derivatives	Amino acids, peptides, and analogues	Carboxylic acids and derivatives	Amino acids	Amino acid metabolism	Arginine biosynthesis	map00220 Arginine biosynthesis; map00250 Alanine, aspartate and glutamate metabolism; map00330 Arginine and proline metabolism; map00332 Carbapenem biosynthesis; map00340 Histidine metabolism; map00430 Taurine and hypotaurine metabolism; map00470 D-Amino acid metabolism; map00480 Glutathione metabolism; map00524 Neomycin, kanamycin and gentamicin biosynthesis; map00630 Glyoxylate and dicarboxylat…	1.16547e+07	1.08906e+07	1.18937e+07	1.32246e+07	1.11266e+07	8.6421e+06	1.06407e+07	1.0309e+07	9.09113e+06	7.36967e+06	7.88875e+06	1.13326e+07	1.30812e+07	1.05661e+07	1.25368e+07	7.21046e+06	1.39542e+07	1.08492e+07	8.62654e+06	1.01482e+07	2.05367e+07	1.50923e+07	1.09089e+07	9.52625e+06	1.71393e+07	1.18879e+07	1.0808e+07	1.29807e+07	1.95308e+07	1.42805e+07	1.37532e+07
B100034	POS	0.782	204.087	C8 H15 N O6	N-Acetyl-D-glucosamine	-81462.1	93.2375	level1	BMDB	C00140	HMDB0000215	Organic oxygen compounds	Carbohydrates and carbohydrate conjugates	Organooxygen compounds	Carbohydrates	Carbohydrate metabolism	Amino sugar and nucleotide sugar metabolism	map00520 Amino sugar and nucleotide sugar metabolism; map01100 Metabolic pathways; map01250 Biosynthesis of nucleotide sugars; map02010 ABC transporters; map02060 Phosphotransferase system (PTS)	1.13983e+08	8.00523e+07	3.65437e+07	6.50894e+07	6.37586e+07	1.04779e+08	8.92377e+07	7.95669e+07	1.08732e+08	9.05803e+07	7.35029e+07	7.58652e+07	5.97831e+07	7.45845e+07	7.43971e+07	8.17037e+07	4.97969e+07	8.1974e+07	5.64737e+07	6.32939e+07	9.6568e+07	4.50057e+07	5.031e+07	7.13261e+07	6.03136e+07	7.33001e+07	7.75977e+07	8.87483e+07	1.42577e+08	1.27077e+08	7.96319e+07
B100035	NEG	0.648	195.051	C6 H12 O7	Gluconic acid	-1.13635	99.4052	level1	BMDB	C00257	HMDB0000625	Organic oxygen compounds	Carbohydrates and carbohydrate conjugates	Organooxygen compounds	Carbohydrates	Carbohydrate metabolism	Pentose phosphate pathway	map00030 Pentose phosphate pathway; map01100 Metabolic pathways; map01110 Biosynthesis of secondary metabolites; map01120 Microbial metabolism in diverse environments; map01200 Carbon metabolism	8.46169e+07	4.9386e+07	3.56832e+07	2.52665e+07	5.60334e+07	5.32025e+07	3.22987e+07	2.97011e+07	2.18382e+07	2.09613e+07	7.15912e+07	5.46519e+07	7.3049e+07	6.09695e+07	3.50216e+07	5.23641e+07	3.59928e+07	2.92054e+07	3.99962e+07	3.9935e+07	5.71528e+06	2.59711e+07	2.2678e+06	4.18923e+06	3.57335e+06	7.52173e+06	6.70756e+06	7.61008e+06	1.38916e+07	1.34483e+07	1.15168e+07
B100039	NEG	3.803	206.082	C11 H13 N O3	N-Acetyl-L-phenylalanine	-1.19892	98.0532	level1	BMDB	C03519	HMDB0000512	Organic acids and derivatives	Amino acids, peptides, and analogues	Carboxylic acids and derivatives	Amino acids, peptides, and analogues	Amino acid metabolism	Phenylalanine metabolism	map00360 Phenylalanine metabolism; map01100 Metabolic pathways	8.57212e+06	7.60134e+06	3.81278e+06	3.34372e+06	4.56259e+06	9.64268e+06	8.19099e+06	7.08779e+06	1.05619e+07	1.19218e+07	5.11971e+06	6.87126e+06	4.68104e+06	6.61825e+06	4.66638e+06	6.88886e+06	3.66035e+06	4.48585e+06	1.33297e+07	6.00858e+06	1.55645e+07	2.67074e+07	5.37487e+07	4.61732e+07	3.32681e+07	3.99878e+07	1.74517e+07	1.75017e+07	5.72207e+06	5.68662e+06	1.52048e+07
B100040	NEG	3.247	151.04	C8 H8 O3	Mandelic acid	-0.824609	97.3163	level1	BMDB	C01984	HMDB0000703	Benzenoids		Benzene and substituted derivatives	Benzene and derivatives	Xenobiotics biodegradation and metabolism	Aminobenzoate degradation	map00627 Aminobenzoate degradation; map01120 Microbial metabolism in diverse environments	1.06955e+07	1.92205e+07	1.19301e+07	1.08401e+07	1.80946e+07	2.56081e+07	1.18977e+07	2.15402e+07	3.41222e+07	2.44141e+07	1.92238e+07	2.17308e+07	8.0283e+06	2.96843e+07	2.29259e+07	1.45032e+07	2.2042e+07	1.6522e+07	1.77867e+07	1.29244e+07	3.77695e+07	4.48745e+07	4.76425e+07	3.09863e+07	4.35314e+07	4.23344e+07	5.11143e+07	5.47667e+07	6.02132e+07	1.13965e+08	3.95484e+07
B100041	POS	1.182	153.041	C5 H4 N4 O2	Xanthine	1.60177	97.9353	level1	BMDB	C00385	HMDB0000292	Organoheterocyclic compounds	Purines and purine derivatives	Imidazopyrimidines	Purines and derivatives	Nucleotide metabolism	Purine metabolism	map00230 Purine metabolism; map00232 Caffeine metabolism; map01060 Biosynthesis of plant secondary metabolites; map01065 Biosynthesis of alkaloids derived from histidine and purine; map01100 Metabolic pathways; map01110 Biosynthesis of secondary metabolites; map01120 Microbial metabolism in diverse environments; map01232 Nucleotide metabolism	4.08991e+08	3.62797e+08	3.15719e+08	2.98408e+08	4.33193e+08	4.23153e+08	3.27726e+08	3.3048e+08	3.7188e+08	5.1096e+08	3.99427e+08	4.79253e+08	3.62019e+08	4.47197e+08	3.32939e+08	2.81823e+08	4.21095e+08	3.37728e+08	3.94518e+08	2.17517e+08	6.29608e+08	3.93959e+08	3.03695e+08	3.47771e+08	4.87135e+08	5.21074e+08	5.4816e+08	4.56072e+08	8.77781e+08	8.51855e+08	3.73575e+08
B100043	POS	0.805	150.058	C5 H11 N O2 S	L-Methionine	0.518921	94.7091	level1	BMDB	C00073	HMDB0000696	Organic acids and derivatives	Amino acids, peptides, and analogues	Carboxylic acids and derivatives	Amino acids	Amino acid metabolism	Cysteine and methionine metabolism	map00270 Cysteine and methionine metabolism; map00470 D-Amino acid metabolism; map00966 Glucosinolate biosynthesis; map00970 Aminoacyl-tRNA biosynthesis; map00999 Biosynthesis of various plant secondary metabolites; map01060 Biosynthesis of plant secondary metabolites; map01070 Biosynthesis of plant hormones; map01100 Metabolic pathways; map01110 Biosynthesis of secondary metabolites; map01210 2-…	1.62431e+08	8.12356e+07	1.17314e+08	8.29575e+07	9.44431e+07	1.22844e+08	1.40684e+08	9.23973e+07	1.01813e+08	8.05515e+07	6.07047e+07	7.39182e+07	5.74187e+07	8.26866e+07	8.53713e+07	8.91423e+07	1.00909e+08	7.27758e+07	5.47455e+07	6.58923e+07	3.53729e+08	1.64445e+08	3.25762e+08	2.49747e+08	3.3921e+08	3.13955e+08	2.01198e+08	2.85343e+08	1.09612e+08	3.87752e+07	1.09589e+08
B100044	NEG	1.863	134.047	C5 H5 N5	Adenine	0.199075	99.4938	level1	BMDB	C00147	HMDB0000034	Organoheterocyclic compounds	Purines and purine derivatives	Imidazopyrimidines	Purines and derivatives	Nucleotide metabolism	Purine metabolism	map00230 Purine metabolism; map00908 Zeatin biosynthesis; map01100 Metabolic pathways; map01110 Biosynthesis of secondary metabolites; map01232 Nucleotide metabolism	1.77463e+06	1.27162e+06	974007	2.31825e+06	509267	938524	667698	1.02573e+06	1.24099e+06	911648	909932	679366	977726	556140	638009	1.33768e+06	2.49433e+06	1.58588e+06	1.1096e+06	1.23527e+06	1.13667e+06	566883	716115	622325	844417	738450	916701	932171	5.91822e+06	1.33091e+06	772531
B100045	POS	3.487	298.097	C11 H15 N5 O3 S	5'-Methylthioadenosine	0.483023	95.9338	level1	BMDB	C00170	HMDB0001173	Nucleosides, nucleotides, and analogues	5'-deoxy-5'-thionucleosides	5'-deoxyribonucleosides	Nucleic acids and analogues	Amino acid metabolism	Cysteine and methionine metabolism	map00270 Cysteine and methionine metabolism; map00908 Zeatin biosynthesis; map01060 Biosynthesis of plant secondary metabolites; map01100 Metabolic pathways	51551.7	73637.1	108466	64933.5	123242	93673.5	131675	176256	151269	134128	80484.2	106518	70771.6	135847	213887	106856	251447	152070	123628	101937	444685	1.02339e+06	412919	542757	557028	434866	391814	477809	1.04331e+06	905627	982941
B100046	NEG	2.695	241.083	C10 H14 N2 O5	Thymidine	-1.40085	97.6499	level1	BMDB	C00214	HMDB0000273	Nucleosides, nucleotides, and analogues	Pyrimidine 2'-deoxyribonucleosides	Pyrimidine nucleosides	Nucleic acids and analogues	Nucleotide metabolism	Pyrimidine metabolism	map00240 Pyrimidine metabolism; map01100 Metabolic pathways; map01232 Nucleotide metabolism	1.59469e+07	1.42526e+07	1.46768e+07	1.95882e+07	1.6911e+07	6.40978e+06	1.18834e+07	1.0357e+07	6.93544e+06	1.30207e+07	1.64734e+07	1.36279e+07	1.6746e+07	1.10771e+07	1.52823e+07	1.26986e+07	1.50591e+07	1.19333e+07	7.97858e+06	1.55624e+07	1.09995e+07	1.7313e+07	1.23246e+07	1.6225e+07	9.15126e+06	1.68903e+07	1.52988e+07	2.00591e+07	1.24641e+07	1.7968e+07	1.0161e+07
B100047	NEG	0.716	155.01	C5 H4 N2 O4	Orotic acid	-0.200591	70.9375	level1	BMDB	C00295	HMDB0000226	Organoheterocyclic compounds	Pyrimidines and pyrimidine derivatives	Diazines	Pyrimidines and pyrimidine derivatives	Nucleotide metabolism	Pyrimidine metabolism	map00240 Pyrimidine metabolism; map01100 Metabolic pathways; map01240 Biosynthesis of cofactors	16334.2	29458.4	22083.7	16766.9	26966.4	226523	91859.8	16543.1	97366.5	28015.2	66506.7	65869.1	58422.1	66692	68131.5	15181.4	332499	29197.6	41080.5	15841	1.94226e+06	223468	202103	821336	902914	1.65147e+06	1.59552e+06	1.60004e+06	2.49021e+06	2.08575e+06	2.74759e+06
B100052	NEG	2.972	193.05	C10 H10 O4	Ferulic acid	-0.948079	96.8944	level1	BMDB	C01494	HMDB0000954	Phenylpropanoids and polyketides	Hydroxycinnamic acids and derivatives	Cinnamic acids and derivatives	Polyketides[PK]	Biosynthesis of other secondary metabolites	Phenylpropanoid biosynthesis	map00940 Phenylpropanoid biosynthesis; map01061 Biosynthesis of phenylpropanoids; map01100 Metabolic pathways; map01110 Biosynthesis of secondary metabolites	1.62499e+06	1.56421e+06	639217	1.64141e+06	408057	419686	473707	392276	650651	599729	455766	320316	413114	858439	332906	386744	210150	344378	472943	397827	445710	338249	2.45877e+06	4.66371e+06	995036	313240	276998	503257	337055	356744	593145
B100056	NEG	3.079	203.082	C11 H12 N2 O2	L-Tryptophan	-0.69222	98.8265	level1	BMDB	C00078	HMDB0000929	Organoheterocyclic compounds	Indolyl carboxylic acids and derivatives	Indoles and derivatives	Amino acids	Amino acid metabolism	Glycine, serine and threonine metabolism	map00260 Glycine, serine and threonine metabolism; map00380 Tryptophan metabolism; map00400 Phenylalanine, tyrosine and tryptophan biosynthesis; map00404 Staurosporine biosynthesis; map00901 Indole alkaloid biosynthesis; map00966 Glucosinolate biosynthesis; map00970 Aminoacyl-tRNA biosynthesis; map00996 Biosynthesis of various alkaloids; map00997 Biosynthesis of various other secondary metabolite…	1.06515e+07	5.17086e+06	3.28964e+06	4.47644e+06	2.60067e+06	4.07787e+06	4.40831e+06	3.25951e+06	3.59777e+06	4.05606e+06	1.75848e+06	3.01507e+06	2.06151e+06	3.47263e+06	2.62152e+06	4.46545e+06	2.86526e+06	4.08432e+06	3.61435e+06	2.46076e+06	2.35141e+07	1.50025e+07	3.01519e+07	1.15219e+07	3.90386e+07	3.84812e+07	2.06488e+07	4.31105e+07	1.4106e+07	6.34861e+06	7.63205e+06
B100058	NEG	1.37	243.062	C9 H12 N2 O6	Uridine	-2.14871	93.9551	level1	BMDB	C00299	HMDB0000296	Nucleosides, nucleotides, and analogues		Pyrimidine nucleosides	Nucleic acids and analogues	Nucleotide metabolism	Pyrimidine metabolism	map00240 Pyrimidine metabolism; map01100 Metabolic pathways; map01232 Nucleotide metabolism; map02010 ABC transporters	7.10238e+07	4.66507e+07	4.26508e+07	2.46618e+07	1.86681e+07	1.96046e+07	1.97881e+07	1.69172e+07	2.3469e+07	3.0061e+07	2.47281e+07	1.78394e+07	1.32089e+07	2.51843e+07	1.86131e+07	3.22745e+07	2.01906e+07	1.12308e+07	1.53254e+07	1.09739e+07	1.34756e+07	1.25507e+07	1.45001e+07	1.36168e+07	2.33038e+07	2.30348e+07	6.33169e+06	2.67053e+07	1.22581e+07	1.54324e+07	942338
B100061	NEG	0.638	117.019	C4 H6 O4	Succinic acid	-0.0901576	99.9408	level1	BMDB	C00042	HMDB0000254	Organic acids and derivatives	Dicarboxylic acids and derivatives	Carboxylic acids and derivatives	Organic acids	Carbohydrate metabolism	Citrate cycle (TCA cycle)	map00020 Citrate cycle (TCA cycle); map00190 Oxidative phosphorylation; map00250 Alanine, aspartate and glutamate metabolism; map00310 Lysine degradation; map00350 Tyrosine metabolism; map00360 Phenylalanine metabolism; map00361 Chlorocyclohexane and chlorobenzene degradation; map00620 Pyruvate metabolism; map00630 Glyoxylate and dicarboxylate metabolism; map00640 Propanoate metabolism; map00650 …	1.45842e+07	2.44971e+07	1.74374e+07	1.54536e+07	1.1241e+07	1.7364e+07	1.55166e+07	2.20405e+07	2.62927e+07	1.12975e+07	1.42457e+07	2.1631e+07	1.65202e+07	1.7601e+07	1.80391e+07	1.24032e+07	1.72671e+07	1.55807e+07	1.19272e+07	1.50529e+07	5.01313e+07	9.62744e+07	3.9871e+08	9.14242e+07	8.68948e+07	2.71545e+07	2.20775e+07	2.54665e+07	2.5571e+07	2.44969e+07	1.73658e+07
B100064	NEG	2.56	164.072	C9 H11 N O2	L-Phenylalanine	-0.225787	99.0445	level1	BMDB	C00079	HMDB0000159	Organic acids and derivatives	Amino acids, peptides, and analogues	Carboxylic acids and derivatives	Amino acids	Amino acid metabolism	Phenylalanine metabolism	map00360 Phenylalanine metabolism; map00400 Phenylalanine, tyrosine and tryptophan biosynthesis; map00460 Cyanoamino acid metabolism; map00470 D-Amino acid metabolism; map00940 Phenylpropanoid biosynthesis; map00960 Tropane, piperidine and pyridine alkaloid biosynthesis; map00966 Glucosinolate biosynthesis; map00970 Aminoacyl-tRNA biosynthesis; map00996 Biosynthesis of various alkaloids; map00997…	8.42001e+07	4.06153e+07	3.15124e+07	3.98274e+07	4.21219e+07	6.7608e+07	5.63444e+07	3.15171e+07	4.06772e+07	3.54312e+07	2.81685e+07	3.8918e+07	2.10067e+07	4.45207e+07	4.73066e+07	4.06909e+07	4.81762e+07	3.47441e+07	3.56661e+07	2.7791e+07	2.40207e+08	2.34196e+08	2.31153e+08	1.68252e+08	3.45338e+08	3.53059e+08	1.89405e+08	2.83083e+08	1.35848e+08	6.67587e+07	7.22173e+07
B100066	NEG	0.637	132.03	C4 H7 N O4	L-Aspartic acid	-0.330109	93.0457	level1	BMDB	C00049	HMDB0000191	Organic acids and derivatives	Amino acids, peptides, and analogues	Carboxylic acids and derivatives	Amino acids	Amino acid metabolism	Arginine biosynthesis	map00220 Arginine biosynthesis; map00250 Alanine, aspartate and glutamate metabolism; map00260 Glycine, serine and threonine metabolism; map00261 Monobactam biosynthesis; map00270 Cysteine and methionine metabolism; map00300 Lysine biosynthesis; map00340 Histidine metabolism; map00410 beta-Alanine metabolism; map00460 Cyanoamino acid metabolism; map00470 D-Amino acid metabolism; map00710 Carbon f…	7.62261e+06	5.7534e+06	5.81853e+06	3.8337e+06	5.05956e+06	7.1101e+06	6.95769e+06	7.22074e+06	8.22292e+06	4.78721e+06	4.97508e+06	5.32241e+06	5.1093e+06	6.18914e+06	6.59118e+06	4.59344e+06	7.70359e+06	4.85735e+06	4.36942e+06	4.16972e+06	1.97269e+07	1.11996e+07	9.66597e+06	5.9716e+06	2.26355e+07	1.69694e+07	7.61237e+06	1.91603e+07	2.0517e+07	8.15176e+06	4.30297e+06
B100068	NEG	1.116	135.031	C5 H4 N4 O	Hypoxanthine	-0.165018	99.087	level1	BMDB	C00262	HMDB0000157	Organoheterocyclic compounds	Purines and purine derivatives	Imidazopyrimidines	Purines and derivatives	Nucleotide metabolism	Purine metabolism	map00230 Purine metabolism; map01100 Metabolic pathways; map01232 Nucleotide metabolism	6.57592e+07	5.3995e+07	5.2278e+07	5.09841e+07	4.84827e+07	7.33611e+07	4.14472e+07	3.58595e+07	5.42886e+07	7.3984e+07	4.17944e+07	3.47524e+07	2.80951e+07	3.32946e+07	2.34142e+07	4.74485e+07	4.18041e+07	4.29783e+07	7.29544e+07	4.73743e+07	3.64642e+07	2.5064e+07	3.33818e+07	3.56091e+07	5.3331e+07	2.79575e+07	2.57984e+07	5.03771e+07	6.22239e+07	1.20423e+08	6.20816e+07
B100069	POS	0.696	132.077	C4 H9 N3 O2	Creatine	0.674158	95.4724	level1	BMDB	C00300	HMDB0000064	Organic acids and derivatives	Amino acids, peptides, and analogues	Carboxylic acids and derivatives	Amino acids, peptides, and analogues	Amino acid metabolism	Glycine, serine and threonine metabolism	map00260 Glycine, serine and threonine metabolism; map00330 Arginine and proline metabolism; map01100 Metabolic pathways	2.05908e+06	4.33955e+06	1.82293e+07	3.73361e+06	5.88203e+06	4.48207e+06	2.29816e+06	1.95906e+07	1.58249e+07	3.00821e+07	2.06497e+06	3.77779e+06	1.43368e+06	1.70124e+06	4.17779e+06	2.72511e+07	6.08119e+06	2.49992e+07	5.58812e+06	1.2153e+07	2.2694e+07	1.34313e+07	8.08272e+06	2.52464e+07	4.38062e+07	2.54813e+07	4.38475e+07	7.99267e+07	7.30417e+07	6.39156e+07	2.65266e+07
B100075	POS	4.225	175.087	C10 H10 N2 O	Indole-3-acetamide	1.86411	90.6244	level1	BMDB	C02693	HMDB0029739	Organoheterocyclic compounds	Indoles	Indoles and derivatives	Indoles	Amino acid metabolism	Tryptophan metabolism	map00380 Tryptophan metabolism; map01100 Metabolic pathways	3.09432e+06	1.79903e+06	1.48641e+06	1.30966e+06	3.16245e+06	1.52638e+06	1.65237e+06	2.06429e+06	2.97147e+06	3.76116e+06	1.29155e+06	1.75665e+06	1.23406e+06	2.46272e+06	1.55627e+06	1.62077e+06	1.18897e+06	1.33164e+06	1.10658e+06	1.26307e+06	1.08883e+06	1.88214e+06	808055	1.28294e+06	1.03247e+06	4.36598e+06	2.82178e+06	1.86016e+06	2.13652e+06	1.71151e+06	391649
B100077	NEG	1.258	117.019	C4 H6 O4	Methylmalonic acid	0.264197	83.2997	level1	BMDB	C02170	HMDB0000202	Organic acids and derivatives	Dicarboxylic acids and derivatives	Carboxylic acids and derivatives	Organic acids	Nucleotide metabolism	Pyrimidine metabolism	map00240 Pyrimidine metabolism; map00280 Valine, leucine and isoleucine degradation; map00640 Propanoate metabolism; map01100 Metabolic pathways	2.25858e+06	2.90418e+06	2.00681e+06	2.73925e+06	1.64396e+06	1.77088e+06	1.82099e+06	2.14555e+06	2.54269e+06	1.81361e+06	2.07555e+06	2.28505e+06	2.22041e+06	2.03617e+06	2.71607e+06	1.68855e+06	2.02925e+06	2.41831e+06	2.1032e+06	2.20351e+06	4.41392e+06	7.75612e+06	2.14427e+07	7.77716e+06	6.49154e+06	2.45942e+06	2.38699e+06	2.18045e+06	2.87287e+06	2.89271e+06	1.7833e+06
B100085	POS	0.795	182.081	C9 H11 N O3	L-Tyrosine	1.32198	97.5598	level1	BMDB	C00082	HMDB0000158	Organic acids and derivatives	Amino acids, peptides, and analogues	Carboxylic acids and derivatives	Amino acids	Metabolism of cofactors and vitamins	Ubiquinone and other terpenoid-quinone biosynthesis	map00130 Ubiquinone and other terpenoid-quinone biosynthesis; map00261 Monobactam biosynthesis; map00350 Tyrosine metabolism; map00360 Phenylalanine metabolism; map00400 Phenylalanine, tyrosine and tryptophan biosynthesis; map00401 Novobiocin biosynthesis; map00460 Cyanoamino acid metabolism; map00680 Methane metabolism; map00730 Thiamine metabolism; map00940 Phenylpropanoid biosynthesis; map0095…	5.82053e+07	2.06578e+07	1.78272e+07	1.93032e+07	2.23653e+07	3.74092e+07	1.95993e+07	1.41602e+07	1.97922e+07	1.61213e+07	1.31474e+07	1.99745e+07	1.45036e+07	2.28216e+07	1.8699e+07	1.86131e+07	2.96209e+07	1.86315e+07	2.08587e+07	1.26178e+07	3.19267e+06	1.36403e+08	2.04341e+08	4.83993e+07	2.48291e+08	2.77394e+08	1.46984e+08	2.5214e+08	1.13768e+08	5.20278e+07	6.44448e+07
B100088	POS	1.038	102.055	C4 H9 N O3	L-Homoserine	-151274	81.8096	level1	BMDB	C00263	HMDB0000719	Organic acids and derivatives	Amino acids, peptides, and analogues	Carboxylic acids and derivatives	Amino acids, peptides, and analogues	Amino acid metabolism	Glycine, serine and threonine metabolism	map00260 Glycine, serine and threonine metabolism; map00270 Cysteine and methionine metabolism; map00300 Lysine biosynthesis; map00920 Sulfur metabolism; map01100 Metabolic pathways; map01110 Biosynthesis of secondary metabolites; map01120 Microbial metabolism in diverse environments; map01230 Biosynthesis of amino acids	6.62532e+06	6.03008e+06	4.86098e+06	5.83402e+06	4.69205e+06	6.19278e+06	5.35288e+06	5.09637e+06	6.51301e+06	6.61575e+06	4.91949e+06	4.77725e+06	4.07648e+06	5.13197e+06	5.65043e+06	5.53688e+06	4.53454e+06	5.30392e+06	5.53516e+06	4.25413e+06	1.37969e+07	1.05212e+07	1.11722e+07	9.11201e+06	1.21108e+07	1.33137e+07	8.84691e+06	1.13299e+07	7.87786e+06	6.39102e+06	5.80714e+06
B100089	POS	3.069	170.082	C8 H11 N O3	Pyridoxine	2.19642	88.1796	level1	BMDB	C00314	HMDB0000239	Organoheterocyclic compounds	Pyridoxines	Pyridines and derivatives	Pyridine and derivatives	Metabolism of cofactors and vitamins	Vitamin B6 metabolism	map00750 Vitamin B6 metabolism; map01100 Metabolic pathways; map01120 Microbial metabolism in diverse environments; map01240 Biosynthesis of cofactors	4.05307e+06	2.84305e+06	3.22836e+06	2.6636e+06	3.3401e+06	2.62232e+06	3.54742e+06	2.59816e+06	3.01668e+06	3.57606e+06	2.84234e+06	2.42753e+06	2.35317e+06	3.61245e+06	3.09812e+06	2.61508e+06	5.32107e+06	2.48301e+06	5.62881e+06	2.53919e+06	3.41326e+06	3.60891e+06	5.90035e+06	2.81645e+06	6.34854e+06	3.15502e+06	4.449e+06	4.98046e+06	5.16566e+06	8.44142e+06	2.50134e+06
B100093	NEG	0.67	131.035	C5 H8 O4	Ethylmalonic acid	-0.475927	88.0542	level1	BMDB		HMDB0000622	Lipids and lipid-like molecules	Fatty acids and conjugates	Fatty Acyls	Fatty acyls[FA]				8.14381e+06	5.60133e+06	2.5108e+06	4.41785e+06	3.52406e+06	6.34828e+06	5.89542e+06	3.50808e+06	4.7377e+06	7.834e+06	2.6107e+06	5.14339e+06	4.39539e+06	4.31093e+06	3.98554e+06	2.15136e+06	4.13612e+06	3.26799e+06	2.58774e+06	2.9521e+06	1.80726e+07	1.51283e+07	2.2236e+07	1.84778e+07	2.03886e+07	4.71001e+06	3.48093e+06	7.52545e+06	5.37871e+06	5.40892e+06	1.77953e+07
B100095	NEG	0.626	115.004	C4 H4 O4	Fumaric acid	-0.630858	94.1734	level1	BMDB	C00122	HMDB0000134	Organic acids and derivatives	Dicarboxylic acids and derivatives	Carboxylic acids and derivatives	Organic acids	Carbohydrate metabolism	Citrate cycle (TCA cycle)	map00020 Citrate cycle (TCA cycle); map00190 Oxidative phosphorylation; map00220 Arginine biosynthesis; map00250 Alanine, aspartate and glutamate metabolism; map00350 Tyrosine metabolism; map00360 Phenylalanine metabolism; map00620 Pyruvate metabolism; map00643 Styrene degradation; map00650 Butanoate metabolism; map00720 Carbon fixation pathways in prokaryotes; map00760 Nicotinate and nicotinamid…	4.32104e+06	2.92734e+06	2.80716e+06	1.61227e+06	2.71798e+06	3.95652e+06	3.09118e+06	3.45241e+06	4.14565e+06	2.75025e+06	3.78569e+06	2.73053e+06	2.85304e+06	2.93699e+06	3.23786e+06	2.72012e+06	2.8062e+06	1.86246e+06	3.41174e+06	1.89298e+06	7.03147e+06	1.00317e+07	5.25275e+06	4.78115e+06	7.41239e+06	6.94151e+06	4.68564e+06	6.7675e+06	6.9497e+06	2.2373e+06	1.49666e+06
B100096	NEG	3.823	165.056	C9 H10 O3	3-(2-Hydroxyphenyl)propanoic acid	-0.498789	99.4877	level1	BMDB	C01198	HMDB0033752	Phenylpropanoids and polyketides		Phenylpropanoic acids	Phenylpropanoic acids	Amino acid metabolism	Phenylalanine metabolism	map00360 Phenylalanine metabolism; map00624 Polycyclic aromatic hydrocarbon degradation; map00999 Biosynthesis of various plant secondary metabolites; map01100 Metabolic pathways; map01120 Microbial metabolism in diverse environments	9.53933e+06	1.1305e+07	1.24032e+07	1.00428e+07	1.0826e+07	7.82235e+06	9.73694e+06	8.0056e+06	8.60726e+06	8.05876e+06	9.8794e+06	1.27071e+07	1.01597e+07	9.50731e+06	7.34724e+06	9.01277e+06	6.5347e+06	7.1061e+06	1.10164e+07	9.59376e+06	1.1921e+06	961136	2.05341e+06	1.52847e+06	1.52676e+06	1.08181e+06	1.01916e+06	1.1511e+06	1.46858e+06	1.10001e+06	3.76852e+06
B100102	NEG	0.769	181.072	C6 H14 O6	Mannitol	-0.79989	97.1487	level1	BMDB	C00392	HMDB0000765	Organic oxygen compounds	Carbohydrates and carbohydrate conjugates	Organooxygen compounds	Carbohydrates	Carbohydrate metabolism	Fructose and mannose metabolism	map00051 Fructose and mannose metabolism; map01100 Metabolic pathways; map02010 ABC transporters; map02060 Phosphotransferase system (PTS)	11305.2	10712.3	381316	8741.29	300465	36513.1	21731.8	77641.3	57358.4	11927.5	587106	427755	9991.64	473383	10455.3	17832.6	314427	7946.53	15368.4	62290.4	7.13712e+06	1.3076e+07	7.70598e+06	5.72099e+06	8.27794e+06	9.61286e+06	1.97588e+07	1.72374e+07	4.53238e+07	2.89822e+07	211484
B100108	NEG	0.779	256.059	C8 H15 N O6	N-Acetylmannosamine	162722	84.311	level1	BMDB	C00645	HMDB0001129	Organic oxygen compounds	Carbohydrates and carbohydrate conjugates	Organooxygen compounds	Carbohydrates	Carbohydrate metabolism	Amino sugar and nucleotide sugar metabolism	map00520 Amino sugar and nucleotide sugar metabolism; map00541 O-Antigen nucleotide sugar biosynthesis; map01100 Metabolic pathways; map01250 Biosynthesis of nucleotide sugars	5.97273e+07	5.61584e+07	2.80732e+07	5.24694e+07	2.266e+07	3.00963e+07	3.94737e+07	4.0479e+07	4.18868e+07	4.54704e+07	4.54815e+07	2.81173e+07	2.76273e+07	3.5986e+07	4.86672e+07	5.91226e+07	2.03297e+07	3.94144e+07	3.47175e+07	4.33791e+07	4.25679e+07	1.38866e+07	1.70778e+07	2.81387e+07	1.85491e+07	3.64435e+07	3.11099e+07	2.17359e+07	3.72977e+07	4.07955e+07	1.72063e+07
B100112	POS	0.668	114.066	C4 H7 N3 O	Creatinine	1.71293	95.1862	level1	BMDB	C00791	HMDB0000562	Organic acids and derivatives	Amino acids, peptides, and analogues	Carboxylic acids and derivatives	Amino acids, peptides, and analogues	Amino acid metabolism	Arginine and proline metabolism	map00330 Arginine and proline metabolism; map01100 Metabolic pathways	369227	316925	899419	203600	274880	375592	332323	430406	669960	1.10169e+06	176518	317789	232507	209639	222960	1.92692e+06	474277	937823	213578	495065	575503	587354	410422	1.02225e+06	1.10907e+06	1.36231e+06	1.08763e+06	3.77537e+06	3.01362e+06	2.29109e+06	1.50943e+06
B100115	POS	5.319	120.045	C7 H7 N O2	p-Aminobenzoic acid	-131417	90.0538	level1	BMDB	C00568	HMDB0001392	Benzenoids	Benzoic acids and derivatives	Benzene and substituted derivatives	Benzene and derivatives	Xenobiotics biodegradation and metabolism	Aminobenzoate degradation	map00627 Aminobenzoate degradation; map00790 Folate biosynthesis; map01061 Biosynthesis of phenylpropanoids; map01100 Metabolic pathways; map01120 Microbial metabolism in diverse environments; map01240 Biosynthesis of cofactors	829457	841521	428898	617735	339186	486044	439472	580296	691085	949550	503565	351225	675747	469074	1.07845e+06	842269	726700	401188	688451	520467	213718	379720	342820	185950	438284	446096	328740	560449	882024	1.75798e+06	776572
B100116	POS	5.185	176.071	C10 H9 N O2	Indoleacetic acid	1.76196	91.5312	level1	BMDB	C00954	HMDB0000197	Organoheterocyclic compounds	Indolyl carboxylic acids and derivatives	Indoles and derivatives	Indole and derivatives	Amino acid metabolism	Tryptophan metabolism	map00380 Tryptophan metabolism; map01070 Biosynthesis of plant hormones; map01100 Metabolic pathways; map04075 Plant hormone signal transduction	3.50942e+07	6.15339e+07	3.38411e+07	5.65158e+07	2.87836e+07	3.55359e+07	3.48521e+07	2.43024e+07	2.99463e+07	3.83481e+07	2.43571e+07	3.84533e+07	2.82956e+07	2.92796e+07	3.69973e+07	4.52811e+07	3.02695e+07	4.03468e+07	3.382e+07	2.62635e+07	9.24225e+07	7.1322e+07	8.19089e+07	8.74132e+07	7.62413e+07	6.28336e+07	4.92936e+07	6.04247e+07	5.53638e+07	2.74911e+07	3.80882e+07
B100121	NEG	0.798	215.033	C6 H12 O6	D-Psicose	199799	61.8483	level1	BMDB	C06468	HMDB0250793	Organic oxygen compounds	Carbohydrates and carbohydrate conjugates	Organooxygen compounds	Carbohydrates				2.4415e+06	3.75076e+06	1.31588e+06	2.84774e+06	1.52245e+06	1.99693e+06	8.5509e+06	6.94499e+06	6.26332e+06	5.12408e+06	3.65422e+06	1.45808e+06	3.22645e+06	1.38827e+06	4.09714e+06	8.60018e+06	1.63587e+06	4.41098e+06	1.24909e+07	8.07924e+06	6.01317e+06	8.07198e+06	1.21249e+07	6.34905e+06	2.15499e+06	1.86571e+07	1.06761e+07	2.63903e+06	7.48565e+06	9.05261e+06	2.75399e+06
B100127	POS	4.17	161.081	C7 H12 O4	Pimelic acid	1.65001	94.5096	level1	BMDB	C02656	HMDB0000857	Lipids and lipid-like molecules	Fatty acids and conjugates	Fatty Acyls	Fatty acyls[FA]	Metabolism of cofactors and vitamins	Biotin metabolism	map00780 Biotin metabolism; map01100 Metabolic pathways; map01240 Biosynthesis of cofactors	4.42128e+07	4.29359e+07	4.5862e+07	5.50091e+07	4.30916e+07	4.17802e+07	4.29325e+07	4.51879e+07	4.69857e+07	3.87121e+07	3.79515e+07	4.95899e+07	4.95617e+07	4.63657e+07	3.96646e+07	3.88601e+07	3.7078e+07	3.87899e+07	4.61639e+07	3.57581e+07	975064	1.40353e+06	1.12837e+06	971473	933792	3.74041e+06	543401	1.78178e+06	1.19848e+06	1.31904e+06	2.12666e+07
B100131	POS	0.71	155.081	C7 H14 N2 O4	Diaminopimelic acid	-94745.1	63.4148	level1	BMDB	C00666	HMDB0001370	Organic acids and derivatives	Amino acids, peptides, and analogues	Carboxylic acids and derivatives	Amino acids, peptides, and analogues	Amino acid metabolism	Lysine biosynthesis	map00300 Lysine biosynthesis; map00470 D-Amino acid metabolism; map01100 Metabolic pathways; map01110 Biosynthesis of secondary metabolites; map01120 Microbial metabolism in diverse environments; map01230 Biosynthesis of amino acids	1.59559e+07	1.99383e+07	9.45297e+06	8.74108e+06	1.71967e+07	1.18489e+07	1.54641e+07	1.41979e+07	1.53429e+07	1.51819e+07	1.34502e+07	5.72156e+06	1.41531e+07	8.11203e+06	1.8426e+07	1.27149e+07	1.62301e+07	7.22003e+06	1.5631e+07	1.12038e+07	5.01361e+06	9.82745e+06	8.32705e+06	4.59249e+06	5.99223e+06	9.03221e+06	8.39636e+06	6.15591e+06	2.56925e+07	2.66359e+07	6.35843e+06
B100143	POS	3.011	146.118	C7 H15 N O2	4-Trimethylammoniobutanoic acid	2.16629	85.4944	level1	BMDB	C01181	HMDB0001161	Lipids and lipid-like molecules	Fatty acids and conjugates	Fatty Acyls	Fatty acyls[FA]	Amino acid metabolism	Lysine degradation	map00310 Lysine degradation; map01100 Metabolic pathways; map02010 ABC transporters	5.58569e+06	8.28045e+06	1.13439e+07	1.27262e+07	1.52813e+07	2.13468e+07	1.00212e+07	7.16759e+06	9.42893e+06	2.29098e+07	7.52849e+06	6.35832e+06	4.89986e+06	1.21133e+07	5.18618e+06	7.0553e+06	2.30422e+06	2.3153e+07	1.72909e+06	8.6584e+06	1.88068e+06	2.49263e+06	2.25173e+06	2.38839e+06	2.43419e+06	1.46931e+07	2.62926e+07	5.54444e+06	1.4436e+07	1.89019e+07	2.07371e+06
B100148	POS	0.725	131.118	C6 H14 N2 O	N-Acetylputrescine	0.755465	84.4715	level1	BMDB	C02714	HMDB0002064	Organic acids and derivatives	Carboximidic acids	Carboximidic acids and derivatives	Organic acids	Amino acid metabolism	Arginine and proline metabolism	map00330 Arginine and proline metabolism; map01100 Metabolic pathways	1.64986e+07	1.99501e+07	1.25842e+07	5.01492e+06	1.66222e+07	9.72508e+06	1.85924e+07	2.37893e+07	2.24581e+07	1.79807e+07	7.75877e+06	1.73413e+07	1.43977e+07	1.2622e+07	1.7626e+07	1.59161e+07	1.6578e+07	1.66921e+07	1.26012e+07	1.5181e+07	3.93633e+06	7.54659e+06	8.70638e+06	5.81979e+06	6.44244e+06	2.62673e+07	1.48216e+07	7.34274e+06	2.04661e+07	1.10833e+07	1.30636e+07
B100149	POS	0.703	204.087	C8 H15 N O6	N-Acetylgalactosamine	-81462.3	95.9829	level1	BMDB	C01074	HMDB0000212	Organic oxygen compounds	Carbohydrates and carbohydrate conjugates	Organooxygen compounds	Carbohydrates			map05146 Amoebiasis	2.39392e+08	1.85898e+08	1.12245e+08	2.13984e+08	1.36693e+08	2.02249e+08	2.59541e+08	2.16125e+08	2.12958e+08	1.10993e+08	2.26172e+08	1.59616e+08	1.22201e+08	1.90199e+08	1.20547e+08	2.70287e+08	1.01955e+08	2.66156e+08	1.22154e+08	1.09379e+08	2.34364e+08	8.48745e+07	5.8126e+07	1.06399e+08	1.21961e+08	2.50975e+08	2.1241e+08	1.57324e+08	2.48454e+08	4.4077e+08	1.52323e+08
B100150	POS	1.331	190.071	C7 H11 N O5	N-Acetyl-L-glutamic acid	1.64746	96.5053	level1	BMDB	C00624	HMDB0001138	Organic acids and derivatives	Amino acids, peptides, and analogues	Carboxylic acids and derivatives	Amino acids, peptides, and analogues	Amino acid metabolism	Arginine biosynthesis	map00220 Arginine biosynthesis; map00470 D-Amino acid metabolism; map01100 Metabolic pathways; map01110 Biosynthesis of secondary metabolites; map01210 2-Oxocarboxylic acid metabolism; map01230 Biosynthesis of amino acids	6.14066e+07	6.58655e+07	6.57907e+07	8.11998e+07	6.24477e+07	4.442e+07	5.94478e+07	6.2586e+07	5.21805e+07	3.71716e+07	5.16932e+07	7.03951e+07	7.38902e+07	6.06794e+07	6.28647e+07	4.90596e+07	7.16557e+07	5.17555e+07	5.70525e+07	5.65725e+07	8.47059e+07	5.35195e+07	3.25402e+07	5.91607e+07	4.70006e+07	4.14922e+07	4.26948e+07	3.06353e+07	7.49782e+07	6.03965e+07	7.5944e+07
B100153	POS	3.096	220.118	C9 H17 N O5	Pantothenic acid	1.2122	97.6136	level1	BMDB	C00864	HMDB0000210	Organic oxygen compounds	Alcohols and polyols	Organooxygen compounds	Alcohols	Metabolism of other amino acids	beta-Alanine metabolism	map00410 beta-Alanine metabolism; map00770 Pantothenate and CoA biosynthesis; map01100 Metabolic pathways; map01110 Biosynthesis of secondary metabolites; map01240 Biosynthesis of cofactors; map04977 Vitamin digestion and absorption	3.43342e+08	5.04008e+08	3.25003e+08	2.9296e+08	4.02825e+08	3.15113e+08	3.62593e+08	3.10669e+08	4.03828e+08	3.17866e+08	4.4045e+08	4.34281e+08	3.63202e+08	4.18744e+08	3.09357e+08	2.61768e+08	3.95656e+08	3.04638e+08	3.62015e+08	2.59855e+08	5.8589e+08	5.20467e+08	5.30527e+08	4.8931e+08	4.73866e+08	5.77325e+08	4.69215e+08	3.95032e+08	9.13566e+08	6.10857e+08	5.15415e+08
B100155	POS	3.191	206.045	C10 H7 N O4	Xanthurenic acid	1.53209	90.6497	level1	BMDB	C02470	HMDB0000881	Organoheterocyclic compounds	Quinoline carboxylic acids	Quinolines and derivatives	Quinoline carboxylic acids	Amino acid metabolism	Tryptophan metabolism	map00380 Tryptophan metabolism	1.10789e+06	1.61321e+06	1.67131e+06	2.06228e+06	1.70632e+06	1.60866e+06	1.62447e+06	1.84468e+06	1.54086e+06	1.48843e+06	1.58563e+06	1.64211e+06	1.44543e+06	1.2385e+06	1.60014e+06	1.35377e+06	1.33449e+06	1.29756e+06	1.52713e+06	1.72627e+06	1.01861e+06	912300	1.16315e+06	1.19491e+06	850579	1.16722e+06	809445	607382	512969	504848	2.31404e+06
B100163	NEG	8.919	437.29	C24 H40 O4	Deoxycholic acid	-0.843642	91.2408	level1	BMDB	C04483	HMDB0000626	Lipids and lipid-like molecules	Bile acids, alcohols and derivatives	Steroids and steroid derivatives	Bile acids, alcohols and derivatives	Lipid metabolism	Secondary bile acid biosynthesis	map00121 Secondary bile acid biosynthesis; map04976 Bile secretion	84212.5	98033.8	62966.1	106453	107904	312347	148099	131353	103766	112209	112475	153054	145525	118734	290578	179619	904570	104053	126937	73979.7	182474	314946	634036	499342	675138	547640	153895	984828	504040	163797	447002
B100166	POS	1.599	132.102	C6 H13 N O2	L-Isoleucine	1.69207	98.0726	level1	BMDB	C00407	HMDB0000172	Organic acids and derivatives	Amino acids, peptides, and analogues	Carboxylic acids and derivatives	Amino acids	Amino acid metabolism	Valine, leucine and isoleucine degradation	map00280 Valine, leucine and isoleucine degradation; map00290 Valine, leucine and isoleucine biosynthesis; map00460 Cyanoamino acid metabolism; map00960 Tropane, piperidine and pyridine alkaloid biosynthesis; map00966 Glucosinolate biosynthesis; map00970 Aminoacyl-tRNA biosynthesis; map01060 Biosynthesis of plant secondary metabolites; map01064 Biosynthesis of alkaloids derived from ornithine, ly…	2.90337e+09	2.0029e+09	1.6032e+09	1.67638e+09	1.77641e+09	1.84722e+09	2.29385e+09	1.52098e+09	1.70389e+09	2.1069e+09	1.63436e+09	1.64177e+09	1.15655e+09	1.92315e+09	1.74801e+09	1.83301e+09	1.09472e+09	1.53119e+09	1.12343e+09	1.35427e+09	3.77908e+09	3.64187e+09	3.69451e+09	2.68352e+09	5.20373e+09	5.38585e+09	3.24645e+09	4.04126e+09	2.07772e+09	1.33999e+09	1.64738e+09
B100167	POS	0.659	126.022	C2 H7 N O3 S	Taurine	0.827247	93.3904	level1	BMDB	C00245	HMDB0000251	Organic acids and derivatives	Organosulfonic acids and derivatives	Organic sulfonic acids and derivatives	Organic acids	Lipid metabolism	Primary bile acid biosynthesis	map00120 Primary bile acid biosynthesis; map00430 Taurine and hypotaurine metabolism; map00920 Sulfur metabolism; map01100 Metabolic pathways; map02010 ABC transporters; map04080 Neuroactive ligand-receptor interaction	9.23891e+07	9.68603e+07	6.2623e+07	1.10108e+08	2.14199e+07	3.02883e+07	8.04668e+07	5.14152e+07	4.97585e+07	6.56715e+06	5.3311e+07	4.97047e+07	6.11232e+07	4.1182e+07	3.6365e+07	1.09601e+08	2.92359e+07	8.98797e+07	1.06475e+08	5.75991e+07	5.70857e+06	6.82557e+06	3.03034e+09	2.30127e+07	8.68062e+06	1.43783e+07	1.10567e+07	1.44264e+07	1.17997e+07	2.52445e+07	1.0356e+07
B100168	POS	0.663	104.071	C4 H9 N O2	gamma-Aminobutyric acid	0.704496	78.3	level1	BMDB	C00334	HMDB0000112	Organic acids and derivatives	Amino acids, peptides, and analogues	Carboxylic acids and derivatives	Amino acids, peptides, and analogues	Amino acid metabolism	Alanine, aspartate and glutamate metabolism	map00250 Alanine, aspartate and glutamate metabolism; map00330 Arginine and proline metabolism; map00410 beta-Alanine metabolism; map00650 Butanoate metabolism; map00760 Nicotinate and nicotinamide metabolism; map01100 Metabolic pathways; map01120 Microbial metabolism in diverse environments; map02024 Quorum sensing; map04024 cAMP signaling pathway; map04080 Neuroactive ligand-receptor interactio…	25400000	31400000	22900000	14100000	25200000	27300000	46300000	46000000	146000000	111000000	33000000	6.85783e+06	8.37888e+06	9.82617e+06	41300000	10700000	15000000	15400000	15000000	15500000	6.86404e+06	10600000	6.87669e+06	11700000	8.02321e+06	5.96939e+06	5.98414e+06	4.18437e+06	3.98205e+06	3.3925e+06	5.83886e+06
B100169	POS	0.512	162.076	C6 H13 N O5	Glucosamine	-100572	75.7219	level1	BMDB	C00329	HMDB0001514	Organic oxygen compounds	Carbohydrates and carbohydrate conjugates	Organooxygen compounds	Carbohydrates	Carbohydrate metabolism	Amino sugar and nucleotide sugar metabolism	map00520 Amino sugar and nucleotide sugar metabolism; map01100 Metabolic pathways; map01250 Biosynthesis of nucleotide sugars; map02060 Phosphotransferase system (PTS)	279360	302431	276823	71418.9	260234	201873	67293.4	56299.5	255012	253315	83106.8	61174	67576.1	63025.2	79361.1	246534	268519	77546.3	65684.1	267725	61885.1	61121	58247.3	210283	190540	238899	296405	55732.2	181347	190029	194158
B100179	POS	0.623	189.16	C9 H20 N2 O2	N6,N6,N6-Trimethyl-L-lysine	0.59366	92.1868	level1	BMDB	C03793	HMDB0001325	Organic acids and derivatives	Amino acids, peptides, and analogues	Carboxylic acids and derivatives	Amino acids, peptides, and analogues	Amino acid metabolism	Lysine degradation	map00310 Lysine degradation; map01100 Metabolic pathways	1.24681e+07	8.43608e+06	8.13988e+06	1.24382e+07	1.41141e+07	1.41889e+07	1.44784e+07	7.02237e+06	1.12124e+07	9.82546e+06	6.84195e+06	7.50762e+06	4.5656e+06	8.66054e+06	7.80438e+06	7.34737e+06	8.83846e+06	7.16459e+06	6.26406e+06	5.5655e+06	1.80348e+07	1.33936e+07	1.10346e+07	1.18524e+07	2.09901e+07	2.35574e+07	2.91923e+07	7.04516e+07	2.41743e+07	1.62419e+07	6.71922e+06
B100191	POS	1.813	268.104	C10 H13 N5 O4	Adenosine	0.210267	90.5544	level1	BMDB	C00212	HMDB0000050	Nucleosides, nucleotides, and analogues		Purine nucleosides	Purines and derivatives	Nucleotide metabolism	Purine metabolism	map00230 Purine metabolism; map01100 Metabolic pathways; map01232 Nucleotide metabolism; map02010 ABC transporters; map04022 cGMP-PKG signaling pathway; map04024 cAMP signaling pathway; map04071 Sphingolipid signaling pathway; map04080 Neuroactive ligand-receptor interaction; map04270 Vascular smooth muscle contraction; map04923 Regulation of lipolysis in adipocytes; map04924 Renin secretion; map…	6.29715e+07	4.10207e+07	4.40767e+07	4.02833e+07	2.04711e+07	1.96654e+07	2.97644e+07	2.75469e+07	2.3253e+07	2.41784e+07	2.38499e+07	3.28674e+07	3.05911e+07	3.01021e+07	3.07393e+07	3.1636e+07	3.26651e+07	2.728e+07	2.56839e+07	2.78416e+07	4.82172e+07	3.46212e+07	3.53027e+07	4.19298e+07	6.27955e+07	6.5311e+07	5.06384e+07	5.97048e+07	5.90401e+07	3.2536e+07	2.77584e+07
B100194	NEG	3.165	188.035	C10 H7 N O3	Kynurenic acid	-0.330778	95.8201	level1	BMDB	C01717	HMDB0000715	Organoheterocyclic compounds	Quinoline carboxylic acids	Quinolines and derivatives	Quinoline carboxylic acids	Amino acid metabolism	Tryptophan metabolism	map00380 Tryptophan metabolism; map01100 Metabolic pathways	2.31191e+06	2.60459e+06	1.75501e+06	1.62443e+06	1.96073e+06	1.31828e+06	1.31068e+06	1.67787e+06	1.58305e+06	1.51089e+06	1.40357e+06	1.2402e+06	843814	1.10118e+06	696274	1.13666e+06	466609	1.90191e+06	1.40798e+06	1.49948e+06	1.02487e+06	1.59619e+06	2.47227e+06	663888	2.05723e+06	1.97561e+06	1.9181e+06	1.83284e+06	1.2686e+06	2.33606e+06	1.13866e+06
B100195	NEG	1.811	173.082	C8 H14 O4	Suberic acid	-0.500523	94.2035	level1	BMDB	C08278	HMDB0000893	Lipids and lipid-like molecules	Fatty acids and conjugates	Fatty Acyls	Fatty acyls[FA]				7.07132e+06	8.98589e+06	7.86495e+06	9.42236e+06	4.99647e+06	4.19125e+06	4.84772e+06	6.38559e+06	6.48348e+06	6.11026e+06	5.73328e+06	5.39421e+06	6.40763e+06	5.08331e+06	4.98586e+06	1.13752e+07	4.72698e+06	7.43163e+06	8.63048e+06	7.75285e+06	1.37522e+06	2.60631e+06	3.54842e+06	1.86554e+06	2.32436e+06	1.99466e+06	1.37669e+06	1.57361e+06	1.41063e+06	2.17353e+06	3.55038e+06
B100203	NEG	9.766	227.201	C14 H28 O2	Myristic acid	-1.01649	91.5881	level1	BMDB	C06424	HMDB0000806	Lipids and lipid-like molecules	Fatty acids and conjugates	Fatty Acyls	Fatty acyls[FA]	Lipid metabolism	Fatty acid biosynthesis	map00061 Fatty acid biosynthesis; map01100 Metabolic pathways	3.06971e+06	3.31613e+06	3.20329e+06	4.1845e+06	3.86659e+06	2.44615e+06	3.47488e+06	2.69837e+06	2.75993e+06	2.42089e+06	4.03915e+06	3.04667e+06	4.68429e+06	3.08048e+06	3.95123e+06	2.87208e+06	3.41355e+06	3.52373e+06	2.42902e+06	3.78609e+06	4.80717e+06	4.02322e+06	3.05715e+06	3.7406e+06	2.48881e+06	3.48257e+06	6.95964e+06	4.20122e+06	2.04544e+07	1.56158e+07	6.20931e+06
B100204	POS	0.739	130.086	C6 H11 N O2	Pipecolic acid	1.06366	93.3177	level1	BMDB	C00408	HMDB0000070	Organic acids and derivatives	Amino acids, peptides, and analogues	Carboxylic acids and derivatives	Amino acids, peptides, and analogues	Amino acid metabolism	Lysine degradation	map00310 Lysine degradation; map00960 Tropane, piperidine and pyridine alkaloid biosynthesis; map01060 Biosynthesis of plant secondary metabolites; map01064 Biosynthesis of alkaloids derived from ornithine, lysine and nicotinic acid; map01100 Metabolic pathways; map01110 Biosynthesis of secondary metabolites; map01120 Microbial metabolism in diverse environments	3.30909e+07	3.15843e+07	5.01655e+07	3.27381e+07	4.23762e+07	2.57413e+07	2.21669e+07	2.36661e+07	2.92087e+07	2.88377e+07	3.60229e+07	2.9144e+07	2.66227e+07	3.11474e+07	3.37515e+07	2.39417e+07	2.55253e+07	3.53977e+07	2.28504e+07	2.53138e+07	5.77249e+07	6.5899e+07	7.11735e+07	6.51684e+07	7.60783e+07	8.17175e+07	7.27978e+07	6.40655e+07	1.11776e+08	9.03372e+07	7.54517e+07
B100211	POS	0.746	130.05	C5 H7 N O3	Pyroglutamic acid	0.95468	93.8002	level1	BMDB	C01879	HMDB0000267	Organic acids and derivatives	Amino acids, peptides, and analogues	Carboxylic acids and derivatives	Amino acids, peptides, and analogues	Metabolism of other amino acids	Glutathione metabolism	map00480 Glutathione metabolism; map01100 Metabolic pathways	4.75841e+07	6.02778e+08	2.81745e+08	1.33872e+08	1.72756e+08	3.7965e+07	8.79317e+07	6.10966e+08	4.85945e+07	1.59048e+08	1.13838e+08	1.41049e+08	1.74457e+08	1.50337e+08	1.72611e+08	5.90487e+08	5.61957e+08	1.41907e+08	1.87284e+07	2.86989e+08	3.59912e+08	4.0621e+08	3.59309e+08	3.54522e+08	6.82126e+07	7.53344e+08	1.56959e+08	2.25301e+08	4.13617e+08	2.33046e+08	1.71348e+08
B100212	NEG	2.972	182.046	C8 H9 N O4	4-Pyridoxic acid	0.0864308	93.7824	level1	BMDB	C00847	HMDB0000017	Organoheterocyclic compounds	Pyridinecarboxylic acids and derivatives	Pyridines and derivatives	Pyridine and derivatives	Metabolism of cofactors and vitamins	Vitamin B6 metabolism	map00750 Vitamin B6 metabolism; map01100 Metabolic pathways; map01120 Microbial metabolism in diverse environments	3.2352e+07	1.24641e+07	1.89623e+07	1.17842e+07	9.00767e+06	1.33992e+07	3.72932e+07	1.44753e+07	1.67928e+07	3.17743e+07	2.14874e+07	1.23528e+07	8.30149e+06	7.73918e+06	4.85391e+06	5.22958e+07	1.99299e+07	2.68358e+07	4.92843e+07	2.16073e+07	4.07655e+07	5.1732e+07	6.82376e+07	5.56586e+07	5.20799e+07	5.27921e+07	3.23912e+07	4.16177e+07	2.09133e+07	2.92532e+07	5.95557e+07
B100215	POS	1.322	136.076	C8 H11 N O2	p-Octopamine	-117654	89.8971	level1	BMDB	C04227	HMDB0004825	Benzenoids	1-hydroxy-2-unsubstituted benzenoids	Phenols	Phenols and derivatives			map04080 Neuroactive ligand-receptor interaction	1.98405e+07	7.59286e+06	7.2786e+06	7.98145e+06	5.88827e+06	1.17783e+07	7.63681e+06	5.44754e+06	5.36831e+06	5.56285e+06	4.64425e+06	6.63129e+06	4.45313e+06	7.55681e+06	6.55063e+06	6.67304e+06	1.16261e+07	5.99805e+06	9.11126e+06	3.60847e+06	7.49858e+07	4.24406e+07	7.62042e+07	4.27724e+07	9.9609e+07	9.77057e+07	4.80976e+07	1.07477e+08	3.22317e+07	1.70994e+07	1.723e+07
B100216	POS	0.926	189.124	C8 H16 N2 O3	N-alpha-Acetyl-L-lysine	1.33264	80.4117	level1	BMDB	C12989	HMDB0000446	Organic acids and derivatives	Amino acids, peptides, and analogues	Carboxylic acids and derivatives	Amino acids, peptides, and analogues				7.10318e+06	8.1e+06	1.03338e+07	1.0125e+07	8.44686e+06	5.45728e+06	1.006e+07	6.72371e+06	5.3588e+06	7.18336e+06	7.18347e+06	5.09608e+06	7.17726e+06	5.09642e+06	7.45989e+06	7.03364e+06	8.31353e+06	4.2236e+06	2.0706e+06	3.02906e+06	1.53094e+07	9.92343e+06	2.44178e+07	1.5593e+07	1.82358e+07	2.2018e+07	2.30727e+07	2.45815e+07	1.46674e+07	1.63231e+07	1.46844e+07
B100217	POS	0.805	130.05	C5 H9 N O4	O-Acetylserine	-122476	82.7227	level1	BMDB	C00979	HMDB0003011	Organic acids and derivatives	Amino acids, peptides, and analogues	Carboxylic acids and derivatives	Amino acids, peptides, and analogues	Amino acid metabolism	Cysteine and methionine metabolism	map00270 Cysteine and methionine metabolism; map00908 Zeatin biosynthesis; map00920 Sulfur metabolism; map00998 Biosynthesis of various antibiotics; map01100 Metabolic pathways; map01110 Biosynthesis of secondary metabolites; map01120 Microbial metabolism in diverse environments; map01200 Carbon metabolism; map01230 Biosynthesis of amino acids; map04122 Sulfur relay system	1.93926e+07	3.15879e+07	2.72868e+07	1.36167e+07	2.08959e+07	1.41978e+07	3.90075e+07	6.88475e+07	1.45867e+07	4.62155e+07	1.18991e+07	4.44393e+06	4.45156e+07	2.15429e+07	4.00139e+07	7.0542e+07	3.70135e+07	3.37878e+07	1.33152e+07	5.2578e+07	8.23298e+07	5.67457e+07	1.90319e+08	5.8972e+07	4.69241e+07	9.81472e+07	4.01572e+07	4.25257e+07	6.30102e+07	4.93521e+07	3.68948e+07
B100224	POS	0.566	245.234	C12 H28 N4 O	N1-Acetylspermine	0.285667	98.8072	level1	BMDB	C02567	HMDB0001186	Organic acids and derivatives	Carboxylic acid derivatives	Carboxylic acids and derivatives	Organic acids				1.99338e+07	1.91141e+07	2.42871e+07	3.2706e+06	1.19581e+07	1.73712e+07	2.14844e+07	2.06563e+07	2.54906e+07	8.44917e+06	1.41073e+07	2.33633e+07	2.16419e+07	1.74499e+07	3.34648e+07	2.58935e+07	1.56965e+07	2.97575e+07	3.43853e+07	2.20874e+07	2.50977e+07	4.10633e+07	6.90603e+06	7.63176e+06	1.1461e+07	3.47638e+07	5.36461e+07	4.2712e+07	3.71682e+06	1.43006e+06	1.94764e+07
B100227	NEG	0.722	103.04	C4 H8 O3	3-Hydroxybutyric acid	0.0845082	99.1964	level1	BMDB	C01089	HMDB0000011	Organic acids and derivatives	Beta hydroxy acids and derivatives	Hydroxy acids and derivatives	Organic acids	Carbohydrate metabolism	Butanoate metabolism	map00650 Butanoate metabolism; map01100 Metabolic pathways; map04024 cAMP signaling pathway	1.15253e+07	1.52324e+07	5.69284e+06	2.10624e+06	1.24668e+07	8.96735e+06	2.06301e+07	1.17528e+07	1.4413e+07	2.432e+07	1.37372e+07	1.81021e+07	1.45233e+07	1.36469e+07	5.07788e+06	4.45593e+06	5.40823e+06	4.22237e+06	3.39193e+06	3.1896e+06	4.65526e+06	4.33806e+06	5.97274e+06	4.38724e+06	5.69703e+06	9.15566e+06	1.27999e+07	1.03328e+07	1.39005e+07	1.61016e+07	4.4343e+06
B100232	POS	3.401	161.108	C10 H12 N2	Tryptamine	2.00422	88.5796	level1	BMDB	C00398	HMDB0000303	Organoheterocyclic compounds	Tryptamines and derivatives	Indoles and derivatives	Amines and derivatives	Amino acid metabolism	Tryptophan metabolism	map00380 Tryptophan metabolism; map00901 Indole alkaloid biosynthesis; map01060 Biosynthesis of plant secondary metabolites; map01063 Biosynthesis of alkaloids derived from shikimate pathway; map01100 Metabolic pathways; map01110 Biosynthesis of secondary metabolites; map04080 Neuroactive ligand-receptor interaction	1.85949e+07	1.37715e+07	4.50076e+06	8.66416e+06	8.19829e+06	2.55452e+07	1.03191e+07	7.37374e+06	8.00109e+06	6.14398e+06	1.20337e+07	1.01804e+07	9.23926e+06	1.23355e+07	1.86615e+07	8.16093e+06	1.14606e+07	5.83433e+06	8.6489e+06	5.12621e+06	134601	262479	278359	395482	88318	283617	211071	206291	78723.1	603983	607196
B100234	NEG	0.643	131.035	C5 H8 O4	Glutaric acid	-0.527311	91.9603	level1	BMDB	C00489	HMDB0000661	Organic acids and derivatives	Dicarboxylic acids and derivatives	Carboxylic acids and derivatives	Organic acids	Lipid metabolism	Fatty acid degradation	map00071 Fatty acid degradation; map00310 Lysine degradation; map01100 Metabolic pathways; map01120 Microbial metabolism in diverse environments	5.87921e+06	2.9887e+06	861293	1.10258e+06	1.81773e+06	8.91206e+06	1.28943e+07	6.66737e+06	1.07999e+07	1.18636e+07	3.43234e+06	7.40134e+06	5.77322e+06	6.58257e+06	3.61657e+06	1.62464e+06	8.4506e+06	1.70635e+06	4.23188e+06	739507	5.9266e+06	5.78949e+06	1.94634e+07	1.36716e+07	2.36813e+07	4.8064e+06	2.80652e+06	1.38924e+07	5.31156e+06	3.99759e+06	3.5396e+07
B100235	POS	4.8	174.113	C8 H15 N O3	N-Acetylleucine	1.79675	91.6968	level1	BMDB	C02710	HMDB0011756	Organic acids and derivatives	Amino acids, peptides, and analogues	Carboxylic acids and derivatives	Amino acids, peptides, and analogues				2.29817e+07	2.36506e+07	1.25728e+07	1.02422e+07	1.14109e+07	1.59033e+07	1.8894e+07	2.17024e+07	2.48037e+07	3.11789e+07	1.59192e+07	1.52934e+07	1.01512e+07	2.06873e+07	1.22873e+07	2.29499e+07	9.31015e+06	1.74036e+07	1.51998e+07	1.55312e+07	2.5642e+07	5.6993e+07	2.78102e+07	1.45849e+07	4.59049e+07	5.61699e+07	3.58713e+07	3.2766e+07	1.73828e+07	1.54323e+07	1.5952e+07
B100241	NEG	4.481	188.072	C11 H11 N O2	Indole-3-methyl acetate	-0.327299	96.3243	level1	BMDB		HMDB0029738	Organoheterocyclic compounds	Indolyl carboxylic acids and derivatives	Indoles and derivatives	Indole and derivatives				749629	997219	884119	675106	547432	731455	868768	775403	708048	1.19928e+06	728130	966801	862217	781886	522577	698804	637455	902787	1.1229e+06	658893	436811	490652	824585	399290	828097	819163	632836	665162	1.5733e+06	1.02998e+06	806130
B100244	POS	8.519	302.305	C18 H39 N O2	Sphinganine	-0.209084	97.2995	level1	BMDB	C00836	HMDB0000269	Organic nitrogen compounds	Amines	Organonitrogen compounds	Amines	Lipid metabolism	Sphingolipid metabolism	map00600 Sphingolipid metabolism; map01100 Metabolic pathways; map04071 Sphingolipid signaling pathway	1.04973e+06	960544	509125	1.72005e+06	1.18352e+06	807591	598166	808818	697494	754159	2.61546e+06	623489	982016	594609	1.1724e+06	1.00545e+06	834629	808483	1.02868e+06	2.32108e+06	1.41374e+06	2.28416e+06	1.87231e+06	3.18143e+06	501116	1.10415e+06	1.97445e+06	559355	1.00618e+07	1.03127e+07	1.59573e+06
B100249	POS	0.731	139.05	C6 H6 N2 O2	Urocanic acid	0.745078	94.9859	level1	BMDB	C00785	HMDB0000301	Organoheterocyclic compounds	Imidazoles	Azoles	Imidazoles	Amino acid metabolism	Histidine metabolism	map00340 Histidine metabolism; map01100 Metabolic pathways	8.16256e+07	8.99529e+07	8.19079e+07	1.35109e+08	7.28411e+07	1.60374e+08	2.22729e+08	1.68497e+08	1.21645e+08	1.40444e+08	6.77736e+07	4.23562e+07	5.20929e+07	9.32694e+07	1.01205e+08	1.92775e+08	1.20242e+08	1.7605e+08	1.37458e+08	1.41332e+08	3.07913e+08	3.7297e+08	3.63846e+08	2.64076e+08	3.79153e+08	2.99906e+08	1.41728e+08	2.63963e+08	1.02821e+08	5.86066e+07	1.61994e+08
B100260	POS	0.589	126.103	C6 H11 N3	3-Methylhistamine	0.687854	77.5607	level1	BMDB		HMDB0001861	Organic nitrogen compounds	Amines	Organonitrogen compounds	Amines				210149	279797	428165	275136	401369	141069	278459	571867	186641	204790	214762	168897	239845	159789	255736	229824	311432	235238	223881	213286	90894.2	194067	198543	200607	135311	274820	216032	134942	318890	253987	132792
B100265	POS	5.199	162.092	C10 H11 N O	Tryptophol	1.68105	90.0597	level1	BMDB	C00955	HMDB0003447	Organoheterocyclic compounds	Indoles	Indoles and derivatives	Indoles	Amino acid metabolism	Tryptophan metabolism	map00380 Tryptophan metabolism	7.0279e+06	1.40264e+07	6.93511e+06	8.08271e+06	1.04962e+07	5.25262e+06	4.95076e+06	9.59376e+06	9.79795e+06	6.4356e+06	1.44099e+07	1.53358e+07	1.13864e+07	1.99988e+07	1.72907e+07	9.9392e+06	2.09484e+07	9.61252e+06	1.31557e+07	1.00079e+07	741103	559166	441483	659765	854000	806909	994602	856709	1.19373e+06	696285	1.11597e+06
B100266	NEG	0.973	137.024	C7 H6 O3	3-Hydroxybenzoic acid	-0.0191182	99.7586	level1	BMDB	C00587	HMDB0002466	Benzenoids	Benzoic acids and derivatives	Benzene and substituted derivatives	Benzene and derivatives	Xenobiotics biodegradation and metabolism	Benzoate degradation	map00362 Benzoate degradation; map00400 Phenylalanine, tyrosine and tryptophan biosynthesis; map00623 Toluene degradation; map00624 Polycyclic aromatic hydrocarbon degradation; map01120 Microbial metabolism in diverse environments; map01220 Degradation of aromatic compounds	1.13947e+07	1.83673e+07	1.32105e+07	1.21825e+07	4.71129e+06	9.29292e+06	4.45167e+06	1.79249e+07	1.48926e+07	7.95303e+06	3.76637e+06	5.50509e+06	5.6531e+06	7.67892e+06	4.87945e+06	7.91566e+06	9.60875e+06	5.83224e+06	5.66074e+06	2.63173e+06	8.15843e+06	7.77362e+06	2.09645e+07	7.85215e+06	1.02723e+07	5.73671e+06	4.12521e+06	6.7312e+06	9.51231e+06	1.08608e+07	3.63497e+06
B100267	POS	3.117	168.066	C8 H9 N O3	Pyridoxal	2.00712	75.238	level1	BMDB	C00250	HMDB0001545	Organoheterocyclic compounds	Pyridine carboxaldehydes	Pyridines and derivatives	Pyridine and derivatives	Metabolism of cofactors and vitamins	Vitamin B6 metabolism	map00750 Vitamin B6 metabolism; map01100 Metabolic pathways; map01120 Microbial metabolism in diverse environments; map01240 Biosynthesis of cofactors; map04977 Vitamin digestion and absorption	1.30805e+07	1.3866e+07	1.22184e+07	1.23243e+07	1.72883e+07	1.01715e+07	9.78791e+06	1.24066e+07	7.71659e+06	1.36133e+07	1.19628e+07	1.06862e+07	1.29093e+07	7.01224e+06	1.7024e+07	6.52268e+06	1.03523e+07	7.21e+06	7.64609e+06	9.19198e+06	2.84024e+06	4.55259e+06	8.89557e+06	3.68328e+06	5.82733e+06	1.03505e+07	7.37777e+06	4.32517e+06	7.4893e+06	1.07052e+07	1.15353e+07
B100268	NEG	3.005	137.024	C7 H6 O3	Salicylic acid	-0.379967	98.3537	level1	BMDB	C00805	HMDB0001895	Benzenoids	Benzoic acids and derivatives	Benzene and substituted derivatives	Benzene and derivatives	Xenobiotics biodegradation and metabolism	Dioxin degradation	map00621 Dioxin degradation; map00624 Polycyclic aromatic hydrocarbon degradation; map00626 Naphthalene degradation; map00996 Biosynthesis of various alkaloids; map01053 Biosynthesis of siderophore group nonribosomal peptides; map01061 Biosynthesis of phenylpropanoids; map01070 Biosynthesis of plant hormones; map01100 Metabolic pathways; map01110 Biosynthesis of secondary metabolites; map01120 Mi…	1.56937e+07	1.54127e+07	1.13204e+07	1.35591e+07	8.85387e+06	1.20407e+07	1.53276e+07	1.22644e+07	1.38861e+07	1.47525e+07	1.06274e+07	1.21987e+07	1.68635e+07	1.55384e+07	1.07686e+07	1.59118e+07	8.43609e+06	1.39876e+07	1.81821e+07	1.43909e+07	2.69462e+06	3.65602e+06	4.50459e+06	4.61175e+06	4.60166e+06	4.42292e+06	4.11203e+06	4.37681e+06	3.68198e+06	4.1114e+06	5.12693e+06
B100272	POS	2.709	107.049	C7 H8 O2	4-Methylcatechol	-145184	90.3959	level1	BMDB	C06730	HMDB0000873	Benzenoids	Benzenediols	Phenols	Phenols and derivatives	Xenobiotics biodegradation and metabolism	Xylene degradation	map00622 Xylene degradation; map00623 Toluene degradation; map00626 Naphthalene degradation; map01100 Metabolic pathways; map01120 Microbial metabolism in diverse environments; map01220 Degradation of aromatic compounds	6.5632e+06	4.44141e+06	3.45208e+06	4.10725e+06	3.9014e+06	4.97758e+06	4.79198e+06	3.19345e+06	3.71839e+06	3.77741e+06	3.21455e+06	3.71241e+06	2.76487e+06	3.96509e+06	4.32614e+06	4.01538e+06	3.90524e+06	3.79951e+06	3.36938e+06	3.05301e+06	1.40274e+07	1.40169e+07	1.29019e+07	9.80683e+06	1.88545e+07	1.83458e+07	1.11614e+07	1.55504e+07	8.61852e+06	5.38371e+06	5.03814e+06
B100275	NEG	9.791	277.217	C18 H30 O2	gamma-Linolenic acid	-1.63263	93.8922	level1	BMDB	C06426	HMDB0003073	Lipids and lipid-like molecules	Lineolic acids and derivatives	Fatty Acyls	Fatty acyls[FA]	Lipid metabolism	Linoleic acid metabolism	map00591 Linoleic acid metabolism; map01040 Biosynthesis of unsaturated fatty acids; map01100 Metabolic pathways	6.53506e+06	5.37542e+06	6.86045e+06	4.8285e+06	6.49645e+06	3.54133e+06	7.23232e+06	3.64857e+06	4.91591e+06	6.24533e+06	5.07266e+06	7.16823e+06	3.03067e+06	8.98152e+06	5.49361e+06	6.07153e+06	8.16367e+06	5.59986e+06	3.89326e+06	4.87786e+06	6.29149e+06	3.56406e+06	5.41483e+06	3.14012e+06	8.18178e+06	2.96983e+06	7.31013e+06	6.78657e+06	1.93471e+07	1.24449e+07	8.5758e+06
B100279	POS	0.716	116.071	C5 H9 N O2	L-Proline	0.202758	93.5195	level1	BMDB	C00148	HMDB0000162	Organic acids and derivatives	Amino acids, peptides, and analogues	Carboxylic acids and derivatives	Amino acids	Amino acid metabolism	Arginine and proline metabolism	map00330 Arginine and proline metabolism; map00332 Carbapenem biosynthesis; map00333 Prodigiosin biosynthesis; map00401 Novobiocin biosynthesis; map00404 Staurosporine biosynthesis; map00470 D-Amino acid metabolism; map00970 Aminoacyl-tRNA biosynthesis; map01100 Metabolic pathways; map01110 Biosynthesis of secondary metabolites; map01230 Biosynthesis of amino acids; map02010 ABC transporters; map…	1.61938e+09	9.54472e+08	8.35702e+08	5.98591e+08	8.09852e+08	1.34344e+09	1.35e+09	1.0721e+09	1.65178e+09	1.20589e+09	7.1417e+08	1.19704e+09	5.15477e+08	1.07268e+09	7.89929e+08	8.52725e+08	5.63599e+08	8.23109e+08	8.36442e+08	7.10951e+08	1.71469e+09	1.07161e+09	1.01497e+09	8.74954e+08	1.82531e+09	1.4502e+09	1.46302e+09	1.92049e+09	1.04139e+09	1.07196e+09	6.56133e+08
B100280	POS	2.605	127.05	C5 H6 N2 O2	Thymine	2.14811	96.4326	level1	BMDB	C00178	HMDB0000262	Organoheterocyclic compounds	Pyrimidines and pyrimidine derivatives	Diazines	Pyrimidines and pyrimidine derivatives	Nucleotide metabolism	Pyrimidine metabolism	map00240 Pyrimidine metabolism; map01100 Metabolic pathways; map01232 Nucleotide metabolism	1.77747e+08	1.64456e+08	1.77249e+08	1.78134e+08	1.67736e+08	1.07947e+08	1.23844e+08	1.27501e+08	1.01998e+08	1.39773e+08	1.69877e+08	1.3124e+08	1.66898e+08	1.44359e+08	1.51094e+08	1.40765e+08	1.7346e+08	1.33436e+08	9.64206e+07	1.446e+08	1.38964e+08	6.14817e+07	1.11734e+08	1.25125e+08	1.45057e+08	1.25828e+08	1.15827e+08	2.07982e+08	1.03109e+08	1.52309e+08	1.05698e+08
B100282	POS	0.647	175.119	C6 H14 N4 O2	L-Arginine	1.13091	95.0123	level1	BMDB	C00062	HMDB0000517	Organic acids and derivatives	Amino acids, peptides, and analogues	Carboxylic acids and derivatives	Amino acids	Amino acid metabolism	Arginine biosynthesis	map00220 Arginine biosynthesis; map00261 Monobactam biosynthesis; map00330 Arginine and proline metabolism; map00331 Clavulanic acid biosynthesis; map00470 D-Amino acid metabolism; map00970 Aminoacyl-tRNA biosynthesis; map00998 Biosynthesis of various antibiotics; map01060 Biosynthesis of plant secondary metabolites; map01064 Biosynthesis of alkaloids derived from ornithine, lysine and nicotinic …	5.00273e+07	2.31179e+07	1.21594e+07	2.25616e+07	5.18759e+06	1.33356e+07	2.53663e+07	1.44358e+07	2.35993e+07	1.20005e+07	9.74257e+06	9.76728e+06	7.71155e+06	1.27519e+07	9.09539e+06	9.7482e+06	5.99808e+06	2.07105e+07	1.16608e+07	1.01298e+07	2.46986e+07	2.22752e+07	6.86867e+07	3.57353e+07	6.33054e+07	4.71541e+07	2.80044e+07	4.5176e+07	1.86189e+07	1.24513e+07	5.3459e+06
B100285	POS	4.446	102.055	C4 H7 N O2	1-Aminocyclopropanecarboxylic acid	1.60892	75.9262	level1	BMDB	C01234	HMDB0036458	Organic acids and derivatives	Amino acids, peptides, and analogues	Carboxylic acids and derivatives	Amino acids, peptides, and analogues	Amino acid metabolism	Cysteine and methionine metabolism	map00270 Cysteine and methionine metabolism; map01060 Biosynthesis of plant secondary metabolites; map01070 Biosynthesis of plant hormones; map01100 Metabolic pathways; map01110 Biosynthesis of secondary metabolites	3.47784e+06	2.65838e+06	3.20154e+06	5.99857e+06	4.39572e+06	2.3655e+06	3.30656e+06	5.90088e+06	3.0809e+06	2.28948e+06	4.23386e+06	2.76611e+06	3.66498e+06	2.86797e+06	6.80975e+06	3.3534e+06	6.63132e+06	5.97001e+06	3.07204e+06	4.1136e+06	3.22174e+06	6.6909e+06	2.89523e+06	4.92114e+06	3.30957e+07	6.91901e+06	7.24282e+06	2.76281e+06	9.98787e+06	1.07212e+07	5.06044e+06
B100290	NEG	0.682	131.083	C5 H12 N2 O2	Ornithine	-0.522799	85.7226	level1	BMDB	C00077	HMDB0000214	Organic acids and derivatives	Amino acids, peptides, and analogues	Carboxylic acids and derivatives	Amino acids, peptides, and analogues	Amino acid metabolism	Arginine biosynthesis	map00220 Arginine biosynthesis; map00330 Arginine and proline metabolism; map00470 D-Amino acid metabolism; map00480 Glutathione metabolism; map00997 Biosynthesis of various other secondary metabolites; map00998 Biosynthesis of various antibiotics; map01060 Biosynthesis of plant secondary metabolites; map01064 Biosynthesis of alkaloids derived from ornithine, lysine and nicotinic acid; map01100 M…	1.59545e+07	1.41113e+07	1.12195e+07	1.60226e+07	1.61243e+07	1.49246e+07	1.1738e+07	8.31309e+06	1.05226e+07	9.11155e+06	1.05437e+07	1.00856e+07	9.39402e+06	1.22167e+07	1.45674e+07	8.45535e+06	1.12289e+07	5.29167e+06	7.6916e+06	9.02362e+06	4.16071e+07	3.74192e+07	3.029e+07	2.95263e+07	4.22112e+07	5.28114e+07	3.38037e+07	4.70626e+07	2.59002e+07	1.93263e+07	1.45273e+07
B100291	NEG	2.49	190.054	C7 H13 N O3 S	N-Acetyl-L-methionine	-0.389866	97.6243	level1	BMDB	C02712	HMDB0011745	Organic acids and derivatives	Amino acids, peptides, and analogues	Carboxylic acids and derivatives	Amino acids, peptides, and analogues				2.02209e+07	1.86291e+07	9.90136e+06	1.10006e+07	8.20782e+06	1.33899e+07	1.85261e+07	1.74192e+07	2.39141e+07	2.29147e+07	1.11517e+07	1.21463e+07	5.70287e+06	1.48428e+07	1.07997e+07	2.04961e+07	8.49413e+06	1.58473e+07	1.70452e+07	1.40792e+07	3.57239e+07	4.9362e+07	5.07323e+07	1.89961e+07	5.32084e+07	7.59937e+07	4.35311e+07	5.3731e+07	1.8685e+07	9.18508e+06	1.38745e+07
B100296	NEG	0.7	154.062	C6 H9 N3 O2	L-Histidine	-0.365235	94.0312	level1	BMDB	C00135	HMDB0000177	Organic acids and derivatives	Amino acids, peptides, and analogues	Carboxylic acids and derivatives	Amino acids	Amino acid metabolism	Histidine metabolism	map00340 Histidine metabolism; map00404 Staurosporine biosynthesis; map00410 beta-Alanine metabolism; map00470 D-Amino acid metabolism; map00970 Aminoacyl-tRNA biosynthesis; map01060 Biosynthesis of plant secondary metabolites; map01065 Biosynthesis of alkaloids derived from histidine and purine; map01100 Metabolic pathways; map01110 Biosynthesis of secondary metabolites; map01230 Biosynthesis of…	1.16459e+06	1.11424e+06	807248	1.28896e+06	865766	1.53135e+06	1.46367e+06	1.28403e+06	1.49395e+06	1.39983e+06	924070	785463	751027	1.03489e+06	991965	806526	1.1681e+06	1.04695e+06	1.11128e+06	1.07336e+06	4.90229e+06	3.95004e+06	4.0437e+06	3.91654e+06	7.50361e+06	6.09135e+06	2.41858e+06	7.18644e+06	1.38082e+06	618580	2.02352e+06
B100298	POS	0.54	146.165	C7 H19 N3	Spermidine	1.66984	78.2303	level1	BMDB	C00315	HMDB0001257	Organic nitrogen compounds	Amines	Organonitrogen compounds	Amines	Amino acid metabolism	Arginine and proline metabolism	map00330 Arginine and proline metabolism; map00410 beta-Alanine metabolism; map00480 Glutathione metabolism; map00940 Phenylpropanoid biosynthesis; map01053 Biosynthesis of siderophore group nonribosomal peptides; map01100 Metabolic pathways; map02010 ABC transporters; map04976 Bile secretion	6.30414e+08	5.97609e+08	4.31982e+08	6.6205e+08	2.46002e+08	2.8084e+08	4.85176e+08	3.05506e+08	3.5802e+08	4.88214e+08	3.38549e+08	3.70893e+08	4.35522e+08	3.73872e+08	3.33751e+08	5.07577e+08	1.89678e+08	5.3453e+08	6.10474e+08	5.40024e+08	1.93492e+08	4.68025e+08	7.44524e+08	4.48572e+08	5.46146e+08	4.02753e+08	2.77121e+08	3.6898e+08	2.53509e+07	1.12285e+07	1.2896e+08
B100303	POS	5.514	148.076	C9 H9 N O	3-Methyloxindole	1.49273	91.4433	level1	BMDB	C02366	HMDB0304943	Organoheterocyclic compounds	Indolines	Indoles and derivatives	Indole and derivatives				1.79716e+06	1.68576e+06	2.62202e+06	1.93402e+06	2.72454e+06	4.76916e+06	1.66039e+06	1.30317e+06	1.4694e+06	7.59975e+06	1.85275e+06	1.86977e+06	3.28749e+06	3.88002e+06	6.12492e+06	3.31709e+06	5.99169e+06	3.49808e+06	5.53068e+06	3.05448e+06	1.34713e+06	2.44726e+06	1.21802e+06	5.30062e+06	2.11062e+06	1.15675e+07	1.23416e+07	8.80793e+06	3.87019e+06	2.08571e+06	6.44685e+06
B100307	POS	4.214	245.096	C10 H16 N2 O3 S	Biotin	0.49863	94.9077	level1	BMDB	C00120	HMDB0000030	Organoheterocyclic compounds		Biotin and derivatives	Biotin and derivatives	Metabolism of cofactors and vitamins	Biotin metabolism	map00780 Biotin metabolism; map01100 Metabolic pathways; map01240 Biosynthesis of cofactors; map02010 ABC transporters; map04977 Vitamin digestion and absorption	9.91845e+06	1.17181e+07	1.23041e+07	1.75021e+07	1.38851e+07	1.35182e+07	1.19076e+07	1.39047e+07	1.06446e+07	1.27417e+07	1.08398e+07	1.68345e+07	1.3359e+07	1.19281e+07	1.39951e+07	1.15621e+07	1.43605e+07	1.45702e+07	1.08364e+07	1.18866e+07	3.34313e+06	1.85746e+06	2.49263e+06	1.54095e+06	2.02227e+06	3.45382e+06	2.58106e+06	3.26154e+06	986366	653361	6.48572e+06
B100309	POS	3.507	192.066	C10 H9 N O3	5-Hydroxyindoleacetic acid	1.77569	91.8876	level1	BMDB	C05635	HMDB0000763	Organoheterocyclic compounds	Indolyl carboxylic acids and derivatives	Indoles and derivatives	Indole and derivatives	Amino acid metabolism	Tryptophan metabolism	map00380 Tryptophan metabolism; map01100 Metabolic pathways; map04726 Serotonergic synapse	293232	317713	338313	88823.3	41653.2	320927	314774	275851	332901	338903	443419	300676	300890	36971.9	24512.9	213912	88775.2	371304	100273	223411	305533	182899	190101	261811	108345	117233	163573	131926	18520.4	253962	2.79875e+06
B100311	POS	8.382	426.322	C24 H40 O5	Cholic acid	41702.9	94.9827	level1	BMDB	C00695	HMDB0000619	Lipids and lipid-like molecules	Bile acids, alcohols and derivatives	Steroids and steroid derivatives	Bile acids, alcohols and derivatives	Lipid metabolism	Primary bile acid biosynthesis	map00120 Primary bile acid biosynthesis; map00121 Secondary bile acid biosynthesis; map01100 Metabolic pathways; map04976 Bile secretion	80769.8	82571.8	67229.7	88472.1	108538	162238	103862	156982	132600	68323.3	222398	130685	100687	205268	631764	146826	5.74219e+06	93038.4	105504	124760	540988	1.14843e+06	2.95366e+06	619049	1.12111e+06	833431	696179	8.88853e+06	1.04924e+06	797828	1.29888e+06
B100317	POS	2.551	285.083	C10 H12 N4 O6	Xanthosine	0.223441	78.2784	level1	BMDB	C01762	HMDB0000299	Nucleosides, nucleotides, and analogues		Purine nucleosides	Purines and derivatives	Nucleotide metabolism	Purine metabolism	map00230 Purine metabolism; map00232 Caffeine metabolism; map01065 Biosynthesis of alkaloids derived from histidine and purine; map01100 Metabolic pathways; map01110 Biosynthesis of secondary metabolites; map01232 Nucleotide metabolism; map02010 ABC transporters	3.46477e+06	3.99212e+06	2.50969e+06	1.40192e+06	4.36496e+06	2.4484e+06	1.97802e+06	1.94859e+06	2.12393e+06	3.02024e+06	4.69709e+06	5.00951e+06	2.54892e+06	4.87262e+06	3.367e+06	2.84886e+06	5.82635e+06	1.56032e+06	3.10606e+06	1.54324e+06	2.26739e+06	1.61935e+06	1.43318e+06	3.16194e+06	2.07757e+06	2.04753e+06	577758	3.28148e+06	5.54768e+06	6.31159e+06	347723
B100318	POS	0.59	112.087	C5 H9 N3	Histamine	0.936672	92.1985	level1	BMDB	C00388	HMDB0000870	Organic nitrogen compounds	Amines	Organonitrogen compounds	Amines	Amino acid metabolism	Histidine metabolism	map00340 Histidine metabolism; map01065 Biosynthesis of alkaloids derived from histidine and purine; map01100 Metabolic pathways; map01110 Biosynthesis of secondary metabolites; map04080 Neuroactive ligand-receptor interaction; map04664 Fc epsilon RI signaling pathway; map04721 Synaptic vesicle cycle; map04750 Inflammatory mediator regulation of TRP channels; map04971 Gastric acid secretion; map0…	4.51537e+06	2.20195e+07	1.49251e+07	2.79099e+06	3.04799e+06	8.90597e+06	1.01387e+07	1.32416e+07	6.15669e+06	3.37475e+06	1.11263e+06	3.92004e+06	2.9411e+06	1.90385e+07	1.64188e+06	4.55781e+06	2.5263e+07	6.30207e+06	3.53564e+07	1.87251e+06	2.22909e+06	1.6581e+06	2.02969e+06	959425	886248	3.2286e+06	1.16783e+07	7.61424e+06	1.87236e+07	1.01224e+06	1.05115e+07
B100328	POS	6.352	149.06	C9 H8 O2	trans-Cinnamic acid	1.82074	61.2637	level1	BMDB	C10438	HMDB0000930	Phenylpropanoids and polyketides	Cinnamic acids	Cinnamic acids and derivatives	Polyketides[PK]				406317	354193	399790	344405	256698	364283	323897	288003	1.18701e+06	363229	557966	346730	301562	330411	374290	383537	289016	382351	416984	343129	273018	455197	3.75905e+06	604016	895207	734368	484260	406820	341949	439967	256582
B100330	POS	9.353	303.253	C17 H34 O4	Glycerol 1-myristate	-0.160009	98.0279	level1	BMDB		HMDB0304951	Lipids and lipid-like molecules	Monoradylglycerols	Glycerolipids	Glycerolipids[GL]				4.79379e+07	4.26505e+07	3.33264e+07	2.57866e+07	3.74071e+07	4.7731e+07	4.01649e+07	3.22421e+07	4.4344e+07	3.83389e+07	3.60803e+07	4.35548e+07	4.56341e+07	5.09592e+07	3.72338e+07	3.26643e+07	3.30078e+07	4.65547e+07	1.95103e+07	2.48092e+07	3.56082e+07	5.67432e+07	1.94524e+07	1.83631e+07	2.96031e+07	1.82201e+07	4.79014e+07	3.97836e+07	1.53801e+08	9.22926e+07	1.53039e+07
B100331	POS	9.984	283.263	C18 H34 O2	Oleic acid	0.220342	88.0795	level1	BMDB	C00712	HMDB0000207	Lipids and lipid-like molecules	Fatty acids and conjugates	Fatty Acyls	Fatty acyls[FA]	Lipid metabolism	Fatty acid biosynthesis	map00061 Fatty acid biosynthesis; map00073 Cutin, suberine and wax biosynthesis; map01040 Biosynthesis of unsaturated fatty acids; map01060 Biosynthesis of plant secondary metabolites; map04212 Longevity regulating pathway - worm	7.12308e+06	6.98866e+06	7.7704e+06	8.37657e+06	1.02214e+07	4.85816e+06	8.44304e+06	5.73333e+06	5.29678e+06	6.45276e+06	9.15187e+06	6.88857e+06	7.27952e+06	6.78487e+06	7.42443e+06	6.84584e+06	7.59015e+06	6.42859e+06	5.8849e+06	6.1633e+06	1.13703e+07	1.15452e+07	7.91443e+06	7.749e+06	6.91653e+06	7.18062e+06	2.10688e+07	8.21313e+06	3.59528e+07	4.81136e+07	8.23436e+06
B100337	POS	9.721	374.326	C21 H40 O4	MG(18:1(9Z)/0:0/0:0)	47787.6	91.482	level1	BMDB		HMDB0011567	Lipids and lipid-like molecules	Monoradylglycerols	Glycerolipids	Glycerolipids[GL]				4.99497e+06	3.88693e+06	7.68278e+06	5.46811e+06	2.25295e+06	5.31383e+06	3.21117e+06	3.28012e+06	3.67686e+06	6.60721e+06	2.03284e+06	4.24201e+06	2.30545e+06	3.77421e+06	2.4326e+06	5.08582e+06	6.12924e+06	4.13605e+06	7.11582e+06	2.24363e+06	7.63805e+06	6.31233e+06	5.69258e+06	3.37745e+06	7.49279e+06	5.32911e+06	1.0859e+07	1.60887e+07	1.19248e+07	1.10516e+07	947998
B100338	POS	0.605	147.113	C6 H14 N2 O2	L-Lysine	0.720601	91.0657	level1	BMDB	C00047	HMDB0000182	Organic acids and derivatives	Amino acids, peptides, and analogues	Carboxylic acids and derivatives	Amino acids	Amino acid metabolism	Lysine biosynthesis	map00300 Lysine biosynthesis; map00310 Lysine degradation; map00470 D-Amino acid metabolism; map00780 Biotin metabolism; map00960 Tropane, piperidine and pyridine alkaloid biosynthesis; map00970 Aminoacyl-tRNA biosynthesis; map00997 Biosynthesis of various other secondary metabolites; map01060 Biosynthesis of plant secondary metabolites; map01064 Biosynthesis of alkaloids derived from ornithine, …	5.81787e+06	7.94372e+06	8.01709e+06	1.08781e+07	1.43303e+07	4.95117e+06	5.19442e+06	3.95644e+06	3.88436e+06	3.10066e+06	3.29258e+06	3.05308e+06	3.62627e+06	5.12247e+06	6.28802e+06	2.60208e+06	2.98024e+06	5.6341e+06	2.05612e+06	2.86256e+06	8.73129e+07	2.53299e+07	7.02499e+07	7.31219e+07	9.74215e+07	1.01695e+08	4.77101e+07	4.08764e+07	1.00273e+07	5.9329e+06	4.23268e+06
B100341	POS	0.594	131.129	C5 H14 N4	Agmatine	0.198164	67.3805	level1	BMDB	C00179	HMDB0001432	Organic nitrogen compounds	Guanidines	Organonitrogen compounds	Guanidines	Amino acid metabolism	Arginine and proline metabolism	map00330 Arginine and proline metabolism; map00999 Biosynthesis of various plant secondary metabolites; map01100 Metabolic pathways; map01110 Biosynthesis of secondary metabolites	1.86196e+06	901048	370038	528474	617702	1.34396e+06	837044	568518	2.00551e+06	870618	1.07847e+06	601627	164697	603228	443989	599839	84297.6	459890	252879	591691	810149	444698	7.72396e+06	2.086e+06	2.78971e+06	2.06863e+06	2.5316e+06	2.81701e+06	351516	757838	519020
B100357	POS	3.845	174.055	C10 H7 N O2	Quinaldic acid	1.88033	87.4826	level1	BMDB	C06325	HMDB0000842	Organoheterocyclic compounds	Quinoline carboxylic acids	Quinolines and derivatives	Quinoline carboxylic acids				8.78098e+06	7.29997e+06	6.92762e+06	5.19207e+06	5.99568e+06	4.61742e+06	5.11536e+06	5.64435e+06	4.98549e+06	5.4877e+06	5.25708e+06	5.21459e+06	5.5937e+06	5.52722e+06	4.66817e+06	4.89419e+06	3.42011e+06	4.43874e+06	4.44412e+06	3.57153e+06	4.42778e+06	4.71271e+06	5.07711e+06	3.50768e+06	3.65401e+06	7.1454e+06	4.44138e+06	2.77786e+06	2.804e+06	4.12562e+06	6.73009e+06
B100359	NEG	4.022	121.029	C7 H6 O2	4-Hydroxybenzaldehyde	-0.925622	99.621	level1	BMDB	C00633	HMDB0011718	Organic oxygen compounds	Carbonyl compounds	Organooxygen compounds	Carbonyl compounds	Xenobiotics biodegradation and metabolism	Bisphenol degradation	map00363 Bisphenol degradation; map00623 Toluene degradation; map00627 Aminobenzoate degradation; map01061 Biosynthesis of phenylpropanoids; map01100 Metabolic pathways; map01120 Microbial metabolism in diverse environments	3.13908e+08	2.67164e+08	1.81178e+08	2.032e+08	1.46177e+08	2.5081e+08	2.75053e+08	1.77447e+08	2.47086e+08	1.89657e+08	3.09903e+08	1.54962e+08	9.9953e+07	1.89413e+08	2.43524e+08	2.55904e+08	5.18173e+07	2.01413e+08	1.77809e+08	2.39898e+08	1.44241e+08	5.10786e+08	2.08671e+08	1.25574e+08	2.28507e+08	2.23162e+08	2.10497e+08	2.7912e+08	2.6961e+08	5.27883e+08	8.90166e+07
B100363	POS	8.225	347.222	C21 H30 O4	Corticosterone	-0.176602	85.5012	level1	BMDB	C02140	HMDB0001547	Lipids and lipid-like molecules	Hydroxysteroids	Steroids and steroid derivatives	Steroids and derivatives	Lipid metabolism	Steroid hormone biosynthesis	map00140 Steroid hormone biosynthesis; map01100 Metabolic pathways; map04923 Regulation of lipolysis in adipocytes; map04925 Aldosterone synthesis and secretion; map05020 Prion disease	190361	185758	102787	146423	117414	479598	293274	264527	272530	382713	255982	125192	159353	233561	173254	480462	71636.1	178325	460161	577021	685035	604522	446633	904287	1.61375e+06	698918	639809	642044	180984	140804	625490
B100369	POS	1.025	176.056	C6 H9 N O5	N-Acetyl-L-aspartic acid	1.63707	91.2274	level1	BMDB	C01042	HMDB0000812	Organic acids and derivatives	Amino acids, peptides, and analogues	Carboxylic acids and derivatives	Amino acids, peptides, and analogues	Amino acid metabolism	Alanine, aspartate and glutamate metabolism	map00250 Alanine, aspartate and glutamate metabolism; map01100 Metabolic pathways	2.0861e+06	1.24553e+06	1.07326e+06	950980	930970	1.35611e+06	1.57139e+06	1.4379e+06	1.64859e+06	1.14904e+06	1.19248e+06	1.38687e+06	1.24215e+06	1.01648e+06	1.30461e+06	1.84033e+06	1.1852e+06	1.30114e+06	1.28387e+06	1.20013e+06	1.36588e+07	1.22631e+07	9.28867e+06	9.46018e+06	1.01491e+07	4.03562e+06	3.84702e+06	6.20087e+06	1.19475e+07	4.61232e+06	5.42296e+06
B100384	NEG	0.795	147.066	C6 H12 O4	Mevalonic acid	-0.0441046	69.7847	level1	BMDB	C00418	HMDB0000227	Lipids and lipid-like molecules	Fatty acids and conjugates	Fatty Acyls	Fatty acyls[FA]	Metabolism of terpenoids and polyketides	Terpenoid backbone biosynthesis	map00900 Terpenoid backbone biosynthesis; map01060 Biosynthesis of plant secondary metabolites; map01062 Biosynthesis of terpenoids and steroids; map01070 Biosynthesis of plant hormones; map01100 Metabolic pathways; map01110 Biosynthesis of secondary metabolites; map04216 Ferroptosis	2.48083e+06	2.86986e+06	446449	967990	2.13464e+06	798598	661736	2.76785e+06	1.806e+06	2.03465e+06	1.38341e+06	1.68675e+06	2.41139e+06	1.65122e+06	2.18428e+06	481261	722024	1.16342e+06	568047	274643	1.54275e+06	4.24967e+06	2.17985e+06	1.04993e+06	1.09863e+06	5.8051e+06	1.70871e+06	2.33004e+07	5.21622e+06	4.05102e+06	1.09758e+06
B100394	POS	3.033	158.082	C7 H11 N O3	N-Acetylproline	2.36263	86.5457	level1	BMDB	C09263	HMDB0094701	Organic acids and derivatives	Amino acids, peptides, and analogues	Carboxylic acids and derivatives	Amino acids, peptides, and analogues	Biosynthesis of other secondary metabolites	Biosynthesis of various secondary metabolites - part 1	map00999 Biosynthesis of various plant secondary metabolites; map01061 Biosynthesis of phenylpropanoids; map01110 Biosynthesis of secondary metabolites	1.54592e+07	1.31873e+07	1.30786e+07	1.09874e+07	1.23839e+07	1.39767e+07	1.38029e+07	1.20056e+07	1.15993e+07	1.20484e+07	1.1004e+07	1.28685e+07	1.11938e+07	1.19052e+07	9.95755e+06	1.60066e+07	1.41888e+07	1.75573e+07	1.90376e+07	1.33203e+07	6.76895e+06	5.07261e+06	6.04609e+06	9.06572e+06	4.44326e+06	7.6663e+06	5.96696e+06	1.83077e+07	6.57274e+06	7.12757e+06	5.93131e+06
B100396	POS	9.03	303.232	C20 H30 O2	Eicosapentaenoic acid	-0.11094	97.2758	level1	BMDB	C06428	HMDB0001999	Lipids and lipid-like molecules	Fatty acids and conjugates	Fatty Acyls	Fatty acyls[FA]	Lipid metabolism	Biosynthesis of unsaturated fatty acids	map01040 Biosynthesis of unsaturated fatty acids	6.9369e+06	4.92792e+06	6.86538e+06	1.64934e+06	6.02424e+06	2.19312e+06	2.85564e+06	2.74818e+06	2.28124e+06	8.00156e+06	4.81944e+06	2.65429e+06	1.96773e+06	7.01508e+06	5.34427e+06	2.60906e+06	928483	3.01505e+06	1.00917e+06	1.68767e+06	3.29535e+06	1.08922e+07	2.17343e+06	2.3023e+06	1.18476e+07	1.23125e+07	2.22405e+07	2.5152e+07	2.15751e+07	3.71308e+07	1.1141e+06
B100397	POS	6.356	185.118	C10 H18 O4	Sebacic acid	-89106.4	92.2402	level1	BMDB	C08277	HMDB0000792	Lipids and lipid-like molecules	Fatty acids and conjugates	Fatty Acyls	Fatty acyls[FA]				1.71765e+07	1.85807e+07	1.73616e+07	1.95193e+07	1.54226e+07	1.48985e+07	1.70334e+07	1.77517e+07	1.61552e+07	1.61093e+07	1.3745e+07	1.83582e+07	1.70366e+07	1.4513e+07	1.24569e+07	1.72432e+07	1.29049e+07	1.55589e+07	1.81694e+07	1.61332e+07	8.44813e+06	7.42245e+06	6.58228e+06	1.28902e+07	7.56039e+06	4.78209e+06	3.51198e+06	2.72417e+06	3.79047e+06	4.01249e+06	1.59045e+07
B100400	POS	9.569	400.342	C23 H45 N O4	Palmitoylcarnitine	0.0434486	77.1031	level1	BMDB	C02990	HMDB0000222	Lipids and lipid-like molecules	Fatty acid esters	Fatty Acyls	Fatty acyls[FA]	Lipid metabolism	Fatty acid degradation	map00071 Fatty acid degradation; map01212 Fatty acid metabolism	2.9125e+07	2.50603e+07	2.99708e+07	2.68308e+07	1.76789e+07	1.66235e+07	1.78579e+07	1.51076e+07	2.658e+07	2.30857e+07	2.24708e+07	1.57263e+07	1.41516e+07	1.94437e+07	2.60028e+07	2.59395e+07	3.2984e+07	2.70911e+07	2.73101e+07	2.26251e+07	6.10784e+06	3.12218e+06	2.51516e+06	2.91065e+06	3.34759e+06	1.53754e+06	2.23389e+06	4.66263e+06	5.02699e+06	7.62643e+06	6.86808e+06
B200001	NEG	0.707	87.0088	C3 H4 O3	Pyruvic acid	0.467991	99.6498	level1	BMDB	C00022	HMDB0000243	Organic acids and derivatives	Alpha-keto acids and derivatives	Keto acids and derivatives	Organic acids	Carbohydrate metabolism	Glycolysis / Gluconeogenesis	map00010 Glycolysis / Gluconeogenesis; map00020 Citrate cycle (TCA cycle); map00030 Pentose phosphate pathway; map00040 Pentose and glucuronate interconversions; map00053 Ascorbate and aldarate metabolism; map00250 Alanine, aspartate and glutamate metabolism; map00260 Glycine, serine and threonine metabolism; map00261 Monobactam biosynthesis; map00270 Cysteine and methionine metabolism; map00290 …	4.74055e+06	7.43954e+06	5.85931e+06	6.76762e+06	5.81791e+06	5.04987e+06	5.36484e+06	7.54107e+06	8.00177e+06	6.0005e+06	7.81644e+06	7.20606e+06	7.34436e+06	6.65786e+06	6.48733e+06	6.07137e+06	3.77076e+06	7.54076e+06	7.75536e+06	7.35443e+06	1.05095e+07	1.04423e+07	8.51726e+06	9.908e+06	9.00057e+06	9.93039e+06	6.92405e+06	8.48967e+06	4.5751e+06	4.17775e+06	5.45593e+06
B200004	NEG	1.817	111.02	C4 H4 N2 O2	Uracil	0.366881	99.2131	level1	BMDB	C00106	HMDB0000300	Organoheterocyclic compounds	Pyrimidines and pyrimidine derivatives	Diazines	Pyrimidines and pyrimidine derivatives	Nucleotide metabolism	Pyrimidine metabolism	map00240 Pyrimidine metabolism; map00410 beta-Alanine metabolism; map00770 Pantothenate and CoA biosynthesis; map01100 Metabolic pathways; map01232 Nucleotide metabolism	1.7848e+07	1.80058e+07	2.50049e+07	2.50137e+07	2.27976e+07	1.19305e+07	1.85829e+07	1.6002e+07	2.75858e+07	1.96049e+07	2.46608e+07	2.37524e+07	1.92288e+07	2.41215e+07	1.72281e+07	2.41302e+07	1.68618e+07	1.99524e+07	1.72916e+07	1.55755e+07	1.42077e+07	1.6244e+07	9.63995e+06	1.15333e+07	1.75376e+07	2.32793e+07	1.52075e+07	2.24637e+07	1.88327e+07	2.74695e+07	9.88672e+06
B200008	NEG	3.545	163.04	C9 H8 O3	Phenylpyruvic acid	-0.168503	86.1832	level1	BMDB	C00166	HMDB0000205	Benzenoids	Phenylpyruvic acid derivatives	Benzene and substituted derivatives	Benzene and derivatives	Amino acid metabolism	Phenylalanine metabolism	map00360 Phenylalanine metabolism; map00400 Phenylalanine, tyrosine and tryptophan biosynthesis; map00470 D-Amino acid metabolism; map00960 Tropane, piperidine and pyridine alkaloid biosynthesis; map01060 Biosynthesis of plant secondary metabolites; map01100 Metabolic pathways; map01110 Biosynthesis of secondary metabolites; map01210 2-Oxocarboxylic acid metabolism; map01230 Biosynthesis of amino…	3.87144e+06	4.72181e+06	4.29008e+06	7.62274e+06	5.01887e+06	1.2351e+07	6.13756e+06	7.7579e+06	1.03577e+07	5.81201e+06	6.93675e+06	9.03637e+06	5.71586e+06	6.67964e+06	7.68565e+06	8.3553e+06	8.98859e+06	7.30245e+06	1.04943e+07	1.32567e+07	2.07987e+07	1.20607e+07	1.60702e+07	1.04967e+07	1.50507e+07	9.40021e+06	8.01547e+06	2.10607e+07	1.90292e+07	1.18085e+07	1.27216e+07
B200011	POS	2.382	181.097	C9 H8 O4	4-Hydroxyphenylpyruvic acid	266.245	84.3717	level1	BMDB	C01179	HMDB0000707	Benzenoids	Phenylpyruvic acid derivatives	Benzene and substituted derivatives	Benzene and derivatives	Metabolism of cofactors and vitamins	Ubiquinone and other terpenoid-quinone biosynthesis	map00130 Ubiquinone and other terpenoid-quinone biosynthesis; map00261 Monobactam biosynthesis; map00350 Tyrosine metabolism; map00400 Phenylalanine, tyrosine and tryptophan biosynthesis; map00401 Novobiocin biosynthesis; map00950 Isoquinoline alkaloid biosynthesis; map00998 Biosynthesis of various antibiotics; map01055 Biosynthesis of vancomycin group antibiotics; map01060 Biosynthesis of plant …	9.96934e+07	5.05852e+07	4.08561e+07	3.99766e+07	3.22903e+07	2.41551e+07	3.74041e+07	2.71338e+07	2.06683e+07	3.5543e+07	3.75803e+07	5.99068e+07	3.10349e+07	5.08639e+07	3.05076e+07	6.95299e+07	2.21395e+07	5.09274e+07	1.96358e+07	7.32899e+07	1.95913e+07	3.01808e+07	7.53904e+06	3.92906e+06	1.77117e+07	1.11727e+07	9.73942e+06	8.75304e+06	1.47659e+07	9.36466e+06	1.13554e+07
B200014	NEG	4.154	187.007	C7 H8 O4 S	p-Cresol sulfate	-0.394652	88.3149	level1	BMDB		HMDB0011635	Organic acids and derivatives	Arylsulfates	Organic sulfuric acids and derivatives	Organic acids				1.91592e+06	2.81472e+06	2.76755e+06	1.67903e+06	1.17307e+06	1.68333e+06	1.51417e+06	1.79438e+06	1.97961e+06	2.80697e+06	780349	1.03765e+06	1.09672e+06	1.17632e+06	1.80615e+06	2.85793e+06	1.77326e+06	1.9408e+06	1.28139e+06	855565	2.65503e+06	2.79774e+06	1.75061e+06	3.80378e+06	3.10708e+06	3.36881e+06	4.64746e+06	1.11855e+07	1.42806e+07	1.10212e+07	1.80952e+06
B200018	POS	4.822	206.081	C11 H11 N O3	Indolelactic acid	1.25214	95.3238	level1	BMDB	C02043	HMDB0000671	Organoheterocyclic compounds	Indolyl carboxylic acids and derivatives	Indoles and derivatives	Indole and derivatives				1.76212e+06	958899	693127	333174	1.41519e+06	2.62085e+06	1.26239e+06	1.39232e+06	1.81015e+06	2.34515e+06	1.3903e+06	1.78731e+06	1.1507e+06	1.83662e+06	744285	877262	966435	545460	1.18409e+06	679778	2.03082e+06	1.00808e+06	2.64912e+06	1.41594e+06	2.14616e+06	4.21376e+06	3.75599e+06	6.05512e+06	4.67023e+06	1.79039e+06	853415
B200020	NEG	4.179	146.025	C8 H5 N O2	1H-Indole-2,3-dione	-0.117137	90.9664	level1	BMDB	C11129	HMDB0061933	Organoheterocyclic compounds	Indolines	Indoles and derivatives	Indole and derivatives				1.35371e+06	1.58906e+06	2.62802e+06	1.4543e+06	1.69852e+06	554566	678068	959258	762801	1.66038e+06	1.425e+06	943905	1.34262e+06	1.62022e+06	1.59985e+06	1.26201e+06	631236	1.59755e+06	967099	1.06009e+06	544897	974675	512014	305065	647573	621475	671371	825694	547283	779352	241735
B200021	POS	8.863	183.175	C12 H24 O2	Dodecanoic acid	-89971.3	88.9283	level1	BMDB	C02679	HMDB0000638	Lipids and lipid-like molecules	Fatty acids and conjugates	Fatty Acyls	Fatty acyls[FA]	Lipid metabolism	Fatty acid biosynthesis	map00061 Fatty acid biosynthesis; map00333 Prodigiosin biosynthesis; map01100 Metabolic pathways; map01110 Biosynthesis of secondary metabolites	4.25439e+06	4.26005e+06	3.25881e+06	2.83548e+06	3.89286e+06	3.88638e+06	4.25862e+06	4.02684e+06	4.65293e+06	3.75563e+06	3.44987e+06	3.88737e+06	3.47888e+06	4.13534e+06	3.62932e+06	3.67608e+06	3.39722e+06	4.73511e+06	2.17784e+06	2.54141e+06	2.35753e+06	2.52002e+06	2.75962e+06	1.61503e+06	2.75119e+06	2.36065e+06	3.35726e+06	1.93293e+06	5.36879e+06	5.45474e+06	2.68128e+06
B200027	NEG	1.18	151.026	C5 H4 N4 O2	Oxypurinol	-0.966012	96.2368	level1	BMDB	C07599	HMDB0000786	Organoheterocyclic compounds	Purines and purine derivatives	Imidazopyrimidines	Purines and derivatives				1.91942e+08	2.8514e+08	2.49533e+08	2.66531e+08	2.72269e+08	2.99325e+08	2.78078e+08	2.36783e+08	2.75498e+08	2.09312e+08	3.07101e+08	2.99491e+08	2.60421e+08	2.87362e+08	2.57232e+08	2.30349e+08	2.41399e+08	2.92839e+08	1.93089e+08	2.12763e+08	3.79722e+08	2.37755e+08	2.75261e+08	2.49552e+08	3.18909e+08	3.68754e+08	3.61925e+08	3.33232e+08	4.94575e+08	4.5988e+08	2.76238e+08
B200034	POS	6.274	171.138	C10 H18 O2	3-Decenoic acid	1.64508	60.7455	level1	BMDB		HMDB0031002	Lipids and lipid-like molecules	Fatty acids and conjugates	Fatty Acyls	Fatty acyls[FA]				1.21386e+06	1.57611e+06	1.09766e+06	1.38414e+06	1.12065e+06	1.40253e+06	1.40112e+06	1.85698e+06	1.53693e+06	1.762e+06	1.40396e+06	1.31098e+06	1.52113e+06	1.05744e+06	1.3047e+06	1.43068e+06	1.36287e+06	1.06266e+06	1.41679e+06	1.5572e+06	655774	616913	469772	638228	409362	571508	579894	470762	625170	540403	1.63167e+06
B200040	NEG	0.632	147.03	C5 H10 O6	L-Lyxonic acid	-108467	80.4616	level1	BMDB	C05412	HMDB0060255	Organic oxygen compounds	Carbohydrates and carbohydrate conjugates	Organooxygen compounds	Carbohydrates	Carbohydrate metabolism	Pentose and glucuronate interconversions	map00040 Pentose and glucuronate interconversions; map00053 Ascorbate and aldarate metabolism; map01100 Metabolic pathways	2.73109e+06	4.25376e+06	4.78452e+06	2.95403e+06	5.57008e+06	2.90032e+06	4.22581e+06	4.42963e+06	4.98723e+06	1.96893e+06	3.40655e+06	8.83486e+06	4.95543e+06	5.56197e+06	3.72354e+06	2.62038e+06	6.02061e+06	2.78746e+06	1.955e+06	5.49316e+06	1.08138e+07	4.35696e+06	6.58148e+06	5.03614e+06	3.85988e+06	1.106e+07	1.28289e+07	8.8003e+06	2.35292e+07	1.2394e+07	8.89455e+06
B200041	NEG	2.656	165.042	C6 H6 N4 O2	1-Methylxanthine	-0.552214	91.5385	level1	BMDB	C16358	HMDB0010738	Organoheterocyclic compounds	Purines and purine derivatives	Imidazopyrimidines	Purines and derivatives	Biosynthesis of other secondary metabolites	Caffeine metabolism	map00232 Caffeine metabolism; map01100 Metabolic pathways; map01110 Biosynthesis of secondary metabolites; map01120 Microbial metabolism in diverse environments	84030.5	140528	203960	123314	214596	527402	271708	239875	403057	360780	167403	265846	230207	276621	140548	50879.7	352416	349226	237052	119473	599654	200664	585770	403579	553790	512689	457305	920242	1.65339e+06	1.65859e+06	566768
B200052	NEG	2.582	188.986	C6 H6 O5 S	Hydroquinone sulfate	-0.504946	80.8108	level1	BMDB		HMDB0240263	Organic acids and derivatives	Arylsulfates	Organic sulfuric acids and derivatives	Organic acids				2434.43	2105.99	2026.6	2195.92	1865.26	2250.46	2043.65	1724.82	2002.11	1800.4	1983.96	1887.33	1900.13	1844.55	2159.28	1892.67	2078.86	1966.74	2047.98	1719.87	5515.87	4601.75	4964.18	3184.1	7334.19	7788.25	4132.58	5541.16	3519.51	3066.78	6482.52
B200061	NEG	1.348	115.04	C5 H8 O3	Levulinic acid	0.296585	87.0068	level1	BMDB		HMDB0000720	Organic acids and derivatives	Gamma-keto acids and derivatives	Keto acids and derivatives	Organic acids				8.43468e+06	3.12141e+07	1.87916e+07	3.7298e+07	1.83724e+07	1.75515e+07	1.54482e+07	3.51287e+07	4.79579e+07	3.0556e+07	5.42517e+07	2.8368e+07	2.12715e+07	2.58246e+07	2.25381e+07	2.38857e+07	1.50066e+07	2.23841e+07	3.82057e+07	4.51533e+07	3.10528e+07	3.51949e+07	1.78803e+07	3.93899e+07	2.05716e+07	2.6522e+07	3.82021e+07	4.62773e+07	2.21481e+07	8.14184e+07	2.39543e+07
B200068	POS	3.541	114.092	C6 H11 N O	Epsilon-caprolactam	2.05531	87.1222	level1	BMDB	C06593	HMDB0062769	Organoheterocyclic compounds	Caprolactams	Lactams	Caprolactams	Xenobiotics biodegradation and metabolism	Caprolactam degradation	map00930 Caprolactam degradation; map01100 Metabolic pathways; map01120 Microbial metabolism in diverse environments	1.7927e+06	2.42243e+06	3.35315e+06	2.87461e+06	1.43519e+06	1.6527e+06	1.94496e+06	1.92606e+06	1.08815e+06	3.15537e+06	3.00102e+06	1.81862e+06	2.45742e+06	1.78558e+06	3.51729e+06	1.48725e+06	3.16932e+06	3.1681e+06	2.41351e+06	1.10369e+06	1.86875e+06	2.84632e+06	1.75141e+06	2.41022e+06	2.06282e+06	1.98781e+06	2.28172e+06	3.07315e+06	2.96383e+06	2.99489e+06	1.70555e+06
B200069	POS	1.325	144.066	C6 H9 N O3	6-Oxopiperidine-2-carboxylic acid	1.87931	82.4397	level1	BMDB		HMDB0061705	Organic acids and derivatives	Amino acids, peptides, and analogues	Carboxylic acids and derivatives	Amino acids, peptides, and analogues				1.33961e+07	1.03451e+07	6.43923e+06	9.79233e+06	7.86675e+06	8.92608e+06	6.33749e+06	6.629e+06	1.88018e+07	8.27145e+06	9.20654e+06	9.16594e+06	1.07157e+07	1.17547e+07	1.53984e+07	7.4482e+06	7.82301e+06	1.62233e+07	1.69446e+07	7.54868e+06	7.51035e+06	1.27209e+07	8.65732e+06	8.52498e+06	1.05501e+07	1.12929e+07	8.6526e+06	9.08606e+06	1.57433e+07	1.04893e+07	9.20876e+06
B200076	POS	3.318	205.098	C11 H12 N2 O2	(+/-)-Tryptophan	1.81785	98.5127	level1	BMDB	C00806	HMDB0030396	Organoheterocyclic compounds	Indolyl carboxylic acids and derivatives	Indoles and derivatives	Indole and derivatives				7.82925e+07	3.92069e+07	2.56101e+07	3.28383e+07	1.93607e+07	3.10377e+07	3.22117e+07	2.62608e+07	2.7784e+07	2.88889e+07	1.31747e+07	2.21753e+07	1.50221e+07	2.50813e+07	1.97786e+07	3.40383e+07	2.17708e+07	2.965e+07	2.67997e+07	1.81963e+07	1.6762e+08	1.06796e+08	2.02742e+08	8.19546e+07	2.57235e+08	2.69184e+08	1.42641e+08	2.93496e+08	9.5557e+07	4.52479e+07	5.06041e+07
B200079	POS	0.801	114.055	C5 H7 N O2	1-Pyrroline-5-carboxylic acid	1.49254	82.7945	level1	BMDB	C03912	HMDB0001301	Organic acids and derivatives	Amino acids, peptides, and analogues	Carboxylic acids and derivatives	Amino acids, peptides, and analogues	Amino acid metabolism	Alanine, aspartate and glutamate metabolism	map00250 Alanine, aspartate and glutamate metabolism; map00330 Arginine and proline metabolism; map00332 Carbapenem biosynthesis; map01100 Metabolic pathways; map01110 Biosynthesis of secondary metabolites; map01230 Biosynthesis of amino acids	1.34788e+07	1.05297e+07	8.97226e+06	9.70202e+06	9.03934e+06	4.96963e+06	8.08318e+06	8.8164e+06	9.32985e+06	1.42588e+07	1.3915e+07	8.56235e+06	9.5326e+06	8.92823e+06	1.06013e+07	1.06034e+07	7.67804e+06	1.17721e+07	8.42457e+06	1.2379e+07	3.78761e+06	7.86465e+06	4.74651e+06	4.43917e+06	5.74727e+06	4.36428e+06	4.89739e+06	6.11543e+06	1.45009e+07	4.21428e+07	3.65732e+06
B200080	POS	0.736	145.134	C7 H16 N2 O	N-Acetylcadaverine	1.10076	95.3652	level1	BMDB		HMDB0002284	Organic acids and derivatives	Carboxylic acid derivatives	Carboxylic acids and derivatives	Organic acids				7.98442e+07	1.23831e+08	7.07432e+07	1.09918e+08	1.10482e+08	3.22721e+08	1.63356e+08	1.27005e+08	2.43918e+08	3.17476e+08	4.90148e+07	8.8016e+07	6.01997e+07	1.24288e+08	8.4402e+07	1.26714e+08	4.40675e+07	2.84046e+08	4.73928e+07	1.07578e+08	1.18077e+07	1.70061e+07	1.89239e+07	8.85017e+06	1.60701e+07	2.89604e+08	2.84546e+08	9.36819e+07	1.70798e+08	8.53112e+07	3.72775e+07
B200087	POS	9.346	199.17	C12 H22 O2	5Z-Dodecenoic acid	1.25856	63.9947	level1	BMDB		HMDB0000529	Lipids and lipid-like molecules	Fatty acids and conjugates	Fatty Acyls	Fatty acyls[FA]				956368	861411	701263	862108	894702	930424	779882	449744	910505	719498	812052	898150	711137	1.05391e+06	687527	683570	807429	962468	864600	290645	1.14189e+06	828847	880469	950024	1.34937e+06	1.54834e+06	2.15368e+06	1.9739e+06	4.09585e+06	5.3084e+06	848777
B200091	POS	0.673	115.087	C5 H10 N2 O	3-Amino-2-piperidone	0.834085	75.3993	level1	BMDB		HMDB0000323	Organic acids and derivatives	Amino acids, peptides, and analogues	Carboxylic acids and derivatives	Amino acids, peptides, and analogues				9.26791e+06	6.37714e+06	4.0831e+06	6.90836e+06	7.30798e+06	1.03106e+07	5.35445e+06	4.8684e+06	7.85922e+06	3.21584e+06	5.52727e+06	8.97594e+06	5.40879e+06	9.80413e+06	6.61972e+06	5.08286e+06	4.80949e+06	3.463e+06	7.07637e+06	5.22029e+06	1.93918e+07	9.50134e+06	9.01884e+06	9.19291e+06	1.92409e+07	1.13224e+07	9.32645e+06	2.44048e+07	8.46518e+06	8.00793e+06	5.25133e+06
B200097	POS	5.789	190.087	C11 H11 N O2	Indole-3-propionic acid	1.6154	93.8805	level1	BMDB		HMDB0002302	Organoheterocyclic compounds	Indolyl carboxylic acids and derivatives	Indoles and derivatives	Indole and derivatives				1.9483e+07	2.65744e+07	2.50317e+07	1.95535e+07	1.58949e+07	1.80272e+07	2.33959e+07	1.7449e+07	1.83897e+07	2.56516e+07	1.81489e+07	2.39635e+07	2.246e+07	1.98713e+07	1.52073e+07	1.65638e+07	1.82187e+07	2.3832e+07	2.56026e+07	1.9132e+07	1.58649e+07	1.52827e+07	2.1895e+07	1.11486e+07	2.22053e+07	2.42232e+07	2.43133e+07	1.88232e+07	5.47315e+07	3.81585e+07	2.00844e+07
B200105	POS	0.776	132.077	C6 H13 N O2	Alanine betaine	-191.27	94.34	level1	BMDB		HMDB0240479								97931	306067	595165	257959	307773	158492	62308.9	1.07722e+06	803229	1.10048e+06	95851.5	118375	66566	83035.8	111809	677065	408906	686149	222101	513275	1.00113e+06	1.1653e+06	715640	3.54399e+06	2.84654e+06	1.77592e+06	1.47072e+06	9.3022e+06	6.29375e+06	7.35151e+06	2.43456e+06
B200107	POS	1.566	175.108	C7 H14 N2 O3	Valylglycine	1.76325	91.301	level1	BMDB		HMDB0029127	Organic acids and derivatives	Amino acids, peptides, and analogues	Carboxylic acids and derivatives	Amino acids, peptides, and analogues				4.09617e+06	3.01712e+06	1.40762e+06	3.8937e+06	648275	1.92086e+06	2.26634e+06	1.3957e+06	2.4782e+06	1.54889e+06	1.82986e+06	924383	599133	1.10828e+06	832810	2.68226e+06	1.1873e+06	1.22436e+06	1.48384e+06	1.60546e+06	3.46232e+06	2.31471e+06	6.26651e+06	3.32248e+06	6.44995e+06	1.52875e+07	7.89156e+06	3.07157e+07	5.06159e+06	6.26004e+06	2.11894e+06
B200112	POS	3.686	160.097	C7 H13 N O3	N-Acetylvaline	1.75678	73.4064	level1	BMDB		HMDB0011757	Organic acids and derivatives	Amino acids, peptides, and analogues	Carboxylic acids and derivatives	Amino acids, peptides, and analogues				5.36231e+06	5.52463e+06	3.51109e+06	2.88441e+06	4.10401e+06	3.44733e+06	4.28144e+06	4.59685e+06	5.39993e+06	5.67987e+06	3.91959e+06	4.46976e+06	3.4098e+06	4.83759e+06	3.66819e+06	4.82441e+06	2.9483e+06	3.93545e+06	3.24599e+06	3.57743e+06	4.02327e+06	6.12032e+06	3.13859e+06	2.80344e+06	4.72505e+06	6.64723e+06	4.99514e+06	3.83731e+06	4.41108e+06	3.57486e+06	2.74943e+06
B200123	POS	1.045	137.046	C5 H4 N4 O	Allopurinol	1.74861	94.0464	level1	BMDB		HMDB0014581	Organoheterocyclic compounds	Pyrazolo[3,4-d]pyrimidines	Pyrazolopyrimidines	Pyrazolo[3,4-d]pyrimidines				8.41567e+08	7.92003e+08	7.87748e+08	8.0385e+08	6.80184e+08	5.71334e+08	6.61677e+08	5.86464e+08	6.56388e+08	8.53806e+08	8.41424e+08	4.93249e+08	5.27205e+08	3.49315e+08	5.62089e+08	6.03391e+08	7.46331e+08	6.89066e+08	8.57064e+08	6.67522e+08	4.62985e+08	3.96271e+08	4.646e+08	4.1603e+08	4.58474e+08	4.12689e+08	4.09543e+08	4.18557e+08	7.22022e+08	1.35839e+09	7.39127e+08
B200124	NEG	9.055	421.296	C24 H40 O3	Isoallolithocholic acid	122257	89.6774	level1	BMDB		HMDB0000713	Lipids and lipid-like molecules	Bile acids, alcohols and derivatives	Steroids and steroid derivatives	Bile acids, alcohols and derivatives				14433.3	57463.3	38250.6	48889	61378.9	91259.9	23738.9	70901.3	2616.52	27483	109869	6186.47	15211.1	26263.7	129324	31111.9	883730	31925.2	2880.71	171150	83956.4	110434	130466	58440.8	282318	42774.3	530420	507272	1.31898e+06	537984	769102
B200126	NEG	9.428	375.29	C24 H40 O3	Lithocholic acid	-1.03553	96.7587	level1	BMDB	C03990	HMDB0000761	Lipids and lipid-like molecules	Bile acids, alcohols and derivatives	Steroids and steroid derivatives	Bile acids, alcohols and derivatives	Lipid metabolism	Secondary bile acid biosynthesis	map00121 Secondary bile acid biosynthesis; map04976 Bile secretion	245305	301179	87111.9	154829	275655	87746.7	163273	105390	52591.3	91469.9	136843	52562.7	48582.5	51104.7	167276	74325.4	4.06851e+06	87780.1	18274.7	1.14157e+06	319331	1.26339e+06	2.49034e+06	21432.6	1.8815e+06	258132	2.03839e+06	2.83243e+06	5.57476e+06	2.51552e+06	3.38487e+06
B200128	NEG	7.838	435.275	C24 H38 O4	12-Ketodeoxycholic acid	-1.02639	89.3976	level1	BMDB		HMDB0000328	Lipids and lipid-like molecules	Bile acids, alcohols and derivatives	Steroids and steroid derivatives	Bile acids, alcohols and derivatives				268402	199611	233740	192416	354603	179601	139593	257275	126122	232529	323505	237905	245236	302540	266880	197015	327560	177205	174355	171308	203803	162847	158150	270427	270802	328283	282898	399082	298561	171958	627486
B200129	POS	8.242	391.284	C24 H38 O4	Nutriacholic acid	-0.0852463	96.5441	level1	BMDB		HMDB0000467	Lipids and lipid-like molecules	Bile acids, alcohols and derivatives	Steroids and steroid derivatives	Bile acids, alcohols and derivatives				1.28904e+06	527846	367810	514261	366882	1.06269e+06	1.41437e+06	553503	1.15975e+06	1.18776e+06	579328	1.69389e+06	1.27738e+06	518705	656552	1.22716e+06	1.17735e+06	388998	511559	838924	594369	520271	1.62079e+06	523393	727713	691681	670343	1.86576e+06	979678	1.07986e+06	650074
B200135	POS	8.188	415.282	C24 H40 O4	Isoursodeoxycholic acid	56035.1	79.0874	level1	BMDB	C17662	HMDB0000686	Lipids and lipid-like molecules	Bile acids, alcohols and derivatives	Steroids and steroid derivatives	Bile acids, alcohols and derivatives	Lipid metabolism	Secondary bile acid biosynthesis	map00121 Secondary bile acid biosynthesis	20501.8	50438.4	22508.6	31678.5	14624.6	65557.7	18247.2	34232.2	19004.3	54372	80359.1	17430	111163	35827.4	43618.8	71140	146917	44723.9	19536.8	26914.1	16404.9	18554.1	21729.4	19090.6	17129.9	21009.4	122082	28000.5	34057.4	27901.5	202725
B200136	POS	8.835	410.326	C24 H40 O4	Isohyodeoxycholic acid	43402.6	92.7488	level1	BMDB		HMDB0000664	Lipids and lipid-like molecules	Bile acids, alcohols and derivatives	Steroids and steroid derivatives	Bile acids, alcohols and derivatives				241538	214933	164622	205593	274050	701435	313627	267443	242582	287520	262063	388147	275863	260370	555173	441716	1.80607e+06	220270	307861	236870	381698	823442	1.26114e+06	1.06079e+06	1.48105e+06	1.16297e+06	2.18741e+06	2.56534e+06	1.39435e+06	2.50778e+06	783667
B200137	POS	7.949	412.306	C23 H38 O5	Norcholic acid	43184.9	91.0477	level1	BMDB		HMDB0255727	Lipids and lipid-like molecules	Bile acids, alcohols and derivatives	Steroids and steroid derivatives	Bile acids, alcohols and derivatives				8219.06	10999.6	18938.3	11124.2	19887.2	5658.34	13807.8	20431.8	21169.6	33508.9	15558.6	8622.19	16901.2	179732	15775.4	13316	279120	11393.2	6103.59	14343.5	51914.3	92813.9	135395	38144.1	76256.8	82232	85773.1	146844	64768.4	82085.9	71606.1
B200138	POS	7.083	403.248	C24 H34 O5	Dehydrocholic acid	0.0678517	70.8963	level1	BMDB										437442	478853	772621	888437	617428	653991	499054	589723	532171	334926	637006	633737	445836	354646	694454	330441	912298	348686	120556	557852	189632	298513	306957	195865	175222	141323	285171	281804	169002	169264	255818
B200139	NEG	6.655	449.254	C24 H36 O5	7,12-diketolithocholic acid	-1.1889	82.3902	level1	BMDB										1.27957e+06	1.32627e+06	1.87051e+06	1.70306e+06	1.51547e+06	839109	906871	1.18262e+06	623074	1.01914e+06	1.14671e+06	1.11689e+06	848257	957910	1.03671e+06	861153	1.60809e+06	905677	539168	693305	728641	512791	790772	667266	670836	743987	775670	522632	645500	534673	920696
B200141	POS	8.04	424.306	C24 H38 O5	3-Oxocholic acid	41909.4	96.2951	level1	BMDB		HMDB0000502	Lipids and lipid-like molecules	Bile acids, alcohols and derivatives	Steroids and steroid derivatives	Bile acids, alcohols and derivatives				72064	60476.4	26369	42628.9	70987.8	32790.3	52508.2	98129.8	92404.6	12901.7	105755	56984.7	65851.4	65492.1	147106	74446.8	262153	111747	47358.7	114920	70319.4	97499.5	248698	75651.5	192199	90527.1	140396	714875	182359	312834	188921
B200143	POS	8.029	426.322	C24 H40 O5	alpha-Muricholic acid	41702.8	90.1908	level1	BMDB	C17647	HMDB0000506	Lipids and lipid-like molecules	Bile acids, alcohols and derivatives	Steroids and steroid derivatives	Bile acids, alcohols and derivatives	Lipid metabolism	Secondary bile acid biosynthesis	map00121 Secondary bile acid biosynthesis	534645	641333	468921	488307	563396	861220	460593	1.12224e+06	765480	479727	1.19648e+06	1.01498e+06	547211	316214	1.11923e+06	544959	1.73157e+06	417568	328409	1.23218e+06	485324	478447	500070	377718	624455	375031	641390	1.06303e+06	550624	776156	520000
B200144	POS	8.211	426.322	C24 H40 O5	3a,6b,7b-Trihydroxy-5b-cholanoic acid	41702.7	83.7383	level1	BMDB	C17726	HMDB0000415	Lipids and lipid-like molecules	Bile acids, alcohols and derivatives	Steroids and steroid derivatives	Bile acids, alcohols and derivatives	Lipid metabolism	Secondary bile acid biosynthesis	map00121 Secondary bile acid biosynthesis	69993.2	173591	79812.2	97732.8	110009	42483	118663	165537	45252.9	21936.4	241500	69880.7	65458	173325	333508	126982	87077.7	115468	19525.4	164263	223019	662927	395445	36255.1	974832	264202	3.2812e+06	1.29459e+06	1.66088e+06	1.51503e+06	2.74411e+06
B200146	POS	7.97	426.322	C24 H40 O5	Ursocholic acid	41702.8	85.2942	level1	BMDB	C17644	HMDB0000917	Lipids and lipid-like molecules	Bile acids, alcohols and derivatives	Steroids and steroid derivatives	Bile acids, alcohols and derivatives	Lipid metabolism	Secondary bile acid biosynthesis	map00121 Secondary bile acid biosynthesis	114198	141655	139079	233044	291539	176564	86698.1	240530	147075	136262	286520	170598	200120	124755	510327	179451	249926	230565	106445	194369	90996.2	513410	110318	146423	251840	191576	264959	938237	514147	565878	328843
B200147	POS	7.633	426.322	C24 H40 O5	3b,7a,12a-Trihydroxy-5b-cholanoic acid	41702.6	93.4788	level1	BMDB		HMDB0000419	Lipids and lipid-like molecules	Diradylglycerols	Glycerolipids	Glycerolipids[GL]				2.02366e+06	3.07522e+06	1.90545e+06	1.9372e+06	2.42394e+06	2.04413e+06	1.36654e+06	3.51231e+06	2.38514e+06	2.04951e+06	3.32318e+06	3.0649e+06	2.44413e+06	1.776e+06	4.48538e+06	2.46478e+06	6.11505e+06	2.32636e+06	1.4955e+06	3.05674e+06	1.58505e+06	3.09719e+06	5.69528e+06	1.55984e+06	2.39796e+06	1.98187e+06	2.09443e+06	2.96624e+06	1.68664e+06	1.73353e+06	1.87522e+06
B200155	NEG	8.356	498.289	C26 H45 N O6 S	Taurochenodeoxycholic acid	-1.75778	97.8826	level1	BMDB	C05465	HMDB0000951	Lipids and lipid-like molecules	Bile acids, alcohols and derivatives	Steroids and steroid derivatives	Bile acids, alcohols and derivatives	Lipid metabolism	Primary bile acid biosynthesis	map00120 Primary bile acid biosynthesis; map00121 Secondary bile acid biosynthesis; map04976 Bile secretion; map04979 Cholesterol metabolism	81038.4	54160	33334.4	44450.9	67333.3	86605.2	88278	226106	85065.3	55828.1	89527.3	134906	71963.8	60930.8	821124	110996	398114	79363.3	113985	121706	225396	231819	264334	266374	343677	154187	101446	196239	237432	102035	511496
B200168	NEG	5.077	144.045	C9 H7 N O	Indole-3-carboxaldehyde	-1.18503	98.8165	level1	BMDB	C08493	HMDB0029737	Organoheterocyclic compounds	Indoles	Indoles and derivatives	Indoles				2.20724e+08	2.50553e+08	1.57515e+08	1.75795e+08	1.80075e+08	2.18774e+08	2.4776e+08	2.30664e+08	2.99761e+08	2.53392e+08	2.03286e+08	1.7437e+08	1.14326e+08	1.9038e+08	1.78792e+08	2.03613e+08	9.28121e+07	1.64738e+08	1.62714e+08	1.96539e+08	3.88374e+08	4.47806e+08	3.28546e+08	2.93798e+08	4.56083e+08	3.74896e+08	3.19072e+08	2.92166e+08	3.6679e+08	4.27662e+08	2.14912e+08
B200172	POS	3.994	249.123	C13 H16 N2 O3	6-Hydroxymelatonin	0.447026	70.7925	level1	BMDB	C05643	HMDB0004081	Organoheterocyclic compounds	Hydroxyindoles	Indoles and derivatives	Indole and derivatives	Amino acid metabolism	Tryptophan metabolism	map00380 Tryptophan metabolism	1.59407e+06	1.05983e+06	1.4485e+06	979185	932674	945339	843136	639905	996238	1.06434e+06	1.27877e+06	1.48098e+06	875945	1.21433e+06	1.56792e+06	746412	1.81215e+06	1.0817e+06	777705	775057	240257	116895	113975	353659	215862	747911	438158	670338	441995	461592	571611
B200174	NEG	7.811	157.123	C9 H18 O2	Pelargonic acid	-0.631598	90.2223	level1	BMDB	C01601	HMDB0000847	Lipids and lipid-like molecules	Fatty acids and conjugates	Fatty Acyls	Fatty acyls[FA]				1.51188e+06	1.86789e+06	1.64783e+06	2.40192e+06	1.10335e+06	653737	1.56581e+06	1.54486e+06	1.5057e+06	894193	1.83577e+06	1.39142e+06	2.38628e+06	1.835e+06	1.64633e+06	1.64351e+06	1.57736e+06	2.03465e+06	2.84558e+06	1.95534e+06	381794	434481	510717	276800	282309	216069	369824	216057	407242	443319	797853
B200177	NEG	10.084	279.233	C18 H32 O2	Linoleic acid	-1.62518	94.6935	level1	BMDB	C01595	HMDB0000673	Lipids and lipid-like molecules	Lineolic acids and derivatives	Fatty Acyls	Fatty acyls[FA]	Lipid metabolism	Linoleic acid metabolism	map00591 Linoleic acid metabolism; map01040 Biosynthesis of unsaturated fatty acids; map01060 Biosynthesis of plant secondary metabolites; map01100 Metabolic pathways	1.85743e+07	1.63747e+07	2.49274e+07	1.89055e+07	3.03676e+07	7.56243e+06	1.91485e+07	1.17768e+07	9.3187e+06	1.29753e+07	2.66105e+07	1.67625e+07	1.42334e+07	2.16154e+07	1.68529e+07	1.55228e+07	1.83923e+07	1.32957e+07	1.05499e+07	1.63306e+07	1.3261e+07	1.21529e+07	1.43138e+07	1.1868e+07	1.16829e+07	8.21523e+06	2.14874e+07	1.03967e+07	4.44719e+07	3.94366e+07	1.9282e+07
B200183	POS	1.022	124.04	C6 H5 N O2	Nicotinic acid	1.98174	95.2988	level1	BMDB	C00253	HMDB0001488	Organoheterocyclic compounds	Pyridinecarboxylic acids and derivatives	Pyridines and derivatives	Pyridine and derivatives	Metabolism of cofactors and vitamins	Nicotinate and nicotinamide metabolism	map00760 Nicotinate and nicotinamide metabolism; map00960 Tropane, piperidine and pyridine alkaloid biosynthesis; map01060 Biosynthesis of plant secondary metabolites; map01064 Biosynthesis of alkaloids derived from ornithine, lysine and nicotinic acid; map01100 Metabolic pathways; map01110 Biosynthesis of secondary metabolites; map01120 Microbial metabolism in diverse environments; map01240 Bios…	6.2545e+08	7.344e+08	6.39215e+08	6.58107e+08	6.96811e+08	5.86395e+08	6.52001e+08	5.68004e+08	6.112e+08	6.49592e+08	6.54e+08	7.33493e+08	6.96644e+08	7.25697e+08	6.53883e+08	6.04219e+08	7.44655e+08	5.95613e+08	7.00408e+08	6.38524e+08	8.3019e+08	6.92115e+08	6.0758e+08	7.89458e+08	6.96962e+08	7.62155e+08	6.23829e+08	4.25586e+08	1.08841e+09	7.17225e+08	9.77273e+08
B300011	NEG	0.909	117.056	C5 H10 O3	3-Hydroxyvaleric acid	0.840063	82.9475	level1	BMDB		HMDB0000531	Lipids and lipid-like molecules	Fatty acids and conjugates	Fatty Acyls	Fatty acyls[FA]				6.96401e+06	5.34582e+06	2.6075e+06	2.29981e+06	9.89797e+06	5.61551e+06	7.4476e+06	2.22285e+06	7.0965e+06	6.90554e+06	1.46337e+06	9.61223e+06	4.12869e+06	6.97529e+06	2.60612e+06	1.27762e+06	3.42602e+06	969699	1.37661e+06	2.28159e+06	1.24941e+06	4.04913e+06	2.37496e+07	6.25029e+06	1.843e+06	1.02602e+06	4.68662e+07	4.15112e+07	1.67437e+07	3.49385e+07	3.07283e+06
B300012	NEG	2.378	131.071	C6 H12 O3	5-Hydroxyhexanoic acid	-0.109612	95.1499	level1	BMDB		HMDB0000525	Lipids and lipid-like molecules	Fatty acids and conjugates	Fatty Acyls	Fatty acyls[FA]				3.15689e+06	3.01809e+06	2.69013e+06	2.61471e+06	7.30782e+06	4.19735e+06	4.98237e+06	3.3849e+06	3.74649e+06	4.57387e+06	3.22003e+06	8.33178e+06	4.25606e+06	6.28744e+06	3.10236e+06	2.4047e+06	4.34141e+06	6.89894e+06	5.45764e+06	3.38251e+06	2.3005e+07	5.93629e+06	4.34649e+07	8.44309e+06	2.41132e+07	5.10502e+07	5.99422e+07	6.12384e+07	2.50009e+07	3.5407e+07	3.31049e+06
B300013	NEG	0.707	133.051	C5 H10 O4	2,3-Dihydroxy-2-methylbutanoic acid	-0.278166	89.5894	level1	BMDB		HMDB0029576	Lipids and lipid-like molecules	Fatty acids and conjugates	Fatty Acyls	Fatty acyls[FA]				422220	411007	317524	292532	411964	857163	488848	570076	511351	590192	480279	526740	403396	461243	398823	498702	302875	407460	347247	381820	1.31574e+06	1.7758e+06	8.55125e+06	2.70379e+06	1.78329e+06	7.31634e+06	3.95433e+06	3.47244e+07	4.89787e+06	1.13282e+07	1.89589e+06
B300014	NEG	0.621	133.014	C5 H10 O4	(R)-2,3-Dihydroxy-isovalerate	-271.806	99.259	level1	BMDB	C04272	HMDB0012141	Lipids and lipid-like molecules	Fatty acids and conjugates	Fatty Acyls	Fatty acyls[FA]	Amino acid metabolism	Valine, leucine and isoleucine biosynthesis	map00290 Valine, leucine and isoleucine biosynthesis; map00770 Pantothenate and CoA biosynthesis; map01100 Metabolic pathways; map01110 Biosynthesis of secondary metabolites; map01210 2-Oxocarboxylic acid metabolism; map01230 Biosynthesis of amino acids	4.89984e+07	3.53903e+07	3.38418e+07	1.99425e+07	3.31962e+07	4.51032e+07	3.68621e+07	4.35745e+07	4.57267e+07	3.29986e+07	4.87985e+07	2.81609e+07	3.50176e+07	3.33122e+07	3.98277e+07	3.44382e+07	3.04637e+07	2.33775e+07	3.96344e+07	2.45643e+07	7.33205e+07	1.20822e+08	6.0137e+07	6.05188e+07	8.09209e+07	8.50353e+07	6.02956e+07	7.94084e+07	7.5177e+07	2.69776e+07	1.78627e+07
B300016	NEG	4.477	149.061	C9 H10 O2	Hydrocinnamic acid	-1.14289	99.8751	level1	BMDB	C05629	HMDB0000764	Phenylpropanoids and polyketides		Phenylpropanoic acids	Phenylpropanoic acids	Amino acid metabolism	Phenylalanine metabolism	map00360 Phenylalanine metabolism; map01100 Metabolic pathways; map01120 Microbial metabolism in diverse environments; map01220 Degradation of aromatic compounds	5.06054e+07	5.07363e+07	3.76076e+07	2.23902e+07	2.49814e+07	5.02097e+07	6.0137e+07	6.04618e+07	6.68606e+07	1.06917e+08	4.51618e+07	5.93578e+07	5.54659e+07	4.7193e+07	3.40741e+07	6.36847e+07	3.60603e+07	4.97631e+07	9.53862e+07	6.93453e+07	5.55695e+06	1.19101e+07	1.01322e+07	1.57771e+07	1.41628e+07	7.06422e+06	5.8107e+06	4.5833e+06	3.04066e+06	4.37138e+06	2.69195e+07
B300020	NEG	1.626	159.066	C7 H12 O4	3-Methyladipic acid	-0.440724	90.6094	level1	BMDB		HMDB0000555	Lipids and lipid-like molecules	Fatty acids and conjugates	Fatty Acyls	Fatty acyls[FA]				4.41219e+06	4.70297e+06	4.61351e+06	5.78617e+06	7.0223e+06	5.32699e+06	4.66839e+06	5.44406e+06	4.50429e+06	3.86579e+06	4.55669e+06	4.79369e+06	6.21381e+06	5.36656e+06	5.16409e+06	3.9986e+06	4.52105e+06	4.41019e+06	4.55448e+06	6.03296e+06	1.09779e+06	1.5733e+06	1.08409e+06	1.29016e+06	1.35757e+06	2.2821e+06	1.6003e+06	869952	1.97683e+06	2.65143e+06	5.58611e+06
B300023	POS	4.774	167.071	C9 H10 O3	Desaminotyrosine	1.52907	82.651	level1	BMDB	C01744	HMDB0002199	Phenylpropanoids and polyketides		Phenylpropanoic acids	Phenylpropanoic acids	Global and overview maps	Metabolic pathways	map00946 Degradation of flavonoids; map01100 Metabolic pathways	220215	329393	246394	284742	75369.8	264996	223384	249184	243828	271853	260747	214456	285949	197618	258112	241648	388729	231123	309302	234516	436401	333383	757027	1.77108e+06	380872	272955	227194	569204	1.22858e+06	263241	1.32007e+06
B300024	NEG	0.724	166.018	C4 H9 N O4 S	N-Acetyltaurine	-0.85048	92.5702	level1	BMDB		HMDB0240253	Organic acids and derivatives	Organosulfonic acids and derivatives	Organic sulfonic acids and derivatives	Organic acids				2.34536e+06	3.50173e+06	3.52951e+06	3.386e+07	5.23866e+06	2.63535e+06	3.12853e+07	8.8415e+06	3.90617e+07	2.35085e+07	2.89974e+07	3.40482e+06	8.75518e+06	4.60412e+07	3.72641e+07	3.34316e+06	3.67455e+07	2.46347e+07	1.74243e+07	2.35449e+07	3.18906e+06	7.3074e+07	4.71462e+07	9.5856e+06	3.94285e+07	5.28587e+07	1.63072e+07	8.80067e+06	1.27147e+07	1.55823e+06	6.42552e+06
B300029	NEG	1.625	187.109	C8 H16 N2 O3	Glycylleucine	-0.508447	91.3012	level1	BMDB	C02155	HMDB0000759	Organic acids and derivatives	Amino acids, peptides, and analogues	Carboxylic acids and derivatives	Amino acids, peptides, and analogues				981570	784452	406949	1.31816e+06	258521	422702	447171	390045	426470	460189	468415	320061	312686	397225	250374	698895	401236	415506	152591	473254	928003	489600	1.86049e+06	1.4287e+06	2.10209e+06	3.86433e+06	1.59252e+06	6.7607e+06	1.62828e+06	1.27817e+06	514476
B300035	POS	4.196	199.06	C9 H10 O5	Syringic acid	1.74149	88.9415	level1	BMDB	C10833	HMDB0002085	Benzenoids	Benzoic acids and derivatives	Benzene and substituted derivatives	Benzene and derivatives	Xenobiotics biodegradation and metabolism	Aminobenzoate degradation	map00627 Aminobenzoate degradation; map01120 Microbial metabolism in diverse environments	442545	508037	548617	424427	578196	402360	457422	218287	916963	503005	464293	649521	453741	973005	548665	394015	400612	753426	692461	1.31269e+06	2.10741e+06	321012	745003	1.88133e+06	344853	718347	867975	319876	1.25676e+06	501786	755615
B300038	NEG	2.089	206.046	C7 H13 N O4 S	N-Acetylmethionine sulfoxide	-17.6045	98.7559	level1	BMDB		HMDB0240343	Organic acids and derivatives	Amino acids, peptides, and analogues	Carboxylic acids and derivatives	Amino acids, peptides, and analogues				421701	228646	269751	321367	313705	1.88996e+06	932269	307811	997423	274815	366174	1.13076e+06	988420	845587	694376	1.39873e+06	1.38673e+06	783732	2.23213e+06	322204	1.02004e+08	3.0136e+07	8.52206e+07	8.14965e+07	6.87171e+07	2.7041e+07	2.12602e+07	3.06149e+07	2.3313e+07	1.91786e+07	2.95277e+07
B300039	NEG	5.392	215.129	C11 H20 O4	Undecanedioic acid	-1.24145	99.0689	level1	BMDB		HMDB0000888	Lipids and lipid-like molecules	Fatty acids and conjugates	Fatty Acyls	Fatty acyls[FA]				5.52194e+06	5.80624e+06	5.8679e+06	6.11098e+06	4.05508e+06	2.78479e+06	3.25835e+06	3.45486e+06	4.74926e+06	3.58859e+06	5.56739e+06	4.16795e+06	4.71361e+06	4.64595e+06	4.53907e+06	5.16836e+06	3.27469e+06	5.42271e+06	5.87881e+06	4.65133e+06	1.93644e+06	2.12871e+06	1.92597e+06	1.95682e+06	2.20628e+06	1.55979e+06	1.75711e+06	1.43513e+06	2.4644e+06	5.23424e+06	3.40832e+06
B300040	NEG	8.204	215.165	C12 H24 O3	2-hydroxylaurate	-1.32593	91.8468	level1	BMDB										617908	727813	501783	635362	748518	665587	768088	622993	637474	552091	893053	680933	588813	691769	961698	852675	654350	825442	552730	846813	1.01135e+06	1.39308e+06	1.65745e+06	1.44879e+06	1.0785e+06	1.45809e+06	1.06032e+06	857510	1.88483e+06	1.52183e+06	1.40658e+06
B300042	NEG	0.684	179.056	C6 H12 O6	Levoinositol	-0.997125	96.787	level1	BMDB	C19891	HMDB0034220	Organic oxygen compounds	Alcohols and polyols	Organooxygen compounds	Alcohols	Carbohydrate metabolism	Inositol phosphate metabolism	map00562 Inositol phosphate metabolism; map01100 Metabolic pathways; map01120 Microbial metabolism in diverse environments	1.41003e+07	1.36794e+07	5.26708e+06	5.42756e+06	6.06162e+06	3.10776e+07	2.76721e+07	2.63545e+07	2.75468e+07	1.31732e+07	1.10255e+07	8.95219e+06	8.05886e+06	9.3088e+06	9.02808e+06	1.6874e+07	8.16013e+06	1.24203e+07	2.29781e+07	1.31791e+07	2.33415e+07	2.27105e+07	2.90236e+07	2.91866e+07	1.75609e+07	4.60359e+07	2.69833e+07	2.62257e+07	3.37309e+07	3.91915e+07	2.38382e+07
B300043	NEG	4.672	225.067	C13 H10 N2 O2	1-methyl-beta-carboline-3-carboxylic acid	-1.37333	97.7514	level1	BMDB										7.61888e+07	6.90124e+07	7.74706e+07	8.96075e+07	6.71322e+07	8.91837e+07	9.68109e+07	9.12617e+07	9.24327e+07	6.31823e+07	6.97877e+07	8.33531e+07	8.91656e+07	8.66318e+07	6.25392e+07	8.25365e+07	6.74417e+07	9.08661e+07	6.829e+07	9.4828e+07	1.92179e+06	1.09605e+06	479616	1.36963e+06	426471	3.26455e+06	3.31601e+06	3.37354e+06	1.15801e+06	626168	3.31325e+06
B300046	NEG	3.11	239.997	C9 H7 N O5 S	Indole-3-carboxilic acid-O-sulphate	-0.985543	90.8581	level1	BMDB		HMDB0060002	Organoheterocyclic compounds	Indolecarboxylic acids and derivatives	Indoles and derivatives	Indole and derivatives				31965.2	22533.5	34523.9	25988	7949.98	13042.8	15682.3	11401.7	27390.3	16975.2	26129.8	15933.6	17134.2	6530.97	42433.8	102054	143438	134038	182056	93803.8	44691.6	30623.2	40745.5	31775.9	51665.5	28515.8	12895.6	26069.3	22249.5	23938.3	327290
B300048	NEG	9.927	241.217	C15 H30 O2	Pentadecanoic acid	-1.35376	94.7034	level1	BMDB	C16537	HMDB0000826	Lipids and lipid-like molecules	Fatty acids and conjugates	Fatty Acyls	Fatty acyls[FA]				1.46202e+07	1.69728e+07	1.6018e+07	1.43384e+07	1.79131e+07	1.47707e+07	1.6595e+07	1.51135e+07	1.17677e+07	1.54351e+07	1.80512e+07	1.36315e+07	1.64044e+07	1.48096e+07	1.83132e+07	1.18188e+07	2.59035e+07	1.21191e+07	7.25895e+06	1.64254e+07	8.34156e+06	9.89486e+06	7.07933e+06	3.95916e+06	5.66492e+06	4.55196e+06	5.31935e+06	3.99715e+06	1.06189e+07	1.02649e+07	9.3833e+06
B300049	POS	7.367	245.175	C13 H24 O4	1,11-Undecanedicarboxylic acid	0.457244	88.9127	level1	BMDB		HMDB0002327	Lipids and lipid-like molecules	Fatty acids and conjugates	Fatty Acyls	Fatty acyls[FA]				1.95688e+07	2.02502e+07	1.85835e+07	1.78812e+07	1.18921e+07	1.01024e+07	9.97971e+06	1.23993e+07	1.75969e+07	1.41447e+07	1.81531e+07	1.56014e+07	1.81006e+07	1.66276e+07	1.72715e+07	1.75654e+07	9.11113e+06	1.9676e+07	2.34256e+07	1.63526e+07	1.71821e+06	1.33628e+06	1.38301e+06	1.34732e+06	1.44315e+06	1.15881e+06	1.21605e+06	1.31148e+06	2.22473e+06	1.53638e+06	7.03151e+06
B300050	NEG	8.475	243.196	C14 H28 O3	2-Hydroxymyristic acid	-1.91257	93.5805	level1	BMDB	C13790	HMDB0002261	Lipids and lipid-like molecules	Fatty acids and conjugates	Fatty Acyls	Fatty acyls[FA]				520741	229898	507812	265130	397867	366363	394587	225792	221636	257271	637795	252150	218513	338222	279888	180776	277358	171840	195256	206442	1.3481e+06	996062	2.37192e+06	560930	1.08798e+06	1.47873e+06	2.54756e+06	1.09487e+06	4.05327e+06	3.19759e+06	832364
B300051	POS	2.769	246.145	C10 H19 N3 O4	Valylglutamine	0.629278	89.7677	level1	BMDB		HMDB0029125	Organic acids and derivatives	Amino acids, peptides, and analogues	Carboxylic acids and derivatives	Amino acids, peptides, and analogues				1.00339e+07	7.36452e+06	7.63271e+06	8.80094e+06	5.19461e+06	7.40894e+06	7.11804e+06	8.20853e+06	6.4353e+06	6.62337e+06	5.98104e+06	7.74605e+06	7.87387e+06	6.85652e+06	6.60145e+06	9.66331e+06	1.25074e+07	1.02487e+07	1.34061e+07	9.37279e+06	1.9e+06	366136	7.85822e+06	5.27386e+06	4.3134e+06	5.53731e+06	562544	1.39533e+07	1.5113e+06	2.34315e+06	1.73922e+06
B300052	NEG	1.513	245.012	C9 H10 O6 S	3-[4-(sulfooxy)phenyl]propanoic acid	-1.85008	90.7484	level1	BMDB		HMDB0125171	Organic acids and derivatives	Arylsulfates	Organic sulfuric acids and derivatives	Organic acids				176895	155538	145223	172859	107339	155348	139733	128522	154418	174577	89244.4	129955	122926	140806	70872.9	277813	95517.8	233005	344637	170541	14661.7	106158	528827	150974	158101	114104	135895	1.08632e+06	13066.5	32718	44308.6
B300053	NEG	9.373	249.186	C16 H26 O2	5E,8E,11E-hexadecatrienoic acid	-1.75321	92.0385	level1	BMDB		HMDB0340898								462603	357791	590073	286988	497099	380220	246673	247758	401203	628686	518654	284936	287971	800525	435854	698370	673659	376983	350404	411611	997532	419585	681187	417443	1.07066e+06	444560	992093	1.64025e+06	3.70873e+06	1.55936e+06	1.01254e+06
B300054	NEG	2.377	251.078	C10 H12 N4 O4	Deoxyinosine	-1.73741	96.2594	level1	BMDB	C05512	HMDB0000071	Nucleosides, nucleotides, and analogues	Purine 2'-deoxyribonucleosides	Purine nucleosides	Purines and derivatives	Nucleotide metabolism	Purine metabolism	map00230 Purine metabolism; map01100 Metabolic pathways; map01232 Nucleotide metabolism; map02010 ABC transporters	1.02816e+08	8.16592e+07	8.43971e+07	8.29151e+07	9.04982e+07	8.20697e+07	8.29225e+07	6.65881e+07	7.14256e+07	1.06978e+08	8.97745e+07	8.70248e+07	6.74639e+07	9.48463e+07	6.31367e+07	6.82396e+07	9.14229e+07	6.96843e+07	8.19339e+07	6.92658e+07	8.33127e+07	6.86382e+07	7.94472e+07	5.02487e+07	1.14235e+08	6.59662e+07	6.32864e+07	1.06986e+08	4.91388e+07	1.01105e+08	6.09368e+07
B300055	NEG	3.246	253.119	C12 H18 N2 O4	Pyrraline	-1.68507	95.2469	level1	BMDB		HMDB0033143	Organic acids and derivatives	Amino acids, peptides, and analogues	Carboxylic acids and derivatives	Amino acids, peptides, and analogues				80349.6	80403.7	160304	103135	102972	363937	232703	435113	380872	96401.9	81865.7	477634	64226.5	76820.5	69986	473586	474308	89016.8	373989	1.14594e+06	912892	1.04517e+06	1.41396e+06	833195	1.22788e+06	745742	554162	1.07936e+06	296570	440398	1.06499e+06
B300056	NEG	2.466	257.078	C10 H14 N2 O6	Ribothymidine	-1.4565	89.5311	level1	BMDB		HMDB0000884	Nucleosides, nucleotides, and analogues		Pyrimidine nucleosides	Nucleic acids and analogues				5.1715e+06	5.19068e+06	3.17489e+06	3.68265e+06	4.56958e+06	3.03413e+06	2.28621e+06	2.48003e+06	2.76176e+06	3.27387e+06	5.23415e+06	4.29801e+06	2.5359e+06	4.41162e+06	4.30429e+06	2.691e+06	5.17889e+06	3.33748e+06	2.03855e+06	1.20688e+06	2.00708e+06	2.0008e+06	1.49584e+06	1.79694e+06	1.34684e+06	4.72139e+06	1.77537e+06	3.81195e+06	3.72837e+06	7.69553e+06	948743
B300057	POS	3.705	261.145	C11 H20 N2 O5	gamma-Glutamylleucine	0.115329	95.1368	level1	BMDB		HMDB0011171	Organic acids and derivatives	Amino acids, peptides, and analogues	Carboxylic acids and derivatives	Amino acids, peptides, and analogues				3.28525e+07	3.08128e+07	2.14635e+07	2.08501e+07	2.1586e+07	2.35008e+07	2.56624e+07	2.292e+07	2.65424e+07	2.7243e+07	2.85061e+07	3.272e+07	2.10684e+07	3.09269e+07	2.45601e+07	4.52096e+07	1.71166e+07	3.26802e+07	3.15583e+07	2.6049e+07	2.48128e+07	1.63334e+07	1.72236e+07	1.111e+07	4.73467e+07	1.54121e+07	1.12264e+07	8.03972e+06	9.41613e+06	1.34664e+07	8.65361e+06
B300058	POS	0.794	260.197	C12 H25 N3 O3	Lysylleucine	-1.27001	89.253	level1	BMDB		HMDB0028955	Organic acids and derivatives	Amino acids, peptides, and analogues	Carboxylic acids and derivatives	Amino acids, peptides, and analogues				2.19617e+06	729018	310128	805155	381839	2.07546e+06	585690	805775	1.29653e+06	904020	1.02208e+06	1.14095e+06	417314	674136	933467	598514	4.07909e+06	711190	1.45151e+06	692985	7.14222e+06	1.07388e+06	5.9835e+06	4.75877e+06	6.31455e+06	4.25895e+06	2.62377e+06	9.31128e+06	1.74974e+06	543000	3.32814e+06
B300060	POS	3.48	267.134	C13 H18 N2 O4	Threonylphenylalanine	0.726905	83.7971	level1	BMDB		HMDB0029068	Organic acids and derivatives	Amino acids, peptides, and analogues	Carboxylic acids and derivatives	Amino acids, peptides, and analogues				2.12515e+06	1.51658e+07	2.39872e+06	2.03998e+07	1.59306e+07	1.90179e+07	2.55679e+06	1.6757e+07	2.48168e+07	8.84954e+06	1.1915e+07	9.71978e+06	1.45353e+07	1.52513e+07	6.62666e+06	1.39807e+06	9.03396e+06	1.08556e+07	1.64853e+07	1.12405e+07	2.83989e+06	121601	3.89879e+06	2.45897e+06	3.15896e+06	3.85396e+06	116463	4.81226e+06	140512	152981	2.91773e+06
B300061	NEG	5.814	267.123	C14 H20 O5	3-carboxy-4-methyl-5-pentyl-2-furanpropanoic acid	-1.77315	77.6052	level1	BMDB		HMDB0061643	Lipids and lipid-like molecules	Fatty acids and conjugates	Fatty Acyls	Fatty acyls[FA]				29651.8	28430.4	52772.4	81048.8	62591.4	101339	117206	230157	112208	54804.7	30699.4	87771.9	143539	55042.2	69919.9	53532.9	129911	41165.5	58318.3	90802.1	5895.83	16089.3	4732.9	20557.1	9926.64	7625.46	19364.2	4566.46	13859.2	6046.61	44391.9
B300062	NEG	5.531	269.045	C15 H10 O5	Galangin	-1.74857	84.4557	level1	BMDB										26285.6	41786.6	98071.2	19117.6	7203.26	64561.9	41952.5	29259.7	35806.7	49534.9	40574.4	18117.1	18817.6	16160.4	170157	33686.7	20395.6	12898.6	13210.7	10888.5	28425.1	30917.7	40634.9	82537	45571.1	38534.4	35751.9	36161.9	41464.8	30145.9	50761
B300063	NEG	10.513	269.248	C17 H34 O2	Methyl palmitate	-1.98275	87.8741	level1	BMDB	C16995		FA Fatty acyls	FA0710 Short fatty esters	FA07 Fatty esters	Fatty acyls[FA]				104762	1.14994e+06	215434	517494	431555	96737.9	122639	210086	95938.6	80707.5	353742	177591	170049	104319	297664	265598	399484	1.565e+06	115203	442798	178841	155478	116358	135661	67785.3	85127	208679	110624	1.78082e+06	2.14915e+06	179405
B300064	NEG	10.423	269.248	C17 H34 O2	15-Methylhexadecanoic acid	-1.9755	89.1208	level1	BMDB		HMDB0061709	Lipids and lipid-like molecules	Fatty acids and conjugates	Fatty Acyls	Fatty acyls[FA]				840524	1.42197e+06	1.58548e+06	2.40001e+06	1.85968e+06	613458	755030	956237	659175	646818	1.57575e+06	1.12068e+06	1.15054e+06	678098	2.53497e+06	1.0411e+06	2.02153e+06	1.90554e+06	615875	1.93568e+06	803426	885671	368480	511874	254141	342780	697792	255085	3.6114e+06	2.56683e+06	716809
B300065	NEG	6.281	271.061	C15 H12 O5	Naringenin	-1.71643	97.9058	level1	BMDB	C00509	HMDB0002670	Phenylpropanoids and polyketides	Flavans	Flavonoids	Flavonoids	Biosynthesis of other secondary metabolites	Flavonoid biosynthesis	map00941 Flavonoid biosynthesis; map00943 Isoflavonoid biosynthesis; map00946 Degradation of flavonoids; map01061 Biosynthesis of phenylpropanoids; map01100 Metabolic pathways; map01110 Biosynthesis of secondary metabolites	46550.9	67329.1	52930.9	81595.9	49282.3	58321.1	69030.8	67291.9	81977.7	32782.2	82681.8	57827.1	75082.6	42128.7	63831.8	56199.9	55899.6	46549.3	69518	125771	98079.1	45435	91736.7	144123	66929.9	53208.8	46649.7	83656	230766	110401	166576
B300066	NEG	9.572	271.227	C16 H32 O3	(R)-3-Hydroxy-hexadecanoic acid	-1.84723	96.7096	level1	BMDB		HMDB0010734	Lipids and lipid-like molecules	Fatty acids and conjugates	Fatty Acyls	Fatty acyls[FA]				8.26451e+06	8.07654e+06	6.99381e+06	1.13727e+07	1.05263e+07	4.27227e+06	7.22681e+06	6.03634e+06	5.16236e+06	6.72675e+06	7.62014e+06	5.54968e+06	8.55592e+06	4.99274e+06	6.33245e+06	6.30725e+06	5.16284e+06	6.95513e+06	4.61e+06	7.13512e+06	1.61001e+07	1.4415e+07	6.78087e+06	1.19529e+07	5.51393e+06	7.75842e+06	1.50831e+07	4.07588e+06	1.81123e+08	1.88984e+08	1.31187e+07
B300075	POS	2.036	276.108	C11 H19 N O8	N-Acetylmuramate	0.243235	93.614	level1	BMDB	C02713	HMDB0060493	Organic oxygen compounds	Carbohydrates and carbohydrate conjugates	Organooxygen compounds	Carbohydrates	Carbohydrate metabolism	Amino sugar and nucleotide sugar metabolism	map00520 Amino sugar and nucleotide sugar metabolism; map01100 Metabolic pathways; map01250 Biosynthesis of nucleotide sugars; map02060 Phosphotransferase system (PTS)	8.31789e+07	7.67635e+07	8.82832e+07	7.83662e+07	1.63713e+08	8.93502e+07	8.79196e+07	6.53922e+07	8.09374e+07	7.25352e+07	1.40505e+08	1.32488e+08	1.08949e+08	1.34129e+08	1.05897e+08	6.75226e+07	1.11143e+08	7.41096e+07	7.16579e+07	7.01778e+07	1.07514e+08	7.52782e+07	4.85402e+07	5.85805e+07	5.72467e+07	7.66813e+07	8.52953e+07	7.80603e+07	1.76662e+08	1.57705e+08	1.03847e+08
B300076	NEG	8.828	293.212	C18 H30 O3	9-HOTrE	-1.49693	96.6618	level1	BMDB	C16326	HMDB0247705	Lipids and lipid-like molecules	Lineolic acids and derivatives	Fatty Acyls	Fatty acyls[FA]	Lipid metabolism	alpha-Linolenic acid metabolism	map00592 alpha-Linolenic acid metabolism	2.07485e+06	1.19028e+06	1.32229e+06	867295	1.42773e+06	1.42856e+06	1.49726e+06	887909	689799	1.64783e+06	1.97949e+06	1.10012e+06	712029	2.73955e+06	1.99216e+06	1.06381e+06	851002	783240	561616	763143	2.10526e+06	4.05395e+06	1.84181e+06	868774	2.88249e+06	4.88411e+06	1.23896e+07	1.38318e+07	1.43278e+07	2.55481e+07	759992
B300078	NEG	10.734	295.264	C19 H36 O2	10-methyl-9Z-octadecenoic acid	-1.47326	90.0825	level1	BMDB										414697	371223	832098	749924	1.50267e+06	421575	580105	540821	373002	255609	1.33745e+06	444178	935579	539045	1.21544e+06	305299	945044	973929	363613	799009	807178	1.21357e+06	172779	331619	114791	420892	1.1446e+06	206523	5.23053e+06	5.18627e+06	1.65865e+06
B300079	NEG	6.377	297.113	C18 H18 O4	Enterolactone	-1.17633	98.4886	level1	BMDB	C18165	HMDB0006101	Lignans, neolignans and related compounds	Tetrahydrofuran lignans	Furanoid lignans	Lignans and related compounds				3.63554e+07	3.61359e+07	2.9557e+07	1.5294e+07	3.0135e+07	4.80228e+07	4.15077e+07	4.21083e+07	4.12487e+07	5.16351e+07	3.48825e+07	4.72827e+07	5.70217e+07	5.02656e+07	5.05708e+07	5.46207e+07	5.46695e+07	4.68875e+07	5.43755e+07	6.04854e+07	2.0649e+07	1.14334e+07	6.78071e+06	2.50602e+07	1.79639e+07	3.35164e+07	2.79706e+07	1.85076e+07	1.69058e+07	1.18287e+07	1.1565e+08
B300080	NEG	9.22	297.243	C18 H34 O3	(9Z)-3-Hydroxy-9-octadecenoic acid	-1.24326	89.0628	level1	BMDB										7.90226e+06	6.92491e+06	8.05962e+06	5.36927e+06	2.42084e+07	8.41145e+06	1.36267e+07	6.47057e+06	5.72419e+06	6.9686e+06	7.09122e+06	6.49418e+06	7.05406e+06	2.29884e+07	5.82506e+06	4.14041e+06	6.80258e+06	4.87215e+06	5.43123e+06	5.89304e+06	1.25748e+07	6.55093e+06	5.51111e+06	4.94952e+06	7.3619e+06	5.91865e+06	1.32666e+07	1.29589e+07	2.6467e+07	5.54058e+07	6.9007e+06
B300085	NEG	10.202	305.248	C20 H34 O2	5,8,11-Eicosatrienoic acid	-1.29646	97.3281	level1	BMDB		HMDB0010378	Lipids and lipid-like molecules	Fatty acids and conjugates	Fatty Acyls	Fatty acyls[FA]				6.83668e+06	6.1759e+06	1.00425e+07	6.31416e+06	9.37194e+06	6.1748e+06	5.93777e+06	5.94978e+06	5.74317e+06	1.02285e+07	1.27394e+07	1.00117e+07	6.07964e+06	1.29974e+07	8.96657e+06	8.78236e+06	9.6907e+06	7.53796e+06	6.67721e+06	1.03633e+07	2.25764e+07	1.80348e+07	1.64801e+07	1.78305e+07	1.71141e+07	7.22728e+06	3.48262e+07	2.14903e+07	1.47837e+08	1.12117e+08	2.8405e+07
B300090	NEG	10.452	327.29	C20 H40 O3	2-Hydroxyeicosanoic acid	-1.24478	96.9793	level1	BMDB		HMDB0061659	Lipids and lipid-like molecules	Fatty acids and conjugates	Fatty Acyls	Fatty acyls[FA]				14112.8	46439.6	18499.9	26960.3	50919	6845.26	8235.85	22479.4	10778.6	16816.1	18974	14075.1	17809.1	15474.6	24253.3	20130.4	14585.6	13045.5	9084.4	10909.7	17053.2	11612.1	10372	9089.3	9161.97	11804.3	17471.1	14025.9	1.53933e+06	3.8283e+06	29580
B300092	POS	9.417	344.279	C19 H37 N O4	N-Palmitoyl-L-serine	-0.274742	91.29	level1	BMDB										1.11692e+07	1.12327e+07	6.45626e+06	6.40605e+06	6.57164e+06	6.61136e+06	5.8257e+06	3.46366e+06	5.51988e+06	6.97115e+06	5.67168e+06	8.61566e+06	8.59341e+06	7.45015e+06	5.46204e+06	4.61942e+06	5.76709e+06	6.84533e+06	5.51514e+06	4.85929e+06	3.14138e+06	4.05605e+06	2.38813e+06	1.71531e+06	2.52602e+06	2.2455e+06	1.73232e+06	1.66785e+06	4.84023e+06	6.71472e+06	2.51225e+06
B300093	NEG	11.068	355.321	C22 H44 O3	2(R)-hydroxydocosanoic acid	-0.943836	93.2518	level1	BMDB		HMDB0061660	Lipids and lipid-like molecules	Fatty acids and conjugates	Fatty Acyls	Fatty acyls[FA]				188401	235972	190475	190771	330985	139336	192071	155357	197940	174364	207101	140899	218096	161574	213473	171370	194794	207140	175929	176742	177021	170955	176113	133710	120116	139832	186009	153471	3.18412e+06	4.93857e+06	171284
B300097	NEG	9.654	362.237	C18 H37 N O4 S	N-Palmitoyltaurine	-0.870397	98.2023	level1	BMDB		HMDB0240594	Lipids and lipid-like molecules	Fatty amides	Fatty Acyls	Fatty acyls[FA]				4304.73	5627.49	28528	19636.3	13152.7	6193.23	12340.2	31044.3	26076.7	56179.6	2924.23	14604.5	2740.18	22808.1	5234.85	15380.1	19240	27688.8	2504.38	19809.3	61335.9	123288	26822.8	54926.8	58905.2	74996.5	63972.5	91642.3	294848	236407	58691.8
B300098	POS	9.86	370.331	C22 H43 N O3	N-butyroyl-sphingosine (d18:1/4:0)	-0.45185	87.3075	level1	BMDB										722015	567281	816438	643480	1.43362e+06	561083	799936	555112	735696	861471	928898	880915	627345	1.22137e+06	1.12591e+06	662101	1.1409e+06	629705	326802	686586	2.19483e+06	3.48093e+06	1.85955e+06	754942	642089	627466	2.15848e+06	906608	7.14029e+06	6.98588e+06	1.222e+06
B300106	POS	8.323	391.284	C24 H38 O4	6-Ketolithocholic Acid	-0.0316919	96.2508	level1	BMDB										1.05082e+06	968643	677245	915677	1.08467e+06	872526	2.64577e+06	967135	981358	2.255e+06	650681	973832	1.60868e+06	962637	2.67604e+06	2.17765e+06	2.63731e+06	729978	920675	2.8607e+06	863520	2.57126e+06	716923	2.5088e+06	1.17059e+06	978841	2.31588e+06	499155	1.61857e+06	1.95773e+06	2.86014e+06
B300109	NEG	8.135	399.221	C21 H36 O5 S	(3beta,5alpha,20R)-20-Hydroxypregnan-3-yl hydrogen sulfate	-1.06454	85.5318	level1	BMDB										55158.5	11641.9	36898.1	70928.5	11792.8	32863.4	10450.3	12656.4	25227.2	14339.7	20579.2	2610.06	6445.53	8518.14	4458.06	15934.8	524677	23991.9	27212.3	97826.4	8835.15	9711.7	7099.65	4221.39	8704.79	14901.1	33148.3	21746.1	27797.8	12091.7	20582.1
B300110	NEG	7.555	405.264	C24 H38 O5	3,7-Dihydroxy-12-oxocholanoic acid	-1.12663	97.5035	level1	BMDB		HMDB0000400	Lipids and lipid-like molecules	Bile acids, alcohols and derivatives	Steroids and steroid derivatives	Bile acids, alcohols and derivatives				39233.9	51505.6	46195.5	51894.1	60936	50435.8	40867.3	107928	94340.8	32711	133757	73830.8	61695.2	64554.3	179551	51523.7	211729	47532.8	29548.1	71237.1	63196.4	70866	132299	72502.1	80646.8	61137.9	76081.6	214291	79473.1	75144.8	110342
B300112	POS	9.63	438.298	C21 H44 N O6 P	PE(P-16:0/0:0)	0.314417	95.0399	level1	BMDB										1.23924e+07	1.44834e+07	1.81895e+07	1.06899e+07	1.5624e+07	1.34513e+07	2.54473e+07	1.43349e+07	8.99678e+06	1.52568e+07	1.37779e+07	1.25575e+07	1.77041e+07	1.79053e+07	1.67485e+07	1.69919e+07	1.60652e+07	1.47984e+07	6.49157e+06	1.44753e+07	1.09064e+07	1.3198e+07	8.53754e+06	1.08384e+07	9.25001e+06	1.14964e+07	4.3292e+07	2.03144e+07	2.05334e+08	1.09325e+08	6.69887e+06
B300115	POS	9.349	439.357	C30 H48 O3	Oleanolic acid	-39465.3	69.6265	level1	BMDB	C17148	HMDB0002364	Lipids and lipid-like molecules	Triterpenoids	Prenol lipids	Terpenoids				6.31864e+06	5.18097e+06	3.81309e+06	5.05484e+06	1.12961e+07	1.8596e+07	5.9147e+06	1.30543e+07	1.97356e+07	1.53826e+07	7.7125e+06	1.51157e+07	7.7417e+06	6.77832e+06	5.00104e+06	1.36057e+07	7.00538e+06	5.29191e+06	1.26343e+07	1.7833e+07	6.56017e+06	8.66559e+06	5.60911e+07	1.19037e+07	5.90128e+06	1.76362e+07	1.26064e+07	2.68599e+07	4.30424e+06	5.9197e+06	1.5678e+07
B300116	NEG	10.18	462.298	C23 H46 N O6 P	PE(P-18:1/0:0)	-1.46422	97.3968	level1	BMDB										2.76889e+06	3.77825e+06	4.68196e+06	4.86497e+06	7.75976e+06	2.65802e+06	5.70842e+06	3.23527e+06	2.23294e+06	4.64731e+06	4.16426e+06	3.65753e+06	4.78079e+06	3.72308e+06	4.5689e+06	4.13486e+06	5.40109e+06	4.88554e+06	1.16324e+06	6.7255e+06	1.82824e+06	2.02191e+06	852536	3.11503e+06	1.39599e+06	1.34373e+06	6.3608e+06	1.16713e+06	4.23423e+07	1.62114e+07	3.36061e+06
B300117	POS	9.268	471.347	C30 H46 O4	Glycyrrhetinic acid	0.826013	93.8009	level1	BMDB	C02283	HMDB0011628	Lipids and lipid-like molecules	Triterpenoids	Prenol lipids	Terpenoids				311797	213375	471298	216486	312751	518039	317509	673279	583027	257517	1.17078e+07	1.32487e+07	1.35025e+07	6.76653e+06	6.9919e+06	4.50177e+06	786051	1.54261e+07	1.5137e+07	2.34864e+07	110655	63120.5	96487.5	96950.9	102905	46089.3	84527.9	72426.8	48290.4	37010.9	2.36018e+06
B300120	NEG	9.808	509.287	C24 H47 O9 P	PG(18:1/0:0)	-2.00502	91.2355	level1	BMDB										1.6559e+07	1.49715e+07	2.28801e+07	2.79942e+07	2.47631e+07	1.72105e+07	2.09953e+07	1.4479e+07	1.38729e+07	1.73811e+07	1.7365e+07	2.535e+07	2.57507e+07	1.92904e+07	2.92833e+07	1.88003e+07	3.6434e+07	2.62575e+07	1.95752e+07	2.66175e+07	2.524e+07	2.06114e+07	1.85255e+07	1.84864e+07	1.38779e+07	8.34163e+06	1.78499e+07	1.4014e+07	6.63113e+07	3.13716e+07	1.76971e+07
B300121	NEG	10.101	511.303	C24 H49 O9 P	PG(18:0/0:0)	-2.05026	91.4899	level1	BMDB										1.3863e+07	2.15646e+07	1.49878e+07	2.3816e+07	2.58882e+07	8.12592e+06	1.23908e+07	2.11841e+07	9.47919e+06	9.1025e+06	1.76639e+07	8.55943e+06	2.62078e+07	9.69198e+06	1.78005e+07	1.18649e+07	2.77632e+07	1.67331e+07	8.48779e+06	2.19816e+07	5.98943e+06	3.92004e+06	2.89473e+06	5.62341e+06	1.03738e+06	2.41551e+06	5.62971e+06	1.5075e+06	2.16549e+07	1.50172e+07	1.1038e+07
B300122	NEG	10.092	524.298	C24 H48 N O9 P	PS(18:0/0:0)	-2.13012	96.0411	level1	BMDB										108086	200094	177719	268181	566202	88985.4	202896	267699	121339	81974.1	284765	84054.1	249008	120718	329950	119003	314681	171779	75792.4	219891	749005	329202	101055	396725	97431.6	266748	962751	170102	1.32754e+07	8.12634e+06	873356
B300124	NEG	9.234	583.256	C33 H36 N4 O6	Bilirubin	-0.0711727	96.4285	level1	BMDB	C00486	HMDB0000054	Organoheterocyclic compounds	Bilirubins	Tetrapyrroles and derivatives	Bilirubins	Metabolism of cofactors and vitamins	Porphyrin and chlorophyll metabolism	map00860 Porphyrin metabolism; map01100 Metabolic pathways; map01110 Biosynthesis of secondary metabolites; map04976 Bile secretion	1488.71	1687.32	2184.32	1970.39	2577.37	2237.63	4288.4	163871	13145	4514.08	7977.66	1277.08	3772.8	1571.57	31685.1	5362.06	137377	1722.98	1423.02	3799.39	1415.73	1626.95	1377.2	10506.8	1140.36	1470.6	1843.72	1258.05	2798.87	2831.85	24824.6
B300126	NEG	9.511	595.289	C27 H49 O12 P	PI(18:2/0:0)	-0.421412	91.7535	level1	BMDB										63571.1	40902.4	183055	54465.3	81552.7	81159	104020	126007	122410	178303	53115	42958.1	37704.4	65833.2	80103.2	72553.7	170025	99327.7	41512.7	124865	30796	17130.9	47605.2	20147.5	22290.2	61143.2	144813	167436	355107	204656	162493
B300127	POS	7.879	597.365	C33 H48 N4 O6	Stercobilinogen	0.977714	94.2372	level1	BMDB	C05789	HMDB0004157	Organoheterocyclic compounds	Bilirubins	Tetrapyrroles and derivatives	Bilirubins	Metabolism of cofactors and vitamins	Porphyrin and chlorophyll metabolism	map00860 Porphyrin metabolism	309977	761986	979105	903701	3.48607e+06	3.33344e+06	1.29595e+06	1.32899e+07	2.26494e+06	1.76585e+06	2.91228e+06	1.46662e+06	2.66993e+06	1.041e+06	6.23678e+06	1.07783e+06	9.57076e+06	794538	711674	1.51484e+06	132055	134615	152433	160318	101037	144590	194495	104268	287492	287042	316466
B300130	NEG	10.073	599.32	C27 H53 O12 P	LysoPI(18:0/0:0)	-0.591856	97.467	level1	BMDB		HMDB0240261	Lipids and lipid-like molecules	Glycerophosphoinositols	Glycerophospholipids	Glycerophospholipids[GP]				98534.9	127032	257209	267502	352823	68561.6	211089	298153	126367	126934	214034	60617.8	185088	228546	235469	127952	260780	241779	54840.8	215146	280564	142202	104664	184300	35499.4	178990	1.07975e+06	208638	4.24477e+06	5.51623e+06	568676
B300138	POS	4.431	162.055	C9 H7 N O2	Indole-3-carboxylic acid	1.64151	78.0221	level1	BMDB	C19837	HMDB0003320	Organoheterocyclic compounds	Indolecarboxylic acids and derivatives	Indoles and derivatives	Indole and derivatives				254298	403542	438600	349995	372368	333061	358862	332188	315893	384540	348550	260932	385436	242335	629107	356278	884263	390441	400926	390047	1.07335e+06	643519	1.1651e+06	1.07015e+06	893403	640039	526395	508897	453950	553155	2.51157e+06
B300139	POS	4.019	180.066	C9 H9 N O3	4-Acetamidobenzoic acid	1.65205	92.4952	level1	BMDB	D03836	HMDB0246328	Benzenoids	Benzoic acids and derivatives	Benzene and substituted derivatives	Benzene and derivatives				1.18309e+06	1.21538e+06	3.07541e+06	1.34973e+06	1.67106e+06	532723	948242	1.01774e+06	388660	1.15663e+06	2.041e+06	1.12159e+06	922993	1.39034e+06	654180	1.85722e+06	2.05402e+06	1.10999e+06	5.16536e+06	790568	2.21768e+06	1.63875e+06	1.16545e+06	1.94617e+06	3.3478e+06	3.5066e+06	1.21239e+06	947047	791763	2.85118e+06	916448
B300142	NEG	11.165	335.295	C22 H40 O2	Docosadienoate (22:2n6)	-1.06225	93.7351	level1	BMDB	C16533	HMDB0061714	Lipids and lipid-like molecules	Fatty acids and conjugates	Fatty Acyls	Fatty acyls[FA]	Lipid metabolism	Biosynthesis of unsaturated fatty acids	map01040 Biosynthesis of unsaturated fatty acids	5231.14	31801.7	23361.5	45557.3	88955.7	4168.72	14764.3	18555.7	17987.3	5283.82	73351.6	8351.49	46236.9	15848.3	60323.6	12852.4	65482.6	70385.2	26121.8	103017	40519	87032.8	6375.18	48178.9	2827.94	13199.1	42552.9	6169.14	2.33489e+06	2.15666e+06	70189
B300143	NEG	5.052	343.085	C15 H20 O7 S	gamma-CEHC sulfate	-0.853351	94.8985	level1	BMDB										18930.7	6668.77	23239.3	17081.1	17827.5	23207.4	23434.1	60161.3	19675.9	32757.6	15703.1	21204.6	32573.1	18905.1	13293.7	49854.8	8396.6	22230.7	51444.4	20074.8	7941.11	24666.4	19055.3	79261.6	74060.5	9647.04	5691.23	161581	6779.07	6347.65	93359.8
B300144	NEG	9.722	483.272	C22 H45 O9 P	PG(16:0/0:0)	-1.49493	96.8286	level1	BMDB										3.69564e+07	3.49772e+07	4.49888e+07	4.51277e+07	5.63343e+07	4.26788e+07	5.60113e+07	4.64084e+07	3.56597e+07	4.20967e+07	3.8156e+07	5.64834e+07	4.91674e+07	4.70116e+07	4.97177e+07	4.11573e+07	6.97164e+07	4.04898e+07	3.36693e+07	4.30846e+07	1.0736e+08	5.65987e+07	5.82553e+07	4.59674e+07	5.55224e+07	5.54223e+07	8.4126e+07	7.09799e+07	2.14287e+08	1.7001e+08	3.0901e+07
B300145	NEG	9.703	496.267	C22 H44 N O9 P	PS(16:0/0:0)	-1.81161	95.4345	level1	BMDB										361350	316318	599210	311191	432475	346046	1.14391e+06	435008	258925	351445	329714	216642	344737	345565	493053	297340	577849	360642	221645	200501	1.01133e+06	775455	601143	340389	442237	392363	785186	577491	6.43148e+06	3.38784e+06	522515
B300149	POS	2.604	144.048	C6 H9 N O S	5-(2-Hydroxyethyl)-4-methylthiazole	1.87198	86.8665	level1	BMDB	C04294		Alkaloids	Thiazole alkaloids	Alkaloids derived from tyrosine	Alkaloids	Metabolism of cofactors and vitamins	Thiamine metabolism	map00730 Thiamine metabolism; map01100 Metabolic pathways; map01240 Biosynthesis of cofactors	3.24921e+07	3.12774e+07	3.55487e+07	3.01022e+07	1.8778e+07	1.05246e+07	1.43613e+07	1.26121e+07	1.3907e+07	1.99803e+07	1.53496e+07	1.96431e+07	1.32599e+07	1.31928e+07	3.05186e+07	1.49002e+07	1.57898e+07	2.83623e+07	2.81904e+07	1.39531e+07	2.32213e+07	1.59561e+07	3.49007e+07	2.47303e+07	2.22332e+07	2.06202e+07	8.22512e+06	1.04801e+07	2.59385e+07	1.86996e+07	1.4311e+07
B300151	POS	0.727	160.133	C8 H17 N O2	Trimethyl-5-aminovaleric acid	0.504401	94.1794	level1	BMDB										2.43267e+08	2.05848e+08	3.32655e+08	3.42724e+08	2.88851e+08	2.72856e+08	3.57097e+08	2.30441e+08	3.84419e+08	2.20605e+08	3.91916e+08	4.18932e+08	4.1574e+08	3.54127e+08	2.52524e+08	3.20272e+08	2.96548e+08	3.87233e+08	2.69989e+08	3.30579e+08	5.936e+08	4.76619e+08	5.39895e+08	3.55005e+08	5.03498e+08	2.92976e+08	4.26723e+08	1.96732e+08	7.03647e+08	6.28947e+08	4.01567e+08
B300153	POS	1.053	166.073	C6 H7 N5 O	7-Methylguanine	1.83341	93.398	level1	BMDB	C02242	HMDB0000897	Organoheterocyclic compounds	Purines and purine derivatives	Imidazopyrimidines	Purines and derivatives				2.06152e+07	1.88725e+07	1.70394e+07	1.71621e+07	1.4624e+07	1.43355e+07	1.42137e+07	1.29785e+07	1.39874e+07	2.00714e+07	1.57911e+07	1.77647e+07	1.22504e+07	1.78119e+07	1.12087e+07	1.49093e+07	1.58217e+07	1.241e+07	2.02349e+07	1.10439e+07	1.7746e+07	1.3784e+07	3.08583e+07	8.19655e+06	1.98388e+07	1.46524e+07	1.12831e+07	1.47047e+07	1.51249e+07	2.17895e+07	7.57035e+06
B300157	POS	0.626	188.176	C9 H21 N3 O	N8-Acetylspermidine	0.71364	91.5667	level1	BMDB	C01029	HMDB0002189	Organic acids and derivatives	Carboximidic acids	Carboximidic acids and derivatives	Organic acids				2.13189e+08	2.00336e+08	1.68339e+08	1.43003e+08	1.71748e+08	2.66333e+08	2.00228e+08	1.52493e+08	1.72854e+08	1.20076e+08	1.83487e+08	2.63249e+08	2.37381e+08	2.23867e+08	2.4125e+08	1.72267e+08	2.99991e+08	1.43641e+08	2.83776e+08	1.47688e+08	1.60059e+08	2.00187e+08	1.70646e+08	2.66781e+08	1.3557e+08	2.08914e+08	1.34254e+08	6.80944e+07	1.50634e+08	5.1855e+07	3.00477e+08
B300158	POS	2.909	189.124	C8 H16 N2 O3	Glycyl-Isoleucine	2.14272	92.0043	level1	BMDB		HMDB0028844	Organic acids and derivatives	Amino acids, peptides, and analogues	Carboxylic acids and derivatives	Amino acids, peptides, and analogues				1.16696e+07	8.75338e+06	4.85017e+06	1.19294e+07	2.78529e+06	6.96473e+06	6.7052e+06	5.2928e+06	6.51132e+06	6.14217e+06	6.0757e+06	5.08763e+06	3.84556e+06	4.96122e+06	3.72038e+06	9.54919e+06	5.78545e+06	5.69052e+06	6.23029e+06	6.33736e+06	8.25454e+06	5.81024e+06	1.29774e+07	1.06909e+07	1.5286e+07	2.93099e+07	1.25816e+07	5.27348e+07	1.06386e+07	9.79025e+06	5.45962e+06
B300159	POS	2.786	203.139	C9 H18 N2 O3	Alanylleucine	2.14423	92.6451	level1	BMDB		HMDB0028691	Organic acids and derivatives	Amino acids, peptides, and analogues	Carboxylic acids and derivatives	Amino acids, peptides, and analogues				3.43434e+06	1.22061e+06	801739	2.5244e+06	452420	1.0425e+06	742861	1.1705e+06	741323	887446	696942	640392	1.17579e+06	516555	915229	1.13214e+06	452727	895167	625008	2.00681e+06	7.53148e+06	6.42642e+06	1.67477e+07	1.65273e+07	1.45225e+07	1.09536e+07	1.93435e+06	8.50298e+06	1.99998e+06	1.86469e+06	3.56602e+06
B300161	POS	1.32	217.119	C9 H16 N2 O4	N2,N5-Diacetylornithine	1.08843	89.5736	level1	BMDB		HMDB0240345	Organic acids and derivatives	Amino acids, peptides, and analogues	Carboxylic acids and derivatives	Amino acids, peptides, and analogues				1.45053e+07	1.47894e+07	9.23363e+06	1.12518e+07	6.42409e+06	2.38517e+07	1.41196e+07	1.27001e+07	1.59654e+07	1.71362e+07	7.37394e+06	9.07411e+06	7.69259e+06	9.17821e+06	8.1175e+06	1.96477e+07	6.40093e+06	1.55837e+07	2.5114e+07	1.76116e+07	1.0479e+07	9.74696e+06	3.76259e+07	3.45817e+07	2.85491e+07	2.58659e+07	1.3781e+07	9.12582e+07	9.23523e+06	1.1715e+07	1.23644e+07
B300162	POS	0.759	217.118	C8 H16 N4 O3	N-a-Acetyl-L-arginine	-52.1028	65.508	level1	BMDB	C01690	HMDB0004620	Organic acids and derivatives	Amino acids, peptides, and analogues	Carboxylic acids and derivatives	Amino acids, peptides, and analogues				1.16192e+07	1.68049e+07	1.38087e+07	6.69372e+06	2.00199e+07	1.71602e+07	5.76419e+06	1.127e+07	1.10573e+07	9.78696e+06	5.50619e+06	9.36217e+06	3.32502e+07	7.26418e+06	2.81156e+07	5.33784e+07	1.55201e+07	3.56647e+06	1.29403e+07	5.0118e+06	5.9768e+06	2.77383e+07	8.43036e+07	3.79345e+07	1.63398e+07	3.2955e+07	9.51025e+06	5.96622e+07	3.53568e+07	1.11736e+07	4.65825e+07
B300163	POS	2.713	219.134	C9 H18 N2 O4	Xanoic acid	1.2816	91.1736	level1	BMDB										4.99405e+06	4.43823e+06	3.47103e+06	3.5415e+06	724354	2.0785e+06	1.67976e+06	1.28572e+06	1.42234e+06	1.19381e+06	925412	491771	680455	1.32991e+06	1.10408e+06	4.24206e+06	721026	3.06993e+06	1.40686e+06	1.8055e+06	5.26245e+06	4.90059e+06	1.21915e+07	1.07483e+07	1.56144e+07	6.21834e+06	5.1696e+06	1.60889e+07	1.67916e+06	1.90362e+06	2.45514e+06
B300164	POS	0.74	230.186	C11 H23 N3 O2	N1,N8-Diacetylspermidine	-0.35754	90.9324	level1	BMDB		HMDB0041947	Organic acids and derivatives	Carboxylic acid derivatives	Carboxylic acids and derivatives	Organic acids				2.73201e+07	2.90045e+07	2.78546e+07	2.83436e+07	6.80329e+07	2.81636e+07	3.14452e+07	2.48319e+07	2.78321e+07	2.10714e+07	2.7725e+07	2.94598e+07	7.11052e+07	2.8277e+07	5.01603e+07	2.1252e+07	3.1917e+07	2.96285e+07	3.47776e+07	2.37257e+07	5.37811e+07	3.11162e+07	2.62005e+07	4.62324e+07	3.78149e+07	4.83515e+07	6.26203e+07	4.16225e+07	1.22293e+08	6.34391e+07	1.31732e+08
B300165	POS	6.654	250.144	C14 H19 N O3	N-pentanoyl-L-phenylalanine	0.482092	94.6443	level1	BMDB										6.91466e+06	5.97214e+06	3.25955e+06	2.41381e+06	3.10006e+06	5.34994e+06	4.92099e+06	4.71469e+06	5.33089e+06	6.80201e+06	2.28232e+06	4.84782e+06	2.22564e+06	4.66556e+06	3.05297e+06	4.05117e+06	2.56851e+06	2.90851e+06	6.47359e+06	3.21211e+06	9.47119e+06	1.35448e+07	1.67196e+07	8.86821e+06	1.81662e+07	2.32523e+07	9.72007e+06	6.0885e+06	4.54949e+06	4.5814e+06	5.90385e+06
B300166	POS	8.757	272.258	C16 H33 N O2	Hexadecasphingosine (d16:1)	0.204596	90.6514	level1	BMDB		HMDB0242181	Organic nitrogen compounds	Amines	Organonitrogen compounds	Amines				3.54539e+06	4.49014e+06	5.17827e+06	5.23545e+06	5.52391e+06	3.55628e+06	6.25174e+06	5.80012e+06	5.64011e+06	4.32986e+06	5.78376e+06	4.45002e+06	4.04068e+06	4.37735e+06	1.40885e+07	4.84472e+06	7.76136e+06	2.45906e+06	4.03409e+06	3.30624e+06	4.56034e+06	1.90046e+06	1.38789e+06	2.65487e+06	2.09343e+06	3.11855e+06	5.1219e+06	2.87205e+06	9.28524e+06	5.16689e+06	4.83905e+06
B300168	POS	2.66	279.101	C10 H18 N2 O5 S	gamma-Glutamylmethionine	0.552362	92.3362	level1	BMDB		HMDB0034367	Organic acids and derivatives	Amino acids, peptides, and analogues	Carboxylic acids and derivatives	Amino acids, peptides, and analogues				1.04162e+07	9.48316e+06	6.25575e+06	7.94694e+06	5.98239e+06	8.93008e+06	8.19917e+06	8.1569e+06	9.1294e+06	7.35511e+06	7.40148e+06	1.01146e+07	5.76045e+06	9.11325e+06	7.02802e+06	1.17345e+07	7.39388e+06	9.6821e+06	9.39228e+06	7.61264e+06	1.39262e+07	1.00002e+07	5.96795e+06	3.50405e+06	2.08e+07	6.39365e+06	5.88849e+06	5.94556e+06	8.08122e+06	4.3137e+06	3.74507e+06
B300174	POS	8.402	300.29	C18 H37 N O2	Sphingosine	-0.125636	96.0774	level1	BMDB	C00319	HMDB0000252	Organic nitrogen compounds	Amines	Organonitrogen compounds	Amines	Lipid metabolism	Sphingolipid metabolism	map00600 Sphingolipid metabolism; map01100 Metabolic pathways; map04071 Sphingolipid signaling pathway; map04210 Apoptosis; map04217 Necroptosis	2.63643e+06	1.95536e+06	1.77208e+06	2.16378e+06	3.88017e+06	1.66749e+06	1.72158e+06	1.7772e+06	1.8318e+06	3.19263e+06	8.28162e+06	2.72154e+06	1.99834e+06	3.78784e+06	3.57721e+06	2.41166e+06	1.56439e+06	1.52048e+06	2.04064e+06	3.77052e+06	5.05188e+06	1.0913e+07	1.35429e+07	1.85359e+07	3.55267e+06	6.17294e+06	1.26293e+07	3.70417e+06	8.03871e+07	5.39373e+07	1.0466e+07
B300175	POS	3.16	304.15	C12 H21 N3 O6	Nicotianamine	0.0534988	71.3396	level1	BMDB	C05324						Amino acid metabolism	Cysteine and methionine metabolism	map00270 Cysteine and methionine metabolism; map00999 Biosynthesis of various plant secondary metabolites; map01100 Metabolic pathways; map01110 Biosynthesis of secondary metabolites	555525	607456	401925	538452	265127	502148	414062	225308	248937	356350	85286.4	305974	384067	332917	214664	195243	222566	338756	602546	321716	1.19533e+06	926653	2.89817e+06	3.05629e+06	2.6272e+06	2.00993e+06	708130	3.41724e+06	401270	273052	864529
B300177	POS	9.917	328.321	C20 H41 N O2	Stearoylethanolamide	-0.278592	95.5538	level1	BMDB		HMDB0013078	Organic nitrogen compounds	Amines	Organonitrogen compounds	Amines				4.63796e+06	1.47537e+07	7.16204e+06	7.89827e+06	1.44582e+07	4.31589e+06	5.10957e+06	9.53112e+06	3.00822e+06	4.27215e+06	2.09822e+07	6.90894e+06	1.14086e+07	1.06643e+07	6.59355e+06	1.29095e+07	1.99257e+07	5.48246e+06	6.96021e+06	3.32723e+07	8.08353e+06	6.74877e+06	5.9664e+06	7.38734e+06	1.49267e+06	6.67885e+06	1.59644e+07	1.44575e+07	3.53575e+07	4.52677e+07	1.44455e+07
B300179	POS	11.484	387.362	C27 H46 O	Cholesterol	-0.0103018	93.9586	level1	BMDB	C00187	HMDB0000067	Lipids and lipid-like molecules	Cholestane steroids	Steroids and steroid derivatives	Steroids and derivatives	Lipid metabolism	Steroid biosynthesis	map00100 Steroid biosynthesis; map00120 Primary bile acid biosynthesis; map00140 Steroid hormone biosynthesis; map00981 Insect hormone biosynthesis; map00984 Steroid degradation; map00996 Biosynthesis of various alkaloids; map01066 Biosynthesis of alkaloids derived from terpenoid and polyketide; map01100 Metabolic pathways; map01120 Microbial metabolism in diverse environments; map04913 Ovarian s…	51432.7	54270.4	49217.3	59123.5	45768.1	37014	46722.8	40846.8	47402.3	41874.4	71091.3	43153.6	59205.5	44598.4	247677	45469.9	57427.7	49517.2	47841.4	108180	54487.2	157284	39114.1	39771.8	37739.7	43581.6	53475.2	40711.1	1.04486e+07	4.91571e+06	145377
B300181	POS	11.155	385.346	C27 H44 O	Cholestenone	-0.041228	94.993	level1	BMDB	C00599	HMDB0000921	Lipids and lipid-like molecules	Cholestane steroids	Steroids and steroid derivatives	Steroids and derivatives	Xenobiotics biodegradation and metabolism	Steroid degradation	map00984 Steroid degradation; map01120 Microbial metabolism in diverse environments	1.69993e+06	3.47308e+06	5.00605e+06	5.81063e+06	1.22642e+07	753236	2.1681e+06	4.25275e+06	1.673e+06	3.75733e+06	9.71323e+06	2.1285e+06	7.6386e+06	2.30718e+06	1.66089e+07	2.59407e+06	4.82968e+06	2.44674e+06	1.60761e+06	1.48171e+07	3.23993e+06	4.55221e+06	1.98169e+06	3.16592e+06	616431	912873	1.58677e+06	661902	2.43164e+08	2.15762e+08	5.87045e+06
B300182	POS	10.923	397.346	C28 H44 O	Ergosterol	0.0233992	89.9243	level1	BMDB	C01694	HMDB0000878	Lipids and lipid-like molecules	Ergostane steroids	Steroids and steroid derivatives	Steroids and derivatives	Lipid metabolism	Steroid biosynthesis	map00100 Steroid biosynthesis; map01100 Metabolic pathways; map01110 Biosynthesis of secondary metabolites	35941.3	33939.2	31765.5	43031.9	126673	26293.6	32016.6	39212.6	31179.9	43850.5	101984	31969.8	101626	28480.5	166631	35847.1	33234.6	37555.9	35070.7	199031	48714.7	60400.2	39508.9	115484	25175.2	32867.3	51559.7	29383.1	863392	733956	60185.2
B300190	POS	12.041	415.394	C29 H50 O	beta-Sitosterol	0.169684	93.9901	level1	BMDB	C01753	HMDB0000852	Lipids and lipid-like molecules	Stigmastanes and derivatives	Steroids and steroid derivatives	Steroids and derivatives	Lipid metabolism	Steroid biosynthesis	map00100 Steroid biosynthesis; map01060 Biosynthesis of plant secondary metabolites; map01062 Biosynthesis of terpenoids and steroids; map01100 Metabolic pathways; map01110 Biosynthesis of secondary metabolites	56426.1	60976.6	55170	64603.1	56835.5	44605.3	54363.6	49292.9	50454.5	47826.2	60425.9	48335.6	55792.4	49424.5	62097.4	52912.5	55945.8	57003	57484.1	49321.3	53778.4	52641.7	50811.6	46285.8	43780.2	51072.3	61327.8	48573.8	733036	136948	43065.7
B300191	POS	9.764	425.341	C29 H44 O2	alpha-Tocotrienol	-0.273506	94.7514	level1	BMDB	C14153	HMDB0006327	Lipids and lipid-like molecules	Quinone and hydroquinone lipids	Prenol lipids	Quinone	Metabolism of cofactors and vitamins	Ubiquinone and other terpenoid-quinone biosynthesis	map00130 Ubiquinone and other terpenoid-quinone biosynthesis; map01100 Metabolic pathways; map01110 Biosynthesis of secondary metabolites	1.27162e+07	1.38059e+07	1.92753e+07	3.43903e+07	2.22403e+07	2.38911e+07	1.71521e+07	2.40948e+07	2.10173e+07	1.8892e+07	3.85319e+07	3.52619e+07	3.33648e+07	2.07327e+07	2.27058e+07	1.43285e+07	3.91957e+07	1.65575e+07	1.06965e+07	3.32796e+07	8.63645e+06	5.20083e+06	6.74438e+06	8.81507e+06	4.40884e+06	4.75118e+06	8.90944e+06	5.95835e+06	2.17912e+06	4.84355e+06	2.32476e+07
B300193	POS	9.695	464.313	C23 H46 N O6 P	LysoPE(P-18:1(9Z)/0:0)	-0.332551	92.0863	level1	BMDB		HMDB0240599	Lipids and lipid-like molecules	Glycerophosphoethanolamines	Glycerophospholipids	Amines and derivatives				1.89614e+07	2.51588e+07	2.82497e+07	2.78473e+07	3.95951e+07	2.08235e+07	3.62635e+07	1.95864e+07	1.74456e+07	2.73929e+07	2.99529e+07	2.24815e+07	2.54462e+07	2.59323e+07	2.61874e+07	2.51962e+07	3.22852e+07	2.60539e+07	9.48638e+06	2.7148e+07	1.59786e+07	8.96622e+06	8.74131e+06	2.10046e+07	1.02202e+07	2.20651e+07	2.20906e+07	9.56315e+06	8.53592e+07	4.11331e+07	1.19303e+07
B300194	POS	9.924	466.329	C23 H48 N O6 P	PE(P-18:0/0:0)	0.574717	95.0683	level1	BMDB										2.9018e+06	5.14369e+06	4.70269e+06	5.58739e+06	6.44952e+06	1.64185e+06	4.32564e+06	4.62263e+06	2.82842e+06	4.07866e+06	5.52635e+06	2.62696e+06	5.42628e+06	4.82913e+06	7.11013e+06	5.09925e+06	4.36767e+06	9.23325e+06	2.25348e+06	9.62004e+06	7.59547e+06	1.09477e+07	3.00438e+06	1.03778e+07	3.10505e+06	6.85187e+06	1.78168e+07	3.11601e+06	2.81343e+08	1.51903e+08	9.84565e+06
B300203	POS	11.943	760.584	C42 H82 N O8 P	PC(16:0/18:1(9Z))	-1.66703	90.8252	level1	BMDB		HMDB0007972	Lipids and lipid-like molecules	Glycerophosphocholines	Glycerophospholipids	Glycerophospholipids[GP]				47417.6	132366	63001	117982	121012	33746.2	62326.8	53775.4	41953.3	54162.4	64328.6	49942.6	68202.8	59110.6	75120.4	59918.4	64225.6	65352.2	57538.3	57513.6	397494	1.78036e+06	58260.9	79266.5	46845.7	56991.6	67695.7	84949.8	6.42184e+08	6.39765e+08	984202
B300208	NEG	3.048	107.05	C7 H8 O	4-Methylphenol	0.493937	90.241	level1	BMDB	C01468	HMDB0001858	Benzenoids	Cresols	Phenols	Phenols and derivatives	Xenobiotics biodegradation and metabolism	Toluene degradation	map00623 Toluene degradation; map00633 Nitrotoluene degradation; map01100 Metabolic pathways; map01120 Microbial metabolism in diverse environments; map01220 Degradation of aromatic compounds; map04974 Protein digestion and absorption	2.90804e+06	3.16032e+06	2.63279e+06	3.82607e+06	2.45564e+06	1.86326e+06	2.1101e+06	2.0564e+06	2.33949e+06	2.22423e+06	2.10339e+06	1.72967e+06	2.25292e+06	2.30753e+06	1.73156e+06	2.30854e+06	1.49457e+06	1.88933e+06	1.96828e+06	1.74746e+06	501114	679863	1.10416e+06	757449	846630	1.12788e+06	688060	730695	587985	565110	1.23184e+06
B300211	NEG	0.745	116.072	C5 H11 N O2	5-Aminovaleric acid	0.444817	90.023	level1	BMDB	C00431	HMDB0003355	Organic acids and derivatives	Amino acids, peptides, and analogues	Carboxylic acids and derivatives	Amino acids, peptides, and analogues	Amino acid metabolism	Lysine degradation	map00310 Lysine degradation; map00330 Arginine and proline metabolism; map00470 D-Amino acid metabolism; map01100 Metabolic pathways; map01120 Microbial metabolism in diverse environments	5.74989e+07	4.04523e+07	3.24764e+07	3.63191e+07	4.10811e+07	3.45181e+07	3.98904e+07	3.52043e+07	3.91798e+07	4.07616e+07	3.22276e+07	3.26789e+07	2.22552e+07	4.2102e+07	4.2118e+07	3.77979e+07	2.39346e+07	3.01756e+07	2.29757e+07	3.03705e+07	8.17036e+07	7.77494e+07	7.41393e+07	6.29288e+07	1.02024e+08	8.87518e+07	7.47339e+07	7.92795e+07	5.92737e+07	3.85026e+07	3.81682e+07
B300213	NEG	0.706	128.035	C5 H7 N O3	4-Oxoproline	0.31806	99.2744	level1	BMDB	C01877	HMDB0304793	Organic acids and derivatives	Amino acids, peptides, and analogues	Carboxylic acids and derivatives	Amino acids, peptides, and analogues				1.75737e+07	2.12109e+07	2.31236e+07	2.44265e+07	2.28557e+07	1.22443e+07	2.45202e+07	1.60088e+07	1.46296e+07	1.57407e+07	2.04829e+07	2.48853e+07	2.10766e+07	2.92026e+07	2.03471e+07	1.29265e+07	1.89707e+07	2.07348e+07	9.34281e+06	1.34673e+07	3.61215e+07	2.35243e+07	1.18252e+07	1.65342e+07	1.84173e+07	2.15308e+07	2.04212e+07	1.52357e+07	3.13584e+07	1.78196e+07	1.54531e+07
B300215	NEG	2.297	131.071	C6 H12 O3	2-Hydroxycaproic acid	-0.333835	98.1854	level1	BMDB		HMDB0001624	Lipids and lipid-like molecules	Fatty acids and conjugates	Fatty Acyls	Fatty acyls[FA]				9.63483e+06	4.15019e+06	6.71918e+06	7.45774e+06	1.99891e+07	1.04304e+07	1.48453e+07	9.10928e+06	9.89579e+06	1.13298e+07	8.51157e+06	2.29773e+07	8.95226e+06	1.80266e+07	8.6211e+06	6.88678e+06	9.41861e+06	5.38802e+06	4.60241e+06	7.63756e+06	1.88107e+07	1.89298e+07	1.87949e+08	2.93122e+07	1.9698e+07	1.89959e+08	2.24446e+08	2.6052e+08	6.28463e+07	8.20302e+07	8.10597e+06
B300227	NEG	1.819	273.072	C9 H12 N2 O5	2'-Deoxyuridine	-1.76837	95.3567	level1	BMDB	C00526	HMDB0000012	Nucleosides, nucleotides, and analogues	Pyrimidine 2'-deoxyribonucleosides	Pyrimidine nucleosides	Nucleic acids and analogues	Nucleotide metabolism	Pyrimidine metabolism	map00240 Pyrimidine metabolism; map01100 Metabolic pathways; map01232 Nucleotide metabolism; map02010 ABC transporters	7.74236e+07	6.3743e+07	7.34151e+07	7.71533e+07	6.98281e+07	5.18331e+07	5.29191e+07	5.57508e+07	4.3833e+07	5.28688e+07	6.83038e+07	6.79552e+07	6.55668e+07	6.61889e+07	6.93413e+07	5.43385e+07	6.80391e+07	6.48374e+07	5.01974e+07	5.4671e+07	5.37227e+07	5.54657e+07	3.57715e+07	2.82103e+07	4.23759e+07	4.09293e+07	3.44815e+07	6.09771e+07	2.61236e+07	3.98597e+07	3.2774e+07
B300236	NEG	8.112	311.222	C18 H32 O4	(+/-)9-HpODE	-1.23237	86.9959	level1	BMDB		HMDB0242602	Lipids and lipid-like molecules	Lineolic acids and derivatives	Fatty Acyls	Fatty acyls[FA]				1.55587e+06	1.39826e+06	1.02534e+06	560902	686005	1.50409e+06	1.74543e+06	1.38187e+06	1.20166e+06	1.32465e+06	1.35001e+06	1.52399e+06	1.16899e+06	3.15788e+06	616611	1.27291e+06	1.12527e+06	845251	1.68198e+06	1.48879e+06	2.12916e+06	3.44624e+06	2.07691e+06	2.43798e+06	4.61427e+06	5.05776e+06	9.56983e+06	1.06149e+07	6.71314e+06	2.73492e+07	2.9424e+06
B300237	NEG	8.139	313.238	C18 H34 O4	(+/-)12(13)-DiHOME	-1.33234	89.5913	level1	BMDB	C14829	HMDB0004705	Lipids and lipid-like molecules	Fatty acids and conjugates	Fatty Acyls	Fatty acyls[FA]	Lipid metabolism	Linoleic acid metabolism	map00591 Linoleic acid metabolism	616074	537667	747343	287455	661830	366468	657445	408131	304936	654473	654419	492315	491843	1.21878e+06	479464	433689	569579	420822	483270	371614	1.0004e+06	589744	749504	811823	1.03139e+06	924030	1.71617e+06	1.24969e+06	2.113e+06	5.14239e+06	1.5736e+06
B300238	NEG	8.915	295.227	C18 H34 O4	(+/-)9,10-dihydroxy-12Z-octadecenoic acid	-57314.9	96.782	level1	BMDB		HMDB0004704	Lipids and lipid-like molecules	Fatty acids and conjugates	Fatty Acyls	Fatty acyls[FA]				8.62444e+06	6.568e+06	6.69412e+06	2.58254e+06	6.72219e+06	3.42219e+06	5.14949e+06	3.93238e+06	3.19914e+06	8.3961e+06	6.74495e+06	3.72556e+06	2.98655e+06	1.00382e+07	7.13981e+06	4.13765e+06	2.58424e+06	3.74347e+06	1.67597e+06	2.51695e+06	3.75897e+06	9.36822e+06	5.87567e+06	2.72345e+06	1.25492e+07	1.27028e+07	2.30852e+07	3.97318e+07	4.3422e+07	5.90711e+07	2.9038e+06
B300242	NEG	1.8	159.066	C7 H12 O4	3,3-Dimethylglutaric acid	-0.531453	95.3671	level1	BMDB		HMDB0002441	Lipids and lipid-like molecules	Fatty acids and conjugates	Fatty Acyls	Fatty acyls[FA]				1.59627e+07	1.38421e+07	1.20952e+07	1.25878e+07	1.23155e+07	2.39059e+07	1.48495e+07	1.61618e+07	2.13118e+07	1.3634e+07	1.31624e+07	1.59731e+07	1.49515e+07	1.73132e+07	1.52664e+07	1.35914e+07	1.18491e+07	1.30413e+07	1.66916e+07	1.32183e+07	6.14878e+06	9.57319e+06	7.9989e+06	5.35688e+06	1.13075e+07	1.61711e+07	1.06926e+07	6.96192e+06	1.20918e+07	2.10311e+07	1.5194e+07
B300246	POS	0.647	104.107	C5 H13 N O	Choline	0.363808	94.1544	level1	BMDB	C00114	HMDB0000097	Organic nitrogen compounds	Quaternary ammonium salts	Organonitrogen compounds	Quaternary ammonium salts	Amino acid metabolism	Glycine, serine and threonine metabolism	map00260 Glycine, serine and threonine metabolism; map00552 Teichoic acid biosynthesis; map00564 Glycerophospholipid metabolism; map01100 Metabolic pathways; map02010 ABC transporters; map04725 Cholinergic synapse; map04976 Bile secretion; map05231 Choline metabolism in cancer	5.91939e+08	5.29808e+08	7.08886e+08	4.96966e+08	4.83462e+08	3.95513e+08	4.51343e+08	4.79042e+08	4.89618e+08	6.09053e+08	3.89942e+08	4.56234e+08	3.64297e+08	4.65912e+08	4.98217e+08	4.14163e+08	4.10249e+08	5.75911e+08	3.8325e+08	3.74634e+08	6.35462e+08	5.50167e+08	5.01814e+08	3.87522e+08	6.30438e+08	5.45188e+08	8.96547e+08	6.55363e+08	1.33034e+09	1.18433e+09	4.36357e+08
B300251	POS	0.747	144.102	C7 H13 N O2	DL-Stachydrine	0.877773	90.101	level1	BMDB	C10172	HMDB0004827	Organic acids and derivatives	Amino acids, peptides, and analogues	Carboxylic acids and derivatives	Amino acids, peptides, and analogues				1.06895e+08	5.94009e+07	5.52094e+07	5.85193e+07	9.7213e+07	1.0356e+08	8.97854e+07	6.16561e+07	5.96085e+07	9.25512e+07	1.00936e+08	9.01788e+07	6.58855e+07	1.01933e+08	5.97539e+07	6.7237e+07	8.47679e+07	9.30285e+07	6.41358e+07	9.50866e+07	1.17411e+07	1.15351e+07	2.88151e+07	1.11574e+07	1.30102e+07	4.91478e+07	6.61616e+07	3.45894e+07	1.92264e+07	4.06546e+07	4.42908e+07
B300253	POS	0.71	162.112	C7 H15 N O3	DL-Carnitine	-0.369554	80.1091	level1	BMDB	C00318	HMDB0000062	Organic nitrogen compounds	Quaternary ammonium salts	Organonitrogen compounds	Quaternary ammonium salts			map04714 Thermogenesis; map04976 Bile secretion; map05415 Diabetic cardiomyopathy	2.31835e+07	1.43991e+07	1.52824e+07	2.56656e+07	1.6531e+07	2.0053e+07	1.73216e+07	1.26193e+07	1.74296e+07	1.25937e+07	2.07403e+07	2.87294e+07	2.1718e+07	3.00209e+07	1.9847e+07	1.50311e+07	2.16187e+07	1.47103e+07	2.0523e+07	2.05053e+07	2.9476e+07	1.68018e+07	1.77472e+07	1.47809e+07	2.3183e+07	1.20237e+07	1.19515e+07	2.30446e+07	1.69444e+07	2.01941e+07	1.13902e+07
B300254	POS	0.686	166.053	C5 H11 N O3 S	L-Methionine sulfoxide	0.340265	93.1347	level1	BMDB	C02989	HMDB0002005	Organic acids and derivatives	Amino acids, peptides, and analogues	Carboxylic acids and derivatives	Amino acids, peptides, and analogues	Amino acid metabolism	Cysteine and methionine metabolism	map00270 Cysteine and methionine metabolism; map01100 Metabolic pathways	8.70739e+07	4.31821e+07	4.38915e+07	2.91316e+07	5.00273e+07	5.21567e+07	5.4255e+07	3.32745e+07	3.75766e+07	3.60006e+07	4.62563e+07	3.59765e+07	2.72973e+07	5.38488e+07	4.33394e+07	4.53941e+07	1.92803e+07	3.22402e+07	2.04091e+07	2.40716e+07	5.92993e+07	1.06681e+08	5.38603e+07	5.53975e+07	1.06299e+08	1.36069e+08	1.11655e+08	1.14713e+08	9.81722e+07	9.45334e+07	3.70103e+07
B300260	POS	4.637	260.186	C13 H25 N O4	Hexanoylcarnitine	0.253668	61.9014	level1	BMDB		HMDB0000756	Lipids and lipid-like molecules	Fatty acid esters	Fatty Acyls	Fatty acyls[FA]				3.52862e+06	3.41403e+06	4.37059e+06	4.54856e+06	4.14491e+06	2.88072e+06	2.89989e+06	3.87741e+06	3.0023e+06	2.87308e+06	3.19029e+06	3.90366e+06	3.77684e+06	3.20765e+06	3.55528e+06	2.98718e+06	3.85754e+06	3.26754e+06	3.4424e+06	2.92252e+06	72587.3	156419	78193.5	59290.3	367790	144769	346595	321759	394329	659659	1.10435e+06
B300264	POS	9.666	326.305	C20 H39 N O2	Oleoyl ethanolamide	-0.59429	91.7689	level1	BMDB	C20792	HMDB0002088	Organic nitrogen compounds	Amines	Organonitrogen compounds	Amines			map04024 cAMP signaling pathway	9.1869e+06	1.70022e+07	1.12673e+07	1.42633e+07	1.70066e+07	1.07596e+07	6.03335e+06	1.1755e+07	3.9389e+06	9.60011e+06	1.98828e+07	1.51037e+07	1.19851e+07	2.33791e+07	6.11554e+06	1.32197e+07	3.09933e+07	6.90919e+06	7.36241e+06	2.64301e+07	3.30216e+07	1.42307e+07	2.91101e+07	1.84688e+07	8.39855e+06	3.04845e+07	4.07867e+07	6.36949e+07	5.65677e+07	4.67521e+07	2.62651e+07
B300272	POS	3.365	223.108	C11 H14 N2 O3	Glycyl-Phenylalanine	1.39421	85.1213	level1	BMDB		HMDB0028848	Organic acids and derivatives	Amino acids, peptides, and analogues	Carboxylic acids and derivatives	Amino acids, peptides, and analogues				3.03128e+06	1.82686e+06	1.95149e+06	3.12376e+06	1.97853e+06	3.26482e+06	2.06288e+06	1.87993e+06	2.47228e+06	1.93247e+06	3.29742e+06	2.12666e+06	1.77727e+06	2.33756e+06	3.09784e+06	2.08762e+06	2.47755e+06	2.5352e+06	1.7266e+06	2.24442e+06	4.30495e+06	3.11073e+06	5.07881e+06	3.17556e+06	4.81443e+06	4.45856e+06	3.03809e+06	1.44317e+07	5.06002e+06	3.15328e+06	1.71565e+06
B300275	POS	6.994	229.144	C12 H20 O4	Traumatic acid	0.839107	84.0275	level1	BMDB	C16308	HMDB0000933	Lipids and lipid-like molecules	Fatty acids and conjugates	Fatty Acyls	Fatty acyls[FA]	Lipid metabolism	alpha-Linolenic acid metabolism	map00592 alpha-Linolenic acid metabolism; map01110 Biosynthesis of secondary metabolites	4.92928e+06	6.71608e+06	3.69952e+06	5.55293e+06	3.57464e+06	3.15343e+06	2.72828e+06	5.17184e+06	4.78686e+06	3.55901e+06	4.79639e+06	3.76043e+06	4.22221e+06	4.68601e+06	4.39412e+06	5.53902e+06	3.90909e+06	5.33388e+06	5.26667e+06	4.86657e+06	2.49682e+06	7.81864e+06	1.30486e+07	2.60283e+06	6.50271e+06	2.45956e+06	1.90218e+06	1.45643e+06	2.25034e+06	2.65482e+06	6.27994e+06
B300277	NEG	6.165	229.144	C12 H22 O4	Dodecanedioic acid	-1.7302	97.8091	level1	BMDB	C02678	HMDB0000623	Lipids and lipid-like molecules	Fatty acids and conjugates	Fatty Acyls	Fatty acyls[FA]				4.80892e+08	4.63255e+08	4.86301e+08	6.53406e+08	4.40136e+08	3.90381e+08	4.43014e+08	4.71869e+08	4.77991e+08	4.45836e+08	4.31329e+08	5.02773e+08	5.19122e+08	4.98002e+08	3.88455e+08	4.40467e+08	3.84081e+08	4.74389e+08	5.04882e+08	4.64693e+08	3.06634e+08	3.15963e+08	3.7232e+08	2.90242e+08	3.35639e+08	2.17729e+08	1.34547e+08	7.62403e+07	1.44539e+08	1.33387e+08	4.83245e+08
B300284	NEG	4.145	245.139	C12 H22 O5	3-Hydroxydodecanedioic acid	-1.72457	94.8835	level1	BMDB		HMDB0000413	Organic acids and derivatives	Medium-chain hydroxy acids and derivatives	Hydroxy acids and derivatives	Organic acids				4.29144e+06	5.58187e+06	3.32209e+06	4.35623e+06	3.14402e+06	5.48592e+06	6.58215e+06	4.75459e+06	4.22286e+06	5.3482e+06	6.09252e+06	4.10615e+06	5.8546e+06	4.96488e+06	4.38273e+06	6.59248e+06	2.32883e+06	8.22995e+06	5.64708e+06	7.0978e+06	5.6523e+06	5.23996e+06	4.57877e+06	6.57551e+06	5.87232e+06	3.86712e+06	2.2583e+06	2.7804e+06	3.33415e+06	2.36558e+06	7.71943e+06
B300286	NEG	9.621	251.201	C16 H28 O2	7Z,10Z-Hexadecadienoic acid	-1.71164	96.6097	level1	BMDB		HMDB0000477	Lipids and lipid-like molecules	Fatty acids and conjugates	Fatty Acyls	Fatty acyls[FA]				490747	348052	556271	342475	518474	209257	415852	235175	260278	380876	431153	383048	218326	715248	338706	448731	733952	319597	338746	322493	479687	335170	785978	308808	828617	393135	723259	653735	1.3544e+06	1.29209e+06	731936
B300291	NEG	6.029	263.128	C15 H20 O4	(-)-Abscisic acid	-2.19692	97.1282	level1	BMDB		HMDB0243505	Lipids and lipid-like molecules	Sesquiterpenoids	Prenol lipids	Terpenoids				114386	131934	123752	159530	126818	276676	129152	172178	172227	110062	126873	135257	172457	119676	103816	169239	201938	141333	343595	288605	63761	31644.8	100500	303476	58856.7	20045.7	4122.48	43075.3	6609.59	10566.4	1.64477e+06
B300294	POS	9.17	269.248	C17 H32 O2	10Z-Heptadecenoic acid	0.0834656	94.8305	level1	BMDB		HMDB0060038	Lipids and lipid-like molecules	Fatty acids and conjugates	Fatty Acyls	Fatty acyls[FA]				1.84789e+06	1.39525e+06	1.06487e+06	1.49383e+06	2.49051e+06	2.11422e+06	1.26276e+06	1.81021e+06	1.25753e+06	1.47507e+06	1.60734e+06	1.59952e+06	1.45217e+06	1.5535e+06	1.53141e+06	2.07342e+06	922289	1.58966e+06	1.45177e+06	1.40669e+06	3.15536e+06	2.75963e+06	2.78271e+06	2.74586e+06	3.42868e+06	6.10801e+06	7.5781e+06	7.80407e+06	3.71131e+07	2.28905e+07	3.57727e+06
B300295	NEG	9.501	271.227	C16 H32 O3	2-Hydroxyhexadecanoic acid	-1.87318	94.157	level1	BMDB		HMDB0031057	Lipids and lipid-like molecules	Fatty acids and conjugates	Fatty Acyls	Fatty acyls[FA]				2.74779e+06	2.20944e+06	1.57958e+06	2.28442e+06	1.92639e+06	1.11098e+06	1.34628e+06	1.25877e+06	1.28625e+06	2.0081e+06	1.75732e+06	1.67946e+06	1.77699e+06	1.63512e+06	1.28519e+06	1.23221e+06	1.25822e+06	1.80831e+06	847838	1.19689e+06	1.3788e+06	1.09173e+06	719159	544078	579862	592071	618470	506773	2.2863e+06	1.56939e+06	865769
B300300	POS	7.975	287.222	C16 H30 O4	Hexadecanedioic acid	-0.0264945	97.4955	level1	BMDB	C19615	HMDB0000672	Lipids and lipid-like molecules	Fatty acids and conjugates	Fatty Acyls	Fatty acyls[FA]	Lipid metabolism	Cutin, suberine and wax biosynthesis	map00073 Cutin, suberine and wax biosynthesis; map01100 Metabolic pathways	1.22636e+07	9.32026e+06	1.66549e+07	2.59819e+07	1.22104e+07	1.14722e+07	1.56202e+07	1.58508e+07	1.82412e+07	1.39317e+07	1.19894e+07	1.6174e+07	1.70401e+07	1.70493e+07	1.29116e+07	1.44499e+07	1.14089e+07	1.86608e+07	1.77684e+07	1.57278e+07	9.64988e+06	5.8766e+06	4.06544e+06	1.05978e+07	7.85209e+06	8.3832e+06	5.26116e+06	3.88998e+06	5.64875e+06	4.78702e+06	2.35518e+07
B300302	NEG	9.004	295.227	C18 H32 O3	alpha-Dimorphecolic acid	-1.36089	92.3245	level1	BMDB	C14767	HMDB0004670	Lipids and lipid-like molecules	Lineolic acids and derivatives	Fatty Acyls	Fatty acyls[FA]	Lipid metabolism	Linoleic acid metabolism	map00591 Linoleic acid metabolism; map03320 PPAR signaling pathway	1.14071e+06	1.00568e+06	1.61277e+06	1.45634e+06	1.54823e+06	1.07637e+06	1.31599e+06	514943	1.57604e+06	860593	1.65029e+06	883315	649259	6.78718e+06	1.39574e+06	732901	1.39462e+06	722153	1.21509e+06	622377	3.61738e+06	2.18575e+06	4.08609e+06	1.50559e+06	5.18287e+06	1.44665e+06	5.63842e+06	3.13545e+06	7.6705e+06	1.81317e+07	754345
B300303	POS	9.555	297.279	C19 H36 O2	10Z-Nonadecenoic acid	-0.127171	95.6869	level1	BMDB	C00750	HMDB0013622	Lipids and lipid-like molecules	Fatty acids and conjugates	Fatty Acyls	Fatty acyls[FA]	Amino acid metabolism	Arginine and proline metabolism	map00330 Arginine and proline metabolism; map00410 beta-Alanine metabolism; map00480 Glutathione metabolism; map00770 Pantothenate and CoA biosynthesis; map01100 Metabolic pathways; map01240 Biosynthesis of cofactors; map04976 Bile secretion	1.16732e+06	809236	956706	687658	1.86343e+06	3.9422e+06	1.10953e+06	701468	754113	2.49776e+06	3.00164e+06	1.08444e+06	749536	3.26905e+06	870758	689879	1.79014e+06	740120	747339	687361	4.31656e+07	2.44769e+07	6.22405e+07	2.51268e+07	3.07784e+07	5.70526e+07	5.92532e+07	3.05803e+07	1.96504e+08	1.08481e+08	4.44513e+07
B300306	NEG	9.999	303.233	C20 H32 O2	Arachidonic acid	-1.18052	94.9168	level1	BMDB	C00219	HMDB0001043	Lipids and lipid-like molecules	Fatty acids and conjugates	Fatty Acyls	Fatty acyls[FA]	Lipid metabolism	Arachidonic acid metabolism	map00590 Arachidonic acid metabolism; map00591 Linoleic acid metabolism; map01040 Biosynthesis of unsaturated fatty acids; map01100 Metabolic pathways; map04216 Ferroptosis; map04217 Necroptosis; map04270 Vascular smooth muscle contraction; map04611 Platelet activation; map04664 Fc epsilon RI signaling pathway; map04666 Fc gamma R-mediated phagocytosis; map04723 Retrograde endocannabinoid signali…	7.05504e+07	7.71641e+07	1.13805e+08	5.43958e+07	9.01677e+07	7.38098e+07	6.49988e+07	7.56033e+07	7.77761e+07	1.07021e+08	7.00911e+07	7.88777e+07	5.31033e+07	1.10614e+08	1.01355e+08	7.94769e+07	9.91333e+07	8.29744e+07	5.73959e+07	7.95776e+07	1.45754e+08	8.39797e+07	8.48963e+07	6.23646e+07	1.19341e+08	7.40803e+07	2.46295e+08	2.64915e+08	8.34696e+08	5.02751e+08	1.41387e+08
B300307	NEG	10.285	305.248	C20 H34 O2	Dihomo-alpha-linolenic acid	-1.366	99.0083	level1	BMDB	C16522	HMDB0060039	Lipids and lipid-like molecules	Fatty acids and conjugates	Fatty Acyls	Fatty acyls[FA]	Lipid metabolism	Biosynthesis of unsaturated fatty acids	map01040 Biosynthesis of unsaturated fatty acids	1.55725e+06	1.18516e+06	3.33966e+06	2.92065e+06	3.91312e+06	1.30191e+06	1.57356e+06	998299	1.13522e+06	2.45981e+06	2.63262e+06	2.17143e+06	1.49555e+06	2.64622e+06	1.60796e+06	2.23355e+06	1.91583e+06	1.50638e+06	1.26381e+06	1.50118e+06	6.92817e+06	4.90915e+06	3.08426e+06	3.06931e+06	4.91513e+06	3.24502e+06	7.08429e+06	4.76144e+06	2.73093e+07	1.8254e+07	3.11472e+06
B300310	POS	4.923	313.155	C18 H20 N2 O3	Phenylalanylphenylalanine	-0.0772037	91.4718	level1	BMDB		HMDB0013302	Organic acids and derivatives	Amino acids, peptides, and analogues	Carboxylic acids and derivatives	Amino acids, peptides, and analogues				425671	293467	214338	343663	146388	306553	263105	241347	230103	207812	155937	211393	123076	273697	180621	267473	205634	169885	193962	205028	1.83352e+06	1.42825e+06	1.9857e+06	1.28002e+06	2.02812e+06	1.93723e+06	745780	2.36579e+06	262071	331720	349866
B300314	NEG	9.942	327.233	C22 H32 O2	Docosahexaenoic Acid	-0.885606	96.0077	level1	BMDB	C06429	HMDB0002183	Lipids and lipid-like molecules	Fatty acids and conjugates	Fatty Acyls	Fatty acyls[FA]	Lipid metabolism	Biosynthesis of unsaturated fatty acids	map01040 Biosynthesis of unsaturated fatty acids	7.51039e+06	7.58592e+06	1.14477e+07	4.89692e+06	9.78254e+06	8.89214e+06	7.33239e+06	8.11861e+06	7.74454e+06	1.08026e+07	9.76253e+06	1.11427e+07	5.28774e+06	1.93802e+07	1.2546e+07	1.16486e+07	1.5227e+07	1.20827e+07	5.55362e+06	8.83107e+06	2.06461e+07	1.35334e+07	1.19639e+07	8.72676e+06	1.61639e+07	9.54891e+06	3.90628e+07	3.6061e+07	1.35091e+08	7.7954e+07	2.54447e+07
B300317	NEG	10.385	331.264	C22 H36 O2	Adrenic acid	-0.95861	94.5522	level1	BMDB	C16527	HMDB0002226	Lipids and lipid-like molecules	Fatty acids and conjugates	Fatty Acyls	Fatty acyls[FA]	Lipid metabolism	Biosynthesis of unsaturated fatty acids	map01040 Biosynthesis of unsaturated fatty acids; map04216 Ferroptosis	4.22595e+06	3.98127e+06	7.74178e+06	3.54681e+06	5.73324e+06	5.34182e+06	4.78773e+06	4.42725e+06	4.98472e+06	6.54082e+06	1.02809e+07	8.73751e+06	4.12382e+06	9.2844e+06	7.35937e+06	5.59823e+06	7.36171e+06	6.28474e+06	6.75094e+06	5.38353e+06	1.60944e+07	1.68537e+07	1.09767e+07	8.86542e+06	6.96174e+06	6.6668e+06	4.54299e+07	2.26604e+07	1.69769e+08	1.63165e+08	1.67382e+07
B300322	POS	8.918	355.284	C21 H38 O4	MG(0:0/18:2(9Z,12Z)/0:0)	-0.158638	86.8872	level1	BMDB		HMDB0011538	Lipids and lipid-like molecules	Lineolic acids and derivatives	Fatty Acyls	Fatty acyls[FA]				435422	448676	158377	164408	242421	235503	223189	342431	420369	295317	169265	140409	227603	165162	3.13579e+06	314804	2.74477e+06	178466	278783	251671	287743	2.00351e+06	322212	79358.6	317185	551166	5.9576e+06	323709	745193	2.90116e+06	4.29153e+06
B300328	NEG	5.481	377.07	C18 H18 O7 S	Enterolactone 3''-sulfate	-0.847925	96.0224	level1	BMDB		HMDB0240506	Lignans, neolignans and related compounds	Tetrahydrofuran lignans	Furanoid lignans	Lignans and related compounds				66316.3	66130.7	69604.4	18505.6	28721.9	102144	73564.7	92473.7	108616	111810	34571.9	52953.7	81764.4	50057.7	82633.1	240716	77696.3	120095	115363	105844	63243.7	42391.7	19828.2	145996	89772.4	157341	119957	266449	130160	121442	261126
B300338	POS	9.49	454.293	C21 H44 N O7 P	LysoPE(0:0/16:0)	0.739594	97.36	level1	BMDB		HMDB0011473	Lipids and lipid-like molecules	Glycerophosphoethanolamines	Glycerophospholipids	Amines and derivatives				1.41021e+08	1.45616e+08	1.43157e+08	1.51192e+08	1.46485e+08	1.01333e+08	2.0103e+08	1.65477e+08	1.26008e+08	1.30449e+08	1.49081e+08	1.23118e+08	1.55993e+08	1.39767e+08	1.61962e+08	1.44086e+08	6.2818e+07	1.38356e+08	9.30896e+07	1.448e+08	1.50439e+08	1.96522e+08	1.75971e+08	1.11749e+08	1.13833e+08	1.57136e+08	1.92415e+08	1.13086e+08	4.67995e+08	2.9762e+08	1.25082e+08
B300341	NEG	8.017	471.242	C24 H40 O7 S	Chenodeoxycholic acid 3-sulfate	-1.24939	89.5949	level1	BMDB		HMDB0002586	Lipids and lipid-like molecules	Bile acids, alcohols and derivatives	Steroids and steroid derivatives	Bile acids, alcohols and derivatives				40148	22435.6	29157.9	240956	107187	80250.6	69359	62772.2	34315.9	49662.8	47737.9	28700.8	14682.9	17032.5	51905.4	22695.4	11536.6	30739.8	8280.17	19502.5	559472	18352.1	4764.63	380926	19731.2	1.0888e+06	760286	1.26966e+06	1.34695e+06	308914	1.30712e+06
B300343	NEG	9.754	476.278	C23 H44 N O7 P	LysoPE(0:0/18:2(9Z,12Z))	-1.3001	94.5498	level1	BMDB		HMDB0011477	Lipids and lipid-like molecules	Glycerophosphoethanolamines	Glycerophospholipids	Amines and derivatives				2.23975e+06	998901	2.30849e+06	2.34459e+06	2.60065e+06	1.82048e+06	2.06395e+06	1.90456e+06	1.91495e+06	2.83013e+06	2.05261e+06	2.28895e+06	1.85465e+06	2.17458e+06	2.08674e+06	2.53487e+06	2.79583e+06	1.89283e+06	2.20069e+06	2.49954e+06	1.89717e+06	1.52062e+06	871160	1.73006e+06	1.99658e+06	477163	4.00745e+06	3.25386e+06	8.2547e+06	6.75576e+06	2.66962e+06
B300344	NEG	10.008	478.293	C23 H46 N O7 P	LysoPE(18:1(9Z)/0:0)	-1.31987	99.0592	level1	BMDB		HMDB0011506	Lipids and lipid-like molecules	Glycerophosphoethanolamines	Glycerophospholipids	Amines and derivatives				4.55894e+06	5.31941e+06	7.1137e+06	6.48783e+06	8.98959e+06	4.82509e+06	9.12718e+06	5.16304e+06	4.45032e+06	7.8177e+06	5.0968e+06	5.87958e+06	5.17781e+06	5.1155e+06	7.20438e+06	5.60495e+06	8.63198e+06	6.95813e+06	3.87118e+06	7.25068e+06	8.40667e+06	1.05535e+07	8.11201e+06	8.94803e+06	6.8531e+06	6.21166e+06	2.18011e+07	8.88344e+06	7.51969e+07	3.62778e+07	4.69037e+06
B300345	NEG	10.36	480.309	C23 H48 N O7 P	LysoPE(0:0/18:0)	-1.33354	94.8606	level1	BMDB		HMDB0011129	Lipids and lipid-like molecules	Glycerophosphoethanolamines	Glycerophospholipids	Amines and derivatives				475697	645933	688894	1.07995e+06	864772	302385	1.0354e+06	904419	582322	472646	701408	341155	872937	585948	840658	569924	660226	1.04053e+06	299128	1.2044e+06	469548	903089	282245	652811	320195	538147	3.17087e+06	459540	3.3054e+07	2.3901e+07	1.06973e+06
B300348	NEG	9.725	500.277	C25 H44 N O7 P	LysoPE(20:4(5Z,8Z,11Z,14Z)/0:0)	-1.86481	96.4506	level1	BMDB		HMDB0011517	Lipids and lipid-like molecules	Glycerophosphoethanolamines	Glycerophospholipids	Amines and derivatives				170720	160601	273373	162675	190634	173110	155633	244275	269525	393106	176973	280131	206457	219196	211118	240322	309537	272817	204981	354525	190581	120127	68592.8	128474	332191	200604	1.12666e+06	1.09077e+06	3.05486e+06	2.06885e+06	224976
B300355	NEG	9.681	571.289	C25 H49 O12 P	LysoPI(16:0/0:0)	0.0103597	97.7684	level1	BMDB		HMDB0061695	Lipids and lipid-like molecules	Glycerophosphoinositols	Glycerophospholipids	Glycerophospholipids[GP]				418706	350214	958415	538925	539647	404153	1.21142e+06	903832	417586	609307	351186	268457	401764	491364	524003	440371	628878	620186	204092	424245	950304	907497	766092	447054	520622	1.04566e+06	4.36509e+06	2.20541e+06	9.82638e+06	7.89384e+06	546081
B300356	POS	7.552	583.255	C33 H34 N4 O6	Biliverdin	0.502576	80.6039	level1	BMDB	C00500	HMDB0001008	Organoheterocyclic compounds	Bilirubins	Tetrapyrroles and derivatives	Bilirubins	Metabolism of cofactors and vitamins	Porphyrin and chlorophyll metabolism	map00860 Porphyrin metabolism; map01100 Metabolic pathways; map01110 Biosynthesis of secondary metabolites	97848.7	99719.2	141649	170645	442594	415274	202629	5.14948e+06	384477	122151	405922	236710	290213	529994	814890	669637	1.12497e+06	92226.8	144498	447218	199829	80607	213348	263004	116881	30772.7	35022.9	102003	401892	216906	158158
B300359	NEG	9.772	597.304	C27 H51 O12 P	LysoPI(18:1(9Z)/0:0)	-0.420693	98.9524	level1	BMDB		HMDB0061693	Lipids and lipid-like molecules	Glycerophosphoinositols	Glycerophospholipids	Glycerophospholipids[GP]				155108	127266	499658	279768	299369	192426	311746	327820	195599	490877	155148	120891	134822	167530	149661	196000	338368	345080	90177.8	275423	799454	1.28227e+06	661272	649221	796230	1.38338e+06	5.66381e+06	3.66968e+06	1.14068e+07	7.30217e+06	422426
B300377	POS	3.951	245.186	C12 H24 N2 O3	Leucylleucine	0.490789	90.7905	level1	BMDB	C11332	HMDB0028933	Organic acids and derivatives	Amino acids, peptides, and analogues	Carboxylic acids and derivatives	Amino acids, peptides, and analogues				9.82114e+06	6.78446e+06	6.53934e+06	8.78187e+06	1.6933e+06	5.75313e+06	3.17199e+06	3.50504e+06	3.9205e+06	3.5882e+06	3.69483e+06	2.54293e+06	2.94607e+06	2.64239e+06	4.75516e+06	6.46982e+06	3.62729e+06	4.09863e+06	3.20911e+06	3.86642e+06	9.90902e+06	6.56993e+06	1.81552e+07	2.40089e+07	1.98478e+07	2.25727e+07	8.25199e+06	3.86094e+07	2.52822e+06	4.02126e+06	8.43206e+06
B300380	POS	2.969	247.129	C10 H18 N2 O5	Aspartyl-Leucine	1.25761	86.7402	level1	BMDB		HMDB0028757	Organic acids and derivatives	Amino acids, peptides, and analogues	Carboxylic acids and derivatives	Amino acids, peptides, and analogues				1.452e+06	1.2581e+06	455268	525342	1.32624e+06	857440	2.1256e+06	977570	842144	793849	1.4526e+06	2.23062e+06	1.0391e+06	1.76794e+06	1.39892e+06	1.93679e+06	399721	470242	1.18647e+06	317946	2.1215e+06	1.56104e+06	5.32139e+06	3.85867e+06	5.77303e+06	2.77576e+06	528107	4.08787e+06	408533	362026	419573
B300381	POS	2.734	247.129	C10 H18 N2 O5	gamma-Glutamylvaline	0.696851	95.6543	level1	BMDB		HMDB0011172	Organic acids and derivatives	Amino acids, peptides, and analogues	Carboxylic acids and derivatives	Amino acids, peptides, and analogues				4.17019e+07	3.93252e+07	3.00758e+07	2.6576e+07	2.89535e+07	2.77008e+07	2.97179e+07	2.97979e+07	3.20144e+07	2.84854e+07	3.85483e+07	4.19881e+07	2.8053e+07	3.90696e+07	3.38941e+07	5.23212e+07	2.35013e+07	4.30235e+07	4.13349e+07	3.45483e+07	2.04148e+07	1.83427e+07	8.60283e+06	5.11472e+06	5.30978e+07	1.73874e+07	1.85993e+07	9.56067e+06	1.28158e+07	2.35722e+07	9.67773e+06
B300395	POS	9.053	293.247	C19 H32 O2	5alpha-Androstane-3beta,17beta-diol	-0.0745274	95.9316	level1	BMDB	C12525	HMDB0000493	Lipids and lipid-like molecules	Androstane steroids	Steroids and steroid derivatives	Steroids and derivatives				937591	738691	642989	912267	1.03672e+06	956657	624865	550149	606940	1.78845e+06	1.14831e+06	460725	535378	1.21275e+06	919551	908232	472363	665253	466174	575989	640267	4.37969e+06	1.15243e+06	1.62503e+06	4.05749e+06	9.99729e+06	9.9033e+06	5.75429e+06	5.42385e+06	1.78252e+07	1.25424e+06
B300396	POS	3.973	295.129	C14 H18 N2 O5	gamma-Glutamylphenylalanine	-0.432226	78.0461	level1	BMDB		HMDB0000594	Organic acids and derivatives	Amino acids, peptides, and analogues	Carboxylic acids and derivatives	Amino acids, peptides, and analogues				1.77603e+07	1.17722e+07	9.73498e+06	8.25178e+06	9.50879e+06	1.34022e+07	1.08417e+07	9.0287e+06	1.16254e+07	1.09099e+07	8.51207e+06	1.21494e+07	6.8528e+06	1.16989e+07	1.08286e+07	1.52321e+07	1.24671e+07	1.12839e+07	1.34494e+07	1.429e+07	1.30066e+07	2.43612e+07	8.7101e+06	7.09594e+06	3.40262e+07	1.41322e+07	1.36748e+07	1.27038e+07	1.33147e+07	1.26757e+07	6.24599e+06
B300399	POS	2.838	311.124	C14 H18 N2 O6	gamma-Glutamyltyrosine	0.426946	94.7843	level1	BMDB		HMDB0011741	Organic acids and derivatives	Amino acids, peptides, and analogues	Carboxylic acids and derivatives	Amino acids, peptides, and analogues				3.96048e+06	1.72565e+06	1.49777e+06	1.55128e+06	1.40556e+06	2.37862e+06	1.14319e+06	1.96078e+06	1.83069e+06	860501	1.06082e+06	1.60395e+06	1.28203e+06	1.80778e+06	1.36709e+06	2.15118e+06	2.1314e+06	1.81176e+06	2.14888e+06	1.56037e+06	5.40723e+06	5.83252e+06	2.87081e+06	2.45916e+06	8.41316e+06	4.10749e+06	4.76644e+06	5.47799e+06	5.21764e+06	4.70078e+06	2.18658e+06
B300404	POS	9.434	324.29	C20 H37 N O2	Linoleoyl ethanolamide	-0.406349	86.7788	level1	BMDB		HMDB0012252	Organic nitrogen compounds	Amines	Organonitrogen compounds	Amines				4.12305e+06	4.69885e+06	2.82622e+06	2.15244e+06	3.73595e+06	4.61492e+06	2.3127e+06	6.08382e+06	2.70616e+06	4.63008e+06	7.2537e+06	3.86005e+06	3.05818e+06	7.50542e+06	2.48062e+06	3.11012e+06	1.27598e+07	1.39673e+06	3.24627e+06	5.30248e+06	1.18878e+07	9.88189e+06	2.98135e+07	1.29016e+07	8.08511e+06	3.63391e+07	1.69672e+07	2.58955e+07	2.08249e+07	1.29025e+07	1.0714e+07
B300406	POS	9.657	353.266	C19 H38 O4	MG(16:0/0:0/0:0)	-0.299862	93.5278	level1	BMDB		HMDB0011564	Lipids and lipid-like molecules	Monoradylglycerols	Glycerolipids	Glycerolipids[GL]				8.7176e+06	7.2819e+06	8.50184e+06	7.28091e+06	5.43311e+06	5.86944e+06	7.84296e+06	3.87851e+06	4.65864e+06	8.4479e+06	5.77463e+06	7.15119e+06	7.26282e+06	9.05741e+06	7.7997e+06	6.52105e+06	6.30132e+06	9.92676e+06	4.94283e+06	4.68981e+06	8.49639e+06	8.93747e+06	7.8812e+06	5.19295e+06	5.82556e+06	3.06502e+06	8.71695e+06	7.68612e+06	2.32162e+07	3.31276e+06	2.64342e+06
B300409	POS	4.175	334.14	C16 H19 N3 O5	gamma-Glutamyltryptophan	-0.296466	82.6975	level1	BMDB		HMDB0029160	Organic acids and derivatives	Amino acids, peptides, and analogues	Carboxylic acids and derivatives	Amino acids, peptides, and analogues				695306	514092	365182	465742	255735	475081	356076	398576	544686	281617	172823	356325	357376	402527	434962	794356	346959	601314	503089	412700	691532	605123	422566	374858	1.06953e+06	569066	660740	735402	698725	258756	410349
B300410	POS	7.442	342.264	C19 H35 N O4	trans-2-Dodecenoylcarnitine	-0.177629	91.611	level1	BMDB		HMDB0013326	Lipids and lipid-like molecules	Fatty acid esters	Fatty Acyls	Fatty acyls[FA]				13171.3	5519.65	5602.92	9277.36	5432.09	7288.95	6060.46	5581.54	9201.59	7273.88	8912.42	6197.72	7006.08	7375.59	6424.73	5685.3	33527.8	5968.82	5929.82	5207.25	37685	58652.5	10005.3	56019.4	55798.1	9431.12	6005.07	15708.8	8031.49	13138.8	16079.4
B300411	POS	8.834	357.279	C24 H36 O2	Tetracosahexaenoic acid	-0.0714638	98.6914	level1	BMDB		HMDB0002007	Lipids and lipid-like molecules	Fatty acids and conjugates	Fatty Acyls	Fatty acyls[FA]				926948	973623	617579	979019	1.08064e+06	3.17955e+06	1.44219e+06	1.32352e+06	1.07893e+06	1.12427e+06	1.24858e+06	1.52797e+06	1.32719e+06	1.22561e+06	2.8908e+06	1.7376e+06	8.70265e+06	990539	1.37555e+06	756053	1.71502e+06	3.01918e+06	6.60776e+06	4.89103e+06	6.95673e+06	5.06196e+06	1.76814e+06	1.04017e+07	4.99717e+06	1.8318e+06	4.06937e+06
B300412	POS	9.778	379.282	C21 H40 O4	MG(0:0/18:1(9Z)/0:0)	-0.256851	98.2404	level1	BMDB		HMDB0011537	Lipids and lipid-like molecules	Monoradylglycerols	Glycerolipids	Glycerolipids[GL]				2.69292e+08	2.46627e+08	3.30981e+08	2.99759e+08	3.07691e+08	1.63907e+08	2.54672e+08	1.97314e+08	2.16805e+08	3.04143e+08	2.51486e+08	2.37784e+08	1.88569e+08	2.73361e+08	2.35797e+08	2.67375e+08	4.02179e+08	2.87055e+08	1.9222e+08	2.72952e+08	2.51961e+08	2.87928e+08	2.23203e+08	2.00708e+08	2.09856e+08	1.56688e+08	4.55283e+08	2.67632e+08	1.03929e+09	1.03445e+09	1.99162e+08
B300415	POS	9.242	375.289	C24 H38 O3	3b-Hydroxy-5-cholenoic acid	-0.143511	91.233	level1	BMDB		HMDB0000308	Lipids and lipid-like molecules	Bile acids, alcohols and derivatives	Steroids and steroid derivatives	Bile acids, alcohols and derivatives				531114	668561	323975	420071	828364	291470	382299	380775	221340	245767	560411	279514	232300	153491	483103	239935	1.65404e+07	225986	255457	5.38353e+06	269199	729124	514748	167896	368351	182300	683947	876054	1.30124e+06	674003	1.58466e+06
B300416	POS	9.54	379.284	C23 H38 O4	MG(0:0/20:4(5Z,8Z,11Z,14Z)/0:0)	-0.244221	95.8042	level1	BMDB	C13856	HMDB0004666	Lipids and lipid-like molecules		Endocannabinoids	Glycerolipids[GL]			map04080 Neuroactive ligand-receptor interaction; map04714 Thermogenesis; map04723 Retrograde endocannabinoid signaling	1.12355e+07	1.28878e+07	1.59537e+07	1.02369e+07	1.13426e+07	1.32576e+07	1.07858e+07	1.96677e+07	1.70233e+07	2.01972e+07	1.92088e+07	1.15122e+07	2.58688e+07	1.35223e+07	1.6418e+07	1.92509e+07	2.43281e+07	2.39382e+07	1.46567e+07	2.44299e+07	8.85429e+06	3.63524e+06	2.04675e+06	1.43164e+06	2.96027e+06	1.63171e+06	6.39706e+06	7.07793e+06	2.41599e+07	2.31525e+07	7.1189e+06
B300418	POS	3.157	384.115	C14 H17 N5 O8	Succinyladenosine	-0.221621	86.6156	level1	BMDB		HMDB0000912	Nucleosides, nucleotides, and analogues		Purine nucleosides	Purines and derivatives				2.81296e+06	2.34352e+06	1.52919e+06	961016	1.32268e+06	704415	1.17427e+06	1.14474e+06	1.21826e+06	967752	1.33662e+06	1.31625e+06	1.1427e+06	933977	821776	1.51112e+06	207387	755369	633407	1.30186e+06	189545	1.22498e+06	886645	501770	922322	430777	102397	303316	291927	169316	118096
B300420	POS	8.633	417.336	C27 H44 O3	3beta-Hydroxy-5-cholestenoic acid	0.0641542	85.3567	level1	BMDB		HMDB0012453	Lipids and lipid-like molecules	Bile acids, alcohols and derivatives	Steroids and steroid derivatives	Bile acids, alcohols and derivatives				1.18684e+06	1.29497e+06	1.61617e+06	1.99943e+06	2.22666e+06	1.37731e+06	1.23908e+06	1.81925e+06	711747	1.2587e+06	1.98697e+06	1.24455e+06	1.3524e+06	1.13801e+06	1.31289e+06	884521	2.40791e+06	977241	568998	1.69288e+06	1.21489e+06	643727	583851	2.89757e+06	1.188e+06	1.57228e+06	2.39107e+06	1.86513e+06	1.53791e+06	1.01987e+06	3.62101e+06
B300422	POS	9.191	452.277	C21 H42 N O7 P	LysoPE(0:0/16:1(9Z))	0.491625	87.2498	level1	BMDB		HMDB0011474	Lipids and lipid-like molecules	Glycerophosphoethanolamines	Glycerophospholipids	Amines and derivatives				1.21223e+07	1.19038e+07	1.41235e+07	1.26704e+07	2.09225e+07	1.70673e+07	2.05107e+07	1.48963e+07	1.30121e+07	1.72786e+07	2.00688e+06	2.40585e+07	1.62238e+07	1.74424e+07	1.63111e+07	1.66331e+07	2.47609e+07	1.37743e+07	1.0178e+07	2.08216e+07	4.70432e+07	3.32832e+07	2.76739e+07	2.68279e+07	3.42155e+07	3.12685e+07	4.56424e+07	3.60922e+07	1.17139e+08	4.6011e+07	1.44142e+07
B300423	POS	9.059	468.309	C22 H46 N O7 P	LysoPC(14:0/0:0)	0.88183	95.9549	level1	BMDB		HMDB0010379	Lipids and lipid-like molecules	Glycerophosphocholines	Glycerophospholipids	Glycerophospholipids[GP]				1.92238e+06	2.37685e+06	3.60212e+06	1.51403e+06	2.56865e+06	3.80935e+06	3.44384e+06	3.228e+06	3.12971e+06	3.21288e+06	1.48881e+06	2.59293e+06	1.50928e+06	2.84709e+06	2.10458e+06	2.03261e+06	3.37882e+06	3.47949e+06	1.00032e+06	2.49302e+06	2.57818e+07	2.94187e+07	2.10876e+07	1.23054e+07	3.77584e+07	2.65452e+07	1.13673e+08	1.00334e+08	3.33352e+08	1.07673e+08	2.51809e+06
B300424	POS	9.613	480.345	C24 H50 N O6 P	LysoPC(P-16:0/0:0)	1.01941	94.1908	level1	BMDB		HMDB0010407	Lipids and lipid-like molecules	Glycerophosphocholines	Glycerophospholipids	Glycerophospholipids[GP]				1.46501e+06	2.12183e+06	3.82618e+06	1.43118e+06	3.33405e+06	2.14287e+06	2.00311e+06	2.72172e+06	1.36153e+06	4.50548e+06	1.72618e+06	2.19419e+06	1.55134e+06	4.01938e+06	3.13273e+06	2.54376e+06	3.5779e+06	3.96958e+06	1.08078e+06	2.87054e+06	1.04728e+07	9.49103e+06	5.95091e+06	1.01272e+07	1.19061e+07	6.05478e+06	2.39458e+07	1.60745e+07	8.65225e+07	3.68001e+07	8.88413e+06
B300427	POS	9.477	496.34	C24 H50 N O7 P	LysoPC(16:0/0:0)	1.40759	95.9019	level1	BMDB	C04230	HMDB0010382	Lipids and lipid-like molecules	Glycerophosphocholines	Glycerophospholipids	Glycerophospholipids[GP]	Lipid metabolism	Glycerophospholipid metabolism	map00564 Glycerophospholipid metabolism; map05231 Choline metabolism in cancer	5.1978e+07	6.82329e+07	9.79114e+07	5.22895e+07	8.20279e+07	6.84926e+07	1.22828e+08	9.20238e+07	6.57667e+07	1.1648e+08	4.0858e+07	5.55027e+07	4.16576e+07	8.95347e+07	8.54931e+07	6.41247e+07	7.78321e+07	8.31921e+07	2.57873e+07	6.38234e+07	2.6453e+08	2.85567e+08	2.19339e+08	1.61952e+08	4.19571e+08	1.68602e+08	6.85088e+08	5.97371e+08	1.58923e+09	8.23544e+08	1.31378e+08
B300431	POS	9.972	510.393	C26 H56 N O6 P	LysoPC(O-18:0/0:0)	1.56485	94.9353	level1	BMDB	C04317	HMDB0011149	Lipids and lipid-like molecules	Glycerophosphocholines	Glycerophospholipids	Glycerophospholipids[GP]	Lipid metabolism	Ether lipid metabolism	map00565 Ether lipid metabolism; map01100 Metabolic pathways	3.75473e+06	9.88004e+06	7.80665e+06	4.12832e+06	8.47504e+06	2.39423e+06	4.03261e+06	9.43337e+06	3.67832e+06	8.61054e+06	7.04351e+06	3.49863e+06	7.63093e+06	9.63301e+06	1.19907e+07	1.0731e+07	8.0447e+06	1.44655e+07	3.64253e+06	1.26011e+07	9.17707e+06	2.56381e+07	5.51769e+06	1.45917e+07	9.05073e+06	1.47777e+07	3.78698e+07	1.28121e+07	3.8358e+08	1.37627e+08	1.56571e+07
B300434	POS	9.317	520.341	C26 H50 N O7 P	LysoPC(0:0/18:2(9Z,12Z))	1.55378	95.988	level1	BMDB		HMDB0061700	Lipids and lipid-like molecules	Glycerophosphocholines	Glycerophospholipids	Glycerophospholipids[GP]				1.06714e+07	1.17694e+07	2.60957e+07	1.2409e+07	1.16487e+07	1.26916e+07	1.38394e+07	2.09508e+07	1.95135e+07	3.64702e+07	7.00462e+06	9.74094e+06	6.7931e+06	1.3612e+07	1.5295e+07	1.72763e+07	2.03784e+07	2.13399e+07	8.65748e+06	1.85904e+07	2.2833e+07	1.20995e+07	8.51229e+06	1.34472e+07	4.71241e+07	1.87844e+07	9.20295e+07	8.24452e+07	1.84995e+08	1.41471e+08	3.42716e+07
B300436	POS	9.719	524.371	C26 H54 N O7 P	LysoPC(0:0/18:0)	0.794475	94.0493	level1	BMDB		HMDB0011128	Lipids and lipid-like molecules	Glycerophosphocholines	Glycerophospholipids	Glycerophospholipids[GP]				3.75781e+06	7.50355e+06	6.33814e+06	4.00626e+06	4.77118e+06	2.9234e+06	9.34582e+06	6.98177e+06	3.04227e+06	6.98103e+06	4.63115e+06	2.67776e+06	3.3107e+06	6.49014e+06	4.90056e+06	4.11061e+06	4.68483e+06	6.38006e+06	2.11706e+06	5.21783e+06	4.09369e+06	6.93765e+06	5.24171e+06	4.88019e+06	4.53821e+06	4.85025e+06	1.50665e+07	6.16201e+06	5.02935e+07	3.95163e+07	4.32988e+06
B300452	POS	10.789	678.506	C36 H72 N O8 P	PC(14:0/14:0)	-1.62802	88.0877	level1	BMDB		HMDB0007866	Lipids and lipid-like molecules	Glycerophosphocholines	Glycerophospholipids	Glycerophospholipids[GP]				39653.8	42331.5	35746.7	44122.1	38799.2	39502	37312.7	35243.4	34481.9	42740.8	41631.4	45473.8	38275.8	34488.3	41533	37948.7	56521	39210.3	42580.9	31626.6	40154.4	32656.4	33472.2	29913.6	29203.2	36960.8	66666.1	73708.4	5.64812e+07	6.25494e+07	49979.4
B300453	POS	11.255	703.574	C39 H79 N2 O6 P	SM(d18:1/16:0)	-1.01244	94.7072	level1	BMDB		HMDB0010169	Lipids and lipid-like molecules	Phosphosphingolipids	Sphingolipids	Sphingolipids[SP]				42855.6	43675.1	40911.8	44327.8	40276.6	31322.9	41479.6	36198.8	36714.2	34893.9	44113.5	34969.9	42024.1	36882.1	46759.3	40300.3	41179.3	42848.1	41400.1	36890.5	40942.7	52223.3	34912.1	35522.6	32518.4	36756.9	44198.4	35322.8	4.87835e+07	7.22045e+07	71761.4
B300454	POS	11.252	706.537	C38 H76 N O8 P	PC(14:0/16:0)	-0.926487	91.7735	level1	BMDB		HMDB0007869	Lipids and lipid-like molecules	Glycerophosphocholines	Glycerophospholipids	Glycerophospholipids[GP]				42862.1	43148.9	40442.9	44666.5	40010.9	31307.5	40997.7	35765.5	36672.6	34483.9	43686.7	34782.2	41784	37187.4	46692.9	39825.9	40690.7	42445.4	41276.3	37037.6	38533.1	159886	34491.6	35638.5	32346.4	36415.9	43809.5	35098.7	1.52691e+08	1.79153e+08	105796
B300456	POS	11.702	718.574	C40 H80 N O7 P	PC(P-16:0/16:0)	-0.876406	90.7768	level1	BMDB		HMDB0011206	Lipids and lipid-like molecules	Glycerophosphocholines	Glycerophospholipids	Glycerophospholipids[GP]				59926.1	60533.4	55285.9	65180.5	55778.9	47441	56105.2	47704.9	54583.2	49644.9	62295.1	52378.4	60715.8	51947.7	64753.8	52762.3	55132.8	57074.9	57628.8	49680	55496.8	53053.1	48279.2	45693.2	44337.7	56921.9	63957.3	48931.4	3.56055e+07	2.68843e+07	41689.9
B300458	POS	10.946	730.538	C40 H76 N O8 P	PC(14:0/18:2(9Z,12Z))	-0.597014	95.0799	level1	BMDB		HMDB0007874	Lipids and lipid-like molecules	Glycerophosphocholines	Glycerophospholipids	Glycerophospholipids[GP]				39016.3	36429.7	35540.7	39332.8	34120.7	28540.3	34942.9	31319	33840.8	30429.3	36028.9	34694.8	36860.9	31286.3	39331	34684.3	34331	39449.2	36124.2	34694.8	36500.9	46201.8	30375.6	30064.7	28858.3	31351.8	37439.5	31257.6	1.88565e+07	1.26846e+07	29763.1
B300460	POS	11.321	732.554	C40 H78 N O8 P	PC(16:0/16:1(9Z))	-0.559087	93.7193	level1	BMDB		HMDB0007969	Lipids and lipid-like molecules	Glycerophosphocholines	Glycerophospholipids	Glycerophospholipids[GP]				64429.8	66017.8	61117.8	76996.4	59191.5	50418.2	64238.9	56801.2	58528.5	53734.5	66857	56535.1	64466.5	56808.9	72004.9	59510.8	62562.8	66600.7	67327.8	59600.6	69691	639476	53849	51207.4	48880.2	57442.4	67421.8	55163.4	3.39655e+08	3.37068e+08	350472
B300463	POS	11.742	742.574	C42 H80 N O7 P	PC(P-16:0/18:2(9Z,12Z))	-0.294377	94.5716	level1	BMDB		HMDB0011211	Lipids and lipid-like molecules	Glycerophosphocholines	Glycerophospholipids	Glycerophospholipids[GP]				66426.8	65368.5	53788.7	66930.5	59506.6	48307.3	53522.1	53610.7	56747.3	48754.6	55089.2	60068.7	56467.9	59261.2	62589.6	57639.2	55919.4	59727.7	67161.8	53499.2	58564.2	53218.5	46901.2	48268.9	45739.8	57853.2	60747.4	46798.5	2.03073e+07	1.96549e+07	41122.6
B300466	POS	11.875	744.59	C42 H82 N O7 P	PC(P-16:0/18:1(9Z))	-0.221952	94.7375	level1	BMDB		HMDB0011210	Lipids and lipid-like molecules	Glycerophosphocholines	Glycerophospholipids	Glycerophospholipids[GP]				44099.1	47392.5	42682.8	47633	41440.6	34340.3	38843.8	36335.4	38870.2	36862.8	41755.8	38427.7	42875.2	40549.4	53554.9	40308.9	41901	45260.2	44184.1	38872.1	41164.5	152694	36984.2	35020.2	33332.7	37324.6	44615.1	36555.5	1.47025e+08	1.48983e+08	214756
B300468	POS	12.462	746.606	C42 H84 N O7 P	PC(O-16:1(9Z)/18:0)	-0.272595	95.0027	level1	BMDB		HMDB0013412	Lipids and lipid-like molecules	Glycerophosphocholines	Glycerophospholipids	Glycerophospholipids[GP]				66371.7	66217.4	59617.8	74455.3	59982.9	52413.4	59603.8	53223.8	58234.7	52904.6	66078.4	55723.6	62158.9	54771.5	68777.5	59215.2	57624.2	62313.4	63685.5	56509.3	59084.2	249123	52771.7	50672.8	47256.6	56749.1	66038.9	52172	1.38886e+08	1.12925e+08	181923
B300473	POS	11.032	756.552	C42 H78 N O8 P	PC(16:0/18:3(9Z,12Z,15Z))	-1.83864	94.6838	level1	BMDB		HMDB0007975	Lipids and lipid-like molecules	Glycerophosphocholines	Glycerophospholipids	Glycerophospholipids[GP]				39730	43599.1	39598.6	47922.4	37832.3	31394.2	37786.9	36994.9	34210.3	33682.8	41394	35726.2	41755.9	35133.7	45280.8	41688.2	40595.3	40628.4	40922.8	38164.8	39667.6	37843	33645	33385	31237.2	38698	42918.2	35438.8	2.02495e+07	2.46684e+07	33222.1
B300475	POS	11.401	758.568	C42 H80 N O8 P	PC(16:0/18:2(9Z,12Z))	-1.65789	92.2832	level1	BMDB		HMDB0007973	Lipids and lipid-like molecules	Glycerophosphocholines	Glycerophospholipids	Glycerophospholipids[GP]				24139.3	132730	54239.6	66432.5	50626.8	45377.1	49512.4	68440.1	25247.1	48699.5	56843.3	25254.3	54662.9	72304.8	60109.6	52825.6	55644.3	61184.8	65855.5	49307.2	192819	643848	46287.9	45941.7	42413.6	52275.3	58219	50459.7	4.19531e+08	3.61509e+08	274117
B300479	POS	11.767	768.589	C44 H82 N O7 P	PC(O-16:0/20:4(8Z,11Z,14Z,17Z))	-1.57448	92.5553	level1	BMDB		HMDB0013407	Lipids and lipid-like molecules	Glycerophosphocholines	Glycerophospholipids	Glycerophospholipids[GP]				73726.4	71157.3	68144.9	84003.1	67822.2	53375.8	64897.9	58319.9	60678.8	58360.9	67369.2	63536.1	66729	62292.3	76977.9	63621.3	67941.6	72279.2	76758	60851.7	66213.3	65944.9	58728.7	54681.5	54075.5	62949.1	72745.1	56748.6	4.12729e+07	4.43278e+07	48155.3
B300480	POS	11.949	770.605	C44 H84 N O7 P	PC(P-18:0/18:2(9Z,12Z))	-1.65735	91.3493	level1	BMDB		HMDB0011244	Lipids and lipid-like molecules	Glycerophosphocholines	Glycerophospholipids	Glycerophospholipids[GP]				63911.3	61744.8	57090	68833.2	60356	46611.3	56555.9	49506.7	54448.6	49204.5	59613	51949.2	61477.2	49424.6	66351.1	55297.6	58405.4	59435.4	63745.4	51494	55734.2	53562.5	53073.1	46934	44958.1	52727.6	62482.3	48229.3	1.76445e+07	2.21168e+07	44999.2
B300481	POS	12.699	772.62	C44 H86 N O7 P	PC(P-18:0/18:1(11Z))	-1.48275	93.4119	level1	BMDB		HMDB0011242	Lipids and lipid-like molecules	Glycerophosphocholines	Glycerophospholipids	Glycerophospholipids[GP]				158795	160744	148499	169086	147593	115356	142356	129753	148154	138218	152122	139388	153041	136187	161979	146061	152063	150453	166210	129325	144442	135922	131164	116701	114948	130716	146577	127925	6.23364e+07	7.30182e+07	106184
B300485	POS	11.384	782.568	C44 H80 N O8 P	PC(16:0/20:4(5Z,8Z,11Z,14Z))	-1.48566	92.2812	level1	BMDB		HMDB0007982	Lipids and lipid-like molecules	Glycerophosphocholines	Glycerophospholipids	Glycerophospholipids[GP]				57769.8	38274.4	41247.8	44395.5	33979.4	31692.1	35372.4	31942.7	38937	34530.9	38135.7	34232.6	37150.5	23224.3	42192	35210.3	39112.8	41151.6	27207.3	34729.1	30614.8	33924.8	33337.5	32071.4	26165.8	34829.4	38782.6	31098	3.82078e+07	5.27915e+07	28782.8
B300486	POS	11.159	782.568	C44 H80 N O8 P	PC(18:2(9Z,12Z)/18:2(9Z,12Z))	-1.4845	93.8058	level1	BMDB		HMDB0008138	Lipids and lipid-like molecules	Glycerophosphocholines	Glycerophospholipids	Glycerophospholipids[GP]				50870.7	51309.1	47944.7	58082	47444.8	37527.2	47180.5	39518.5	43190.9	41150.9	50342.6	45258.9	48056.6	42055.9	55102.4	45136.3	46858.5	47663.6	51128.5	45698.2	48305.7	47594	41106	40191.5	38642.6	42450.3	53076.6	41021.9	1.54933e+07	2.3463e+07	37970
B300487	POS	11.55	784.584	C44 H82 N O8 P	PC(16:0/20:3(8Z,11Z,14Z))	-1.1712	93.6806	level1	BMDB	C00157	HMDB0007981	Lipids and lipid-like molecules	Glycerophosphocholines	Glycerophospholipids	Glycerophospholipids[GP]	Lipid metabolism	Glycerophospholipid metabolism	map00564 Glycerophospholipid metabolism; map00590 Arachidonic acid metabolism; map00591 Linoleic acid metabolism; map00592 alpha-Linolenic acid metabolism; map01100 Metabolic pathways; map01110 Biosynthesis of secondary metabolites; map04723 Retrograde endocannabinoid signaling; map05231 Choline metabolism in cancer	50798.9	50356.8	45687.5	57302.3	47574.7	40836.7	47638.5	42617.8	49575	42445	53776.6	49120.8	50635.1	49469.3	59563.2	46867.6	46495	54426.2	57950.2	48830.8	54099.2	131029	43978.5	45572.6	40939.1	45686.5	53201.3	44356.6	9.61205e+07	1.41971e+08	101692
B300489	POS	12.046	786.6	C44 H84 N O8 P	PC(18:0/18:2(9Z,12Z))	-1.06951	93.3547	level1	BMDB		HMDB0008039	Lipids and lipid-like molecules	Glycerophosphocholines	Glycerophospholipids	Glycerophospholipids[GP]				53408	57738.6	52244.8	61118.5	53775.9	42220.6	51481.4	46674.5	47758.3	45290.7	57195.5	45753.8	52783.4	46785.8	58718.5	50099.9	52979.9	53953.6	54416.5	46607	147510	1.19548e+06	48117.9	41629.2	41448.1	48355.3	58042.5	45988.4	3.97128e+08	4.35911e+08	438662
B300490	POS	12.8	788.616	C44 H86 N O8 P	PC(18:0/18:1(11Z))	-1.08148	92.2694	level1	BMDB		HMDB0008037	Lipids and lipid-like molecules	Glycerophosphocholines	Glycerophospholipids	Glycerophospholipids[GP]				186274	191899	181004	198456	168302	137853	181510	165258	163882	149160	180365	163160	191290	157916	201799	176475	176473	185978	184431	162031	169750	163747	147485	147757	135581	162771	196087	153659	5.51552e+07	6.41679e+07	133908
B300494	POS	11.841	794.605	C46 H84 N O7 P	PC(P-18:0/20:4(8Z,11Z,14Z,17Z))	-0.979181	89.2174	level1	BMDB		HMDB0011254	Lipids and lipid-like molecules	Glycerophosphocholines	Glycerophospholipids	Glycerophospholipids[GP]				54004.9	56280.6	51142.4	58390.3	54393.1	41182.4	50614.2	45099.6	47940.3	45482.6	53854.2	45870.2	53685.9	46176.2	63788.4	53093.6	53776.4	56262	57285.3	46107.8	52309.4	51596.1	47205.4	40012.1	41539.1	51471.7	56699.2	44497.7	1.05819e+07	1.03417e+07	38633.1
B300495	POS	12.351	796.621	C46 H86 N O7 P	PC(O-18:0/20:4(8Z,11Z,14Z,17Z))	-1.00686	94.5626	level1	BMDB		HMDB0013420	Lipids and lipid-like molecules	Glycerophosphocholines	Glycerophospholipids	Glycerophospholipids[GP]				55003.8	56005.6	51463.1	60134.2	52073.5	45274.6	49541.9	45733.7	48655.1	43393.5	54545.2	46872	54739.6	45755.3	57849.8	49670.3	51647.7	57122.7	56105.5	45771.5	51649	49217.5	46282.9	42640	40999.7	47030.2	57766.4	45584.2	1.87243e+07	1.90158e+07	42195.2
B300498	POS	11.437	808.585	C46 H82 N O8 P	PC(16:0/22:5(4Z,7Z,10Z,13Z,16Z))	-0.712821	89.2436	level1	BMDB		HMDB0007989	Lipids and lipid-like molecules	Glycerophosphocholines	Glycerophospholipids	Glycerophospholipids[GP]				50463.8	53377.5	49857.9	57774	45869.8	39122.1	46601	42240	49128.4	40973.2	49424.5	44755.1	51807.6	41682.2	52419.8	45984	47439.2	49130.1	50247.8	44261.9	46953.6	43006	40852.2	40241.9	36678.5	43050.6	53599.1	42438.7	1.58215e+07	1.73431e+07	35792.4
B300500	POS	12.018	810.6	C46 H84 N O8 P	PC(18:0/20:4(5Z,8Z,11Z,14Z))	-0.976852	89.7228	level1	BMDB		HMDB0008048	Lipids and lipid-like molecules	Glycerophosphocholines	Glycerophospholipids	Glycerophospholipids[GP]				82775.5	56451	52748.5	62918.2	50731.6	57227.2	50629.4	48273.3	57984.6	44662.5	57920.8	45788.3	54011.6	61744.9	61097.2	51787.4	49893.1	56342.5	55961.4	47592	53942.5	51640.6	46375.7	46562.6	43858	50412.8	58751.3	48450.6	1.5736e+07	2.84459e+07	41587.8
B300510	NEG	0.704	102.056	C4 H9 N O2	N-Methylalanine	0.0495175	85.1559	level1	BMDB	C02721	HMDB0094692	Organic acids and derivatives	Amino acids, peptides, and analogues	Carboxylic acids and derivatives	Amino acids, peptides, and analogues				7.51156e+06	3.33253e+06	4.74557e+06	4.10163e+06	5.27133e+06	1.1052e+06	3.96791e+06	2.76002e+06	1.27204e+06	3.78104e+06	3.99967e+06	3.3317e+06	3.10296e+06	3.95834e+06	4.75762e+06	3.39065e+06	2.34918e+06	4.25429e+06	1.68073e+06	3.16418e+06	3.77222e+06	7.27859e+06	3.30898e+06	3.41989e+06	5.02941e+06	4.24373e+06	4.33052e+06	4.79916e+06	6.3811e+06	4.83447e+06	2.97392e+06
B300512	NEG	0.631	129.019	C5 H6 O4	Mesaconic acid	-0.0972235	80.8018	level1	BMDB	C01732	HMDB0000749	Lipids and lipid-like molecules	Fatty acids and conjugates	Fatty Acyls	Fatty acyls[FA]	Carbohydrate metabolism	Glyoxylate and dicarboxylate metabolism	map00630 Glyoxylate and dicarboxylate metabolism; map00660 C5-Branched dibasic acid metabolism; map01100 Metabolic pathways; map01120 Microbial metabolism in diverse environments; map01200 Carbon metabolism	1.01821e+06	941375	1.05781e+06	924534	1.36336e+06	1.02251e+06	1.12547e+06	916379	1.00751e+06	671455	971637	1.73641e+06	1.28078e+06	1.35331e+06	1.08352e+06	827793	1.43274e+06	741537	431645	1.33148e+06	2.0912e+06	1.12318e+06	865844	1.23527e+06	1.13484e+06	2.03835e+06	2.04936e+06	2.3692e+06	4.89766e+06	2.53364e+06	1.28847e+06
B300519	NEG	0.671	145.051	C6 H10 O4	2,3-Dimethylsuccinic acid	-0.412929	71.2762	level1	BMDB		HMDB0245405	Lipids and lipid-like molecules	Fatty acids and conjugates	Fatty Acyls	Fatty acyls[FA]				3.87464e+06	4.46873e+06	5.43915e+06	4.98646e+06	4.77245e+06	3.00227e+06	4.02605e+06	4.39796e+06	3.17433e+06	2.66915e+06	3.12675e+06	3.18371e+06	5.74124e+06	3.10818e+06	3.98696e+06	4.45416e+06	4.82749e+06	2.63572e+06	2.41891e+06	3.65833e+06	878989	1.14532e+06	860989	705549	2.72696e+06	764534	388019	440789	453600	387292	1.71498e+06
B300522	NEG	3.567	153.019	C7 H6 O4	3,5-Dihydroxybenzoic acid	-0.240152	94.5842	level1	BMDB		HMDB0013677	Benzenoids	Benzoic acids and derivatives	Benzene and substituted derivatives	Benzene and derivatives				3.2313e+06	4.08127e+06	4.28673e+06	6.11752e+06	4.7139e+06	6.04345e+06	4.3351e+06	5.02378e+06	5.46535e+06	6.18026e+06	4.13786e+06	4.2437e+06	5.83349e+06	4.56347e+06	4.34111e+06	4.12197e+06	3.61257e+06	3.24901e+06	6.05954e+06	5.58264e+06	5.76099e+06	4.98099e+06	7.09781e+06	8.39685e+06	8.41832e+06	7.62251e+06	4.88959e+06	7.31762e+06	6.19862e+06	4.53981e+06	7.01101e+06
B300525	NEG	2.948	158.082	C7 H13 N O3	2-Methylbutyrylglycine	-0.442146	90.6146	level1	BMDB		HMDB0000339	Organic acids and derivatives	Amino acids, peptides, and analogues	Carboxylic acids and derivatives	Amino acids, peptides, and analogues				7.24554e+06	6.74026e+06	5.07527e+06	3.94992e+06	5.76723e+06	5.27404e+06	7.16323e+06	4.93684e+06	5.62619e+06	7.62378e+06	4.50822e+06	6.00286e+06	3.71644e+06	7.104e+06	5.50615e+06	4.54203e+06	5.42521e+06	5.06833e+06	5.34962e+06	6.43292e+06	2.9518e+06	7.55108e+06	2.95773e+06	3.08483e+06	4.36075e+06	4.51254e+06	3.10683e+06	3.08774e+06	3.11471e+06	3.65583e+06	1.95079e+06
B300529	NEG	3.348	171.012	C7 H8 O3 S	p-Toluenesulfonic acid	-0.0428597	92.7	level1	BMDB	C06677	HMDB0059933	Benzenoids	Benzenesulfonic acids and derivatives	Benzene and substituted derivatives	Benzene and derivatives	Xenobiotics biodegradation and metabolism	Toluene degradation	map00623 Toluene degradation; map01100 Metabolic pathways; map01120 Microbial metabolism in diverse environments; map01220 Degradation of aromatic compounds	258036	404473	223195	311967	207795	295500	215577	220365	639029	258861	239877	239319	228866	232878	297151	252079	231397	375550	540039	228493	263409	327527	330068	259695	238901	371695	294453	251567	458250	558644	201078
B300534	NEG	0.624	175.025	C6 H8 O6	Ascorbic acid	-0.657135	61.9592	level1	BMDB	C01041	HMDB0000044	Organoheterocyclic compounds	Furanones	Dihydrofurans	Furanones	Carbohydrate metabolism	Ascorbate and aldarate metabolism	map00053 Ascorbate and aldarate metabolism; map01100 Metabolic pathways	310278	1.00383e+06	724247	419423	980923	806315	393183	1.29447e+06	1.40053e+06	501994	1.01359e+06	1.23977e+06	736841	708276	855666	984739	501000	823995	1.06005e+06	494970	2.36209e+06	1.27801e+06	707703	1.42374e+06	949087	1.29221e+06	970870	1.49319e+06	2.27355e+06	2.70196e+06	2.21485e+06
B300535	NEG	1.077	175.061	C7 H12 O5	2-Isopropylmalic acid	-0.560102	94.0847	level1	BMDB	C02504	HMDB0000402	Lipids and lipid-like molecules	Fatty acids and conjugates	Fatty Acyls	Fatty acyls[FA]	Amino acid metabolism	Valine, leucine and isoleucine biosynthesis	map00290 Valine, leucine and isoleucine biosynthesis; map00620 Pyruvate metabolism; map01100 Metabolic pathways; map01110 Biosynthesis of secondary metabolites; map01210 2-Oxocarboxylic acid metabolism; map01230 Biosynthesis of amino acids	1.39856e+06	2.28433e+06	747256	1.06851e+06	1.06806e+06	251190	1.51011e+06	1.7751e+06	2.33234e+06	196783	1.63411e+06	1.68623e+06	1.31812e+06	1.29141e+06	1.1367e+06	1.80272e+06	718365	1.22374e+06	294303	989793	6.68255e+06	4.78814e+06	8.87381e+06	3.52682e+06	1.72907e+06	3.85939e+06	2.88474e+06	5.27737e+06	2.16643e+06	1.47622e+07	1.82621e+06
B300542	NEG	3.367	192.067	C10 H11 N O3	Phenylacetylglycine	-0.330225	87.0815	level1	BMDB	C05598	HMDB0000821	Organic acids and derivatives	Amino acids, peptides, and analogues	Carboxylic acids and derivatives	Amino acids, peptides, and analogues	Amino acid metabolism	Phenylalanine metabolism	map00360 Phenylalanine metabolism	3.67125e+06	2.75482e+06	2.36247e+06	1.55544e+06	2.71973e+06	2.4756e+06	2.77199e+06	2.17631e+06	2.03642e+06	2.31376e+06	2.04945e+06	2.08798e+06	1.61556e+06	2.67348e+06	1.9682e+06	2.15694e+06	1.56192e+06	2.01959e+06	2.20504e+06	2.04217e+06	1.29186e+06	3.31661e+06	1.59566e+06	1.03728e+06	2.16129e+06	3.07809e+06	1.80023e+06	1.92255e+06	1.27648e+06	1.58652e+06	858512
B300546	NEG	5.171	201.023	C8 H10 O4 S	2,3-dimethylphenol sulfate	-0.671025	90.2044	level1	BMDB										124348	140735	86236.7	32759.7	31323.8	127056	116504	156352	146634	210155	36261.8	50353.7	82744.8	47095	56577.9	222752	44196.2	131938	183594	130522	156651	172642	43625.7	447094	233179	198199	147466	179615	113358	112646	212379
B300547	POS	0.759	203.139	C9 H18 N2 O3	N-Acetylisoputreanine	0.512588	84.8583	level1	BMDB		HMDB0094713	Organic acids and derivatives	Amino acids, peptides, and analogues	Carboxylic acids and derivatives	Amino acids, peptides, and analogues				1.60175e+07	1.09353e+07	9.49089e+06	9.14053e+06	1.35978e+07	1.39994e+07	1.89954e+07	1.20169e+07	1.2165e+07	1.72039e+07	6.64875e+06	1.00207e+07	9.88683e+06	1.34039e+07	1.04458e+07	1.06826e+07	9.09646e+06	1.59008e+07	7.69714e+06	1.42196e+07	2.1126e+07	1.68876e+07	1.4487e+07	2.83797e+07	2.30636e+07	5.24259e+07	4.08305e+07	1.62331e+07	1.41486e+07	9.69649e+06	1.1452e+07
B300560	POS	3.485	224.092	C11 H13 N O4	phenylacetylserine	1.48124	93.8188	level1	BMDB		HMDB0341373								3.47555e+06	2.61657e+06	2.52913e+06	1.74235e+06	2.2652e+06	3.31751e+06	2.79025e+06	2.36373e+06	3.54586e+06	3.04881e+06	1.91388e+06	2.79315e+06	2.14919e+06	2.60169e+06	2.79033e+06	2.37403e+06	2.41701e+06	2.5213e+06	2.9394e+06	2.04923e+06	9.01073e+06	9.64797e+06	1.45859e+07	2.58287e+07	1.05516e+07	1.97216e+07	8.02401e+06	9.42584e+06	3.49133e+06	3.01759e+06	5.69427e+06
B300564	POS	3.513	229.119	C10 H16 N2 O4	cyclo(leu-asp)	1.56725	67.5239	level1	BMDB										4.21288e+06	2.30306e+06	2.17356e+06	1.02533e+06	936705	1.59973e+06	2.34721e+06	1.49134e+06	1.2807e+06	2.82203e+06	1.19291e+06	812177	1.00922e+06	1.33374e+06	1.31127e+06	2.5429e+06	1.27742e+06	2.46517e+06	1.93278e+06	2.40703e+06	1.30021e+06	3.45579e+06	4.62317e+06	2.45112e+06	6.56512e+06	2.20323e+06	1.18927e+06	2.99669e+06	939171	1.53418e+06	968931
B300568	POS	4.631	232.118	C10 H17 N O5	Isovalerylglutamic acid	0.691273	87.1455	level1	BMDB		HMDB0000726	Organic acids and derivatives	Amino acids, peptides, and analogues	Carboxylic acids and derivatives	Amino acids, peptides, and analogues				3.11897e+06	2.50606e+06	2.40643e+06	1.84734e+06	2.13691e+06	2.34676e+06	2.1216e+06	2.37972e+06	3.35757e+06	2.47805e+06	1.53171e+06	2.21815e+06	1.41258e+06	2.33511e+06	1.50506e+06	1.74051e+06	1.73032e+06	1.50051e+06	1.66212e+06	1.22255e+06	1.07037e+06	1.76461e+06	2.37998e+06	1.35785e+06	3.66453e+06	1.32598e+06	600433	1.0285e+06	633769	686836	567269
B300576	POS	5.854	255.065	C15 H10 O4	Daidzein	0.241513	96.6099	level1	BMDB	C10208	HMDB0003312	Phenylpropanoids and polyketides	Isoflav-2-enes	Isoflavonoids	Flavonoids	Biosynthesis of other secondary metabolites	Isoflavonoid biosynthesis	map00943 Isoflavonoid biosynthesis; map00946 Degradation of flavonoids; map01061 Biosynthesis of phenylpropanoids; map01100 Metabolic pathways; map01110 Biosynthesis of secondary metabolites	1.25761e+07	2.16138e+07	7.68612e+06	1.2303e+07	6.04748e+06	1.63177e+07	3.21249e+07	6.84494e+06	3.48437e+07	7.56938e+06	1.89825e+07	1.35269e+07	1.51533e+07	6.73483e+06	1.28035e+07	9.85449e+06	4.54519e+06	5.84168e+06	7.23192e+06	7.84252e+06	6.55998e+06	1.08445e+07	3.0464e+07	8.56982e+07	1.09471e+07	4.63113e+07	2.68412e+07	3.16283e+07	2.54501e+07	7.5221e+06	1.88385e+07
B300580	POS	1.523	262.038	C9 H11 N O6 S	2-Methoxyacetaminophen sulfate	0.104363	90.3571	level1	BMDB		HMDB0062550	Organic acids and derivatives	Arylsulfates	Organic sulfuric acids and derivatives	Organic acids				64379.6	26581.3	35160.8	34508.8	21490.4	26042.5	28259.2	23478.3	26767.9	29463.6	20887.3	23111.4	16400.7	26009.5	21782.8	51008.4	24178.4	27250.2	19499.1	17642.9	517570	352864	281642	388753	433397	678919	509649	3.06469e+06	712439	478836	70466.5
B300582	NEG	5.028	263.128	C15 H20 O4	Abscisic acid	-1.82432	88.7864	level1	BMDB		HMDB0036093	Lipids and lipid-like molecules	Sesquiterpenoids	Prenol lipids	Terpenoids				454110	183184	529527	322068	314835	303941	422490	220330	356471	502632	124209	402161	603891	232346	68090.6	86973.2	879034	376427	164926	147824	159110	95214.6	449812	200439	227158	80652.9	104575	242984	69023.2	77824.5	102589
B300586	NEG	6.445	269.045	C15 H10 O5	Genistein	-1.87194	97.405	level1	BMDB	C06563	HMDB0003217	Phenylpropanoids and polyketides	Isoflav-2-enes	Isoflavonoids	Flavonoids	Biosynthesis of other secondary metabolites	Isoflavonoid biosynthesis	map00943 Isoflavonoid biosynthesis; map00946 Degradation of flavonoids; map01061 Biosynthesis of phenylpropanoids; map01100 Metabolic pathways; map01110 Biosynthesis of secondary metabolites	300922	322109	420364	175464	271457	913859	370942	333847	411661	376123	364460	398505	360113	279523	787587	381425	762897	162372	433940	388412	2.32169e+06	2.79516e+06	1.26784e+07	7.03778e+06	2.64611e+06	6.372e+06	2.93971e+06	6.13741e+06	5.51517e+06	1.77041e+06	1.03859e+06
B300590	POS	4.71	297.144	C14 H20 N2 O5	N-acetylpyrraline	-0.225134	92.8234	level1	BMDB										1.19766e+06	1.197e+06	1.3146e+06	1.68205e+06	1.54727e+06	1.73682e+06	1.17512e+06	1.2472e+06	1.37832e+06	1.39002e+06	1.15577e+06	1.37517e+06	1.15109e+06	1.17421e+06	1.16788e+06	1.37449e+06	1.14886e+06	1.30609e+06	1.69459e+06	1.66619e+06	999122	693439	1.02472e+06	1.87615e+06	1.76961e+06	1.05575e+06	702777	904477	449240	385634	2.32842e+06
B300611	NEG	5.688	370.133	C17 H25 N O6 S	gamma-CEHC taurine	-0.80621	95.0235	level1	BMDB										124.684	123.82	121.755	141.988	113.245	101.139	124.911	104.576	111.545	116.958	124.609	110.284	133.983	107.639	135.426	114.93	118.982	130.453	126.928	118.147	117.081	111.548	113.981	842.636	95.7833	106.715	123.29	100.237	165.271	171.49	287.09
B300620	POS	7.423	407.279	C24 H38 O5	3-dehydrocholate	-0.00728112	80.9582	level1	BMDB		HMDB0304121	Lipids and lipid-like molecules	Bile acids, alcohols and derivatives	Steroids and steroid derivatives	Bile acids, alcohols and derivatives				480255	533561	559506	458930	489265	480623	362613	664769	449440	442277	576849	580244	431111	498783	1.09687e+06	493637	1.95185e+06	434515	401295	552968	215127	292685	353594	215730	259043	246322	215777	327509	148164	211462	270337
B300637	POS	4.8	86.0965	C5 H11 N	Piperidine	1.25633	91.5458	level1	BMDB	C01746	HMDB0034301	Organoheterocyclic compounds		Piperidines	Piperidines	Biosynthesis of other secondary metabolites	Tropane, piperidine and pyridine alkaloid biosynthesis	map00960 Tropane, piperidine and pyridine alkaloid biosynthesis; map04974 Protein digestion and absorption	5.76851e+06	8.70982e+06	4.02291e+06	8.69123e+06	4.86407e+06	6.05914e+06	8.89542e+06	5.95117e+06	9.29045e+06	9.56462e+06	8.16035e+06	5.22709e+06	4.5489e+06	7.99088e+06	6.02844e+06	6.05555e+06	7.46071e+06	9.51672e+06	6.38162e+06	7.89415e+06	9.33294e+06	1.55184e+07	9.79574e+06	8.16259e+06	1.27012e+07	1.28715e+07	1.271e+07	1.16325e+07	9.46609e+06	1.30805e+07	6.69537e+06
B300643	POS	2.881	150.055	C8 H7 N O2	3-Hydroxy-2-oxoindole	1.98488	81.3502	level1	BMDB	C11130	HMDB0240741	Organoheterocyclic compounds	Indolines	Indoles and derivatives	Indole and derivatives	Biosynthesis of other secondary metabolites	Benzoxazinoid biosynthesis	map00402 Benzoxazinoid biosynthesis; map00999 Biosynthesis of various plant secondary metabolites; map01100 Metabolic pathways; map01110 Biosynthesis of secondary metabolites	1.02841e+06	1.52582e+06	1.43503e+06	1.30332e+06	1.70974e+06	1.18272e+06	1.34951e+06	1.72683e+06	1.68153e+06	1.33539e+06	938073	1.13526e+06	1.63752e+06	1.62264e+06	819615	1.57687e+06	4.78967e+06	1.36266e+06	1.95479e+06	1.00955e+06	213670	842760	1.00777e+06	945706	800356	422941	164349	583478	885572	854397	3.54477e+06
B300646	POS	2.826	151.062	C6 H6 N4 O	1-Methylhypoxanthine	2.27881	83.0958	level1	BMDB		HMDB0013141	Organoheterocyclic compounds	Purines and purine derivatives	Imidazopyrimidines	Purines and derivatives				2.52661e+06	3.37087e+06	2.78097e+06	2.18334e+06	5.26161e+06	2.63845e+06	3.59797e+06	3.40476e+06	3.09864e+06	3.86084e+06	3.36244e+06	4.6944e+06	4.37522e+06	5.04039e+06	4.68736e+06	2.3608e+06	4.19393e+06	2.43098e+06	2.36445e+06	2.15018e+06	2.80397e+06	1.8876e+06	7.12133e+06	1.03322e+06	5.22895e+06	5.2155e+06	6.14329e+06	8.78421e+06	5.00976e+06	6.36556e+06	761434
B300649	POS	3.651	172.097	C8 H13 N O3	trans-2-hexenoylglycine	1.54133	82.7311	level1	BMDB										1.6585e+06	1.44227e+06	1.69844e+06	5.20031e+06	1.79651e+06	2.03589e+06	1.46653e+06	1.55824e+06	3.34021e+06	1.31836e+06	1.71153e+06	1.59705e+06	1.58523e+06	1.8649e+06	1.86347e+06	2.07009e+06	1.88205e+06	2.20902e+06	1.88838e+06	3.91917e+06	846805	1.00624e+06	1.18403e+06	834089	1.20398e+06	1.42947e+06	694402	647427	1.07836e+06	956360	1.24873e+06
B300656	POS	3.809	197.129	C10 H16 N2 O2	Cyclo(L-prolyl-L-valyl)	1.80014	91.8807	level1	BMDB		HMDB0240493	Organic acids and derivatives	Amino acids, peptides, and analogues	Carboxylic acids and derivatives	Amino acids, peptides, and analogues				725875	656702	1.22105e+06	929183	764093	2.51512e+06	1.27867e+06	668485	840239	1.50031e+06	652730	642557	696479	691743	620523	649824	940957	654262	808707	1.59898e+06	7.9491e+06	6.99357e+06	8.59789e+06	7.6667e+06	7.9451e+06	5.43797e+06	3.66787e+06	4.89009e+06	4.14285e+06	3.77874e+06	1.22185e+07
B300663	POS	3.686	231.134	C10 H18 N2 O4	DI-Acetyl-lysine	0.850363	78.2262	level1	BMDB										2.89887e+06	3.0849e+06	1.43695e+06	1.50702e+06	745935	2.95044e+06	2.74217e+06	2.70919e+06	2.37051e+06	2.0494e+06	826695	1.15756e+06	1.05405e+06	1.69237e+06	934049	3.35546e+06	1.13022e+06	1.42072e+06	3.25704e+06	2.11965e+06	2.26793e+06	3.30258e+06	4.51592e+06	2.90482e+06	6.11258e+06	3.32611e+06	3.6386e+06	4.71231e+06	1.9014e+06	1.89636e+06	1.75736e+06
B300664	POS	3.686	231.17	C11 H22 N2 O3	Valylleucine	0.643762	90.6083	level1	BMDB		HMDB0029131	Organic acids and derivatives	Amino acids, peptides, and analogues	Carboxylic acids and derivatives	Amino acids, peptides, and analogues				3.88657e+06	3.10738e+06	3.73685e+06	4.55077e+06	4.0215e+06	1.80304e+06	4.20425e+06	5.16223e+06	3.72537e+06	4.51689e+06	2.02794e+06	2.05384e+06	1.42629e+06	1.59028e+06	2.08093e+06	2.65042e+06	2.83059e+06	1.94731e+06	1.58781e+06	963694	1.68324e+07	7.90258e+06	1.93071e+07	1.32815e+07	1.4579e+07	1.85404e+07	5.25279e+06	2.30387e+07	3.96897e+06	3.84625e+06	4.61398e+06
B300668	POS	2.206	254.161	C11 H19 N5 O2	cyclo(pro-arg)	0.288225	87.2907	level1	BMDB										185904	45602.4	24723.3	55025.9	271303	612436	524319	398915	499996	1.05545e+06	277548	348230	199132	277493	177217	876712	21561.4	735513	1.15119e+06	703047	23073.2	25186.5	35773.2	39258	117505	35588	38615.5	104814	27033.6	31522.4	16599.9
B300685	POS	5.238	203.118	C12 H14 N2 O	N-Acetyltryptamine	1.69018	93.6752	level1	BMDB	C00977	HMDB0255077	Organoheterocyclic compounds	Indoles	Indoles and derivatives	Indoles				1.43555e+07	1.52371e+07	6.65474e+06	6.73095e+06	7.89771e+06	1.33541e+07	7.02483e+06	9.42085e+06	5.35582e+06	8.71329e+06	9.97272e+06	1.37942e+07	1.24422e+07	1.37874e+07	1.31444e+07	1.11211e+07	1.53436e+07	9.07945e+06	8.53249e+06	9.39699e+06	95832.5	96809.7	83654.2	75346.7	103253	93546.2	148622	57663.8	145600	80824	460767
B300692	POS	4.9	247.108	C13 H14 N2 O3	N-acetyltryptophan	0.360895	96.6338	level1	BMDB	C00978	HMDB0013713	Organic acids and derivatives	Amino acids, peptides, and analogues	Carboxylic acids and derivatives	Amino acids, peptides, and analogues	Amino acid metabolism	Tryptophan metabolism	map00380 Tryptophan metabolism; map01100 Metabolic pathways; map01110 Biosynthesis of secondary metabolites	1.28011e+06	1.21606e+06	753874	585315	671470	994525	1.16985e+06	1.02965e+06	1.87426e+06	1.54926e+06	689316	1.08638e+06	874281	995229	885417	930915	555392	936659	1.3414e+06	727118	2.50519e+06	2.23522e+06	1.827e+06	6.01306e+06	2.39179e+06	5.96902e+06	2.59247e+06	2.98373e+06	1.21796e+06	884141	1.45438e+06
B300699	POS	4.385	220.133	C13 H17 N O2	Ritalinic acid	0.941041	95.174	level1	BMDB	C02774	HMDB0042008	Organic nitrogen compounds	Amines	Organonitrogen compounds	Amines				1.67617e+07	1.78788e+07	1.32952e+07	1.4105e+07	2.43051e+07	3.83382e+07	2.24394e+07	2.00548e+07	1.71213e+07	1.7906e+07	2.63785e+07	2.62127e+07	1.4973e+07	3.17018e+07	1.9454e+07	2.0203e+07	1.51372e+07	2.39514e+07	1.00344e+07	3.71573e+07	520515	563457	453116	156731	392581	5.54288e+06	1.29498e+07	6.20227e+06	2.65928e+06	1.13359e+07	1.08329e+07
B300705	NEG	9.41	299.259	C18 H36 O3	12-hydroxystearic acid	-1.22862	91.6168	level1	BMDB	C05660	HMDB0061706	Lipids and lipid-like molecules	Fatty acids and conjugates	Fatty Acyls	Fatty acyls[FA]	Amino acid metabolism	Tryptophan metabolism	map00380 Tryptophan metabolism	1.477e+07	1.31533e+07	1.38331e+07	7.86211e+06	2.14722e+07	1.89331e+07	2.62775e+07	9.4004e+06	6.20458e+06	1.07169e+07	4.06192e+07	1.58088e+07	8.01517e+06	3.99552e+07	1.07263e+07	8.51317e+06	1.97631e+07	4.19388e+06	6.43663e+06	5.67337e+06	1.5521e+08	1.42374e+08	1.82757e+08	1.159e+08	1.62765e+08	1.45245e+08	2.27093e+08	1.65961e+08	6.30668e+08	8.71139e+08	9.88265e+07
B300707	NEG	5.883	202.051	C11 H9 N O3	Indolepyruvate	-0.553159	93.8384	level1	BMDB	C00331	HMDB0060484	Organoheterocyclic compounds	Indolyl carboxylic acids and derivatives	Indoles and derivatives	Indole and derivatives	Amino acid metabolism	Tryptophan metabolism	map00380 Tryptophan metabolism; map01100 Metabolic pathways	1.48039e+06	1.40049e+06	934571	1.14463e+06	1.0946e+06	1.02568e+06	1.04754e+06	1.18451e+06	1.36789e+06	1.34898e+06	1.12981e+06	1.35594e+06	854970	1.36773e+06	1.01977e+06	1.13657e+06	447533	1.10386e+06	836085	983519	4.16679e+06	3.91726e+06	2.9904e+06	1.85101e+06	4.53438e+06	7.43766e+06	2.79435e+06	2.8726e+06	2.7411e+06	4.4737e+06	877062
B300710	POS	1.274	150.078	C6 H7 N5	6-Methyladenine	1.90807	82.0086	level1	BMDB	C08434	HMDB0002099	Organoheterocyclic compounds	Purines and purine derivatives	Imidazopyrimidines	Purines and derivatives				7.15948e+06	3.59139e+06	3.73505e+06	3.99701e+06	2.38323e+06	7.96603e+06	4.83324e+06	3.35847e+06	3.69948e+06	1.92606e+06	2.33662e+06	3.63584e+06	3.27062e+06	4.16361e+06	1.96501e+06	3.81047e+06	3.80081e+06	2.0893e+06	5.05316e+06	3.9013e+06	1.38165e+06	131488	339553	2.19371e+06	1.15972e+06	853439	979139	1.03093e+06	1.41193e+06	291288	2.82533e+06
B300721	NEG	0.615	205.035	C7 H10 O7	2-Methylcitric acid	-1.00805	69.7865	level1	BMDB	C06805	HMDB0000379	Organic acids and derivatives	Tricarboxylic acids and derivatives	Carboxylic acids and derivatives	Organic acids				2.16538e+06	5.89161e+06	2.27137e+06	3.15718e+06	2.04883e+06	2.36785e+06	2.58963e+06	4.56085e+06	5.33791e+06	1.84988e+06	3.81561e+06	4.07848e+06	3.6652e+06	2.07847e+06	2.79015e+06	2.7598e+06	1.78292e+06	2.62801e+06	2.99927e+06	3.63363e+06	3.95461e+06	4.09293e+06	2.07063e+06	2.6274e+06	3.10932e+06	3.19025e+06	2.22637e+06	2.71127e+06	1.32184e+06	840167	2.32211e+06
B300728	POS	6.756	284.128	C17 H17 N O3	N-Phenylacetylphenylalanine	-0.0607964	92.5797	level1	BMDB	C01598	HMDB0002372	Organic acids and derivatives	Amino acids, peptides, and analogues	Carboxylic acids and derivatives	Amino acids, peptides, and analogues	Amino acid metabolism	Tryptophan metabolism	map00380 Tryptophan metabolism; map01100 Metabolic pathways; map01110 Biosynthesis of secondary metabolites; map04080 Neuroactive ligand-receptor interaction; map04713 Circadian entrainment	1.425e+06	1.2983e+06	857628	807774	840092	757194	833418	807690	1.0308e+06	1.26334e+06	554801	844148	324069	1.22405e+06	772385	637553	478013	395920	550477	488164	1.09451e+06	1.76793e+06	2.13074e+06	537119	1.35829e+06	2.28758e+06	867044	978568	493942	517801	608892
B300730	NEG	3.423	130.066	C9 H9 N	3-Methylindole	0.0583311	85.7324	level1	BMDB	C08313	HMDB0000466	Organoheterocyclic compounds	Indoles	Indoles and derivatives	Indoles	Amino acid metabolism	Tryptophan metabolism	map00380 Tryptophan metabolism	555548	898243	549213	892284	430550	607963	532858	377078	477010	667718	366269	622304	413352	480062	562631	643885	493000	612558	498750	420272	1.56702e+06	1.14059e+06	1.32643e+06	1.72726e+06	1.5508e+06	1.02095e+06	641556	1.0276e+06	688973	338745	705053
B300757	POS	8.305	345.242	C22 H32 O3	Medroxyprogesterone	-0.0173712	84.6055	level1	BMDB	C07119	HMDB0001939	Lipids and lipid-like molecules	Pregnane steroids	Steroids and steroid derivatives	Steroids and derivatives				473209	94195.4	631026	441604	418604	98607.5	29978.1	257050	1.07423e+06	60171.4	926784	96860.2	1.31681e+06	249318	1.13337e+06	71360	461646	336804	390791	871664	27400.5	170755	28935.9	221962	56254.7	120608	1.44772e+06	2.66966e+06	1.40619e+06	3.61153e+06	28430.1
B300760	POS	5.516	445.161	C22 H24 N2 O8	Doxycycline	0.349943	93.6459	level1	BMDB	C06973	HMDB0014399	Phenylpropanoids and polyketides		Tetracyclines	Polyketides[PK]				1261.67	1116.33	1288.02	1463.84	1140.4	1287.7	1232.86	1487.02	1252.18	1194.64	1206.89	1449.01	1234.8	1245.71	1193.87	1228.14	1347.66	1233.42	1400.37	1130.49	1020.97	837.634	1288.18	960.055	1008.26	1140.17	962.648	985.441	1093	1137.79	95294.9
B300773	POS	4.052	332.14	C17 H18 F N3 O3	Ciprofloxacin	-0.108315	93.5795	level1	BMDB	C05349	HMDB0014677	Organoheterocyclic compounds	Quinoline carboxylic acids	Quinolines and derivatives	Quinoline carboxylic acids			map02010 ABC transporters	711.568	489.271	447.653	552.474	580.707	138.386	567.957	181.293	120.492	225.805	776.824	442.344	1269.49	517.274	581.464	732.404	826.176	488.698	282.002	260.345	465.187	2214.07	391.038	311.657	125.205	296.596	1365	151.378	1741.49	1617.54	1578.64
B300790	POS	0.7	141.066	C6 H8 N2 O2	Methylimidazoleacetic acid	0.643511	95.1378	level1	BMDB	C05828	HMDB0002820	Organoheterocyclic compounds	Imidazoles	Azoles	Imidazoles	Amino acid metabolism	Histidine metabolism	map00340 Histidine metabolism; map01100 Metabolic pathways	3.58077e+07	3.58058e+07	1.12629e+07	1.10339e+07	2.97077e+07	1.21195e+07	1.19392e+07	9.79243e+06	1.14063e+07	1.26507e+07	3.16348e+07	7.15884e+06	1.02989e+07	3.75337e+06	1.20234e+07	4.73086e+07	1.10623e+08	1.12114e+07	1.92677e+07	1.80523e+07	4.14366e+07	5.00758e+07	5.10165e+07	3.81716e+07	3.25195e+07	5.62581e+07	3.97483e+07	2.54205e+07	8.12374e+07	5.94888e+07	7.51519e+07
B300820	POS	0.687	203.15	C8 H18 N4 O2	Symmetric dimethylarginine	0.196893	83.257	level1	BMDB		HMDB0003334	Organic acids and derivatives	Amino acids, peptides, and analogues	Carboxylic acids and derivatives	Amino acids, peptides, and analogues				1.07438e+07	1.04426e+07	4.38117e+06	1.07192e+07	9.35014e+06	1.48163e+07	1.07261e+07	3.57843e+06	1.3148e+07	3.37386e+06	3.64419e+06	4.19113e+06	3.08727e+06	5.06384e+06	5.9855e+06	2.92428e+06	5.13494e+06	5.24578e+06	5.7382e+06	2.1923e+06	5.01796e+07	4.17146e+07	2.84649e+07	1.58767e+07	4.97776e+07	3.87497e+07	5.58169e+07	6.45466e+07	7.28881e+07	2.42206e+07	2.09612e+07
B300824	POS	3.071	189.124	C8 H16 N2 O3	Leucyl-Glycine	2.41117	92.107	level1	BMDB		HMDB0028929	Organic acids and derivatives	Amino acids, peptides, and analogues	Carboxylic acids and derivatives	Amino acids, peptides, and analogues				5.48985e+06	1.94765e+06	1.85723e+06	2.00429e+06	1.44369e+06	4.97963e+06	3.14651e+06	1.43062e+06	4.72839e+06	3.15733e+06	2.45713e+06	2.32398e+06	1.33755e+06	2.33102e+06	1.96053e+06	3.08283e+06	2.75464e+06	2.14931e+06	3.77971e+06	2.46705e+06	1.0447e+07	5.82932e+06	1.44113e+07	7.30206e+06	1.23649e+07	1.38195e+07	6.75436e+06	4.31951e+07	1.12394e+07	9.21354e+06	2.01969e+06
B300837	POS	0.73	154.098	C7 H11 N3 O	N-Acetylhistamine	-1.4273	93.1298	level1	BMDB	C05135	HMDB0013253	Organic acids and derivatives	Carboxylic acid derivatives	Carboxylic acids and derivatives	Organic acids	Amino acid metabolism	Histidine metabolism	map00340 Histidine metabolism	1.42498e+06	1.07105e+07	2.57146e+06	1.25953e+06	1.52553e+06	2.36073e+06	2.6491e+06	3.62717e+06	2.60956e+06	1.94654e+06	1.47255e+06	2.04018e+06	2.07288e+06	4.64087e+06	1.37669e+06	1.93792e+06	2.23105e+06	3.06345e+06	6.58923e+06	1.47952e+06	1.84417e+06	4.35072e+06	5.36109e+06	1.8232e+06	2.59242e+06	6.20992e+06	4.608e+06	5.45271e+06	2.43879e+06	1.65484e+06	1.2114e+06
B300858	POS	5.3	115.076	C6 H10 O2	Gamma-Caprolactone	1.72104	95.554	level1	BMDB		HMDB0003843	Organoheterocyclic compounds	Gamma butyrolactones	Lactones	Gamma butyrolactones				965167	648249	617174	929464	1.4788e+06	437406	1.53078e+06	1.4672e+06	1.5756e+06	2.02121e+06	1.35073e+06	511535	1.148e+06	574658	654126	715737	361036	1.66533e+06	1.84316e+06	2.6474e+06	2.2387e+07	1.05009e+07	4.65684e+06	1.49677e+07	9.45699e+06	6.50903e+06	7.48445e+06	1.88367e+06	8.59902e+06	7.36603e+06	1.52943e+07
0.581_228.13420	POS	0.581	228.134	C13 H19 N O	NP-022512	107144	78.8669	level2	mzCloud										148978	831725	442284	167852	559947	1.10432e+06	398171	959645	302180	240861	130280	549007	141032	3.1708e+06	224922	143830	3.14075e+06	142297	1.33543e+06	119857	425264	172194	128915	113052	95580.9	1.18703e+06	5.5991e+06	2.11303e+06	8.1239e+06	887741	3.93913e+06
0.592_244.12896	POS	0.592	244.129	C13 H19 N O2	7-(2-aminophenyl)heptanoic acid	99393.8	64.6961	level2	mzCloud										428302	1.5375e+06	1.8158e+06	215959	682488	996960	608711	1.04938e+06	340575	170903	168333	377902	328269	2.54659e+06	197780	446814	2.91236e+06	581676	3.09307e+06	267373	321046	174166	158279	154380	109559	251066	897025	554382	3.29435e+06	291481	1.05115e+06
0.647_162.07584	POS	0.647	162.076	C7 H7 N5	7-methylpyrimido[4,5-d]pyrimidin-4-amine	-10.7503	65.0948	level2	mzCloud										2.9891e+06	3.00918e+06	1.76279e+06	3.38e+06	2.63205e+06	7.87183e+06	3.34126e+06	4.72047e+06	9.36784e+06	9.94889e+06	1.92451e+06	4.55942e+06	2.44715e+06	3.40626e+06	3.35787e+06	3.95598e+06	4.13583e+06	3.02316e+06	6.4116e+06	2.25943e+06	7.26698e+06	6.06748e+06	8.17584e+06	1.60297e+07	7.2547e+06	1.31242e+07	8.00606e+06	9.43789e+06	7.36437e+06	1.06224e+07	4.11125e+06
0.678_243.13366	POS	0.678	243.134	C11 H18 N2 O4	NP-020439	-0.905384	62.3596	level2	mzCloud										2.3271e+06	1.75951e+06	2.21521e+06	2.93611e+06	2.17347e+06	2.71209e+06	2.6302e+06	2.59814e+06	2.71831e+06	2.05474e+06	2.83583e+06	2.49647e+06	3.29221e+06	2.27498e+06	2.78298e+06	1.73763e+06	1.8084e+06	2.76727e+06	2.27695e+06	2.09048e+06	8.7126e+06	272001	494853	260613	1.20696e+06	931880	331751	769694	849819	994880	405625
0.695_262.13935	POS	0.695	262.139	C13 H21 N O3	Levalbuterol	91908.9	73.0052	level2	mzCloud										929525	727123	810137	685649	842760	1.54194e+06	1.20851e+06	1.34613e+06	646866	738260	621841	865686	796628	753392	679313	991509	932791	861622	770245	964919	1.01554e+06	956274	3.80349e+06	1.13952e+06	1.06514e+06	1.31384e+06	817149	2.89743e+06	1.0204e+06	1.12124e+06	672573
0.699_146.08105	POS	0.699	146.081	C6 H13 N O4	NP-022231	-110438	61.8351	level2	mzCloud										8.83758e+06	5.92392e+06	8.44457e+06	2.38354e+06	6.18272e+06	9.54479e+06	7.73056e+06	6.06648e+06	9.60888e+06	1.58636e+07	9.90565e+06	8.27146e+06	4.39216e+06	2.48213e+06	8.77353e+06	6.32377e+06	1.06775e+07	3.52631e+06	2.41733e+06	7.12463e+06	1.50212e+07	1.59802e+07	2.51334e+07	9.99987e+06	1.77801e+07	1.41273e+07	1.42077e+07	1.87591e+07	3.70054e+07	5.45431e+07	1.04673e+07
0.703_196.06021	POS	0.703	196.06	C9 H9 N O4	6-methyl-7-nitro-2,3-dihydro-1,4-benzodioxine	-1.14388	62.5645	level2	mzCloud										209636	148026	114147	117833	156726	167871	200566	166465	202784	168120	106652	160172	115381	130063	129652	145294	92134.9	146227	114363	135904	199414	160697	160705	144294	195525	210365	196698	214730	292033	288872	119591
0.717_337.16000	POS	0.717	337.16	C16 H26 O6	(2R,3R,4S,5S,6R)-2-{[(2E)-4-ethenyl-2,5-dimethylhexa-2,5-dien-1-yl]oxy}-6-(hydroxymethyl)oxane-3,4,5-triol	69960.8	63.0192	level2	mzCloud										2.41811e+07	1.22565e+07	5.38407e+06	8.74462e+06	9.75171e+06	1.72344e+07	1.75721e+07	1.7833e+07	1.99488e+07	1.18694e+07	9.43871e+06	1.12732e+07	6.05511e+06	8.80675e+06	1.05666e+07	1.26521e+07	4.04196e+06	9.94788e+06	6.71013e+06	1.15233e+07	1.82795e+07	4.54707e+06	5.25049e+06	8.43908e+06	1.14733e+07	1.31507e+07	1.2533e+07	1.25719e+07	1.83837e+07	2.01762e+07	8.40056e+06
0.729_202.15460	POS	0.729	202.155	C18 H38 N6 O4	KKK	-500001	63.3768	level2	mzCloud										475102	628323	768955	563344	860856	1.19871e+06	1.10385e+06	727657	1.17315e+06	1.86578e+06	273630	201654	292365	685737	562538	394978	345256	730358	232413	556343	110112	77907	131127	77760.2	104009	262207	238192	106817	112457	132329	175884
0.73_196.07253	NEG	0.73	196.073	C8 H11 N3 O3	5-morpholino-2,4(1H,3H)-pyrimidinedione	-1.43999	65.8998	level2	mzCloud										609369	719759	547785	502122	579716	726463	1.09132e+06	936284	744094	891544	400955	476577	595696	580241	551046	541323	712519	638417	549284	564096	699761	393617	486715	991628	1.24749e+06	964509	600402	521296	851611	260865	811716
0.731_176.07157	NEG	0.731	176.072	C10 H11 N O2	1,2,3,4-Tetrahydro-3-isoquinolinecarboxylic acid	-0.764031	65.264	level2	mzCloud										1.73995e+06	2.3137e+06	3.0483e+06	2.21123e+06	2.75583e+06	2.09619e+06	1.74499e+06	1.93491e+06	961684	3.10841e+06	1.66051e+06	1.93873e+06	1.2138e+06	1.93432e+06	2.33087e+06	3.13306e+06	844906	2.93341e+06	1.14115e+06	2.89481e+06	8.13137e+06	2.31575e+07	8.96566e+06	5.52295e+06	1.50726e+07	7.02834e+06	4.82519e+06	7.27458e+06	355977	765438	195994
0.731_244.11178	POS	0.731	244.112	C18 H13 N	4-(9H-fluoren-9-yl)pyridine	-1.21339	60.3797	level2	mzCloud										2.7817e+07	1.06299e+07	1.74737e+07	9.831e+06	1.24956e+07	1.85204e+07	7.61238e+06	6.62048e+06	8.98049e+06	1.21313e+07	7.45031e+06	1.28581e+07	5.22598e+06	4.24365e+06	7.54342e+06	1.53428e+07	1.2257e+07	2.06493e+07	4.79949e+06	9.27367e+06	8.85405e+06	5.82538e+06	1.05278e+07	7.98583e+06	1.32074e+07	1.21425e+07	5.21935e+06	1.7926e+07	1.08788e+07	1.27971e+07	6.76685e+06
0.733_422.10545	POS	0.733	422.105	C21 H16 F3 N3 O2	N1-imino(phenyl)methyl-3-{[2-oxo-5-(trifluoromethyl)-1,2-dihydropyridin-1-yl]methyl}benzamide	55068	87.7871	level2	mzCloud										3.43043e+06	3.06249e+06	1.40903e+06	2.18253e+06	1.59631e+06	3.84693e+06	1.46176e+06	3.44401e+06	4.32933e+06	1.01977e+06	2.36547e+06	2.52761e+06	2.00168e+06	2.45325e+06	2.43857e+06	4.02884e+06	1.72309e+06	4.01744e+06	2.25353e+06	2.54099e+06	7.41856e+06	3.4418e+06	3.60263e+06	6.37124e+06	4.41893e+06	4.15296e+06	4.94354e+06	5.70264e+06	8.09365e+06	9.46228e+06	4.79308e+06
0.735_198.07621	POS	0.735	198.076	C9 H8 O4	NP-021030	94570.2	77.5712	level2	mzCloud										985310	1.83046e+06	2.15912e+06	2.90936e+06	2.43567e+06	2.69973e+06	2.3813e+06	4.23042e+06	2.7455e+06	1.49643e+06	1.90388e+06	3.45516e+06	3.1112e+06	2.7948e+06	2.21766e+06	1.59704e+06	2.53365e+06	3.63465e+06	3.13969e+06	792223	1.76146e+06	819501	1.07952e+06	1.7683e+06	1.86137e+06	438361	687855	270094	1.04165e+06	1.26063e+06	1.95378e+06
0.735_214.08237	POS	0.735	214.082	C8 H11 N3 O4	2-{2-[(1-methyl-1H-pyrazol-5-yl)amino]-2-oxoethoxy}acetic acid	0.87371	82.5351	level2	mzCloud										1.08038e+06	1.35082e+06	3.80627e+06	2.63474e+06	9.01302e+06	1.35316e+06	3.16344e+06	1.66166e+06	1.47565e+06	2.99749e+06	2.85805e+06	5.00474e+06	9.17469e+06	5.18141e+06	1.68068e+06	1.53187e+06	5.17241e+06	4.62921e+06	2.30534e+06	698459	1.17385e+07	1.44228e+06	4.84164e+06	2.00992e+06	1.33389e+07	3.00594e+06	2.31404e+06	1.31867e+07	2.02549e+07	2.39809e+07	5.56614e+06
0.736_153.10236	POS	0.736	153.102	C8 H12 N2 O	3-hydroxyquinuclidine-3-carbonitrile hydrochloride	0.81712	61.8034	level2	mzCloud										7.81951e+06	5.74962e+06	6.80718e+06	5.37159e+06	6.71641e+06	8.13487e+06	5.33807e+06	5.01241e+06	6.17677e+06	1.00837e+07	8.63295e+06	6.61266e+06	6.10857e+06	7.88055e+06	5.84366e+06	3.93634e+06	5.30384e+06	6.01359e+06	5.59864e+06	5.7291e+06	1.05616e+06	1.81589e+06	776054	1.17955e+06	1.43098e+06	2.70504e+06	4.4687e+06	2.07731e+06	4.00305e+06	4.45588e+06	4.77291e+06
0.742_262.12797	POS	0.742	262.128	C11 H19 N O6	NP-015114	-2.04813	74.8882	level2	mzCloud										4.34205e+06	1.05649e+07	7.19624e+06	9.34177e+06	1.29284e+07	2.34698e+07	1.06675e+07	1.73128e+07	1.80357e+07	2.64191e+07	8.82509e+06	6.45591e+06	1.42762e+07	6.76967e+06	9.44936e+06	1.1124e+07	1.23469e+07	1.20768e+07	6.53714e+06	9.00087e+06	1.26828e+07	3.20504e+07	7.06108e+07	6.92988e+07	3.75524e+07	8.09754e+07	3.16224e+07	3.03645e+07	3.09991e+07	3.05422e+07	1.74642e+07
0.747_198.08488	POS	0.747	198.085	C8 H11 N3 O3	ethyl 3-oxo-3-(1H-pyrazol-5-ylamino)propanoate	-12.3553	60.4332	level2	mzCloud										137339	253622	31895.1	119477	55624.2	38786.8	45826.8	40058.5	201849	165539	108526	78712.6	49467.2	1.08855e+06	145711	49941	70700.2	58944	289868	52850.8	2.34622e+06	3.76349e+06	2.17408e+06	835702	2.03565e+06	3.90046e+06	3.87263e+06	2.47903e+06	5.09273e+06	4.61112e+06	306431
0.759_169.09735	POS	0.759	169.097	C8 H12 N2 O2	1,3-diazaspiro[4.5]decane-2,4-dione	1.07522	71.4364	level2	mzCloud										4.71732e+06	2.6968e+06	2.57391e+06	3.85837e+06	4.22554e+06	4.3608e+06	4.89238e+06	3.07509e+06	4.31008e+06	5.32689e+06	3.38716e+06	4.61461e+06	1.12194e+07	4.2518e+06	3.42695e+06	2.967e+06	6.22045e+06	7.40629e+06	5.10757e+06	3.1156e+06	3.79047e+06	7.11139e+06	3.34093e+06	7.09462e+06	5.08946e+06	7.02334e+06	9.29244e+06	8.00638e+06	1.45286e+07	3.24998e+07	7.06256e+06
0.759_214.10743	POS	0.759	214.107	C10 H12 O4	NP-012042	86837.8	82.4462	level2	mzCloud										3.75118e+06	2.09839e+06	2.08189e+06	988970	2.3187e+06	3.24194e+06	1.80589e+06	1.50678e+06	1.9764e+06	2.24642e+06	3.56644e+06	2.92111e+06	2.50911e+06	5.27678e+06	2.85415e+06	2.57477e+06	3.60329e+06	2.03507e+06	2.09108e+06	1.23948e+06	5.41047e+06	4.52522e+06	5.66252e+06	2.85484e+06	3.34997e+06	1.94165e+06	862986	3.13981e+06	4.58088e+06	5.22707e+06	3.52652e+06
0.764_198.11259	POS	0.764	198.113	C10 H15 N O3	NP-003800	0.499447	75.6434	level2	mzCloud										4.08187e+06	3.40808e+06	2.07028e+06	2.24511e+06	4.73566e+06	3.83829e+06	5.07731e+06	3.50266e+06	2.39966e+06	5.59518e+06	5.42487e+06	4.82137e+06	3.39647e+06	1.82922e+06	6.53333e+06	3.75934e+06	2.88468e+06	4.64278e+06	3.08011e+06	6.14865e+06	4.18772e+06	2.79243e+06	2.37337e+06	1.01329e+06	5.32901e+06	3.03625e+06	5.21876e+06	5.13575e+06	2.48066e+06	4.02953e+06	1.67355e+06
0.769_223.14413	POS	0.769	223.144	C12 H18 N2 O2	4-(pentyloxy)benzene-1-carbohydrazide	0.0325928	65.1784	level2	mzCloud										8.66355e+06	9.04846e+06	9.94376e+06	1.3038e+07	1.12896e+07	1.04339e+07	1.01041e+07	2.92325e+06	8.72871e+06	1.01876e+07	9.92262e+06	8.81782e+06	8.19954e+06	8.90522e+06	1.02374e+07	9.69417e+06	1.14239e+07	1.26149e+07	8.10535e+06	1.13134e+07	1.24054e+06	1.54619e+06	584884	840853	802450	3.17317e+06	4.6427e+06	2.79975e+06	4.60949e+06	6.81679e+06	3.7452e+06
0.777_137.10746	POS	0.777	137.107	C8 H12 N2	Tetramethylpyrazine	0.998454	72.3666	level2	mzCloud										5.59559e+06	4.91216e+06	4.5958e+06	7.67109e+06	5.11289e+06	5.87256e+06	4.5537e+06	3.82518e+06	2.75063e+06	9.26125e+06	5.37587e+06	5.43143e+06	1.01172e+07	5.97245e+06	5.86493e+06	5.11193e+06	6.16882e+06	1.0339e+07	3.22244e+06	5.50179e+06	1.57433e+06	1.60388e+06	1.37134e+06	2.06321e+06	2.08433e+06	2.99369e+06	1.2582e+07	3.95558e+06	4.89826e+06	6.15315e+06	4.88802e+06
0.781_79.02127	POS	0.781	79.0213	C2 H6 O S	2-Mercaptoethanol	0.742515	88.6242	level2	mzCloud										8.83859e+07	8.21585e+07	7.64312e+07	7.26548e+07	1.69801e+07	3.98295e+07	6.47931e+07	4.39559e+07	5.96721e+07	8.40591e+07	4.83981e+07	5.63281e+07	4.35659e+07	4.53931e+07	8.73811e+07	3.8821e+07	5.48155e+07	7.42693e+07	9.76512e+07	2.77204e+07	2.41386e+07	4.81575e+07	6.75901e+07	1.17957e+08	5.05665e+07	1.27415e+08	1.18409e+08	1.44468e+08	1.3928e+08	7.4324e+07	9.28739e+06
0.785_314.12302	POS	0.785	314.123	C15 H15 N5 O3	(3-nitrophenyl)(4-pyrimidin-2-ylpiperazino)methanone	-5.58324	76.0483	level2	mzCloud										2.57364e+06	424644	548692	326433	1.35377e+06	948946	300154	310456	436068	814469	687333	1.02274e+06	651286	788654	1.05881e+06	383252	2.4985e+06	760234	831295	95292.2	1.42538e+07	1.34794e+07	9.59679e+06	9.83652e+06	7.34388e+06	1.40632e+07	9.04353e+06	7.95884e+06	1.43696e+07	9.43278e+06	6.63283e+06
0.814_341.05992	NEG	0.814	341.06	C15 H13 F3 N2 O2 S	2-[(1-naphthylmethyl)thio]-N'-(2,2,2-trifluoroacetyl)acetohydrazide	6.45867	70.1656	level2	mzCloud										3.653e+06	8.24296e+06	7.74264e+06	6.34833e+06	1.08697e+07	3.12133e+06	6.33476e+06	6.54417e+06	1.85405e+06	2.56283e+06	9.92958e+06	5.7195e+06	1.13481e+07	5.38204e+06	1.0887e+07	5.76271e+06	1.01473e+07	1.01733e+07	3.89543e+06	8.86007e+06	2.08353e+06	6.71621e+06	1.41925e+06	2.51059e+06	987850	1.53804e+06	2.55709e+06	1.69842e+06	1.13427e+06	1.44284e+06	5.04691e+06
1.043_279.13388	POS	1.043	279.134	C14 H18 N2 O4	N-{4-[(2R,3R)-3-(Hydroxymethyl)-4-methyl-5-oxo-2-morpholinyl]phenyl}acetamide	-0.190398	66.364	level2	mzCloud										1.36089e+07	1.71652e+07	8.01775e+06	1.59717e+06	6.76196e+06	5.33546e+07	1.42894e+07	2.95085e+07	3.2547e+07	6.96145e+07	7.39198e+06	1.23034e+07	5.55436e+06	1.68089e+07	1.62655e+07	1.54348e+07	9.89221e+06	1.08278e+07	3.01764e+07	4.79426e+06	5.6328e+07	1.04233e+08	1.59317e+08	2.30342e+08	1.60006e+08	2.91802e+08	9.6592e+07	1.09934e+08	1.04525e+08	9.81563e+07	4.55518e+07
1.084_188.09205	POS	1.084	188.092	C8 H13 N O4	NP-019722	1.69904	78.1498	level2	mzCloud										7.04687e+07	8.37653e+07	1.41959e+08	1.00336e+08	1.39444e+08	4.58435e+07	4.16175e+07	4.69414e+07	2.98524e+07	9.18222e+07	6.8489e+07	5.80832e+07	4.57953e+07	8.92233e+07	8.62848e+07	7.71013e+07	3.55236e+07	6.65867e+07	3.18782e+07	7.21401e+07	2.88565e+08	5.55583e+08	1.22984e+08	1.10973e+08	3.81639e+08	3.50054e+08	3.36922e+08	6.89691e+08	1.16018e+08	1.97009e+08	2.32605e+07
1.09_363.13973	POS	1.09	363.14	C17 H24 O7	(2S,3R,4S,5S,6R)-2-[4-hydroxy-2-(3-methylbut-2-en-1-yl)phenoxy]-6-(hydroxymethyl)oxane-3,4,5-triol	64618.9	81.8727	level2	mzCloud										4.71824e+06	4.99136e+06	7.53878e+06	4.44487e+06	6.36492e+06	6.30238e+06	5.21649e+06	7.99491e+06	7.0523e+06	3.35042e+06	4.66124e+06	8.29912e+06	5.53119e+06	7.13607e+06	6.44641e+06	5.20362e+06	7.01975e+06	5.05361e+06	8.25648e+06	6.25499e+06	118915	599154	110138	112037	139623	338469	87935.7	568683	130962	129796	3.79357e+06
1.123_255.09761	POS	1.123	255.098	C11 H20 O4	NP-002854	175603	84.8294	level2	mzCloud										2.45076e+06	3.37204e+06	5.94105e+06	1.20309e+06	4.47353e+06	1.54826e+07	5.96476e+06	1.21138e+07	7.95365e+06	8.92155e+06	3.851e+06	3.86107e+06	1.58061e+06	7.39498e+06	8.66861e+06	2.84284e+06	7.10328e+06	2.68989e+06	5.69568e+06	2.55708e+06	4.14634e+07	2.78766e+07	2.88165e+07	3.00771e+07	3.88661e+07	7.27848e+07	4.96131e+07	7.58859e+07	1.86036e+07	2.41099e+07	4.07356e+07
1.159_144.10216	POS	1.159	144.102	C7 H13 N O2	NP-021733	1.80347	83.8413	level2	mzCloud										1.06566e+08	5.36365e+07	5.38685e+07	5.03361e+07	7.22108e+07	9.92654e+07	7.28647e+07	5.12432e+07	4.04527e+07	1.08655e+08	7.25163e+07	6.81814e+07	4.57978e+07	1.07014e+08	4.73847e+07	5.8755e+07	6.29352e+07	6.83665e+07	5.07402e+07	7.27146e+07	1.20433e+07	8.79776e+06	7.94812e+06	9.74985e+06	6.50494e+06	5.5531e+07	6.07483e+07	2.32757e+07	1.89375e+07	3.43469e+07	3.72874e+07
1.232_178.08657	POS	1.232	178.087	C10 H13 N O3	1-(3,4-dimethoxyphenyl)ethan-1-one oxime	-92317.8	85.5165	level2	mzCloud										1.97258e+06	1.65516e+06	3.14896e+06	2.03498e+06	2.20942e+06	2.32007e+06	1.48342e+06	1.23598e+06	1.26648e+06	3.95959e+06	1.69196e+06	1.28544e+06	577683	1.5941e+06	1.99205e+06	2.63968e+06	1.32661e+06	1.26668e+06	1.05364e+06	1.75666e+06	1.00372e+07	3.07599e+07	2.19431e+07	8.37429e+06	5.20366e+07	3.53481e+07	2.80743e+07	4.84074e+07	6.59418e+06	1.59493e+07	800462
1.297_277.17576	POS	1.297	277.176	C15 H26 O3	NP-004917	86472.5	62.68	level2	mzCloud										4.39539e+06	8.07823e+06	6.54627e+06	5.01813e+06	1.48663e+07	2.358e+06	7.16915e+06	8.65753e+06	1.51138e+07	3.16403e+06	4.66625e+06	1.09385e+07	4.1971e+06	1.72911e+07	5.09062e+06	7.06014e+06	5.59297e+06	5.7755e+06	4.31559e+06	5.44161e+06	1.27388e+06	1.80057e+06	1.46631e+06	767702	1.5352e+06	3.90436e+06	1.2975e+07	5.26606e+06	2.1783e+07	1.87421e+07	3.92004e+06
1.319_144.06579	POS	1.319	144.066	C6 H11 N O4	Methyl 2-[(2-methoxy-2-oxoethyl)amino]acetate	1.72016	62.999	level2	mzCloud										1.33961e+07	1.03451e+07	6.43923e+06	9.79233e+06	7.86675e+06	8.92608e+06	6.33749e+06	6.629e+06	1.88018e+07	8.27145e+06	9.20654e+06	9.16594e+06	1.07157e+07	1.17547e+07	1.53984e+07	7.4482e+06	7.82301e+06	1.62233e+07	1.69446e+07	7.54868e+06	7.51035e+06	1.27209e+07	8.65732e+06	8.52498e+06	1.05501e+07	1.12929e+07	8.6526e+06	9.08606e+06	1.57433e+07	1.04893e+07	9.20876e+06
1.373_305.06946	NEG	1.373	305.069	C16 H10 N4 O3	4-((5-(4-Nitrophenyl)oxazol-2-yl)amino)benzonitrile	4.71955	62.131	level2	mzCloud										1713.91	2064.17	1887.76	3654.49	3697.11	1909.19	1871.72	1584.35	1438.55	1916.07	3731.08	1304.24	3433.26	1520.15	3035.94	1872.14	1749.62	3860.86	1274.46	2251.66	283191	397650	403432	589186	260855	298018	275500	85941.9	329270	552388	16056.1
1.381_212.12841	POS	1.381	212.128	C11 H17 N O3	Metaproterenol	1.37649	66.1792	level2	mzCloud										5.19798e+06	2.57117e+06	2.29728e+06	3.08681e+06	1.75069e+06	1.10097e+06	5.9055e+06	1.09411e+06	898160	1.25576e+06	1.86504e+06	3.91663e+06	3.18765e+06	1.58574e+06	2.01242e+06	4.87016e+06	845007	2.44696e+06	3.45695e+06	8.42034e+06	1.05321e+06	1.74535e+06	1.33593e+06	213460	424192	722096	1.06663e+06	897299	1.78821e+06	1.31319e+06	435778
1.396_344.13387	POS	1.396	344.134	C15 H18 O8	(2E)-3-(2-{[(2S,3R,4S,5S,6R)-3,4,5-trihydroxy-6-(hydroxymethyl)oxan-2-yl]oxy}phenyl)prop-2-enoic acid	52212.2	69.5563	level2	mzCloud										52742.8	57073.4	26776.2	20712.9	19102.1	385538	107238	82363.3	129434	344575	19487.9	45822	18480.2	23807.6	32027.6	97177.5	142425	21166.7	102253	20668.7	1.60474e+06	2.66139e+06	8.13731e+06	1.08452e+07	7.46747e+06	1.95442e+07	4.38824e+06	7.62268e+06	4.11579e+06	2.3756e+06	914061
1.42_204.12333	POS	1.42	204.123	C9 H14 O4	NP-003459	91498.3	75.411	level2	mzCloud										1.29998e+07	7.12974e+06	5.8691e+06	5.3269e+06	4.3364e+06	6.57387e+06	7.79604e+06	7.30406e+06	6.87298e+06	7.92667e+06	6.4923e+06	9.8174e+06	6.87027e+06	9.7651e+06	5.48778e+06	1.05066e+07	6.23593e+06	6.68848e+06	1.01921e+07	6.43467e+06	3.36025e+06	2.22571e+07	2.94582e+07	5.51978e+06	1.91345e+07	2.83198e+07	1.81313e+07	1.95633e+07	7.11779e+06	1.79133e+07	3.76228e+06
1.422_196.14481	POS	1.422	196.145	C10 H17 N3 O	2-Amino-5-isopentyl-6-methylpyrimidin-4-ol	1.9262	66.4803	level2	mzCloud										12249.4	11007.7	65693.4	10036.4	158794	64900.8	9711.85	8503.87	10252.2	28431.8	8117.6	8846.23	27930.7	11259.2	18136.4	8713.1	27971.5	13979.9	13354.5	9169.65	17117.2	19945.8	16530.4	13679.3	20914.4	18464.6	10806.9	17087.3	11411.9	9014.45	14919.7
1.533_164.07084	POS	1.533	164.071	C9 H9 N O2	indoline-2-carboxylic acid	1.43152	77.7694	level2	mzCloud										9.77456e+06	8.6466e+06	9.005e+06	6.67083e+06	3.00369e+06	2.2109e+06	5.34287e+06	5.15463e+06	4.92609e+06	8.70595e+06	7.33289e+06	3.91403e+06	3.6713e+06	6.74632e+06	7.10391e+06	6.61404e+06	2.46907e+06	2.26294e+06	2.3643e+06	3.21644e+06	2.8466e+06	1.67798e+07	3.6225e+06	2.82347e+06	4.3036e+06	1.06207e+07	8.03202e+06	7.43088e+06	2.39865e+06	4.71975e+06	1.34896e+06
1.652_300.14413	POS	1.652	300.144	C14 H18 O6	NP-020363	60354.1	66.2259	level2	mzCloud										229237	273748	299135	274591	282567	1.87305e+06	234515	378273	207319	399333	141451	313138	302659	320655	185975	325184	384167	318096	629059	274013	303222	1.16548e+06	1.74125e+06	2.27866e+06	404528	953228	332871	348098	167658	130222	429443
1.68_226.11881	POS	1.68	226.119	C10 H15 N3 O3	1,3-Dimethyl-6-morpholino-1,2,3,4-tetrahydropyrimidine-2,4-dione	0.873292	66.524	level2	mzCloud										4.57224e+06	6.70741e+06	3.4097e+06	2.86237e+06	3.32306e+06	5.75456e+06	6.54883e+06	4.69848e+06	4.71942e+06	9.18351e+06	2.32617e+06	3.55181e+06	3.882e+06	4.47038e+06	3.43369e+06	5.04036e+06	2.98612e+06	3.81676e+06	5.98572e+06	5.19162e+06	4.75725e+06	5.55163e+06	5.26204e+06	1.04475e+07	1.74113e+07	1.54171e+07	8.09196e+06	2.68319e+07	1.91476e+06	1.09437e+06	9.51138e+06
1.692_268.09287	POS	1.692	268.093	C14 H15 N O3	4-oxo-4-(5,6,7,8-tetrahydronaphthalen-1-ylamino)but-2-enoic acid	89677.4	61.4206	level2	mzCloud										1.09155e+06	539840	744268	229244	488810	1.19543e+06	1.48121e+06	1.35643e+06	1.23999e+06	1.77964e+06	1.14932e+06	569144	1.12753e+06	378981	292596	463843	417901	478497	907419	1.16472e+06	5.27518e+06	3.70234e+06	6.18089e+06	7.93862e+06	4.90902e+06	2.01697e+06	1.59628e+06	3.77573e+06	1.1221e+06	1.42607e+06	4.51927e+06
1.719_165.10251	POS	1.719	165.103	C9 H12 N2 O	2-(Cyclopropylcarbonyl)-3-(dimethylamino)acrylonitrile	1.67078	82.2179	level2	mzCloud										715361	1.45875e+06	1.9394e+06	1.3692e+06	1.36927e+06	716745	584127	885710	502978	1.15484e+06	837289	553610	783813	897973	1.21265e+06	1.48924e+06	575456	1.00867e+06	858197	1.00636e+06	2.3694e+06	1.97151e+06	653074	235430	2.21531e+06	6.46948e+06	3.52494e+06	1.1586e+07	4.38288e+06	4.58978e+06	174872
1.796_269.08814	POS	1.796	269.088	C13 H17 Cl N2 S	N-(4-chlorophenyl)-N'-cyclohexylthiourea	2.84693	65.4085	level2	mzCloud										1.43701e+07	1.35157e+07	1.60225e+07	8.20271e+06	1.23006e+07	9.41278e+06	5.58234e+06	5.15987e+06	6.86536e+06	1.0164e+07	9.96004e+06	7.2523e+06	5.66192e+06	1.31847e+07	7.62844e+06	7.80519e+06	1.6469e+07	2.53169e+06	5.18589e+06	2.8608e+06	3.33214e+07	1.5116e+07	1.59137e+07	8.93332e+06	2.40535e+07	3.02971e+07	3.35747e+07	2.09906e+07	5.26835e+07	6.88261e+07	2.04789e+07
1.817_192.10223	POS	1.817	192.102	C11 H13 N O2	Methyl 1,2,3,4-tetrahydroquinoline-2-carboxylate	1.71411	70.9582	level2	mzCloud										2.85431e+07	4.06936e+07	3.52854e+07	1.03449e+07	5.28939e+07	1.13554e+07	5.68468e+07	2.50135e+07	1.35165e+07	3.00455e+07	2.00706e+07	4.83892e+07	2.89432e+07	2.97333e+07	3.00229e+07	2.95019e+07	1.39639e+07	1.97854e+07	1.49891e+07	4.27919e+07	2.89969e+07	1.06555e+08	6.7748e+07	1.33077e+07	5.85829e+07	1.10931e+07	7.79522e+06	1.13674e+07	1.12068e+07	1.45441e+07	2.21778e+06
10.044_267.23255	NEG	10.044	267.233	C17 H32 O2	trans-10-Heptadecenoic acid	-1.51578	97.5367	level2	mzCloud										829583	1.01864e+06	1.04554e+06	1.01657e+06	1.42115e+06	823255	1.23605e+06	445242	765787	806325	902137	2.12062e+06	2.13546e+06	1.61559e+06	1.37997e+06	1.03412e+06	1.68052e+06	830879	942876	1.37289e+06	178125	120733	89844.9	100408	56711.9	84766.7	114524	45456.7	258274	209768	263852
10.06_347.23480	POS	10.06	347.235	C20 H36 O2	1-(3-hydroxy-3-methylpent-4-en-1-yl)-2,5,5,8a-tetramethyl-decahydronaphthalen-2-ol	123125	72.9572	level2	mzCloud										142298	225430	242665	233156	375514	58900.7	144472	200793	75451.5	213769	410025	215901	166803	233905	232849	261215	186967	192458	184990	224842	455417	728166	310277	275694	60969.6	176367	665739	115320	3.43433e+06	4.97414e+06	536608
10.063_481.29280	NEG	10.063	481.293	C25 H36 N6 O	1-{[(2R,4S,5R)-5-{6-[4-(Dimethylamino)phenyl]-2-methyl-4-pyrimidinyl}-1-azabicyclo[2.2.2]oct-2-yl]methyl}-3-isopropylurea	105445	65.251	level2	mzCloud										5.03651e+06	5.78275e+06	6.67813e+06	1.02277e+07	1.07194e+07	4.36604e+06	7.36205e+06	8.24908e+06	4.567e+06	3.80494e+06	6.8807e+06	5.75039e+06	1.28131e+07	8.95849e+06	7.16112e+06	7.8344e+06	1.01778e+07	6.91539e+06	3.97766e+06	9.13952e+06	4.04059e+06	3.75981e+06	2.49926e+06	3.0432e+06	1.48415e+06	944044	1.92415e+06	615354	1.04467e+07	4.77525e+06	9.55383e+06
10.073_605.23763	POS	10.073	605.238	C34 H38 O11	[(2R,3S,4S,5R,6R)-6-{[1,7-bis(4-hydroxyphenyl)-5-oxoheptan-3-yl]oxy}-3,4,5-trihydroxyoxan-2-yl]methyl (2E)-3-(4-hydroxyphenyl)prop-2-enoate	-28945.4	72.4449	level2	mzCloud										4626.44	7471.42	6983.35	7588.27	7811.89	3501.75	5991.06	73287.9	3649.36	5591.65	6723.5	3719.54	8201.9	4192.61	13399.6	6528.49	52968.7	7240.01	4804.45	10525.1	6910.74	14340.5	5819.83	10687	5294.33	5942.09	7829.16	7168.07	22420.4	17928.3	11577.4
10.082_280.23581	NEG	10.082	280.236	C18 H32 O2	Linoleic Acid	3578.56	77.8184	level2	mzCloud										3.73874e+06	3.65613e+06	6.99254e+06	4.46268e+06	6.71295e+06	8.10002e+06	5.30787e+06	2.58651e+06	1.78223e+06	3.49261e+06	6.28014e+06	3.13199e+06	3.07762e+06	4.01823e+06	3.37306e+06	3.46191e+06	4.86002e+06	2.55092e+06	1.93946e+06	3.44977e+06	1.20154e+07	1.00635e+07	3.4666e+06	2.50976e+06	2.27138e+06	8.14851e+06	2.04351e+07	1.27611e+07	4.72329e+07	4.17839e+07	3.93361e+06
10.15_389.21355	POS	10.15	389.214	C15 H28 N6 O6	QNK	-1.96159	64.8497	level2	mzCloud										112378	153900	332670	178636	432299	62691.6	229071	199698	119174	260345	595390	321269	316704	248194	300767	359929	405976	254088	250431	447292	1.32962e+06	1.88909e+06	789961	389968	202641	297384	845937	233550	3.92781e+06	5.02065e+06	568451
10.187_535.27125	POS	10.187	535.271	C33 H34 N4 O3	SB236057A	1.65869	76.3761	level2	mzCloud										17349.1	39246.2	24091.3	48548.9	42910.8	13612	15143.4	30067.8	16307.4	13969.5	81356.6	105766	192258	15940.4	126313	13132.9	17400.3	9385.23	17360.9	14494.9	16390.1	14065.1	14836	15944.2	12081	10652.6	10360	12930.8	27249.9	19216.4	86925.2
10.278_537.28706	POS	10.278	537.287	C25 H44 O12	NP-021047	-6.50575	64.2667	level2	mzCloud										200820	239708	64355.8	320860	98770.7	94377.5	206443	205023	80436.6	22349.7	1.07752e+06	1.22053e+06	1.8427e+06	481652	1.24212e+06	86580.3	136107	127096	70801.7	165063	31126.6	61296.8	22415.3	31108	21690.7	25360.7	56455.1	24226.3	66300	86839.9	491838
10.352_281.24813	NEG	10.352	281.248	C18 H34 O2	trans-Petroselinic acid	-1.63175	98.4305	level2	mzCloud										5.60716e+07	5.33727e+07	8.36939e+07	8.06866e+07	9.62218e+07	3.67367e+07	6.69848e+07	4.30268e+07	3.83871e+07	5.40713e+07	7.36216e+07	6.31773e+07	4.81509e+07	5.61515e+07	6.35171e+07	5.3864e+07	8.10192e+07	5.64042e+07	3.6994e+07	6.64923e+07	1.03879e+08	1.25364e+08	6.85059e+07	6.69932e+07	4.27416e+07	4.15171e+07	1.63795e+08	5.26503e+07	4.98498e+08	5.34703e+08	7.97516e+07
10.947_309.27947	NEG	10.947	309.279	C20 H38 O2	11(Z)-Eicosenoic acid	-1.40244	96.5236	level2	mzCloud										516533	939575	1.0168e+06	2.19203e+06	1.93098e+06	264171	611102	627921	389776	362376	1.14307e+06	493204	991953	317190	1.09353e+06	520418	998624	920394	455306	1.53465e+06	604884	1.13268e+06	179446	830381	113360	381616	848398	123597	1.64362e+07	1.67731e+07	1.35328e+06
2.033_300.12642	POS	2.033	300.126	C15 H17 N5 S	3-(1-ethyl-3-methyl-1H-pyrazol-5-yl)-5-(methylthio)-4-phenyl-4H-1,2,4-triazole	-4.41959	74.0998	level2	mzCloud										3.22122e+06	3.69159e+06	3.48287e+06	3.75998e+06	6.53753e+06	3.40572e+06	4.34737e+06	3.35864e+06	3.84818e+06	3.02316e+06	5.45146e+06	5.15103e+06	5.09503e+06	5.543e+06	4.91625e+06	3.06221e+06	4.01192e+06	3.593e+06	3.28692e+06	2.59965e+06	4.76873e+06	3.39431e+06	2.15247e+06	2.51034e+06	1.29036e+06	3.26715e+06	4.84856e+06	2.9456e+06	1.06596e+07	8.02613e+06	3.51837e+06
2.179_381.19156	NEG	2.179	381.192	C15 H30 N4 O5	2-[(2S,3R,4S,5R)-3,4-Dihydroxy-5-{[(isopropylcarbamoyl)amino]methyl}tetrahydro-2-furanyl]-N-[2-(dimethylamino)ethyl]acetamide	103914	90.5203	level2	mzCloud										357238	642040	269220	468773	283982	363823	555157	391210	471208	520309	1.18271e+06	659783	955538	1.28813e+06	786082	2.10768e+06	253474	2.75096e+06	2.14395e+06	2.19258e+06	9827.73	8373.4	13711.8	7890.18	8776.1	13081.8	13969.5	18399.4	13409.8	14470.2	42817.2
2.234_153.05399	POS	2.234	153.054	C8 H10 O4	NP-001422	-105912	76.4674	level2	mzCloud										4.53766e+06	4.11436e+06	7.42108e+06	5.42967e+06	1.74197e+06	1.02274e+06	2.38623e+06	2.48967e+06	1.55232e+06	1.50448e+06	2.72157e+06	1.73071e+06	1.90772e+06	1.94873e+06	2.30266e+06	3.50536e+06	2.29895e+06	3.54766e+06	1.50465e+06	3.59506e+06	491102	599055	790120	536172	771890	995282	936053	1.78384e+06	905760	425925	300010
2.337_171.11310	POS	2.337	171.113	C16 H28 N4 O4	PPK	-499999	65.7326	level2	mzCloud										1.38459e+06	1.20779e+06	1.60454e+06	1.006e+06	1.53218e+06	1.79257e+06	1.59067e+06	1.54771e+06	1.15506e+06	1.13499e+06	918512	1.05617e+06	1.22645e+06	1.45492e+06	408462	2.40138e+06	1.53012e+06	980790	1.41138e+06	1.33253e+06	230690	586665	825631	651138	742323	650471	536746	718380	466448	597318	1.00772e+06
2.348_225.08720	POS	2.348	225.087	C10 H18 O3	NP-011223	203918	68.5335	level2	mzCloud										1.44441e+06	805158	1.04119e+06	1.15835e+06	819994	2.48206e+06	2.38459e+06	1.23626e+06	1.16337e+06	1.068e+06	1.01591e+06	621594	977261	812561	1.0962e+06	2.19032e+06	1.78427e+06	819121	1.24533e+06	1.47302e+06	2.79746e+06	1.1625e+07	1.80457e+07	2.99608e+06	1.85988e+07	1.85189e+07	6.95584e+06	1.29404e+07	3.33871e+06	5.92336e+06	1.36169e+06
2.411_217.01739	NEG	2.411	217.017	C11 H7 Cl N2 O	NP-006226	-0.132201	62.6547	level2	mzCloud										9541.92	10912.5	24207.1	4687.11	5282.26	64793.7	48655.8	49479.5	25989.8	19400.6	3604.66	11785.5	9789.97	23921.6	4997.11	29926.7	104722	55186.2	64539.5	76083	18864.7	10671.2	20158.7	28907.9	7719.53	4855.48	3991.43	9190.64	7709.68	5460.63	423684
2.447_349.19683	POS	2.447	349.197	C18 H30 O5	2,3-Dinor-11beta-prostaglandin F2alpha	67380.8	63.5512	level2	mzCloud										876145	746565	1.01343e+06	213679	1.11956e+06	2.10317e+06	738068	1.02866e+06	668980	1.71707e+06	484982	1.13846e+06	325073	1.91088e+06	338880	514163	585921	788995	1.04345e+06	470828	4.4124e+06	2.00666e+06	1.51844e+06	2.78183e+06	2.7677e+06	5.673e+06	2.91371e+06	1.10751e+06	572725	387078	655693
2.456_225.12359	POS	2.456	225.124	C11 H16 N2 O3	6-cyclohex-3-enyl-5-nitropiperidin-2-one	1.00683	68.1273	level2	mzCloud										8.46096e+06	3.62533e+06	1.15303e+07	6.74834e+06	7.80793e+06	7.76407e+06	8.43481e+06	8.60748e+06	1.0471e+07	9.48845e+06	6.00707e+06	1.81082e+06	5.96979e+06	1.14885e+07	5.77937e+06	7.56501e+06	8.63642e+06	8.32573e+06	8.90893e+06	7.29672e+06	4.7306e+06	6.39909e+06	4.36944e+06	5.31395e+06	5.17125e+06	4.53825e+06	3.11826e+06	6.87686e+06	4.29313e+06	4.77706e+06	2.54842e+06
2.462_436.18393	POS	2.462	436.184	C22 H27 N3 O5	(1S,2S,3S,4R,5R)-2-[(1,3-Benzodioxol-5-ylmethyl)amino]-4-{methyl[2-(2-pyridinyl)ethyl]amino}-6,8-dioxabicyclo[3.2.1]octan-3-ol	53199	71.2799	level2	mzCloud										913330	1.13211e+06	684061	767242	1.37678e+06	1.38934e+06	1.53423e+06	577136	627637	1.92544e+06	1.43846e+06	967329	335195	1.42051e+06	1.66525e+06	911430	2.0432e+06	508309	1.2091e+06	611900	9.47419e+06	7.04973e+06	9.18511e+06	6.82716e+06	1.30589e+07	9.81582e+06	6.36602e+06	6.01395e+06	9.67422e+06	8.20493e+06	4.5441e+06
2.475_280.11793	POS	2.475	280.118	C14 H14 O5	3-(2,3-dihydroxy-5-methylphenoxy)-5-methylbenzene-1,2-diol	64965.9	62.62	level2	mzCloud										405385	1.06797e+06	765190	224205	1.31818e+06	216584	723092	667248	313850	609252	478228	1.22707e+06	727135	541521	624698	576084	99506.3	404603	334470	781462	916789	4.80789e+06	2.23619e+06	801463	2.38885e+06	246777	221615	278418	57559.7	137160	34988.7
2.498_164.09341	POS	2.498	164.093	C7 H9 N5	N,N-dimethyl-9H-purin-6-amine	2.04754	77.3051	level2	mzCloud										6.78834e+06	4.31544e+06	4.0091e+06	3.81576e+06	2.90498e+06	4.08252e+06	4.17672e+06	4.26797e+06	4.90262e+06	6.95596e+06	4.58934e+06	3.30947e+06	1.70667e+06	2.72881e+06	1.97646e+06	3.14269e+06	1.91961e+06	3.46908e+06	4.08166e+06	2.82735e+06	830136	1.35923e+06	1.04845e+06	412776	999477	1.77827e+06	1.58276e+06	1.75595e+06	2.55776e+06	9.90655e+06	904418
2.551_174.10292	POS	2.551	174.103	C10 H11 N3	3-Methyl-1-phenyl-1H-pyrazol-5-amine	2.01467	74.852	level2	mzCloud										24840.9	223158	91205.3	24274.1	130074	583460	87189.9	419016	154387	188366	62683.2	334000	89466.9	2.02311e+06	63901.2	49975.8	976084	66593.5	1.11818e+06	14683.1	72904.3	40628	117662	16070.4	30786.2	321965	1.10104e+06	422211	556047	46506.1	1.64561e+06
2.572_305.11341	POS	2.572	305.113	C15 H22 O4	(3aR,4aS,5R,6S,8S,9aR)-5,6-dihydroxy-4a,8-dimethyl-3-methylidene-dodecahydroazuleno[6,5-b]furan-2-one	142604	85.7029	level2	mzCloud										152893	64019.4	210452	110912	166445	115926	73857.4	61624.2	62285.1	82669.6	73156.3	102735	70023.8	69789.7	70702.6	127398	45960.1	80716.4	52647.2	158652	691153	2.45188e+06	1.8342e+06	409243	3.43046e+06	1.36502e+06	684757	1.95234e+06	28808.7	226430	28866.4
2.701_199.10808	POS	2.701	199.108	C9 H14 N2 O3	3-(1-hydroxyethyl)-2,3,6,7,8,8a-hexahydropyrrolo[1,2-a]pyrazine-1,4-dione	1.82888	75.1609	level2	mzCloud										7.82649e+06	4.55949e+06	5.79466e+06	6.63816e+06	6.50273e+06	4.23795e+06	3.98812e+06	4.31711e+06	7.59371e+06	3.73594e+06	4.60553e+06	8.92236e+06	4.42588e+06	7.49997e+06	3.48604e+06	6.52972e+06	5.18649e+06	6.81045e+06	6.6656e+06	5.00926e+06	1.87819e+06	6.27048e+06	2.89264e+06	3.66773e+06	1.75104e+06	963124	1.73597e+06	1.63004e+06	3.54236e+06	1.7753e+06	3.99873e+06
2.716_279.09774	POS	2.716	279.098	C14 H15 F N2 O S	N2-tetrahydrofuran-2-ylmethyl-4-(4-fluorophenyl)-1,3-thiazol-2-amine	5.58803	63.2346	level2	mzCloud										206602	223586	276837	46308.7	199514	151711	146537	145165	61183.4	72419.2	163342	51540	208518	97545.2	116460	46932.3	104604	171373	48780.4	64601.1	145705	397323	424716	164816	192336	201618	125328	181615	102301	73428.5	393458
2.724_267.13408	POS	2.724	267.134	C13 H18 N2 O4	2-{2-Oxo-2-[4-(1H-pyrrol-1-yl)piperidino]ethoxy}acetic acid	0.546015	60.2724	level2	mzCloud										2.06292e+06	1.66099e+06	2.80895e+06	2.36624e+06	2.36517e+06	3.10045e+06	2.42412e+06	2.86817e+06	1.84998e+06	2.29815e+06	2.00564e+06	2.90843e+06	2.82876e+06	2.48412e+06	2.66902e+06	1.84427e+06	4.24972e+06	3.25094e+06	3.56962e+06	2.27388e+06	2.30472e+06	1.11717e+06	492790	1.24853e+06	1.81268e+06	8.71079e+06	1.85926e+06	2.42468e+06	995240	1.26936e+06	1.60091e+06
2.732_196.09732	POS	2.732	196.097	C10 H12 O4	3-(4-hydroxy-3-methoxyphenyl)propanoic acid	86839.8	72.6359	level2	mzCloud										1.31249e+07	1.24651e+07	1.34128e+07	1.46772e+07	1.11723e+07	1.36002e+07	1.30216e+07	1.28621e+07	1.24812e+07	1.35271e+07	1.13811e+07	1.57024e+07	1.45051e+07	1.38626e+07	1.1203e+07	1.28082e+07	1.03566e+07	1.369e+07	1.32648e+07	1.21842e+07	5.97711e+06	4.5021e+06	5.16647e+06	5.07383e+06	4.82002e+06	6.60716e+06	3.38351e+06	5.48512e+06	4.2737e+06	3.69597e+06	4.00392e+06
2.758_365.12725	NEG	2.758	365.127	C19 H18 N4 O4	4-({(2S,4R)-4-Hydroxy-2-[3-(3-pyridinyl)-1,2,4-oxadiazol-5-yl]-1-pyrrolidinyl}methyl)benzoic acid	4.7137	66.5805	level2	mzCloud										33390.1	38133.6	91798.1	99416.7	24597.1	113428	96133	58743.2	72075.5	70121.7	57452.4	45368.3	27860.4	74859.7	26185.3	44281	30859	60167	37526.7	30896.6	29274.7	14674.2	11011.4	23887.6	31030.9	6842.14	4377.11	3818.77	2732.84	3911.62	793268
2.771_226.10759	POS	2.771	226.108	C11 H15 N O4	3-isopropoxy-4-morpholinocyclobut-3-ene-1,2-dione	0.916346	71.8823	level2	mzCloud										8.6262e+06	8.78222e+06	1.06279e+07	1.45686e+07	9.44709e+06	8.87091e+06	1.00882e+07	1.2523e+07	8.81685e+06	5.48175e+06	7.8183e+06	9.01036e+06	1.07097e+07	7.98025e+06	8.6065e+06	9.37438e+06	2.65935e+07	9.94439e+06	1.02e+07	1.06729e+07	3.26505e+06	2.59723e+06	2.06861e+06	2.81997e+06	1.36933e+06	2.2843e+06	1.17179e+06	1.89868e+06	3.30922e+06	3.05327e+06	1.01148e+07
2.79_206.11795	POS	2.79	206.118	C12 H15 N O2	2-piperidinobenzoic acid	1.91433	80.5266	level2	mzCloud										190626	193845	374138	99991	470497	148059	328427	92991	237131	395132	101436	281375	89260.3	143003	133346	128010	131607	99183.2	52966.3	143986	2.5143e+06	4.90676e+06	6.38293e+06	998082	1.00453e+07	1.0171e+07	8.09708e+06	1.2581e+07	1.51394e+07	1.12451e+07	106161
2.8_331.13226	POS	2.8	331.132	C17 H18 N2 O5	2-{[(4,5-dimethoxy-2-nitrophenethyl)imino]methyl}phenol	10.3391	66.733	level2	mzCloud										468497	350720	516966	672794	479385	727151	515497	625884	416097	442074	364021	643875	576727	575265	258685	730278	788868	768919	708373	618562	12253.7	10607.3	14437.9	19066.2	19828.1	16039.7	11402.5	16854	14017.9	16172.7	151768
2.832_289.13945	POS	2.832	289.139	C15 H22 O4	4,8-dihydroxy-6,6,8-trimethyl-1H,3H,4H,4aH,5H,6H,7H,7aH,8H,9H-azuleno[5,6-c]furan-1-one	82585.8	65.1861	level2	mzCloud										2.2441e+06	1.97423e+06	2.94069e+06	3.15242e+06	2.10107e+06	2.68324e+06	1.86185e+06	2.78424e+06	2.1137e+06	855809	2.15304e+06	3.05458e+06	2.21218e+06	2.86882e+06	1.89677e+06	2.02722e+06	3.16978e+06	2.66618e+06	2.98143e+06	2.08034e+06	416467	164922	176028	225602	274714	111498	302340	260384	425073	216935	815085
2.849_228.08689	POS	2.849	228.087	C10 H10 O5	NP-016101	81059.6	60.911	level2	mzCloud										4.74032e+06	4.35415e+06	5.93153e+06	6.07087e+06	5.0167e+06	4.94473e+06	5.18435e+06	4.8746e+06	5.14693e+06	3.83004e+06	3.72706e+06	5.4751e+06	5.15473e+06	5.15846e+06	3.88489e+06	4.11728e+06	4.46197e+06	4.64764e+06	5.38644e+06	4.41024e+06	609025	568998	459873	634974	843007	800018	650503	528403	825918	584138	3.04247e+06
2.859_266.12486	POS	2.859	266.125	C11 H15 N5 O3	N6-Me-dA	0.347107	90.869	level2	mzCloud										3.03574e+07	1.58393e+07	2.1112e+07	2.52108e+07	1.93268e+07	2.02657e+07	2.2448e+07	1.68433e+07	1.01273e+07	6.93941e+06	8.21705e+06	1.75476e+07	2.22092e+07	2.51442e+07	1.15459e+07	1.70949e+07	2.32777e+07	1.08244e+07	1.31777e+07	1.82605e+07	9.41193e+06	2.74711e+06	4.04416e+06	9.15273e+06	8.13494e+06	5.98832e+06	7.30837e+06	6.44145e+06	6.96312e+06	3.29635e+06	6.58329e+06
2.918_226.11877	POS	2.918	226.119	C10 H15 N3 O3	N1-(5-methylisoxazol-3-yl)-2-morpholinoacetamide	0.679932	77.1393	level2	mzCloud										1.41183e+06	2.49272e+06	3.27345e+06	2.98084e+06	2.26505e+06	3.16588e+06	2.53533e+06	3.65576e+06	3.46178e+06	2.34305e+06	1.81152e+06	3.44264e+06	2.60538e+06	2.35783e+06	2.29334e+06	3.00831e+06	3.54395e+06	3.15381e+06	3.89338e+06	3.11926e+06	56351.3	109180	212628	80335.4	208659	45518.9	115071	238599	94694.6	50465.9	795003
2.928_195.03317	NEG	2.928	195.033	C9 H9 Cl N2 O	3-(4-chlorophenyl)-5-methyl-2,5-dihydro-1,2,4-oxadiazole	0.554312	60.966	level2	mzCloud										6344.68	29149.7	10717.3	7254.17	7350.23	56583.1	6744.48	102439	12285.6	89089.9	7665.35	11517.5	6169.29	6221.78	7031.52	90913.2	5740.04	34069.6	7943.46	6813.71	16503.3	22707.3	24146.3	11533.4	26473.7	10146.9	9440.91	20613.2	9533.79	17797.6	37948.7
2.937_200.09214	POS	2.937	200.092	C9 H13 N O4	methyl 2-[(2-acetyl-3-oxo-1-butenyl)amino]acetate	2.03384	64.1156	level2	mzCloud										1.29519e+07	1.24053e+07	1.37454e+07	1.09925e+07	9.38127e+06	1.62461e+07	1.43032e+07	1.2652e+07	1.14971e+07	9.97268e+06	9.61571e+06	1.95161e+07	1.76518e+07	1.09053e+07	1.0234e+07	8.70624e+06	7.82097e+06	9.16318e+06	1.11422e+07	8.22856e+06	7.88051e+06	3.78537e+06	1.41059e+07	3.83805e+06	4.53258e+06	3.84728e+06	3.62804e+06	3.80288e+06	3.44658e+06	4.11171e+06	6.55655e+06
2.943_301.16531	NEG	2.943	301.165	C16 H22 N4 O2	NP-001134	-5.59584	63.8749	level2	mzCloud										439874	107618	58282.6	709621	138724	163558	1.84655e+06	141606	218468	2.44018e+06	1.86962e+06	344393	426049	87412.4	140417	339454	157470	312934	222894	4.48138e+06	2.62871e+07	1.7662e+07	5.28246e+06	2.46246e+07	1.04416e+07	9.56175e+06	1.4175e+07	2.24095e+06	1.88897e+07	1.59551e+07	2.70239e+07
2.952_190.10776	POS	2.952	190.108	C8 H15 N O4	2-Aminooctanedioic acid	1.86622	74.1717	level2	mzCloud										5.24654e+06	5.85442e+06	7.89579e+06	5.59283e+06	5.98958e+06	5.65578e+06	6.71395e+06	5.48325e+06	5.70043e+06	6.062e+06	4.94089e+06	5.61638e+06	5.65064e+06	4.76284e+06	4.56201e+06	6.19864e+06	7.12063e+06	5.35212e+06	6.6471e+06	6.25694e+06	1.16864e+06	1.26375e+06	1.25419e+06	4.22131e+06	410161	1.53476e+06	1.54425e+06	4.42704e+06	1.86555e+06	5.75515e+06	4.21515e+06
2.97_292.06412	POS	2.97	292.064	C14 H13 N O4 S	N-(1,3-benzodioxol-5-ylmethyl)benzenesulfonamide	1.08887	79.7626	level2	mzCloud										1.27513e+06	1.10175e+06	1.74672e+06	1.60677e+06	1.29311e+06	256829	257070	456903	359081	1.34382e+06	1.19776e+06	592061	388717	1.53082e+06	1.9302e+06	1.38776e+06	233181	837672	233634	375723	2.55772e+06	6.22327e+06	409260	362195	1.13645e+06	2.98765e+06	1.59428e+06	4.39054e+06	671889	1.88472e+06	55401.9
2.98_315.18162	POS	2.98	315.182	C16 H28 O7	(2R,3R,4S,5S,6R)-2-{[(2E,6R)-6-hydroxy-2,6-dimethylocta-2,7-dien-1-yl]oxy}-6-(hydroxymethyl)oxane-3,4,5-triol	-54214.5	67.3461	level2	mzCloud										1.76126e+06	2.06599e+06	1.6228e+06	1.66811e+06	1.33794e+06	1.02913e+06	1.52615e+06	835668	1.75273e+06	1.54007e+06	1.51803e+06	2.30981e+06	1.0284e+06	1.17121e+06	1.33408e+06	1.03694e+06	1.44143e+06	1.98812e+06	2.81721e+06	757683	51471.4	26984.2	103856	45878.3	48494.5	87612.9	48059.2	158901	26500.4	28484.9	18401.9
2.988_315.19139	POS	2.988	315.191	C18 H28 O3	4-hydroxy-6-[2-(2-methyl-1,2,4a,5,6,7,8,8a-octahydronaphthalen-1-yl)ethyl]oxan-2-one	75222.4	89.2356	level2	mzCloud										2.844e+06	2.16881e+06	3.83348e+06	3.81388e+06	3.33888e+06	3.88578e+06	3.19837e+06	4.15062e+06	2.43697e+06	2.32546e+06	3.03995e+06	5.01357e+06	3.63488e+06	4.59046e+06	4.86527e+06	2.14115e+06	5.47776e+06	1.62545e+06	2.94734e+06	2.76605e+06	50348.2	153111	50532.1	90369.1	220445	87732.3	423150	79716.3	268862	114173	1.05987e+06
2.993_225.07608	POS	2.993	225.076	C11 H12 O5	(2-Acetyl-3-hydroxy-5-methoxyphenyl)acetic acid	1.46535	75.0527	level2	mzCloud										9203.88	25877.3	16435.3	17734.7	17957.4	22148.7	15674.3	14736.1	15437.1	23313.2	80027.5	13902	29979.1	7243.36	14851.2	27340.9	13089.3	35470	23651.6	20087.6	268489	538318	777349	749341	575622	250478	159936	272690	188672	313113	756600
2.995_251.13919	POS	2.995	251.139	C13 H18 N2 O3	1,1-Dimethyl-2-oxopropyl N-[2-(2-pyridyl)ethyl]carbamate	0.670642	77.8975	level2	mzCloud										1.11671e+06	1.21968e+06	790404	1.32085e+06	871651	1.31193e+06	1.40229e+06	1.63864e+06	1.21504e+06	1.02718e+06	1.06452e+06	1.24173e+06	1.4363e+06	5.25831e+06	979890	1.84915e+06	2.04318e+06	969155	1.43792e+06	2.21582e+06	1.01005e+06	1.81267e+06	250287	1.29907e+06	1.07605e+06	1.89316e+06	1.42152e+06	777048	4.57611e+06	2.07891e+06	1.18729e+06
3.011_237.12393	POS	3.011	237.124	C12 H16 N2 O3	3-Morpholino-4-tetrahydro-1H-pyrrol-1-ylcyclobut-3-ene-1,2-dione	2.35524	73.4372	level2	mzCloud										995237	992118	3.44337e+06	802391	887341	2.01131e+06	2.06756e+06	1.22683e+06	467680	729560	2.72924e+06	882479	2.27267e+06	2.48352e+06	2.68498e+06	5.11612e+06	2.10612e+06	1.3336e+06	787422	3.6032e+06	4.04269e+06	1.65137e+06	1.87431e+06	1.21266e+06	2.35684e+06	2.65095e+06	2.55126e+06	4.4902e+06	1.38605e+06	3.31401e+06	1.20027e+06
3.029_175.08703	POS	3.029	175.087	C10 H10 N2 O	1-Phenyl-3-methyl-5-pyrazolone	2.53298	72.7565	level2	mzCloud										1.55453e+07	1.62985e+07	9.53847e+06	8.20509e+06	1.53018e+07	1.32191e+07	1.46164e+07	1.58053e+07	1.81473e+07	1.65555e+07	1.35616e+07	1.31851e+07	7.36972e+06	1.38053e+07	1.37385e+07	1.28743e+07	7.86617e+06	1.14054e+07	6.22176e+06	8.25803e+06	2.53043e+07	2.67627e+07	1.61603e+07	1.71969e+07	2.66697e+07	2.9117e+07	2.87052e+07	1.84765e+07	1.22074e+07	1.0866e+07	1.66631e+07
3.033_448.20555	POS	3.033	448.206	C16 H27 N9 O5	RNH	51702.9	81.897	level2	mzCloud										1.44833e+06	674950	467024	660513	579043	1.80152e+06	1.27599e+06	729495	1.06298e+06	1.30103e+06	925579	1.18718e+06	286074	1.97054e+06	1.66536e+06	647844	1.50836e+06	1.09604e+06	1.14564e+06	703923	6.71501e+06	5.64052e+06	5.52827e+06	3.00868e+06	1.29973e+07	1.01225e+07	5.99449e+06	8.70472e+06	6.8211e+06	6.24485e+06	637635
3.069_238.10765	POS	3.069	238.108	C12 H15 N O4	5-Methoxy methylone	1.11026	61.002	level2	mzCloud										2.1271e+06	1.44834e+06	2.80566e+06	2.10592e+06	2.44656e+06	2.62876e+06	2.51879e+06	2.51445e+06	2.68085e+06	3.32865e+06	1.84813e+06	2.37724e+06	1.67812e+06	2.74387e+06	1.7197e+06	1.89811e+06	1.93825e+06	2.50436e+06	2.25982e+06	1.85066e+06	1.67096e+06	3.78399e+06	3.18885e+06	1.68109e+06	3.00457e+06	3.15237e+06	1.59776e+06	3.29682e+06	915325	1.64034e+06	1.23465e+06
3.073_267.13404	POS	3.073	267.134	C14 H14 N6	N,N-dimethyl-N'-(3-phenyl[1,2,4]triazolo[4,3-b]pyridazin-6-yl)iminoformamide	-4.61561	65.0688	level2	mzCloud										3.52685e+06	3.54534e+06	4.59775e+06	3.01471e+06	3.2169e+06	8.65343e+06	4.27715e+06	4.50127e+06	4.29591e+06	4.44261e+06	2.37191e+06	5.4434e+06	3.83246e+06	5.48245e+06	2.68748e+06	4.10177e+06	6.02296e+06	3.64263e+06	6.04926e+06	3.54981e+06	2.16296e+06	2.74761e+06	1.43899e+06	2.01174e+06	2.53362e+06	3.45546e+06	2.30069e+06	2.52431e+06	1.94676e+06	1.3525e+06	4.06526e+06
3.082_345.13079	POS	3.082	345.131	C19 H22 O7	(3aS,4S,5S,11aR)-6-formyl-5-hydroxy-10-(hydroxymethyl)-3-methylidene-2-oxo-2H,3H,3aH,4H,5H,8H,9H,11aH-cyclodeca[b]furan-4-yl 2-methylprop-2-enoate	-49741	79.8053	level2	mzCloud										235620	57153.7	129285	24381	54945.3	233591	216902	112311	254250	78552.9	227228	117463	137909	70216.2	84482.8	120021	65951.4	250085	78234.3	136911	141737	69105.2	352173	337019	218545	323004	96547.8	391663	77664.1	43354.7	85210.8
3.085_283.16527	POS	3.085	283.165	C14 H22 N2 O4	2-(3-{[3-(Tetrahydro-2H-pyran-4-ylamino)-3-oxetanyl]methyl}-1,2-oxazol-5-yl)ethanol	0.145523	70.7465	level2	mzCloud										1.54744e+07	1.19322e+07	1.42105e+07	1.46632e+07	1.26359e+07	1.49476e+07	1.15519e+07	1.42243e+07	1.34056e+07	1.35722e+07	9.88638e+06	1.65254e+07	1.27633e+07	1.61826e+07	1.26818e+07	1.2548e+07	1.73238e+07	1.30901e+07	1.89178e+07	1.52313e+07	2.9232e+06	833814	494649	479711	913733	1.34439e+06	1.88054e+06	3.94473e+06	1.46395e+06	694670	5.55796e+06
3.093_311.16019	POS	3.093	311.16	C18 H24 O3	Estriol	76275	76.2721	level2	mzCloud										2.39933e+06	1.76292e+06	2.69504e+06	2.6785e+06	2.35296e+06	2.43324e+06	1.95519e+06	2.67007e+06	2.04381e+06	2.12304e+06	2.02952e+06	3.1445e+06	1.9591e+06	2.32955e+06	2.22962e+06	2.30647e+06	3.62992e+06	2.76108e+06	2.95892e+06	2.1426e+06	483213	310778	588796	439913	511548	200139	526609	735933	241749	2.82444e+06	934366
3.115_300.16660	POS	3.115	300.167	C12 H23 N5 O5	GNK	-56785.3	62.0991	level2	mzCloud										2.88183e+06	3.64544e+06	4.82933e+06	5.09964e+06	4.89431e+06	4.34046e+06	3.9715e+06	2.90572e+06	3.78335e+06	3.82835e+06	2.32334e+06	3.51361e+06	2.57879e+06	2.21407e+06	3.17849e+06	2.68188e+06	4.2797e+06	3.88841e+06	4.75312e+06	3.2386e+06	33167.7	33504.6	35705.5	29321.7	31919.8	36664.2	32159.5	31790.8	49469.1	43217.2	30615.2
3.115_359.07721	NEG	3.115	359.077	C17 H14 O6	NP-004020	146477	63.9083	level2	mzCloud										7319.39	7163.1	6923.82	7277.79	6663.19	6525.89	7344.82	6222.96	6770.4	7135	7337.95	6884.07	6485.79	7078.45	6561.78	6440.44	7112.55	6774.32	7043.73	6148.34	24491.5	13164.5	15048.4	14358.8	15131.8	13160.2	12277.5	15085	13063.9	13203.9	15129.1
3.117_325.02431	POS	3.117	325.024	C14 H10 N2 O4 S	N-(2-hydroxy-1,3-dioxo-2,3-dihydro-1H-inden-2-yl)-2-methyl-1,3-thiazole-4-carboxamide	72775.8	74.8565	level2	mzCloud										2.60851e+06	1.53009e+06	3.01739e+06	2.656e+06	1.15825e+06	2.75876e+06	2.98072e+06	3.98114e+06	2.91566e+06	1.91661e+06	1.25938e+06	4.49448e+06	2.74523e+06	1.05573e+06	1.78046e+06	1.93069e+06	1.82663e+06	1.98991e+06	3.21218e+06	1.89939e+06	326682	230076	232807	171003	280251	208067	172139	259438	280348	231912	1.0924e+06
3.133_244.04618	POS	3.133	244.046	C10 H11 N3 O2	3-(4-methoxyphenyl)-1-methyl-1H-1,2,4-triazol-5-ol	185064	62.7761	level2	mzCloud										912059	1.52524e+06	1.32399e+06	1.86752e+06	1.45172e+06	1.25287e+06	844678	1.57989e+06	1.47482e+06	1.46677e+06	1.87007e+06	2.04636e+06	731282	1.84876e+06	1.44313e+06	1.28327e+06	767276	1.56926e+06	998536	1.24828e+06	1.62846e+06	2.33818e+06	929177	739673	1.6332e+06	2.24113e+06	1.80716e+06	1.31936e+06	1.92081e+06	2.96789e+06	738665
3.144_269.14968	POS	3.144	269.15	C16 H24 O3	NP-004038	83204.7	79.5299	level2	mzCloud										5.42106e+06	5.33993e+06	2.39874e+06	2.53238e+06	6.32286e+06	3.86301e+06	5.16798e+06	6.85104e+06	4.63984e+06	5.79903e+06	4.9092e+06	2.86585e+06	2.97272e+06	1.91643e+06	4.68648e+06	6.96902e+06	6.28177e+06	6.25261e+06	4.70336e+06	7.85342e+06	2.42098e+06	1.19274e+07	2.91115e+06	906491	6.80191e+06	7.01605e+06	7.84216e+06	1.81444e+07	1.25573e+07	3.64297e+06	3.1366e+06
3.146_346.16480	POS	3.146	346.165	C19 H20 O5	2-{7-oxo-2H,3H,7H-furo[3,2-g]chromen-2-yl}propan-2-yl 3-methylbut-2-enoate	51889.2	82.0572	level2	mzCloud										1.57894e+07	1.385e+07	1.65136e+07	1.53412e+07	1.27232e+07	2.50611e+07	1.7021e+07	2.0019e+07	2.03335e+07	1.87809e+07	1.26183e+07	2.49758e+07	1.4663e+07	1.58487e+07	1.3464e+07	1.73529e+07	2.19911e+07	1.91021e+07	3.18107e+07	1.737e+07	490474	312633	314094	648387	437946	68314.6	71504.5	32071.4	49359	106231	2.6849e+06
3.151_341.17074	POS	3.151	341.171	C17 H20 N6 O2	1,3,7-trimethyl-8-[2-(1-methyl-2-phenylethylidene)hydrazino]-3,7-dihydro-1H-purine-2,6-dione	-3.86228	61.2151	level2	mzCloud										4.85649e+06	3.04816e+06	5.64401e+06	4.89134e+06	4.41677e+06	5.12412e+06	4.66612e+06	6.14614e+06	5.65101e+06	3.33075e+06	3.01605e+06	5.85024e+06	4.19743e+06	5.36049e+06	4.01886e+06	6.64778e+06	8.9611e+06	6.95673e+06	8.95596e+06	4.59352e+06	236978	267477	383485	426356	767741	82618.9	89068.3	414683	151292	464916	1.79803e+06
3.177_283.12888	POS	3.177	283.129	C13 H18 N2 O5	1-morpholino-3-(4-nitrophenoxy)propan-2-ol	0.119002	67.2269	level2	mzCloud										4.08805e+06	4.05203e+06	5.09432e+06	3.48123e+06	5.00004e+06	4.55237e+06	3.70945e+06	5.2775e+06	4.92954e+06	3.43703e+06	2.3033e+06	5.17211e+06	3.86306e+06	4.12511e+06	2.45565e+06	2.32275e+06	4.84722e+06	2.26302e+06	4.51118e+06	2.70952e+06	1.98833e+06	4.42558e+06	1.56419e+06	3.9911e+06	2.62405e+06	2.1158e+06	313313	395872	631937	1.54588e+06	2.43608e+06
3.177_306.11964	POS	3.177	306.12	C16 H17 N3 O2	NP-001501	77632.6	61.1851	level2	mzCloud										1.17638e+06	494775	588334	305327	705024	126840	296235	250911	135747	261294	436612	259812	349318	994025	516057	222090	138822	285634	65719.1	134814	190928	1.91853e+06	95893.4	61871.9	455675	2.36233e+06	1.65492e+06	783375	396629	691028	42889.5
3.235_266.17513	POS	3.235	266.175	C15 H20 O3	(3aR,5S,7S,8aR,9aR)-7-hydroxy-5,8a-dimethyl-3-methylidene-2H,3H,3aH,5H,6H,7H,8H,8aH,9H,9aH-naphtho[2,3-b]furan-2-one	68616.6	75.4604	level2	mzCloud										157627	202465	367556	175273	125066	631079	439963	480228	507929	258127	152107	325680	216602	173208	379748	908195	1.36539e+06	1.03074e+06	979438	865719	55535.6	26180.8	16037.9	32253.3	48348.6	18592.1	23487.9	19383.4	37638	30881.8	2.36208e+06
3.237_255.13408	POS	3.237	255.134	C15 H20 O2	(4aR,5R,6R)-6-hydroxy-4a,5-dimethyl-3-(prop-1-en-2-yl)-2,4a,5,6,7,8-hexahydronaphthalen-2-one	94683.7	71.9968	level2	mzCloud										3.5921e+06	2.65536e+06	3.76711e+06	4.8338e+06	4.54063e+06	6.03797e+06	7.52515e+06	6.74496e+06	5.64679e+06	4.1794e+06	2.9619e+06	5.80207e+06	5.39999e+06	4.64746e+06	4.55827e+06	7.27631e+06	4.06108e+06	7.58545e+06	6.35445e+06	6.05533e+06	4.6626e+06	4.86008e+06	6.55167e+06	4.13635e+06	5.27985e+06	4.55055e+06	1.69393e+06	4.48655e+06	1.65888e+06	1.30411e+06	6.50267e+06
3.245_359.26519	POS	3.245	359.265	C17 H34 N4 O4	VLK	-0.253883	70.1397	level2	mzCloud										84430.2	40905.3	17744.5	40854.9	11914.3	42179.7	50733.8	57536.7	34392.2	43588.6	31230.6	39262.9	28232.8	63032	46169.7	69191.5	89290.2	52468.9	96754.6	41226.2	1.57702e+06	710814	1.26381e+06	533184	875663	2.6176e+06	1.08095e+06	3.32051e+06	300116	139600	183754
3.279_355.15001	POS	3.279	355.15	C19 H24 O5	1-[2-hydroxy-4-(3-hydroxy-5-methylphenoxy)-6-methylphenyl]-3-methylbutane-2,3-diol	66173.5	84.3274	level2	mzCloud										576259	1.01263e+06	728079	738835	1.49804e+06	581828	1.50488e+06	940481	2.91868e+06	1.34199e+06	646022	760127	626733	720729	2.27855e+06	546328	800223	838672	867530	1.37343e+06	1.73083e+06	321624	431696	1.17459e+06	1.60221e+06	335853	1.90274e+06	863832	3.20238e+06	933379	1.53471e+06
3.282_249.12350	POS	3.282	249.124	C13 H16 N2 O3	1-(3-methoxy-2-nitrostyryl)pyrrolidine	0.531576	61.6213	level2	mzCloud										507612	924152	377919	332487	378760	1.72396e+06	409326	987251	1.52138e+06	1.68006e+06	428034	335241	1.22722e+06	479764	662613	993237	991349	1.67498e+06	883240	305183	582386	1.40487e+06	623226	2.39157e+06	1.6426e+06	574762	655043	683128	987683	1.73439e+06	1.32704e+06
3.285_309.18090	POS	3.285	309.181	C16 H24 N2 O4	N-(2,5-diethoxy-4-morpholinophenyl)acetamide	0.058956	68.3627	level2	mzCloud										3.34091e+07	2.56862e+07	3.39819e+07	3.59426e+07	2.54713e+07	2.57462e+07	2.73132e+07	2.91368e+07	2.29835e+07	2.47242e+07	1.74467e+07	3.36895e+07	2.4612e+07	3.62258e+07	1.81728e+07	2.27094e+07	3.45502e+07	2.90912e+07	2.94475e+07	2.06713e+07	195452	353022	177401	114845	307857	291527	872502	166948	492892	1.54962e+06	1.05267e+06
3.287_355.18631	POS	3.287	355.186	C17 H23 N O6	1-{[1-(3,5-dimethoxyphenyl)-1-methylethoxy]carbonyl}pyrrolidine-2-carboxylic acid	50500.9	74.6236	level2	mzCloud										1.72564e+06	1.05623e+06	1.81027e+06	2.93993e+06	971821	760363	996160	1.32826e+06	1.02611e+06	842901	1.03768e+06	1.2633e+06	1.1214e+06	1.07186e+06	1.13935e+06	1.11895e+06	2.76406e+06	1.7012e+06	1.79469e+06	1.11958e+06	243299	104288	87868.3	269388	176928	258465	141949	186920	96491.4	353038	370117
3.307_282.13364	POS	3.307	282.134	C14 H19 N O5	4-[(3,4-dimethoxyphenethyl)amino]-4-oxobutanoic acid	0.156625	63.9969	level2	mzCloud										7.46148e+06	5.25842e+06	8.29781e+06	9.5593e+06	6.40979e+06	6.85856e+06	4.54462e+06	6.60875e+06	5.26909e+06	4.3264e+06	5.00525e+06	9.6563e+06	6.04287e+06	5.98544e+06	5.70946e+06	5.25349e+06	6.34399e+06	6.01132e+06	6.7838e+06	4.10318e+06	224666	947218	256488	817785	305489	673887	203915	127228	2.72886e+06	414960	1.22978e+06
3.331_285.13469	POS	3.331	285.135	C15 H16 N4 O2	methyl 2-cyano-3-{1-[3-(1H-imidazol-1-yl)propyl]-1H-pyrrol-2-yl}acrylate	0.295324	66.3391	level2	mzCloud										27580.6	19524.8	84191.4	58511.2	133073	13934.3	74570.6	53732.2	107422	47784.1	32200.4	18593.1	30050.7	34099.4	24684.4	11738.6	28576.6	47680.3	25038.5	28388.2	244363	21404.5	21629.2	134107	25717	135892	124047	31264.9	39105.6	105813	19175.3
3.352_270.11259	POS	3.352	270.113	C16 H12 O3	1-oxo-2,3-dihydro-1H-inden-4-yl benzoate	67545.1	65.3548	level2	mzCloud										208842	319890	412560	616605	612318	1.1895e+06	341151	393409	236093	144159	243966	424756	123689	516452	991075	430694	203426	261220	84558.5	414156	1.28051e+07	1.33808e+07	8.7143e+06	3.31095e+06	1.54305e+07	5.28865e+06	8.67697e+06	1.82271e+07	1.19841e+07	6.60954e+06	698753
3.36_276.12308	POS	3.36	276.123	C15 H17 N O4	NP-020215	0.153073	80.9098	level2	mzCloud										67213.7	182533	77335.1	69862.2	81519.5	251052	139125	104928	153362	97700.4	86825.5	121149	19806.4	87433	101422	78888.1	57502.9	135496	75866	72580.3	895508	672846	249131	356596	313381	231156	240068	407696	863134	259164	197888
3.368_156.10225	POS	3.368	156.102	C8 H13 N O2	methyl 1-methyl-1,2,5,6-tetrahydropyridine-3-carboxylate hydrobromide	2.21299	78.1761	level2	mzCloud										2.65504e+06	6.16751e+06	3.09385e+06	2.76734e+06	2.10089e+06	3.17716e+06	2.16963e+06	3.36701e+06	3.56848e+06	3.61814e+06	3.37084e+06	5.74758e+06	4.34489e+06	5.91417e+06	6.40049e+06	4.45325e+06	6.23687e+06	2.62809e+06	4.86548e+06	4.32677e+06	5.03862e+06	7.29627e+06	5.68975e+06	4.63374e+06	3.18536e+06	5.34876e+06	4.93306e+06	6.52934e+06	9.75181e+06	8.13315e+06	2.69373e+06
3.368_439.21101	POS	3.368	439.211	C25 H28 N4 O2	3-[(1R,9S)-11-(1-Acetyl-4-piperidinyl)-6-oxo-7,11-diazatricyclo[7.3.1.02,7]trideca-2,4-dien-5-yl]benzonitrile	52814.5	78.7508	level2	mzCloud										1193.59	1282.33	1306.96	1320.16	1123.64	19434.3	11208.6	22260.1	23467.6	23437.7	1110.09	1221.06	1166.52	1078.43	1237.99	706472	1262.03	646296	916880	780198	1232.67	1031.89	1748.74	925.717	1480.71	1475.48	1048.27	1989.59	1152.52	1171.08	838.993
3.392_279.13409	POS	3.392	279.134	C14 H18 N2 O4	diethyl 2-{[(6-methyl-2-pyridyl)amino]methylidene}malonate	0.573104	83.5894	level2	mzCloud										2.81055e+06	4.55424e+06	4.44273e+06	1.85391e+07	7.54296e+06	1.13837e+06	1.38552e+06	3.7912e+06	1.97922e+06	2.19999e+06	2.02401e+06	1.82585e+06	2.21399e+06	2.32658e+06	3.51332e+06	1.47733e+06	2.34383e+06	2.10105e+06	1.00697e+06	2.5621e+06	1.0078e+06	1.0458e+06	694205	491947	1.9219e+06	742183	798048	889720	730168	962964	3.05037e+06
3.396_197.08182	NEG	3.396	197.082	C10 H14 O4	(-)-Camphanic acid	-0.578341	91.6436	level2	mzCloud										148560	427995	176650	298574	265216	191297	179176	250369	569768	193405	282903	362163	357898	403893	218748	637795	163898	329054	1.17631e+06	329341	74069.3	49888.6	198607	231925	167735	145732	62154.9	497781	29759.6	141720	141630
3.397_405.20526	POS	3.397	405.205	C24 H30 O4	7-{[(1S,4aS,6S,8aR)-6-hydroxy-5,5,8a-trimethyl-2-methylidene-decahydronaphthalen-1-yl]methoxy}-2H-chromen-2-one	57516.3	70.7051	level2	mzCloud										5479.37	4481.81	4333.44	4495.6	3949.01	6081.37	4324.73	4242.34	4654.01	4422.4	3592	4900	4023.17	4912.75	4329.8	426792	4258.13	586794	623660	581708	3424.39	3135.19	3733.16	3318.44	3979.84	4006.13	3002.62	6003.04	3644.64	3839.72	3305.09
3.401_346.11470	POS	3.401	346.115	C18 H17 N3 O3	1-[1,1'-biphenyl]-4-yl-2-(2-methyl-4-nitro-1H-imidazol-1-yl)-1-ethanol	68024.1	64.1318	level2	mzCloud										147650	135524	251546	192765	176935	157784	164479	76327.2	100593	120095	155769	218381	116822	209796	183068	214045	203510	196969	191127	220128	1.81071e+06	1.27102e+06	687055	1.40571e+06	1.00359e+06	1.3882e+06	1.10081e+06	1.46248e+06	879037	524195	1.97424e+06
3.407_341.18169	POS	3.407	341.182	C15 H26 N4 O6	DPK	-50283.8	80.0032	level2	mzCloud										410407	556529	338004	448646	537957	576152	268215	781852	469233	327760	413960	870984	597724	565911	607660	498405	1.38601e+06	929144	648675	433896	32656.3	19307.3	35376.2	38702.3	16591.7	44231	33034.5	26399.6	16390.5	19563.9	189469
3.416_259.10789	POS	3.416	259.108	C14 H14 N2 O3	ethyl 4-[(6-methyl-3-pyridazinyl)oxy]benzoate	0.655986	73.243	level2	mzCloud										4.80561e+06	3.40182e+06	3.88381e+06	2.60084e+06	1.83856e+06	2.04772e+06	2.71716e+06	2.48351e+06	2.05641e+06	3.70099e+06	1.64722e+06	2.16368e+06	1.55616e+06	2.70711e+06	1.50564e+06	2.41384e+06	749623	3.59728e+06	1.00065e+06	1.9802e+06	521166	3.92584e+06	239632	258335	1.39233e+06	1.1992e+06	908099	2.33249e+06	655938	762775	612276
3.424_271.14435	POS	3.424	271.144	C16 H18 N2 O2	Furanyl norfentanyl	0.912157	72.3178	level2	mzCloud										7574.03	9910.07	9183.14	6860.73	6731.7	9355.85	7017.24	7232.99	7596.06	19490.2	7385.92	7546.43	6648.96	7373.34	12925.5	6757.59	7145.61	7685.88	8004.65	6839.66	51623.8	425582	101951	18325.7	286459	108817	207419	774733	274016	265760	5405.44
3.435_252.13446	POS	3.435	252.134	C12 H17 N3 O3	ethyl 2-cyano-3-[(2-oxoazepan-3-yl)amino]acrylate	0.766581	62.1701	level2	mzCloud										98861.7	118272	501764	56558	238770	361180	111697	206171	43487.1	159385	50529.2	158595	301733	57141.6	93086	225473	326768	319285	155025	615935	185394	162626	560952	300153	240965	102227	92725.6	160141	156018	106892	908597
3.441_319.12898	POS	3.441	319.129	C16 H24 O4	(1S,6R,11aR,13R,14aS)-1,13-dihydroxy-6-methyl-1H,4H,6H,7H,8H,9H,11aH,12H,13H,14H,14aH-cyclopenta[f]oxacyclotridecan-4-one	135470	79.3029	level2	mzCloud										3.36685e+06	1.89436e+06	868274	3.62611e+06	1.49775e+06	2.89415e+06	432730	1.40553e+06	2.93538e+06	727750	1.31487e+06	3.64142e+06	1.39445e+06	3.58259e+06	1.19445e+06	1.52715e+06	664449	1.76397e+06	3.1684e+06	1.555e+06	1.2975e+06	1.35252e+06	2.8072e+06	2.84202e+06	6.52835e+06	1.4172e+06	4.80862e+06	1.02984e+06	4.27738e+06	2.32231e+06	983206
3.444_341.20695	POS	3.444	341.207	C20 H30 O3	(2Z)-5-(1,2,4a,5-tetramethyl-7-oxo-1,2,3,4,4a,7,8,8a-octahydronaphthalen-1-yl)-3-methylpent-2-enoic acid	69072.4	84.3485	level2	mzCloud										889665	672302	931743	616526	622920	664712	560492	911010	771028	545910	465200	668985	436681	615570	318092	592931	662417	584136	781413	301583	18940.9	12307	16204	32454.7	20778	18735.8	39657.3	51820.1	37654.5	108370	162456
3.46_281.18635	POS	3.46	281.186	C15 H24 N2 O3	NP-020712	1.36392	67.4279	level2	mzCloud										88953.1	131617	168621	310449	289105	521249	231782	355401	334600	624850	96705.7	199842	128204	294446	112052	270854	344056	153132	212663	181850	707386	15980.9	46606.3	493358	302411	20361.6	16280.8	550987	1.20216e+06	22146.9	178908
3.465_319.15135	POS	3.465	319.151	C16 H24 O5	NP-022469	74221.8	73.7229	level2	mzCloud										602543	956278	381570	139220	302333	731392	935807	360023	991744	776480	1.02526e+06	406674	203600	298820	212958	513696	232408	1.74062e+06	662171	334878	7.99157e+06	4.41429e+06	4.22922e+06	6.00718e+06	7.14991e+06	2.93755e+06	2.41003e+06	2.35992e+06	1.7852e+06	1.89959e+06	1.47451e+07
3.47_242.08472	POS	3.47	242.085	C11 H15 N O3 S	3-hydroxy-4-(3-toluidino)tetrahydro-1H-1lambda~6~-thiophene-1,1-dione	0.74765	62.4885	level2	mzCloud										570625	765890	736400	1.17381e+06	509135	844015	825736	1.14548e+06	1.08253e+06	627381	771932	1.01708e+06	1.03369e+06	971951	791300	907606	1.28957e+06	1.13833e+06	1.17247e+06	1.15218e+06	47380.2	13304.1	17140	44281.4	25530.9	16646.6	31437	20885	13805.1	18593.4	323222
3.487_188.10740	POS	3.487	188.107	C12 H13 N O	2-[(Dimethylamino)methylidene]indan-1-one	2.17624	73.7318	level2	mzCloud										2.45148e+07	1.49276e+07	8.90882e+06	7.44083e+06	6.85226e+06	3.65501e+07	2.31254e+07	1.0743e+07	1.7647e+07	1.41241e+07	1.67324e+07	9.57574e+06	4.50462e+06	1.24533e+07	1.11833e+07	1.37478e+07	3.00021e+06	1.87318e+07	7.75178e+06	1.74442e+07	560806	1.51371e+06	1.16672e+06	719334	1.9856e+06	1.34268e+07	1.63566e+07	6.84992e+06	5.13862e+06	8.00546e+06	3.33594e+06
3.49_271.16534	POS	3.49	271.165	C13 H19 N O4	N-[1-(4-methoxy-2-oxo-2H-pyran-6-yl)-2-methylbutyl]acetamide	67264.1	75.1432	level2	mzCloud										2.5829e+07	1.91123e+07	1.48739e+07	7.66934e+06	1.66372e+07	1.8322e+07	1.59146e+07	1.28148e+07	3.1463e+07	2.32424e+07	1.29398e+07	2.41259e+07	1.10308e+07	2.27061e+07	6.43733e+06	2.75535e+07	3.44004e+06	1.26556e+07	1.35729e+07	1.9476e+07	3.16798e+06	4.91432e+06	3.97281e+06	2.82441e+06	2.96722e+06	3.9748e+06	723762	1.00922e+06	1.4653e+06	5.42293e+06	1.25376e+07
3.496_211.14442	POS	3.496	211.144	C11 H18 N2 O2	NP-011220	1.51429	75.1508	level2	mzCloud										1.32446e+06	1.43115e+06	2.25089e+06	1.18563e+06	1.45589e+06	1.5631e+06	1.33268e+06	1.4478e+06	1.63184e+06	3.07845e+06	1.0673e+06	1.16326e+06	1.15216e+06	1.30523e+06	1.21592e+06	1.30926e+06	1.16085e+06	1.48574e+06	1.2095e+06	1.10371e+06	3.00207e+06	6.93489e+06	1.60873e+06	1.80619e+06	3.2891e+06	3.03843e+06	3.55064e+06	7.2446e+06	1.23634e+07	2.91608e+07	1.19304e+06
3.499_195.11322	POS	3.499	195.113	C10 H14 N2 O2	Nikethamide 1-oxide	2.15143	71.5371	level2	mzCloud										3.08432e+06	4.57426e+06	5.18352e+06	2.90655e+06	4.49415e+06	4.9245e+06	4.12518e+06	5.37416e+06	7.36719e+06	7.56204e+06	6.70754e+06	5.94457e+06	3.68836e+06	5.80185e+06	5.91926e+06	4.04354e+06	2.85686e+06	1.80298e+06	2.69768e+06	8.77945e+06	2.87811e+06	3.31946e+06	1.26106e+07	1.03368e+07	6.89253e+06	6.70551e+06	6.13162e+06	5.54812e+06	1.42612e+07	9.91194e+06	1.89008e+06
3.505_407.11190	POS	3.505	407.112	C21 H20 O7	5-[(Benzoyloxy)methyl]-4,5,6-trihydroxy-2-cyclohexen-1-yl benzoate	57231.3	66.3131	level2	mzCloud										1.32823e+07	1.31692e+07	1.32985e+07	6.29616e+06	1.35234e+07	6.62896e+06	5.49538e+06	9.12974e+06	9.17441e+06	5.26708e+06	1.34308e+06	2.43963e+06	3.07057e+06	4.67795e+06	3.6525e+06	801458	4.86016e+06	1.85572e+06	2.41546e+06	4.08142e+06	426284	278014	448713	247404	541573	568213	447123	654526	422185	468901	214548
3.512_326.15977	POS	3.512	326.16	C16 H20 O6	NP-016564	55258.3	60.9584	level2	mzCloud										43329.4	47450.3	44609	84468.6	45380.1	40535.8	59153.2	57606.1	53357.7	11510.9	19719.6	39567.4	101472	23901.9	14539.6	120033	127531	48480.3	105513	55320.8	18772.5	6623.09	30043.3	11516.1	22527.6	26831.2	24605.5	18288.9	24517.3	7159.15	976246
3.529_328.09605	POS	3.529	328.096	C16 H16 F3 N O S	5-(tert-butyl)-N-[4-(trifluoromethyl)phenyl]thiophene-2-carboxamide	-5.1734	65.4169	level2	mzCloud										768654	638620	973952	1.0457e+06	758691	746128	772263	857782	657841	724055	577110	841295	805242	758745	763883	873019	1.49086e+06	1.16328e+06	996856	897415	14574.7	13990.9	17289	14204.6	16566.4	19508.7	13443.3	26142.1	14785.6	15903.9	9616.14
3.531_466.16139	POS	3.531	466.161	C22 H22 F3 N3 O5	1,4:3,6-Dianhydro-2-[(benzylcarbamoyl)amino]-2-deoxy-5-O-{[3-(trifluoromethyl)phenyl]carbamoyl}-D-glucitol	6.35035	72.3985	level2	mzCloud										1.06963e+06	1.50531e+06	1.15331e+06	2.16446e+06	1.38619e+06	1.52645e+06	2.34483e+06	1.29536e+06	684086	2.01252e+06	1.33206e+06	1.08688e+06	803214	1.45026e+06	1.88015e+06	1.97091e+06	1.57522e+06	2.05302e+06	2.36637e+06	1.1512e+06	8.08881e+06	4.58913e+06	5.34492e+06	4.70672e+06	7.26271e+06	5.07196e+06	3.28042e+06	1.85572e+06	2.04961e+06	2.29561e+06	1.76225e+06
3.532_240.10203	POS	3.532	240.102	C15 H13 N O2	4,4'-dimethoxy[1,1'-biphenyl]-2-carbonitrile	0.539638	75.367	level2	mzCloud										352110	459772	442727	119481	292747	922840	780723	904954	1.28436e+06	762332	715953	565945	193058	540945	796203	559071	389576	353731	408001	698178	398940	1.73152e+06	388064	157038	927973	757752	2.41438e+06	8.98995e+06	1.84681e+07	2.59462e+07	1.20382e+06
3.535_196.06080	POS	3.535	196.061	C9 H9 N O4	5-(acetylamino)-2-hydroxybenzoic acid	1.89421	76.11	level2	mzCloud										1.08739e+06	1.11756e+06	1.04641e+06	1.03607e+06	771743	998700	847195	165540	821487	860325	812274	292637	1.14135e+06	126499	902404	552816	751827	958179	1.05586e+06	618162	2.82689e+06	1.53925e+06	1.69274e+06	2.8886e+06	1.74826e+06	893805	1.20522e+06	848274	1.54737e+06	882054	3.11064e+06
3.536_355.19741	POS	3.536	355.197	C21 H26 N2 O3	methyl 18-hydroxy-3,13-diazapentacyclo[11.8.0.0脗?,脗a芒聛掳.0芒聛麓,芒聛a.0脗a芒聛碌,脗?芒聛掳]henicosa-2(10),4,6,8-tetraene-19-carboxylate	-11.8722	80.5096	level2	mzCloud										5.83653e+06	3.47984e+06	5.71219e+06	5.68224e+06	3.83022e+06	5.91826e+06	4.97377e+06	5.38738e+06	6.84281e+06	3.09435e+06	3.49781e+06	8.62598e+06	4.37003e+06	7.4129e+06	4.06961e+06	6.1294e+06	7.27124e+06	4.1604e+06	6.97378e+06	3.92971e+06	80261.1	42129.4	85987.4	65406	56465.2	79727.2	19295.4	37873.5	20876.9	24532.2	1.30991e+06
3.537_256.00294	POS	3.537	256.003	C11 H10 Cl N S2	4-{[(4-chlorophenyl)thio]methyl}-2-methyl-1,3-thiazole	5.26353	68.8181	level2	mzCloud										711674	543197	421639	1.08958e+06	1.26143e+06	769536	770002	775853	806276	702514	628202	1.13936e+06	788967	1.55798e+06	843685	766380	1.02256e+06	723158	916429	565423	2.4262e+06	2.74697e+06	2.41818e+06	2.42296e+06	2.03944e+06	1.66292e+06	1.42197e+06	1.51344e+06	993413	1.51049e+06	1.01385e+06
3.543_286.10740	POS	3.543	286.107	C16 H15 N O4	3,4-dihydroxy-4-(4-methoxyphenyl)-1,2,3,4-tetrahydroquinolin-2-one	0.046722	74.249	level2	mzCloud										46953.7	53385.8	18456.1	222750	88022.9	173576	155575	57561.8	22732.1	21795.3	34850.3	128444	80085.2	158856	60715.4	119548	104434	132876	32417.2	160122	544514	1.68031e+06	626151	139857	342870	850058	747979	2.69816e+06	1.93022e+06	5.71759e+06	82072.2
3.547_187.14465	POS	3.547	187.145	C18 H36 N4 O4	LLK	-499999	64.2291	level2	mzCloud										1.36144e+06	1.83192e+06	1.34798e+06	2.37985e+06	2.28221e+06	2.81495e+06	1.84591e+06	1.71713e+06	2.92471e+06	4.53107e+06	1.14408e+06	1.73584e+06	1.2698e+06	2.52349e+06	1.38792e+06	1.56673e+06	1.60086e+06	2.62966e+06	1.16416e+06	1.60801e+06	963189	649045	1.20368e+06	1.19576e+06	822046	2.07794e+06	1.94739e+06	1.11948e+06	1.53313e+06	1.69601e+06	735687
3.548_319.16512	POS	3.548	319.165	C17 H24 N2 O5	N-{4-[(2R,3R)-3-(Hydroxymethyl)-4-isopropyl-5-oxo-2-morpholinyl]phenyl}-2-methoxyacetamide	-53576.3	71.2198	level2	mzCloud										3.27925e+06	2.50819e+06	2.93445e+06	3.79659e+06	2.90022e+06	3.48786e+06	3.16518e+06	3.76772e+06	3.1242e+06	3.12927e+06	2.6851e+06	3.77802e+06	3.5355e+06	3.33085e+06	2.75047e+06	2.70851e+06	3.91858e+06	2.70814e+06	3.38148e+06	2.54848e+06	145473	131669	20382.6	33543.5	47390.9	24057.6	86514.6	66289.3	151302	165369	896447
3.559_433.11355	NEG	3.559	433.114	C21 H22 O10	4H-1-Benzopyran-4-one, 6-beta-D-glucopyranosyl-2,3-dihydro-5,7-dihydroxy-2-(4-hydroxyphenyl)-, (S)-	-1.07557	73.7257	level2	mzCloud										66883.1	58392.7	34221.7	44294.5	27370.7	67972.2	50844.6	48610.3	62118	46261.6	75077.1	38547.2	38892.4	51673.4	31217.2	66307.3	28081.9	36285.8	40029	44715.6	385297	631778	416957	1.025e+06	256300	359872	275974	201603	217290	234429	274879
3.565_327.11850	POS	3.565	327.118	C17 H20 O5	(1S,8S,9S,10S,13R)-6,9,10-trimethyl-2-oxo-4,14-dioxatetracyclo[7.5.0.0脗a,脗a脗l.0脗l,芒聛路]tetradeca-3(7),5-dien-8-yl acetate	72272	81.161	level2	mzCloud										167049	232742	485464	202790	150873	117261	241572	157721	135503	141922	179206	76336.9	186975	214669	574676	110101	530398	231578	89713.6	147292	26397.6	67738.8	36343.6	62061.1	45275.9	31732	51498.4	13186.8	59576.4	88972.1	172530
3.589_270.11251	POS	3.589	270.113	C16 H15 N O3	4-[N-(p-Methoxy-benzylidene)amino]-phenyl acetate	0.140622	65.3981	level2	mzCloud										12142.4	28806.4	93760.6	10539.7	23922.6	8944.64	8697.62	8596.58	8903.09	74565.9	23001.3	8543.88	7881.15	8654.12	26497.9	12675.9	8140.22	9474.07	9651.88	8336.1	42985.7	835179	46097.8	7717.57	149078	402198	606492	1.77642e+06	319915	847461	6097.59
3.6_207.07672	POS	3.6	207.077	C10 H10 N2 O3	4-Hydroxy-2-(2-hydroxyethyl)-1,2-dihydrophthalazin-1-one	1.46302	76.8508	level2	mzCloud										6.57141e+06	7.73305e+06	7.77036e+06	7.29857e+06	8.57223e+06	7.05563e+06	7.43464e+06	7.17796e+06	7.27236e+06	7.31973e+06	7.47198e+06	7.0877e+06	8.29172e+06	7.08304e+06	5.92687e+06	6.27416e+06	5.92671e+06	6.68247e+06	5.80914e+06	6.84151e+06	166756	1.1207e+06	190207	123095	178345	74074.7	78499.9	73888.2	462459	169098	5.55801e+06
3.622_194.08158	POS	3.622	194.082	C10 H11 N O3	N1-(2,3-dihydro-1,4-benzodioxin-6-yl)acetamide	2.10843	60.0601	level2	mzCloud										1.87636e+06	1.68255e+06	1.86036e+06	1.04742e+06	842303	1.77708e+06	2.3318e+06	1.49598e+06	2.13606e+06	2.56255e+06	1.02813e+06	1.7297e+06	1.51397e+06	854246	1.80305e+06	1.38313e+06	1.10487e+06	967723	1.41397e+06	1.8651e+06	301234	1.03408e+06	826427	816123	347028	570922	535248	655965	1.34501e+06	1.26875e+06	295415
3.627_261.12342	POS	3.627	261.123	C14 H16 N2 O3	3-[(4-hydroxyphenyl)methyl]-octahydropyrrolo[1,2-a]pyrazine-1,4-dione	0.247196	86.9921	level2	mzCloud										4.39037e+06	5.32902e+06	5.01587e+06	6.30276e+06	5.51854e+06	4.92248e+06	4.89103e+06	4.77088e+06	5.12855e+06	4.46498e+06	3.55552e+06	3.33877e+06	4.71919e+06	3.1052e+06	3.25688e+06	6.07221e+06	5.11258e+06	6.93848e+06	5.18452e+06	6.89369e+06	979424	2.01305e+06	1.49038e+06	1.53259e+06	1.3403e+06	1.88289e+06	1.52412e+06	2.35186e+06	1.72028e+06	970538	571121
3.635_206.08211	NEG	3.635	206.082	C11 H13 N O3	4-morpholinobenzoic acid	-0.767861	83.1242	level2	mzCloud										49912.3	45794	52820.9	16578.8	39105.9	47693.5	86314.8	63063.8	60522.4	59919.3	31728.1	29108.9	36254.2	30982.5	37247.8	92746.9	32827.2	73816.9	83250.1	110842	16420.3	20041.9	11594.9	12060.4	21894	32873.6	11795.5	34027.2	13503.9	17190.1	14816.9
3.639_299.08085	POS	3.639	299.081	C11 H14 N4 O4 S	NP-003319	-0.00697184	88.1126	level2	mzCloud										1.52833e+06	578843	2.94784e+06	1.05611e+06	1.26341e+06	562358	1.14358e+06	589335	1.11111e+06	304857	470874	274011	150561	626688	1.09188e+06	715032	2.88831e+06	2.22519e+06	1.24643e+06	1.14245e+06	421547	344067	671239	258299	1.56684e+06	523503	661797	998697	1.43516e+06	947763	2.3189e+06
3.659_205.13377	POS	3.659	205.134	C12 H16 N2 O	2,7,7-trimethyl-5,6,7,8-tetrahydroquinolin-5-one oxime	1.14681	67.7269	level2	mzCloud										591510	478959	1.08267e+06	665157	1.38426e+06	525690	352573	418061	234614	842744	568184	534468	661685	805280	710907	349763	632696	1.14463e+06	323423	771981	172821	213370	43409.7	39533.3	204178	186000	210942	363837	128137	153869	149200
3.668_243.11293	POS	3.668	243.113	C14 H14 N2 O2	morpholino(quinolin-6-yl)methanone	0.520632	84.3155	level2	mzCloud										593877	520529	391668	133725	470617	778554	655610	599068	929970	1.15339e+06	324258	491462	270464	416019	443031	412497	228366	274641	341651	117828	1.78874e+06	1.41993e+06	901411	657885	1.96793e+06	1.8864e+06	1.21726e+06	1.29324e+06	1.62287e+06	1.89549e+06	383982
3.67_321.18076	POS	3.67	321.181	C17 H24 N2 O4	N-{4-[(2R,3R)-3-(Hydroxymethyl)-4-methyl-5-oxo-2-morpholinyl]phenyl}-2,2-dimethylpropanamide	-0.377235	67.6076	level2	mzCloud										601668	796639	771438	928496	749229	1.46665e+06	1.1835e+06	1.68545e+06	865180	1.1516e+06	1.11993e+06	1.5473e+06	693508	840490	707459	895362	1.40036e+06	627705	1.05066e+06	671519	227111	122695	75774.1	82886.3	204963	106443	489256	228627	586638	888897	596556
3.674_373.23322	POS	3.674	373.233	C21 H34 O4	5-[5-(methoxycarbonyl)-5,8a-dimethyl-2-methylidene-decahydronaphthalen-1-yl]-3-methylpentanoic acid	62756.6	76.5868	level2	mzCloud										34666.9	44266.1	11856.4	48328.8	46079.5	34653.4	10821.2	10063	12398.3	12050.9	8834.29	15190.4	15300.2	42802.8	22303.2	13627.3	11406.3	15879.3	13649	9121.49	881817	261098	27324.6	358639	227358	410737	177120	30910.5	16568	11257.7	109489
3.675_305.07683	POS	3.675	305.077	C15 H16 N2 O S2	4-(1,3-Dithian-2-yliden)-3-methyl-1-(4-methylphenyl)-4,5-dihydro-1H-pyrazol-5-one	-2.80272	67.9753	level2	mzCloud										125844	100842	94260.7	69689.7	42893.4	68953.4	71341.2	125898	132304	51593.8	49974.2	41230.7	32560.2	34888.9	46894.2	122086	29858.6	123364	83360.2	71534.5	40340.4	85641.8	582757	1.59979e+06	73438.9	195987	37839	5.16573e+06	50054.6	17609.1	31163.6
3.689_306.09056	POS	3.689	306.091	C17 H17 N O S	2-[(1-benzothiophen-3-ylmethyl)amino]-1-phenylethan-1-ol	77640.3	63.0816	level2	mzCloud										276696	364936	426766	768960	530823	236608	295736	451551	460374	457999	176638	351920	351062	275934	193801	263527	341997	240002	279060	272035	13448.6	13992.2	20601.1	15290.1	17512.3	14064.5	10137.1	17874.3	13661	15017.1	12439.1
3.692_250.18023	POS	3.692	250.18	C15 H23 N O2	O-Desmethyl-cis-tramadol	0.294037	69.015	level2	mzCloud										67263.9	98446.2	121476	79214.7	97970.3	109949	116970	165805	123535	122558	135578	183891	263168	139309	171295	108235	104014	92091.9	86032.9	92368.3	1.45036e+06	1.56323e+06	1.39276e+06	2.04499e+06	1.51267e+06	108130	45303	54848.9	69502.9	144449	39760.5
3.705_225.11308	NEG	3.705	225.113	C12 H20 O5	3,8,9-trihydroxy-10-propyl-3,4,5,8,9,10-hexahydro-2H-oxecin-2-one	-1.14576	82.5029	level2	mzCloud										5.5801e+06	5.99063e+06	5.79383e+06	8.52167e+06	5.6305e+06	7.22374e+06	6.13355e+06	6.52121e+06	6.8281e+06	5.92878e+06	1.62721e+07	6.30264e+06	7.88891e+06	6.72615e+06	5.65866e+06	5.92734e+06	5.20113e+06	6.14244e+06	1.85567e+07	6.63693e+06	7.96851e+06	4.33084e+06	8.59807e+06	4.77651e+06	4.75081e+06	7.04888e+06	1.77522e+06	8.09065e+06	1.50297e+06	2.27108e+06	7.78304e+06
3.707_264.10915	POS	3.707	264.109	C14 H15 N3 O	N1-[2-(2-pyridyl)ethyl]-2-aminobenzamide	91158.9	77.4435	level2	mzCloud										456985	913884	1.87104e+06	1.94093e+06	1.31208e+06	1.18469e+06	1.25505e+06	2.36587e+06	1.35976e+06	904497	1.17219e+06	1.44064e+06	1.56733e+06	1.01142e+06	1.88799e+06	1.27338e+06	2.90615e+06	1.35567e+06	1.02239e+06	1.79422e+06	344366	188097	248756	273145	263196	200551	148869	29841.6	150622	31539.4	639712
3.707_314.17097	POS	3.707	314.171	C14 H25 N3 O6	2-[2-(2-acetamido-4-methylpentanamido)propanamido]-3-hydroxypropanoic acid	-54384.2	62.5867	level2	mzCloud										1.08357e+06	1.1135e+06	862129	909522	1.24944e+06	1.26821e+06	1.17578e+06	1.12624e+06	1.16419e+06	1.30399e+06	656906	1.06644e+06	910588	867013	671590	967386	577059	866639	1.0181e+06	967448	2.10488e+06	1.8462e+06	2.38364e+06	2.00904e+06	2.29107e+06	1.23747e+06	941357	1.05886e+06	718038	662397	2.52465e+06
3.709_265.10468	POS	3.709	265.105	C12 H18 O5	NP-020400	90791.3	73.0857	level2	mzCloud										5184.53	4012.14	4107.4	3794.21	3531.54	5064.93	3893.53	3623.1	5025.73	4145.08	3158.16	4724.57	3538.98	4379.59	3667.97	4127.82	3997.28	4008.13	5210.06	4020.83	10430	67037.1	528801	31776	93102.9	27679.7	26688.6	80780.7	3581.56	4025.42	5914.12
3.711_260.13941	POS	3.711	260.139	C14 H17 N3 O2	N1-(4-Hydroxy-6-methylquinazolin-2-yl)-2,2-dimethylpropanamide	0.236685	65.4405	level2	mzCloud										3.28155e+07	3.06903e+07	2.16245e+07	2.0997e+07	2.19489e+07	2.34238e+07	2.58407e+07	2.27738e+07	2.67198e+07	2.74075e+07	2.8724e+07	3.30827e+07	2.15447e+07	3.1266e+07	2.48602e+07	4.51642e+07	1.72597e+07	3.32484e+07	3.19659e+07	2.56852e+07	2.52208e+07	1.65209e+07	1.72991e+07	1.12907e+07	4.80878e+07	1.54761e+07	1.14527e+07	8.17921e+06	9.61008e+06	1.37344e+07	8.71387e+06
3.714_339.15499	POS	3.714	339.155	C19 H24 O4	4-{3-[(4-hydroxy-3-methoxyphenyl)methyl]-2-methylbutyl}benzene-1,2-diol	69520.9	63.9274	level2	mzCloud										1.88309e+06	1.95306e+06	1.99251e+06	3.26208e+06	1.5662e+06	3.08735e+06	1.51301e+06	3.03977e+06	1.7197e+06	1.33579e+06	1.36552e+06	1.73895e+06	1.53857e+06	1.51815e+06	1.61657e+06	1.81601e+06	1.84571e+06	1.78464e+06	3.42826e+06	1.26212e+06	621099	656968	573965	608043	586013	279502	756665	819515	795364	757321	946957
3.718_232.09700	POS	3.718	232.097	C13 H13 N O3	5-(benzyloxy)-2-(hydroxymethyl)-1,4-dihydropyridin-4-one	0.780226	60.805	level2	mzCloud										1.48834e+06	2.13898e+06	3.94759e+06	2.44177e+06	2.58692e+06	1.71554e+06	1.26247e+06	1.66908e+06	896614	2.84368e+06	1.75642e+06	352094	761272	2.11383e+06	2.91148e+06	1.82715e+06	155685	1.92401e+06	456671	1.15221e+06	3.04701e+07	5.46506e+07	1.76819e+07	1.58239e+07	2.76859e+07	1.76789e+07	1.65918e+07	3.60498e+07	3.47896e+07	2.72697e+07	341683
3.718_258.16019	POS	3.718	258.16	C15 H19 N3 O	5?amino?3,3?dimethyl?6?[(1E)?2?(4?methylphenyl)diazen?1?yl]cyclohexa?1,5?dien?1?ol	0.38097	76.3027	level2	mzCloud										684742	1.05479e+06	553273	804085	656191	797752	704577	818655	794452	1.15947e+06	779669	896008	553651	935124	602115	810782	484851	1.59004e+06	467345	1.2782e+06	22627.6	28854	23385.1	19149.1	24575.6	255158	354537	102487	55417.7	56117.6	413294
3.724_355.18629	POS	3.724	355.186	C20 H28 O4	9-hydroxy-7-(2-hydroxypropan-2-yl)-1,4a-dimethyl-1,2,3,4,4a,9,10,10a-octahydrophenanthrene-1-carboxylic acid	66166	72.7339	level2	mzCloud										1.50781e+06	1.97069e+06	1.43276e+06	2.91563e+06	2.03134e+06	2.87035e+06	3.35697e+06	5.92119e+06	3.7311e+06	2.64257e+06	2.08473e+06	2.05299e+06	2.14692e+06	1.84611e+06	1.77595e+06	2.43335e+06	2.43088e+06	2.85485e+06	2.74052e+06	996820	489534	60682.9	590955	618042	446150	275327	153439	529237	189362	373362	1.58164e+06
3.739_266.13872	POS	3.739	266.139	C14 H16 O4	(5S,6S)-5-hydroxy-4-methoxy-6-(2-phenylethyl)-5,6-dihydro-2H-pyran-2-one	68626.6	62.111	level2	mzCloud										1.74691e+06	1.76208e+06	2.12275e+06	1.6149e+06	1.86961e+06	1.09049e+06	1.60664e+06	1.83239e+06	1.84623e+06	1.8977e+06	1.61515e+06	1.83837e+06	1.85748e+06	1.57379e+06	1.58066e+06	1.2761e+06	1.69706e+06	1.37436e+06	1.44476e+06	1.35672e+06	370787	336233	186730	382095	243326	304322	68618.5	160367	300903	240696	458853
3.75_311.16012	POS	3.75	311.16	C15 H22 N2 O5	2-[(2S,3R,4S,5R)-5-(Aminomethyl)-3,4-dihydroxytetrahydro-2-furanyl]-N-(4-methoxybenzyl)acetamide	-0.107013	72.7257	level2	mzCloud										4.00465e+06	5.06708e+06	7.17871e+06	7.15896e+06	4.29636e+06	7.74964e+06	7.504e+06	9.91095e+06	8.40267e+06	5.42304e+06	4.3552e+06	1.01846e+07	5.47912e+06	6.20362e+06	4.31272e+06	8.21451e+06	1.46783e+07	6.39958e+06	1.13489e+07	5.71412e+06	141546	300200	390330	138874	494958	398573	230825	511855	160943	418291	2.92925e+06
3.751_205.09744	POS	3.751	205.097	C11 H12 N2 O2	ethyl 1-methylpyrrolo[1,2-a]pyrazine-7-carboxylate	1.37971	82.6508	level2	mzCloud										1.9194e+06	3.0037e+06	2.22097e+07	7.91402e+06	5.24868e+06	408831	658440	808789	375308	4.36566e+06	2.22564e+06	843725	1.00022e+06	2.03421e+06	3.11963e+06	2.58217e+06	408874	4.71953e+06	378016	1.35355e+06	3.65876e+06	4.07904e+07	2.7023e+06	1.70897e+06	8.7853e+06	1.6294e+07	1.06987e+07	1.94409e+07	1.86654e+06	4.70842e+06	201381
3.761_261.11273	NEG	3.761	261.113	C15 H20 O5	(2E)-2-(hydroxymethyl)-3-[3-oxo-5-(propan-2-yl)-1,3,4,5,6,7-hexahydro-2-benzofuran-4-yl]prop-2-enoic acid	-64295.2	73.0492	level2	mzCloud										108599	157633	123643	204433	118932	102902	108481	172647	101432	114239	136488	111726	121130	91383.1	79168.9	136879	97330.1	105458	96941.2	80407.1	185358	161980	206799	205274	202084	178298	97533.9	101177	69355	75913	99740.2
3.767_189.06618	POS	3.767	189.066	C10 H8 N2 O2	4-(1H-imidazol-1-yl)benzoic acid	1.74704	78.6133	level2	mzCloud										858.521	862.602	1074.59	1022.85	1020.34	1322.96	1013.31	1012.06	1302.75	1529.56	712.316	910.535	805.85	941.234	836.451	1328.57	871.128	1812.98	1408.03	1967.43	919.264	857.97	1033.75	708.189	978.591	1015.83	688.519	1096.68	832.032	930.252	1056.04
3.767_260.07405	POS	3.767	260.074	C14 H13 N O2 S	ethyl 2-amino-8H-indeno[2,1-b]thiophene-3-carboxylate	0.27364	60.9696	level2	mzCloud										8.5294e+06	1.17507e+07	9.19392e+06	1.12474e+07	1.41388e+07	1.15004e+07	1.18457e+07	1.0927e+07	1.40936e+07	8.59752e+06	1.40022e+07	1.57878e+07	7.07827e+06	1.74277e+07	1.34863e+07	9.39831e+06	7.0589e+06	1.03371e+07	7.45797e+06	1.35583e+07	1.22353e+07	1.19364e+07	4.294e+06	3.06695e+06	8.84935e+06	1.19084e+07	1.19445e+07	9.7812e+06	1.72641e+07	3.87969e+07	6.06172e+06
3.773_335.16007	POS	3.773	335.16	C17 H22 N2 O5	(4aR,7aR)-6-(1,3-Benzodioxol-5-ylmethyl)-4-(2-methoxyethyl)hexahydropyrrolo[3,4-b][1,4]oxazin-3(2H)-one	-0.235115	75.796	level2	mzCloud										1.0213e+06	1.68625e+06	1.68389e+06	1.28451e+06	1.15761e+06	2.5331e+06	1.65082e+06	2.73318e+06	2.60545e+06	1.4773e+06	1.60856e+06	3.21077e+06	1.71208e+06	1.89163e+06	1.0446e+06	1.8028e+06	3.43384e+06	1.11893e+06	2.26472e+06	1.35888e+06	145894	153630	152543	259027	523064	253361	402015	348899	371568	961529	792414
3.778_223.10792	POS	3.778	223.108	C11 H14 N2 O3	1-(2-methoxy-4-nitrophenyl)pyrrolidine	0.995136	70.477	level2	mzCloud										2.01171e+07	1.68676e+07	3.14353e+07	3.11743e+07	2.4378e+07	1.54079e+07	2.00316e+07	2.38639e+07	1.73428e+07	1.74914e+07	2.07676e+07	2.31139e+07	2.35305e+07	2.13029e+07	1.81615e+07	1.59917e+07	3.35712e+07	1.95273e+07	1.82379e+07	1.6188e+07	1.83944e+06	1.54165e+07	1.21681e+06	1.04323e+06	3.78063e+06	5.86847e+06	4.72231e+06	7.37404e+06	1.14493e+06	2.42432e+06	9.41809e+06
3.798_254.11760	POS	3.798	254.118	C16 H15 N O2	4-[2-(2-methylphenyl)-2-oxoethyl]benzamide	0.190152	66.8454	level2	mzCloud										5.60284e+06	1.39107e+07	1.93993e+07	1.49098e+07	1.17183e+07	1.11067e+07	9.53795e+06	9.74575e+06	8.51911e+06	1.70076e+07	1.00954e+07	6.08696e+06	2.77983e+06	7.08534e+06	1.79471e+07	1.3819e+07	2.07e+06	9.01611e+06	3.28595e+06	1.93848e+07	3.40596e+07	1.07582e+08	5.06745e+07	1.54917e+07	9.1421e+07	4.23534e+07	7.96837e+07	1.60646e+08	8.19617e+07	8.71519e+07	4.54803e+06
3.802_265.15469	POS	3.802	265.155	C14 H20 N2 O3	2-(2-amino-3-methylbutanamido)-3-phenylpropanoic acid	0.0824189	74.4429	level2	mzCloud										3.34059e+06	2.42981e+06	2.3223e+06	2.91532e+06	1.98841e+06	2.37023e+06	2.1688e+06	1.83497e+06	1.71779e+06	1.86237e+06	1.78976e+06	1.33564e+06	1.59417e+06	1.62088e+06	2.05169e+06	2.49e+06	1.94851e+06	1.94896e+06	1.62475e+06	2.59001e+06	6.63856e+06	4.09362e+06	8.43721e+06	9.8436e+06	9.53995e+06	6.32551e+06	2.92965e+06	1.29187e+07	1.62439e+06	2.07773e+06	3.19545e+06
3.803_276.06152	POS	3.803	276.062	C12 H9 N3 O5	N'2-(2-hydroxybenzylidene)-5-nitrofuran-2-carbohydrazide	0.0742189	61.1352	level2	mzCloud										937272	922969	1.14441e+06	1.23931e+06	1.02649e+06	964101	1.03613e+06	1.15861e+06	956106	787049	991548	1.05866e+06	1.07887e+06	1.02219e+06	1.02642e+06	911296	1.08696e+06	932430	911996	997289	86568.5	34345	15756	41241.8	53398.2	44850.5	96039.9	22142.2	64667.1	47063.9	302156
3.804_265.08197	POS	3.804	265.082	C12 H18 O4	NP-020401	167849	62.788	level2	mzCloud										430490	502056	503682	284036	376770	273902	306167	295124	276573	345256	361640	253152	355479	270473	398899	374696	384003	398049	482557	244095	402903	247871	166570	299818	222304	185347	122052	52968.1	140330	131370	1.37246e+06
3.835_350.24377	POS	3.835	350.244	C19 H31 N3 O3	2-{(3R,4S)-3-[(5-Butyl-1,2-oxazol-3-yl)methyl]-4-piperidinyl}-1-(4-morpholinyl)ethanone	-0.151345	62.2122	level2	mzCloud										12091.4	11255.7	10377	12717.4	27769.1	29077.9	11384.7	13529.8	15123.8	11386.1	12871.5	13939.4	28176.1	11893.8	9702.81	36837.3	10610	55532.5	64766.8	19721	57177.3	14344.1	31223.3	48135.7	46724.3	316616	111805	71440	36963.9	30359	40430.4
3.838_217.09738	POS	3.838	217.097	C12 H12 N2 O2	2,3,4,9-Tetrahydro-1H-beta-carboline-3-carboxylic acid	1.05464	90.3402	level2	mzCloud										1.83577e+07	2.05475e+07	2.00503e+07	2.16449e+07	2.04844e+07	2.49303e+07	2.18301e+07	2.26913e+07	2.11963e+07	2.23575e+07	2.20576e+07	2.87732e+07	2.80487e+07	2.258e+07	1.97969e+07	2.31844e+07	2.39172e+07	2.45429e+07	2.53826e+07	2.70863e+07	1.56717e+07	1.26695e+07	1.83641e+07	1.682e+07	1.3682e+07	1.27677e+07	9.52842e+06	1.22496e+07	9.73247e+06	8.42437e+06	1.8859e+07
3.855_305.17068	POS	3.855	305.171	C16 H26 O4	NP-016386	77893.7	71.5943	level2	mzCloud										765408	729710	376571	594757	808465	1.03508e+06	620094	605129	726155	1.7239e+06	624654	460220	594777	332594	391871	479141	204673	699749	681879	703650	3.5505e+06	5.66444e+06	1.32796e+07	5.23362e+06	9.5864e+06	3.04718e+06	2.07312e+06	3.68221e+06	445120	1.1821e+06	595483
3.857_307.17642	POS	3.857	307.176	C15 H22 N4 O3	(S)-N-alpha-benzoylarginine ethyl ester	-0.154757	73.2717	level2	mzCloud										219629	240897	339810	413619	198222	610504	511856	367189	385266	447987	324200	187445	188386	110855	355551	1.68208e+06	648554	341386	629317	249813	323722	442810	1.71378e+06	1.24772e+06	2.01604e+06	1.0473e+06	883639	1.49828e+07	142955	196739	488203
3.86_187.05121	NEG	3.86	187.051	C10 H8 N2 O2	6-methyl-5-nitroquinoline	-0.47506	81.863	level2	mzCloud										356.107	340.133	353.862	366.606	325.981	304.731	350.784	297.692	409.213	315.876	331.007	362.978	365.344	340.01	378.119	312.208	403.487	368.116	385.394	335.59	324.489	308.92	298.088	298.41	290.106	281.833	313.54	375.446	422.233	428.002	645.74
3.861_208.06070	POS	3.861	208.061	C10 H9 N O4	5-(2-Nitroprop-1-enyl)-1,3-benzodioxole	1.28511	72.652	level2	mzCloud										2.63286e+07	3.88153e+07	2.50429e+07	3.3385e+07	4.32156e+07	4.32882e+07	3.88131e+07	3.23733e+07	3.96306e+07	4.15318e+07	4.25269e+07	3.55922e+07	3.53213e+07	2.6572e+07	2.94086e+07	4.43163e+07	3.04619e+07	4.64207e+07	5.11084e+07	3.75554e+07	7.39973e+08	3.40863e+08	7.51577e+08	8.83484e+08	5.52716e+08	3.52103e+08	2.78794e+08	2.6504e+08	2.24337e+08	1.78487e+08	3.15357e+08
3.876_325.17578	POS	3.876	325.176	C16 H30 O4	NP-001596	132607	78.6975	level2	mzCloud										5.79654e+07	7.25907e+07	9.76864e+07	1.36335e+08	8.08626e+07	1.69829e+08	1.40733e+08	1.9932e+08	1.78393e+08	1.02705e+08	1.09605e+08	1.7919e+08	1.72903e+08	1.25949e+08	1.30455e+08	9.6007e+07	1.68982e+08	1.05006e+08	1.40789e+08	8.76532e+07	5.00641e+06	1.91057e+06	3.03509e+06	4.26318e+06	3.27627e+06	1.40807e+06	1.56017e+06	1.38668e+06	1.58875e+06	926444	1.03839e+08
3.879_267.17038	POS	3.879	267.17	C17 H24 O	Celestolide	90016.2	66.3023	level2	mzCloud										8.60291e+07	1.03646e+08	9.58024e+07	1.1377e+08	1.02614e+08	9.82914e+07	1.00264e+08	8.42983e+07	9.85791e+07	1.12312e+08	7.96241e+07	9.53226e+07	9.08654e+07	8.29188e+07	7.11736e+07	8.17375e+07	6.87534e+07	7.24792e+07	8.37393e+07	8.62747e+07	904367	706526	258331	679151	586517	1.71026e+06	1.81411e+06	788676	796621	1.40475e+06	2.98285e+06
3.888_413.17087	POS	3.888	413.171	C25 H26 O4	NP-020825	56333.8	61.9684	level2	mzCloud										7483.05	8294.87	9026.57	9844.71	9400.79	10715.6	9213.96	10805.6	11199	9412.88	8394.65	9977.32	10129.7	9398.5	10216.9	8073.96	9893.04	8857.13	10437.6	8963.56	18753	9573.52	12105.2	19199.8	11658.9	9369.36	6896.04	10141.7	7203.59	6596.07	176476
3.896_202.10836	NEG	3.896	202.108	C9 H17 N O4	3-[(methoxycarbonyl)amino]-2,2,3-trimethylbutanoic acid	-0.593809	68.1506	level2	mzCloud										682675	785251	603539	143700	810609	374820	601862	408019	555651	453682	299333	392849	201246	499079	218772	252428	585280	296478	316048	256524	376696	516671	1.3213e+06	481613	558979	2.46812e+06	2.5456e+06	4.15645e+06	818614	694610	712170
3.899_272.13940	POS	3.899	272.139	C15 H19 N3 O3	3-hydroxy-2-(3-nitro-4-piperidinobenzyl)propanenitrile	-62289.4	71.7557	level2	mzCloud										41518.6	190422	54998.3	32388.7	23008.4	146465	73409.3	146885	79100	155042	82291.1	148458	83516.2	24134.9	62947.8	449945	632284	172728	257566	380493	24597.4	125731	19904.1	28496.4	56510.3	30462.1	30211.9	72595.8	29749.4	13501.7	853573
3.93_229.09817	NEG	3.93	229.098	C13 H14 N2 O2	2,6-Dimethyl-5-(4-methylphenoxy)pyrimidin-4-ol	-0.341224	69.485	level2	mzCloud										3.64129e+06	3.66022e+06	607378	454818	2.17639e+06	2.0971e+06	2.22621e+06	1.49388e+06	2.26842e+06	7.63762e+06	5.50796e+06	2.31021e+06	2.88274e+06	3.34966e+06	1.98011e+06	2.98651e+06	1.15336e+06	2.69428e+06	3.27254e+06	2.83228e+06	535100	488985	692587	581752	689945	572519	432233	454723	398490	446800	694228
3.936_261.08706	POS	3.936	261.087	C13 H12 N2 O4	ethyl 3-(1,3-benzodioxol-5-ylamino)-2-cyanoacrylate	0.281531	60.1547	level2	mzCloud										478602	266872	240118	167779	168638	480867	472568	289736	504582	630952	237268	331933	402191	272149	388456	634687	278781	555504	582340	341007	1.17888e+06	1.5824e+06	2.08868e+06	1.57924e+06	1.68344e+06	1.02258e+06	698655	879358	224123	445789	1.06798e+06
3.939_413.25069	POS	3.939	413.251	C22 H38 O8	5-[2-(3,4-dihydroxy-2,5-dimethoxyoxolan-3-yl)ethyl]-5,6,8a-trimethyl-octahydro-2H-spiro[naphthalene-1,2'-oxirane]-2,3-diol	-41866.3	78.6058	level2	mzCloud										6309.75	5974.45	6524.45	5967.11	5262.24	12818	6259.45	5552.53	6203.62	6435.06	5020.55	6415.09	5062.03	6018.15	5494.07	5898.97	6546.03	6379.86	8254.04	6432.16	169619	24134.5	49800.1	458816	104797	130274	135648	66850.9	48080.7	20738.3	375112
3.942_247.14419	POS	3.942	247.144	C14 H15 N O2	N-allyl-2-(2-methyl-1-benzofuran-3-yl)acetamide	74316.3	82.9523	level2	mzCloud										4.35827e+06	3.87103e+06	4.42782e+06	2.90986e+06	3.68621e+06	3.54879e+06	2.74091e+06	4.22449e+06	3.11181e+06	2.66218e+06	4.53434e+06	3.21065e+06	2.76747e+06	3.75967e+06	4.18496e+06	2.64516e+06	4.42384e+06	2.37636e+06	2.25983e+06	3.07781e+06	469276	254347	270546	306128	236757	335266	208346	288788	466038	444883	976706
3.944_272.12818	POS	3.944	272.128	C16 H14 O3	NP-002897	67009	81.9149	level2	mzCloud										1.47749e+07	1.31015e+07	1.14634e+07	1.00331e+07	1.12988e+07	7.83007e+06	1.8172e+07	8.24544e+06	5.90012e+06	1.05733e+07	1.25567e+07	9.9201e+06	5.42671e+06	7.0303e+06	1.17754e+07	1.15963e+07	3.67812e+06	1.97625e+07	2.44857e+06	1.31211e+07	105629	282213	130775	54290.6	61520.9	1.75813e+06	3.22964e+06	742708	119252	744166	428868
3.958_218.08143	POS	3.958	218.081	C12 H11 N O3	4-hydroxy-5,8-dimethylquinoline-3-carboxylic acid	1.19121	76.8556	level2	mzCloud										324988	429741	341950	76430	176608	762191	134872	269730	485114	2.39291e+06	301045	639740	113886	430913	1.33149e+06	659205	384113	318106	126063	66775.7	278671	3.04978e+06	1.60361e+06	2.4326e+06	4.03411e+06	2.98961e+06	1.85221e+06	1.50621e+06	845134	1.32817e+06	118786
3.977_349.18687	POS	3.977	349.187	C20 H26 N2 O2	NP-009373	67382.6	69.5875	level2	mzCloud										42017.5	42280	106928	38063.4	63968.4	92842.2	78866.6	93177.1	54055.8	61120.5	27082.4	46140.9	28586	55710	58521.4	50387.6	124016	127261	74413.1	69790.7	73680.9	60183.9	74049.7	95846.9	91234.5	37814.6	29718.4	40063.6	12411.2	14374.7	93708
3.986_279.17021	POS	3.986	279.17	C15 H24 N2 O4	{3-[(3-{[4-(Hydroxymethyl)cyclohexyl]amino}-3-oxetanyl)methyl]-1,2-oxazol-5-yl}methanol	-60811.2	76.0601	level2	mzCloud										664160	707553	750229	550592	926796	667443	465227	575083	387396	792308	437851	582285	209929	613305	401752	447225	212446	410114	291166	372553	781938	1.20509e+06	507810	1.09265e+06	1.11462e+06	5.22942e+06	7.87305e+06	2.67731e+06	947540	2.40924e+06	339501
3.987_291.17028	POS	3.987	291.17	C16 H22 N2 O3	ethyl 1-(4-acetyl-2-aminophenyl)piperidine-4-carboxylate	-0.142553	74.7867	level2	mzCloud										681124	598314	1.42089e+06	1.24016e+06	1.15915e+06	641376	596503	944983	509188	425905	721801	843567	1.12114e+06	942086	886347	927127	1.55948e+06	752831	810968	773833	184635	177212	97687	27480.6	256287	208065	360530	301267	441067	485703	216701
3.989_225.12357	POS	3.989	225.124	C11 H16 N2 O3	Ethyl 2-[1-(3,5-dimethyl-2-furyl)ethylidene]hydrazine-1-carboxylate	0.918328	61.9693	level2	mzCloud										1.11004e+06	1.05428e+06	793060	2.16449e+06	1.43573e+06	1.12886e+06	1.19568e+06	842792	1.36304e+06	2.92533e+06	1.0091e+06	945890	1.62686e+06	1.10303e+06	1.9597e+06	659159	964796	2.64796e+06	1.53029e+06	653700	261654	388889	308140	809655	154882	1.07471e+06	1.23217e+06	636572	1.47687e+06	382933	5.11205e+06
3.997_308.18560	POS	3.997	308.186	C17 H22 O4	NP-000295	58681.4	74.4582	level2	mzCloud										1.5983e+06	1.30621e+06	1.78753e+06	1.50685e+06	1.61234e+06	4.43029e+06	1.21346e+06	1.38605e+06	1.42501e+06	1.30848e+06	1.17213e+06	1.59867e+06	1.50826e+06	1.44928e+06	1.38471e+06	1.28272e+06	1.75096e+06	1.45617e+06	1.58752e+06	1.52739e+06	212707	174410	90614.3	156140	116352	21337.5	25395.1	31185.3	35610.7	108495	440286
4.001_363.15500	POS	4.001	363.155	C21 H24 O4	2-hydroxy-4-methoxy-3-(3-methylbut-2-en-1-yl)-6-(2-phenylethyl)benzoic acid	64616	66.112	level2	mzCloud										2.28921e+06	1.53538e+06	2.80092e+06	706680	1.39361e+06	3.17331e+06	1.7233e+06	1.43097e+06	1.24405e+06	2.59264e+06	1.0554e+06	1.66351e+06	1.29745e+06	1.49252e+06	1.88234e+06	756344	4.99278e+06	759640	1.5933e+06	1.73444e+06	337484	170499	130720	146555	118684	117861	200370	66179.6	162999	62323.9	174722
4.025_348.19178	POS	4.025	348.192	C18 H25 N3 O4	1-[(1S,2S,3S,4R,5R)-3-Hydroxy-4-(1-piperidinyl)-6,8-dioxabicyclo[3.2.1]oct-2-yl]-3-phenylurea	-0.000163045	61.9485	level2	mzCloud										51184.3	44681.7	28788.4	201757	74393.4	69367.7	127980	38232.7	53539.9	61761.2	26883.3	37257.3	24397.8	56680.9	51659.8	139493	315651	409006	207052	88178.2	93636.5	132119	112628	145190	127588	168755	57962.8	70620.7	29216.1	42787.5	2.38432e+06
4.032_311.17540	POS	4.032	311.175	C19 H22 N2 O2	[4-(2-methoxyphenyl)piperazino](4-methylphenyl)methanone	-0.0154802	69.2128	level2	mzCloud										136241	746706	1.28343e+06	1.24896e+06	2.18526e+06	1.64576e+06	359442	596857	208553	864942	693759	935695	538623	1.06797e+06	1.23616e+06	607588	274917	1.59802e+06	141532	1.91897e+06	65031.5	18918.1	20703.2	19168.4	19955.3	321991	1.47295e+06	799723	219024	516475	76325.5
4.037_215.08172	POS	4.037	215.082	C12 H12 N2 O3	NP-020292	-77602.4	86.6553	level2	mzCloud										1.22891e+06	865862	753241	832716	902632	1.84327e+06	2.32666e+06	1.73021e+06	2.04129e+06	1.60277e+06	2.12851e+06	1.31835e+06	1.18492e+06	1.08616e+06	885743	2.2516e+06	465967	1.68036e+06	1.6568e+06	669846	4.60234e+06	2.82561e+06	4.38667e+06	3.19758e+06	4.69178e+06	4.63452e+06	2.63461e+06	3.86252e+06	3.95177e+06	3.03869e+06	3.11067e+06
4.044_234.12445	POS	4.044	234.124	C12 H15 N3 O2	N4-imino(phenyl)methylmorpholine-4-carboxamide	3.19207	65.4005	level2	mzCloud										3.10323e+06	2.89554e+06	3.03932e+06	3.92195e+06	3.57681e+06	2.50292e+06	2.61781e+06	2.82358e+06	2.79669e+06	2.80576e+06	2.893e+06	3.13911e+06	3.27499e+06	3.4073e+06	2.69189e+06	2.55105e+06	2.26042e+06	2.8684e+06	2.78275e+06	2.56592e+06	2.68865e+06	2.67745e+06	2.18127e+06	2.61286e+06	2.96016e+06	1.33067e+06	771578	126201	22808.6	24020	2.69399e+06
4.058_317.13845	POS	4.058	317.138	C18 H22 O6	NP-013229	-53900.7	64.0708	level2	mzCloud										9361.62	10608.5	9319.87	12468.6	10527.8	63454.2	33391.9	10138.9	23733.9	9449.52	10482	24998	9653.23	8207.36	9362.31	21471.5	34018.3	41003.5	66759.8	19721.3	108338	177794	1.18077e+06	193303	246782	128019	152592	215252	60711.7	62988.5	76045.4
4.06_297.10806	POS	4.06	297.108	C16 H18 O4	NP-015090	80184.7	61.8042	level2	mzCloud										729941	830297	289776	383131	311701	211816	336919	420785	441419	332841	370559	405202	402985	323878	340021	308985	189256	462435	378534	191114	23099.6	75148.2	62593.1	20495.3	23958.2	20699.2	25427.9	38045	27506.3	24923.5	1.25761e+06
4.067_391.19757	POS	4.067	391.198	C23 H26 N4 S	3-[5-(benzylthio)-4-methyl-4H-1,2,4-triazol-3-yl]-5-oct-1-ynylpyridine	6.34991	73.4968	level2	mzCloud										26305.7	28349.8	53625.1	37383.3	29124	151891	62189.7	75103.3	63729	46954.9	34118.9	21271.9	25172.5	24365	31747.5	500063	811497	485859	466672	304646	9925.39	9094.18	49607.9	26336.5	29900	33273.9	9822.68	28448.7	9352.33	10797.8	256214
4.068_245.12857	POS	4.068	245.129	C14 H16 N2 O2	N-benzyl-N,3,5-trimethylisoxazole-4-carboxamide	0.464807	63.1071	level2	mzCloud										226315	287237	392798	128251	281550	381703	231686	202111	236534	756256	206479	188382	515664	301428	256151	215372	370002	183122	216250	100431	505118	1.8478e+06	2.30552e+06	2.89706e+06	1.06448e+06	1.64151e+06	628272	4.20663e+06	3.39332e+06	515509	577911
4.083_349.13936	POS	4.083	349.139	C20 H22 O4	2-[1-(2H-1,3-benzodioxol-5-yl)propan-2-yl]-6-methoxy-4-(prop-2-en-1-yl)phenol	67392.8	80.9555	level2	mzCloud										1.64037e+07	2.41715e+06	1.92532e+07	2.07268e+07	1.91151e+07	1.61644e+06	578487	3.32321e+06	1.74985e+07	4.90789e+06	1.83291e+07	2.11656e+07	2.07458e+07	1.93448e+07	1.78698e+07	1.73773e+07	1.98475e+07	1.88316e+07	2.73092e+06	2.72952e+06	424910	622023	678808	805968	1.3664e+06	368381	1.16344e+06	1.08713e+06	713276	238831	1.01892e+06
4.087_169.07633	POS	4.087	169.076	C8 H9 F N2 O	3-Fluoro-N'-hydroxy-4-methylbenzenecarboximidamide	-5.00056	80.126	level2	mzCloud										4.55003e+06	2.85499e+06	2.87423e+06	2.56313e+06	2.68393e+06	2.43413e+06	2.62831e+06	1.73055e+06	2.05319e+06	2.76855e+06	2.34928e+06	3.90133e+06	2.68984e+06	4.52349e+06	1.84079e+06	2.19385e+06	1.68775e+06	2.18455e+06	2.50802e+06	1.39475e+06	1.77575e+06	1.39167e+06	1.48389e+06	908042	1.62274e+06	2.03981e+06	1.70775e+06	1.95018e+06	2.52202e+06	2.64e+06	768452
4.088_335.16026	POS	4.088	335.16	C17 H22 N2 O5	NP-008474	0.319778	70.9301	level2	mzCloud										755037	659370	1.26699e+06	202633	637774	1.35804e+06	631539	1.34298e+06	1.71583e+06	1.54699e+06	1.10047e+06	1.85318e+06	936749	1.3485e+06	1.10705e+06	1.62573e+06	2.37099e+06	1.49943e+06	1.42232e+06	783832	418243	3.4672e+06	1.20263e+06	1.30397e+06	1.72023e+06	1.43549e+06	517698	726343	723356	1.01504e+06	1.26682e+06
4.091_296.12803	POS	4.091	296.128	C18 H19 N O4	NP-020241	-57517.9	81.6825	level2	mzCloud										781267	1.21507e+06	664606	49180.3	1.00046e+06	580648	1.65766e+06	628951	559495	1.51285e+06	692559	901115	186248	704424	1.10306e+06	741675	80277.6	385995	193811	563768	571818	9.03875e+06	2.00175e+06	637476	3.20115e+06	590730	406745	611063	17157.6	88432.8	9806.08
4.125_204.13860	POS	4.125	204.139	C13 H17 N O	alpha-Pyrrolidinopropiophenone	1.50071	71.9686	level2	mzCloud										597467	326427	221910	241807	167470	495098	530764	369523	223239	739337	662332	968231	1.44932e+06	960055	529699	522232	238987	516561	590825	941928	10950.5	39714.8	48995	83882.4	36846.1	71802	67728.8	20328.2	16605.1	16710.4	88411.7
4.138_303.08630	POS	4.138	303.086	C16 H16 O7	2-hydroxy-6-[2-hydroxy-6-(hydroxymethyl)-4-methoxyphenoxy]-4-methylbenzoic acid	-56267.3	79.6777	level2	mzCloud										8.0829e+06	9.02887e+06	7.90284e+06	9.68949e+06	7.37099e+06	5.99736e+06	7.55509e+06	6.47404e+06	7.94918e+06	6.34714e+06	6.81145e+06	6.72818e+06	8.57831e+06	7.70153e+06	6.35366e+06	5.87757e+06	4.93976e+06	6.21006e+06	5.70192e+06	5.53136e+06	1.10482e+06	1.4805e+06	1.40355e+06	1.18154e+06	1.34986e+06	1.80466e+06	1.6274e+06	1.39725e+06	992279	1.0283e+06	1.36198e+06
4.154_503.25066	POS	4.154	503.251	C28 H36 N2 O5	(4aS,9aR)-7-[2-(2,3-Dimethoxyphenyl)ethyl]-2-[(4-methoxyphenyl)acetyl]decahydro-6H-pyrido[3,4-d]azepin-6-one	45768.7	76.2073	level2	mzCloud										5795.24	5008.88	5205.57	5565.46	4163.21	5542.06	5614.99	4765.91	5583.1	4948.37	3982.56	5919.25	4612.87	5462.35	4121.88	21117.6	4630.48	4583.06	5616.9	3513.16	2790.53	2149	3127.09	2697.29	2944.16	4669.1	2763.6	5220.94	2391.57	2655.16	15276.4
4.155_331.12178	NEG	4.155	331.122	C19 H16 N4 O2	1-benzyl-3-(2-methylphenyl)-3,7-dihydro-1H-purine-2,6-dione	5.20762	62.1546	level2	mzCloud										1.77448e+06	2.69541e+06	3.02575e+06	4.24491e+06	3.39986e+06	2.50171e+06	2.62707e+06	2.97466e+06	4.0352e+06	3.78338e+06	2.30644e+06	3.44057e+06	2.39942e+06	2.12332e+06	1.52859e+06	3.24607e+06	3.16339e+06	4.01782e+06	3.70309e+06	3.46221e+06	384890	361727	394397	634738	432968	206597	76295.9	221116	16874.1	17798.6	791319
4.171_277.07473	NEG	4.171	277.075	C14 H15 Cl N2 O2	ethyl 3-[(4-chlorophenethyl)amino]-2-cyanoacrylate	-0.709186	62.0399	level2	mzCloud										7640.12	6221.74	15014.7	3567.42	4777.17	28009.2	19608.6	17892.4	17330.6	17808.6	6973.04	9478.85	4604.91	3233.54	1906.03	40422.5	12324.7	42344.6	18273.7	16894.4	596360	471104	510010	441695	484333	314915	268703	125018	180494	250145	613603
4.173_143.11812	POS	4.173	143.118	C7 H14 N2 O	Nitrosoheptamethyleneimine	1.60886	66.0956	level2	mzCloud										83884.4	509850	142750	1.87121e+06	395105	33198.9	208201	509662	555841	133452	91626.6	199722	281070	332690	104201	785756	17524.5	887877	361127	38769.5	147517	217622	168742	452457	152888	2.02979e+06	832620	979267	58391.6	163828	165820
4.184_351.21740	NEG	4.184	351.217	C20 H34 O6	6,15-diketo-13,14-dihydro Prostaglandin F1?	-48647	89.305	level2	mzCloud										719640	555247	719097	227544	1.61237e+06	897728	1.44857e+06	1.93686e+06	1.36762e+06	887931	728680	777407	732896	1.2259e+06	599145	664296	727762	281946	580913	477073	9492.49	5820.12	4565.92	4523.74	5244.89	5343.11	5002.21	4185.08	6245.46	6589.54	19409.9
4.188_353.12723	NEG	4.188	353.127	C17 H23 Cl N2 O4	2-[(2S,3R,4S,5R)-5-{[(3-Chlorobenzyl)amino]methyl}-3,4-dihydroxytetrahydro-2-furanyl]-N-cyclopropylacetamide	-0.351175	62.6514	level2	mzCloud										299237	183753	835517	203148	237842	483090	394015	464719	366062	267903	182929	251111	213503	168297	498859	907792	1.53942e+06	1.0296e+06	989789	1.43323e+06	186542	125849	404899	521357	167159	101637	82330.7	98181.9	17075.9	26126.9	2.26987e+06
4.198_249.15984	POS	4.198	249.16	C14 H20 N2 O2	N1-(2,6-dimethylphenyl)-2-morpholinoacetamide	0.348068	82.5643	level2	mzCloud										285042	247023	429225	355426	345820	494281	420861	576533	415733	485281	363537	394799	414311	306994	456728	757725	1.16327e+06	731794	672543	770437	100495	53218.5	38588.1	77718	80056.6	108258	103852	271274	75505.8	118994	639150
4.216_359.13814	POS	4.216	359.138	C22 H18 N2 O3	8-methoxy-1-(3-methoxyphenyl)-3-oxo-3,4,5,6-tetrahydrobenzo[f]quinoline-2-carbonitrile	-2.4563	62.0017	level2	mzCloud										65837.9	38384.7	62392.6	85901.4	69823.8	79149.9	92005	125453	97256.8	37915.2	64861.2	83001.4	59720.6	62066	85007.2	153184	323926	194123	208476	145139	9538.1	7769.08	10449.9	9595.29	9715.52	9355.78	7743.09	12354.7	10017.3	8386.03	60133.3
4.218_266.13874	POS	4.218	266.139	C14 H19 N O4	N-(2,6-Dimethylphenyl)-N-(methoxyacetyl) alanine	0.191705	69.0522	level2	mzCloud										969805	879051	677599	479879	1.42532e+06	3.37119e+06	758817	1.6827e+06	2.50945e+06	2.14623e+06	672075	1.01545e+06	490132	1.95592e+06	1.25187e+06	689572	1.31969e+06	526477	750519	458971	7.77183e+06	1.21174e+07	6.76083e+06	7.64971e+06	1.56169e+07	1.15675e+07	1.05876e+07	2.06149e+07	1.11032e+07	1.0475e+07	4.97519e+06
4.22_203.11827	POS	4.22	203.118	C12 H14 N2 O	10b-methyl-1,5,6,10b-tetrahydroimidazo[2,1-a]isoquinolin-2(3H)-one	1.88621	69.3712	level2	mzCloud										43013.1	76958.8	42868.4	34252.3	46989.8	218473	62059.5	144797	222904	173746	41290.3	194332	82892.8	73323.8	88998.7	105147	70860.7	46821.1	131288	111016	247655	366269	340575	230128	506210	203270	250622	570275	181736	396214	121017
4.227_258.11256	POS	4.227	258.113	C15 H17 N O4	NP-006878	-65465.1	71.8816	level2	mzCloud										28767.5	49001.5	93055.4	76624.8	90035.1	83545.6	28674.8	27453.2	22984.5	109477	75157	20491.2	16788.9	65885.2	124271	69631.8	12739	61761.1	18864.5	72224.1	1.68785e+06	6.74774e+06	2.533e+06	917553	3.67316e+06	4.86539e+06	5.57944e+06	7.79455e+06	2.02824e+07	1.14242e+07	12909.3
4.239_398.19208	POS	4.239	398.192	C22 H27 N3 O2 S	(1R,9S)-11-[(Dimethylamino)acetyl]-5-[4-(methylsulfanyl)phenyl]-7,11-diazatricyclo[7.3.1.02,7]trideca-2,4-dien-6-one	6.05752	65.3816	level2	mzCloud										178077	255851	210245	268516	503365	299891	220684	230115	343487	401243	241780	180453	272060	144449	164386	263362	199422	287566	445625	221314	1.44795e+06	1.16081e+06	1.41123e+06	1.29645e+06	1.37404e+06	478733	385911	588081	349549	427980	841852
4.241_232.10829	POS	4.241	232.108	C12 H13 N3 O2	6-anilino-1,3-dimethyl-1,2,3,4-tetrahydropyrimidine-2,4-dione	1.04492	61.7404	level2	mzCloud										714426	747836	798277	910438	741960	674208	728673	867144	697298	544598	594151	870559	659004	740172	696672	624641	697794	851187	875066	833820	1.02089e+06	782793	792812	872867	909727	527925	781879	805577	313139	250097	1.28762e+06
4.245_229.09736	POS	4.245	229.097	C13 H12 N2 O2	N1-[4-(1,3-Oxazol-5-yl)phenyl]cyclopropane-1-carboxamide	0.887473	73.6391	level2	mzCloud										4.29829e+06	3.43897e+06	2.68493e+06	2.33826e+06	3.60644e+06	4.06133e+06	2.91147e+06	2.86146e+06	3.20614e+06	6.17532e+06	5.80151e+06	3.82867e+06	4.40708e+06	4.38612e+06	3.56097e+06	3.41849e+06	2.59254e+06	3.568e+06	3.71583e+06	2.76597e+06	1.60719e+06	953438	1.48373e+06	993420	1.33818e+06	857040	773715	1.27565e+06	694616	785668	973547
4.245_318.19107	POS	4.245	318.191	C14 H23 N O5	NP-022010	112310	64.1971	level2	mzCloud										984957	1.03159e+06	1.86073e+06	1.22662e+06	1.20953e+06	1.07512e+06	869331	1.12154e+06	1.08439e+06	892383	878019	1.37769e+06	1.12125e+06	1.77768e+06	1.90056e+06	986270	1.27241e+06	1.08289e+06	1.24867e+06	735194	9.95913e+06	100958	7.21043e+06	51157.3	200109	52604.8	213233	2.07652e+06	107046	364532	282697
4.249_250.14388	POS	4.249	250.144	C14 H19 N O3	N1-(2,3-dihydro-1,4-benzodioxin-2-ylmethyl)-2,2-dimethylpropanamide	0.429576	68.0848	level2	mzCloud										312479	222558	148949	492308	564282	559604	255888	333132	171760	339657	182516	376731	515447	705277	244306	373274	716339	392341	413126	322599	5.84467e+06	4.20609e+06	3.07566e+06	538085	2.53545e+06	3.35321e+06	1.11801e+06	2.90675e+06	442317	306123	363224
4.252_244.06392	POS	4.252	244.064	C11 H9 N5 S	3-{[(4-amino-1,3,5-triazin-2-yl)thio]methyl}benzonitrile	-5.01928	62.5338	level2	mzCloud										60692.1	51507.5	98505.2	67311.7	57566	133292	112326	129123	86092.3	72687.9	76462.5	73662	67948.1	49718.6	86063	364163	471653	459169	410679	340185	6137.32	5714.76	6935.59	15497.5	9291.1	6146.29	4924	7400.73	9495.52	16636.6	14888.4
4.256_283.14740	POS	4.256	283.147	C14 H19 N O2 S	6-[(4-methylphenyl)sulfonyl]-6-azabicyclo[3.2.1]octane	64223.3	85.0068	level2	mzCloud										915012	1.43744e+06	682367	813752	1.27164e+06	2.76885e+06	1.50756e+06	1.00399e+06	1.27042e+06	1.20037e+06	1.28e+06	1.51817e+06	838956	1.99257e+06	1.1237e+06	628262	1.98582e+06	845704	872046	1.33809e+06	330667	65004	118134	52013	145195	3.59259e+06	3.46903e+06	2.93786e+06	4.18666e+06	1.11106e+06	2.20095e+06
4.259_273.12339	POS	4.259	273.123	C15 H16 N2 O3	2-Morpholino-5-(1H-pyrrol-1-yl)benzoic acid	0.0775914	66.5265	level2	mzCloud										643766	648269	851971	776984	711631	757019	731147	778363	630999	717866	734966	810395	770879	659280	659396	673774	740898	788600	769094	744007	2.02524e+06	1.68174e+06	2.158e+06	2.49256e+06	2.56767e+06	1.7214e+06	1.27492e+06	1.0615e+06	689111	1.05659e+06	350333
4.27_256.09689	POS	4.27	256.097	C15 H13 N O3	NP-019509	0.288097	83.9004	level2	mzCloud										73803.1	127861	17573	10889	11826.6	40564.6	162587	79068.6	132749	228942	30678.5	25238.5	9351.91	26450.7	69103.7	61148.2	9766.18	10722.9	22597.9	41302.7	50655.8	1.06496e+06	696864	120781	402710	150577	85198.3	42104.1	9168.38	87584.6	7598.15
4.282_322.20122	POS	4.282	322.201	C18 H27 N O4	3-hydroxy-N-(1-hydroxy-4-methylpentan-2-yl)-5-oxo-6-phenylhexanamide	-0.195379	62.8614	level2	mzCloud										3.36454e+06	2.8194e+06	3.63522e+06	4.11516e+06	3.61361e+06	2.2122e+06	2.07458e+06	2.6574e+06	2.18024e+06	1.97086e+06	2.44513e+06	3.41045e+06	2.88316e+06	2.8959e+06	2.65208e+06	2.5152e+06	3.00664e+06	2.71768e+06	2.75321e+06	2.34026e+06	141761	135289	116540	172749	128847	59269.4	63781.7	21006.9	41973.3	84186.5	954294
4.288_182.11791	POS	4.288	182.118	C10 H15 N O2	Etilefrine	1.98049	75.1842	level2	mzCloud										652734	536586	677809	888972	1.67266e+06	646164	703087	924330	631781	1.10245e+06	640475	1.21644e+06	1.03403e+06	963324	1.07175e+06	937698	647182	778714	490627	1.24188e+06	3.17641e+06	5.30065e+06	1.2193e+06	674705	4.20067e+06	2.08144e+06	3.36967e+06	5.5267e+06	2.37572e+06	2.48052e+06	215559
4.292_159.04435	POS	4.292	159.044	C10 H8 O3	4-Methylumbelliferone hydrate	1.70152	78.5431	level2	mzCloud										5.8315e+06	6.44081e+06	5.58712e+06	4.89328e+06	4.52447e+06	4.71201e+06	6.99339e+06	9.2372e+06	7.26505e+06	5.67388e+06	4.7117e+06	5.7895e+06	8.45352e+06	5.21249e+06	5.06955e+06	5.46936e+06	3.81784e+06	3.6091e+06	4.58308e+06	4.00256e+06	2.81186e+06	4.88457e+06	5.24863e+06	3.42345e+06	3.09777e+06	2.49046e+06	1.22629e+06	2.75091e+06	2.75215e+06	1.65013e+06	6.77946e+06
4.299_248.12824	POS	4.299	248.128	C14 H17 N O3	3,4-Methylenedioxy-alpha-pyrrolidinopropiophenone	0.466172	74.6665	level2	mzCloud										687488	1.42895e+06	1.1621e+06	2.42864e+06	2.38008e+06	4.54581e+06	1.75261e+06	2.25094e+06	1.68425e+06	1.92703e+06	3.75375e+06	3.33562e+06	1.83835e+06	2.90862e+06	2.91419e+06	1.98865e+06	2.77274e+06	3.88146e+06	1.29962e+06	6.27808e+06	183558	174700	86706.5	54580.4	83750.4	610728	1.52858e+06	1.06732e+06	1.67988e+06	3.00836e+06	2.35513e+06
4.305_351.21652	POS	4.305	351.217	C20 H30 O5	Prostaglandin K2	-0.200357	77.7438	level2	mzCloud										2.617e+06	2.29414e+06	1.60825e+06	514590	3.02903e+06	1.87036e+06	3.81298e+06	4.03168e+06	2.7233e+06	2.90724e+06	3.60363e+06	2.29912e+06	2.84132e+06	3.46084e+06	2.90355e+06	2.06956e+06	1.29e+06	1.92555e+06	2.35223e+06	1.89462e+06	16171.7	12840.1	54637.8	15935.2	44889.5	14352.6	11005.1	18528.4	13329	14014.7	161429
4.312_243.15922	POS	4.312	243.159	C13 H24 O5	3-hydroxy-2-octylpentanedioic acid	-69227.7	77.9828	level2	mzCloud										1.03971e+06	1.17503e+06	855806	1.42642e+06	954393	1.13824e+06	906923	720485	1.06118e+06	919984	903651	717556	848976	553793	909189	2.11592e+06	628674	1.88657e+06	1.43066e+06	1.62782e+06	2.83285e+06	3.06018e+06	1.33549e+06	3.04821e+06	3.31117e+06	1.30175e+06	470227	827900	322270	804935	2.89238e+06
4.318_251.16429	POS	4.318	251.164	C15 H22 O3	8-hydroxy-11-(hydroxymethyl)-1,5,11-trimethyltricyclo[6.2.1.0脗?,芒聛露]undec-2-en-9-one	0.486151	82.2036	level2	mzCloud										2.38455e+06	2.22221e+06	2.57786e+06	3.00355e+06	2.30848e+06	2.3068e+06	2.26105e+06	1.57486e+06	2.43946e+06	2.05256e+06	2.56102e+06	2.56939e+06	2.59057e+06	2.35016e+06	2.16865e+06	1.48222e+06	1.94891e+06	2.50372e+06	2.75401e+06	2.01546e+06	999096	1.07273e+06	1.01961e+06	778423	984035	598155	615773	565108	812417	992202	3.92246e+06
4.321_295.09244	POS	4.321	295.092	C16 H16 O4	NP-013039	80778.8	65.507	level2	mzCloud										7.85799e+06	7.14775e+06	7.17362e+06	8.76854e+06	7.77309e+06	7.08001e+06	6.72218e+06	6.81258e+06	6.77342e+06	6.74778e+06	5.83375e+06	7.06996e+06	6.36802e+06	6.94022e+06	5.39537e+06	6.19419e+06	5.59455e+06	6.04744e+06	6.97636e+06	5.81909e+06	771724	903033	1.16856e+06	1.08319e+06	1.45494e+06	405279	259977	262221	126459	125326	328496
4.322_303.08630	POS	4.322	303.086	C16 H14 O6	8-oxatetracyclo[8.7.0.0脗?,芒聛路.0脗a脗?,脗a芒聛路]heptadeca-2(7),3,5,12,14,16-hexaene-5,6,10,14,15-pentol	-0.0466085	76.2321	level2	mzCloud										3.35661e+06	3.90479e+06	2.92771e+06	4.11562e+06	3.15311e+06	2.6929e+06	2.93588e+06	2.74678e+06	3.11988e+06	2.36729e+06	3.07037e+06	3.18214e+06	3.3394e+06	3.33532e+06	2.48841e+06	2.2277e+06	2.15696e+06	2.67893e+06	2.26507e+06	2.64401e+06	588357	631020	411392	601176	524242	951655	750589	428452	571848	370337	727136
4.338_250.14389	POS	4.338	250.144	C14 H19 N O3	N,N-Dimethylpentylone	0.497327	66.0382	level2	mzCloud										59929	40273.3	45726.9	288231	211249	263687	74001	155565	42473.2	101328	49313.1	260227	278864	287143	166808	188740	287235	180459	245625	209257	1.92381e+06	1.16506e+06	1.09127e+06	164763	1.00267e+06	1.31371e+06	562606	1.70765e+06	415993	390931	138286
4.348_298.14374	POS	4.348	298.144	C18 H19 N O3	(4-nitrophenyl)(2,3,4,5,6-pentamethylphenyl)methanone	-0.111248	84.7198	level2	mzCloud										59919.9	81208.6	88911.1	9684.07	120048	14462.3	43760.1	35105.9	12313	415772	30401.3	105876	15761.4	52791.5	204894	87852	9071.61	11684	11037	105523	226987	3.67509e+06	1.30235e+06	363688	1.46498e+06	199653	101280	100219	8064.62	8741.54	8302.52
4.35_243.13404	POS	4.35	243.134	C11 H18 N2 O4	NP-016455	0.422093	78.7058	level2	mzCloud										4.38383e+06	2.51552e+06	2.49608e+06	969447	943697	1.43019e+06	1.68689e+06	1.02028e+06	1.17928e+06	2.48575e+06	1.01637e+06	759716	890260	1.07226e+06	1.1637e+06	2.46053e+06	471119	1.9503e+06	1.48127e+06	1.27327e+06	976129	3.67323e+06	5.45727e+06	2.15135e+06	6.79748e+06	2.8781e+06	786566	3.27316e+06	469953	701747	782734
4.358_279.12336	NEG	4.358	279.123	C15 H20 O5	(1'S,2'S)-3',11'-dihydroxy-1',2',5'-trimethyl-8'-oxaspiro[oxirane-2,12'-tricyclo[7.2.1.0脗?,芒聛路]dodecan]-5'-en-4'-one	-1.55316	74.663	level2	mzCloud										4.92325e+06	4.88862e+06	4.92125e+06	5.03492e+06	3.68556e+06	3.25527e+06	4.29386e+06	4.04856e+06	4.6258e+06	5.3006e+06	4.09269e+06	5.06283e+06	5.57023e+06	5.02997e+06	4.21797e+06	4.62669e+06	4.38642e+06	4.57665e+06	5.12145e+06	4.26554e+06	1.72872e+06	1.92473e+06	2.18838e+06	1.27557e+06	2.00296e+06	1.04123e+06	659399	938331	526635	867455	846919
4.36_315.08630	POS	4.36	315.086	C17 H14 O6	NP-011892	-0.046328	69.5643	level2	mzCloud										18216.1	17357.6	17020.6	15615.9	12171.8	37096.6	28776.1	20284.1	15747.4	19575.8	16088.2	15591.9	15400.8	15572.2	25486.6	24260.4	122197	17251.4	24710.4	68105.7	19253.3	28047.2	20357	34067.5	16958.3	14085.4	14884.1	12979.9	16132.4	13494.3	534001
4.361_333.14447	POS	4.361	333.144	C20 H22 O3	2-hydroxy-3,6-diphenylcyclohexyl acetate	70868.3	64.1107	level2	mzCloud										211988	276611	369032	308514	297768	438518	189170	347358	265287	276583	232944	255128	269854	222581	311673	265569	299297	387268	299847	208007	430426	231976	204836	289622	333214	126304	157218	950892	550194	1.07378e+06	100373
4.367_347.18524	POS	4.367	347.185	C20 H26 O5	NP-005870	-0.138499	69.2579	level2	mzCloud										572463	1.05716e+06	506467	904272	592256	551466	914504	677274	804602	883432	2.04759e+06	999994	1.54267e+06	2.11001e+06	1.42111e+06	3.44011e+06	403023	4.9757e+06	3.19049e+06	3.76373e+06	16803.8	15296.8	15626.4	18100.3	17482.1	14813.8	9915.88	14337.8	14531.9	13777.9	66790.2
4.369_407.22092	POS	4.369	407.221	C22 H26 N6 O2	(6S)-N6-(4-cyanobenzyl)-N5-cyclohexyl-1,4,6,7-tetrahydro-5H-imidazo[4,5-c]pyridine-5,6-dicarboxamide	4.71709	70.1468	level2	mzCloud										99928.2	129500	87572	83205	82694.3	93776.2	95252.5	87380.1	99981.3	98774.1	86699.5	89053.4	89955.8	90404.3	94153.9	1.63545e+06	79574.8	3.84617e+06	4.05537e+06	2.76649e+06	172300	102430	224986	145248	196244	84845.2	80418.2	115285	84642	89601	71240.4
4.374_333.16686	POS	4.374	333.167	C17 H26 O5	NP-019547	70867.6	65.4201	level2	mzCloud										161775	152759	53107.2	31135.3	91574.2	113313	150455	15322.8	288240	33819.3	117801	25198.5	107526	70188.3	84699.3	48775.3	50868.8	27529.4	90365	46523.2	97538.3	69418.3	92071.4	110314	101412	95228.1	87526.5	78553.8	72575.6	64869.4	1.75442e+06
4.384_399.12755	POS	4.384	399.128	C20 H19 F3 N2 O2	N-[2-Pyrrolidin-1-yl-5-(trifluoromethyl)phenyl]-2,3-dihydro-1-benzofuran-5-carboxamide	58436.8	74.0927	level2	mzCloud										1.55295e+06	1.60093e+06	1.45246e+06	1.88015e+06	1.63299e+06	821540	1.34644e+06	808029	926095	1.43495e+06	1.75038e+06	1.55317e+06	1.46409e+06	1.86627e+06	2.21206e+06	1.17457e+06	1.73484e+06	1.4455e+06	1.37397e+06	1.08144e+06	2.26167e+06	2.22229e+06	1.41778e+06	1.14555e+06	1.2889e+06	2.29369e+06	2.76731e+06	1.9039e+06	5.0993e+06	4.81327e+06	1.33073e+06
4.417_407.18889	POS	4.417	407.189	C18 H30 O10	NP-020916	-5.63022	68.4562	level2	mzCloud										5810.66	6418.52	18430.5	5037.91	7443.24	15427.4	8713.7	13244.5	13723.7	5422.23	6751.73	5269.2	6530.67	6588.09	3062.24	2920.58	7521.83	13091.5	8194.62	3024.46	10000.6	6647.87	13421.6	7021.27	11107.6	6977.53	5427.87	8606.1	3496.27	5350.21	6373.37
4.422_161.10759	POS	4.422	161.108	C10 H12 N2	1-propyl-1H-benzo[d]imidazole hydrobromide	1.63752	81.3615	level2	mzCloud										229198	219269	202239	212494	252245	878331	378008	504936	767792	455622	225435	342872	200945	252407	806344	278625	399130	142072	400090	562162	55489.5	49420.7	49960.3	146225	41558.9	1.28695e+06	1.43085e+06	1.15584e+06	1.83477e+06	401124	413522
4.425_255.09511	POS	4.425	255.095	C15 H14 N2 S	N2-(2,4-dimethylphenyl)-1,3-benzothiazol-2-amine	0.272505	66.163	level2	mzCloud										1.22783e+06	1.59577e+06	755478	1.86915e+06	1.56678e+06	747595	514151	1.29794e+06	669349	1.17032e+06	1.19658e+06	1.58964e+06	734613	1.69286e+06	1.85444e+06	1.56919e+06	1.72327e+06	980959	1.03099e+06	927232	185830	50967.3	60031	44435.1	108223	135030	95623.7	49427.6	118863	92883.5	31413.4
4.429_194.07278	POS	4.429	194.073	C9 H11 N3 S	N-isopropyl[1,3]thiazolo[5,4-b]pyridin-2-amine	-9.63517	77.6486	level2	mzCloud										581790	957858	333232	289405	226755	69027.4	421860	296878	446188	542939	386863	377415	525018	360876	488493	620201	200669	567862	62894.1	449548	1.21148e+06	742865	1.68199e+06	689469	1.38766e+06	561186	552897	741396	139591	366569	135497
4.432_324.20708	POS	4.432	324.207	C20 H25 N3 O	2-Benzotriazol-2-yl-4,6-di-tert-butylphenol	0.118191	69.1869	level2	mzCloud										8677.55	8787.38	8645.73	9883.03	9659.83	9654.83	8346.5	8237.98	9607.57	8742.4	8742.95	9205.75	9924.97	8819.36	10527.2	8625.4	8032.98	9182.7	10128.6	9404.86	29340.7	22012.8	35242.2	22679.1	32532.8	19021.2	16522.6	25088	11613.8	16459.9	9959.6
4.434_247.10778	POS	4.434	247.108	C13 H14 N2 O3	2-(3,5-dimethyl-1H-pyrazol-4-yl)-5-methoxybenzoic acid	0.26398	70.2558	level2	mzCloud										65302.7	76116.3	73734	25581.4	78100.6	269460	20600.9	65446.6	119897	278321	39747.9	122101	44026.7	109281	111135	33106.9	178348	31101.4	30701.7	10396.6	97832	411320	212044	629248	909931	544151	507425	409673	357339	427647	108341
4.45_243.07646	POS	4.45	243.076	C11 H8 N2 O2 S	6-(2-furyl)-2-hydroxy-4-(methylthio)nicotinonitrile	43263.8	78.4523	level2	mzCloud										953112	808171	1.10042e+06	1.02417e+06	1.04842e+06	1.00683e+06	1.40629e+06	1.47571e+06	1.06102e+06	1.02277e+06	1.87876e+06	1.12045e+06	2.02101e+06	1.51666e+06	1.3952e+06	1.531e+06	1.02833e+06	678275	974496	1.7061e+06	45691.1	33911.3	55580.7	62317.2	48381.8	95369.8	75747.5	47875.4	38050.7	25184.7	65053.1
4.452_464.26445	POS	4.452	464.264	C26 H33 N5 O3	N-{(4R,7S,8aS)-4-[3-(Benzylamino)-3-oxopropyl]-1-oxooctahydropyrrolo[1,2-a]pyrazin-7-yl}-4-(dimethylamino)benzamide	-2.5172	76.5053	level2	mzCloud										854135	722791	1.26196e+06	1.1694e+06	1.12011e+06	979169	937719	1.29085e+06	1.02046e+06	784982	796092	1.20261e+06	1.08824e+06	1.057e+06	913163	673075	1.02607e+06	760555	904345	577202	39082.3	21429.3	51299.8	32906.1	41992.4	27906.6	22402.7	30176.7	17483.9	22748.9	316361
4.46_259.09707	NEG	4.46	259.097	C15 H16 O4	NP-016721	-1.95209	77.3294	level2	mzCloud										224940	341466	338162	345578	252672	40327.4	50617.7	23865.2	31839.3	179253	359134	390982	424214	343962	320043	224393	15129.7	255641	246190	215075	505527	548589	659716	494274	510520	360722	292468	433499	258027	315515	305963
4.468_192.10216	POS	4.468	192.102	C11 H13 N O2	N1-(2-oxopropyl)-2-phenylacetamide	1.32264	74.0138	level2	mzCloud										220777	170372	330946	371272	199562	154348	188014	92770.4	520599	216727	101512	203675	221514	219755	251517	119729	241506	394167	122933	216297	148551	183565	109890	44814.7	153083	68898.8	94438.1	62699.9	338050	207822	55522.6
4.471_234.09868	POS	4.471	234.099	C10 H11 N5 O2	2-[(2-Methylimidazo[1,2-a]pyridin-3-yl)carbonyl]hydrazine-1-carboxamide	0.551186	67.748	level2	mzCloud										48605.1	46333	129127	47728.8	56253.4	92248.1	70193.9	103734	55548.1	52042.6	58003.7	56410.2	108170	36752.2	138267	35400.3	140254	28780.9	43994.6	63035.7	13823.2	14516.3	7291.09	8989.29	5704.84	7138.58	13667.3	14579.4	14144.3	6225.18	42673.4
4.479_261.12394	NEG	4.479	261.124	C14 H18 N2 O3	5-(tert-butyl)-2-methyl-N-(5-methyl-3-isoxazolyl)-3-furamide	-2.01427	71.8026	level2	mzCloud										2.94872e+06	2.45264e+06	1.56606e+06	1.92939e+06	1.46191e+06	4.59389e+06	2.01482e+06	1.71074e+06	2.73074e+06	2.87245e+06	1.57156e+06	1.98586e+06	1.25874e+06	1.73949e+06	2.14797e+06	2.96255e+06	1.29071e+06	2.2839e+06	3.78231e+06	2.30826e+06	2.59332e+06	3.24214e+06	9.20324e+06	7.01234e+06	7.89082e+06	1.16032e+07	4.44064e+06	2.12697e+07	1.73331e+06	2.40763e+06	1.86017e+06
4.502_265.14346	POS	4.502	265.143	C15 H22 O5	NP-005196	-63833.9	90.4778	level2	mzCloud										138284	108104	97785.8	188034	111661	197627	150827	105262	113616	132004	147327	119230	103334	260375	113772	136013	81631.7	136236	151377	136696	171527	203123	316790	2.53112e+06	134296	318476	84914	1.15205e+06	104529	55499.6	95411.3
4.502_305.13587	POS	4.502	305.136	C15 H22 O5	(1S,5R,9R,13R)-1,5,9-trimethyl-11,14,15,16-tetraoxatetracyclo[10.3.1.0芒聛麓,脗a脗l.0芒聛赂,脗a脗l]hexadecan-10-one	77909.3	86.1485	level2	mzCloud										1996.52	2053.54	2160.59	3317.32	1401.41	1924.6	1756.72	2511.25	2934.15	1338.17	1283.05	1632.92	1396.06	2407.87	2213.5	2802.75	1309.87	1142.12	2477.36	1757.55	3854.84	3492.03	7880.43	62586	2647.79	9154.33	755.83	31603.4	3584.06	930.775	1710.31
4.503_282.16998	POS	4.503	282.17	C15 H20 O4	5,10,15-trimethyl-4,9,13-trioxatetracyclo[10.3.0.0脗l,芒聛碌.0芒聛赂,脗a芒聛掳]pentadec-1(15)-en-14-one	64461.3	83.0711	level2	mzCloud										33861.6	27774.2	31899	44090.5	47915.7	42837.8	35851.8	33600.4	113591	46983.4	50311.7	51778.6	27159	115994	31178.6	53120.1	40965	27562.1	105653	23467.4	37208.7	30988.4	60560.6	380037	33021.5	44832.6	29585.2	156811	22720.5	21575.6	28698
4.51_225.11237	POS	4.51	225.112	C12 H16 O4	Senkyunolide H	1.04551	84.7688	level2	mzCloud										3.70195e+06	5.51868e+06	1.08015e+06	1.09499e+06	3.88851e+06	1.14364e+06	1.56141e+06	5.02276e+06	3.4755e+06	3.27916e+06	8.56938e+06	2.79619e+06	3.08107e+06	904317	148652	880685	4.04682e+06	1.03407e+06	6.94284e+06	164986	1.50749e+06	122416	3.87373e+06	191759	3.40502e+06	2.12125e+06	1.13384e+06	5.85723e+06	595641	2.15041e+06	806494
4.521_294.21756	POS	4.521	294.218	C16 H29 N3 O3	2-Methoxy-N-{[(2R,4S,5S)-5-(4-morpholinylmethyl)-1-azabicyclo[2.2.2]oct-2-yl]methyl}acetamide	-57870.8	69.4513	level2	mzCloud										12983.4	18465.1	14558.9	12921.3	54334.8	104295	15465.5	18675.2	13124.2	190410	38239.5	56665.8	48487.8	133632	56471.2	12593.8	100605	18335.5	53197.2	14852.8	234048	322039	401218	594247	217369	896768	788840	84008.7	402567	545138	1.72047e+06
4.536_199.13324	POS	4.536	199.133	C11 H20 O4	(3S,4R)-3-(1-hydroxyhexyl)-4-(hydroxymethyl)oxolan-2-one	-83328	74.8179	level2	mzCloud										2.45195e+06	1.9832e+06	2.44742e+06	2.49526e+06	1.81833e+06	2.0438e+06	2.26033e+06	2.07628e+06	2.31765e+06	2.02446e+06	1.21681e+06	2.62652e+06	2.46182e+06	2.41446e+06	1.50204e+06	903156	501976	1.91254e+06	2.29726e+06	1.2228e+06	2.5614e+06	3.52427e+06	5.58689e+06	2.71714e+06	2.17777e+06	1.72753e+06	1.60868e+06	2.05646e+06	1.09383e+06	1.42955e+06	2.88528e+06
4.555_181.07602	POS	4.555	181.076	C12 H10 N2 O	4-Nitrosodiphenylamine	0.99112	79.9185	level2	mzCloud										2.72882e+06	2.48612e+06	2.77453e+06	3.25791e+06	2.64619e+06	3.28657e+06	3.68948e+06	3.5147e+06	3.41482e+06	2.26633e+06	2.71971e+06	3.00168e+06	3.49683e+06	3.18922e+06	2.35337e+06	3.11266e+06	2.49967e+06	3.42193e+06	2.41623e+06	3.69238e+06	45038.2	53324.1	81413.7	33132.4	57765.1	90931.7	111421	70793.6	36021.7	25616.3	94588.6
4.563_407.26526	POS	4.563	407.265	C21 H34 N4 O4	FLK	-0.0572566	60.3757	level2	mzCloud										45836	42045	29201.9	28972.2	23534.3	32540.1	32724.6	30831.6	39000.5	24724.8	26097.8	29613.9	28713.9	49978.1	21981.3	26321	36575.3	29190.7	62402.6	28825.4	278933	63516.1	578309	326469	244820	242404	122207	281421	32144.2	16203.9	124363
4.567_309.13740	NEG	4.567	309.137	C17 H18 N4 O2	N-[(1R,9S)-6-Oxo-7,11-diazatricyclo[7.3.1.02,7]trideca-2,4-dien-5-yl]isonicotinamide	5.48631	67.346	level2	mzCloud										46057.9	43963.3	38934.6	66875.5	4615.66	315340	251810	158152	215323	120265	23738.1	27321.3	10439.9	14500.3	5073.45	945045	43704	645951	342330	115982	571810	450144	427248	730577	508996	635896	278899	158297	133259	225407	3.09292e+06
4.573_202.08657	POS	4.573	202.087	C12 H11 N O2	4-(allyloxy)-1,2-dihydroquinolin-2-one	1.56876	73.9021	level2	mzCloud										380055	1.27502e+06	878705	32234.8	94671.3	468491	157652	422141	774675	1.99443e+06	76834.5	169584	57458.7	172361	586921	154620	152392	129126	44150.3	26202.5	115293	1.30751e+06	1.41417e+06	1.62023e+06	4.06571e+06	2.64746e+06	1.3667e+06	820952	1.27425e+06	1.20439e+06	178791
4.592_299.08481	POS	4.592	299.085	C16 H14 N2 O2 S	ethyl 3-cyano-6-methyl-2-(phenylthio)isonicotinate	-0.212701	73.1573	level2	mzCloud										1.41767e+07	1.7529e+07	1.41781e+07	1.54889e+07	2.06776e+07	2.02637e+07	1.74294e+07	1.73442e+07	1.59407e+07	1.99446e+07	1.37014e+07	2.90403e+07	1.27789e+07	2.31269e+07	1.49177e+07	1.51364e+07	9.7915e+06	1.37126e+07	9.87836e+06	1.4503e+07	4.3574e+07	2.76218e+07	1.74571e+07	1.12654e+07	3.41827e+07	3.441e+07	3.0947e+07	2.31976e+07	2.41547e+07	1.80284e+07	5.70519e+06
4.594_275.13895	POS	4.594	275.139	C15 H18 N2 O3	AB-CHMINACA metabolite M5A	-0.237534	74.6227	level2	mzCloud										182302	155257	274581	75534.5	204897	608524	237181	182028	216713	1.40489e+06	217737	175854	180407	535267	252897	164463	194476	265480	486963	105624	576819	2.88963e+06	858092	1.15193e+06	1.36199e+06	1.4838e+06	806503	1.09752e+06	803689	1.09128e+06	134218
4.598_167.10694	POS	4.598	167.107	C10 H14 O2	6-Pentyl-2H-pyran-2-one	1.73197	83.3486	level2	mzCloud										8.5525e+06	1.12629e+07	1.14007e+07	1.37014e+07	1.2022e+07	1.01304e+07	1.04507e+07	1.07519e+07	9.77881e+06	8.55599e+06	7.70163e+06	8.64374e+06	9.90033e+06	7.61659e+06	7.84626e+06	1.23309e+07	1.20131e+07	1.02385e+07	1.03446e+07	1.46831e+07	5.55388e+06	4.13858e+06	7.91656e+06	4.80737e+06	5.06451e+06	5.18779e+06	3.34771e+06	4.84333e+06	4.47657e+06	4.30081e+06	1.18911e+07
4.609_287.11387	POS	4.609	287.114	C14 H14 N4 O3	3-(3-methoxypropyl)-4,10-dihydro-3H-[1,2,4]triazino[6,1-b]quinazoline-4,10-dione	0.00467002	66.8556	level2	mzCloud										507050	413133	535656	430723	555348	466516	502804	332314	369157	795113	508582	450244	459066	625542	518823	558731	275331	412049	323736	745396	4.80347e+06	1.46724e+06	1.58794e+06	2.23107e+06	2.33934e+06	1.2294e+06	1.64901e+06	719868	1.13253e+06	2.53725e+06	2.39864e+06
4.614_455.14845	POS	4.614	455.148	C28 H22 O6	5-{(2R,3S)-6-Hydroxy-2-(4-hydroxyphenyl)-4-[(E)-2-(4-hydroxyphenyl)vinyl]-2,3-dihydro-1-benzofuran-3-yl}-1,3-benzenediol	-1.02036	71.5518	level2	mzCloud										350694	368922	541062	606186	354448	563185	328524	836151	464549	409299	409139	616875	682342	407412	521579	1.44746e+06	2.66505e+06	1.96252e+06	2.0325e+06	983540	12672.6	12452.7	32805.8	13662	14704.1	13976.4	11261	17778.7	12910.3	14327.7	44558.2
4.627_223.09735	NEG	4.627	223.097	C12 H16 O4	NP-006122	-1.05237	78.5509	level2	mzCloud										22796	48305.2	45781.5	14529.5	69997.4	706139	91253.7	171021	478351	48744	31952.9	117344	53712.7	21631.2	98285.2	59773.7	1.47151e+06	42697.8	294417	224377	124991	17817.4	160470	137861	79790.9	14517.6	32161.9	84506.9	76060.9	17713.3	501751
4.628_331.19034	POS	4.628	331.19	C20 H26 O4	NP-020713	-0.150548	67.7791	level2	mzCloud										2.44165e+07	2.15242e+07	2.8317e+07	3.38375e+07	2.95277e+07	2.32561e+07	2.16241e+07	2.23657e+07	2.21806e+07	2.03882e+07	1.53449e+07	2.48502e+07	2.1277e+07	2.14408e+07	2.08086e+07	1.06351e+07	2.13677e+07	1.03168e+07	1.60435e+07	1.13924e+07	13165.9	10895.3	29872.9	11435	14179.3	13578.5	10095.2	15221.5	12186.4	11736.1	20456.7
4.636_269.13845	POS	4.636	269.138	C15 H13 N3 O	3-(3,4-dimethylphenyl)-3,4-dihydro-1,2,3-benzotriazin-4-one	67801.3	80.6652	level2	mzCloud										5.91195e+06	3.789e+06	1.19919e+07	1.07744e+07	8.60642e+06	6.52229e+06	4.59471e+06	4.89414e+06	4.32081e+06	6.24333e+06	3.02029e+06	1.11276e+07	3.08878e+06	3.71224e+06	3.71865e+06	5.31806e+06	8.79856e+06	2.09524e+06	7.50212e+06	3.75835e+06	2.15663e+06	1.33635e+06	1.78402e+06	1.42838e+06	1.6009e+06	1.37047e+06	679765	1.02216e+06	1.19333e+06	729442	1.70844e+06
4.637_305.10611	NEG	4.637	305.106	C15 H15 Cl2 N3 O2 S	N1-(3,5-dichlorophenyl)-2-[(4-hydroxy-6-propylpyrimidin-2-yl)thio]acetamide	-174955	63.8156	level2	mzCloud										13803.2	40001.3	86153.3	40416.3	21456.1	69725.7	82162.7	70569.2	53768.5	58824.8	13134.1	35067.6	60455.5	38591.8	7889.15	96036.7	28034.8	68848.2	19604	28789.4	118444	159841	135518	132270	119125	113775	48681.6	46839.3	26295.8	27735.3	486257
4.642_207.13827	POS	4.642	207.138	C13 H20 O3	NP-007909	-80352.2	88.787	level2	mzCloud										3.16606e+06	2.78067e+06	2.69497e+06	2.88074e+06	2.57261e+06	1.66368e+06	2.46624e+06	2.47436e+06	1.31931e+06	2.83507e+06	1.66567e+06	2.52579e+06	3.26198e+06	3.07967e+06	1.5931e+06	2.18617e+06	3.10141e+06	2.53088e+06	1.51278e+06	2.53697e+06	1.11262e+06	1.04004e+06	2.84036e+06	1.09174e+06	1.4668e+06	985605	815603	990767	670480	702923	1.88435e+06
4.642_274.10743	POS	4.642	274.107	C15 H15 N O4	N-(2,3-dihydro-1,4-benzodioxin-6-yl)-2,5-dimethyl-3-furamide	0.149057	70.5651	level2	mzCloud										60480.3	83981.2	131309	190225	302818	1.19436e+06	538688	688306	295696	455410	455668	580098	630942	156140	178064	307650	570017	348888	1.28466e+06	1.38771e+06	1.75399e+06	2.12213e+06	1.02177e+06	1.75093e+06	625382	195011	111429	1.76584e+06	177132	4.28846e+06	5.33064e+06
4.653_362.11461	POS	4.653	362.115	C20 H15 N3 O4	N1-(1-ethyl-2-oxo-1,2-dihydrobenzo[cd]indol-6-yl)-3-nitrobenzamide	2.99173	64.5938	level2	mzCloud										7929.58	8059.2	8846.39	8190.06	8910.3	7759.03	8213.39	7732.03	8046.24	8364.09	7146.76	7706.5	7883.86	7666.42	7813.7	7035.69	8640.77	7635.61	7601.47	7916.38	7394.48	5530.82	10807.1	7000.14	6953.92	6189.14	5619.18	6300.89	6594.9	6576.29	6890.41
4.658_241.08610	POS	4.658	241.086	C15 H14 O4	NP-021868	-69783.6	73.5365	level2	mzCloud										248490	217408	536368	23609.1	263829	545887	435495	354579	774976	261270	60346	180089	212050	245665	123748	410650	315229	445372	1.20775e+06	454049	259469	413247	1.05042e+06	1.18138e+06	542680	1.5985e+06	1.61055e+06	1.02259e+06	572431	273192	2.87376e+06
4.659_185.03554	NEG	4.659	185.036	C10 H6 N2 O2	6-(2-furyl)-2-oxo-1,2-dihydropyridine-3-carbonitrile	-0.60878	68.9434	level2	mzCloud										3500.78	3168.23	5090.79	3968.57	3572.17	4627.03	4167.21	4114.56	4929.18	3640.45	4977.95	4378.72	5442.14	4139.97	5192.53	57819.1	53804.5	26505	69524.8	51062.5	2786.44	2270.76	2587.19	2296.77	2390.85	2342.87	2776.4	2270.59	3525.27	3811.58	128779
4.668_321.14450	POS	4.668	321.144	C19 H22 O3	7-{[(2E)-3,7-dimethylocta-2,6-dien-1-yl]oxy}-2H-chromen-2-one	73720.7	66.0768	level2	mzCloud										1.19305e+06	1.27522e+06	1.76535e+06	1.51423e+06	1.6377e+06	1.15189e+06	1.6222e+06	1.70562e+06	1.20653e+06	1.24516e+06	1.36728e+06	1.28638e+06	1.50245e+06	1.53401e+06	1.78894e+06	1.05281e+06	3.01055e+06	1.39679e+06	1.06164e+06	1.26796e+06	1.10672e+06	1.05489e+06	1.17545e+06	1.30043e+06	1.65789e+06	844736	935353	541408	502136	463011	2.27008e+06
4.682_255.12341	NEG	4.682	255.123	C13 H20 O5	NP-020515	-1.49541	77.5112	level2	mzCloud										736487	542081	638349	510296	697136	602368	450562	1.45511e+06	756233	728540	473283	741202	736737	873513	485931	1.04236e+06	794997	519064	680318	95715.6	123923	138589	137204	129431	212994	83613.3	24164.7	125115	75051	197400	699193
4.684_381.19074	POS	4.684	381.191	C20 H30 O8	NP-015947	-45230.7	79.1874	level2	mzCloud										8.79621e+06	8.36283e+06	9.77734e+06	1.20886e+07	2.27487e+06	7.81602e+06	7.24686e+06	7.04394e+06	6.78492e+06	6.81632e+06	6.34964e+06	8.80766e+06	8.06832e+06	8.98031e+06	7.08152e+06	5.98294e+06	6.57638e+06	6.87034e+06	7.81083e+06	6.87987e+06	1.2808e+07	8.96087e+06	9.67394e+06	1.14461e+07	1.01045e+07	6.92825e+06	4.83373e+06	4.1749e+06	4.48308e+06	4.36553e+06	1.1196e+07
4.686_147.11706	POS	4.686	147.117	C11 H16 O	Jasmone	1.55668	73.9504	level2	mzCloud										9.64653e+06	9.55597e+06	1.16011e+07	1.3173e+07	1.46331e+07	1.31287e+07	9.70906e+06	1.22173e+07	1.04292e+07	1.06562e+07	7.7806e+06	1.05325e+07	1.01741e+07	8.67074e+06	7.14343e+06	8.84686e+06	1.08735e+07	1.0154e+07	1.02045e+07	1.21569e+07	1.4811e+07	7.86793e+06	2.1788e+06	1.0227e+07	8.12219e+06	6.28615e+06	2.30611e+06	1.31804e+06	4.84835e+06	4.44272e+06	1.3922e+07
4.714_223.16948	POS	4.714	223.169	C14 H24 O3	NP-012972	-74989.2	87.9404	level2	mzCloud										953994	1.24978e+06	1.37124e+06	1.65935e+06	1.05272e+06	1.00699e+06	1.03197e+06	1.44759e+06	1.08015e+06	1.34102e+06	1.03418e+06	1.63291e+06	1.46388e+06	1.24697e+06	1.33315e+06	940044	910695	966580	1.53331e+06	648304	1.2251e+06	1.36836e+06	561106	1.35576e+06	1.09122e+06	308740	217743	301174	146665	314047	1.14006e+06
4.718_314.19617	POS	4.718	314.196	C16 H29 N O6	NP-022507	-54379.9	74.2916	level2	mzCloud										1.41423e+06	2.00089e+06	3.20142e+06	2.17961e+06	2.13481e+06	1.95453e+06	1.44245e+06	2.16572e+06	1.82279e+06	1.16043e+06	947654	1.20067e+06	1.58406e+06	1.30907e+06	854397	1.07057e+06	1.37629e+06	1.28023e+06	1.70325e+06	1.72895e+06	267131	173461	204573	281598	211862	131596	92156.6	102973	138483	159651	377076
4.722_232.15453	POS	4.722	232.155	C11 H21 N O4	NP-020155	0.826733	64.3283	level2	mzCloud										392496	430363	346480	340894	322191	331226	380289	372472	322930	387545	423017	430786	351369	337561	321753	250695	345686	441226	394990	369598	251494	339126	325479	355166	321523	332315	272332	295956	258958	286195	386914
4.778_207.10184	POS	4.778	207.102	C12 H14 O3	NP-013210	1.33738	86.8495	level2	mzCloud										3.48935e+07	3.82143e+07	4.82265e+07	5.64563e+07	4.32166e+07	3.08163e+07	3.45093e+07	4.26147e+07	3.52966e+07	3.15588e+07	3.39787e+07	4.48707e+07	3.87e+07	3.6616e+07	3.52387e+07	3.06025e+07	3.37396e+07	3.54253e+07	3.98604e+07	3.7481e+07	1.23582e+07	1.29447e+07	6.88674e+06	1.41924e+07	1.03068e+07	6.33461e+06	4.30597e+06	2.95901e+06	4.55675e+06	3.94533e+06	4.84607e+07
4.778_257.13843	POS	4.778	257.138	C13 H20 O5	NP-021074	0.321902	83.6212	level2	mzCloud										3.92176e+07	3.88594e+07	5.28387e+07	6.2521e+07	4.81304e+07	3.43709e+07	3.9995e+07	4.6749e+07	3.92587e+07	3.40912e+07	3.51147e+07	4.84017e+07	4.29873e+07	4.24969e+07	3.78488e+07	3.35288e+07	3.55439e+07	4.10339e+07	4.51747e+07	4.08977e+07	1.27539e+07	1.22853e+07	5.50004e+06	1.41816e+07	1.04833e+07	6.43513e+06	3.75867e+06	2.61283e+06	4.00995e+06	4.37565e+06	5.27308e+07
4.779_539.15766	POS	4.779	539.158	C26 H23 N3 O7 S	1,4:3,6-Dianhydro-2-{[(2-cyanophenyl)sulfonyl]amino}-2-deoxy-5-O-[(4-phenoxyphenyl)carbamoyl]-D-glucitol	32669.1	62.0936	level2	mzCloud										1.27776e+06	1.2681e+06	2.13211e+06	2.84097e+06	2.00717e+06	1.09417e+06	1.35661e+06	2.05805e+06	1.45854e+06	1.10421e+06	1.31346e+06	2.10167e+06	1.72434e+06	1.67587e+06	1.40662e+06	1.28021e+06	1.31582e+06	1.2735e+06	1.71852e+06	1.49624e+06	117793	151722	22246.4	189479	131555	57513.2	14527.1	13020.7	14487.5	14128.4	2.96551e+06
4.828_311.18283	POS	4.828	311.183	C17 H26 O5	NP-020273	-8.01106	88.2613	level2	mzCloud										111491	42754.9	94005.2	143907	58751.7	72930.4	92099.1	103855	49019	176554	95458.9	78526.6	76473.1	59034.7	188463	30304.3	72884.8	48030.3	146870	52717.7	1.32956e+06	1.24432e+06	923739	913617	2.30267e+06	1.36822e+06	268648	143036	347832	186705	726822
4.833_189.05251	POS	4.833	189.053	C9 H10 O3	1-(2-furyl)pentane-1,4-dione	132373	72.9577	level2	mzCloud										211968	172409	131289	51699.3	639255	589440	464798	321378	485944	368977	423799	614563	363567	476616	174315	117329	387952	80887.6	220660	123643	312235	209232	1.04642e+06	208374	227160	651143	992274	1.61596e+06	1.26264e+06	1.45426e+06	198977
4.834_223.09673	POS	4.834	223.097	C12 H16 O5	5-hydroxy-4-[3-(2-hydroxypropan-2-yl)oxiran-2-yl]-1-methyl-7-oxabicyclo[4.1.0]hept-3-en-2-one	0.908773	65.9012	level2	mzCloud										2.43822e+06	4.87323e+06	2.26054e+06	2.69435e+06	1.14608e+07	1.62893e+06	2.95099e+06	2.26749e+06	2.51335e+06	1.64417e+06	2.06578e+06	2.8732e+06	2.1979e+06	2.94492e+06	2.22388e+06	2.18848e+06	1.58826e+06	1.79308e+06	3.00424e+06	1.93343e+06	2.49922e+06	3.29921e+06	1.47828e+06	1.39154e+06	930170	1.76859e+06	1.44828e+06	945002	1.52395e+06	1.96657e+06	1.00703e+06
4.861_261.12344	POS	4.861	261.123	C14 H16 N2 O3	1-(2-Morpholinophenyl)dihydro-1H-pyrrole-2,5-dione	0.274074	61.8238	level2	mzCloud										1.93215e+06	881855	532181	1.21103e+06	434016	3.0115e+06	1.45921e+06	722797	1.7671e+06	1.13428e+06	580845	496464	665712	526769	1.27215e+06	4.70338e+06	1.13977e+06	2.39776e+06	2.31666e+06	2.22438e+06	171889	397501	195330	179145	404652	454602	331008	902253	282667	318945	936224
4.866_438.23927	NEG	4.866	438.239	C23 H32 F3 N3 O2	N-{[(2R,4S,5R)-5-{[(2R)-2-(Methoxymethyl)-1-pyrrolidinyl]methyl}-1-azabicyclo[2.2.2]oct-2-yl]methyl}-4-(trifluoromethyl)benzamide	4.28247	81.4065	level2	mzCloud										461.278	472.578	568.014	480.104	413.708	917.647	656.77	413.482	456.899	445.85	687.009	426.485	469.263	411.657	767.752	768.778	412.164	460.571	487.95	439.5	8082.34	4218.19	4968.75	10245.8	4842.96	17330.2	7319.98	6747.45	5006.95	5137.89	953.245
4.867_251.12544	POS	4.867	251.125	C12 H20 O4	NP-000124	96354.8	87.4816	level2	mzCloud										3.89989e+06	4.73596e+06	4.49417e+06	6.32095e+06	4.18297e+06	4.09631e+06	5.23876e+06	5.25116e+06	4.88723e+06	4.22042e+06	4.48389e+06	4.96671e+06	4.86205e+06	3.96748e+06	4.00503e+06	6.34411e+06	7.30721e+06	6.61475e+06	7.03342e+06	5.70603e+06	2.76493e+06	2.66375e+06	2.95143e+06	3.27684e+06	2.93513e+06	2.25012e+06	1.64007e+06	1.85951e+06	1.18209e+06	1.76516e+06	6.67921e+06
4.872_197.08121	POS	4.872	197.081	C10 H12 O4	NP-019992	1.76299	84.2559	level2	mzCloud										111952	154612	115051	137211	146927	126697	132991	126648	314053	138366	119457	232117	171255	199396	263570	178246	69110.7	69739.9	92866.2	426221	74592.2	68826.8	95691.8	38426.1	669198	38538	28168.3	58839.4	80332.9	127887	213476
4.877_353.11653	POS	4.877	353.117	C24 H18 O4	4-(2,3-dihydro-1,4-benzodioxin-6-yl)-1,2-diphenylbut-2-ene-1,4-dione	-48663.2	76.1825	level2	mzCloud										7129.8	7089.13	6116.63	6289.61	5028.75	7063.85	7041.19	6683.29	8362	7729.95	5517.25	7555.67	6763.63	6623.44	4837.32	6563.4	10008.6	8062.17	11678.2	6977.48	4761.24	4136.13	3775.44	4360.23	5526.37	4331.37	3071.51	3570.24	2831.42	3273.07	9205.32
4.879_155.07051	POS	4.879	155.071	C8 H12 O4	NP-020082	-104666	86.6821	level2	mzCloud										2.66134e+06	3.23452e+06	2.95619e+06	4.3875e+06	2.76756e+06	2.91725e+06	3.3052e+06	3.32489e+06	2.79285e+06	2.80969e+06	2.77116e+06	3.20837e+06	3.21862e+06	2.51941e+06	2.79247e+06	4.64242e+06	4.58048e+06	4.0995e+06	4.84796e+06	4.30132e+06	2.0504e+06	2.16524e+06	1.80869e+06	2.23441e+06	2.05096e+06	1.37245e+06	1.71097e+06	1.18211e+06	1.98518e+06	2.5257e+06	5.86814e+06
4.889_295.15399	POS	4.889	295.154	C16 H24 O6	(3E,5S,8R,11E,13S,16R)-5,13-dihydroxy-8,16-dimethyl-1,9-dioxacyclohexadeca-3,11-diene-2,10-dione	-57697.1	62.0877	level2	mzCloud										2.73141e+06	2.75812e+06	2.67049e+06	3.64598e+06	2.56195e+06	2.26845e+06	1.86255e+06	2.8609e+06	2.15279e+06	2.21775e+06	2.05795e+06	2.84432e+06	2.69571e+06	2.26302e+06	2.13392e+06	1.89676e+06	1.9721e+06	2.12337e+06	1.97235e+06	2.45808e+06	2.07374e+06	1.52851e+06	2.27301e+06	1.41025e+06	1.14434e+06	201219	86659	143620	134932	79261.2	434489
4.949_227.09172	POS	4.949	227.092	C11 H14 O5	NP-007866	1.41775	71.1539	level2	mzCloud										405197	657568	470989	488921	304671	337959	555150	629190	469182	627136	344329	389110	709491	337260	313165	358314	472749	337473	402450	395594	48146.9	67675.8	69285	130771	52112.8	136669	77810.2	206180	46117.5	62819.5	215312
4.953_195.10193	POS	4.953	195.102	C11 H16 O4	NP-007994	-84911.8	78.5194	level2	mzCloud										1.94581e+06	2.03713e+06	1.76356e+06	2.09828e+06	2.0838e+06	1.51011e+06	2.77396e+06	1.7266e+06	1.94556e+06	1.58754e+06	2.2733e+06	1.86463e+06	1.84695e+06	1.67375e+06	1.76429e+06	1.78816e+06	1.67309e+06	1.4306e+06	2.0495e+06	1.91057e+06	975882	1.09179e+06	1.14169e+06	985328	621808	956897	741969	837433	944277	2.88517e+06	1.33e+06
4.965_257.08090	POS	4.965	257.081	C15 H12 O4	(3R)-8-hydroxy-3-(4-hydroxyphenyl)-3,4-dihydro-1H-2-benzopyran-1-one	0.23414	80.4536	level2	mzCloud										1.20133e+06	1.19733e+06	1.48738e+06	2.27354e+06	1.26847e+06	865871	716534	869260	1.24558e+06	775502	1.17632e+06	856258	1.25073e+06	1.0338e+06	951295	1.06068e+06	1.00032e+06	1.59856e+06	1.21821e+06	1.15536e+06	479926	212233	74211.5	178032	188234	73958.3	118173	50740.7	72214.5	33735.7	451459
4.966_285.07647	NEG	4.966	285.076	C16 H14 O5	NP-000924	-1.33245	64.8947	level2	mzCloud										237.969	246.737	236.002	251.464	217.478	952.792	225.766	198.158	233.858	209.882	229.864	230.281	235.144	212.906	248.279	225.831	1814.89	249.004	251.461	210.797	237.313	215.081	231.832	232.654	209.23	213.885	225.074	423.146	310.976	323.174	792.25
4.975_222.11271	POS	4.975	222.113	C12 H15 N O3	4-[2-(Acetylamino)ethyl]phenyl acetate	1.12408	70.8448	level2	mzCloud										1.17956e+06	1.06401e+06	1.23493e+06	1.32449e+06	980035	1.22501e+06	1.32786e+06	1.00217e+06	1.04073e+06	1.29766e+06	1.03263e+06	948147	1.02478e+06	953403	1.07048e+06	1.75593e+06	892518	1.06171e+06	1.0673e+06	976672	517314	759665	613194	571946	573844	673845	851780	786059	1.24159e+06	1.40562e+06	542953
4.984_197.08128	POS	4.984	197.081	C10 H12 O4	NP-014924	2.25983	69.5728	level2	mzCloud										100405	179115	157810	121982	110551	146431	143413	276510	203750	240090	131404	109277	175163	68823.7	126511	235858	158940	80458.1	106042	158240	41740.7	83607.7	51424.9	23042.4	68601	70335.6	54027.3	171259	62747.3	21668.9	224682
4.991_301.14341	POS	4.991	301.143	C18 H22 O5	NP-004999	-56611	67.8599	level2	mzCloud										66469.2	99259.5	122300	21570.3	40956.6	117232	129506	94946.1	125495	116156	49655	126139	87435.3	53804.5	101851	205526	246765	160228	328104	313757	202381	177707	695334	261391	258095	161727	201008	80583.6	16117.1	17544.5	533735
4.995_465.16073	NEG	4.995	465.161	C18 H28 O11	NP-019569	109493	77.8159	level2	mzCloud										142.053	138.828	132.789	145.98	125.361	112.365	123.943	114.557	129.225	120.637	134.815	126.976	138.276	128.065	145.901	130.161	131.836	138.93	145.661	123.542	123.785	115.509	119.713	109.503	101.19	111.146	121.958	111.778	167.191	176.531	95.0592
5.001_265.14407	NEG	5.001	265.144	C15 H22 O4	NP-021701	-1.73524	84.7744	level2	mzCloud										2.12302e+06	2.14389e+06	2.15507e+06	2.67536e+06	1.90901e+06	4.87665e+06	1.76684e+06	1.96044e+06	1.02095e+06	1.85514e+06	1.44278e+06	2.07821e+06	2.27562e+06	1.43268e+06	1.54153e+06	2.02208e+06	1.78376e+06	1.98475e+06	1.98096e+06	1.64519e+06	1.03714e+06	511457	3.20856e+06	1.21003e+06	1.15084e+06	695617	320795	1.40582e+06	373748	255909	992646
5.024_269.17479	POS	5.024	269.175	C15 H24 O4	NP-018817	0.20448	83.586	level2	mzCloud										3.06007e+06	5.09369e+06	3.37836e+06	3.0666e+06	3.32637e+06	5.75828e+06	7.58947e+06	2.94662e+06	5.38676e+06	6.43718e+06	4.21094e+06	2.84488e+06	3.42441e+06	4.60617e+06	3.78245e+06	4.39337e+06	2.70043e+06	2.91953e+06	4.41056e+06	5.00133e+06	3.01577e+07	1.71928e+07	1.20126e+07	2.25711e+07	2.26126e+07	1.14495e+07	7.32002e+06	3.52088e+06	8.97989e+06	3.39372e+06	3.2716e+07
5.026_214.10765	POS	5.026	214.108	C16 H26 N8 O6	DRH	-499996	62.0264	level2	mzCloud										6.82037e+06	4.29324e+06	6.94205e+06	806774	4.83162e+06	5.27605e+06	1.94361e+06	3.84812e+06	4.04628e+06	1.10789e+07	2.27178e+06	4.81486e+06	1.6267e+06	5.63591e+06	5.69311e+06	3.24145e+06	4.12153e+06	1.92904e+06	1.52474e+06	750371	5.89503e+06	1.25083e+07	1.50269e+07	1.36344e+07	2.89857e+07	1.67452e+07	9.15072e+06	6.21471e+06	4.94962e+06	3.76684e+06	6.12015e+06
5.029_339.19129	POS	5.029	339.191	C20 H28 O3	NP-014175	69512.7	72.2602	level2	mzCloud										1.21444e+06	1.36458e+06	1.95261e+06	2.25024e+06	1.90062e+06	2.60941e+06	2.1358e+06	3.25632e+06	2.3824e+06	1.70556e+06	1.7537e+06	2.69695e+06	2.52155e+06	2.2639e+06	1.98092e+06	1.58223e+06	2.59517e+06	1.8053e+06	2.20747e+06	1.71649e+06	240401	93490.5	154091	181048	173058	157614	162030	311591	229171	246401	1.0702e+06
5.032_265.14350	POS	5.032	265.144	C15 H20 O4	4,9-dihydroxy-6-methyl-3,10-dimethylidene-2H,3H,3aH,4H,7H,8H,9H,10H,11H,11aH-cyclodeca[b]furan-2-one	0.246764	78.8439	level2	mzCloud										1.38319e+07	1.37779e+07	1.52823e+07	1.62065e+07	1.60176e+07	1.59503e+07	1.54501e+07	1.50551e+07	1.59193e+07	1.43413e+07	1.24484e+07	1.73391e+07	1.55057e+07	1.40568e+07	1.20836e+07	1.34314e+07	1.3583e+07	1.3215e+07	1.5931e+07	1.41282e+07	7.83106e+06	6.34189e+06	6.31182e+06	8.05093e+06	6.78589e+06	3.02853e+06	2.34175e+06	4.10483e+06	2.08706e+06	2.03516e+06	8.06138e+06
5.042_234.11264	POS	5.042	234.113	C13 H15 N O3	1-Ethyl-6,7-dimethoxyisoquinolin-3-ol	0.742105	61.7527	level2	mzCloud										142347	167307	294826	51448.3	202791	39069.7	189471	192973	152406	344274	157980	123828	112066	193816	127251	52025.6	102471	101817	120363	144933	193769	1.54626e+06	130545	118168	248591	1.0628e+06	1.00623e+06	4.16584e+06	474698	1.43197e+06	42979.9
5.043_253.14110	POS	5.043	253.141	C12 H22 O4	NP-006656	95510.9	89.1613	level2	mzCloud										7.73785e+06	7.77523e+06	7.52613e+06	8.92829e+06	6.78553e+06	5.83653e+06	7.52974e+06	6.59105e+06	6.71558e+06	7.34813e+06	8.09663e+06	7.12948e+06	7.47331e+06	6.51909e+06	5.43006e+06	8.33277e+06	7.40442e+06	7.64536e+06	9.64034e+06	6.95179e+06	1.01678e+07	1.011e+07	4.00218e+06	1.09069e+07	8.96503e+06	7.1281e+06	3.47658e+06	2.23939e+06	3.30678e+06	3.05818e+06	1.68572e+07
5.044_299.17540	POS	5.044	299.175	C18 H22 N2 O2	N-(2-furylmethylidene)-(4-{[(2-furylmethylidene)amino]methyl}cyclohexyl)methanamine	-0.0276791	72.2359	level2	mzCloud										695830	583402	253939	347244	787827	2.67501e+06	950082	713069	747323	1.67979e+06	1.02347e+06	888357	619075	2.54164e+06	546896	510367	1.11496e+06	710439	813742	720357	710266	208553	231138	123648	266354	8.01207e+06	8.01061e+06	6.34667e+06	6.70312e+06	3.02733e+06	3.37633e+06
5.045_195.06388	POS	5.045	195.064	C10 H10 O4	NP-019445	-6.74391	78.4584	level2	mzCloud										388281	368698	59314.5	881455	237250	33246.4	204309	118671	118039	120155	879218	235885	399584	77023.8	164481	269722	86347.3	999088	186201	44164.9	124411	97791.5	80749.2	192818	298661	1.26503e+06	439373	53527.4	66289.7	444068	498082
5.06_215.21204	POS	5.06	215.212	C12 H26 N2 O	dodecanohydrazide	1.14901	69.9762	level2	mzCloud										258759	352610	73712.4	81657.6	69519.1	172102	53188.1	73042.2	306590	105917	55723	12960.6	13336.2	13225.6	39133.5	1.8037e+06	13264.7	39329.5	15765.9	160169	14371.9	12863.8	9487.61	16530.7	13620.1	23838.5	24076.7	11696.2	9248.38	78469.6	20041.4
5.086_352.21175	POS	5.086	352.212	C19 H26 O5	(3S,3aR,4S,4aR,7aR,8R,9aR)-3,4a,8-trimethyl-2,5-dioxo-2H,3H,3aH,4H,4aH,5H,7aH,8H,9H,9aH-azuleno[6,5-b]furan-4-yl 2-methylpropanoate	50950.2	60.4459	level2	mzCloud										2.22936e+07	1.60196e+07	1.83874e+07	2.54223e+07	2.63705e+07	1.25758e+07	1.40488e+07	1.74434e+07	1.07489e+07	1.89529e+07	1.3734e+07	1.40404e+07	2.2567e+07	1.74028e+07	9.34569e+06	2.17405e+07	6.55406e+06	1.89083e+07	8.53749e+06	2.9941e+07	197773	145503	216502	100240	202888	1.76178e+06	1.24247e+06	203830	174102	402324	423848
5.089_235.10787	POS	5.089	235.108	C12 H14 N2 O3	4-ethoxy-6,7-dimethoxyquinazoline	0.61239	65.1399	level2	mzCloud										3.45011e+06	1.19199e+06	615642	279037	478421	1.91406e+06	2.73982e+06	1.65535e+06	1.14724e+06	1.67558e+06	2.01592e+06	1.75301e+06	1.45823e+06	666387	696651	3.22792e+06	727829	2.38298e+06	1.37232e+06	1.24019e+06	2.22941e+07	1.56357e+07	2.45201e+07	2.2253e+07	2.51796e+07	2.58354e+07	1.86297e+07	1.04461e+07	7.85784e+06	1.1642e+07	1.15724e+07
5.089_283.15400	POS	5.089	283.154	C15 H22 O5	NP-004987	0.0689919	76.6963	level2	mzCloud										1.51517e+07	1.19412e+07	2.30697e+07	2.31166e+07	2.05442e+07	2.46375e+07	2.25137e+07	2.17866e+07	1.65521e+07	1.90904e+07	1.27558e+07	2.48314e+07	1.87691e+07	1.81618e+07	1.68137e+07	8.66458e+06	1.8651e+07	1.18174e+07	1.1266e+07	9.90081e+06	1.75533e+06	2.00215e+06	907656	2.18425e+06	1.41385e+06	1.51259e+06	1.36107e+06	469639	820103	1.96498e+06	1.95507e+06
5.091_367.21237	NEG	5.091	367.212	C20 H32 O6	Thromboxane B3	-0.652066	88.6433	level2	mzCloud										679657	324796	292018	228136	377643	413789	837023	332244	429379	789328	330779	363017	426749	168320	269107	156968	189646	489746	636814	762092	148480	67298.7	132662	133710	104052	27491.8	29572.1	76029.9	28112.7	39047.7	263191
5.141_213.14878	POS	5.141	213.149	C12 H22 O4	NP-004036	-78253.9	83.5461	level2	mzCloud										2.23679e+06	3.11531e+07	3.15543e+07	2.76719e+07	2.88045e+07	1.3432e+07	3.08419e+07	3.00925e+07	1.7037e+07	3.26446e+07	1.5832e+07	2.14161e+07	9.14027e+06	1.90033e+07	6.65002e+06	2.70032e+07	2.69922e+07	1.4139e+07	2.40469e+07	1.37378e+07	1.67464e+07	7.48828e+06	9.97702e+06	1.21185e+07	1.4495e+07	1.47778e+07	4.47066e+06	7.44481e+06	1.95937e+06	3.68556e+06	1.08602e+07
5.141_403.21560	NEG	5.141	403.216	C21 H32 N4 O2 S	1-(4-Methoxyphenyl)-3-{[(2R,4S,5S)-5-(4-thiomorpholinylmethyl)-1-azabicyclo[2.2.2]oct-2-yl]methyl}urea	-4.2453	74.1905	level2	mzCloud										18425.7	15289.6	178858	28081.7	22888.7	11415.9	7636.45	7971.12	5948.34	8265.92	285.322	250.161	292.032	248.203	570.374	272.883	276.1	296.464	291.053	282.504	277.144	295.065	280.576	258.619	286.189	286.013	299.874	249.742	402.58	428.36	248.404
5.148_195.06559	POS	5.148	195.066	C10 H10 O4	NP-019988	2.06101	69.6506	level2	mzCloud										294081	351935	345710	439024	418858	387900	409541	871025	585361	527864	423868	334099	613052	246436	388495	557181	618477	276907	329972	508023	133889	93521.9	237410	131820	141976	155910	113961	132965	149455	65843.7	450810
5.162_283.15400	POS	5.162	283.154	C15 H22 O5	4,8-dihydroxy-6-(hydroxymethyl)-6,8-dimethyl-1H,3H,4H,4aH,5H,6H,7H,7aH,8H,9H-azuleno[5,6-c]furan-1-one	0.049971	66.7606	level2	mzCloud										3.29054e+06	891014	1.39834e+06	1.71213e+06	2.04321e+06	1.26975e+06	4.14324e+06	1.27688e+06	3.22007e+06	3.84033e+06	3.2974e+06	1.42316e+06	3.57e+06	1.07412e+06	1.0286e+06	2.48548e+06	1.0171e+06	2.58718e+06	3.06052e+06	5.85664e+06	1.00159e+07	3.15158e+06	1.54557e+06	4.77578e+06	2.69179e+06	4.46431e+06	4.00742e+06	2.51995e+06	3.85944e+06	2.14736e+06	5.86777e+06
5.166_339.10083	POS	5.166	339.101	C15 H18 N2 O5 S	2-morpholinophenyl 3,5-dimethyl-4-isoxazolesulfonate	-0.263315	70.3818	level2	mzCloud										978.667	920.014	2089.68	2386.12	1278.04	948.272	933.574	2008.22	1770.52	1766.72	1368.27	1687.19	1143.37	812.993	1571.06	1619.61	2484.1	1106.56	1029.88	988.365	1039.62	829.395	953.393	830.488	983.473	2451.45	2070.79	2126.72	1228.95	2688.91	696.755
5.168_209.11749	POS	5.168	209.117	C12 H18 O4	NP-021018	-79649.1	89.4865	level2	mzCloud										1.66536e+07	1.99615e+07	1.73465e+07	2.52456e+07	1.73091e+07	2.02406e+07	1.95946e+07	2.13889e+07	2.1789e+07	1.8269e+07	1.98744e+07	2.07269e+07	2.26729e+07	2.28711e+07	1.61252e+07	1.78768e+07	1.45066e+07	1.73219e+07	2.60309e+07	1.88763e+07	1.09876e+07	1.43373e+07	1.94763e+07	1.94085e+07	1.81433e+07	9.13509e+06	5.74686e+06	8.31575e+06	5.72413e+06	7.6507e+06	2.63972e+07
5.172_289.15470	POS	5.172	289.155	C16 H22 N2 O4	N-{4-[(2R,3R)-3-(Hydroxymethyl)-5-oxo-2-morpholinyl]phenyl}-3-methylbutanamide	-58827.6	67.8882	level2	mzCloud										524760	734245	722485	555839	509974	1.28754e+06	420237	596886	610942	2.26691e+06	521533	564679	548141	797334	791169	857748	522884	537915	1.06272e+06	554635	1.41205e+06	6.53886e+06	1.91797e+06	2.47166e+06	3.33797e+06	3.00211e+06	1.63543e+06	2.88744e+06	1.60616e+06	2.3607e+06	894720
5.186_317.11312	POS	5.186	317.113	C16 H9 [2]H3 F N3 O3	Flunitrazepam-d3	2.35082	67.3433	level2	mzCloud										396582	450202	489702	733555	551208	676276	612196	547310	555742	530158	445937	608358	524836	501707	399764	433636	537082	507396	535717	537363	1.05147e+06	590418	838517	1.09716e+06	976642	636366	563267	571619	406173	555835	553633
5.193_249.14862	POS	5.193	249.149	C15 H20 O3	(1S,2S,4R,7E,11S)-4,8-dimethyl-12-methylidene-3,14-dioxatricyclo[9.3.0.0脗?,芒聛麓]tetradec-7-en-13-one	0.409249	82.5471	level2	mzCloud										2.82326e+06	2.87286e+06	2.97907e+06	2.87937e+06	3.3932e+06	3.22633e+06	3.17996e+06	3.2123e+06	3.14822e+06	3.07351e+06	3.05586e+06	2.80655e+06	3.28554e+06	3.22681e+06	2.26158e+06	2.82119e+06	2.27215e+06	2.81641e+06	2.68299e+06	2.77801e+06	3.53368e+06	2.0307e+06	4.71477e+06	3.37176e+06	3.44671e+06	2.94656e+06	1.87303e+06	1.73099e+06	1.84679e+06	1.47917e+06	3.86153e+06
5.195_299.14888	POS	5.195	299.149	C15 H22 O6	NP-006370	-0.10131	78.6705	level2	mzCloud										5.26155e+06	5.24056e+06	3.91304e+06	4.15228e+06	3.2642e+06	2.21772e+06	2.992e+06	2.67992e+06	4.78626e+06	4.20906e+06	5.98548e+06	4.70917e+06	4.60429e+06	4.3206e+06	4.56656e+06	5.50969e+06	3.9163e+06	5.0644e+06	6.15731e+06	4.71909e+06	3.00702e+06	2.68376e+06	2.73842e+06	2.50602e+06	3.94682e+06	1.95462e+06	1.94024e+06	2.03806e+06	2.47516e+06	2.74405e+06	2.17415e+06
5.215_247.11906	POS	5.215	247.119	C11 H20 O7	2-Hydroxy-2-methyl-3-buten-1-yl beta-D-glucopyranoside	-68185.1	64.4648	level2	mzCloud										1.07725e+06	151587	128169	321607	783153	842512	594679	805465	319003	1.37167e+06	301605	583700	301383	205179	257205	1.05329e+06	255664	1.7411e+06	1.49607e+06	2.83173e+06	592713	585557	119010	801137	192825	2.00224e+06	1.68204e+06	1.10436e+06	900934	161035	1.26297e+06
5.229_263.08273	POS	5.229	263.083	C16 H10 N2 O2	2-phenyl[1,3]oxazolo[4,5-c]quinolin-4(5H)-one	4.66261	84.5661	level2	mzCloud										736.273	1814.49	645.839	671.498	669.288	753.97	711.173	637.571	757.05	929.546	618.97	698.656	723.716	707.177	837.989	2733.92	2051.48	2764.18	3501.25	2942.31	566.696	703.054	602.771	798.028	788.056	843.914	599.229	540.962	645.083	631.129	790.76
5.229_307.10882	POS	5.229	307.109	C18 H14 N2 O3	3-(1H-benzo[d]imidazol-2-yl)-6-ethyl-7-hydroxy-4H-chromen-4-one	3.60806	81.4085	level2	mzCloud										16543.2	17419.8	22494.3	24609.7	23060.2	28413.9	18267.1	34145.4	19710.1	15822.6	36267.9	24133.8	27714.4	18171.5	18551	28146.4	31988.9	23956.4	16084	20118.4	16380.8	12264.5	8931.16	15702.4	10765.8	21041.4	16774	7682.43	9431.11	11213.1	12924.5
5.229_311.14967	NEG	5.229	311.15	C16 H26 O7	tetranor-PGFM	-54550.8	74.407	level2	mzCloud										6.87931e+06	6.99581e+06	7.09628e+06	8.3446e+06	7.10702e+06	5.97816e+06	6.85925e+06	6.36999e+06	6.71963e+06	7.44173e+06	5.8691e+06	6.91579e+06	7.07048e+06	6.49063e+06	5.0341e+06	5.18726e+06	5.24101e+06	5.44154e+06	5.55481e+06	5.33954e+06	1.12493e+06	979015	1.44743e+06	1.39749e+06	1.30746e+06	1.67945e+06	1.02407e+06	1.29463e+06	941015	966625	585727
5.229_386.18619	POS	5.229	386.186	C16 H27 N5 O4 S	VMH	1.39124	63.8959	level2	mzCloud										705911	1.38768e+06	461798	654134	1.04232e+06	522495	180545	747180	308496	383626	639405	726594	491730	714866	1.04622e+06	340147	1.24198e+06	391392	505142	502289	4657.93	5299.56	4757.82	6016.09	6494.78	6966.13	4735.77	4480.49	4528.3	4969.11	6033.91
5.238_409.18974	NEG	5.238	409.19	C22 H26 N4 O4	N1-(3-Piperidinopropyl)-2-[(4-nitrobenzoyl)amino]benzamide	3.9359	70.7308	level2	mzCloud										261886	241659	291219	322853	266700	279981	527126	288422	320256	254976	194477	320808	257431	250811	163692	246024	251092	255253	284362	302355	321778	202878	248859	304970	318817	137556	83483.7	84661.7	56956.6	30859	288199
5.25_283.19037	POS	5.25	283.19	C16 H28 O5	13,14-dihydro-15-keto-tetranor Prostaglandin F1?	-59996.5	61.581	level2	mzCloud										270937	73666	270210	281332	133920	238987	261728	57242.4	336180	769640	332309	295667	278313	246789	242585	172294	242480	277194	298236	267421	343343	288777	913383	390503	579231	130174	306382	338041	213552	265633	543099
5.257_227.16437	POS	5.257	227.164	C13 H22 O3	5-(6-hydroxy-6-methyloctyl)-2,5-dihydrofuran-2-one	1.01704	75.4261	level2	mzCloud										5.26408e+06	4.60211e+06	4.98725e+06	4.76261e+06	4.72609e+06	4.66633e+06	5.2125e+06	2.93778e+06	3.18684e+06	5.12044e+06	3.08513e+06	4.68641e+06	5.12192e+06	4.36835e+06	3.43333e+06	3.24802e+06	4.97212e+06	3.3642e+06	5.14084e+06	4.44944e+06	856390	681855	766031	1.17107e+06	556413	696098	555434	1.19161e+06	704659	588680	3.08209e+06
5.264_357.09681	POS	5.264	357.097	C19 H16 O7	methyl 4-hydroxy-3-(4-hydroxyphenyl)-2-[(4-hydroxyphenyl)methyl]-5-oxo-2,5-dihydrofuran-2-carboxylate	-0.205503	62.804	level2	mzCloud										10354.1	10777.1	10170.9	11973	10523.6	9823.21	9645.08	10779.2	9325.22	11710.6	10343.6	9269.08	10333.6	9346.16	9973.74	23787.2	10132.1	11353.5	29160.7	40505.6	12538.8	7874.28	20732.3	9929.1	9347.09	11924.1	12256	8058.85	10151.9	10763.9	470443
5.27_315.12266	POS	5.27	315.123	C18 H18 O5	2-methyl-5-{2-[2-(4-methyl-3,6-dioxocyclohexa-1,4-dienyl)ethoxy]ethyl}benzo-1,4-quinone	-0.20311	74.0603	level2	mzCloud										2.61709e+06	2.93119e+06	1.44397e+06	1.07112e+06	1.27216e+06	2.78102e+06	3.17546e+06	3.01207e+06	2.69643e+06	3.85388e+06	2.82355e+06	2.19012e+06	2.55895e+06	2.11808e+06	2.6473e+06	2.74206e+06	2.53458e+06	4.79132e+06	5.26573e+06	5.243e+06	1.96702e+06	2.0149e+06	1.15895e+06	1.75957e+06	3.29245e+06	2.57141e+06	1.2885e+06	597550	2.5048e+06	1.25417e+06	5.14089e+06
5.3_299.18528	POS	5.3	299.185	C16 H26 O5	13,14-dihydro-15-keto-tetranor Prostaglandin E2	-0.0565574	68.0062	level2	mzCloud										229438	458806	365735	224609	134800	198716	323126	343766	146241	449052	250196	489050	420337	128472	141774	176344	227127	141715	188491	444933	3.17297e+06	1.42928e+06	818746	2.12575e+06	1.42691e+06	983435	1.01793e+06	254398	1.0719e+06	873164	2.60985e+06
5.301_281.17472	POS	5.301	281.175	C16 H24 O4	NP-016516	-0.06009	63.9815	level2	mzCloud										87697.6	16117.9	3043.35	3157.97	31844.4	3415.93	304824	16346.3	3137.78	590120	2965.12	2882.61	3120.77	3097.72	2799.81	2792.19	3340.73	3217.34	3299.59	861473	1.08073e+07	4.68291e+06	1.91806e+06	7.16729e+06	4.36462e+06	2.71596e+06	3.36331e+06	647798	3.55012e+06	2.85913e+06	7.49152e+06
[truncated: 19,111 more rows]
[truncated: 29 more columns]
