# Supplementary material for: Akkermansia muciniphila Enhances Resistance to Infectious Bronchitis Virus in Chickens Through γ-Aminobutyric Acid-Mediated Anti-Inflammatory Pathways
Source: Research Square preprint supplement (doi:10.21203/rs.3.rs-6786224/v1), 2025-06-25
Supplement: Supplementary file 6 [file 9e75cdf3f34a7434680f93b8.xlsx]

## Sheet: Adult
Table S6. Interaction network between microbiota and viruses in adult and young chicken groups.
Source	Target	Weight
Cloacibacillus_porcorum	Bacteroides_barnesiae	-0.774436
Cloacibacillus_porcorum	Desulfovibrio_piger	-0.609023
Cloacibacillus_porcorum	Bacteroides_coprophilus	-0.628571
Cloacibacillus_porcorum	Bacteroides_salanitronis	-0.806015
Cloacibacillus_porcorum	Oscillibacter_ruminantium	-0.581955
Cloacibacillus_porcorum	Megamonas_rupellensis	-0.515789
Cloacibacillus_porcorum	Bacteroides_plebeius	-0.914286
Cloacibacillus_porcorum	Odoribacter_laneus	-0.678195
Cloacibacillus_porcorum	Mucispirillum_schaedleri	-0.77594
Cloacibacillus_porcorum	Barnesiella_viscericola	-0.687218
Cloacibacillus_porcorum	Bacteroides_uniformis	-0.750376
Cloacibacillus_porcorum	Alistipes_shahii	-0.873684
Cloacibacillus_porcorum	Bacteroides_coprocola	-0.717293
Cloacibacillus_porcorum	Desulfovibrio_simplex	-0.574436
Cloacibacillus_porcorum	Elusimicrobium_minutum	-0.663158
Cloacibacillus_porcorum	Coprobacter_fastidiosus	-0.628571
Cloacibacillus_porcorum	Campylobacter_jejuni	-0.757428
Cloacibacillus_porcorum	Anaerotruncus_colihominis	-0.732331
Cloacibacillus_porcorum	Helicobacter_pullorum	-0.737119
Cloacibacillus_porcorum	Alistipes_finegoldii	-0.604511
Cloacibacillus_porcorum	Clostridium_methylpentosum	-0.502256
Cloacibacillus_porcorum	Acetanaerobacterium_elongatum	-0.717293
Cloacibacillus_porcorum	Barnesiella_intestinihominis	-0.728916
Cloacibacillus_porcorum	Hydrogenoanaerobacterium_saccharovorans	-0.557895
Cloacibacillus_porcorum	Alistipes_timonensis	-0.619627
Cloacibacillus_porcorum	Alistipes_indistinctus	-0.707785
Cloacibacillus_porcorum	Alistipes_onderdonkii	-0.898641
Cloacibacillus_porcorum	Bilophila_wadsworthia	-0.589767
Cloacibacillus_porcorum	Catabacter_hongkongensis	0.586482
Cloacibacillus_porcorum	Oscillibacter_valericigenes	-0.660368
Cloacibacillus_porcorum	Megrivirus_C	-0.566917
Cloacibacillus_porcorum	Melegrivirus_A	-0.553866
Cloacibacillus_porcorum	Goose_calicivirus	-0.513462
Cloacibacillus_porcorum	Chicken_microvirus_mg7_7	0.692987
Cloacibacillus_porcorum	Picobirnavirus_green_monkeyKNA2015	0.547443
Cloacibacillus_porcorum	Rabbit_picobirnavirus_1	0.575654
Faecalibacterium_prausnitzii	Butyricicoccus_pullicaecorum	0.586466
Faecalibacterium_prausnitzii	Intestinimonas_butyriciproducens	0.679699
Faecalibacterium_prausnitzii	Clostridium_sporosphaeroides	0.781955
Faecalibacterium_prausnitzii	Escherichia	-0.533835
Faecalibacterium_prausnitzii	Clostridium_leptum	0.62406
Faecalibacterium_prausnitzii	Clostridium_polysaccharolyticum	0.714286
Faecalibacterium_prausnitzii	Adlercreutzia_equolifaciens	0.745483
Faecalibacterium_prausnitzii	Lactobacillus_coleohominis	-0.643605
Faecalibacterium_prausnitzii	Corynebacterium_stationis	-0.592898
Faecalibacterium_prausnitzii	Enterorhabdus_caecimuris	-0.615196
Faecalibacterium_prausnitzii	Camula_virus	-0.515789
Faecalibacterium_prausnitzii	Husavirus_sp.	0.532619
Faecalibacterium_prausnitzii	Macaque_picobirnavirus_2	0.57057
Faecalibacterium_prausnitzii	Pink-eared_duck_picobirnavirus	0.640602
Faecalibacterium_prausnitzii	Dicistroviridae_sp.	0.630321
Faecalibacterium_prausnitzii	Nauglamirvirus_anduin	0.540663
Faecalibacterium_prausnitzii	Chicken_microvirus_mg6_154	-0.68991
Faecalibacterium_prausnitzii	Chicken_stool_associated_circular_virus_2	-0.676346
Faecalibacterium_prausnitzii	Thornevirus_SP15	0.690571
Faecalibacterium_prausnitzii	Picobirnavirus_PREDICT_PbV-38	-0.539537
Faecalibacterium_prausnitzii	Picobirnavirus_turkeyMD-2010	0.576117
Faecalibacterium_prausnitzii	Chicken_virus_mg6_2056	0.568161
Faecalibacterium_prausnitzii	Chicken_virus_mg4_1578	0.663443
Faecalibacterium_prausnitzii	Chicken_microvirus_mg8_48	-0.554967
Faecalibacterium_prausnitzii	Bacillus_phage_vB_BceM-HSE3	0.5045
Faecalibacterium_prausnitzii	Inoviridae_sp.	-0.501547
Bacteroides_barnesiae	Flavonifractor_plautii	0.675188
Bacteroides_barnesiae	Bacteroides_coprophilus	0.772932
Bacteroides_barnesiae	Akkermansia_muciniphila	-0.607519
Bacteroides_barnesiae	Bacteroides_salanitronis	0.873684
Bacteroides_barnesiae	Clostridium_lactatifermentans	0.586466
Bacteroides_barnesiae	Oscillibacter_ruminantium	0.753383
Bacteroides_barnesiae	Bacteroides_plebeius	0.854135
Bacteroides_barnesiae	Odoribacter_laneus	0.897744
Bacteroides_barnesiae	Mucispirillum_schaedleri	0.864662
Bacteroides_barnesiae	Barnesiella_viscericola	0.766917
Bacteroides_barnesiae	Bacteroides_uniformis	0.905263
Bacteroides_barnesiae	Alistipes_shahii	0.908271
Bacteroides_barnesiae	Bacteroides_coprocola	0.730827
Bacteroides_barnesiae	Desulfovibrio_simplex	0.742857
Bacteroides_barnesiae	Elusimicrobium_minutum	0.801504
Bacteroides_barnesiae	Coprobacter_fastidiosus	0.905263
Bacteroides_barnesiae	Campylobacter_jejuni	0.832644
Bacteroides_barnesiae	Anaerotruncus_colihominis	0.786466
Bacteroides_barnesiae	Helicobacter_pullorum	0.745393
Bacteroides_barnesiae	Alistipes_finegoldii	0.76391
Bacteroides_barnesiae	Clostridium_methylpentosum	0.789474
Bacteroides_barnesiae	Acetanaerobacterium_elongatum	0.771429
Bacteroides_barnesiae	Barnesiella_intestinihominis	0.721386
Bacteroides_barnesiae	Hydrogenoanaerobacterium_saccharovorans	0.721805
Bacteroides_barnesiae	Alistipes_timonensis	0.827176
Bacteroides_barnesiae	Alistipes_indistinctus	0.716811
Bacteroides_barnesiae	Alistipes_onderdonkii	0.843462
Bacteroides_barnesiae	Bilophila_wadsworthia	0.76883
Bacteroides_barnesiae	Clostridium_viride	0.592815
Bacteroides_barnesiae	Gallibacterium_anatis	0.607627
Bacteroides_barnesiae	Oscillibacter_valericigenes	0.503342
Bacteroides_barnesiae	Comamonas_kerstersii	0.520988
Bacteroides_barnesiae	Megrivirus_C	0.694737
Bacteroides_barnesiae	Fisa-like_virus	0.531338
Bacteroides_barnesiae	Melegrivirus_A	0.574063
Bacteroides_barnesiae	Picornavirales_sp.	0.554718
Bacteroides_barnesiae	Chicken_microvirus_mg7_7	-0.739076
Bacteroides_barnesiae	Macaque_picobirnavirus_20	-0.614572
Desulfovibrio_piger	Bacteroides_salanitronis	0.509774
Desulfovibrio_piger	Bacteroides_plebeius	0.509774
Desulfovibrio_piger	Mucispirillum_schaedleri	0.586466
Desulfovibrio_piger	Gemmiger_formicilis	-0.557895
Desulfovibrio_piger	Bacteroides_uniformis	0.578947
Desulfovibrio_piger	Bacteroides_coprocola	0.741353
Desulfovibrio_piger	Desulfovibrio_simplex	0.708271
Desulfovibrio_piger	Elusimicrobium_minutum	0.685714
Desulfovibrio_piger	Coprobacter_fastidiosus	0.512782
Desulfovibrio_piger	Campylobacter_jejuni	0.583678
Desulfovibrio_piger	Anaerotruncus_colihominis	0.709774
Desulfovibrio_piger	Helicobacter_pullorum	0.694246
Desulfovibrio_piger	Clostridium_polysaccharolyticum	-0.547368
Desulfovibrio_piger	Eubacterium_coprostanoligenes	-0.62426
Desulfovibrio_piger	Acetanaerobacterium_elongatum	0.702256
Desulfovibrio_piger	Barnesiella_intestinihominis	0.503013
Desulfovibrio_piger	Hydrogenoanaerobacterium_saccharovorans	0.538346
Desulfovibrio_piger	Clostridium_saccharogumia	-0.572932
Desulfovibrio_piger	Christensenella_minuta	-0.610526
Desulfovibrio_piger	Adlercreutzia_equolifaciens	-0.745483
Desulfovibrio_piger	Alistipes_onderdonkii	0.588058
Desulfovibrio_piger	Olsenella_scatoligenes	-0.517671
Desulfovibrio_piger	Gallibacterium_anatis	0.550768
Desulfovibrio_piger	Lactobacillus_saerimneri	0.553089
Desulfovibrio_piger	Corynebacterium_stationis	0.590922
Desulfovibrio_piger	Pink-eared_duck_picobirnavirus	-0.639098
Desulfovibrio_piger	Otarine_picobirnavirus	-0.541353
Desulfovibrio_piger	Beihai_blue_swimmer_crab_virus_2	-0.537759
Desulfovibrio_piger	Merch_tombus-like_virus	-0.555261
Desulfovibrio_piger	Caudoviricetes_sp.	-0.637834
Desulfovibrio_piger	Macaque_picobirnavirus_36	-0.503691
Megamonas_hypermegale	Flavonifractor_plautii	-0.606015
Megamonas_hypermegale	Clostridium_lactatifermentans	-0.696241
Megamonas_hypermegale	Megamonas_rupellensis	0.646617
Megamonas_hypermegale	Collinsella_tanakaei	0.682707
Megamonas_hypermegale	Clostridium_sporosphaeroides	-0.523308
Megamonas_hypermegale	Clostridium_leptum	-0.533835
Megamonas_hypermegale	Anaerovorax_odorimutans	-0.653298
Megamonas_hypermegale	Clostridium_saccharogumia	-0.524812
Megamonas_hypermegale	Corynebacterium_stationis	0.604756
Megamonas_hypermegale	Enterorhabdus_caecimuris	0.624876
Megamonas_hypermegale	Avian_coronavirus	-0.616541
Megamonas_hypermegale	Beihai_tombus-like_virus_15	0.598496
Megamonas_hypermegale	Chicken_virus_mg4_657	-0.513966
Megamonas_hypermegale	Cressdnaviricota_sp.	-0.625564
Megamonas_hypermegale	Microviridae_sp.	-0.520301
Megamonas_hypermegale	Leviviridae_sp.	0.595472
Megamonas_hypermegale	Chimpanzee_faeces_associated_circular_DNA_virus_1	-0.530077
Megamonas_hypermegale	Otarine_picobirnavirus	-0.532331
Megamonas_hypermegale	Chicken_picornavirus_HK-2014	-0.580451
Megamonas_hypermegale	Kristianstad_virus	-0.571984
Megamonas_hypermegale	Chicken_microvirus_mg6_154	0.566397
Megamonas_hypermegale	Kumba_picobirna-like_virus	-0.630075
Megamonas_hypermegale	Picobirnavirus_dogKNA2015	-0.582701
Megamonas_hypermegale	Odonata-associated_circular_virus-17	-0.515173
Megamonas_hypermegale	Chicken_microvirus_mg8_48	0.638857
Megamonas_hypermegale	Chicken_virus_mg8_273	-0.555011
Flavonifractor_plautii	Akkermansia_muciniphila	-0.6
Flavonifractor_plautii	Bacteroides_salanitronis	0.569925
Flavonifractor_plautii	Clostridium_lactatifermentans	0.920301
Flavonifractor_plautii	Oscillibacter_ruminantium	0.893233
Flavonifractor_plautii	Intestinimonas_butyriciproducens	0.697744
Flavonifractor_plautii	Bacteroides_plebeius	0.521805
Flavonifractor_plautii	Collinsella_tanakaei	-0.596992
Flavonifractor_plautii	Odoribacter_laneus	0.604511
Flavonifractor_plautii	Clostridium_sporosphaeroides	0.598496
Flavonifractor_plautii	Mucispirillum_schaedleri	0.548872
Flavonifractor_plautii	Barnesiella_viscericola	0.679699
Flavonifractor_plautii	Alistipes_shahii	0.598496
Flavonifractor_plautii	Desulfovibrio_simplex	0.529323
Flavonifractor_plautii	Elusimicrobium_minutum	0.553383
Flavonifractor_plautii	Coprobacter_fastidiosus	0.663158
Flavonifractor_plautii	Clostridium_leptum	0.679699
Flavonifractor_plautii	Anaerotruncus_colihominis	0.53985
Flavonifractor_plautii	Helicobacter_pullorum	0.511471
Flavonifractor_plautii	Alistipes_finegoldii	0.53985
Flavonifractor_plautii	Clostridium_methylpentosum	0.720301
Flavonifractor_plautii	Acetanaerobacterium_elongatum	0.606015
Flavonifractor_plautii	Barnesiella_intestinihominis	0.56476
Flavonifractor_plautii	Hydrogenoanaerobacterium_saccharovorans	0.512782
Flavonifractor_plautii	Alistipes_timonensis	0.68076
Flavonifractor_plautii	Anaerovorax_odorimutans	0.60902
Flavonifractor_plautii	Alistipes_indistinctus	0.740128
Flavonifractor_plautii	Alistipes_onderdonkii	0.602247
Flavonifractor_plautii	Bilophila_wadsworthia	0.688061
Flavonifractor_plautii	Aestuariispira_insulae	0.575704
Flavonifractor_plautii	Enterorhabdus_caecimuris	-0.662519
Flavonifractor_plautii	Avian_coronavirus	0.568421
Flavonifractor_plautii	Phacovirus_sp.	0.583459
Flavonifractor_plautii	Chicken_picornavirus_1	-0.532331
Flavonifractor_plautii	Phacovirus_Pf-CHK1PhV	0.604511
Flavonifractor_plautii	Chicken_virus_mg4_657	0.69359
Flavonifractor_plautii	Cressdnaviricota_sp.	0.627068
Flavonifractor_plautii	Chicken_picornavirus_5	0.531027
Flavonifractor_plautii	Circoviridae_sp.	0.728446
Flavonifractor_plautii	Pythium_polare_bunya-like_RNA_virus_1	-0.596591
Flavonifractor_plautii	Megrivirus_C	0.574436
Flavonifractor_plautii	Chicken_picornavirus_4	0.520578
Flavonifractor_plautii	Chicken_microvirus_mg6_154	-0.557574
Flavonifractor_plautii	Kumba_picobirna-like_virus	0.550376
Flavonifractor_plautii	Avisivirus_C	-0.526678
Flavonifractor_plautii	Fisa-like_virus	0.652521
Flavonifractor_plautii	Rabbit_picobirnavirus_5	-0.666726
Flavonifractor_plautii	Melegrivirus_A	0.697576
Flavonifractor_plautii	Lysoka_picobirna-like_virus	-0.508912
Flavonifractor_plautii	Chicken_microvirus_mg7_7	-0.52509
Flavonifractor_plautii	Chicken_virus_mg8_273	0.634783
Butyricicoccus_pullicaecorum	Clostridium_lactatifermentans	0.535338
Butyricicoccus_pullicaecorum	Intestinimonas_butyriciproducens	0.754887
Butyricicoccus_pullicaecorum	Clostridium_sporosphaeroides	0.708271
Butyricicoccus_pullicaecorum	Clostridium_polysaccharolyticum	0.821053
Butyricicoccus_pullicaecorum	Anaerovorax_odorimutans	0.546098
Butyricicoccus_pullicaecorum	Christensenella_minuta	0.657143
Butyricicoccus_pullicaecorum	Adlercreutzia_equolifaciens	0.653615
Butyricicoccus_pullicaecorum	Enterorhabdus_caecimuris	-0.593686
Butyricicoccus_pullicaecorum	Macaque_picobirnavirus_2	0.501136
Butyricicoccus_pullicaecorum	Pink-eared_duck_picobirnavirus	0.687218
Butyricicoccus_pullicaecorum	Otarine_picobirnavirus	0.580451
Butyricicoccus_pullicaecorum	Microviridae_phi-CA82	0.554561
Butyricicoccus_pullicaecorum	Fox_picobirnavirus	0.621286
Butyricicoccus_pullicaecorum	Chicken_microvirus_mg6_154	-0.557574
Butyricicoccus_pullicaecorum	Chicken_stool_associated_circular_virus_2	-0.662157
Butyricicoccus_pullicaecorum	Rabbit_picobirnavirus_5	-0.576051
Butyricicoccus_pullicaecorum	Turkey_picornavirus	-0.516248
Butyricicoccus_pullicaecorum	Grey_teal_picobirnavirus_X	-0.609252
Butyricicoccus_pullicaecorum	Merch_tombus-like_virus	0.504277
Butyricicoccus_pullicaecorum	Tasmanian_devil-associated_picobirnavirus_1	0.509331
Butyricicoccus_pullicaecorum	Picobirnavirus_PREDICT_PbV-83	0.663717
Butyricicoccus_pullicaecorum	Chicken_microvirus_mg8_95	0.590931
Bacteroides_coprophilus	Akkermansia_muciniphila	-0.621053
Bacteroides_coprophilus	Bacteroides_salanitronis	0.72782
Bacteroides_coprophilus	Oscillibacter_ruminantium	0.512782
Bacteroides_coprophilus	Bacteroides_plebeius	0.747368
Bacteroides_coprophilus	Odoribacter_laneus	0.684211
Bacteroides_coprophilus	Mucispirillum_schaedleri	0.718797
Bacteroides_coprophilus	Barnesiella_viscericola	0.639098
Bacteroides_coprophilus	Bacteroides_uniformis	0.730827
Bacteroides_coprophilus	Alistipes_shahii	0.681203
Bacteroides_coprophilus	Coprobacter_fastidiosus	0.643609
Bacteroides_coprophilus	Megamonas_funiformis	0.515789
Bacteroides_coprophilus	Campylobacter_jejuni	0.788266
Bacteroides_coprophilus	Anaerotruncus_colihominis	0.655639
Bacteroides_coprophilus	Alistipes_finegoldii	0.655639
Bacteroides_coprophilus	Clostridium_methylpentosum	0.553383
Bacteroides_coprophilus	Acetanaerobacterium_elongatum	0.521805
Bacteroides_coprophilus	Hydrogenoanaerobacterium_saccharovorans	0.580451
Bacteroides_coprophilus	Alistipes_timonensis	0.523023
Bacteroides_coprophilus	Alistipes_onderdonkii	0.608554
Bacteroides_coprophilus	Catabacter_hongkongensis	-0.597518
Bacteroides_coprophilus	Oscillibacter_valericigenes	0.588308
Bacteroides_coprophilus	Enterorhabdus_caecimuris	-0.518399
Bacteroides_coprophilus	Tremovirus_A	-0.572932
Bacteroides_coprophilus	Jingmen_picorna-like_virus	0.543675
Bacteroides_coprophilus	Macaque_picobirnavirus_2	0.521513
Bacteroides_coprophilus	Nacovirus_A	0.572744
Bacteroides_coprophilus	Megrivirus_C	0.756391
Bacteroides_coprophilus	Tundra_vole_stool-associated_circular_virus	0.558526
Bacteroides_coprophilus	Sicinivirus_10	0.536842
Bacteroides_coprophilus	Microviridae_phi-CA82	0.543955
Bacteroides_coprophilus	Dicistroviridae_sp.	0.628806
Bacteroides_coprophilus	Chicken_stool_associated_circular_virus_1	-0.511918
Bacteroides_coprophilus	Beihai_blue_swimmer_crab_virus_2	-0.501191
Bacteroides_coprophilus	Chicken_microvirus_mg7_7	-0.546488
Akkermansia_muciniphila	Olsenella_uli	0.652632
Akkermansia_muciniphila	Collinsella_tanakaei	0.825564
Akkermansia_muciniphila	Odoribacter_laneus	-0.55188
Akkermansia_muciniphila	Mucispirillum_schaedleri	-0.57594
Akkermansia_muciniphila	Barnesiella_viscericola	-0.584962
Akkermansia_muciniphila	Bacteroides_uniformis	-0.590977
Akkermansia_muciniphila	Alistipes_shahii	-0.53985
Akkermansia_muciniphila	Desulfovibrio_simplex	-0.541353
Akkermansia_muciniphila	Escherichia	0.627068
Akkermansia_muciniphila	Coprobacter_fastidiosus	-0.607519
Akkermansia_muciniphila	Lactobacillus_aviarius	0.646617
Akkermansia_muciniphila	Anaerotruncus_colihominis	-0.633083
Akkermansia_muciniphila	Helicobacter_pullorum	-0.546822
Akkermansia_muciniphila	Lactobacillus_salivarius	0.565414
Akkermansia_muciniphila	Blautia_glucerasea	0.533835
Akkermansia_muciniphila	Clostridium_methylpentosum	-0.643609
Akkermansia_muciniphila	Acetanaerobacterium_elongatum	-0.646617
Akkermansia_muciniphila	Hydrogenoanaerobacterium_saccharovorans	-0.828571
Akkermansia_muciniphila	Lactobacillus_equi	0.523023
Akkermansia_muciniphila	Alistipes_timonensis	-0.55623
Akkermansia_muciniphila	Lactobacillus_ingluviei	0.502902
Akkermansia_muciniphila	Alistipes_onderdonkii	-0.668463
Akkermansia_muciniphila	Bilophila_wadsworthia	-0.561574
Akkermansia_muciniphila	Enterorhabdus_caecimuris	0.645311
Akkermansia_muciniphila	Avian_coronavirus	-0.571429
Akkermansia_muciniphila	Microviridae_sp.	-0.518797
Akkermansia_muciniphila	Megrivirus_C	-0.62406
Akkermansia_muciniphila	Chimpanzee_faeces_associated_circular_DNA_virus_1	-0.596144
Akkermansia_muciniphila	Microviridae_phi-CA82	-0.546985
Akkermansia_muciniphila	Chicken_picornavirus_HK-2014	-0.536842
Akkermansia_muciniphila	Dicistroviridae_sp.	-0.560622
Akkermansia_muciniphila	Chicken_stool_associated_circular_virus_1	0.520463
Akkermansia_muciniphila	Chicken_microvirus_mg6_154	0.502875
Akkermansia_muciniphila	Avian_nephritis_virus_3	-0.511284
Akkermansia_muciniphila	Melegrivirus_A	-0.573286
Akkermansia_muciniphila	Chicken_microvirus_mg7_7	0.579409
Akkermansia_muciniphila	Jingmen_picobirna-like_virus_1	-0.513462
Akkermansia_muciniphila	Chicken_microvirus_mg8_48	0.537759
Olsenella_uli	Collinsella_tanakaei	0.637594
Olsenella_uli	Bacteroides_uniformis	-0.502256
Olsenella_uli	Desulfovibrio_simplex	-0.62406
Olsenella_uli	Escherichia	0.667669
Olsenella_uli	Lactobacillus_salivarius	0.58797
Olsenella_uli	Blautia_glucerasea	0.64812
Olsenella_uli	Coprococcus_comes	0.554887
Olsenella_uli	Acetanaerobacterium_elongatum	-0.514286
Olsenella_uli	Enterococcus_cecorum	0.664662
Olsenella_uli	Hydrogenoanaerobacterium_saccharovorans	-0.652632
Olsenella_uli	Lactobacillus_equi	0.630948
Olsenella_uli	Lactobacillus_ingluviei	0.61034
Olsenella_uli	Olsenella_scatoligenes	0.549919
Olsenella_uli	Qubevirus_faecium	0.589411
Olsenella_uli	Dicistroviridae_sp.	-0.530318
Olsenella_uli	Gervais_tombus-like_virus	0.504093
Olsenella_uli	Picornavirales_Bu-3	-0.553407
Olsenella_uli	Jingmen_picobirna-like_virus_1	-0.55581
Olsenella_uli	Wuhan_arthropod_virus_2	-0.500718
Bacteroides_salanitronis	Clostridium_lactatifermentans	0.509774
Bacteroides_salanitronis	Oscillibacter_ruminantium	0.744361
Bacteroides_salanitronis	Bacteroides_plebeius	0.900752
Bacteroides_salanitronis	Odoribacter_laneus	0.87218
Bacteroides_salanitronis	Mucispirillum_schaedleri	0.831579
Bacteroides_salanitronis	Barnesiella_viscericola	0.78797
Bacteroides_salanitronis	Bacteroides_uniformis	0.83609
Bacteroides_salanitronis	Alistipes_shahii	0.911278
Bacteroides_salanitronis	Bacteroides_coprocola	0.768421
Bacteroides_salanitronis	Desulfovibrio_simplex	0.678195
Bacteroides_salanitronis	Elusimicrobium_minutum	0.756391
Bacteroides_salanitronis	Coprobacter_fastidiosus	0.846617
Bacteroides_salanitronis	Campylobacter_jejuni	0.84167
Bacteroides_salanitronis	Anaerotruncus_colihominis	0.798496
Bacteroides_salanitronis	Helicobacter_pullorum	0.682964
Bacteroides_salanitronis	Alistipes_finegoldii	0.717293
Bacteroides_salanitronis	Clostridium_methylpentosum	0.730827
Bacteroides_salanitronis	Acetanaerobacterium_elongatum	0.759398
Bacteroides_salanitronis	Barnesiella_intestinihominis	0.847893
Bacteroides_salanitronis	Hydrogenoanaerobacterium_saccharovorans	0.628571
Bacteroides_salanitronis	Alistipes_timonensis	0.784157
Bacteroides_salanitronis	Alistipes_indistinctus	0.832644
Bacteroides_salanitronis	Alistipes_onderdonkii	0.818236
Bacteroides_salanitronis	Bilophila_wadsworthia	0.614912
Bacteroides_salanitronis	Clostridium_viride	0.659106
Bacteroides_salanitronis	Catabacter_hongkongensis	-0.531302
Bacteroides_salanitronis	Megrivirus_C	0.697744
Bacteroides_salanitronis	Melegrivirus_A	0.640092
Bacteroides_salanitronis	Chicken_microvirus_mg7_7	-0.658419
Bacteroides_salanitronis	Macaque_picobirnavirus_20	-0.545483
Clostridium_lactatifermentans	Oscillibacter_ruminantium	0.831579
Clostridium_lactatifermentans	Intestinimonas_butyriciproducens	0.732331
Clostridium_lactatifermentans	Collinsella_tanakaei	-0.571429
Clostridium_lactatifermentans	Odoribacter_laneus	0.577444
Clostridium_lactatifermentans	Clostridium_sporosphaeroides	0.715789
Clostridium_lactatifermentans	Barnesiella_viscericola	0.6
Clostridium_lactatifermentans	Alistipes_shahii	0.550376
Clostridium_lactatifermentans	Coprobacter_fastidiosus	0.550376
Clostridium_lactatifermentans	Clostridium_leptum	0.702256
Clostridium_lactatifermentans	Alistipes_finegoldii	0.574436
Clostridium_lactatifermentans	Clostridium_methylpentosum	0.645113
Clostridium_lactatifermentans	Alistipes_timonensis	0.643023
Clostridium_lactatifermentans	Anaerovorax_odorimutans	0.710005
Clostridium_lactatifermentans	Alistipes_indistinctus	0.685972
Clostridium_lactatifermentans	Anaerorhabdus_furcosa	0.583459
Clostridium_lactatifermentans	Bilophila_wadsworthia	0.61415
Clostridium_lactatifermentans	Olsenella_scatoligenes	0.547373
Clostridium_lactatifermentans	Aestuariispira_insulae	0.539421
Clostridium_lactatifermentans	Enterorhabdus_caecimuris	-0.696935
Clostridium_lactatifermentans	Phacovirus_sp.	0.663158
Clostridium_lactatifermentans	Chicken_picornavirus_1	-0.502256
Clostridium_lactatifermentans	Phacovirus_Pf-CHK1PhV	0.699248
Clostridium_lactatifermentans	Chicken_virus_mg4_657	0.65208
Clostridium_lactatifermentans	Cressdnaviricota_sp.	0.618045
Clostridium_lactatifermentans	Circoviridae_sp.	0.699491
Clostridium_lactatifermentans	Pythium_polare_bunya-like_RNA_virus_1	-0.619118
Clostridium_lactatifermentans	Chicken_picornavirus_HK-2014	0.541353
Clostridium_lactatifermentans	Chicken_microvirus_mg6_154	-0.682852
Clostridium_lactatifermentans	Chicken_stool_associated_circular_virus_2	-0.507653
Clostridium_lactatifermentans	Kumba_picobirna-like_virus	0.517293
Clostridium_lactatifermentans	Fisa-like_virus	0.623779
Clostridium_lactatifermentans	Rabbit_picobirnavirus_5	-0.675108
Clostridium_lactatifermentans	Melegrivirus_A	0.511918
Clostridium_lactatifermentans	Halophytophthora_RNA_virus_7	0.503342
Clostridium_lactatifermentans	Thornevirus_SP15	0.516985
Clostridium_lactatifermentans	Equine_infectious_anemia_virus	0.512046
Clostridium_lactatifermentans	Lysoka_picobirna-like_virus	-0.538575
Clostridium_lactatifermentans	Chicken_microvirus_mg8_48	-0.513022
Clostridium_lactatifermentans	Chicken_virus_mg8_273	0.50579
Clostridium_lactatifermentans	Macaque_picobirnavirus_20	-0.527809
Oscillibacter_ruminantium	Intestinimonas_butyriciproducens	0.610526
Oscillibacter_ruminantium	Bacteroides_plebeius	0.717293
Oscillibacter_ruminantium	Odoribacter_laneus	0.661654
Oscillibacter_ruminantium	Clostridium_sporosphaeroides	0.515789
Oscillibacter_ruminantium	Mucispirillum_schaedleri	0.664662
Oscillibacter_ruminantium	Barnesiella_viscericola	0.753383
Oscillibacter_ruminantium	Bacteroides_uniformis	0.627068
Oscillibacter_ruminantium	Alistipes_shahii	0.750376
Oscillibacter_ruminantium	Bacteroides_coprocola	0.627068
Oscillibacter_ruminantium	Desulfovibrio_simplex	0.589474
Oscillibacter_ruminantium	Elusimicrobium_minutum	0.633083
Oscillibacter_ruminantium	Coprobacter_fastidiosus	0.762406
Oscillibacter_ruminantium	Campylobacter_jejuni	0.600978
Oscillibacter_ruminantium	Clostridium_leptum	0.572932
Oscillibacter_ruminantium	Anaerotruncus_colihominis	0.675188
Oscillibacter_ruminantium	Helicobacter_pullorum	0.58443
Oscillibacter_ruminantium	Alistipes_finegoldii	0.619549
Oscillibacter_ruminantium	Clostridium_methylpentosum	0.765414
Oscillibacter_ruminantium	Acetanaerobacterium_elongatum	0.67218
Oscillibacter_ruminantium	Barnesiella_intestinihominis	0.685242
Oscillibacter_ruminantium	Hydrogenoanaerobacterium_saccharovorans	0.521805
Oscillibacter_ruminantium	Alistipes_timonensis	0.727552
Oscillibacter_ruminantium	Alistipes_indistinctus	0.8695
Oscillibacter_ruminantium	Alistipes_onderdonkii	0.712607
Oscillibacter_ruminantium	Bilophila_wadsworthia	0.704063
Oscillibacter_ruminantium	Aestuariispira_insulae	0.553934
Oscillibacter_ruminantium	Phacovirus_sp.	0.548872
Oscillibacter_ruminantium	Chicken_picornavirus_1	-0.565414
Oscillibacter_ruminantium	Phacovirus_Pf-CHK1PhV	0.559398
Oscillibacter_ruminantium	Chicken_virus_mg4_657	0.554721
Oscillibacter_ruminantium	Chicken_picornavirus_5	0.594208
Oscillibacter_ruminantium	Circoviridae_sp.	0.56386
Oscillibacter_ruminantium	Pythium_polare_bunya-like_RNA_virus_1	-0.571733
Oscillibacter_ruminantium	Megrivirus_C	0.604511
Oscillibacter_ruminantium	Chicken_picornavirus_4	0.505315
Oscillibacter_ruminantium	Phacovirus_TRPhV	0.523777
Oscillibacter_ruminantium	Picobirnavirus_GIPBVturkeyUSAMN-12011	-0.60229
Oscillibacter_ruminantium	Fisa-like_virus	0.563188
Oscillibacter_ruminantium	Rabbit_picobirnavirus_5	-0.544048
Oscillibacter_ruminantium	Melegrivirus_A	0.70146
Oscillibacter_ruminantium	Halophytophthora_RNA_virus_7	0.584006
Oscillibacter_ruminantium	Chicken_microvirus_mg7_7	-0.538258
Oscillibacter_ruminantium	Macaque_picobirnavirus_20	-0.520578
Megamonas_rupellensis	Megamonas_funiformis	0.846617
Megamonas_rupellensis	Anaerovorax_odorimutans	-0.535223
Megamonas_rupellensis	Oscillibacter_valericigenes	0.597988
Megamonas_rupellensis	Microviridae_sp.	-0.509774
Megamonas_rupellensis	Sewage-associated_circular_DNA_virus-9	-0.625499
Megamonas_rupellensis	Kumba_picobirna-like_virus	-0.505263
Intestinimonas_butyriciproducens	Clostridium_sporosphaeroides	0.792481
Intestinimonas_butyriciproducens	Clostridium_leptum	0.66015
Intestinimonas_butyriciproducens	Clostridium_polysaccharolyticum	0.655639
Intestinimonas_butyriciproducens	Anaerovorax_odorimutans	0.546098
Intestinimonas_butyriciproducens	Christensenella_minuta	0.627068
Intestinimonas_butyriciproducens	Adlercreutzia_equolifaciens	0.513555
Intestinimonas_butyriciproducens	Bilophila_wadsworthia	0.529571
Intestinimonas_butyriciproducens	Aestuariispira_insulae	0.529745
Intestinimonas_butyriciproducens	Enterorhabdus_caecimuris	-0.580779
Intestinimonas_butyriciproducens	Phacovirus_sp.	0.664662
Intestinimonas_butyriciproducens	Phacovirus_Pf-CHK1PhV	0.729323
Intestinimonas_butyriciproducens	Chicken_picornavirus_UCCPhV	0.553383
Intestinimonas_butyriciproducens	Pink-eared_duck_picobirnavirus	0.577444
Intestinimonas_butyriciproducens	Microviridae_phi-CA82	0.665171
Intestinimonas_butyriciproducens	Chicken_picornavirus_HK-2014	0.556391
Intestinimonas_butyriciproducens	Dicistroviridae_sp.	0.569713
Intestinimonas_butyriciproducens	Chicken_virus_mg5_2197	0.6238
Intestinimonas_butyriciproducens	Nauglamirvirus_anduin	0.569278
Intestinimonas_butyriciproducens	Chicken_microvirus_mg6_154	-0.691674
Intestinimonas_butyriciproducens	Chicken_stool_associated_circular_virus_2	-0.575446
Intestinimonas_butyriciproducens	Fisa-like_virus	0.56008
Intestinimonas_butyriciproducens	Rabbit_picobirnavirus_5	-0.621008
Intestinimonas_butyriciproducens	Halophytophthora_RNA_virus_7	0.629178
Intestinimonas_butyriciproducens	Chicken_microvirus_mg8_48	-0.537759
Bacteroides_plebeius	Odoribacter_laneus	0.803008
Bacteroides_plebeius	Mucispirillum_schaedleri	0.801504
Bacteroides_plebeius	Barnesiella_viscericola	0.796992
Bacteroides_plebeius	Bacteroides_uniformis	0.748872
Bacteroides_plebeius	Alistipes_shahii	0.929323
Bacteroides_plebeius	Bacteroides_coprocola	0.750376
Bacteroides_plebeius	Desulfovibrio_simplex	0.556391
Bacteroides_plebeius	Elusimicrobium_minutum	0.685714
Bacteroides_plebeius	Coprobacter_fastidiosus	0.741353
Bacteroides_plebeius	Campylobacter_jejuni	0.8349
Bacteroides_plebeius	Anaerotruncus_colihominis	0.769925
Bacteroides_plebeius	Helicobacter_pullorum	0.658142
Bacteroides_plebeius	Alistipes_finegoldii	0.757895
Bacteroides_plebeius	Clostridium_methylpentosum	0.610526
Bacteroides_plebeius	Acetanaerobacterium_elongatum	0.709774
Bacteroides_plebeius	Barnesiella_intestinihominis	0.81476
Bacteroides_plebeius	Hydrogenoanaerobacterium_saccharovorans	0.556391
Bacteroides_plebeius	Alistipes_timonensis	0.725288
Bacteroides_plebeius	Alistipes_indistinctus	0.805566
Bacteroides_plebeius	Alistipes_onderdonkii	0.851344
Bacteroides_plebeius	Bilophila_wadsworthia	0.589767
Bacteroides_plebeius	Clostridium_viride	0.508236
Bacteroides_plebeius	Catabacter_hongkongensis	-0.56441
Bacteroides_plebeius	Oscillibacter_valericigenes	0.688331
Bacteroides_plebeius	Picobirnavirus_sp.	-0.500752
Bacteroides_plebeius	Megrivirus_C	0.633083
Bacteroides_plebeius	Sicinivirus_10	0.503759
Bacteroides_plebeius	Melegrivirus_A	0.547651
Bacteroides_plebeius	Goose_calicivirus	0.508169
Bacteroides_plebeius	Rabbit_picobirnavirus_3	-0.556364
Bacteroides_plebeius	Chicken_microvirus_mg7_7	-0.69134
Bacteroides_plebeius	Macaque_picobirnavirus_20	-0.571994
Bacteroides_plebeius	Rabbit_picobirnavirus_1	-0.586778
Collinsella_tanakaei	Escherichia	0.581955
Collinsella_tanakaei	Lactobacillus_aviarius	0.603008
Collinsella_tanakaei	Lactobacillus_salivarius	0.569925
Collinsella_tanakaei	Blautia_glucerasea	0.593985
Collinsella_tanakaei	Clostridium_methylpentosum	-0.523308
Collinsella_tanakaei	Enterococcus_cecorum	0.604511
Collinsella_tanakaei	Hydrogenoanaerobacterium_saccharovorans	-0.574436
Collinsella_tanakaei	Lactobacillus_equi	0.535098
Collinsella_tanakaei	Enterorhabdus_caecimuris	0.696935
Collinsella_tanakaei	Beihai_tombus-like_virus_15	0.542857
Collinsella_tanakaei	Phacovirus_Pf-CHK1PhV	-0.556391
Collinsella_tanakaei	Leviviridae_sp.	0.500014
Collinsella_tanakaei	Megrivirus_C	-0.542857
Collinsella_tanakaei	Chimpanzee_faeces_associated_circular_DNA_virus_1	-0.562342
Collinsella_tanakaei	Microviridae_phi-CA82	-0.595472
Collinsella_tanakaei	Chicken_picornavirus_HK-2014	-0.633083
Collinsella_tanakaei	Dicistroviridae_sp.	-0.578804
Collinsella_tanakaei	Kristianstad_virus	-0.536341
Collinsella_tanakaei	Chicken_stool_associated_circular_virus_1	0.660289
Collinsella_tanakaei	Chicken_microvirus_mg6_154	0.651091
Collinsella_tanakaei	Kumba_picobirna-like_virus	-0.506767
Collinsella_tanakaei	Fisa-like_virus	-0.629217
Collinsella_tanakaei	Thornevirus_SP15	-0.640005
Collinsella_tanakaei	Picobirnavirus_dogKNA2015	-0.502045
Collinsella_tanakaei	Chicken_microvirus_mg8_48	0.608743
Odoribacter_laneus	Mucispirillum_schaedleri	0.816541
Odoribacter_laneus	Barnesiella_viscericola	0.604511
Odoribacter_laneus	Bacteroides_uniformis	0.765414
Odoribacter_laneus	Alistipes_shahii	0.83609
Odoribacter_laneus	Bacteroides_coprocola	0.717293
Odoribacter_laneus	Desulfovibrio_simplex	0.774436
Odoribacter_laneus	Elusimicrobium_minutum	0.721805
Odoribacter_laneus	Coprobacter_fastidiosus	0.827068
Odoribacter_laneus	Campylobacter_jejuni	0.822114
Odoribacter_laneus	Anaerotruncus_colihominis	0.769925
Odoribacter_laneus	Helicobacter_pullorum	0.721324
Odoribacter_laneus	Alistipes_finegoldii	0.646617
Odoribacter_laneus	Clostridium_methylpentosum	0.852632
Odoribacter_laneus	Acetanaerobacterium_elongatum	0.756391
Odoribacter_laneus	Barnesiella_intestinihominis	0.750001
Odoribacter_laneus	Hydrogenoanaerobacterium_saccharovorans	0.652632
Odoribacter_laneus	Alistipes_timonensis	0.758496
Odoribacter_laneus	Alistipes_indistinctus	0.704024
Odoribacter_laneus	Alistipes_onderdonkii	0.718913
Odoribacter_laneus	Bilophila_wadsworthia	0.701777
Odoribacter_laneus	Clostridium_viride	0.550906
Odoribacter_laneus	Gallibacterium_anatis	0.527855
Odoribacter_laneus	Butyricimonas_synergistica	0.527326
Odoribacter_laneus	Megrivirus_C	0.508271
Odoribacter_laneus	Picornavirales_sp.	0.584347
Odoribacter_laneus	Chicken_microvirus_mg7_7	-0.701217
Odoribacter_laneus	Macaque_picobirnavirus_20	-0.635459
Clostridium_sporosphaeroides	Clostridium_leptum	0.846617
Clostridium_sporosphaeroides	Clostridium_polysaccharolyticum	0.709774
Clostridium_sporosphaeroides	Anaerovorax_odorimutans	0.528231
Clostridium_sporosphaeroides	Holdemania_filiformis	0.62406
Clostridium_sporosphaeroides	Clostridium_saccharogumia	0.557895
Clostridium_sporosphaeroides	Christensenella_minuta	0.595489
Clostridium_sporosphaeroides	Adlercreutzia_equolifaciens	0.6747
Clostridium_sporosphaeroides	Anaerorhabdus_furcosa	0.541353
Clostridium_sporosphaeroides	Olsenella_scatoligenes	0.522763
Clostridium_sporosphaeroides	Enterorhabdus_caecimuris	-0.699086
Clostridium_sporosphaeroides	Sicinivirus_sp.	-0.514286
Clostridium_sporosphaeroides	Phacovirus_sp.	0.577444
Clostridium_sporosphaeroides	Phacovirus_Pf-CHK1PhV	0.568421
Clostridium_sporosphaeroides	Pink-eared_duck_picobirnavirus	0.621053
Clostridium_sporosphaeroides	Chicken_microvirus_mg6_154	-0.60698
Clostridium_sporosphaeroides	Chicken_stool_associated_circular_virus_2	-0.550221
Clostridium_sporosphaeroides	Rabbit_picobirnavirus_5	-0.616436
Clostridium_sporosphaeroides	Picobirnavirus_PREDICT_PbV-43	-0.522285
Clostridium_sporosphaeroides	Halophytophthora_RNA_virus_7	0.581855
Clostridium_sporosphaeroides	Thornevirus_SP15	0.560759
Clostridium_sporosphaeroides	Picobirnavirus_turkeyMD-2010	0.52509
Clostridium_sporosphaeroides	Posa-like_virus	-0.602454
Mucispirillum_schaedleri	Barnesiella_viscericola	0.627068
Mucispirillum_schaedleri	Bacteroides_uniformis	0.834586
Mucispirillum_schaedleri	Alistipes_shahii	0.815038
Mucispirillum_schaedleri	Bacteroides_coprocola	0.768421
Mucispirillum_schaedleri	Desulfovibrio_simplex	0.757895
Mucispirillum_schaedleri	Elusimicrobium_minutum	0.757895
Mucispirillum_schaedleri	Coprobacter_fastidiosus	0.821053
Mucispirillum_schaedleri	Campylobacter_jejuni	0.787514
Mucispirillum_schaedleri	Anaerotruncus_colihominis	0.771429
Mucispirillum_schaedleri	Helicobacter_pullorum	0.870252
Mucispirillum_schaedleri	Alistipes_finegoldii	0.592481
Mucispirillum_schaedleri	Clostridium_methylpentosum	0.744361
Mucispirillum_schaedleri	Acetanaerobacterium_elongatum	0.795489
Mucispirillum_schaedleri	Barnesiella_intestinihominis	0.632531
Mucispirillum_schaedleri	Hydrogenoanaerobacterium_saccharovorans	0.676692
Mucispirillum_schaedleri	Alistipes_timonensis	0.792458
Mucispirillum_schaedleri	Alistipes_indistinctus	0.704776
Mucispirillum_schaedleri	Alistipes_onderdonkii	0.799318
Mucispirillum_schaedleri	Bilophila_wadsworthia	0.643105
Mucispirillum_schaedleri	Gallibacterium_anatis	0.631389
Mucispirillum_schaedleri	Catabacter_hongkongensis	-0.578599
Mucispirillum_schaedleri	Posavirus_1	0.502256
Mucispirillum_schaedleri	Megrivirus_C	0.554887
Mucispirillum_schaedleri	Fisa-like_virus	0.501043
Mucispirillum_schaedleri	Chicken_microvirus_mg7_7	-0.679818
Barnesiella_viscericola	Bacteroides_uniformis	0.669173
Barnesiella_viscericola	Alistipes_shahii	0.839098
Barnesiella_viscericola	Bacteroides_coprocola	0.643609
Barnesiella_viscericola	Elusimicrobium_minutum	0.67218
Barnesiella_viscericola	Coprobacter_fastidiosus	0.742857
Barnesiella_viscericola	Campylobacter_jejuni	0.634073
Barnesiella_viscericola	Anaerotruncus_colihominis	0.640602
Barnesiella_viscericola	Alistipes_finegoldii	0.893233
Barnesiella_viscericola	Clostridium_methylpentosum	0.506767
Barnesiella_viscericola	Acetanaerobacterium_elongatum	0.621053
Barnesiella_viscericola	Barnesiella_intestinihominis	0.787651
Barnesiella_viscericola	Hydrogenoanaerobacterium_saccharovorans	0.559398
Barnesiella_viscericola	Alistipes_timonensis	0.765288
Barnesiella_viscericola	Anaerovorax_odorimutans	0.504927
Barnesiella_viscericola	Alistipes_indistinctus	0.813088
Barnesiella_viscericola	Alistipes_onderdonkii	0.82139
Barnesiella_viscericola	Bilophila_wadsworthia	0.502902
Barnesiella_viscericola	Clostridium_viride	0.605006
Barnesiella_viscericola	Oscillibacter_valericigenes	0.601214
Barnesiella_viscericola	Enterorhabdus_caecimuris	-0.537759
Barnesiella_viscericola	Beihai_tombus-like_virus_15	-0.52782
Barnesiella_viscericola	Chicken_virus_mg4_657	0.551702
Barnesiella_viscericola	Chicken_microvirus_mg7_10	0.55188
Barnesiella_viscericola	Chicken_microvirus_mg4_115	0.542857
Barnesiella_viscericola	Nacovirus_A	0.540925
Barnesiella_viscericola	Pythium_polare_bunya-like_RNA_virus_1	-0.652521
Barnesiella_viscericola	Megrivirus_C	0.815038
Barnesiella_viscericola	Sicinivirus_10	0.631579
Barnesiella_viscericola	Chicken_picornavirus_HK-2014	0.556391
Barnesiella_viscericola	Chicken_picornavirus_4	0.523792
Barnesiella_viscericola	Melegrivirus_A	0.784579
Barnesiella_viscericola	Goose_calicivirus	0.554045
Barnesiella_viscericola	Rabbit_picobirnavirus_3	-0.500399
Barnesiella_viscericola	Lysoka_picobirna-like_virus	-0.534867
Barnesiella_viscericola	Chicken_microvirus_mg7_7	-0.564595
Barnesiella_viscericola	Macaque_picobirnavirus_20	-0.505315
Barnesiella_viscericola	Alces_alces_faeces_associated_microvirus_MP21_4718	0.52055
Gemmiger_formicilis	Eubacterium_coprostanoligenes	0.774265
Gemmiger_formicilis	Anaerovorax_odorimutans	0.512695
Gemmiger_formicilis	Christensenella_minuta	0.530827
Gemmiger_formicilis	Olsenella_scatoligenes	0.638178
Gemmiger_formicilis	Qubevirus_faecium	0.557592
Gemmiger_formicilis	Chicken_picornavirus_UCCPhV	0.514286
Gemmiger_formicilis	Chicken_microvirus_mg6_154	-0.568161
Gemmiger_formicilis	Beihai_blue_swimmer_crab_virus_2	0.510871
Gemmiger_formicilis	Grey_teal_picobirnavirus_y	-0.511702
Gemmiger_formicilis	Caudoviricetes_sp.	0.511471
Gemmiger_formicilis	Bacteriophage_sp.	0.588856
Gemmiger_formicilis	Termite_gut_associated_microvirus_1	0.658873
Gemmiger_formicilis	Chicken_virus_mg5_2676	0.573681
Gemmiger_formicilis	Chicken_proventriculitis_virus	-0.607172
Bacteroides_uniformis	Alistipes_shahii	0.810526
Bacteroides_uniformis	Bacteroides_coprocola	0.744361
Bacteroides_uniformis	Desulfovibrio_simplex	0.762406
Bacteroides_uniformis	Elusimicrobium_minutum	0.780451
Bacteroides_uniformis	Coprobacter_fastidiosus	0.890226
Bacteroides_uniformis	Campylobacter_jejuni	0.859722
Bacteroides_uniformis	Anaerotruncus_colihominis	0.828571
Bacteroides_uniformis	Helicobacter_pullorum	0.761188
Bacteroides_uniformis	Alistipes_finegoldii	0.57594
Bacteroides_uniformis	Clostridium_methylpentosum	0.723308
Bacteroides_uniformis	Acetanaerobacterium_elongatum	0.768421
Bacteroides_uniformis	Barnesiella_intestinihominis	0.606928
Bacteroides_uniformis	Hydrogenoanaerobacterium_saccharovorans	0.765414
Bacteroides_uniformis	Alistipes_timonensis	0.69359
Bacteroides_uniformis	Alistipes_indistinctus	0.582174
Bacteroides_uniformis	Alistipes_onderdonkii	0.832426
Bacteroides_uniformis	Bilophila_wadsworthia	0.613388
Bacteroides_uniformis	Clostridium_viride	0.550906
Bacteroides_uniformis	Gallibacterium_anatis	0.6246
Bacteroides_uniformis	Oscillibacter_valericigenes	0.517324
Bacteroides_uniformis	Comamonas_kerstersii	0.518102
Bacteroides_uniformis	Nacovirus_A	0.569713
Bacteroides_uniformis	Megrivirus_C	0.661654
Bacteroides_uniformis	Caliciviridae_sp.	0.50242
Bacteroides_uniformis	Melegrivirus_A	0.570956
Bacteroides_uniformis	Goose_calicivirus	0.562868
Bacteroides_uniformis	Picobirnavirus_Equ2	0.507644
Bacteroides_uniformis	Tortoise_microvirus_13	0.512545
Bacteroides_uniformis	Chicken_microvirus_mg7_7	-0.646897
Alistipes_shahii	Bacteroides_coprocola	0.803008
Alistipes_shahii	Desulfovibrio_simplex	0.67218
Alistipes_shahii	Elusimicrobium_minutum	0.753383
Alistipes_shahii	Coprobacter_fastidiosus	0.813534
Alistipes_shahii	Campylobacter_jejuni	0.799549
Alistipes_shahii	Anaerotruncus_colihominis	0.765414
Alistipes_shahii	Helicobacter_pullorum	0.708537
Alistipes_shahii	Alistipes_finegoldii	0.816541
Alistipes_shahii	Clostridium_methylpentosum	0.676692
Alistipes_shahii	Acetanaerobacterium_elongatum	0.754887
Alistipes_shahii	Barnesiella_intestinihominis	0.832832
Alistipes_shahii	Hydrogenoanaerobacterium_saccharovorans	0.622556
Alistipes_shahii	Alistipes_timonensis	0.821138
Alistipes_shahii	Alistipes_indistinctus	0.84167
Alistipes_shahii	Alistipes_onderdonkii	0.91283
Alistipes_shahii	Bilophila_wadsworthia	0.729208
Alistipes_shahii	Clostridium_viride	0.542524
Alistipes_shahii	Catabacter_hongkongensis	-0.518689
Alistipes_shahii	Oscillibacter_valericigenes	0.535608
Alistipes_shahii	Megrivirus_C	0.700752
Alistipes_shahii	Melegrivirus_A	0.619895
Alistipes_shahii	Rabbit_picobirnavirus_3	-0.53332
Alistipes_shahii	Chicken_microvirus_mg7_7	-0.663358
Alistipes_shahii	Rabbit_picobirnavirus_6	-0.537608
Alistipes_shahii	Macaque_picobirnavirus_20	-0.65233
Bacteroides_coprocola	Desulfovibrio_simplex	0.8
Bacteroides_coprocola	Elusimicrobium_minutum	0.869173
Bacteroides_coprocola	Coprobacter_fastidiosus	0.777444
Bacteroides_coprocola	Campylobacter_jejuni	0.707033
Bacteroides_coprocola	Anaerotruncus_colihominis	0.83609
Bacteroides_coprocola	Helicobacter_pullorum	0.831892
Bacteroides_coprocola	Alistipes_finegoldii	0.514286
Bacteroides_coprocola	Clostridium_methylpentosum	0.66015
Bacteroides_coprocola	Acetanaerobacterium_elongatum	0.86015
Bacteroides_coprocola	Barnesiella_intestinihominis	0.781627
Bacteroides_coprocola	Hydrogenoanaerobacterium_saccharovorans	0.675188
Bacteroides_coprocola	Alistipes_timonensis	0.771326
Bacteroides_coprocola	Alistipes_indistinctus	0.746145
Bacteroides_coprocola	Adlercreutzia_equolifaciens	-0.656627
Bacteroides_coprocola	Alistipes_onderdonkii	0.815083
Bacteroides_coprocola	Bilophila_wadsworthia	0.520427
Bacteroides_coprocola	Gallibacterium_anatis	0.607627
Bacteroides_coprocola	Picobirnavirus_sp.	-0.526316
Bacteroides_coprocola	Picobirnavirus_GIPBVturkeyUSAMN-12011	-0.55466
Bacteroides_coprocola	Melegrivirus_A	0.536776
Bacteroides_coprocola	Caudoviricetes_sp.	-0.581422
Bacteroides_coprocola	Chicken_microvirus_mg7_7	-0.518505
Bacteroides_coprocola	Rabbit_picobirnavirus_6	-0.618013
Desulfovibrio_simplex	Elusimicrobium_minutum	0.819549
Desulfovibrio_simplex	Coprobacter_fastidiosus	0.795489
Desulfovibrio_simplex	Campylobacter_jejuni	0.66416
Desulfovibrio_simplex	Anaerotruncus_colihominis	0.806015
Desulfovibrio_simplex	Helicobacter_pullorum	0.804062
Desulfovibrio_simplex	Clostridium_methylpentosum	0.795489
Desulfovibrio_simplex	Acetanaerobacterium_elongatum	0.902256
Desulfovibrio_simplex	Barnesiella_intestinihominis	0.629519
Desulfovibrio_simplex	Hydrogenoanaerobacterium_saccharovorans	0.771429
Desulfovibrio_simplex	Alistipes_timonensis	0.593212
Desulfovibrio_simplex	Alistipes_indistinctus	0.61903
Desulfovibrio_simplex	Adlercreutzia_equolifaciens	-0.518073
Desulfovibrio_simplex	Alistipes_onderdonkii	0.71576
Desulfovibrio_simplex	Bilophila_wadsworthia	0.723874
Desulfovibrio_simplex	Gallibacterium_anatis	0.695885
Desulfovibrio_simplex	Bavaria_virus	-0.578947
Desulfovibrio_simplex	Calicivirus_chickenV0021Bayern2004	-0.616773
Desulfovibrio_simplex	Calicivirus_chickenV0027Bayern2004	-0.696013
Desulfovibrio_simplex	Gervais_tombus-like_virus	-0.542281
Desulfovibrio_simplex	Chicken_microvirus_mg7_7	-0.567887
Escherichia	Lactobacillus_aviarius	0.62406
Escherichia	Faecalicoccus_acidiformans	0.559398
Escherichia	Lactobacillus_salivarius	0.532331
Escherichia	Blautia_glucerasea	0.631579
Escherichia	Clostridium_polysaccharolyticum	-0.694737
Escherichia	Coprococcus_comes	0.515789
Escherichia	Enterococcus_cecorum	0.556391
Escherichia	Hydrogenoanaerobacterium_saccharovorans	-0.557895
Escherichia	Lactobacillus_equi	0.532834
Escherichia	Anaerofustis_stercorihominis	0.522285
Escherichia	Enterorhabdus_caecimuris	0.580779
Escherichia	Qubevirus_faecium	0.525773
Escherichia	Husavirus_sp.	-0.779498
Escherichia	Dickeya_phage_phiDP23.1	0.533835
Escherichia	Jingmen_picorna-like_virus	-0.551205
Escherichia	Posavirus_12	-0.786132
Escherichia	Macaque_picobirnavirus_2	-0.578117
Escherichia	Tundra_vole_stool-associated_circular_virus	-0.512046
Escherichia	Otarine_picobirnavirus	-0.514286
Escherichia	Microviridae_phi-CA82	-0.50456
Escherichia	Dicistroviridae_sp.	-0.643958
Escherichia	Rabbit_picobirnavirus_7	-0.641083
Escherichia	Picornavirales_Bu-3	-0.73046
Escherichia	Picobirnavirus_PREDICT_PbV-38	0.584993
Escherichia	Chicken_virus_mg6_2056	-0.557574
Escherichia	Jingmen_picobirna-like_virus_1	-0.788721
Escherichia	Wuhan_arthropod_virus_2	-0.534583
Elusimicrobium_minutum	Coprobacter_fastidiosus	0.827068
Elusimicrobium_minutum	Campylobacter_jejuni	0.639338
Elusimicrobium_minutum	Anaerotruncus_colihominis	0.801504
Elusimicrobium_minutum	Helicobacter_pullorum	0.789018
Elusimicrobium_minutum	Alistipes_finegoldii	0.590977
Elusimicrobium_minutum	Clostridium_methylpentosum	0.694737
Elusimicrobium_minutum	Acetanaerobacterium_elongatum	0.864662
Elusimicrobium_minutum	Barnesiella_intestinihominis	0.79217
Elusimicrobium_minutum	Hydrogenoanaerobacterium_saccharovorans	0.754887
Elusimicrobium_minutum	Alistipes_timonensis	0.745666
Elusimicrobium_minutum	Alistipes_indistinctus	0.698007
Elusimicrobium_minutum	Adlercreutzia_equolifaciens	-0.560242
Elusimicrobium_minutum	Alistipes_onderdonkii	0.775669
Elusimicrobium_minutum	Bilophila_wadsworthia	0.599672
Elusimicrobium_minutum	Clostridium_viride	0.613388
Elusimicrobium_minutum	Gallibacterium_anatis	0.668729
Elusimicrobium_minutum	Melegrivirus_A	0.612904
Elusimicrobium_minutum	Caudoviricetes_sp.	-0.543061
Elusimicrobium_minutum	Picornavirales_sp.	0.502045
Elusimicrobium_minutum	Chicken_microvirus_mg7_7	-0.646897
Coprobacter_fastidiosus	Campylobacter_jejuni	0.785258
Coprobacter_fastidiosus	Anaerotruncus_colihominis	0.786466
Coprobacter_fastidiosus	Helicobacter_pullorum	0.71305
Coprobacter_fastidiosus	Alistipes_finegoldii	0.663158
Coprobacter_fastidiosus	Clostridium_methylpentosum	0.807519
Coprobacter_fastidiosus	Acetanaerobacterium_elongatum	0.792481
Coprobacter_fastidiosus	Barnesiella_intestinihominis	0.667169
Coprobacter_fastidiosus	Hydrogenoanaerobacterium_saccharovorans	0.783459
Coprobacter_fastidiosus	Alistipes_timonensis	0.792458
Coprobacter_fastidiosus	Alistipes_indistinctus	0.698007
Coprobacter_fastidiosus	Alistipes_onderdonkii	0.805624
Coprobacter_fastidiosus	Bilophila_wadsworthia	0.622532
Coprobacter_fastidiosus	Clostridium_viride	0.653772
Coprobacter_fastidiosus	Gallibacterium_anatis	0.555011
Coprobacter_fastidiosus	Butyricimonas_synergistica	0.505556
Coprobacter_fastidiosus	Bavaria_virus	-0.574436
Coprobacter_fastidiosus	Megrivirus_C	0.572932
Coprobacter_fastidiosus	Chicken_picornavirus_4	0.524595
Coprobacter_fastidiosus	Calicivirus_chickenV0027Bayern2004	-0.530077
Coprobacter_fastidiosus	Melegrivirus_A	0.588822
Coprobacter_fastidiosus	Picornavirales_sp.	0.515213
Coprobacter_fastidiosus	Tortoise_microvirus_13	0.596898
Coprobacter_fastidiosus	Chicken_microvirus_mg7_7	-0.6041
Coprobacter_fastidiosus	Macaque_picobirnavirus_20	-0.527005
Megamonas_funiformis	Catabacter_hongkongensis	-0.581752
Megamonas_funiformis	Aestuariispira_insulae	-0.549096
Megamonas_funiformis	Oscillibacter_valericigenes	0.523777
Megamonas_funiformis	Avisivirus_B	0.502256
Megamonas_funiformis	Tundra_vole_stool-associated_circular_virus	0.587481
Megamonas_funiformis	Chicken_virus_mg8_324	-0.546488
Megamonas_funiformis	Kumba_picobirna-like_virus	-0.52782
Megamonas_funiformis	Chicken_virus_mg8_273	-0.577076
Megamonas_funiformis	Bacillus_phage_vB_BceM-HSE3	0.524996
Lactobacillus_aviarius	Lactobacillus_salivarius	0.756391
Lactobacillus_aviarius	Blautia_glucerasea	0.663158
Lactobacillus_aviarius	Coprococcus_comes	0.67218
Lactobacillus_aviarius	Enterococcus_cecorum	0.569925
Lactobacillus_aviarius	Lactobacillus_equi	0.647552
Lactobacillus_aviarius	Lactobacillus_ingluviei	0.576813
Lactobacillus_aviarius	Clostridium_amygdalinum	0.516736
Lactobacillus_aviarius	Lactobacillus_coleohominis	0.660066
Lactobacillus_aviarius	Anaerofustis_stercorihominis	0.591099
Lactobacillus_aviarius	Enterorhabdus_caecimuris	0.672198
Lactobacillus_aviarius	Camula_virus	0.673684
Lactobacillus_aviarius	Husavirus_sp.	-0.508236
Lactobacillus_aviarius	Circular_ssDNA_virus_sp.	-0.503957
Lactobacillus_aviarius	Posavirus_12	-0.55775
Lactobacillus_aviarius	Leviviridae_sp.	0.530318
Lactobacillus_aviarius	Chimpanzee_faeces_associated_circular_DNA_virus_1	-0.559269
Lactobacillus_aviarius	Dicistroviridae_sp.	-0.524257
Lactobacillus_aviarius	Chicken_stool_associated_circular_virus_1	0.631547
Lactobacillus_aviarius	Chicken_microvirus_mg6_154	0.524049
Lactobacillus_aviarius	Gokushovirinae_environmental_samples	0.53332
Lactobacillus_aviarius	Rabbit_picobirnavirus_7	-0.584847
Lactobacillus_aviarius	Thornevirus_SP15	-0.526041
Lactobacillus_aviarius	Jingmen_picobirna-like_virus_1	-0.580512
Lactobacillus_aviarius	Chicken_microvirus_mg8_48	0.549589
Lactobacillus_aviarius	Alces_alces_faeces_associated_microvirus_MP21_4718	-0.502267
Campylobacter_jejuni	Anaerotruncus_colihominis	0.843174
Campylobacter_jejuni	Helicobacter_pullorum	0.639955
Campylobacter_jejuni	Alistipes_finegoldii	0.610004
Campylobacter_jejuni	Clostridium_methylpentosum	0.68522
Campylobacter_jejuni	Acetanaerobacterium_elongatum	0.698759
Campylobacter_jejuni	Barnesiella_intestinihominis	0.653108
Campylobacter_jejuni	Hydrogenoanaerobacterium_saccharovorans	0.594961
Campylobacter_jejuni	Alistipes_timonensis	0.571917
Campylobacter_jejuni	Alistipes_indistinctus	0.595184
Campylobacter_jejuni	Alistipes_onderdonkii	0.763344
Campylobacter_jejuni	Gallibacterium_anatis	0.631626
Campylobacter_jejuni	Catabacter_hongkongensis	-0.536233
Campylobacter_jejuni	Oscillibacter_valericigenes	0.507835
Campylobacter_jejuni	Nacovirus_A	0.58357
Campylobacter_jejuni	Megrivirus_C	0.578413
Campylobacter_jejuni	Goose_calicivirus	0.540133
Campylobacter_jejuni	Chicken_microvirus_mg7_7	-0.53352
Clostridium_leptum	Clostridium_polysaccharolyticum	0.542857
Clostridium_leptum	Holdemania_filiformis	0.505263
Clostridium_leptum	Christensenella_minuta	0.502256
Clostridium_leptum	Enterorhabdus_caecimuris	-0.656066
Clostridium_leptum	Avisivirus_Pf-CHK1AsV	-0.506767
Clostridium_leptum	Rabbit_picobirnavirus_5	-0.530333
Clostridium_leptum	Picobirnavirus_PREDICT_PbV-43	-0.539929
Clostridium_leptum	Odonata-associated_circular_virus-17	0.500116
Clostridium_leptum	Posa-like_virus	-0.505337
Anaerotruncus_colihominis	Helicobacter_pullorum	0.776232
Anaerotruncus_colihominis	Clostridium_methylpentosum	0.804511
Anaerotruncus_colihominis	Acetanaerobacterium_elongatum	0.929323
Anaerotruncus_colihominis	Barnesiella_intestinihominis	0.715362
Anaerotruncus_colihominis	Hydrogenoanaerobacterium_saccharovorans	0.846617
Anaerotruncus_colihominis	Alistipes_timonensis	0.632457
Anaerotruncus_colihominis	Alistipes_indistinctus	0.682211
Anaerotruncus_colihominis	Alistipes_onderdonkii	0.827696
Anaerotruncus_colihominis	Bilophila_wadsworthia	0.578337
Anaerotruncus_colihominis	Gallibacterium_anatis	0.629692
Anaerotruncus_colihominis	Oscillibacter_valericigenes	0.511946
Anaerotruncus_colihominis	Bavaria_virus	-0.618045
Anaerotruncus_colihominis	Megrivirus_C	0.520301
Anaerotruncus_colihominis	Shelduck_picobirnavirus_I	-0.533835
Anaerotruncus_colihominis	Calicivirus_chickenV0027Bayern2004	-0.543905
Anaerotruncus_colihominis	Beihai_blue_swimmer_crab_virus_2	-0.542061
Anaerotruncus_colihominis	Melegrivirus_A	0.566295
Anaerotruncus_colihominis	Goose_calicivirus	0.626389
Anaerotruncus_colihominis	Chicken_microvirus_mg7_7	-0.582701
Faecalicoccus_acidiformans	Blautia_glucerasea	0.750376
Faecalicoccus_acidiformans	Sicinivirus_A	-0.506767
Faecalicoccus_acidiformans	Marmot_picobirnavirus	-0.654135
Faecalicoccus_acidiformans	Sicinivirus_UCC1	-0.572932
Faecalicoccus_acidiformans	Orthopicobirnavirus_hominis	-0.586466
Faecalicoccus_acidiformans	Dromedary_picobirnavirus	-0.524812
Faecalicoccus_acidiformans	Rabbit_picobirnavirus_7	-0.580831
Faecalicoccus_acidiformans	Macaque_picobirnavirus_12	-0.511639
Faecalicoccus_acidiformans	Rabbit_picobirnavirus_3	-0.707801
Helicobacter_pullorum	Clostridium_methylpentosum	0.75818
Helicobacter_pullorum	Acetanaerobacterium_elongatum	0.819105
Helicobacter_pullorum	Barnesiella_intestinihominis	0.597364
Helicobacter_pullorum	Hydrogenoanaerobacterium_saccharovorans	0.721324
Helicobacter_pullorum	Alistipes_timonensis	0.753496
Helicobacter_pullorum	Alistipes_indistinctus	0.607223
Helicobacter_pullorum	Alistipes_onderdonkii	0.791733
Helicobacter_pullorum	Bilophila_wadsworthia	0.631151
Helicobacter_pullorum	Gallibacterium_anatis	0.528902
Helicobacter_pullorum	Aestuariispira_insulae	0.510585
Helicobacter_pullorum	Posavirus_1	0.511471
Helicobacter_pullorum	Picobirnavirus_GIPBVturkeyUSAMN-12011	-0.521054
Helicobacter_pullorum	Picornavirales_sp.	0.527757
Helicobacter_pullorum	Chicken_microvirus_mg7_7	-0.693247
Helicobacter_pullorum	Macaque_picobirnavirus_36	-0.60021
Alistipes_finegoldii	Barnesiella_intestinihominis	0.706326
Alistipes_finegoldii	Alistipes_timonensis	0.699628
Alistipes_finegoldii	Lawsonia_intracellularis	0.592864
Alistipes_finegoldii	Alistipes_indistinctus	0.72358
Alistipes_finegoldii	Alistipes_onderdonkii	0.679499
Alistipes_finegoldii	Bilophila_wadsworthia	0.50976
Alistipes_finegoldii	Clostridium_viride	0.594339
Alistipes_finegoldii	Anaeroplasma_abactoclasticum	0.520988
Alistipes_finegoldii	Beihai_tombus-like_virus_15	-0.581955
Alistipes_finegoldii	Chicken_virus_mg4_657	0.547174
Alistipes_finegoldii	Chicken_microvirus_mg7_10	0.517293
Alistipes_finegoldii	Chicken_microvirus_mg4_115	0.544361
Alistipes_finegoldii	Nacovirus_A	0.506075
Alistipes_finegoldii	Pythium_polare_bunya-like_RNA_virus_1	-0.596591
Alistipes_finegoldii	Megrivirus_C	0.693233
Alistipes_finegoldii	Sicinivirus_10	0.548872
Alistipes_finegoldii	Chicken_picornavirus_HK-2014	0.568421
Alistipes_finegoldii	Chicken_microvirus_mg6_154	-0.561103
Alistipes_finegoldii	Melegrivirus_A	0.502596
Alistipes_finegoldii	Chicken_microvirus_mg7_7	-0.54978
Alistipes_finegoldii	UR2_sarcoma_virus	0.553072
Alistipes_finegoldii	Macaque_picobirnavirus_20	-0.527005
Alistipes_finegoldii	Alces_alces_faeces_associated_microvirus_MP21_4718	0.504418
Lactobacillus_salivarius	Blautia_glucerasea	0.571429
Lactobacillus_salivarius	Coprococcus_comes	0.696241
Lactobacillus_salivarius	Enterococcus_cecorum	0.772932
Lactobacillus_salivarius	Faecalitalea_cylindroides	0.522591
Lactobacillus_salivarius	Lactobacillus_equi	0.864157
Lactobacillus_salivarius	Lactobacillus_ingluviei	0.848075
Lactobacillus_salivarius	Clostridium_amygdalinum	0.578413
Lactobacillus_salivarius	Lactobacillus_coleohominis	0.722615
Lactobacillus_salivarius	Lactobacillus_saerimneri	0.668834
Lactobacillus_salivarius	Anaerofustis_stercorihominis	0.564632
Lactobacillus_salivarius	Enterorhabdus_caecimuris	0.525928
Lactobacillus_salivarius	Chimpanzee_faeces_associated_circular_DNA_virus_1	-0.517785
Lactobacillus_salivarius	Dicistroviridae_sp.	-0.596987
Lactobacillus_salivarius	Kristianstad_virus	-0.501547
Lactobacillus_salivarius	Chicken_stool_associated_circular_virus_1	0.605912
Lactobacillus_salivarius	Thornevirus_SP15	-0.532079
Lactobacillus_salivarius	Caudoviricetes_sp.	-0.696502
Blautia_glucerasea	Coprococcus_comes	0.603008
Blautia_glucerasea	Faecalitalea_cylindroides	0.507531
Blautia_glucerasea	Lactobacillus_ingluviei	0.534905
Blautia_glucerasea	Clostridium_amygdalinum	0.565626
Blautia_glucerasea	Lactobacillus_saerimneri	0.568625
Blautia_glucerasea	Husavirus_sp.	-0.61796
Blautia_glucerasea	Marmot_picobirnavirus	-0.610526
Blautia_glucerasea	Jingmen_picorna-like_virus	-0.500001
Blautia_glucerasea	Posavirus_12	-0.638538
Blautia_glucerasea	Tundra_vole_stool-associated_circular_virus	-0.678156
Blautia_glucerasea	Dicistroviridae_sp.	-0.590926
Blautia_glucerasea	Chicken_stool_associated_circular_virus_1	0.620672
Blautia_glucerasea	Rabbit_picobirnavirus_7	-0.710172
Blautia_glucerasea	Porcine_serum_associated_circular_DNA_virus_2	-0.643774
Blautia_glucerasea	Porcine_associated_porprismacovirus	0.520988
Blautia_glucerasea	Chicken_smacovirus_mg5_1444	0.520988
Blautia_glucerasea	Chicken_microvirus_mg8_48	0.608743
Clostridium_polysaccharolyticum	Enterococcus_cecorum	-0.532331
Clostridium_polysaccharolyticum	Adlercreutzia_equolifaciens	0.804218
Clostridium_polysaccharolyticum	Lactobacillus_saerimneri	-0.544544
Clostridium_polysaccharolyticum	Anaerofustis_stercorihominis	-0.562868
Clostridium_polysaccharolyticum	Enterorhabdus_caecimuris	-0.67435
Clostridium_polysaccharolyticum	Husavirus_sp.	0.613388
Clostridium_polysaccharolyticum	Posavirus_12	0.515802
Clostridium_polysaccharolyticum	Macaque_picobirnavirus_2	0.556985
Clostridium_polysaccharolyticum	Pink-eared_duck_picobirnavirus	0.592481
Clostridium_polysaccharolyticum	Otarine_picobirnavirus	0.61203
Clostridium_polysaccharolyticum	Microviridae_phi-CA82	0.606078
Clostridium_polysaccharolyticum	Dicistroviridae_sp.	0.606078
Clostridium_polysaccharolyticum	Nauglamirvirus_anduin	0.524097
Clostridium_polysaccharolyticum	Chicken_microvirus_mg6_154	-0.545223
Clostridium_polysaccharolyticum	Chicken_stool_associated_circular_virus_2	-0.594364
Clostridium_polysaccharolyticum	Grey_teal_picobirnavirus_X	-0.525009
Clostridium_polysaccharolyticum	Picornavirales_Bu-3	0.519109
Clostridium_polysaccharolyticum	Thornevirus_SP15	0.589438
Clostridium_polysaccharolyticum	Murine_picobirnavirus_2	0.552281
Clostridium_polysaccharolyticum	Picobirnavirus_turkeyMD-2010	0.510275
Clostridium_polysaccharolyticum	Picobirnavirus_PREDICT_PbV-83	0.554334
Clostridium_polysaccharolyticum	Chicken_virus_mg6_2056	0.531107
Clostridium_polysaccharolyticum	Chicken_microvirus_mg8_48	-0.527004
Clostridium_methylpentosum	Acetanaerobacterium_elongatum	0.774436
Clostridium_methylpentosum	Barnesiella_intestinihominis	0.60994
Clostridium_methylpentosum	Hydrogenoanaerobacterium_saccharovorans	0.745865
Clostridium_methylpentosum	Alistipes_timonensis	0.714722
Clostridium_methylpentosum	Alistipes_indistinctus	0.66416
Clostridium_methylpentosum	Alistipes_onderdonkii	0.67004
Clostridium_methylpentosum	Bilophila_wadsworthia	0.736065
Clostridium_methylpentosum	Butyricimonas_synergistica	0.546677
Clostridium_methylpentosum	Aestuariispira_insulae	0.599894
Clostridium_methylpentosum	Microviridae_sp.	0.550376
Clostridium_methylpentosum	Calicivirus_chickenV0021Bayern2004	-0.511471
Clostridium_methylpentosum	Calicivirus_chickenV0027Bayern2004	-0.525467
Clostridium_methylpentosum	Chicken_microvirus_mg7_7	-0.637021
Coprococcus_comes	Enterococcus_cecorum	0.556391
Coprococcus_comes	Faecalitalea_cylindroides	0.748495
Coprococcus_comes	Lactobacillus_equi	0.731326
Coprococcus_comes	Holdemania_filiformis	0.592481
Coprococcus_comes	Lactobacillus_ingluviei	0.658344
Coprococcus_comes	Lactobacillus_coleohominis	0.567887
Coprococcus_comes	Husavirus_sp.	-0.608054
Coprococcus_comes	Circular_ssDNA_virus_sp.	-0.643774
Coprococcus_comes	Jingmen_picorna-like_virus	-0.658133
Coprococcus_comes	Posavirus_12	-0.637762
Coprococcus_comes	Chimpanzee_faeces_associated_circular_DNA_virus_1	-0.531613
Coprococcus_comes	Chicken_stool-associated_circular_virus	-0.531302
Coprococcus_comes	Chicken_stool_associated_circular_virus_1	0.563965
Coprococcus_comes	Phacovirus_TRPhV	0.573589
Coprococcus_comes	Rabbit_picobirnavirus_7	-0.548696
Coprococcus_comes	Chicken_microvirus_mg8_102	0.539904
Coprococcus_comes	Jingmen_picobirna-like_virus_1	-0.596393
Coprococcus_comes	Wuhan_arthropod_virus_2	-0.515231
Eubacterium_coprostanoligenes	Anaerovorax_odorimutans	0.597214
Eubacterium_coprostanoligenes	Holdemania_filiformis	0.553046
Eubacterium_coprostanoligenes	Christensenella_minuta	0.756082
Eubacterium_coprostanoligenes	Olsenella_scatoligenes	0.821746
Eubacterium_coprostanoligenes	Faecalicoccus_pleomorphus	0.664095
Eubacterium_coprostanoligenes	Qubevirus_faecium	0.603053
Eubacterium_coprostanoligenes	Beihai_tombus-like_virus_15	-0.645473
Eubacterium_coprostanoligenes	Chicken_astrovirus	0.539409
Eubacterium_coprostanoligenes	Chicken_virus_mg4_657	0.534605
Eubacterium_coprostanoligenes	Chicken_picornavirus_UCCPhV	0.530318
Eubacterium_coprostanoligenes	Cressdnaviricota_sp.	0.651534
Eubacterium_coprostanoligenes	Chicken_microvirus_mg4_115	0.628806
Eubacterium_coprostanoligenes	Pink-eared_duck_picobirnavirus	0.560622
Eubacterium_coprostanoligenes	Pythium_polare_bunya-like_RNA_virus_1	-0.543206
Eubacterium_coprostanoligenes	Chicken_virus_mg5_2197	0.534108
Eubacterium_coprostanoligenes	Nauglamirvirus_anduin	0.55995
Eubacterium_coprostanoligenes	Chicken_microvirus_mg6_154	-0.570704
Eubacterium_coprostanoligenes	Jingmen_tombus-like_virus_2	0.517367
Eubacterium_coprostanoligenes	Dependoparvovirus_avian1	0.660109
Eubacterium_coprostanoligenes	Picobirnavirus_PREDICT_PbV-43	-0.508478
Eubacterium_coprostanoligenes	Caudoviricetes_sp.	0.545675
Eubacterium_coprostanoligenes	Lysoka_picobirna-like_virus	-0.531462
Eubacterium_coprostanoligenes	Bacteriophage_sp.	0.600922
Eubacterium_coprostanoligenes	Termite_gut_associated_microvirus_1	0.648674
Acetanaerobacterium_elongatum	Barnesiella_intestinihominis	0.722892
Acetanaerobacterium_elongatum	Hydrogenoanaerobacterium_saccharovorans	0.866165
Acetanaerobacterium_elongatum	Alistipes_timonensis	0.677741
Acetanaerobacterium_elongatum	Alistipes_indistinctus	0.739376
Acetanaerobacterium_elongatum	Alistipes_onderdonkii	0.835579
Acetanaerobacterium_elongatum	Bilophila_wadsworthia	0.684251
Acetanaerobacterium_elongatum	Gallibacterium_anatis	0.657697
Acetanaerobacterium_elongatum	Bavaria_virus	-0.625564
Acetanaerobacterium_elongatum	Calicivirus_chickenV0021Bayern2004	-0.561113
Acetanaerobacterium_elongatum	Chicken_picornavirus_4	0.504511
Acetanaerobacterium_elongatum	Calicivirus_chickenV0027Bayern2004	-0.699086
Acetanaerobacterium_elongatum	Melegrivirus_A	0.616788
Acetanaerobacterium_elongatum	Chicken_microvirus_mg7_7	-0.590931
Acetanaerobacterium_elongatum	Macaque_picobirnavirus_36	-0.508629
Enterococcus_cecorum	Faecalitalea_cylindroides	0.509037
Enterococcus_cecorum	Lactobacillus_equi	0.840006
Enterococcus_cecorum	Lactobacillus_ingluviei	0.649963
Enterococcus_cecorum	Dickeya_phage_phiDP23.1	0.511278
Enterococcus_cecorum	Leviviridae_sp.	0.619715
Enterococcus_cecorum	Chimpanzee_faeces_associated_circular_DNA_virus_1	-0.508566
Enterococcus_cecorum	Kristianstad_virus	-0.700977
Enterococcus_cecorum	Kumba_picobirna-like_virus	-0.55188
Enterococcus_cecorum	Chimpanzee_faeces_associated_microphage_2	-0.539056
Enterococcus_cecorum	Picornavirales_Bu-3	-0.582143
Enterococcus_cecorum	Picobirnavirus_dogKNA2015	-0.54155
Enterococcus_cecorum	Chicken_virus_mg6_2056	-0.55581
Barnesiella_intestinihominis	Hydrogenoanaerobacterium_saccharovorans	0.516567
Barnesiella_intestinihominis	Alistipes_timonensis	0.710508
Barnesiella_intestinihominis	Alistipes_indistinctus	0.864031
Barnesiella_intestinihominis	Alistipes_onderdonkii	0.765786
Barnesiella_intestinihominis	Clostridium_amygdalinum	0.551413
Barnesiella_intestinihominis	Bilophila_wadsworthia	0.586077
Barnesiella_intestinihominis	Clostridium_viride	0.587603
Barnesiella_intestinihominis	Aestuariispira_insulae	0.532966
Barnesiella_intestinihominis	Megrivirus_C	0.57229
Barnesiella_intestinihominis	Melegrivirus_A	0.661284
Barnesiella_intestinihominis	Rabbit_picobirnavirus_3	-0.619847
Barnesiella_intestinihominis	Lysoka_picobirna-like_virus	-0.539387
Barnesiella_intestinihominis	Chicken_microvirus_mg7_7	-0.669303
Hydrogenoanaerobacterium_saccharovorans	Alistipes_timonensis	0.613589
Hydrogenoanaerobacterium_saccharovorans	Alistipes_onderdonkii	0.758327
Hydrogenoanaerobacterium_saccharovorans	Bilophila_wadsworthia	0.592053
Hydrogenoanaerobacterium_saccharovorans	Posavirus_1	0.562406
Hydrogenoanaerobacterium_saccharovorans	Bavaria_virus	-0.6
Hydrogenoanaerobacterium_saccharovorans	Chicken_astrovirus	-0.500752
Hydrogenoanaerobacterium_saccharovorans	Picornavirales_Tottori-HG1	0.530827
Hydrogenoanaerobacterium_saccharovorans	Picornavirales_Tottori-HG2	0.505263
Hydrogenoanaerobacterium_saccharovorans	Calicivirus_chickenV0027Bayern2004	-0.645311
Hydrogenoanaerobacterium_saccharovorans	Gervais_tombus-like_virus	-0.504093
Hydrogenoanaerobacterium_saccharovorans	Melegrivirus_A	0.566295
Hydrogenoanaerobacterium_saccharovorans	Chicken_microvirus_mg7_7	-0.585993
Faecalitalea_cylindroides	Lactobacillus_equi	0.58428
Faecalitalea_cylindroides	Lactobacillus_ingluviei	0.534948
Faecalitalea_cylindroides	Lactobacillus_coleohominis	0.570391
Faecalitalea_cylindroides	Lactobacillus_saerimneri	0.60527
Faecalitalea_cylindroides	Methanobrevibacter_woesei	0.529178
Faecalitalea_cylindroides	Sicinivirus_A	-0.585844
Faecalitalea_cylindroides	Sicinivirus_sp.	-0.531627
Faecalitalea_cylindroides	Chicken_picornavirus_1	-0.637049
Faecalitalea_cylindroides	Jingmen_picorna-like_virus	-0.577677
Faecalitalea_cylindroides	Chicken_stool_associated_circular_virus_1	0.532917
Faecalitalea_cylindroides	Protoparvovirus_HK-2014	0.507182
Faecalitalea_cylindroides	Macaque_picobirnavirus_12	-0.540108
Faecalitalea_cylindroides	Mischke_partiti-like_virus	-0.606991
Faecalitalea_cylindroides	Chicken_microvirus_mg8_102	0.583579
Lactobacillus_equi	Lactobacillus_ingluviei	0.78321
Lactobacillus_equi	Clostridium_amygdalinum	0.523219
Lactobacillus_equi	Lactobacillus_coleohominis	0.723695
Lactobacillus_equi	Lactobacillus_saerimneri	0.502937
Lactobacillus_equi	Husavirus_sp.	-0.547635
Lactobacillus_equi	Circular_ssDNA_virus_sp.	-0.587602
Lactobacillus_equi	Microviridae_sp.	-0.585665
Lactobacillus_equi	Posavirus_12	-0.517752
Lactobacillus_equi	Chimpanzee_faeces_associated_circular_DNA_virus_1	-0.690162
Lactobacillus_equi	Chicken_stool-associated_circular_virus	-0.539641
Lactobacillus_equi	Dicistroviridae_sp.	-0.549053
Lactobacillus_equi	Kristianstad_virus	-0.658054
Lactobacillus_equi	Chicken_stool_associated_circular_virus_1	0.577793
Lactobacillus_equi	Kumba_picobirna-like_virus	-0.552457
Lactobacillus_equi	Chimpanzee_faeces_associated_microphage_2	-0.545126
Lactobacillus_equi	Picornavirales_Bu-3	-0.522002
Lactobacillus_equi	Caudoviricetes_sp.	-0.64553
Lactobacillus_equi	Jingmen_picobirna-like_virus_1	-0.506548
Lactobacillus_equi	Wuhan_arthropod_virus_2	-0.582737
Alistipes_timonensis	Anaerovorax_odorimutans	0.517362
Alistipes_timonensis	Alistipes_indistinctus	0.756894
Alistipes_timonensis	Alistipes_onderdonkii	0.758029
Alistipes_timonensis	Bilophila_wadsworthia	0.655862
Alistipes_timonensis	Clostridium_viride	0.607294
Alistipes_timonensis	Butyricimonas_synergistica	0.568169
Alistipes_timonensis	Aestuariispira_insulae	0.621586
Alistipes_timonensis	Butyricimonas_virosa	0.510643
Alistipes_timonensis	Phacovirus_Pf-CHK1PhV	0.542645
Alistipes_timonensis	Megrivirus_C	0.635476
Alistipes_timonensis	Chicken_picornavirus_HK-2014	0.52906
Alistipes_timonensis	Kumba_picobirna-like_virus	0.535098
Alistipes_timonensis	Picobirnavirus_GIPBVturkeyUSAMN-12011	-0.516658
Alistipes_timonensis	Fisa-like_virus	0.530228
Alistipes_timonensis	Melegrivirus_A	0.674092
Alistipes_timonensis	Bovine_serum-associated_circular_virus	0.517179
Alistipes_timonensis	Picornavirales_sp.	0.594818
Alistipes_timonensis	Chicken_microvirus_mg7_7	-0.586557
Alistipes_timonensis	Rabbit_picobirnavirus_6	-0.526981
Alistipes_timonensis	Macaque_picobirnavirus_20	-0.580607
Lawsonia_intracellularis	Clostridium_saccharogumia	0.575219
Lawsonia_intracellularis	Clostridium_viride	0.522143
Lawsonia_intracellularis	Chicken_virus_mg4_657	0.570309
Lawsonia_intracellularis	Quail_picornavirus_QPV1HUN2010	0.64854
Lawsonia_intracellularis	Phacovirus_DMPhV	0.805019
Lawsonia_intracellularis	Termite_gut_associated_microvirus_1	0.58005
Lawsonia_intracellularis	UR2_sarcoma_virus	0.577499
Lawsonia_intracellularis	Prokaryotic_dsDNA_virus_sp.	0.541079
Anaerovorax_odorimutans	Holdemania_filiformis	0.596591
Anaerovorax_odorimutans	Christensenella_minuta	0.661066
Anaerovorax_odorimutans	Anaerorhabdus_furcosa	0.506481
Anaerovorax_odorimutans	Olsenella_scatoligenes	0.763676
Anaerovorax_odorimutans	Faecalicoccus_pleomorphus	0.511421
Anaerovorax_odorimutans	Aestuariispira_insulae	0.552308
Anaerovorax_odorimutans	Butyricimonas_virosa	0.532255
Anaerovorax_odorimutans	Enterorhabdus_caecimuris	-0.533366
Anaerovorax_odorimutans	Phacovirus_sp.	0.702237
Anaerovorax_odorimutans	Beihai_tombus-like_virus_15	-0.64786
Anaerovorax_odorimutans	Phacovirus_Pf-CHK1PhV	0.638538
Anaerovorax_odorimutans	Chicken_virus_mg4_657	0.603914
Anaerovorax_odorimutans	Camula_virus	-0.501043
Anaerovorax_odorimutans	Chicken_picornavirus_UCCPhV	0.518909
Anaerovorax_odorimutans	Cressdnaviricota_sp.	0.605912
Anaerovorax_odorimutans	Picobirnavirus_wolfPRT1892015	0.569402
Anaerovorax_odorimutans	Chicken_microvirus_mg4_115	0.500266
Anaerovorax_odorimutans	Pink-eared_duck_picobirnavirus	0.637762
Anaerovorax_odorimutans	Circoviridae_sp.	0.607354
Anaerovorax_odorimutans	Pythium_polare_bunya-like_RNA_virus_1	-0.758427
Anaerovorax_odorimutans	Chicken_picornavirus_HK-2014	0.50415
Anaerovorax_odorimutans	Fox_picobirnavirus	0.579719
Anaerovorax_odorimutans	Chicken_microvirus_mg6_154	-0.691822
Anaerovorax_odorimutans	Chicken_stool_associated_circular_virus_2	-0.525301
Anaerovorax_odorimutans	Kumba_picobirna-like_virus	0.50182
Anaerovorax_odorimutans	Dependoparvovirus_avian1	0.620729
Anaerovorax_odorimutans	Rabbit_picobirnavirus_5	-0.61011
Anaerovorax_odorimutans	Equine_infectious_anemia_virus	0.509737
Anaerovorax_odorimutans	Chicken_microvirus_mg8_48	-0.533366
Holdemania_filiformis	Christensenella_minuta	0.557895
Holdemania_filiformis	Anaerorhabdus_furcosa	0.590977
Holdemania_filiformis	Olsenella_scatoligenes	0.622902
Holdemania_filiformis	Faecalicoccus_pleomorphus	0.606245
Holdemania_filiformis	Phacovirus_sp.	0.759398
Holdemania_filiformis	Pythium_polare_bunya-like_RNA_virus_1	-0.501043
Holdemania_filiformis	Chicken_stool-associated_circular_virus	-0.61013
Holdemania_filiformis	Phacovirus_TRPhV	0.520758
Holdemania_filiformis	Dependoparvovirus_avian1	0.679818
Holdemania_filiformis	Halophytophthora_RNA_virus_7	0.558194
Holdemania_filiformis	Aveparvovirus_galliform1	-0.56155
Holdemania_filiformis	Posa-like_virus	-0.551426
Alistipes_indistinctus	Alistipes_onderdonkii	0.772018
Alistipes_indistinctus	Bilophila_wadsworthia	0.679173
Alistipes_indistinctus	Clostridium_viride	0.50271
Alistipes_indistinctus	Aestuariispira_insulae	0.549303
Alistipes_indistinctus	Chicken_picornavirus_1	-0.506958
Alistipes_indistinctus	Chicken_virus_mg4_657	0.505477
Alistipes_indistinctus	Chicken_picornavirus_5	0.527464
Alistipes_indistinctus	Pythium_polare_bunya-like_RNA_virus_1	-0.503563
Alistipes_indistinctus	Megrivirus_C	0.580669
Alistipes_indistinctus	Chicken_picornavirus_4	0.56819
Alistipes_indistinctus	Picobirnavirus_GIPBVturkeyUSAMN-12011	-0.528739
Alistipes_indistinctus	Melegrivirus_A	0.711826
Alistipes_indistinctus	Bovine_serum-associated_circular_virus	0.510585
Alistipes_indistinctus	Rabbit_picobirnavirus_3	-0.535167
Alistipes_indistinctus	Halophytophthora_RNA_virus_7	0.561631
Alistipes_indistinctus	Chicken_microvirus_mg7_7	-0.589507
Clostridium_saccharogumia	Christensenella_minuta	0.517293
Clostridium_saccharogumia	Otarine_picobirnavirus	0.709774
Clostridium_saccharogumia	Smacoviridae_sp.	0.524996
Clostridium_saccharogumia	Chicken_gallivirus_1	0.532079
Clostridium_saccharogumia	Merch_tombus-like_virus	0.723044
Clostridium_saccharogumia	Chicken_smacovirus_mg2_55	0.535794
Clostridium_saccharogumia	Quail_picornavirus_QPV1HUN2010	0.57601
Clostridium_saccharogumia	Odonata-associated_circular_virus-17	0.516248
Clostridium_saccharogumia	Macaque_picobirnavirus_25	-0.6692
Christensenella_minuta	Olsenella_scatoligenes	0.688248
Christensenella_minuta	Faecalicoccus_pleomorphus	0.614587
Christensenella_minuta	Phacovirus_sp.	0.505263
Christensenella_minuta	Beihai_tombus-like_virus_15	-0.547368
Christensenella_minuta	Chicken_virus_mg4_657	0.600004
Christensenella_minuta	Chicken_picornavirus_UCCPhV	0.538346
Christensenella_minuta	Picobirnavirus_wolfPRT1892015	0.58797
Christensenella_minuta	Chicken_microvirus_mg4_115	0.56391
Christensenella_minuta	Pink-eared_duck_picobirnavirus	0.619549
Christensenella_minuta	Pythium_polare_bunya-like_RNA_virus_1	-0.582608
Christensenella_minuta	Chicken_virus_mg5_2197	0.606899
Christensenella_minuta	Chicken_microvirus_mg6_154	-0.524049
Christensenella_minuta	Chicken_stool_associated_circular_virus_2	-0.529725
Christensenella_minuta	Dependoparvovirus_avian1	0.511921
Christensenella_minuta	Rabbit_picobirnavirus_5	-0.515855
Christensenella_minuta	Picobirnavirus_PREDICT_PbV-37	0.577617
Christensenella_minuta	Merch_tombus-like_virus	0.602537
Christensenella_minuta	Bacteriophage_sp.	0.534639
Christensenella_minuta	Chicken_microvirus_mg8_48	-0.50872
Christensenella_minuta	Termite_gut_associated_microvirus_1	0.534343
Christensenella_minuta	Chicken_microvirus_mg8_95	0.513567
Adlercreutzia_equolifaciens	Gallibacterium_anatis	-0.5329
Adlercreutzia_equolifaciens	Lactobacillus_saerimneri	-0.554701
Adlercreutzia_equolifaciens	Anaerofustis_stercorihominis	-0.54251
Adlercreutzia_equolifaciens	Pink-eared_duck_picobirnavirus	0.615965
Adlercreutzia_equolifaciens	Riboviria_sp.	-0.551205
Adlercreutzia_equolifaciens	Thornevirus_SP15	0.513229
Adlercreutzia_equolifaciens	Caudoviricetes_sp.	0.515255
Adlercreutzia_equolifaciens	Picobirnavirus_PREDICT_PbV-83	0.522676
Lactobacillus_ingluviei	Clostridium_amygdalinum	0.525197
Lactobacillus_ingluviei	Lactobacillus_coleohominis	0.645572
Lactobacillus_ingluviei	Lactobacillus_saerimneri	0.716387
Lactobacillus_ingluviei	Anaerofustis_stercorihominis	0.643738
Lactobacillus_ingluviei	Chicken_picornavirus_5	0.513
Lactobacillus_ingluviei	Avastrovirus_1	-0.591513
Lactobacillus_ingluviei	Smacoviridae_sp.	0.508077
Lactobacillus_ingluviei	Microviridae_phi-CA82	-0.506726
Lactobacillus_ingluviei	Dicistroviridae_sp.	-0.517475
Lactobacillus_ingluviei	Chicken_stool_associated_circular_virus_1	0.583737
Lactobacillus_ingluviei	Caudoviricetes_sp.	-0.648683
Lactobacillus_ingluviei	Chicken_smacovirus_mg2_55	0.523728
Lactobacillus_ingluviei	Wuhan_arthropod_virus_2	-0.514793
Lactobacillus_ingluviei	uncultured_marine_virus	-0.52849
Anaerorhabdus_furcosa	Anaerofustis_stercorihominis	-0.55581
Anaerorhabdus_furcosa	Enterorhabdus_caecimuris	-0.660368
Anaerorhabdus_furcosa	Phacovirus_sp.	0.634586
Anaerorhabdus_furcosa	Phacovirus_Pf-CHK1PhV	0.535338
Anaerorhabdus_furcosa	Pythium_polare_bunya-like_RNA_virus_1	-0.553089
Anaerorhabdus_furcosa	Dependoparvovirus_avian1	0.539904
Anaerorhabdus_furcosa	Rabbit_picobirnavirus_5	-0.580623
Anaerorhabdus_furcosa	Lysoka_picobirna-like_virus	-0.612733
Anaerorhabdus_furcosa	Posa-like_virus	-0.513567
Anaerorhabdus_furcosa	Macaque_picobirnavirus_20	-0.517365
Alistipes_onderdonkii	Bilophila_wadsworthia	0.672643
Alistipes_onderdonkii	Oscillibacter_valericigenes	0.549136
Alistipes_onderdonkii	Comamonas_kerstersii	0.517464
Alistipes_onderdonkii	Megrivirus_C	0.652697
Alistipes_onderdonkii	Chicken_picornavirus_4	0.591264
Alistipes_onderdonkii	Melegrivirus_A	0.717504
Alistipes_onderdonkii	Goose_calicivirus	0.591969
Alistipes_onderdonkii	Chicken_microvirus_mg7_7	-0.667862
Alistipes_onderdonkii	Rabbit_picobirnavirus_6	-0.573554
Alistipes_onderdonkii	Macaque_picobirnavirus_20	-0.524726
Clostridium_amygdalinum	Avastrovirus_1	-0.641084
Clostridium_amygdalinum	Dicistroviridae_sp.	-0.543402
Clostridium_amygdalinum	Porcine_associated_porprismacovirus	0.518297
Clostridium_amygdalinum	Thornevirus_SP15	-0.5806
Clostridium_amygdalinum	Chicken_smacovirus_mg5_1444	0.518297
Bilophila_wadsworthia	Aestuariispira_insulae	0.605495
Bilophila_wadsworthia	Chicken_picornavirus_5	0.511857
Bilophila_wadsworthia	Circoviridae_sp.	0.501544
Bilophila_wadsworthia	Megrivirus_C	0.519665
Bilophila_wadsworthia	Chimpanzee_faeces_associated_circular_DNA_virus_1	0.583126
Bilophila_wadsworthia	Kumba_picobirna-like_virus	0.532619
Bilophila_wadsworthia	Avian_nephritis_virus_3	0.564093
Bilophila_wadsworthia	Fisa-like_virus	0.512886
Bilophila_wadsworthia	Melegrivirus_A	0.543194
Bilophila_wadsworthia	Bovine_serum-associated_circular_virus	0.568724
Bilophila_wadsworthia	Chicken_microvirus_mg7_7	-0.659751
Bilophila_wadsworthia	Halophytophthora_RNA_virus_6	-0.608903
Bilophila_wadsworthia	Macaque_picobirnavirus_20	-0.614273
Clostridium_viride	Butyricimonas_synergistica	0.568724
Clostridium_viride	Chicken_picornavirus_4	0.532044
Clostridium_viride	Melegrivirus_A	0.507375
Clostridium_viride	Bovine_serum-associated_circular_virus	0.531953
Clostridium_viride	Chicken_gallivirus_1	0.656627
Clostridium_viride	Picornavirales_sp.	0.62472
Clostridium_viride	Simian_picobirnavirus	-0.659312
Clostridium_viride	Chicken_picornavirus_UCC13	0.522745
Clostridium_viride	Chicken_microvirus_mg7_14	-0.556062
Clostridium_viride	Chicken_microvirus_mg7_7	-0.528802
Clostridium_viride	uncultured_marine_virus	-0.592992
Olsenella_scatoligenes	Catabacter_hongkongensis	0.525829
Olsenella_scatoligenes	Faecalicoccus_pleomorphus	0.512151
Olsenella_scatoligenes	Butyricimonas_virosa	0.546875
Olsenella_scatoligenes	Phacovirus_sp.	0.504093
Olsenella_scatoligenes	Qubevirus_faecium	0.625074
Olsenella_scatoligenes	Beihai_tombus-like_virus_15	-0.64327
Olsenella_scatoligenes	Camula_virus	-0.609324
Olsenella_scatoligenes	Cressdnaviricota_sp.	0.587259
Olsenella_scatoligenes	Picobirnavirus_wolfPRT1892015	0.619508
Olsenella_scatoligenes	Chicken_microvirus_mg4_115	0.534644
Olsenella_scatoligenes	Pink-eared_duck_picobirnavirus	0.57453
Olsenella_scatoligenes	Pythium_polare_bunya-like_RNA_virus_1	-0.560263
Olsenella_scatoligenes	Chicken_microvirus_mg6_154	-0.557634
Olsenella_scatoligenes	Dependoparvovirus_avian1	0.682772
Olsenella_scatoligenes	Picobirnavirus_PREDICT_PbV-43	-0.557634
Olsenella_scatoligenes	Lysoka_picobirna-like_virus	-0.502212
Olsenella_scatoligenes	Bacteriophage_sp.	0.583895
Gallibacterium_anatis	Comamonas_kerstersii	0.55057
Gallibacterium_anatis	Pink-eared_duck_picobirnavirus	-0.526157
Gallibacterium_anatis	Smacoviridae_sp.	-0.78296
Gallibacterium_anatis	Chicken_smacovirus_mg2_55	-0.502212
Gallibacterium_anatis	Picobirnavirus_turkeyMD-2010	-0.585233
Lactobacillus_coleohominis	Lactobacillus_saerimneri	0.553555
Lactobacillus_coleohominis	Anaerofustis_stercorihominis	0.635442
Lactobacillus_coleohominis	Corynebacterium_stationis	0.517036
Lactobacillus_coleohominis	Enterorhabdus_caecimuris	0.547438
Lactobacillus_coleohominis	Camula_virus	0.692987
Lactobacillus_coleohominis	Jingmen_picorna-like_virus	-0.502802
Lactobacillus_coleohominis	Dicistroviridae_sp.	-0.588791
Lactobacillus_coleohominis	Kristianstad_virus	-0.562938
Lactobacillus_coleohominis	Chicken_stool_associated_circular_virus_1	0.556956
Lactobacillus_coleohominis	Avian_picobirnavirus_GI	-0.502045
Lactobacillus_coleohominis	Avian_nephritis_virus_3	-0.572174
Lactobacillus_coleohominis	Thornevirus_SP15	-0.517987
Lactobacillus_coleohominis	Mischke_partiti-like_virus	-0.537376
Lactobacillus_coleohominis	Caudoviricetes_sp.	-0.673487
Lactobacillus_coleohominis	Chicken_microvirus_mg8_48	0.565097
Catabacter_hongkongensis	Pink-eared_duck_picobirnavirus	0.558104
Catabacter_hongkongensis	Beihai_blue_swimmer_crab_virus_2	0.511925
Catabacter_hongkongensis	Macaque_picobirnavirus_25	0.551678
Catabacter_hongkongensis	Ovine_picobirnavirus	0.602955
Lactobacillus_saerimneri	Anaerofustis_stercorihominis	0.627106
Lactobacillus_saerimneri	Faecalicoccus_pleomorphus	-0.568405
Lactobacillus_saerimneri	Enterorhabdus_caecimuris	0.542256
Lactobacillus_saerimneri	Chicken_microvirus_mg4_115	-0.565518
Lactobacillus_saerimneri	Microviridae_phi-CA82	-0.57295
Lactobacillus_saerimneri	Dicistroviridae_sp.	-0.609737
Lactobacillus_saerimneri	Chicken_stool_associated_circular_virus_1	0.683788
Lactobacillus_saerimneri	Nauglamirvirus_anduin	-0.571038
Lactobacillus_saerimneri	Porcine_serum_associated_circular_DNA_virus_2	-0.51908
Lactobacillus_saerimneri	Picobirnavirus_PREDICT_PbV-37	-0.52539
Lactobacillus_saerimneri	Caudoviricetes_sp.	-0.547469
Lactobacillus_saerimneri	Macaque_picobirnavirus_32	-0.51875
Lactobacillus_saerimneri	Bacteriophage_sp.	-0.707963
Lactobacillus_saerimneri	Picobirnavirus_PREDICT_PbV-83	-0.62491
Lactobacillus_saerimneri	Chicken_microvirus_mg8_48	0.573369
Anaerofustis_stercorihominis	Corynebacterium_stationis	0.533364
Anaerofustis_stercorihominis	Enterorhabdus_caecimuris	0.75593
Anaerofustis_stercorihominis	Beihai_tombus-like_virus_15	0.516991
Anaerofustis_stercorihominis	Camula_virus	0.665207
Anaerofustis_stercorihominis	Chicken_microvirus_mg4_115	-0.501111
Anaerofustis_stercorihominis	Chicken_stool_associated_circular_virus_1	0.539603
Anaerofustis_stercorihominis	Fox_fecal_picobirnavirus	0.550516
Anaerofustis_stercorihominis	Macaque_picobirnavirus_12	-0.510203
Anaerofustis_stercorihominis	Picobirnavirus_PREDICT_PbV-43	0.701863
Anaerofustis_stercorihominis	Chicken_microvirus_mg5_146	-0.55601
Anaerofustis_stercorihominis	Thornevirus_SP15	-0.609274
Anaerofustis_stercorihominis	Caudoviricetes_sp.	-0.574553
Butyricimonas_synergistica	Aestuariispira_insulae	0.529183
Butyricimonas_synergistica	Butyricimonas_faecihominis	0.54399
Butyricimonas_synergistica	Clostridium_propionicum	0.54399
Butyricimonas_synergistica	Porcine_associated_porprismacovirus_8	0.638132
Butyricimonas_synergistica	Sewage-associated_circular_DNA_virus-9	0.537506
Butyricimonas_synergistica	Bovine_serum-associated_circular_virus	0.560311
Butyricimonas_synergistica	Chicken_gallivirus_1	0.573025
Butyricimonas_synergistica	Picobirnavirus_dogKNA2015	0.579871
Butyricimonas_synergistica	Picornavirales_sp.	0.566632
Butyricimonas_synergistica	Murine_picobirnavirus_2	0.596045
Butyricimonas_synergistica	Chicken_virus_mg6_2056	0.533602
Faecalicoccus_pleomorphus	Phacovirus_sp.	0.652594
Faecalicoccus_pleomorphus	Phacovirus_Pf-CHK1PhV	0.563604
Faecalicoccus_pleomorphus	Chicken_picornavirus_UCCPhV	0.68133
Faecalicoccus_pleomorphus	Chicken_microvirus_mg7_10	0.582143
Faecalicoccus_pleomorphus	Dickeya_phage_phiDP23.1	0.538575
Faecalicoccus_pleomorphus	Chicken_microvirus_mg4_115	0.738803
Faecalicoccus_pleomorphus	Pythium_polare_bunya-like_RNA_virus_1	-0.689556
Faecalicoccus_pleomorphus	Megrivirus_C	0.528378
Faecalicoccus_pleomorphus	Microviridae_phi-CA82	0.542671
Faecalicoccus_pleomorphus	Chicken_picornavirus_HK-2014	0.693381
Faecalicoccus_pleomorphus	Chicken_virus_mg5_2197	0.60806
Faecalicoccus_pleomorphus	Wuhan_fly_virus_5	0.500119
Faecalicoccus_pleomorphus	Avian_leukosis_virus	0.591413
Faecalicoccus_pleomorphus	Dependoparvovirus_avian1	0.570257
Faecalicoccus_pleomorphus	Turkey_picornavirus	-0.539866
Faecalicoccus_pleomorphus	Rabbit_picobirnavirus_3	-0.547934
Faecalicoccus_pleomorphus	Picobirnavirus_PREDICT_PbV-37	0.578919
Faecalicoccus_pleomorphus	Halophytophthora_RNA_virus_7	0.597357
Faecalicoccus_pleomorphus	Macaque_picobirnavirus_32	0.576938
Faecalicoccus_pleomorphus	Bacteriophage_sp.	0.692569
Faecalicoccus_pleomorphus	Asum_virus	0.694865
Faecalicoccus_pleomorphus	UR2_sarcoma_virus	0.546919
Clostridium_spiroforme	Caliciviridae_sp.	0.630396
Clostridium_spiroforme	Goose_calicivirus	0.509029
Clostridium_spiroforme	Picobirnavirus_dogKNA2015	-0.670086
Clostridium_spiroforme	Murine_picobirnavirus_2	-0.659852
Clostridium_spiroforme	Chicken_virus_mg6_2056	-0.508086
Clostridium_spiroforme	Chicken_virus_mg5_2676	-0.561731
Clostridium_spiroforme	Chicken_microvirus_mg8_95	-0.521471
Clostridium_colinum	Gallivirus_A	-0.52509
Clostridium_colinum	Chicken_microvirus_mg7_10	-0.539904
Clostridium_colinum	Picobirnavirus_wolfPRT1892015	-0.566241
Clostridium_colinum	Chicken_microvirus_mg4_115	-0.574471
Clostridium_colinum	Sicinivirus_10	-0.679818
Clostridium_colinum	Chicken_virus_mg5_2197	-0.657598
Clostridium_colinum	Wuhan_fly_virus_5	-0.501628
Clostridium_colinum	Avian_leukosis_virus	-0.506983
Clostridium_colinum	Gervais_tombus-like_virus	-0.668838
Clostridium_colinum	uncultured_virus	-0.581348
Clostridium_colinum	Oengusvirus_oengus	-0.534058
Clostridium_colinum	Tasmanian_devil-associated_picobirnavirus_1	-0.606771
Clostridium_colinum	Picobirnavirus_PREDICT_PbV-64	-0.547934
Methanobrevibacter_woesei	Smacoviridae_sp.	0.60401
Methanobrevibacter_woesei	Chicken_virus_mg7_59	0.531528
Methanobrevibacter_woesei	Shelduck_picobirnavirus_I	0.502045
Methanobrevibacter_woesei	Bovine_serum-associated_circular_virus	0.566632
Methanobrevibacter_woesei	Tortoise_microvirus_100	0.51296
Methanobrevibacter_woesei	Chicken_smacovirus_mg2_55	0.714344
Methanobrevibacter_woesei	Macaque_picobirnavirus_25	-0.561922
Methanobrevibacter_woesei	Chicken_microvirus_mg8_45	0.518006
Methanobrevibacter_woesei	Chicken_microvirus_mg8_102	0.526126
Aestuariispira_insulae	Butyricimonas_virosa	0.55708
Aestuariispira_insulae	Bacteroides_clarus	0.607988
Aestuariispira_insulae	Butyricimonas_faecihominis	0.54399
Aestuariispira_insulae	Anaerobiospirillum_succiniciproducens	0.607988
Aestuariispira_insulae	Clostridium_propionicum	0.54399
Aestuariispira_insulae	Avian_coronavirus	0.558772
Aestuariispira_insulae	Avisivirus_B	-0.534583
Aestuariispira_insulae	Jingmen_picorna-like_virus	-0.50874
Aestuariispira_insulae	Avisivirus_Pf-CHK1AsV	-0.524907
Aestuariispira_insulae	Tundra_vole_stool-associated_circular_virus	-0.514793
Aestuariispira_insulae	Kumba_picobirna-like_virus	0.573286
Aestuariispira_insulae	Rabbit_picobirnavirus_5	-0.514793
Aestuariispira_insulae	Melegrivirus_A	0.527317
Aestuariispira_insulae	Bovine_serum-associated_circular_virus	0.560311
Aestuariispira_insulae	Halophytophthora_RNA_virus_7	0.524209
Aestuariispira_insulae	Equine_infectious_anemia_virus	0.585884
Aestuariispira_insulae	Chicken_virus_mg4_1578	0.544956
Corynebacterium_stationis	Gallivirus_Pf-CHK1GV	-0.561277
Corynebacterium_stationis	Beihai_tombus-like_virus_15	0.675904
Corynebacterium_stationis	Camula_virus	0.608709
Corynebacterium_stationis	Otarine_picobirnavirus	-0.54349
Corynebacterium_stationis	Chicken_stool-associated_circular_virus	-0.569803
Corynebacterium_stationis	Chicken_microvirus_mg6_154	0.561192
Corynebacterium_stationis	Thornevirus_SP15	-0.658621
Corynebacterium_stationis	Duck_astrovirus_CPH	-0.511486
Corynebacterium_stationis	Chicken_microvirus_mg8_48	0.528652
Oscillibacter_valericigenes	Comamonas_kerstersii	0.745241
Oscillibacter_valericigenes	Anaeroplasma_abactoclasticum	0.662666
Oscillibacter_valericigenes	Nacovirus_A	0.544016
Oscillibacter_valericigenes	Sicinivirus_10	0.501191
Oscillibacter_valericigenes	Caliciviridae_sp.	0.503297
Oscillibacter_valericigenes	Jingmen_tombus-like_virus_2	0.595658
Oscillibacter_valericigenes	Avocet_calicivirus	0.541145
Oscillibacter_valericigenes	Goose_calicivirus	0.668853
Oscillibacter_valericigenes	Gokushovirus_MK-2017	0.504994
Oscillibacter_valericigenes	Alces_alces_faeces_associated_microvirus_MP21_4718	0.745385
Comamonas_kerstersii	Chicken_picornavirus_4	0.521195
Comamonas_kerstersii	Jingmen_tombus-like_virus_2	0.540192
Comamonas_kerstersii	Avocet_calicivirus	0.503969
Comamonas_kerstersii	Goose_calicivirus	0.536806
Comamonas_kerstersii	Picobirnavirus_Equ2	0.615185
Comamonas_kerstersii	Alces_alces_faeces_associated_microvirus_MP21_4718	0.741113
Butyricimonas_virosa	Bacteroides_clarus	0.540655
Butyricimonas_virosa	Bacteroides_dorei	0.520749
Butyricimonas_virosa	Anaerobiospirillum_succiniciproducens	0.540655
Butyricimonas_virosa	Asum_virus	0.512098
Bacteroides_clarus	Anaerobiospirillum_succiniciproducens	1
Bacteroides_clarus	Aeriscardovia_aeriphila	0.725476
Bacteroides_clarus	Halophytophthora_RNA_virus_7	0.540655
Enterorhabdus_caecimuris	Beihai_tombus-like_virus_15	0.616272
Enterorhabdus_caecimuris	Phacovirus_Pf-CHK1PhV	-0.564647
Enterorhabdus_caecimuris	Camula_virus	0.696935
Enterorhabdus_caecimuris	Husavirus_sp.	-0.537893
Enterorhabdus_caecimuris	Chicken_microvirus_mg4_115	-0.504418
Enterorhabdus_caecimuris	Posavirus_12	-0.533366
Enterorhabdus_caecimuris	Leviviridae_sp.	0.574359
Enterorhabdus_caecimuris	Pythium_polare_bunya-like_RNA_virus_1	0.602259
Enterorhabdus_caecimuris	Megrivirus_C	-0.610894
Enterorhabdus_caecimuris	Otarine_picobirnavirus	-0.522702
Enterorhabdus_caecimuris	Microviridae_phi-CA82	-0.588447
Enterorhabdus_caecimuris	Dicistroviridae_sp.	-0.588447
Enterorhabdus_caecimuris	Chicken_stool_associated_circular_virus_1	0.698932
Enterorhabdus_caecimuris	Nauglamirvirus_anduin	-0.547186
Enterorhabdus_caecimuris	Chicken_microvirus_mg6_154	0.754668
Enterorhabdus_caecimuris	Chicken_stool_associated_circular_virus_2	0.619046
Enterorhabdus_caecimuris	Rabbit_picobirnavirus_5	0.563507
Enterorhabdus_caecimuris	Picobirnavirus_PREDICT_PbV-43	0.581776
Enterorhabdus_caecimuris	Thornevirus_SP15	-0.645051
Enterorhabdus_caecimuris	Lysoka_picobirna-like_virus	0.508516
Enterorhabdus_caecimuris	Chicken_microvirus_mg8_48	0.697692
Enterorhabdus_caecimuris	Macaque_picobirnavirus_20	0.511376
Butyricimonas_faecihominis	Clostridium_propionicum	1
Bacteroides_dorei	Pink-eared_duck_picobirnavirus	0.556353
Bacteroides_dorei	Fox_picobirnavirus	0.510585
Bacteroides_dorei	Porprismacovirus_turas1	0.607988
Anaerobiospirillum_succiniciproducens	Aeriscardovia_aeriphila	0.725476
Anaerobiospirillum_succiniciproducens	Halophytophthora_RNA_virus_7	0.540655
Brachyspira_pilosicoli	Aeriscardovia_aeriphila	0.64911
Brachyspira_pilosicoli	Enterococcus_faecalis	0.64911
Brachybacterium_conglomeratum	Bacteroides_ovatus	0.5
Brachybacterium_conglomeratum	Facklamia_tabacinasalis	0.64911
Brachybacterium_conglomeratum	RD114_retrovirus	0.64911
Brachybacterium_conglomeratum	Feline_endogenous_virus	0.64911
Brachybacterium_conglomeratum	Fox_picobirnavirus	-0.51974
Anaeroplasma_abactoclasticum	Jingmen_tombus-like_virus_2	0.607928
Anaeroplasma_abactoclasticum	Goose_calicivirus	0.514792
Anaeroplasma_abactoclasticum	Chicken_picornavirus_UCC13	0.612637
Anaeroplasma_abactoclasticum	Alces_alces_faeces_associated_microvirus_MP21_4718	0.666795
Aeriscardovia_aeriphila	Chicken_virus_mg4_1578	0.504631
Aeriscardovia_aeriphila	Ovine_picobirnavirus	0.532976
Enterococcus_faecalis	Facklamia_tabacinasalis	0.725476
Enterococcus_faecalis	RD114_retrovirus	0.725476
Enterococcus_faecalis	Feline_endogenous_virus	0.725476
Bacteroides_ovatus	Picobirnavirus_GIPBVturkeyUSAMN-12011	0.532315
Bacteroides_ovatus	Picobirnavirus_GIPBVbovineBRAPBV18_PR2014	0.572367
Bacteroides_ovatus	Picornavirales_Bu-3	0.638759
Bacteroides_ovatus	Wuhan_arthropod_virus_2	0.793946
Clostridium_disporicum	Towan_virus	0.64911
Clostridium_disporicum	Chicken_microvirus_mg8_48	0.540655
Facklamia_tabacinasalis	RD114_retrovirus	1
Facklamia_tabacinasalis	Feline_endogenous_virus	1
Lachnospira_multipara	Picobirnavirus_Equ2	0.540655
Lachnospira_multipara	Wuhan_arthropod_virus_2	0.54399
Tremovirus_A	Sicinivirus_sp.	-0.515789
Tremovirus_A	Chicken_picobirnavirus	-0.524812
Tremovirus_A	Posavirus_1	-0.621053
Tremovirus_A	Picornavirales_Tottori-HG1	-0.556391
Tremovirus_A	Chicken_microvirus_mg7_10	-0.590977
Tremovirus_A	Picornavirales_Tottori-HG2	-0.568421
Tremovirus_A	Orivirus_A	-0.583459
Tremovirus_A	Jingmen_picorna-like_virus	-0.501507
Tremovirus_A	Avastrovirus_2	-0.542857
Tremovirus_A	Macaque_picobirnavirus_2	-0.616608
Tremovirus_A	Nacovirus_A	-0.500014
Tremovirus_A	Sicinivirus_10	-0.578947
Tremovirus_A	Microviridae_phi-CA82	-0.596987
Tremovirus_A	Dicistroviridae_sp.	-0.746991
Tremovirus_A	Chicken_stool_associated_circular_virus_1	0.52357
Tremovirus_A	Nauglamirvirus_anduin	-0.536145
Tremovirus_A	Aveparvovirus_galliform1	-0.673217
Tremovirus_A	Tasmanian_devil-associated_picobirnavirus_1	-0.532629
Sicinivirus_A	Sicinivirus_sp.	0.842105
Sicinivirus_A	Phacovirus_sp.	-0.589474
Sicinivirus_A	Chicken_picornavirus_1	0.878195
Sicinivirus_A	Picobirnavirus_sp.	0.578947
Sicinivirus_A	Orivirus_A	0.609023
Sicinivirus_A	Jingmen_picorna-like_virus	0.573796
Sicinivirus_A	Avisivirus_Pf-CHK1AsV	0.533835
Sicinivirus_A	Porcine_picobirnavirus	0.524812
Sicinivirus_A	Sicinivirus_UCC1	0.766917
Sicinivirus_A	Picobirnavirus_GIPBVturkeyUSAMN-12011	0.728279
Sicinivirus_A	Avisivirus_C	0.508811
Sicinivirus_A	Rabbit_picobirnavirus_3	0.511921
Sicinivirus_A	Lysoka_picobirna-like_virus	0.54321
Sicinivirus_A	Posa-like_virus	0.513567
Avian_coronavirus	Avisivirus_B	-0.639098
Avian_coronavirus	Circular_ssDNA_virus_sp.	0.52854
Avian_coronavirus	Microviridae_sp.	0.596992
Avian_coronavirus	Leviviridae_sp.	-0.69699
Avian_coronavirus	Chimpanzee_faeces_associated_circular_DNA_virus_1	0.714451
Avian_coronavirus	Chicken_virus_mg8_324	0.526736
Avian_coronavirus	Chicken_picornavirus_4	0.558337
Avian_coronavirus	Kumba_picobirna-like_virus	0.685714
Avian_coronavirus	Melegrivirus_A	0.553866
Avian_coronavirus	Mischke_partiti-like_virus	0.548501
Avian_coronavirus	Odonata-associated_circular_virus-17	0.5711
Avian_coronavirus	Chicken_virus_mg4_1578	0.578748
Avian_coronavirus	Halophytophthora_RNA_virus_6	-0.526157
Sicinivirus_sp.	Chicken_picornavirus_1	0.893233
Sicinivirus_sp.	Picobirnavirus_sp.	0.62406
Sicinivirus_sp.	Avastrovirus_1	0.552839
Sicinivirus_sp.	Orivirus_A	0.760902
Sicinivirus_sp.	Avastrovirus_2	0.595489
Sicinivirus_sp.	Avisivirus_Pf-CHK1AsV	0.500752
Sicinivirus_sp.	Porcine_picobirnavirus	0.598496
Sicinivirus_sp.	Sicinivirus_UCC1	0.565414
Sicinivirus_sp.	Bovine_picobirnavirus	0.524812
Sicinivirus_sp.	Avian_picobirnavirus_GI	0.556391
Sicinivirus_sp.	Picobirnavirus_GIPBVturkeyUSAMN-12011	0.531613
Sicinivirus_sp.	Lysoka_picobirna-like_virus	0.550626
Gallivirus_A	Gallivirus_Pf-CHK1GV	0.745865
Gallivirus_A	Chicken_picobirnavirus	0.634586
Gallivirus_A	Avisivirus_B	0.526316
Gallivirus_A	Avian_nephritis_virus	0.518797
Gallivirus_A	Chicken_calicivirus_UCC1	0.693233
Gallivirus_A	Picobirnavirus_sp.	0.560902
Gallivirus_A	Avisivirus_Pf-CHK1AsV	0.613534
Gallivirus_A	Sicinivirus_UCC1	0.547368
Gallivirus_A	Orthopicobirnavirus_hominis	0.699248
Gallivirus_A	Shelduck_picobirnavirus_I	0.553383
Gallivirus_A	Mongoose_picobirnavirus	0.575302
Gallivirus_A	Gervais_tombus-like_virus	0.727285
Gallivirus_A	Avisivirus_C	0.59426
Gallivirus_A	Chicken_gallivirus_1	0.500381
Gallivirus_A	Avisivirus_AVE052AsV	0.536032
Gallivirus_A	Shelduck_picobirnavirus_II	0.585389
Gallivirus_A	Quail_picornavirus_QPV1HUN2010	0.506921
Gallivirus_A	Macaque_picobirnavirus_36	0.528382
Gallivirus_Pf-CHK1GV	Chicken_picobirnavirus	0.530827
Gallivirus_Pf-CHK1GV	Bavaria_virus	0.520301
Gallivirus_Pf-CHK1GV	Avian_nephritis_virus	0.512782
Gallivirus_Pf-CHK1GV	Marmot_picobirnavirus	0.503759
Gallivirus_Pf-CHK1GV	Chicken_calicivirus_UCC1	0.652632
Gallivirus_Pf-CHK1GV	Orthopicobirnavirus_hominis	0.62406
Gallivirus_Pf-CHK1GV	Shelduck_picobirnavirus_I	0.760902
Gallivirus_Pf-CHK1GV	Gervais_tombus-like_virus	0.527855
Gallivirus_Pf-CHK1GV	Chicken_gallivirus_1	0.607551
Gallivirus_Pf-CHK1GV	Shelduck_picobirnavirus_II	0.648383
Gallivirus_Pf-CHK1GV	Equine_infectious_anemia_virus	0.515855
Gallivirus_Pf-CHK1GV	Chicken_microvirus_mg8_45	0.519475
Gallivirus_Pf-CHK1GV	Rabbit_picobirnavirus_1	0.533013
Chicken_picobirnavirus	Marmot_picobirnavirus	0.784962
Chicken_picobirnavirus	Chicken_calicivirus_UCC1	0.703759
Chicken_picobirnavirus	Picobirnavirus_sp.	0.627068
Chicken_picobirnavirus	Orivirus_A	0.589474
Chicken_picobirnavirus	Porcine_picobirnavirus	0.790977
Chicken_picobirnavirus	Turkey_picobirnavirus	0.619549
Chicken_picobirnavirus	Nauglamirvirus_anduin	0.506025
Chicken_picobirnavirus	Fox_picobirnavirus	0.506205
Chicken_picobirnavirus	Shelduck_picobirnavirus_I	0.590977
Chicken_picobirnavirus	Mongoose_picobirnavirus	0.646085
Chicken_picobirnavirus	uncultured_picobirnavirus	0.510522
Posavirus_1	Picornavirales_Tottori-HG1	0.784962
Posavirus_1	Picornavirales_Tottori-HG2	0.881203
Posavirus_1	Dromedary_picobirnavirus	0.560902
Posavirus_1	Beihai_blue_swimmer_crab_virus_2	-0.572175
Posavirus_1	Fisa-like_virus	0.691361
Posavirus_1	Grey_teal_picobirnavirus_y	0.512456
Posavirus_1	Picobirnavirus_PREDICT_PbV-43	0.619331
Phacovirus_sp.	Chicken_picornavirus_1	-0.526316
Phacovirus_sp.	Phacovirus_Pf-CHK1PhV	0.870677
Phacovirus_sp.	Chicken_picornavirus_UCCPhV	0.738346
Phacovirus_sp.	Sicinivirus_UCC1	-0.520301
Phacovirus_sp.	Pythium_polare_bunya-like_RNA_virus_1	-0.665727
Phacovirus_sp.	Chicken_picornavirus_HK-2014	0.655639
Phacovirus_sp.	Chicken_virus_mg5_2197	0.536222
Phacovirus_sp.	Chicken_microvirus_mg6_154	-0.582277
Phacovirus_sp.	Phacovirus_TRPhV	0.687552
Phacovirus_sp.	Picobirnavirus_GIPBVturkeyUSAMN-12011	-0.619191
Phacovirus_sp.	Dependoparvovirus_avian1	0.625499
Phacovirus_sp.	Rabbit_picobirnavirus_5	-0.595101
Phacovirus_sp.	Halophytophthora_RNA_virus_7	0.584006
Phacovirus_sp.	Lysoka_picobirna-like_virus	-0.531159
Phacovirus_sp.	Wuhan_arthropod_virus_2	-0.553934
Bavaria_virus	Chicken_astrovirus	0.633083
Bavaria_virus	Chicken_calicivirus_UCC1	0.595489
Bavaria_virus	Gokushovirus_WZ-2015a	-0.524812
Bavaria_virus	Calicivirus_chickenV0021Bayern2004	0.604739
Bavaria_virus	Shelduck_picobirnavirus_I	0.595489
Bavaria_virus	Calicivirus_chickenV0027Bayern2004	0.626873
Bavaria_virus	Duck_astrovirus_CPH	0.600475
Bavaria_virus	Tortoise_microvirus_13	-0.610555
Qubevirus_faecium	Dickeya_phage_phiDP23.1	0.58335
Qubevirus_faecium	Chicken_virus_mg6_1197	-0.559345
Qubevirus_faecium	Duck_astrovirus_CPH	0.524421
Qubevirus_faecium	Termite_gut_associated_microvirus_1	0.549814
Chicken_picornavirus_1	Chicken_picornavirus_5	-0.506958
Chicken_picornavirus_1	Picobirnavirus_sp.	0.562406
Chicken_picornavirus_1	Orivirus_A	0.517293
Chicken_picornavirus_1	Sicinivirus_UCC1	0.566917
Chicken_picornavirus_1	Bovine_picobirnavirus	0.515789
Chicken_picornavirus_1	Picobirnavirus_GIPBVturkeyUSAMN-12011	0.659139
Chicken_picornavirus_1	Rabbit_picobirnavirus_5	0.541762
Chicken_picornavirus_1	Lysoka_picobirna-like_virus	0.634981
Beihai_tombus-like_virus_15	Chicken_virus_mg4_657	-0.550947
Beihai_tombus-like_virus_15	Camula_virus	0.729323
Beihai_tombus-like_virus_15	Cressdnaviricota_sp.	-0.566917
Beihai_tombus-like_virus_15	Chicken_microvirus_mg4_115	-0.572932
Beihai_tombus-like_virus_15	Pythium_polare_bunya-like_RNA_virus_1	0.631547
Beihai_tombus-like_virus_15	Chicken_picornavirus_HK-2014	-0.526316
Beihai_tombus-like_virus_15	Chicken_microvirus_mg6_154	0.739315
Beihai_tombus-like_virus_15	Dependoparvovirus_avian1	-0.602454
Beihai_tombus-like_virus_15	Thornevirus_SP15	-0.529815
Beihai_tombus-like_virus_15	Lysoka_picobirna-like_virus	0.517255
Beihai_tombus-like_virus_15	Simian_picobirnavirus	0.506481
Beihai_tombus-like_virus_15	Bacteriophage_sp.	-0.509037
Beihai_tombus-like_virus_15	Chicken_microvirus_mg8_45	-0.635631
Beihai_tombus-like_virus_15	Chicken_microvirus_mg8_48	0.604441
Avisivirus_B	Avisivirus_Pf-CHK1AsV	0.64812
Avisivirus_B	Leviviridae_sp.	0.521227
Avisivirus_B	Nacovirus_A	0.540925
Avisivirus_B	Wuhan_fly_virus_5	0.501547
Avisivirus_B	Avisivirus_AVE052AsV	0.573869
Avisivirus_B	Picornavirales_Bu-3	-0.550626
Avisivirus_B	Quail_picornavirus_QPV1HUN2010	0.545483
Avisivirus_B	UR2_sarcoma_virus	0.600808
Avisivirus_B	Ovine_picobirnavirus	-0.590922
Avisivirus_B	Macaque_picobirnavirus_36	0.515213
Chicken_astrovirus	Picornavirus_chickenCHK1USA2010	0.536842
Chicken_astrovirus	Avastrovirus_1	0.676194
Chicken_astrovirus	Avisivirus_Pf-CHK1AsV	0.512782
Chicken_astrovirus	Calicivirus_chickenV0027Bayern2004	0.519321
Chicken_astrovirus	Duck_astrovirus_CPH	0.608243
Chicken_astrovirus	Termite_gut_associated_microvirus_1	0.594721
Chicken_astrovirus	Chicken_proventriculitis_virus	-0.612733
Phacovirus_Pf-CHK1PhV	Chicken_picornavirus_UCCPhV	0.715789
Phacovirus_Pf-CHK1PhV	Pythium_polare_bunya-like_RNA_virus_1	-0.60902
Phacovirus_Pf-CHK1PhV	Microviridae_phi-CA82	0.513651
Phacovirus_Pf-CHK1PhV	Chicken_picornavirus_HK-2014	0.774436
Phacovirus_Pf-CHK1PhV	Chicken_microvirus_mg6_154	-0.742844
Phacovirus_Pf-CHK1PhV	Phacovirus_TRPhV	0.538872
Phacovirus_Pf-CHK1PhV	Kumba_picobirna-like_virus	0.547368
Phacovirus_Pf-CHK1PhV	Picobirnavirus_GIPBVturkeyUSAMN-12011	-0.599217
Phacovirus_Pf-CHK1PhV	Halophytophthora_RNA_virus_7	0.547438
Phacovirus_Pf-CHK1PhV	Thornevirus_SP15	0.504155
Phacovirus_Pf-CHK1PhV	Macaque_picobirnavirus_20	-0.638673
Chicken_virus_mg4_657	Cressdnaviricota_sp.	0.82793
Chicken_virus_mg4_657	Riboviria_sp.	0.515475
Chicken_virus_mg4_657	Circoviridae_sp.	0.835985
Chicken_virus_mg4_657	Sicinivirus_10	0.535098
Chicken_virus_mg4_657	Chicken_virus_mg5_2197	0.512802
Chicken_virus_mg4_657	Nauglamirvirus_anduin	0.598641
Chicken_virus_mg4_657	Fisa-like_virus	0.632375
Chicken_virus_mg4_657	Rabbit_picobirnavirus_5	-0.537692
Chicken_virus_mg4_657	Porcine_serum_associated_circular_DNA_virus_2	0.502006
Chicken_virus_mg4_657	Melegrivirus_A	0.552841
Chicken_virus_mg4_657	Equine_infectious_anemia_virus	0.504038
Chicken_virus_mg4_657	Phacovirus_DMPhV	0.508031
Chicken_virus_mg4_657	Chicken_microvirus_mg8_45	0.504166
Chicken_virus_mg4_657	Chicken_microvirus_mg8_48	-0.527916
Chicken_virus_mg4_657	Chicken_virus_mg8_273	0.760701
Chicken_virus_mg4_657	Asum_virus	0.558456
Picornavirales_Tottori-HG1	Picornavirales_Tottori-HG2	0.87218
Picornavirales_Tottori-HG1	Dromedary_picobirnavirus	0.604511
Picornavirales_Tottori-HG1	Beihai_blue_swimmer_crab_virus_2	-0.579704
Picornavirales_Tottori-HG1	Fisa-like_virus	0.642422
Picornavirales_Tottori-HG1	Chicken_microvirus_mg7_16	0.687477
Picornavirales_Tottori-HG1	Tasmanian_devil-associated_picobirnavirus_1	0.583241
Picornavirales_Tottori-HG1	Tortoise_microvirus_13	0.6692
Picornavirales_Tottori-HG1	Posa-like_virus	0.707801
Camula_virus	Leviviridae_sp.	0.519712
Camula_virus	Chicken_stool_associated_circular_virus_1	0.584162
Camula_virus	Chicken_microvirus_mg6_154	0.645798
Camula_virus	Picobirnavirus_PREDICT_PbV-43	0.545223
Camula_virus	Thornevirus_SP15	-0.513211
Camula_virus	Mischke_partiti-like_virus	-0.534864
Camula_virus	Chicken_microvirus_mg8_48	0.572175
Chicken_picornavirus_UCCPhV	Pythium_polare_bunya-like_RNA_virus_1	-0.520463
Chicken_picornavirus_UCCPhV	Chicken_picornavirus_HK-2014	0.83609
Chicken_picornavirus_UCCPhV	Chicken_microvirus_mg6_154	-0.522285
Chicken_picornavirus_UCCPhV	Phacovirus_VGPhV	0.712782
Chicken_picornavirus_UCCPhV	uncultured_virus	0.56767
Chicken_picornavirus_UCCPhV	Duck_astrovirus_CPH	0.510365
Chicken_picornavirus_UCCPhV	Quail_picornavirus_QPV1HUN2010	0.543073
Chicken_picornavirus_UCCPhV	Phacovirus_DMPhV	0.565567
Chicken_picornavirus_UCCPhV	Bacteriophage_sp.	0.510543
Cressdnaviricota_sp.	Circoviridae_sp.	0.832836
Cressdnaviricota_sp.	Rabbit_picobirnavirus_5	-0.572241
Cressdnaviricota_sp.	Equine_infectious_anemia_virus	0.595862
Cressdnaviricota_sp.	Lysoka_picobirna-like_virus	-0.526524
Cressdnaviricota_sp.	Chicken_microvirus_mg8_48	-0.513022
Cressdnaviricota_sp.	Chicken_virus_mg8_273	0.80536
Cressdnaviricota_sp.	Halophytophthora_RNA_virus_6	-0.605081
Husavirus_sp.	Circular_ssDNA_virus_sp.	0.562105
Husavirus_sp.	Jingmen_picorna-like_virus	0.840959
Husavirus_sp.	Posavirus_12	0.913983
Husavirus_sp.	Macaque_picobirnavirus_2	0.817628
Husavirus_sp.	Sicinivirus_UCC1	0.524999
Husavirus_sp.	Tundra_vole_stool-associated_circular_virus	0.808108
Husavirus_sp.	Otarine_picobirnavirus	0.761972
Husavirus_sp.	Microviridae_phi-CA82	0.576593
Husavirus_sp.	Chicken_stool-associated_circular_virus	0.617521
Husavirus_sp.	Dicistroviridae_sp.	0.74627
Husavirus_sp.	Chicken_stool_associated_circular_virus_1	-0.684504
Husavirus_sp.	Nauglamirvirus_anduin	0.571578
Husavirus_sp.	Phacovirus_TRPhV	-0.526984
Husavirus_sp.	Chicken_stool_associated_circular_virus_2	-0.609533
Husavirus_sp.	Rabbit_picobirnavirus_7	0.758784
Husavirus_sp.	Picobirnavirus_GIPBVbovineBRAPBV18_PR2014	0.574
Husavirus_sp.	Porcine_serum_associated_circular_DNA_virus_2	0.629838
Husavirus_sp.	Picornavirales_Bu-3	0.622837
Husavirus_sp.	Aveparvovirus_galliform1	0.555654
Husavirus_sp.	Picobirnavirus_PREDICT_PbV-38	-0.701
Husavirus_sp.	Picobirnavirus_PREDICT_PbV-83	0.578684
Husavirus_sp.	Chicken_virus_mg6_2056	0.502473
Husavirus_sp.	Jingmen_picobirna-like_virus_1	0.599034
Husavirus_sp.	Chicken_microvirus_mg8_48	-0.530263
Husavirus_sp.	Wuhan_arthropod_virus_2	0.556467
Avian_nephritis_virus	Avastrovirus_2	0.854135
Avian_nephritis_virus	Astrovirus_HK-2014	0.792481
Avian_nephritis_virus	Halophytophthora_RNA_virus_7	0.568949
Avian_nephritis_virus	Equine_infectious_anemia_virus	0.534905
Avian_nephritis_virus	Avian_astrovirus	0.684756
Chicken_microvirus_mg7_10	Picobirnavirus_wolfPRT1892015	0.568421
Chicken_microvirus_mg7_10	Chicken_microvirus_mg4_115	0.917293
Chicken_microvirus_mg7_10	Nacovirus_A	0.760628
Chicken_microvirus_mg7_10	Pythium_polare_bunya-like_RNA_virus_1	-0.516579
Chicken_microvirus_mg7_10	Megrivirus_C	0.571429
Chicken_microvirus_mg7_10	Sicinivirus_10	0.621053
Chicken_microvirus_mg7_10	Wuhan_fly_virus_5	0.647513
Chicken_microvirus_mg7_10	Caliciviridae_sp.	0.573097
Chicken_microvirus_mg7_10	Chicken_microvirus_mg6_154	-0.541694
Chicken_microvirus_mg7_10	Jingmen_tombus-like_virus_2	0.543458
Chicken_microvirus_mg7_10	Avocet_calicivirus	0.692915
Chicken_microvirus_mg7_10	Avisivirus_AVE052AsV	0.55495
Chicken_microvirus_mg7_10	Oengusvirus_oengus	0.521227
Chicken_microvirus_mg7_10	Goose_calicivirus	0.60698
Chicken_microvirus_mg7_10	Tasmanian_devil-associated_picobirnavirus_1	0.523792
Chicken_microvirus_mg7_10	Bacteriophage_sp.	0.638555
Chicken_microvirus_mg7_10	Termite_gut_associated_microvirus_1	0.542645
Chicken_microvirus_mg7_10	Bacillus_phage_vB_BceM-HSE3	0.501347
Chicken_microvirus_mg7_10	Macaque_picobirnavirus_36	0.536612
Chicken_microvirus_mg7_10	Alces_alces_faeces_associated_microvirus_MP21_4718	0.536683
Dickeya_phage_phiDP23.1	Halophytophthora_RNA_virus_7	0.528079
Picobirnavirus_wolfPRT1892015	Chicken_microvirus_mg4_115	0.618045
Picobirnavirus_wolfPRT1892015	Gokushovirus_WZ-2015a	0.679699
Picobirnavirus_wolfPRT1892015	Pythium_polare_bunya-like_RNA_virus_1	-0.696799
Picobirnavirus_wolfPRT1892015	Chicken_virus_mg5_2197	0.52854
Picobirnavirus_wolfPRT1892015	Wuhan_fly_virus_5	0.520217
Picobirnavirus_wolfPRT1892015	Fox_picobirnavirus	0.500188
Picobirnavirus_wolfPRT1892015	Dependoparvovirus_avian1	0.579409
Picobirnavirus_wolfPRT1892015	Melegrivirus_A	0.648637
Picobirnavirus_wolfPRT1892015	Picobirnavirus_PREDICT_PbV-43	-0.536401
Picobirnavirus_wolfPRT1892015	Chicken_microvirus_mg5_146	0.734086
Picobirnavirus_wolfPRT1892015	Oengusvirus_oengus	0.590926
Picobirnavirus_wolfPRT1892015	Merch_tombus-like_virus	0.522816
Picobirnavirus_wolfPRT1892015	Picobirnavirus_Equ2	0.534532
Picobirnavirus_wolfPRT1892015	Chicken_picornavirus_UCC13	0.551395
Picobirnavirus_wolfPRT1892015	Picobirnavirus_PREDICT_PbV-64	0.72119
Marmot_picobirnavirus	Picobirnavirus_sp.	0.572932
Marmot_picobirnavirus	Porcine_picobirnavirus	0.604511
Marmot_picobirnavirus	Orthopicobirnavirus_hominis	0.568421
Marmot_picobirnavirus	Mongoose_picobirnavirus	0.534639
Marmot_picobirnavirus	uncultured_picobirnavirus	0.751305
Marmot_picobirnavirus	Rabbit_picobirnavirus_1	0.526524
Picornavirales_Tottori-HG2	Dromedary_picobirnavirus	0.569925
Picornavirales_Tottori-HG2	Beihai_blue_swimmer_crab_virus_2	-0.502267
Picornavirales_Tottori-HG2	Fisa-like_virus	0.621449
Picornavirales_Tottori-HG2	Grey_teal_picobirnavirus_y	0.510192
Picornavirales_Tottori-HG2	Picobirnavirus_PREDICT_PbV-43	0.529343
Picornavirales_Tottori-HG2	Posa-like_virus	0.679818
Chicken_picornavirus_5	Circoviridae_sp.	0.632294
Chicken_picornavirus_5	Chicken_virus_mg8_324	0.541754
Chicken_picornavirus_5	Chicken_picornavirus_4	0.629671
Chicken_picornavirus_5	Sewage-associated_circular_DNA_virus-9	0.507174
Chicken_picornavirus_5	Bovine_serum-associated_circular_virus	0.614638
Chicken_picornavirus_5	Equine_infectious_anemia_virus	0.521766
Chicken_calicivirus_UCC1	Circular_ssDNA_virus_sp.	-0.514712
Chicken_calicivirus_UCC1	Porcine_picobirnavirus	0.655639
Chicken_calicivirus_UCC1	Orthopicobirnavirus_hominis	0.566917
Chicken_calicivirus_UCC1	Shelduck_picobirnavirus_I	0.589474
Chicken_calicivirus_UCC1	Avian_picobirnavirus_GI	0.603008
Picobirnavirus_sp.	Avastrovirus_1	0.50094
Picobirnavirus_sp.	Orivirus_A	0.523308
Picobirnavirus_sp.	Porcine_picobirnavirus	0.609023
Picobirnavirus_sp.	Orthopicobirnavirus_hominis	0.601504
Picobirnavirus_sp.	Dromedary_picobirnavirus	0.523308
Picobirnavirus_sp.	Rabbit_picobirnavirus_3	0.52509
Picornavirus_chickenCHK1USA2010	Orivirus_A	0.572932
Picornavirus_chickenCHK1USA2010	Riboviria_sp.	0.565414
Picornavirus_chickenCHK1USA2010	Avian_picobirnavirus_GI	0.515789
Picornavirus_chickenCHK1USA2010	Picornavirus_chickenCHK165USA2010	0.534343
Picornavirus_chickenCHK1USA2010	Turkey_picornavirus	0.679113
Picornavirus_chickenCHK1USA2010	Chicken_proventriculitis_virus	-0.623857
Circular_ssDNA_virus_sp.	Microviridae_sp.	0.636092
Circular_ssDNA_virus_sp.	Posavirus_12	0.669883
Circular_ssDNA_virus_sp.	Leviviridae_sp.	-0.665699
Circular_ssDNA_virus_sp.	Chimpanzee_faeces_associated_circular_DNA_virus_1	0.830455
Circular_ssDNA_virus_sp.	Chicken_stool-associated_circular_virus	0.850524
Circular_ssDNA_virus_sp.	Chicken_stool_associated_circular_virus_1	-0.564321
Circular_ssDNA_virus_sp.	Chaphamaparvovirus_galliform2	-0.733933
Circular_ssDNA_virus_sp.	Protoparvovirus_HK-2014	-0.580662
Circular_ssDNA_virus_sp.	Rabbit_picobirnavirus_7	0.506451
Circular_ssDNA_virus_sp.	Picornavirales_Bu-3	0.502928
Circular_ssDNA_virus_sp.	Tortoise_microvirus_13	0.513018
Circular_ssDNA_virus_sp.	Wuhan_arthropod_virus_2	0.523962
Microviridae_sp.	Gokushovirus_WZ-2015a	0.556391
Microviridae_sp.	Chimpanzee_faeces_associated_circular_DNA_virus_1	0.677576
Microviridae_sp.	Chaphamaparvovirus_galliform2	-0.573148
Microviridae_sp.	Fox_picobirnavirus	0.531779
Microviridae_sp.	Sewage-associated_circular_DNA_virus-9	0.52509
Microviridae_sp.	Kumba_picobirna-like_virus	0.630075
Microviridae_sp.	Tortoise_microvirus_13	0.784081
Avastrovirus_1	Avastrovirus_2	0.50771
Avastrovirus_1	Avisivirus_Pf-CHK1AsV	0.581422
Avastrovirus_1	Tundra_vole_stool-associated_circular_virus	0.70509
Avastrovirus_1	Dicistroviridae_sp.	0.508539
Avastrovirus_1	Nauglamirvirus_anduin	0.562712
Avastrovirus_1	Avisivirus_C	0.591375
Avastrovirus_1	Porcine_serum_associated_circular_DNA_virus_2	0.514906
Avastrovirus_1	Caudoviricetes_sp.	0.579759
Orivirus_A	Avastrovirus_2	0.529323
Orivirus_A	Porcine_picobirnavirus	0.723308
Orivirus_A	Chicken_microvirus_mg4_164	0.55191
Jingmen_picorna-like_virus	Posavirus_12	0.707963
Jingmen_picorna-like_virus	Macaque_picobirnavirus_2	0.753592
Jingmen_picorna-like_virus	Sicinivirus_UCC1	0.500001
Jingmen_picorna-like_virus	Tundra_vole_stool-associated_circular_virus	0.836381
Jingmen_picorna-like_virus	Otarine_picobirnavirus	0.588856
Jingmen_picorna-like_virus	Dicistroviridae_sp.	0.616096
Jingmen_picorna-like_virus	Chicken_stool_associated_circular_virus_1	-0.603714
Jingmen_picorna-like_virus	Phacovirus_TRPhV	-0.551778
Jingmen_picorna-like_virus	Rabbit_picobirnavirus_7	0.59297
Jingmen_picorna-like_virus	Avisivirus_C	0.522026
Jingmen_picorna-like_virus	Picobirnavirus_GIPBVbovineBRAPBV18_PR2014	0.61673
Jingmen_picorna-like_virus	Porcine_serum_associated_circular_DNA_virus_2	0.572422
Jingmen_picorna-like_virus	Avisivirus_AVE052AsV	0.554208
Jingmen_picorna-like_virus	Aveparvovirus_galliform1	0.568833
Jingmen_picorna-like_virus	Picobirnavirus_PREDICT_PbV-38	-0.534413
Jingmen_picorna-like_virus	Chicken_microvirus_mg8_102	-0.623144
Jingmen_picorna-like_virus	Jingmen_picobirna-like_virus_1	0.514236
Jingmen_picorna-like_virus	Wuhan_arthropod_virus_2	0.50874
Jingmen_picorna-like_virus	Prokaryotic_dsDNA_virus_sp.	0.61228
Avastrovirus_2	Astrovirus_HK-2014	0.76391
Avastrovirus_2	Avian_nephritis_virus_3	0.563098
Avastrovirus_2	Avisivirus_C	0.548428
Avastrovirus_2	Picobirnavirus_GIPBVbovineBRAPBV18_PR2014	0.536401
Avastrovirus_2	Avian_astrovirus	0.684756
Avastrovirus_2	Inoviridae_sp.	-0.529552
Chicken_microvirus_mg4_115	Nacovirus_A	0.615169
Chicken_microvirus_mg4_115	Pythium_polare_bunya-like_RNA_virus_1	-0.697576
Chicken_microvirus_mg4_115	Megrivirus_C	0.649624
Chicken_microvirus_mg4_115	Sicinivirus_10	0.622556
Chicken_microvirus_mg4_115	Microviridae_phi-CA82	0.592441
Chicken_microvirus_mg4_115	Chicken_picornavirus_HK-2014	0.610526
Chicken_microvirus_mg4_115	Chicken_virus_mg5_2197	0.589998
Chicken_microvirus_mg4_115	Chicken_stool_associated_circular_virus_1	-0.527454
Chicken_microvirus_mg4_115	Wuhan_fly_virus_5	0.622054
Chicken_microvirus_mg4_115	Nauglamirvirus_anduin	0.522591
Chicken_microvirus_mg4_115	Chicken_microvirus_mg6_154	-0.631682
Chicken_microvirus_mg4_115	Jingmen_tombus-like_virus_2	0.58757
Chicken_microvirus_mg4_115	Avian_leukosis_virus	0.589474
Chicken_microvirus_mg4_115	Dependoparvovirus_avian1	0.622206
Chicken_microvirus_mg4_115	Avisivirus_AVE052AsV	0.536032
Chicken_microvirus_mg4_115	Chicken_microvirus_mg5_146	0.593483
Chicken_microvirus_mg4_115	Oengusvirus_oengus	0.534864
Chicken_microvirus_mg4_115	Merch_tombus-like_virus	0.527451
Chicken_microvirus_mg4_115	Tasmanian_devil-associated_picobirnavirus_1	0.523792
Chicken_microvirus_mg4_115	Bacteriophage_sp.	0.694278
Chicken_microvirus_mg4_115	Termite_gut_associated_microvirus_1	0.657363
Chicken_microvirus_mg4_115	UR2_sarcoma_virus	0.526736
Chicken_microvirus_mg4_115	Macaque_picobirnavirus_36	0.566241
Chicken_microvirus_mg4_115	Alces_alces_faeces_associated_microvirus_MP21_4718	0.521626
Posavirus_12	Macaque_picobirnavirus_2	0.664345
Posavirus_12	Sicinivirus_UCC1	0.508811
Posavirus_12	Tundra_vole_stool-associated_circular_virus	0.705365
Posavirus_12	Chimpanzee_faeces_associated_circular_DNA_virus_1	0.510349
Posavirus_12	Otarine_picobirnavirus	0.584162
Posavirus_12	Chicken_stool-associated_circular_virus	0.697958
Posavirus_12	Dicistroviridae_sp.	0.632436
Posavirus_12	Chicken_stool_associated_circular_virus_1	-0.616372
Posavirus_12	Chicken_stool_associated_circular_virus_2	-0.54729
Posavirus_12	Rabbit_picobirnavirus_7	0.78601
Posavirus_12	Macaque_picobirnavirus_12	0.50638
Posavirus_12	Porcine_serum_associated_circular_DNA_virus_2	0.575432
Posavirus_12	Picornavirales_Bu-3	0.652205
Posavirus_12	Picobirnavirus_PREDICT_PbV-38	-0.612558
Posavirus_12	Simian_picobirnavirus	-0.571429
Posavirus_12	Chicken_virus_mg6_2056	0.588823
Posavirus_12	Jingmen_picobirna-like_virus_1	0.625283
Posavirus_12	Chicken_microvirus_mg8_48	-0.533366
Posavirus_12	Chicken_virus_mg5_2676	0.582182
Posavirus_12	Wuhan_arthropod_virus_2	0.539813
Macaque_picobirnavirus_2	Tundra_vole_stool-associated_circular_virus	0.62412
Macaque_picobirnavirus_2	Otarine_picobirnavirus	0.744156
Macaque_picobirnavirus_2	Microviridae_phi-CA82	0.650195
Macaque_picobirnavirus_2	Dicistroviridae_sp.	0.720918
Macaque_picobirnavirus_2	Chicken_stool_associated_circular_virus_1	-0.553231
Macaque_picobirnavirus_2	Chicken_stool_associated_circular_virus_2	-0.587908
Macaque_picobirnavirus_2	Picobirnavirus_GIPBVbovineBRAPBV18_PR2014	0.78816
Macaque_picobirnavirus_2	Grey_teal_picobirnavirus_X	-0.560215
Macaque_picobirnavirus_2	Picobirnavirus_PREDICT_PbV-37	0.557625
Macaque_picobirnavirus_2	Merch_tombus-like_virus	0.535028
Macaque_picobirnavirus_2	Aveparvovirus_galliform1	0.58222
Macaque_picobirnavirus_2	Picobirnavirus_PREDICT_PbV-38	-0.737973
Macaque_picobirnavirus_2	Phacovirus_DMPhV	0.576172
[truncated: 583 more rows]

## Sheet: Young
Source	Target	Weight
Faecalibacterium_prausnitzii	Alistipes_timonensis	-0.618278
Faecalibacterium_prausnitzii	Butyricimonas_faecihominis	-0.507653
Faecalibacterium_prausnitzii	Avian_coronavirus	0.578947
Faecalibacterium_prausnitzii	Picornavirus_chickenCHK1USA2010	0.750376
Faecalibacterium_prausnitzii	Sicinivirus_sp.	-0.715789
Faecalibacterium_prausnitzii	Chicken_picornavirus_1	-0.57594
Faecalibacterium_prausnitzii	Megrivirus_C	0.526572
Faecalibacterium_prausnitzii	Bavaria_virus	-0.606015
Faecalibacterium_prausnitzii	Turkey_picornavirus	0.738346
Faecalibacterium_prausnitzii	RD114_retrovirus	-0.505493
Faecalibacterium_prausnitzii	Chicken_calicivirus_UCC1	-0.588945
Faecalibacterium_prausnitzii	Calicivirus_chickenV0021Bayern2004	-0.538872
Faecalibacterium_prausnitzii	Feline_endogenous_virus	-0.505493
Faecalibacterium_prausnitzii	Calicivirus_chickenV0027Bayern2004	-0.579243
Faecalibacterium_prausnitzii	Cryptosporidium_parvum_virus_1	0.719812
Faecalibacterium_prausnitzii	Baboon_endogenous_virus	-0.505493
Faecalibacterium_prausnitzii	Mason-Pfizer_monkey_virus	-0.507644
Faecalibacterium_prausnitzii	Kirsten_murine_sarcoma_virus	-0.511946
Faecalibacterium_prausnitzii	Eimeria_tenella_RNA_virus_1	-0.524907
Faecalibacterium_prausnitzii	Enterogokushovirus_EC6098	-0.539421
Faecalibacterium_prausnitzii	Avian_carcinoma_virus	-0.534583
Faecalibacterium_prausnitzii	Tortoise_microvirus_100	-0.50594
Bacteroides_dorei	Butyricicoccus_pullicaecorum	-0.580451
Bacteroides_dorei	Escherichia	-0.545865
Bacteroides_dorei	Alistipes_timonensis	0.552839
Bacteroides_dorei	Bacteroides_fragilis	0.560902
Bacteroides_dorei	Helicobacter_pullorum	0.720301
Bacteroides_dorei	Campylobacter_jejuni	0.570024
Bacteroides_dorei	Gemmiger_formicilis	-0.609023
Bacteroides_dorei	Clostridium_leptum	-0.554887
Bacteroides_dorei	Intestinimonas_butyriciproducens	-0.502256
Bacteroides_dorei	Bacteroides_uniformis	0.736827
Bacteroides_dorei	Bacteroides_ovatus	0.545865
Bacteroides_dorei	Coprobacter_fastidiosus	0.854135
Bacteroides_dorei	Bilophila_wadsworthia	0.718315
Bacteroides_dorei	Clostridium_polysaccharolyticum	-0.625564
Bacteroides_dorei	Odoribacter_laneus	0.575704
Bacteroides_dorei	Bacteroides_vulgatus	0.794347
Bacteroides_dorei	Blautia_hydrogenotrophica	-0.553383
Bacteroides_dorei	Clostridium_saccharogumia	-0.589474
Bacteroides_dorei	Aestuariispira_insulae	0.567563
Bacteroides_dorei	Holdemania_filiformis	-0.718797
Bacteroides_dorei	Butyricimonas_paravirosa	0.586482
Bacteroides_dorei	Butyricimonas_faecihominis	0.534455
Bacteroides_dorei	Alistipes_onderdonkii	0.627146
Bacteroides_dorei	Phacovirus_DMPhV	-0.528803
Bacteroides_dorei	Equine_infectious_anemia_virus	-0.583016
Megamonas_rupellensis	Megamonas_funiformis	0.946356
Megamonas_rupellensis	Barnesiella_intestinihominis	-0.587567
Megamonas_rupellensis	Bifidobacterium_saeculare	-0.610544
Megamonas_rupellensis	Desulfovibrio_simplex	-0.555255
Megamonas_rupellensis	Lactobacillus_aviarius	-0.676041
Megamonas_rupellensis	Bacteroides_eggerthii	-0.533366
Megamonas_rupellensis	Lachnospira_multipara	-0.522856
Megamonas_rupellensis	Akkermansia_muciniphila	-0.528659
Megamonas_rupellensis	Enterorhabdus_caecimuris	0.530985
Megamonas_rupellensis	Lactobacillus_equi	-0.533366
Megamonas_rupellensis	Lactobacillus_ingluviei	-0.612558
Megamonas_rupellensis	Sicinivirus_A	0.50415
Megamonas_rupellensis	Qubevirus_faecium	0.740315
Megamonas_rupellensis	Chicken_picornavirus_5	-0.532311
Megamonas_rupellensis	Sicinivirus_UCC1	0.61368
Megamonas_rupellensis	Chicken_proventriculitis_virus	-0.518603
Megamonas_rupellensis	Beihai_tombus-like_virus_15	0.558692
Megamonas_rupellensis	Rotavirus_G	0.83128
Megamonas_rupellensis	Porcine_picobirnavirus	-0.575605
Megamonas_rupellensis	Orthoavulavirus_javaense	0.679979
Megamonas_rupellensis	Parabacteroides_phage_YZ-2015a	0.550034
Megamonas_rupellensis	Rabbit_picobirnavirus_7	0.610516
Megamonas_rupellensis	Picobirnavirus_GIPBVturkeyUSAMN-12011	-0.533927
Megamonas_rupellensis	Drosophila_A_virus	0.500886
Megamonas_rupellensis	Chicken_picornavirus_UCC13	-0.533366
Megamonas_rupellensis	Reticuloendotheliosis_virus	0.517321
Megamonas_rupellensis	Enterogokushovirus_EC6098	0.504825
Megamonas_rupellensis	Chicken_proventricular_necrosis_virus	-0.533366
Clostridium_lactatifermentans	Alistipes_shahii	-0.524097
Clostridium_lactatifermentans	Eubacterium_coprostanoligenes	-0.56391
Clostridium_lactatifermentans	Flavonifractor_plautii	0.833083
Clostridium_lactatifermentans	Barnesiella_viscericola	0.518505
Clostridium_lactatifermentans	Oscillibacter_ruminantium	0.801504
Clostridium_lactatifermentans	Blautia_glucerasea	-0.742857
Clostridium_lactatifermentans	Intestinimonas_butyriciproducens	0.566917
Clostridium_lactatifermentans	Clostridium_amygdalinum	0.744361
Clostridium_lactatifermentans	Bifidobacterium_saeculare	-0.548772
Clostridium_lactatifermentans	Enterococcus_cecorum	-0.595713
Clostridium_lactatifermentans	Desulfovibrio_simplex	-0.589285
Clostridium_lactatifermentans	Alistipes_indistinctus	-0.555848
Clostridium_lactatifermentans	Hydrogenoanaerobacterium_saccharovorans	0.661903
Clostridium_lactatifermentans	Bacteroides_eggerthii	-0.579704
Clostridium_lactatifermentans	Lachnospira_multipara	0.510621
Clostridium_lactatifermentans	Lactobacillus_equi	-0.535608
Clostridium_lactatifermentans	Lactobacillus_ingluviei	-0.559301
Clostridium_lactatifermentans	Gordonibacter_urolithinfaciens	-0.547068
Clostridium_lactatifermentans	Faecalitalea_cylindroides	-0.570867
Clostridium_lactatifermentans	Phacovirus_sp.	0.559398
Clostridium_lactatifermentans	Phacovirus_Pf-CHK1PhV	0.578947
Clostridium_lactatifermentans	Avian_nephritis_virus	0.512782
Clostridium_lactatifermentans	Chicken_picornavirus_5	-0.629918
Clostridium_lactatifermentans	Chicken_picobirnavirus	-0.636208
Clostridium_lactatifermentans	Chicken_astrovirus	0.522753
Clostridium_lactatifermentans	Chicken_proventriculitis_virus	-0.523743
Clostridium_lactatifermentans	Orivirus_A	-0.593483
Clostridium_lactatifermentans	Phacovirus_VGPhV	0.559398
Clostridium_lactatifermentans	Rotavirus_D	-0.517113
Clostridium_lactatifermentans	Astrovirus_HK-2014	0.622556
Clostridium_lactatifermentans	Marmot_picobirnavirus	-0.558104
Clostridium_lactatifermentans	Aveparvovirus_galliform1	0.544827
Clostridium_lactatifermentans	Sapelovirus_B	0.589559
Clostridium_lactatifermentans	Lysoka_partiti-like_virus	-0.509438
Clostridium_lactatifermentans	Chicken_picornavirus_4	-0.517798
Clostridium_lactatifermentans	Avian_astrovirus	0.529305
Clostridium_lactatifermentans	Picornavirus_chickenCHK175USA2010	-0.672265
Clostridium_lactatifermentans	Benes_partiti-like_virus	-0.573455
Clostridium_lactatifermentans	Picobirnavirus_GIPBVturkeyUSAMN-12011	-0.631273
Clostridium_lactatifermentans	Eimeria_brunetti_RNA_virus_1	0.514955
Clostridium_lactatifermentans	Microviridae_sp.	-0.61486
Clostridium_lactatifermentans	Chicken_picornavirus_UCC13	-0.552816
Clostridium_lactatifermentans	Equine_infectious_anemia_virus	0.511869
Clostridium_lactatifermentans	Human_gut_gokushovirus	-0.520988
Alistipes_shahii	Collinsella_tanakaei	0.531361
Alistipes_shahii	Blautia_glucerasea	0.531627
Alistipes_shahii	Intestinimonas_butyriciproducens	-0.506025
Alistipes_shahii	Clostridium_spiroforme	-0.528615
Alistipes_shahii	Clostridium_amygdalinum	-0.813254
Alistipes_shahii	Bifidobacterium_saeculare	0.655434
Alistipes_shahii	Enterococcus_cecorum	0.515255
Alistipes_shahii	Bacteroides_clarus	0.51746
Alistipes_shahii	Desulfovibrio_simplex	0.570391
Alistipes_shahii	Alistipes_indistinctus	0.586064
Alistipes_shahii	Bacteroides_eggerthii	0.689369
Alistipes_shahii	Lactobacillus_equi	0.592426
Alistipes_shahii	Lactobacillus_ingluviei	0.738281
Alistipes_shahii	Faecalitalea_cylindroides	0.542656
Alistipes_shahii	Bacteroides_plebeius	0.51843
Alistipes_shahii	Gallibacterium_anatis	0.521773
Alistipes_shahii	Avian_coronavirus	0.631025
Alistipes_shahii	Sicinivirus_A	-0.519579
Alistipes_shahii	Sicinivirus_sp.	-0.521085
Alistipes_shahii	Phacovirus_sp.	-0.593374
Alistipes_shahii	Chicken_picornavirus_UCCPhV	-0.575302
Alistipes_shahii	Phacovirus_Pf-CHK1PhV	-0.778615
Alistipes_shahii	Chicken_picornavirus_1	-0.746989
Alistipes_shahii	Megrivirus_C	0.601576
Alistipes_shahii	Sicinivirus_10	-0.773041
Alistipes_shahii	Avian_nephritis_virus	-0.606928
Alistipes_shahii	Chicken_picornavirus_5	0.560182
Alistipes_shahii	Chicken_picobirnavirus	0.57026
Alistipes_shahii	Chicken_astrovirus	-0.506215
Alistipes_shahii	Avastrovirus_2	-0.599398
Alistipes_shahii	Chicken_proventriculitis_virus	0.684214
Alistipes_shahii	Astrovirus_HK-2014	-0.707832
Alistipes_shahii	Marmot_picobirnavirus	0.628418
Alistipes_shahii	Aveparvovirus_galliform1	-0.541399
Alistipes_shahii	Quail_picornavirus_QPV1HUN2010	-0.553289
Alistipes_shahii	Avian_nephritis_virus_3	-0.589571
Alistipes_shahii	Cryptosporidium_parvum_virus_1	0.574465
Alistipes_shahii	Tremovirus_A	-0.521305
Alistipes_shahii	Avian_astrovirus	-0.522676
Alistipes_shahii	Picobirnavirus_GIPBVturkeyUSAMN-12011	0.663789
Alistipes_shahii	Eimeria_brunetti_RNA_virus_1	-0.714461
Alistipes_shahii	Microviridae_sp.	0.519471
Alistipes_shahii	Chicken_picornavirus_UCC13	0.605352
Alistipes_shahii	Chicken_proventricular_necrosis_virus	0.650592
Eubacterium_coprostanoligenes	Flavonifractor_plautii	-0.66015
Eubacterium_coprostanoligenes	Barnesiella_viscericola	-0.566241
Eubacterium_coprostanoligenes	Bacteroides_fragilis	-0.705263
Eubacterium_coprostanoligenes	Helicobacter_pullorum	-0.57594
Eubacterium_coprostanoligenes	Blautia_glucerasea	0.598496
Eubacterium_coprostanoligenes	Faecalicoccus_acidiformans	0.678195
Eubacterium_coprostanoligenes	Eggerthella_lenta	0.63609
Eubacterium_coprostanoligenes	Bacteroides_ovatus	-0.634586
Eubacterium_coprostanoligenes	Coprococcus_comes	0.804511
Eubacterium_coprostanoligenes	Anaerotruncus_colihominis	-0.682707
Eubacterium_coprostanoligenes	Bacteroides_vulgatus	-0.626873
Eubacterium_coprostanoligenes	Clostridium_saccharogumia	0.589474
Eubacterium_coprostanoligenes	Aestuariispira_insulae	-0.791435
Eubacterium_coprostanoligenes	Olsenella_uli	0.517798
Eubacterium_coprostanoligenes	Lachnospira_multipara	-0.563653
Eubacterium_coprostanoligenes	Christensenella_minuta	0.660399
Eubacterium_coprostanoligenes	Lactobacillus_equi	0.593686
Eubacterium_coprostanoligenes	Lactobacillus_ingluviei	0.50594
Eubacterium_coprostanoligenes	Gordonibacter_urolithinfaciens	0.632202
Eubacterium_coprostanoligenes	Faecalitalea_cylindroides	0.575704
Eubacterium_coprostanoligenes	Bacteroides_plebeius	0.503137
Eubacterium_coprostanoligenes	Avian_nephritis_virus	-0.699248
Eubacterium_coprostanoligenes	Chicken_astrovirus	-0.756675
Eubacterium_coprostanoligenes	Avastrovirus_2	-0.589474
Eubacterium_coprostanoligenes	Astrovirus_HK-2014	-0.619549
Eubacterium_coprostanoligenes	Melegrivirus_A	0.563604
Eubacterium_coprostanoligenes	Lysoka_partiti-like_virus	0.684533
Eubacterium_coprostanoligenes	Avibirnavirus_gumboroense	0.627994
Eubacterium_coprostanoligenes	Tremovirus_A	-0.502875
Eubacterium_coprostanoligenes	Avian_astrovirus	-0.644251
Eubacterium_coprostanoligenes	Picobirnavirus_GIPBVturkeyUSAMN-12011	0.529305
Eubacterium_coprostanoligenes	Chicken_picornavirus_UCC13	0.589384
Butyricicoccus_pullicaecorum	Escherichia	0.6
Butyricicoccus_pullicaecorum	Campylobacter_jejuni	-0.760545
Butyricicoccus_pullicaecorum	Alistipes_finegoldii	-0.56391
Butyricicoccus_pullicaecorum	Clostridium_leptum	0.606015
Butyricicoccus_pullicaecorum	Barnesiella_intestinihominis	0.500399
Butyricicoccus_pullicaecorum	Lactobacillus_salivarius	0.645113
Butyricicoccus_pullicaecorum	Clostridium_polysaccharolyticum	0.76391
Butyricicoccus_pullicaecorum	Bacteroides_vulgatus	-0.705232
Butyricicoccus_pullicaecorum	Clostridium_colinum	0.512782
Butyricicoccus_pullicaecorum	Clostridium_saccharogumia	0.678195
Butyricicoccus_pullicaecorum	Butyricimonas_paravirosa	-0.780399
Butyricicoccus_pullicaecorum	Aveparvovirus_galliform1	0.609324
Butyricicoccus_pullicaecorum	Avastrovirus_1	-0.608099
Butyricicoccus_pullicaecorum	Parabacteroides_phage_YZ-2015a	-0.538834
Butyricicoccus_pullicaecorum	Circoviridae_sp.	-0.52175
Butyricicoccus_pullicaecorum	Eimeria_brunetti_RNA_virus_1	0.56637
Escherichia	Campylobacter_jejuni	-0.55466
Escherichia	Alistipes_finegoldii	-0.691729
Escherichia	Bacteroides_uniformis	-0.542524
Escherichia	Clostridium_polysaccharolyticum	0.556391
Escherichia	Alistipes_onderdonkii	-0.571135
Escherichia	Brachybacterium_conglomeratum	0.544212
Alistipes_timonensis	Coprobacter_fastidiosus	0.543814
Alistipes_timonensis	Lactobacillus_aviarius	-0.519444
Alistipes_timonensis	Butyricimonas_faecihominis	0.662406
Alistipes_timonensis	Alistipes_onderdonkii	0.578991
Alistipes_timonensis	Picornavirus_chickenCHK1USA2010	-0.735615
Alistipes_timonensis	Bavaria_virus	0.724333
Alistipes_timonensis	Sicinivirus_UCC1	0.569387
Alistipes_timonensis	Turkey_picornavirus	-0.717563
Alistipes_timonensis	RD114_retrovirus	0.563783
Alistipes_timonensis	Orivirus_A	0.686959
Alistipes_timonensis	Beihai_tombus-like_virus_15	0.551216
Alistipes_timonensis	Chicken_calicivirus_UCC1	0.729539
Alistipes_timonensis	Calicivirus_chickenV0021Bayern2004	0.58815
Alistipes_timonensis	Feline_endogenous_virus	0.563783
Alistipes_timonensis	Calicivirus_chickenV0027Bayern2004	0.601748
Alistipes_timonensis	Phacovirus_DMPhV	-0.513086
Alistipes_timonensis	Riboviria_sp.	0.571081
Alistipes_timonensis	Baboon_endogenous_virus	0.563783
Alistipes_timonensis	Mason-Pfizer_monkey_virus	0.54872
Alistipes_timonensis	Kirsten_murine_sarcoma_virus	0.570239
Alistipes_timonensis	Pigeon-dominant_Coronavirus	-0.661137
Alistipes_timonensis	Enterogokushovirus_EC6098	0.542043
Flavonifractor_plautii	Barnesiella_viscericola	0.544842
Flavonifractor_plautii	Oscillibacter_ruminantium	0.747368
Flavonifractor_plautii	Blautia_glucerasea	-0.732331
Flavonifractor_plautii	Clostridium_amygdalinum	0.625564
Flavonifractor_plautii	Coprococcus_comes	-0.601504
Flavonifractor_plautii	Anaerotruncus_colihominis	0.613534
Flavonifractor_plautii	Enterococcus_cecorum	-0.710041
Flavonifractor_plautii	Desulfovibrio_simplex	-0.538258
Flavonifractor_plautii	Alistipes_indistinctus	-0.548326
Flavonifractor_plautii	Aestuariispira_insulae	0.523419
Flavonifractor_plautii	Hydrogenoanaerobacterium_saccharovorans	0.772471
Flavonifractor_plautii	Lachnospira_multipara	0.572744
Flavonifractor_plautii	Gordonibacter_pamelaeae	-0.50214
Flavonifractor_plautii	Lactobacillus_equi	-0.536683
Flavonifractor_plautii	Lactobacillus_ingluviei	-0.549419
Flavonifractor_plautii	Gordonibacter_urolithinfaciens	-0.666886
Flavonifractor_plautii	Bacteroides_plebeius	-0.503137
Flavonifractor_plautii	Phacovirus_sp.	0.521805
Flavonifractor_plautii	Phacovirus_Pf-CHK1PhV	0.508271
Flavonifractor_plautii	Gallivirus_A	-0.520301
Flavonifractor_plautii	Gallivirus_Pf-CHK1GV	-0.509774
Flavonifractor_plautii	Avian_nephritis_virus	0.572932
Flavonifractor_plautii	Chicken_picornavirus_5	-0.629918
Flavonifractor_plautii	Chicken_picobirnavirus	-0.612127
Flavonifractor_plautii	Chicken_astrovirus	0.567883
Flavonifractor_plautii	Avastrovirus_2	0.557895
Flavonifractor_plautii	Chicken_proventriculitis_virus	-0.540429
Flavonifractor_plautii	Orivirus_A	-0.588046
Flavonifractor_plautii	Phacovirus_VGPhV	0.6
Flavonifractor_plautii	Astrovirus_HK-2014	0.744361
Flavonifractor_plautii	Marmot_picobirnavirus	-0.595941
Flavonifractor_plautii	Picornavirales_sp.	0.507653
Flavonifractor_plautii	Aveparvovirus_galliform1	0.642421
Flavonifractor_plautii	Chicken_gallivirus_1	-0.556196
Flavonifractor_plautii	Turkey_picobirnavirus	-0.525703
Flavonifractor_plautii	Sapelovirus_B	0.647959
Flavonifractor_plautii	Lysoka_partiti-like_virus	-0.541891
Flavonifractor_plautii	Avian_astrovirus	0.539502
Flavonifractor_plautii	Picornavirus_chickenCHK175USA2010	-0.702261
Flavonifractor_plautii	Caudoviricetes_sp.	-0.513428
Flavonifractor_plautii	Benes_partiti-like_virus	-0.610508
Flavonifractor_plautii	Picobirnavirus_GIPBVturkeyUSAMN-12011	-0.688746
Flavonifractor_plautii	Eimeria_brunetti_RNA_virus_1	0.600915
Flavonifractor_plautii	Microviridae_sp.	-0.581752
Flavonifractor_plautii	Chicken_picornavirus_UCC13	-0.53023
Barnesiella_viscericola	Blautia_glucerasea	-0.714385
Barnesiella_viscericola	Faecalicoccus_acidiformans	-0.551426
Barnesiella_viscericola	Coprococcus_comes	-0.523443
Barnesiella_viscericola	Enterococcus_cecorum	-0.54834
Barnesiella_viscericola	Aestuariispira_insulae	0.505642
Barnesiella_viscericola	Hydrogenoanaerobacterium_saccharovorans	0.61256
Barnesiella_viscericola	Lachnospira_multipara	0.525766
Barnesiella_viscericola	Enterorhabdus_caecimuris	-0.602097
Barnesiella_viscericola	Gordonibacter_urolithinfaciens	-0.60401
Barnesiella_viscericola	Phacovirus_sp.	0.571179
Barnesiella_viscericola	Chicken_picornavirus_UCCPhV	0.68311
Barnesiella_viscericola	Phacovirus_Pf-CHK1PhV	0.600808
Barnesiella_viscericola	Chicken_picornavirus_1	0.500399
Barnesiella_viscericola	Sicinivirus_10	0.539645
Barnesiella_viscericola	Chicken_picornavirus_HK-2014	0.528382
Barnesiella_viscericola	Phacovirus_VGPhV	0.569533
Barnesiella_viscericola	Rotavirus_D	-0.505642
Barnesiella_viscericola	Picornavirales_sp.	0.597107
Barnesiella_viscericola	Aveparvovirus_galliform1	0.575015
Barnesiella_viscericola	Tremovirus_A	0.656688
Barnesiella_viscericola	Avian_astrovirus	0.695064
Barnesiella_viscericola	Campylobacter_phage_DA10	0.594882
Barnesiella_viscericola	Eimeria_brunetti_RNA_virus_1	0.588304
Clostridium_sporosphaeroides	Bacteroides_fragilis	-0.58797
Clostridium_sporosphaeroides	Clostridium_leptum	0.81203
Clostridium_sporosphaeroides	Intestinimonas_butyriciproducens	0.702256
Clostridium_sporosphaeroides	Faecalicoccus_acidiformans	0.663158
Clostridium_sporosphaeroides	Bacteroides_ovatus	-0.687218
Clostridium_sporosphaeroides	Coprobacter_fastidiosus	-0.565414
Clostridium_sporosphaeroides	Clostridium_polysaccharolyticum	0.622556
Clostridium_sporosphaeroides	Bacteroides_vulgatus	-0.500884
Clostridium_sporosphaeroides	Clostridium_saccharogumia	0.584962
Clostridium_sporosphaeroides	Holdemania_filiformis	0.569925
Clostridium_sporosphaeroides	Christensenella_minuta	0.676194
Clostridium_sporosphaeroides	Alistipes_onderdonkii	-0.50579
Clostridium_sporosphaeroides	Posavirus_1	-0.516248
Clostridium_sporosphaeroides	Picornavirales_Tottori-HG1	-0.619245
Clostridium_sporosphaeroides	Picornavirales_Tottori-HG2	-0.605516
Clostridium_sporosphaeroides	Picobirnavirus_wolfPRT1892015	-0.520988
Clostridium_sporosphaeroides	Chicken_stool-associated_circular_virus	-0.520988
Clostridium_sporosphaeroides	Circular_ssDNA_virus_sp.	-0.518102
Clostridium_sporosphaeroides	Pythium_polare_bunya-like_RNA_virus_1	-0.520988
Clostridium_sporosphaeroides	Chimpanzee_faeces_associated_circular_DNA_virus_1	-0.518102
Clostridium_sporosphaeroides	Camula_virus	-0.520988
Clostridium_sporosphaeroides	Macaque_picobirnavirus_28	-0.518102
Clostridium_sporosphaeroides	Macaque_picobirnavirus_2	-0.518102
Clostridium_sporosphaeroides	Avastrovirus_1	-0.587705
Clostridium_sporosphaeroides	Rodent_stool-associated_circular_genome_virus	-0.520988
Clostridium_sporosphaeroides	Cressdnaviricota_sp.	-0.518102
Clostridium_sporosphaeroides	Pink-eared_duck_picobirnavirus	-0.518102
Clostridium_sporosphaeroides	Macaque_picobirnavirus_25	-0.621664
Clostridium_sporosphaeroides	Bovine_picobirnavirus	-0.510393
Clostridium_sporosphaeroides	Chicken_associated_smacovirus	-0.520988
Clostridium_sporosphaeroides	Riboviria_sp.	-0.575704
Clostridium_sporosphaeroides	Avisivirus_Pf-CHK1AsV	-0.570024
Clostridium_sporosphaeroides	Chicken_virus_mg4_657	-0.518102
Clostridium_sporosphaeroides	Mongoose_picobirnavirus	-0.510393
Clostridium_sporosphaeroides	Kumba_picobirna-like_virus	-0.520988
Clostridium_sporosphaeroides	Macaque_picobirnavirus_12	-0.518102
Clostridium_sporosphaeroides	Tasmanian_devil-associated_picobirnavirus_1	-0.520988
Clostridium_sporosphaeroides	Human_smacovirus_1	-0.520988
Clostridium_sporosphaeroides	Chicken_virus_mg8_273	-0.520988
Clostridium_sporosphaeroides	Lysoka_picobirna-like_virus	-0.518102
Clostridium_sporosphaeroides	Kristianstad_virus	-0.518102
Clostridium_sporosphaeroides	Microtus_picobirnavirus_V-111USA2008	-0.518102
Clostridium_sporosphaeroides	Mischke_partiti-like_virus	-0.518102
Clostridium_sporosphaeroides	Picobirnavirus_dogKNA2015	-0.520988
Clostridium_sporosphaeroides	Wuhan_pillworm_virus_4	-0.518102
Clostridium_sporosphaeroides	Chicken_stool_associated_circular_virus_1	-0.520988
Bacteroides_fragilis	Helicobacter_pullorum	0.819549
Bacteroides_fragilis	Gemmiger_formicilis	-0.517293
Bacteroides_fragilis	Clostridium_leptum	-0.506767
Bacteroides_fragilis	Faecalicoccus_acidiformans	-0.738346
Bacteroides_fragilis	Eggerthella_lenta	-0.571429
Bacteroides_fragilis	Bacteroides_ovatus	0.842105
Bacteroides_fragilis	Coprobacter_fastidiosus	0.544361
Bacteroides_fragilis	Coprococcus_comes	-0.535338
Bacteroides_fragilis	Anaerotruncus_colihominis	0.747368
Bacteroides_fragilis	Bacteroides_vulgatus	0.81893
Bacteroides_fragilis	Blautia_hydrogenotrophica	-0.526316
Bacteroides_fragilis	Clostridium_saccharogumia	-0.66015
Bacteroides_fragilis	Aestuariispira_insulae	0.849768
Bacteroides_fragilis	Holdemania_filiformis	-0.560902
Bacteroides_fragilis	Anaeroplasma_abactoclasticum	0.758925
Bacteroides_fragilis	Christensenella_minuta	-0.588191
Bacteroides_fragilis	Butyricimonas_faecihominis	0.5045
Bacteroides_fragilis	Avian_nephritis_virus	0.505263
Helicobacter_pullorum	Gemmiger_formicilis	-0.700752
Helicobacter_pullorum	Faecalicoccus_acidiformans	-0.581955
Helicobacter_pullorum	Eggerthella_lenta	-0.625564
Helicobacter_pullorum	Bacteroides_ovatus	0.766917
Helicobacter_pullorum	Coprobacter_fastidiosus	0.670677
Helicobacter_pullorum	Coprococcus_comes	-0.6
Helicobacter_pullorum	Anaerotruncus_colihominis	0.649624
Helicobacter_pullorum	Bilophila_wadsworthia	0.509966
Helicobacter_pullorum	Bacteroides_vulgatus	0.74518
Helicobacter_pullorum	Blautia_hydrogenotrophica	-0.688722
Helicobacter_pullorum	Clostridium_saccharogumia	-0.615038
Helicobacter_pullorum	Aestuariispira_insulae	0.796165
Helicobacter_pullorum	Holdemania_filiformis	-0.628571
Helicobacter_pullorum	Anaeroplasma_abactoclasticum	0.647677
Helicobacter_pullorum	Butyricimonas_virosa	0.563157
Helicobacter_pullorum	Butyricimonas_faecihominis	0.569139
Helicobacter_pullorum	Gordonibacter_pamelaeae	-0.537953
Helicobacter_pullorum	Eubacterium_callanderi	-0.605746
Helicobacter_pullorum	Tortoise_microvirus_100	0.626496
Campylobacter_jejuni	Megamonas_funiformis	0.544464
Campylobacter_jejuni	Lactobacillus_salivarius	-0.679113
Campylobacter_jejuni	Bilophila_wadsworthia	0.660924
Campylobacter_jejuni	Clostridium_polysaccharolyticum	-0.785128
Campylobacter_jejuni	Holdemania_filiformis	-0.55005
Campylobacter_jejuni	Butyricimonas_paravirosa	0.831194
Campylobacter_jejuni	Sicinivirus_sp.	-0.511639
Campylobacter_jejuni	Phacovirus_sp.	-0.573097
Campylobacter_jejuni	Phacovirus_Pf-CHK1PhV	-0.548514
Campylobacter_jejuni	Chicken_picornavirus_1	-0.530077
Campylobacter_jejuni	Sicinivirus_10	-0.562884
Campylobacter_jejuni	Rotavirus_A	0.539284
Campylobacter_jejuni	Aveparvovirus_galliform1	-0.737028
Campylobacter_jejuni	Avastrovirus_1	0.646892
Campylobacter_jejuni	Cryptosporidium_parvum_virus_1	0.691958
Campylobacter_jejuni	Parabacteroides_phage_YZ-2015a	0.624176
Campylobacter_jejuni	Circoviridae_sp.	0.609827
Campylobacter_jejuni	UR2_sarcoma_virus	0.596361
Campylobacter_jejuni	Eimeria_brunetti_RNA_virus_1	-0.70345
Campylobacter_jejuni	Equine_infectious_anemia_virus	-0.500785
Campylobacter_jejuni	Avian_orthoreovirus	0.55362
Collinsella_tanakaei	Barnesiella_intestinihominis	0.777187
Collinsella_tanakaei	Clostridium_spiroforme	-0.537553
Collinsella_tanakaei	Clostridium_amygdalinum	-0.55775
Collinsella_tanakaei	Bifidobacterium_saeculare	0.83034
Collinsella_tanakaei	Desulfovibrio_simplex	0.602023
Collinsella_tanakaei	Bacteroides_eggerthii	0.70671
Collinsella_tanakaei	Akkermansia_muciniphila	0.774793
Collinsella_tanakaei	Lactobacillus_equi	0.664485
Collinsella_tanakaei	Lactobacillus_ingluviei	0.775906
Collinsella_tanakaei	Faecalitalea_cylindroides	0.617286
Collinsella_tanakaei	Bacteroides_plebeius	0.517321
Collinsella_tanakaei	Avian_coronavirus	0.722434
Collinsella_tanakaei	Picornavirus_chickenCHK1USA2010	0.586492
Collinsella_tanakaei	Sicinivirus_A	-0.618341
Collinsella_tanakaei	Sicinivirus_sp.	-0.50182
Collinsella_tanakaei	Chicken_picornavirus_1	-0.634654
Collinsella_tanakaei	Megrivirus_C	0.557878
Collinsella_tanakaei	Bavaria_virus	-0.585715
Collinsella_tanakaei	Sicinivirus_10	-0.600663
Collinsella_tanakaei	Avian_nephritis_virus	-0.601251
Collinsella_tanakaei	Qubevirus_faecium	-0.506632
Collinsella_tanakaei	Chicken_picornavirus_5	0.649893
Collinsella_tanakaei	Turkey_picornavirus	0.548428
Collinsella_tanakaei	RD114_retrovirus	-0.533366
Collinsella_tanakaei	Avastrovirus_2	-0.616011
Collinsella_tanakaei	Chicken_proventriculitis_virus	0.640233
Collinsella_tanakaei	Calicivirus_chickenV0021Bayern2004	-0.613661
Collinsella_tanakaei	Marmot_picobirnavirus	0.553805
Collinsella_tanakaei	Feline_endogenous_virus	-0.533366
Collinsella_tanakaei	Calicivirus_chickenV0027Bayern2004	-0.596862
Collinsella_tanakaei	Melegrivirus_A	0.547335
Collinsella_tanakaei	Avian_nephritis_virus_3	-0.71035
Collinsella_tanakaei	Chicken_picornavirus_4	0.608474
Collinsella_tanakaei	Cryptosporidium_parvum_virus_1	0.548215
Collinsella_tanakaei	Benes_partiti-like_virus	0.521373
Collinsella_tanakaei	Baboon_endogenous_virus	-0.533366
Collinsella_tanakaei	Mason-Pfizer_monkey_virus	-0.533366
Collinsella_tanakaei	Picobirnavirus_GIPBVturkeyUSAMN-12011	0.550208
Collinsella_tanakaei	Microviridae_phi-CA82	0.621149
Collinsella_tanakaei	Kirsten_murine_sarcoma_virus	-0.533366
Collinsella_tanakaei	Drosophila_A_virus	-0.551166
Collinsella_tanakaei	Chicken_picornavirus_UCC13	0.655596
Collinsella_tanakaei	Chicken_microvirus_mg7_10	0.524758
Collinsella_tanakaei	Duck-dominant_coronavirus	0.506632
Collinsella_tanakaei	Calicivirus_chickenV0013Bayern2004	-0.533366
Collinsella_tanakaei	Chicken_proventricular_necrosis_virus	0.65893
Oscillibacter_ruminantium	Blautia_glucerasea	-0.532331
Oscillibacter_ruminantium	Clostridium_amygdalinum	0.584962
Oscillibacter_ruminantium	Enterococcus_cecorum	-0.653629
Oscillibacter_ruminantium	Clostridium_methylpentosum	0.560902
Oscillibacter_ruminantium	Acetanaerobacterium_elongatum	0.550583
Oscillibacter_ruminantium	Hydrogenoanaerobacterium_saccharovorans	0.649868
Oscillibacter_ruminantium	Gordonibacter_urolithinfaciens	-0.517113
Oscillibacter_ruminantium	Chicken_picobirnavirus	-0.526678
Oscillibacter_ruminantium	Astrovirus_HK-2014	0.524812
Oscillibacter_ruminantium	Aveparvovirus_galliform1	0.540584
Oscillibacter_ruminantium	Sapelovirus_B	0.578435
Oscillibacter_ruminantium	Picornavirus_chickenCHK175USA2010	-0.605215
Oscillibacter_ruminantium	Microviridae_sp.	-0.603824
Gemmiger_formicilis	Eggerthella_lenta	0.61203
Gemmiger_formicilis	Bacteroides_ovatus	-0.622556
Gemmiger_formicilis	Odoribacter_laneus	-0.561191
Gemmiger_formicilis	Bacteroides_vulgatus	-0.674503
Gemmiger_formicilis	Aestuariispira_insulae	-0.635355
Gemmiger_formicilis	Butyricimonas_virosa	-0.648313
Gemmiger_formicilis	Butyricimonas_faecihominis	-0.662157
Gemmiger_formicilis	Gordonibacter_pamelaeae	0.574527
Gemmiger_formicilis	Dickeya_phage_phiDP23.1	-0.596992
Gemmiger_formicilis	Tortoise_microvirus_100	-0.656141
Blautia_glucerasea	Clostridium_amygdalinum	-0.595489
Blautia_glucerasea	Coprococcus_comes	0.586466
Blautia_glucerasea	Anaerotruncus_colihominis	-0.667669
Blautia_glucerasea	Enterococcus_cecorum	0.646108
Blautia_glucerasea	Desulfovibrio_simplex	0.502045
Blautia_glucerasea	Aestuariispira_insulae	-0.521843
Blautia_glucerasea	Hydrogenoanaerobacterium_saccharovorans	-0.670177
Blautia_glucerasea	Lactobacillus_ingluviei	0.577087
Blautia_glucerasea	Gordonibacter_urolithinfaciens	0.588058
Blautia_glucerasea	Bacteroides_plebeius	0.510393
Blautia_glucerasea	Phacovirus_sp.	-0.509774
Blautia_glucerasea	Chicken_picornavirus_UCCPhV	-0.55188
Blautia_glucerasea	Phacovirus_Pf-CHK1PhV	-0.593985
Blautia_glucerasea	Avian_nephritis_virus	-0.566917
Blautia_glucerasea	Chicken_astrovirus	-0.610756
Blautia_glucerasea	Avastrovirus_2	-0.619549
Blautia_glucerasea	Chicken_proventriculitis_virus	0.520963
Blautia_glucerasea	Orivirus_A	0.595037
Blautia_glucerasea	Phacovirus_VGPhV	-0.508271
Blautia_glucerasea	Astrovirus_HK-2014	-0.664662
Blautia_glucerasea	Aveparvovirus_galliform1	-0.544827
Blautia_glucerasea	Quail_picornavirus_QPV1HUN2010	-0.52906
Blautia_glucerasea	Sapelovirus_B	-0.553407
Blautia_glucerasea	Tremovirus_A	-0.564632
Blautia_glucerasea	Avian_astrovirus	-0.688746
Blautia_glucerasea	Picobirnavirus_GIPBVturkeyUSAMN-12011	0.634981
Blautia_glucerasea	Microviridae_sp.	0.542338
Clostridium_leptum	Intestinimonas_butyriciproducens	0.566917
Clostridium_leptum	Faecalicoccus_acidiformans	0.571429
Clostridium_leptum	Clostridium_spiroforme	0.618045
Clostridium_leptum	Coprococcus_comes	0.518797
Clostridium_leptum	Lactobacillus_salivarius	0.512782
Clostridium_leptum	Clostridium_polysaccharolyticum	0.702256
Clostridium_leptum	Bacteroides_vulgatus	-0.625337
Clostridium_leptum	Clostridium_saccharogumia	0.548872
Clostridium_leptum	Aestuariispira_insulae	-0.600671
Clostridium_leptum	Holdemania_filiformis	0.545865
Clostridium_leptum	Christensenella_minuta	0.721324
Clostridium_leptum	Avastrovirus_1	-0.598829
Intestinimonas_butyriciproducens	Bacteroides_uniformis	-0.607292
Intestinimonas_butyriciproducens	Clostridium_amygdalinum	0.569925
Intestinimonas_butyriciproducens	Bacteroides_clarus	-0.656079
Intestinimonas_butyriciproducens	Clostridium_polysaccharolyticum	0.538346
Intestinimonas_butyriciproducens	Alistipes_indistinctus	-0.588943
Intestinimonas_butyriciproducens	Alistipes_onderdonkii	-0.679761
Megamonas_funiformis	Barnesiella_intestinihominis	-0.612638
Megamonas_funiformis	Bifidobacterium_saeculare	-0.55396
Megamonas_funiformis	Lactobacillus_salivarius	-0.515536
Megamonas_funiformis	Bilophila_wadsworthia	0.544119
Megamonas_funiformis	Clostridium_polysaccharolyticum	-0.567563
Megamonas_funiformis	Lactobacillus_aviarius	-0.657539
Megamonas_funiformis	Akkermansia_muciniphila	-0.55396
Megamonas_funiformis	Lactobacillus_ingluviei	-0.569803
Megamonas_funiformis	Qubevirus_faecium	0.579228
Megamonas_funiformis	Sicinivirus_UCC1	0.589635
Megamonas_funiformis	Rotavirus_G	0.871304
Megamonas_funiformis	Avastrovirus_1	0.516057
Megamonas_funiformis	Orthoavulavirus_javaense	0.619074
Megamonas_funiformis	Parabacteroides_phage_YZ-2015a	0.712636
Megamonas_funiformis	Circoviridae_sp.	0.582235
Megamonas_funiformis	Rabbit_picobirnavirus_7	0.569803
Megamonas_funiformis	Picobirnavirus_GIPBVturkeyUSAMN-12011	-0.519945
Megamonas_funiformis	Avian_orthoreovirus	0.593433
Barnesiella_intestinihominis	Bifidobacterium_saeculare	0.861474
Barnesiella_intestinihominis	Desulfovibrio_simplex	0.536937
Barnesiella_intestinihominis	Clostridium_saccharogumia	0.637021
Barnesiella_intestinihominis	Lactobacillus_aviarius	0.505595
Barnesiella_intestinihominis	Bacteroides_eggerthii	0.722853
Barnesiella_intestinihominis	Christensenella_minuta	0.638907
Barnesiella_intestinihominis	Akkermansia_muciniphila	0.782328
Barnesiella_intestinihominis	Lactobacillus_equi	0.681648
Barnesiella_intestinihominis	Lactobacillus_ingluviei	0.800433
Barnesiella_intestinihominis	Faecalitalea_cylindroides	0.585166
Barnesiella_intestinihominis	Bacteroides_plebeius	0.505732
Barnesiella_intestinihominis	Gallibacterium_anatis	0.503936
Barnesiella_intestinihominis	Avian_coronavirus	0.506983
Barnesiella_intestinihominis	Sicinivirus_A	-0.534966
Barnesiella_intestinihominis	Avian_nephritis_virus	-0.711093
Barnesiella_intestinihominis	Chicken_picornavirus_5	0.585225
Barnesiella_intestinihominis	Chicken_astrovirus	-0.705597
Barnesiella_intestinihominis	Avastrovirus_2	-0.635375
Barnesiella_intestinihominis	Chicken_proventriculitis_virus	0.699123
Barnesiella_intestinihominis	Melegrivirus_A	0.613889
Barnesiella_intestinihominis	Rotavirus_G	-0.500241
Barnesiella_intestinihominis	Avian_nephritis_virus_3	-0.598122
Barnesiella_intestinihominis	Avastrovirus_1	-0.547934
Barnesiella_intestinihominis	Picobirnavirus_GIPBVturkeyUSAMN-12011	0.57736
Barnesiella_intestinihominis	Drosophila_A_virus	-0.547934
Barnesiella_intestinihominis	Chicken_picornavirus_UCC13	0.693421
Barnesiella_intestinihominis	Chicken_proventricular_necrosis_virus	0.762881
Faecalicoccus_acidiformans	Bacteroides_ovatus	-0.661654
Faecalicoccus_acidiformans	Coprobacter_fastidiosus	-0.503759
Faecalicoccus_acidiformans	Coprococcus_comes	0.535338
Faecalicoccus_acidiformans	Anaerotruncus_colihominis	-0.548872
Faecalicoccus_acidiformans	Bacteroides_vulgatus	-0.543905
Faecalicoccus_acidiformans	Aestuariispira_insulae	-0.649544
Faecalicoccus_acidiformans	Holdemania_filiformis	0.544361
Faecalicoccus_acidiformans	Christensenella_minuta	0.622791
Faecalicoccus_acidiformans	Reticuloendotheliosis_virus	0.512812
Clostridium_spiroforme	Clostridium_amygdalinum	0.622556
Clostridium_spiroforme	Bifidobacterium_saeculare	-0.567311
Clostridium_spiroforme	Desulfovibrio_simplex	-0.534966
Clostridium_spiroforme	Bacteroides_eggerthii	-0.624876
Clostridium_spiroforme	Lactobacillus_ingluviei	-0.531632
Clostridium_spiroforme	Lactobacillus_saerimneri	-0.690585
Clostridium_spiroforme	Faecalitalea_cylindroides	-0.570867
Clostridium_spiroforme	Picornavirus_chickenCHK1USA2010	-0.569925
Clostridium_spiroforme	Sicinivirus_sp.	0.568421
Clostridium_spiroforme	Chicken_picornavirus_1	0.547368
Clostridium_spiroforme	Megrivirus_C	-0.577022
Clostridium_spiroforme	Sicinivirus_10	0.569955
Clostridium_spiroforme	RD114_retrovirus	0.624876
Clostridium_spiroforme	Chicken_proventriculitis_virus	-0.647032
Clostridium_spiroforme	Beihai_tombus-like_virus_15	0.512383
Clostridium_spiroforme	Calicivirus_chickenV0021Bayern2004	0.50189
Clostridium_spiroforme	Feline_endogenous_virus	0.624876
Clostridium_spiroforme	Cryptosporidium_parvum_virus_1	-0.608948
Clostridium_spiroforme	UR2_sarcoma_virus	-0.518903
Clostridium_spiroforme	Baboon_endogenous_virus	0.624876
Clostridium_spiroforme	Mason-Pfizer_monkey_virus	0.614121
Clostridium_spiroforme	Microviridae_phi-CA82	-0.586157
Clostridium_spiroforme	Kirsten_murine_sarcoma_virus	0.637782
Clostridium_spiroforme	Porcine_type-C_oncovirus	0.520988
Bacteroides_uniformis	Coprobacter_fastidiosus	0.758925
Bacteroides_uniformis	Bilophila_wadsworthia	0.577792
Bacteroides_uniformis	Clostridium_polysaccharolyticum	-0.517379
Bacteroides_uniformis	Alistipes_indistinctus	0.686795
Bacteroides_uniformis	Holdemania_filiformis	-0.550144
Bacteroides_uniformis	Alistipes_onderdonkii	0.682006
Bacteroides_uniformis	Corynebacterium_stationis	0.516213
Bacteroides_uniformis	Equine_infectious_anemia_virus	-0.513733
Eggerthella_lenta	Bacteroides_ovatus	-0.630075
Eggerthella_lenta	Coprococcus_comes	0.681203
Eggerthella_lenta	Anaerotruncus_colihominis	-0.663158
Eggerthella_lenta	Bacteroides_vulgatus	-0.594608
Eggerthella_lenta	Aestuariispira_insulae	-0.668463
Eggerthella_lenta	Butyricimonas_virosa	-0.628229
Eggerthella_lenta	Gordonibacter_pamelaeae	0.626341
Eggerthella_lenta	Gordonibacter_urolithinfaciens	0.581752
Eggerthella_lenta	RD114_retrovirus	0.533457
Eggerthella_lenta	Feline_endogenous_virus	0.533457
Eggerthella_lenta	Lysoka_partiti-like_virus	0.534343
Eggerthella_lenta	Campylobacter_phage_DA10	-0.557574
Eggerthella_lenta	Baboon_endogenous_virus	0.533457
Eggerthella_lenta	Mason-Pfizer_monkey_virus	0.535608
Eggerthella_lenta	Kirsten_murine_sarcoma_virus	0.52055
Clostridium_amygdalinum	Bifidobacterium_saeculare	-0.647959
Clostridium_amygdalinum	Enterococcus_cecorum	-0.64686
Clostridium_amygdalinum	Bacteroides_clarus	-0.62426
Clostridium_amygdalinum	Desulfovibrio_simplex	-0.660066
Clostridium_amygdalinum	Alistipes_indistinctus	-0.650621
Clostridium_amygdalinum	Blautia_schinkii	0.511471
Clostridium_amygdalinum	Hydrogenoanaerobacterium_saccharovorans	0.643099
Clostridium_amygdalinum	Bacteroides_eggerthii	-0.661443
Clostridium_amygdalinum	Lactobacillus_equi	-0.634555
Clostridium_amygdalinum	Lactobacillus_ingluviei	-0.725312
Clostridium_amygdalinum	Lactobacillus_saerimneri	-0.577947
Clostridium_amygdalinum	Faecalitalea_cylindroides	-0.570867
Clostridium_amygdalinum	Bacteroides_plebeius	-0.595056
Clostridium_amygdalinum	Phacovirus_sp.	0.669173
Clostridium_amygdalinum	Phacovirus_Pf-CHK1PhV	0.756391
Clostridium_amygdalinum	Chicken_picornavirus_1	0.654135
Clostridium_amygdalinum	Megrivirus_C	-0.651121
Clostridium_amygdalinum	Sicinivirus_10	0.688061
Clostridium_amygdalinum	Chicken_picornavirus_5	-0.704026
Clostridium_amygdalinum	Chicken_picobirnavirus	-0.644753
Clostridium_amygdalinum	Chicken_proventriculitis_virus	-0.720263
Clostridium_amygdalinum	Phacovirus_VGPhV	0.508271
Clostridium_amygdalinum	Astrovirus_HK-2014	0.631579
Clostridium_amygdalinum	Marmot_picobirnavirus	-0.687382
Clostridium_amygdalinum	Aveparvovirus_galliform1	0.628843
Clostridium_amygdalinum	Melegrivirus_A	-0.518182
Clostridium_amygdalinum	Quail_picornavirus_QPV1HUN2010	0.604533
Clostridium_amygdalinum	Chicken_picornavirus_4	-0.620567
Clostridium_amygdalinum	Cryptosporidium_parvum_virus_1	-0.583241
Clostridium_amygdalinum	Tremovirus_A	0.580512
Clostridium_amygdalinum	Benes_partiti-like_virus	-0.582277
Clostridium_amygdalinum	Picobirnavirus_GIPBVturkeyUSAMN-12011	-0.602537
Clostridium_amygdalinum	Eimeria_brunetti_RNA_virus_1	0.804165
Clostridium_amygdalinum	Microviridae_phi-CA82	-0.562496
Clostridium_amygdalinum	Microviridae_sp.	-0.692111
Clostridium_amygdalinum	Chicken_picornavirus_UCC13	-0.643159
Clostridium_amygdalinum	Chicken_microvirus_mg7_10	-0.527679
Clostridium_amygdalinum	Phacovirus_CABPhV	-0.517324
Clostridium_amygdalinum	Equine_infectious_anemia_virus	0.590922
Clostridium_amygdalinum	Chicken_proventricular_necrosis_virus	-0.597988
Clostridium_amygdalinum	Human_gut_gokushovirus	-0.520988
Bacteroides_ovatus	Coprobacter_fastidiosus	0.619549
Bacteroides_ovatus	Anaerotruncus_colihominis	0.512782
Bacteroides_ovatus	Bacteroides_vulgatus	0.662212
Bacteroides_ovatus	Clostridium_saccharogumia	-0.640602
Bacteroides_ovatus	Aestuariispira_insulae	0.7063
Bacteroides_ovatus	Holdemania_filiformis	-0.652632
Bacteroides_ovatus	Anaeroplasma_abactoclasticum	0.767306
Bacteroides_ovatus	Christensenella_minuta	-0.598721
Bacteroides_ovatus	Butyricimonas_faecihominis	0.643238
Bacteroides_ovatus	Gordonibacter_pamelaeae	-0.566146
Bacteroides_ovatus	Avisivirus_Pf-CHK1AsV	0.604441
Bacteroides_ovatus	Duck-dominant_coronavirus	-0.53394
Bacteroides_ovatus	Avian_carcinoma_virus	0.522488
Coprobacter_fastidiosus	Bilophila_wadsworthia	0.637834
Coprobacter_fastidiosus	Bacteroides_vulgatus	0.542368
Coprobacter_fastidiosus	Alistipes_indistinctus	0.644603
Coprobacter_fastidiosus	Holdemania_filiformis	-0.697744
Coprobacter_fastidiosus	Anaeroplasma_abactoclasticum	0.611864
Coprobacter_fastidiosus	Butyricimonas_faecihominis	0.547068
Coprobacter_fastidiosus	Alistipes_onderdonkii	0.678064
Coprobacter_fastidiosus	Phacovirus_DMPhV	-0.568198
Coprococcus_comes	Anaerotruncus_colihominis	-0.596992
Coprococcus_comes	Bacteroides_vulgatus	-0.67604
Coprococcus_comes	Clostridium_saccharogumia	0.571429
Coprococcus_comes	Aestuariispira_insulae	-0.731526
Coprococcus_comes	Holdemania_filiformis	0.535338
Coprococcus_comes	Hydrogenoanaerobacterium_saccharovorans	-0.51824
Coprococcus_comes	Christensenella_minuta	0.562618
Coprococcus_comes	Gordonibacter_urolithinfaciens	0.636932
Coprococcus_comes	Bacteroides_plebeius	0.500718
Coprococcus_comes	Avian_nephritis_virus	-0.521805
Coprococcus_comes	Chicken_astrovirus	-0.709289
Coprococcus_comes	Avastrovirus_2	-0.500752
Coprococcus_comes	Astrovirus_HK-2014	-0.574436
Coprococcus_comes	Lysoka_partiti-like_virus	0.627174
Coprococcus_comes	Avian_astrovirus	-0.549699
Coprococcus_comes	UR2_sarcoma_virus	-0.539477
Coprococcus_comes	Picobirnavirus_GIPBVturkeyUSAMN-12011	0.602537
Coprococcus_comes	Avian_orthoreovirus	-0.524907
Anaerotruncus_colihominis	Bacteroides_vulgatus	0.656066
Anaerotruncus_colihominis	Clostridium_methylpentosum	0.574436
Anaerotruncus_colihominis	Aestuariispira_insulae	0.752021
Anaerotruncus_colihominis	Acetanaerobacterium_elongatum	0.626551
Anaerotruncus_colihominis	Anaeroplasma_abactoclasticum	0.59891
Anaerotruncus_colihominis	Gordonibacter_pamelaeae	-0.521189
Anaerotruncus_colihominis	Clostridium_propionicum	0.534636
Anaerotruncus_colihominis	RD114_retrovirus	-0.567873
Anaerotruncus_colihominis	Orivirus_A	-0.578724
Anaerotruncus_colihominis	Feline_endogenous_virus	-0.567873
Anaerotruncus_colihominis	Lysoka_partiti-like_virus	-0.615099
Anaerotruncus_colihominis	Avibirnavirus_gumboroense	-0.519368
Anaerotruncus_colihominis	Baboon_endogenous_virus	-0.567873
Anaerotruncus_colihominis	Mason-Pfizer_monkey_virus	-0.574326
Anaerotruncus_colihominis	Kirsten_murine_sarcoma_virus	-0.56142
Bifidobacterium_saeculare	Desulfovibrio_simplex	0.724491
Bifidobacterium_saeculare	Bacteroides_eggerthii	0.79294
Bifidobacterium_saeculare	Akkermansia_muciniphila	0.730857
Bifidobacterium_saeculare	Lactobacillus_equi	0.853936
Bifidobacterium_saeculare	Lactobacillus_ingluviei	0.921027
Bifidobacterium_saeculare	Eubacterium_callanderi	0.567213
Bifidobacterium_saeculare	Lactobacillus_saerimneri	0.578461
Bifidobacterium_saeculare	Faecalitalea_cylindroides	0.736616
Bifidobacterium_saeculare	Bacteroides_plebeius	0.676971
Bifidobacterium_saeculare	Avian_coronavirus	0.608099
Bifidobacterium_saeculare	Sicinivirus_A	-0.589559
Bifidobacterium_saeculare	Chicken_picornavirus_1	-0.568238
Bifidobacterium_saeculare	Megrivirus_C	0.609356
Bifidobacterium_saeculare	Sicinivirus_10	-0.55332
Bifidobacterium_saeculare	Avian_nephritis_virus	-0.735095
Bifidobacterium_saeculare	Chicken_picornavirus_5	0.730932
Bifidobacterium_saeculare	Chicken_astrovirus	-0.701987
Bifidobacterium_saeculare	Avastrovirus_2	-0.689673
Bifidobacterium_saeculare	Chicken_proventriculitis_virus	0.836
Bifidobacterium_saeculare	Beihai_tombus-like_virus_15	-0.525776
Bifidobacterium_saeculare	Astrovirus_HK-2014	-0.594194
Bifidobacterium_saeculare	Melegrivirus_A	0.659429
Bifidobacterium_saeculare	Porcine_picobirnavirus	0.543758
Bifidobacterium_saeculare	Avian_nephritis_virus_3	-0.630403
Bifidobacterium_saeculare	Chicken_picornavirus_4	0.643257
Bifidobacterium_saeculare	Benes_partiti-like_virus	0.577566
Bifidobacterium_saeculare	Picobirnavirus_GIPBVturkeyUSAMN-12011	0.746857
Bifidobacterium_saeculare	Microviridae_phi-CA82	0.584097
Bifidobacterium_saeculare	Chicken_picornavirus_UCC13	0.838024
Bifidobacterium_saeculare	Chicken_proventricular_necrosis_virus	0.775702
Bifidobacterium_saeculare	Human_gut_gokushovirus	0.53734
Lactobacillus_salivarius	Clostridium_polysaccharolyticum	0.557895
Lactobacillus_salivarius	Bacteroides_vulgatus	-0.50703
Lactobacillus_salivarius	Butyricimonas_paravirosa	-0.543914
Lactobacillus_salivarius	Parabacteroides_phage_YZ-2015a	-0.593686
Lactobacillus_salivarius	Circoviridae_sp.	-0.500011
Lactobacillus_salivarius	Oengusvirus_oengus	-0.556353
Lactobacillus_salivarius	Prokaryotic_dsDNA_virus_sp.	-0.520988
Enterococcus_cecorum	Hydrogenoanaerobacterium_saccharovorans	-0.659142
Enterococcus_cecorum	Gordonibacter_urolithinfaciens	0.651366
Enterococcus_cecorum	Clostridium_propionicum	-0.512773
Enterococcus_cecorum	Chicken_picornavirus_UCCPhV	-0.512223
Enterococcus_cecorum	Sicinivirus_10	-0.564834
Enterococcus_cecorum	Avian_nephritis_virus	-0.558857
Enterococcus_cecorum	Chicken_proventriculitis_virus	0.562888
Enterococcus_cecorum	Phacovirus_VGPhV	-0.576909
Enterococcus_cecorum	Astrovirus_HK-2014	-0.627304
Enterococcus_cecorum	Aveparvovirus_galliform1	-0.737746
Enterococcus_cecorum	Quail_picornavirus_QPV1HUN2010	-0.514159
Enterococcus_cecorum	Avian_nephritis_virus_3	-0.570785
Enterococcus_cecorum	Emesvirus_zinderi	-0.507835
Enterococcus_cecorum	Sapelovirus_B	-0.571234
Enterococcus_cecorum	Tremovirus_A	-0.699878
Enterococcus_cecorum	Eimeria_brunetti_RNA_virus_1	-0.644539
Enterococcus_cecorum	Equine_infectious_anemia_virus	-0.618823
Bilophila_wadsworthia	Clostridium_polysaccharolyticum	-0.505453
Bilophila_wadsworthia	Bacteroides_vulgatus	0.514137
Bilophila_wadsworthia	Alistipes_indistinctus	0.50602
Bilophila_wadsworthia	Holdemania_filiformis	-0.606995
Bilophila_wadsworthia	Butyricimonas_paravirosa	0.679754
Bilophila_wadsworthia	Murine_picobirnavirus_3	0.518297
Bilophila_wadsworthia	Oengusvirus_oengus	0.59044
Bilophila_wadsworthia	Equine_infectious_anemia_virus	-0.564454
Bilophila_wadsworthia	Streptococcus_phage_phiSC070807	0.518297
Bacteroides_clarus	Desulfovibrio_simplex	0.507521
Bacteroides_clarus	Alistipes_indistinctus	0.568412
Bacteroides_clarus	Blautia_schinkii	-0.513844
Bacteroides_clarus	Bacteroides_eggerthii	0.522342
Bacteroides_clarus	Lactobacillus_ingluviei	0.55758
Bacteroides_clarus	Lactobacillus_saerimneri	0.524421
Bacteroides_clarus	Chicken_proventriculitis_virus	0.545473
Bacteroides_clarus	Rabbit_picobirnavirus_7	-0.573511
Bacteroides_clarus	Chicken_proventricular_necrosis_virus	0.510421
Clostridium_polysaccharolyticum	Bacteroides_vulgatus	-0.52854
Clostridium_polysaccharolyticum	Clostridium_saccharogumia	0.64812
Clostridium_polysaccharolyticum	Holdemania_filiformis	0.645113
Clostridium_polysaccharolyticum	Lactobacillus_aviarius	0.55623
Clostridium_polysaccharolyticum	Butyricimonas_paravirosa	-0.77094
Clostridium_polysaccharolyticum	Christensenella_minuta	0.551335
Clostridium_polysaccharolyticum	Alistipes_onderdonkii	-0.59914
Clostridium_polysaccharolyticum	Gallivirus_A	-0.514286
Clostridium_polysaccharolyticum	Sicinivirus_UCC1	-0.545865
Clostridium_polysaccharolyticum	Picobirnavirus_wolfPRT1892015	-0.520988
Clostridium_polysaccharolyticum	Marmot_picobirnavirus	-0.510807
Clostridium_polysaccharolyticum	Chicken_stool-associated_circular_virus	-0.520988
Clostridium_polysaccharolyticum	Circular_ssDNA_virus_sp.	-0.518102
Clostridium_polysaccharolyticum	Aveparvovirus_galliform1	0.746804
Clostridium_polysaccharolyticum	Pythium_polare_bunya-like_RNA_virus_1	-0.520988
Clostridium_polysaccharolyticum	Chimpanzee_faeces_associated_circular_DNA_virus_1	-0.518102
Clostridium_polysaccharolyticum	Camula_virus	-0.520988
Clostridium_polysaccharolyticum	Macaque_picobirnavirus_28	-0.518102
Clostridium_polysaccharolyticum	Macaque_picobirnavirus_2	-0.518102
Clostridium_polysaccharolyticum	Avastrovirus_1	-0.803691
Clostridium_polysaccharolyticum	Rodent_stool-associated_circular_genome_virus	-0.520988
Clostridium_polysaccharolyticum	Circoviridae_sp.	-0.644283
Clostridium_polysaccharolyticum	Cressdnaviricota_sp.	-0.518102
Clostridium_polysaccharolyticum	Orthopicobirnavirus_hominis	-0.512812
Clostridium_polysaccharolyticum	Caudoviricetes_sp.	-0.520217
Clostridium_polysaccharolyticum	Pink-eared_duck_picobirnavirus	-0.518102
Clostridium_polysaccharolyticum	Chicken_associated_smacovirus	-0.520988
Clostridium_polysaccharolyticum	Riboviria_sp.	-0.575704
Clostridium_polysaccharolyticum	Eimeria_brunetti_RNA_virus_1	0.602521
Clostridium_polysaccharolyticum	Chicken_virus_mg4_657	-0.518102
Clostridium_polysaccharolyticum	Kumba_picobirna-like_virus	-0.520988
Clostridium_polysaccharolyticum	Macaque_picobirnavirus_12	-0.518102
Clostridium_polysaccharolyticum	Tasmanian_devil-associated_picobirnavirus_1	-0.520988
Clostridium_polysaccharolyticum	Human_smacovirus_1	-0.520988
Clostridium_polysaccharolyticum	Chicken_virus_mg8_273	-0.520988
Clostridium_polysaccharolyticum	Lysoka_picobirna-like_virus	-0.518102
Clostridium_polysaccharolyticum	Kristianstad_virus	-0.518102
Clostridium_polysaccharolyticum	Microtus_picobirnavirus_V-111USA2008	-0.518102
Clostridium_polysaccharolyticum	Mischke_partiti-like_virus	-0.518102
Clostridium_polysaccharolyticum	Podoviridae_sp._ctcf755	-0.518182
Clostridium_polysaccharolyticum	Picobirnavirus_dogKNA2015	-0.520988
Clostridium_polysaccharolyticum	Macaque_picobirnavirus_1	-0.512812
Clostridium_polysaccharolyticum	Wuhan_pillworm_virus_4	-0.518102
Clostridium_polysaccharolyticum	Chicken_stool_associated_circular_virus_1	-0.520988
Desulfovibrio_simplex	Clostridium_saccharogumia	0.510275
Desulfovibrio_simplex	Bacteroides_eggerthii	0.661635
Desulfovibrio_simplex	Lactobacillus_equi	0.731094
Desulfovibrio_simplex	Lactobacillus_ingluviei	0.796106
Desulfovibrio_simplex	Eubacterium_callanderi	0.585586
Desulfovibrio_simplex	Lactobacillus_saerimneri	0.609675
Desulfovibrio_simplex	Faecalitalea_cylindroides	0.566632
Desulfovibrio_simplex	Bacteroides_plebeius	0.672544
Desulfovibrio_simplex	Avian_coronavirus	0.574471
Desulfovibrio_simplex	Dickeya_phage_phiDP23.1	-0.59587
Desulfovibrio_simplex	Sicinivirus_A	-0.530028
Desulfovibrio_simplex	Phacovirus_Pf-CHK1PhV	-0.511921
Desulfovibrio_simplex	Chicken_picornavirus_1	-0.518505
Desulfovibrio_simplex	Megrivirus_C	0.657508
Desulfovibrio_simplex	Sicinivirus_10	-0.544649
Desulfovibrio_simplex	Avian_nephritis_virus	-0.52509
Desulfovibrio_simplex	Chicken_picornavirus_5	0.784162
Desulfovibrio_simplex	Chicken_picobirnavirus	0.685353
Desulfovibrio_simplex	Chicken_proventriculitis_virus	0.712314
Desulfovibrio_simplex	Marmot_picobirnavirus	0.53498
Desulfovibrio_simplex	Phacovirus_TRPhV	-0.545047
Desulfovibrio_simplex	Melegrivirus_A	0.682888
Desulfovibrio_simplex	Chicken_picornavirus_4	0.735533
Desulfovibrio_simplex	Picornavirus_chickenCHK175USA2010	0.59295
Desulfovibrio_simplex	Benes_partiti-like_virus	0.629648
Desulfovibrio_simplex	Picobirnavirus_GIPBVturkeyUSAMN-12011	0.602727
Desulfovibrio_simplex	Microviridae_phi-CA82	0.556856
Desulfovibrio_simplex	Chicken_picornavirus_UCC13	0.738158
Desulfovibrio_simplex	Chicken_microvirus_mg7_10	0.501893
Desulfovibrio_simplex	Phacovirus_CABPhV	0.645153
Desulfovibrio_simplex	Picornavirus_chickenCHK148USA2010	0.585166
Desulfovibrio_simplex	Chicken_proventricular_necrosis_virus	0.689889
Desulfovibrio_simplex	Human_gut_gokushovirus	0.503936
Odoribacter_laneus	Bacteroides_vulgatus	0.533848
Odoribacter_laneus	Clostridium_saccharogumia	-0.541839
Odoribacter_laneus	Bacteroides_coprocola	0.607988
Odoribacter_laneus	Elusimicrobium_minutum	0.607988
Odoribacter_laneus	Qubevirus_faecium	0.617326
Odoribacter_laneus	Wenzhou_tombus-like_virus_2	0.607988
Odoribacter_laneus	Enterogokushovirus_EC6098	0.638132
Bacteroides_vulgatus	Clostridium_saccharogumia	-0.706769
Bacteroides_vulgatus	Aestuariispira_insulae	0.847302
Bacteroides_vulgatus	Holdemania_filiformis	-0.606899
Bacteroides_vulgatus	Anaeroplasma_abactoclasticum	0.538749
Bacteroides_vulgatus	Butyricimonas_virosa	0.519584
Bacteroides_vulgatus	Christensenella_minuta	-0.624035
Bacteroides_vulgatus	Butyricimonas_faecihominis	0.502582
Bacteroides_vulgatus	Avastrovirus_2	0.531613
Clostridium_methylpentosum	Acetanaerobacterium_elongatum	0.905604
Clostridium_methylpentosum	Phacovirus_sp.	0.538346
Clostridium_methylpentosum	Turkey_picobirnavirus	-0.515821
Clostridium_methylpentosum	Microviridae_sp.	-0.629049
Blautia_hydrogenotrophica	Clostridium_saccharogumia	0.697744
Blautia_hydrogenotrophica	Holdemania_filiformis	0.675188
Blautia_hydrogenotrophica	Lactobacillus_ingluviei	0.513845
Blautia_hydrogenotrophica	Eubacterium_callanderi	0.543196
Blautia_hydrogenotrophica	Avian_coronavirus	0.565414
Blautia_hydrogenotrophica	Avastrovirus_2	-0.509774
Blautia_hydrogenotrophica	Avian_nephritis_virus_3	-0.5034
Clostridium_colinum	Faecalitalea_cylindroides	0.614407
Clostridium_colinum	Avastrovirus_1	-0.559896
Clostridium_colinum	Avian_orthoreovirus	-0.539421
Clostridium_colinum	Streptococcus_phage_phiJH1301-2	0.517324
Alistipes_indistinctus	Hydrogenoanaerobacterium_saccharovorans	-0.677953
Alistipes_indistinctus	Butyricimonas_paravirosa	0.558313
Alistipes_indistinctus	Alistipes_onderdonkii	0.760668
Alistipes_indistinctus	Phacovirus_sp.	-0.616021
Alistipes_indistinctus	Phacovirus_Pf-CHK1PhV	-0.572396
Alistipes_indistinctus	Megrivirus_C	0.570931
Alistipes_indistinctus	Chicken_picornavirus_5	0.586026
Alistipes_indistinctus	Chicken_proventriculitis_virus	0.522086
Alistipes_indistinctus	Marmot_picobirnavirus	0.588279
Alistipes_indistinctus	Phacovirus_DMPhV	-0.518392
Alistipes_indistinctus	Caudoviricetes_sp.	0.609553
Alistipes_indistinctus	Benes_partiti-like_virus	0.626624
Alistipes_indistinctus	Picobirnavirus_GIPBVturkeyUSAMN-12011	0.595345
Alistipes_indistinctus	Eimeria_brunetti_RNA_virus_1	-0.683918
Alistipes_indistinctus	Microviridae_sp.	0.517307
Alistipes_indistinctus	Rabbit_picobirnavirus_5	0.518594
Alistipes_indistinctus	Fox_fecal_picobirnavirus	0.50138
Alistipes_indistinctus	Podoviridae_sp._ctcf755	0.525795
Alistipes_indistinctus	Chicken_proventricular_necrosis_virus	0.545493
Clostridium_saccharogumia	Aestuariispira_insulae	-0.630625
Clostridium_saccharogumia	Holdemania_filiformis	0.759398
Clostridium_saccharogumia	Anaeroplasma_abactoclasticum	-0.50976
Clostridium_saccharogumia	Butyricimonas_paravirosa	-0.690535
Clostridium_saccharogumia	Christensenella_minuta	0.609252
Clostridium_saccharogumia	Eubacterium_callanderi	0.607392
Clostridium_saccharogumia	Avian_nephritis_virus	-0.613534
Clostridium_saccharogumia	Chicken_astrovirus	-0.643099
Clostridium_saccharogumia	Avastrovirus_1	-0.710993
Clostridium_saccharogumia	Circoviridae_sp.	-0.509892
Clostridium_saccharogumia	Riboviria_sp.	-0.539421
Blautia_schinkii	Rotavirus_D	-0.50469
Blautia_schinkii	Sapelovirus_B	0.558252
Blautia_schinkii	Avibirnavirus_gumboroense	-0.50216
Blautia_schinkii	Tremovirus_A	0.515421
Blautia_schinkii	Microviridae_phi-CA82	-0.541727
Blautia_schinkii	Chaphamaparvovirus_galliform2	0.537961
Blautia_schinkii	Equine_infectious_anemia_virus	0.571373
Blautia_schinkii	Enterogokushovirus_EC6098	-0.510585
Aestuariispira_insulae	Holdemania_filiformis	-0.539185
Aestuariispira_insulae	Anaeroplasma_abactoclasticum	0.568791
Aestuariispira_insulae	Christensenella_minuta	-0.692372
Aestuariispira_insulae	Gordonibacter_urolithinfaciens	-0.507438
Aestuariispira_insulae	Chicken_astrovirus	0.529925
Aestuariispira_insulae	Lysoka_partiti-like_virus	-0.561005
Aestuariispira_insulae	Picobirnavirus_GIPBVturkeyUSAMN-12011	-0.542297
Holdemania_filiformis	Anaeroplasma_abactoclasticum	-0.500616
Holdemania_filiformis	Butyricimonas_paravirosa	-0.638508
Holdemania_filiformis	Christensenella_minuta	0.559609
Holdemania_filiformis	Alistipes_onderdonkii	-0.513428
Holdemania_filiformis	Avastrovirus_1	-0.670206
Holdemania_filiformis	Avian_carcinoma_virus	-0.570867
Lactobacillus_aviarius	Enterorhabdus_caecimuris	-0.638497
Lactobacillus_aviarius	Bacteroides_plebeius	0.556028
Lactobacillus_aviarius	Qubevirus_faecium	-0.614585
Lactobacillus_aviarius	Sicinivirus_UCC1	-0.524532
Lactobacillus_aviarius	RD114_retrovirus	-0.534934
Lactobacillus_aviarius	Beihai_tombus-like_virus_15	-0.540432
Lactobacillus_aviarius	Calicivirus_chickenV0021Bayern2004	-0.563636
Lactobacillus_aviarius	Feline_endogenous_virus	-0.534934
Lactobacillus_aviarius	Rotavirus_G	-0.595105
Lactobacillus_aviarius	Orthoavulavirus_javaense	-0.560617
Lactobacillus_aviarius	Campylobacter_phage_DA10	0.582707
Lactobacillus_aviarius	Baboon_endogenous_virus	-0.534934
Lactobacillus_aviarius	Rabbit_picobirnavirus_7	-0.507853
Lactobacillus_aviarius	Mason-Pfizer_monkey_virus	-0.534934
Lactobacillus_aviarius	Drosophila_A_virus	-0.626681
Acetanaerobacterium_elongatum	Avisivirus_B	-0.514829
Hydrogenoanaerobacterium_saccharovorans	Butyricimonas_paravirosa	-0.508633
Hydrogenoanaerobacterium_saccharovorans	Lachnospira_multipara	0.511571
Hydrogenoanaerobacterium_saccharovorans	Enterorhabdus_caecimuris	-0.604822
Hydrogenoanaerobacterium_saccharovorans	Megrivirus_C	-0.53781
Hydrogenoanaerobacterium_saccharovorans	Astrovirus_HK-2014	0.509966
Hydrogenoanaerobacterium_saccharovorans	Marmot_picobirnavirus	-0.542542
Hydrogenoanaerobacterium_saccharovorans	Aveparvovirus_galliform1	0.646059
Hydrogenoanaerobacterium_saccharovorans	Caudoviricetes_sp.	-0.523808
Hydrogenoanaerobacterium_saccharovorans	Picobirnavirus_GIPBVturkeyUSAMN-12011	-0.512813
Hydrogenoanaerobacterium_saccharovorans	Eimeria_brunetti_RNA_virus_1	0.716065
Hydrogenoanaerobacterium_saccharovorans	Drosophila_A_virus	-0.595808
Butyricimonas_paravirosa	Alistipes_onderdonkii	0.548962
Butyricimonas_paravirosa	Eubacterium_callanderi	-0.517723
Butyricimonas_paravirosa	Phacovirus_sp.	-0.613283
Butyricimonas_paravirosa	Phacovirus_Pf-CHK1PhV	-0.502924
Butyricimonas_paravirosa	Picobirnavirus_wolfPRT1892015	0.517464
Butyricimonas_paravirosa	Marmot_picobirnavirus	0.509091
Butyricimonas_paravirosa	Chicken_stool-associated_circular_virus	0.517464
Butyricimonas_paravirosa	Circular_ssDNA_virus_sp.	0.511411
Butyricimonas_paravirosa	Aveparvovirus_galliform1	-0.623699
Butyricimonas_paravirosa	Pythium_polare_bunya-like_RNA_virus_1	0.517464
Butyricimonas_paravirosa	Chimpanzee_faeces_associated_circular_DNA_virus_1	0.511411
Butyricimonas_paravirosa	Camula_virus	0.517464
Butyricimonas_paravirosa	Macaque_picobirnavirus_28	0.511411
Butyricimonas_paravirosa	Macaque_picobirnavirus_2	0.511411
Butyricimonas_paravirosa	Avastrovirus_1	0.783318
Butyricimonas_paravirosa	Rodent_stool-associated_circular_genome_virus	0.517464
Butyricimonas_paravirosa	Circoviridae_sp.	0.652683
Butyricimonas_paravirosa	Otarine_picobirnavirus	0.530032
Butyricimonas_paravirosa	Cressdnaviricota_sp.	0.511411
Butyricimonas_paravirosa	Pink-eared_duck_picobirnavirus	0.511411
Butyricimonas_paravirosa	Bovine_picobirnavirus	0.507208
Butyricimonas_paravirosa	Chicken_associated_smacovirus	0.517464
Butyricimonas_paravirosa	Riboviria_sp.	0.598505
Butyricimonas_paravirosa	Eimeria_brunetti_RNA_virus_1	-0.67549
Butyricimonas_paravirosa	Chicken_virus_mg4_657	0.511411
Butyricimonas_paravirosa	Mongoose_picobirnavirus	0.507208
Butyricimonas_paravirosa	Kumba_picobirna-like_virus	0.517464
Butyricimonas_paravirosa	Rat_picobirnavirus	0.535104
Butyricimonas_paravirosa	Macaque_picobirnavirus_12	0.511411
Butyricimonas_paravirosa	Tasmanian_devil-associated_picobirnavirus_1	0.517464
Butyricimonas_paravirosa	Gokushovirus_WZ-2015a	0.514816
Butyricimonas_paravirosa	Human_smacovirus_1	0.517464
Butyricimonas_paravirosa	Chicken_virus_mg8_273	0.517464
Butyricimonas_paravirosa	Lysoka_picobirna-like_virus	0.511411
Butyricimonas_paravirosa	Kristianstad_virus	0.511411
Butyricimonas_paravirosa	Microtus_picobirnavirus_V-111USA2008	0.511411
Butyricimonas_paravirosa	Mischke_partiti-like_virus	0.511411
Butyricimonas_paravirosa	Shelduck_picobirnavirus_II	0.530032
Butyricimonas_paravirosa	Picobirnavirus_dogKNA2015	0.517464
Butyricimonas_paravirosa	Wuhan_pillworm_virus_4	0.511411
Butyricimonas_paravirosa	Chicken_stool_associated_circular_virus_1	0.517464
Olsenella_uli	Bacteroides_eggerthii	0.576711
Olsenella_uli	Akkermansia_muciniphila	0.670059
Olsenella_uli	Enterorhabdus_caecimuris	-0.575499
Olsenella_uli	Lactobacillus_equi	0.528652
Olsenella_uli	Faecalitalea_cylindroides	0.718475
Olsenella_uli	Chicken_picornavirus_UCC13	0.545614
Olsenella_uli	Human_gut_gokushovirus	0.532976
Bacteroides_eggerthii	Akkermansia_muciniphila	0.82609
Bacteroides_eggerthii	Lactobacillus_equi	0.642308
Bacteroides_eggerthii	Lactobacillus_ingluviei	0.845277
Bacteroides_eggerthii	Faecalitalea_cylindroides	0.83735
Bacteroides_eggerthii	Gallibacterium_anatis	0.697761
Bacteroides_eggerthii	Avian_coronavirus	0.537759
Bacteroides_eggerthii	Phacovirus_Pf-CHK1PhV	-0.506569
Bacteroides_eggerthii	Chicken_picornavirus_1	-0.504418
Bacteroides_eggerthii	Megrivirus_C	0.585218
Bacteroides_eggerthii	Avian_nephritis_virus	-0.597988
Bacteroides_eggerthii	Chicken_picornavirus_5	0.673901
Bacteroides_eggerthii	Chicken_astrovirus	-0.614889
Bacteroides_eggerthii	Avastrovirus_2	-0.618423
Bacteroides_eggerthii	Chicken_proventriculitis_virus	0.78631
Bacteroides_eggerthii	Astrovirus_HK-2014	-0.614121
Bacteroides_eggerthii	Melegrivirus_A	0.54697
Bacteroides_eggerthii	Avian_nephritis_virus_3	-0.504166
Bacteroides_eggerthii	Chicken_picornavirus_4	0.534306
Bacteroides_eggerthii	Benes_partiti-like_virus	0.536344
Bacteroides_eggerthii	Picobirnavirus_GIPBVturkeyUSAMN-12011	0.676253
Bacteroides_eggerthii	Microviridae_phi-CA82	0.668462
Bacteroides_eggerthii	Chicken_picornavirus_UCC13	0.69
Bacteroides_eggerthii	Chicken_proventricular_necrosis_virus	0.768462
Bacteroides_eggerthii	Human_gut_gokushovirus	0.654409
Lachnospira_multipara	Gordonibacter_urolithinfaciens	-0.57029
Lachnospira_multipara	Gallivirus_Pf-CHK1GV	-0.722748
Lachnospira_multipara	Qubevirus_faecium	-0.554813
Lachnospira_multipara	Chicken_picornavirus_HK-2014	0.581835
Lachnospira_multipara	Sicinivirus_UCC1	-0.765173
Lachnospira_multipara	RD114_retrovirus	-0.526677
Lachnospira_multipara	Orivirus_A	-0.723231
Lachnospira_multipara	Beihai_tombus-like_virus_15	-0.578233
Lachnospira_multipara	Phacovirus_VGPhV	0.560622
Lachnospira_multipara	Feline_endogenous_virus	-0.526677
Lachnospira_multipara	Aveparvovirus_galliform1	0.561797
Lachnospira_multipara	Chicken_gallivirus_1	-0.65641
Lachnospira_multipara	Orthoavulavirus_javaense	-0.615525
Lachnospira_multipara	Avian_astrovirus	0.614591
Lachnospira_multipara	Campylobacter_phage_DA10	0.529812
Lachnospira_multipara	Baboon_endogenous_virus	-0.526677
Lachnospira_multipara	Rabbit_picobirnavirus_7	-0.521735
Lachnospira_multipara	Mason-Pfizer_monkey_virus	-0.526677
Lachnospira_multipara	Kirsten_murine_sarcoma_virus	-0.539681
Lachnospira_multipara	Eimeria_tenella_RNA_virus_1	-0.548397
Butyricimonas_virosa	Butyricimonas_faecihominis	0.783299
Butyricimonas_virosa	Gordonibacter_pamelaeae	-0.735988
Christensenella_minuta	Avian_nephritis_virus	-0.50771
Christensenella_minuta	Chicken_astrovirus	-0.668172
Christensenella_minuta	Avastrovirus_2	-0.542309
Christensenella_minuta	Avian_nephritis_virus_3	-0.530769
Christensenella_minuta	Avastrovirus_1	-0.622237
Christensenella_minuta	Chicken_proventricular_necrosis_virus	0.520746
Butyricimonas_faecihominis	Gordonibacter_pamelaeae	-0.645481
Butyricimonas_faecihominis	Picornavirus_chickenCHK1USA2010	-0.584905
Butyricimonas_faecihominis	Bavaria_virus	0.551797
Butyricimonas_faecihominis	Turkey_picornavirus	-0.562833
Butyricimonas_faecihominis	Chicken_calicivirus_UCC1	0.671331
Butyricimonas_faecihominis	Riboviria_sp.	0.588361
Butyricimonas_faecihominis	Avisivirus_Pf-CHK1AsV	0.553646
Butyricimonas_faecihominis	Pigeon-dominant_Coronavirus	-0.526351
Akkermansia_muciniphila	Enterorhabdus_caecimuris	-0.520923
Akkermansia_muciniphila	Lactobacillus_ingluviei	0.665186
Akkermansia_muciniphila	Faecalitalea_cylindroides	0.665042
Akkermansia_muciniphila	Gallibacterium_anatis	0.638759
Akkermansia_muciniphila	Sicinivirus_A	-0.547845
Akkermansia_muciniphila	Avian_nephritis_virus	-0.586778
Akkermansia_muciniphila	Chicken_astrovirus	-0.538314
Akkermansia_muciniphila	Avastrovirus_2	-0.583997
Akkermansia_muciniphila	Chicken_proventriculitis_virus	0.594286
Akkermansia_muciniphila	Avian_nephritis_virus_3	-0.59551
Akkermansia_muciniphila	Picobirnavirus_GIPBVturkeyUSAMN-12011	0.506286
Akkermansia_muciniphila	Microviridae_phi-CA82	0.536362
Akkermansia_muciniphila	Chicken_picornavirus_UCC13	0.51382
Akkermansia_muciniphila	Chicken_proventricular_necrosis_virus	0.576141
Akkermansia_muciniphila	Human_gut_gokushovirus	0.601394
Gordonibacter_pamelaeae	Astrovirus_HK-2014	-0.533381
Anaerofustis_stercorihominis	Enterococcus_faecalis	-0.526606
Anaerofustis_stercorihominis	Clostridium_disporicum	0.573999
Anaerofustis_stercorihominis	Parabacteroides_phage_YZ-2015a	0.517026
Alistipes_onderdonkii	Phacovirus_sp.	-0.546525
Alistipes_onderdonkii	Chicken_calicivirus_UCC1	0.590011
Alistipes_onderdonkii	Sapelovirus_B	-0.502212
Alistipes_onderdonkii	Phacovirus_DMPhV	-0.641321
Alistipes_onderdonkii	Picobirnavirus_HK-2014	0.556966
Alistipes_onderdonkii	Orthopicobirnavirus_hominis	0.562426
Alistipes_onderdonkii	Bovine_picobirnavirus	0.543314
Alistipes_onderdonkii	Riboviria_sp.	0.666175
Alistipes_onderdonkii	Mongoose_picobirnavirus	0.543314
Alistipes_onderdonkii	Rabbit_picobirnavirus_5	0.622745
Alistipes_onderdonkii	Pigeon-dominant_Coronavirus	-0.52671
Alistipes_onderdonkii	Fox_fecal_picobirnavirus	0.61789
Alistipes_onderdonkii	Podoviridae_sp._ctcf755	0.620964
Alistipes_onderdonkii	Macaque_picobirnavirus_1	0.562426
Enterorhabdus_caecimuris	Catabacter_hongkongensis	0.527036
Enterorhabdus_caecimuris	RD114_retrovirus	0.653846
Enterorhabdus_caecimuris	Calicivirus_chickenV0021Bayern2004	0.536707
Enterorhabdus_caecimuris	Feline_endogenous_virus	0.653846
Enterorhabdus_caecimuris	Rotavirus_G	0.517415
Enterorhabdus_caecimuris	Orthoavulavirus_javaense	0.531342
Enterorhabdus_caecimuris	Baboon_endogenous_virus	0.653846
Enterorhabdus_caecimuris	Mason-Pfizer_monkey_virus	0.656044
Enterorhabdus_caecimuris	Kirsten_murine_sarcoma_virus	0.638462
Enterorhabdus_caecimuris	Drosophila_A_virus	0.662994
Enterorhabdus_caecimuris	Reticuloendotheliosis_virus	0.511604
Lactobacillus_equi	Lactobacillus_ingluviei	0.832556
Lactobacillus_equi	Lactobacillus_saerimneri	0.578925
Lactobacillus_equi	Faecalitalea_cylindroides	0.781988
Lactobacillus_equi	Bacteroides_plebeius	0.816589
Lactobacillus_equi	Avian_coronavirus	0.524853
Lactobacillus_equi	Megrivirus_C	0.676553
Lactobacillus_equi	Sicinivirus_10	-0.610375
Lactobacillus_equi	Avian_nephritis_virus	-0.637782
Lactobacillus_equi	Chicken_picornavirus_5	0.754668
Lactobacillus_equi	Chicken_picobirnavirus	0.523366
Lactobacillus_equi	Chicken_astrovirus	-0.623497
Lactobacillus_equi	Avastrovirus_2	-0.613045
Lactobacillus_equi	Chicken_proventriculitis_virus	0.843328
Lactobacillus_equi	Calicivirus_chickenV0021Bayern2004	-0.516581
Lactobacillus_equi	Astrovirus_HK-2014	-0.550665
Lactobacillus_equi	Marmot_picobirnavirus	0.524329
Lactobacillus_equi	Melegrivirus_A	0.820786
Lactobacillus_equi	Avian_nephritis_virus_3	-0.520359
Lactobacillus_equi	Turkey_picobirnavirus	0.521584
Lactobacillus_equi	Chicken_picornavirus_4	0.788737
Lactobacillus_equi	Picornavirus_chickenCHK175USA2010	0.588086
Lactobacillus_equi	Benes_partiti-like_virus	0.567894
Lactobacillus_equi	Picobirnavirus_GIPBVturkeyUSAMN-12011	0.722663
Lactobacillus_equi	Microviridae_sp.	0.544625
Lactobacillus_equi	Chicken_picornavirus_UCC13	0.981538
Lactobacillus_equi	Picornavirus_chickenCHK148USA2010	0.524209
Lactobacillus_equi	Chicken_proventricular_necrosis_virus	0.674615
Lactobacillus_equi	Human_gut_gokushovirus	0.580091
Lactobacillus_ingluviei	Eubacterium_callanderi	0.52569
Lactobacillus_ingluviei	Lactobacillus_saerimneri	0.57172
Lactobacillus_ingluviei	Faecalitalea_cylindroides	0.686684
Lactobacillus_ingluviei	Bacteroides_plebeius	0.623102
Lactobacillus_ingluviei	Gallibacterium_anatis	0.536769
Lactobacillus_ingluviei	Avian_coronavirus	0.667999
Lactobacillus_ingluviei	Sicinivirus_A	-0.559301
Lactobacillus_ingluviei	Phacovirus_sp.	-0.523727
Lactobacillus_ingluviei	Phacovirus_Pf-CHK1PhV	-0.634401
Lactobacillus_ingluviei	Chicken_picornavirus_1	-0.610685
Lactobacillus_ingluviei	Megrivirus_C	0.683763
Lactobacillus_ingluviei	Sicinivirus_10	-0.579827
Lactobacillus_ingluviei	Avian_nephritis_virus	-0.752981
Lactobacillus_ingluviei	Chicken_picornavirus_5	0.783814
Lactobacillus_ingluviei	Chicken_picobirnavirus	0.575804
Lactobacillus_ingluviei	Chicken_astrovirus	-0.752275
Lactobacillus_ingluviei	Avastrovirus_2	-0.754957
Lactobacillus_ingluviei	Chicken_proventriculitis_virus	0.879605
Lactobacillus_ingluviei	Astrovirus_HK-2014	-0.687762
Lactobacillus_ingluviei	Marmot_picobirnavirus	0.576019
Lactobacillus_ingluviei	Melegrivirus_A	0.651785
Lactobacillus_ingluviei	Avian_nephritis_virus_3	-0.622913
Lactobacillus_ingluviei	Chicken_picornavirus_4	0.631169
Lactobacillus_ingluviei	Benes_partiti-like_virus	0.65627
Lactobacillus_ingluviei	Picobirnavirus_GIPBVturkeyUSAMN-12011	0.799198
Lactobacillus_ingluviei	Eimeria_brunetti_RNA_virus_1	-0.527912
Lactobacillus_ingluviei	Microviridae_phi-CA82	0.658694
Lactobacillus_ingluviei	Microviridae_sp.	0.555299
Lactobacillus_ingluviei	Chicken_picornavirus_UCC13	0.812767
Lactobacillus_ingluviei	Chicken_microvirus_mg7_10	0.587013
Lactobacillus_ingluviei	Phacovirus_CABPhV	0.501795
Lactobacillus_ingluviei	Chicken_proventricular_necrosis_virus	0.889096
Eubacterium_callanderi	Enterococcus_faecalis	0.64703
Lactobacillus_saerimneri	Avian_coronavirus	0.637762
Lactobacillus_saerimneri	Sicinivirus_A	-0.695246
Lactobacillus_saerimneri	Sicinivirus_sp.	-0.570179
Lactobacillus_saerimneri	Chicken_picornavirus_1	-0.622225
Lactobacillus_saerimneri	Chicken_picornavirus_5	0.502232
Lactobacillus_saerimneri	RD114_retrovirus	-0.533366
Lactobacillus_saerimneri	Chicken_proventriculitis_virus	0.559306
Lactobacillus_saerimneri	Beihai_tombus-like_virus_15	-0.697143
Lactobacillus_saerimneri	Calicivirus_chickenV0021Bayern2004	-0.715028
Lactobacillus_saerimneri	Feline_endogenous_virus	-0.533366
Lactobacillus_saerimneri	Calicivirus_chickenV0027Bayern2004	-0.561146
Lactobacillus_saerimneri	Chicken_picornavirus_4	0.545176
Lactobacillus_saerimneri	Orthoavulavirus_javaense	-0.616291
Lactobacillus_saerimneri	Baboon_endogenous_virus	-0.533366
Lactobacillus_saerimneri	Mason-Pfizer_monkey_virus	-0.533366
Lactobacillus_saerimneri	Microviridae_phi-CA82	0.504476
Lactobacillus_saerimneri	Kirsten_murine_sarcoma_virus	-0.533366
Lactobacillus_saerimneri	Drosophila_A_virus	-0.538716
Lactobacillus_saerimneri	Chicken_picornavirus_UCC13	0.52781
Lactobacillus_saerimneri	Chicken_microvirus_mg7_10	0.594181
Gordonibacter_urolithinfaciens	Chicken_picornavirus_UCCPhV	-0.602247
Gordonibacter_urolithinfaciens	Chicken_picornavirus_HK-2014	-0.545491
Gordonibacter_urolithinfaciens	Avastrovirus_2	-0.624319
Gordonibacter_urolithinfaciens	Phacovirus_VGPhV	-0.526572
Gordonibacter_urolithinfaciens	Astrovirus_HK-2014	-0.652697
Gordonibacter_urolithinfaciens	Marmot_picobirnavirus	0.532231
Gordonibacter_urolithinfaciens	Avian_nephritis_virus_3	-0.613228
Gordonibacter_urolithinfaciens	Avian_astrovirus	-0.558819
Gordonibacter_urolithinfaciens	Picornavirus_chickenCHK175USA2010	0.512423
Gordonibacter_urolithinfaciens	Picobirnavirus_GIPBVturkeyUSAMN-12011	0.573397
Gordonibacter_urolithinfaciens	Eimeria_brunetti_RNA_virus_1	-0.507038
Gordonibacter_urolithinfaciens	Microviridae_sp.	0.517355
Cloacibacillus_porcorum	Picornavirus_chickenCHK165USA2010	0.539641
Faecalitalea_cylindroides	Bacteroides_plebeius	0.610895
Faecalitalea_cylindroides	Megrivirus_C	0.532568
Faecalitalea_cylindroides	Sicinivirus_10	-0.514793
Faecalitalea_cylindroides	Chicken_picornavirus_5	0.598883
Faecalitalea_cylindroides	Chicken_proventriculitis_virus	0.721705
Faecalitalea_cylindroides	Melegrivirus_A	0.659078
Faecalitalea_cylindroides	Chicken_picornavirus_4	0.642177
Faecalitalea_cylindroides	Picornavirus_chickenCHK175USA2010	0.573339
Faecalitalea_cylindroides	Picobirnavirus_GIPBVturkeyUSAMN-12011	0.623291
Faecalitalea_cylindroides	Microviridae_phi-CA82	0.55881
Faecalitalea_cylindroides	Chicken_picornavirus_UCC13	0.802749
Faecalitalea_cylindroides	Human_gut_gokushovirus	0.793946
Lactobacillus_coleohominis	Astrovirus_HK-2014	-0.508629
Corynebacterium_stationis	Avian_coronavirus	-0.749926
Corynebacterium_stationis	Sicinivirus_A	0.533013
Corynebacterium_stationis	Sicinivirus_UCC1	0.558969
Corynebacterium_stationis	Drosophila_A_virus	0.529143
Corynebacterium_stationis	Pigeon-dominant_Coronavirus	-0.547934
Corynebacterium_stationis	Bloomfield_virus	0.638759
Catabacter_hongkongensis	Picobirnavirus_wolfPRT1892015	0.641088
Catabacter_hongkongensis	Chicken_stool-associated_circular_virus	0.641088
Catabacter_hongkongensis	Circular_ssDNA_virus_sp.	0.648675
Catabacter_hongkongensis	Pythium_polare_bunya-like_RNA_virus_1	0.641088
Catabacter_hongkongensis	Chimpanzee_faeces_associated_circular_DNA_virus_1	0.648675
Catabacter_hongkongensis	Camula_virus	0.641088
Catabacter_hongkongensis	Macaque_picobirnavirus_28	0.648675
Catabacter_hongkongensis	Macaque_picobirnavirus_2	0.648675
Catabacter_hongkongensis	Rodent_stool-associated_circular_genome_virus	0.641088
Catabacter_hongkongensis	Circoviridae_sp.	0.719481
Catabacter_hongkongensis	Cressdnaviricota_sp.	0.648675
Catabacter_hongkongensis	Pink-eared_duck_picobirnavirus	0.648675
Catabacter_hongkongensis	Chicken_associated_smacovirus	0.641088
Catabacter_hongkongensis	Chicken_virus_mg4_657	0.648675
Catabacter_hongkongensis	Kumba_picobirna-like_virus	0.641088
Catabacter_hongkongensis	Macaque_picobirnavirus_12	0.648675
Catabacter_hongkongensis	Tasmanian_devil-associated_picobirnavirus_1	0.641088
Catabacter_hongkongensis	Human_smacovirus_1	0.641088
Catabacter_hongkongensis	Chicken_virus_mg8_273	0.641088
Catabacter_hongkongensis	Lysoka_picobirna-like_virus	0.648675
Catabacter_hongkongensis	Kristianstad_virus	0.648675
Catabacter_hongkongensis	Microtus_picobirnavirus_V-111USA2008	0.648675
Catabacter_hongkongensis	Mischke_partiti-like_virus	0.648675
Catabacter_hongkongensis	Picobirnavirus_dogKNA2015	0.641088
Catabacter_hongkongensis	Wuhan_pillworm_virus_4	0.648675
Catabacter_hongkongensis	Prokaryotic_dsDNA_virus_sp.	0.532976
Catabacter_hongkongensis	Chicken_stool_associated_circular_virus_1	0.641088
Brachybacterium_conglomeratum	Phacovirus_TRPhV	0.502456
Clostridium_propionicum	Avian_nephritis_virus	0.522285
Clostridium_propionicum	Gammacoronavirus_sp.	0.544956
Clostridium_disporicum	Dickeya_phage_phiDP23.1	0.583016
Bacteroides_barnesiae	Bacteroides_coprocola	0.725476
Bacteroides_barnesiae	Elusimicrobium_minutum	0.725476
Bacteroides_barnesiae	Wenzhou_tombus-like_virus_2	0.725476
Bacteroides_plebeius	Megrivirus_C	0.557928
Bacteroides_plebeius	Sicinivirus_10	-0.514793
Bacteroides_plebeius	Avian_nephritis_virus	-0.522488
Bacteroides_plebeius	Chicken_picornavirus_5	0.65565
Bacteroides_plebeius	Chicken_astrovirus	-0.505746
Bacteroides_plebeius	Chicken_proventriculitis_virus	0.691883
Bacteroides_plebeius	Astrovirus_HK-2014	-0.546677
Bacteroides_plebeius	Melegrivirus_A	0.6889
Bacteroides_plebeius	Quail_picornavirus_QPV1HUN2010	-0.522035
Bacteroides_plebeius	Avian_nephritis_virus_3	-0.528106
Bacteroides_plebeius	Chicken_picornavirus_4	0.673967
Bacteroides_plebeius	Rotavirus_F	0.545752
Bacteroides_plebeius	Picobirnavirus_GIPBVturkeyUSAMN-12011	0.593468
Bacteroides_plebeius	Chicken_picornavirus_UCC13	0.83735
Bacteroides_plebeius	Pigeon-dominant_Coronavirus	0.608996
Bacteroides_plebeius	Duck-dominant_coronavirus	0.602415
Bacteroides_plebeius	Picornavirus_chickenCHK148USA2010	0.603113
Bacteroides_plebeius	Human_gut_gokushovirus	0.793946
Gallibacterium_anatis	Methanobrevibacter_woesei	0.725476
Gallibacterium_anatis	Phacovirus_CABPhV	0.580091
Gallibacterium_anatis	Chicken_proventricular_necrosis_virus	0.662666
Bacteroides_coprocola	Elusimicrobium_minutum	1
Bacteroides_coprocola	Eimeria_tenella_RNA_virus_1	0.54399
Bacteroides_coprocola	Wenzhou_tombus-like_virus_2	1
Facklamia_tabacinasalis	Avisivirus_B	0.540655
Facklamia_tabacinasalis	Picornavirales_Tottori-HG1	0.607988
Facklamia_tabacinasalis	RD114_retrovirus	0.540655
Facklamia_tabacinasalis	Picornavirales_Tottori-HG2	0.540655
Facklamia_tabacinasalis	Picobirnavirus_wolfPRT1892015	0.64911
Facklamia_tabacinasalis	Feline_endogenous_virus	0.540655
Facklamia_tabacinasalis	Chicken_stool-associated_circular_virus	0.64911
Facklamia_tabacinasalis	Circular_ssDNA_virus_sp.	0.725476
Facklamia_tabacinasalis	Pythium_polare_bunya-like_RNA_virus_1	0.64911
Facklamia_tabacinasalis	Chimpanzee_faeces_associated_circular_DNA_virus_1	0.725476
Facklamia_tabacinasalis	Camula_virus	0.64911
Facklamia_tabacinasalis	Macaque_picobirnavirus_28	0.725476
Facklamia_tabacinasalis	Macaque_picobirnavirus_2	0.725476
Facklamia_tabacinasalis	Macaque_picobirnavirus_31	0.725476
Facklamia_tabacinasalis	Merch_tombus-like_virus	1
Facklamia_tabacinasalis	Rodent_stool-associated_circular_genome_virus	0.64911
Facklamia_tabacinasalis	Dromedary_picobirnavirus	0.54399
Facklamia_tabacinasalis	Otarine_picobirnavirus	0.607988
Facklamia_tabacinasalis	Cressdnaviricota_sp.	0.725476
Facklamia_tabacinasalis	Picobirnavirus_HK-2014	0.54399
Facklamia_tabacinasalis	Orthopicobirnavirus_hominis	0.54399
Facklamia_tabacinasalis	Pink-eared_duck_picobirnavirus	0.725476
Facklamia_tabacinasalis	Macaque_picobirnavirus_25	0.54399
Facklamia_tabacinasalis	Bovine_picobirnavirus	0.607988
Facklamia_tabacinasalis	Chicken_associated_smacovirus	0.64911
Facklamia_tabacinasalis	Riboviria_sp.	0.607988
Facklamia_tabacinasalis	Baboon_endogenous_virus	0.540655
Facklamia_tabacinasalis	Avisivirus_Pf-CHK1AsV	0.540655
Facklamia_tabacinasalis	Pilk_tombus-like_virus	1
Facklamia_tabacinasalis	Shelduck_picobirnavirus_I	0.540655
Facklamia_tabacinasalis	Chicken_virus_mg4_657	0.725476
Facklamia_tabacinasalis	Kirsten_murine_sarcoma_virus	0.540655
Facklamia_tabacinasalis	Fox_picobirnavirus	0.725476
Facklamia_tabacinasalis	Mongoose_picobirnavirus	0.607988
Facklamia_tabacinasalis	Kumba_picobirna-like_virus	0.64911
Facklamia_tabacinasalis	Rabbit_picobirnavirus_5	0.540655
Facklamia_tabacinasalis	Macaque_picobirnavirus_22	1
Facklamia_tabacinasalis	Rat_picobirnavirus	0.54399
Facklamia_tabacinasalis	Macaque_picobirnavirus_12	0.725476
Facklamia_tabacinasalis	Tasmanian_devil-associated_picobirnavirus_1	0.64911
Facklamia_tabacinasalis	Chaphamaparvovirus_galliform2	0.540655
Facklamia_tabacinasalis	Macaque_picobirnavirus_34	0.725476
Facklamia_tabacinasalis	Crassvirales_sp.	1
Facklamia_tabacinasalis	Picobirnavirus_PREDICT_PbV-38	1
Facklamia_tabacinasalis	Gokushovirus_WZ-2015a	0.607988
Facklamia_tabacinasalis	Human_smacovirus_1	0.64911
Facklamia_tabacinasalis	Chicken_virus_mg8_273	0.64911
Facklamia_tabacinasalis	Lysoka_picobirna-like_virus	0.725476
Facklamia_tabacinasalis	Avian_carcinoma_virus	0.607988
Facklamia_tabacinasalis	Thornevirus_SP15	0.607988
Facklamia_tabacinasalis	Kristianstad_virus	0.725476
Facklamia_tabacinasalis	Microtus_picobirnavirus_V-111USA2008	0.725476
Facklamia_tabacinasalis	Mischke_partiti-like_virus	0.725476
Facklamia_tabacinasalis	Porcine_type-C_oncovirus	0.725476
Facklamia_tabacinasalis	Shelduck_picobirnavirus_II	0.607988
Facklamia_tabacinasalis	Picobirnavirus_dogKNA2015	0.64911
Facklamia_tabacinasalis	Chicken_microvirus_mg7_14	1
Facklamia_tabacinasalis	Macaque_picobirnavirus_9	1
Facklamia_tabacinasalis	Picobirnavirus_GIPBVbovineBRAPBV18_PR2014	1
Facklamia_tabacinasalis	Picobirnavirus_PREDICT_PbV-31	1
Facklamia_tabacinasalis	Picobirnavirus_PREDICT_PbV-36	1
Facklamia_tabacinasalis	Macaque_picobirnavirus_1	0.54399
Facklamia_tabacinasalis	Streptococcus_phage_phiJH1301-2	0.540655
Facklamia_tabacinasalis	Wuhan_pillworm_virus_4	0.725476
Facklamia_tabacinasalis	Chicken_stool_associated_circular_virus_1	0.64911
Facklamia_tabacinasalis	Streptococcus_satellite_phage_Javan285	0.540655
Facklamia_tabacinasalis	Picobirnavirus_wolfPRT11092015	0.725476
Methanobrevibacter_woesei	Gokushovirus_WZ-2015a	0.54399
Methanobrevibacter_woesei	Human_endogenous_retrovirus_K	0.54399
Elusimicrobium_minutum	Eimeria_tenella_RNA_virus_1	0.54399
Elusimicrobium_minutum	Wenzhou_tombus-like_virus_2	1
Avian_coronavirus	Picornavirus_chickenCHK1USA2010	0.526316
Avian_coronavirus	Sicinivirus_A	-0.759398
Avian_coronavirus	Sicinivirus_sp.	-0.726316
Avian_coronavirus	Chicken_picornavirus_1	-0.783459
Avian_coronavirus	Bavaria_virus	-0.679699
Avian_coronavirus	Sicinivirus_10	-0.59891
Avian_coronavirus	Sicinivirus_UCC1	-0.559398
Avian_coronavirus	Turkey_picornavirus	0.562406
Avian_coronavirus	RD114_retrovirus	-0.511946
Avian_coronavirus	Avastrovirus_2	-0.658647
Avian_coronavirus	Chicken_proventriculitis_virus	0.502423
Avian_coronavirus	Chicken_calicivirus_UCC1	-0.600803
Avian_coronavirus	Calicivirus_chickenV0021Bayern2004	-0.613589
Avian_coronavirus	Feline_endogenous_virus	-0.511946
Avian_coronavirus	Calicivirus_chickenV0027Bayern2004	-0.514712
Avian_coronavirus	Avian_nephritis_virus_3	-0.676986
Avian_coronavirus	Cryptosporidium_parvum_virus_1	0.601718
Avian_coronavirus	Baboon_endogenous_virus	-0.511946
Avian_coronavirus	Mason-Pfizer_monkey_virus	-0.52055
Avian_coronavirus	Picobirnavirus_GIPBVturkeyUSAMN-12011	0.518182
Avian_coronavirus	Drosophila_A_virus	-0.61366
Avian_coronavirus	Chicken_picornavirus_UCC13	0.503342
Avian_coronavirus	Pigeon-dominant_Coronavirus	0.635375
Avian_coronavirus	Eimeria_tenella_RNA_virus_1	-0.512812
Avian_coronavirus	Reticuloendotheliosis_virus	-0.505556
Avian_coronavirus	Enterogokushovirus_EC6098	-0.541839
Avian_coronavirus	Chicken_proventricular_necrosis_virus	0.534532
Dickeya_phage_phiDP23.1	Gallivirus_A	-0.548872
Dickeya_phage_phiDP23.1	Megrivirus_C	-0.510807
Dickeya_phage_phiDP23.1	Chicken_picornavirus_5	-0.614037
Dickeya_phage_phiDP23.1	Chicken_picobirnavirus	-0.546875
Dickeya_phage_phiDP23.1	Phacovirus_TRPhV	0.600226
Dickeya_phage_phiDP23.1	Picornavirus_chickenCHK175USA2010	-0.506404
Dickeya_phage_phiDP23.1	Benes_partiti-like_virus	-0.58757
Dickeya_phage_phiDP23.1	Shelduck_picobirnavirus_I	-0.548514
Dickeya_phage_phiDP23.1	Phacovirus_CABPhV	-0.552816
Dickeya_phage_phiDP23.1	Picornavirus_chickenCHK148USA2010	-0.556353
Dickeya_phage_phiDP23.1	Tortoise_microvirus_100	0.642306
Dickeya_phage_phiDP23.1	Escherichia_phage_1720a-02	-0.533608
Picornavirus_chickenCHK1USA2010	Sicinivirus_sp.	-0.694737
Picornavirus_chickenCHK1USA2010	Megrivirus_C	0.61013
Picornavirus_chickenCHK1USA2010	Bavaria_virus	-0.700752
Picornavirus_chickenCHK1USA2010	Sicinivirus_10	-0.588243
Picornavirus_chickenCHK1USA2010	Qubevirus_faecium	-0.507985
Picornavirus_chickenCHK1USA2010	Turkey_picornavirus	0.969925
Picornavirus_chickenCHK1USA2010	RD114_retrovirus	-0.635631
Picornavirus_chickenCHK1USA2010	Chicken_proventriculitis_virus	0.596975
Picornavirus_chickenCHK1USA2010	Rotavirus_A	0.533432
Picornavirus_chickenCHK1USA2010	Chicken_calicivirus_UCC1	-0.626496
Picornavirus_chickenCHK1USA2010	Calicivirus_chickenV0021Bayern2004	-0.509438
Picornavirus_chickenCHK1USA2010	Feline_endogenous_virus	-0.635631
Picornavirus_chickenCHK1USA2010	Calicivirus_chickenV0027Bayern2004	-0.616118
Picornavirus_chickenCHK1USA2010	Cryptosporidium_parvum_virus_1	0.734273
Picornavirus_chickenCHK1USA2010	Baboon_endogenous_virus	-0.635631
Picornavirus_chickenCHK1USA2010	Mason-Pfizer_monkey_virus	-0.631329
Picornavirus_chickenCHK1USA2010	Kirsten_murine_sarcoma_virus	-0.635631
Picornavirus_chickenCHK1USA2010	Duck-dominant_coronavirus	0.564531
Picornavirus_chickenCHK1USA2010	Eimeria_tenella_RNA_virus_1	-0.541839
Sicinivirus_A	Sicinivirus_sp.	0.596992
Sicinivirus_A	Chicken_picornavirus_1	0.768421
Sicinivirus_A	Gallivirus_Pf-CHK1GV	0.521805
Sicinivirus_A	Sicinivirus_UCC1	0.6
Sicinivirus_A	Avastrovirus_2	0.622556
Sicinivirus_A	Beihai_tombus-like_virus_15	0.594364
Sicinivirus_A	Avian_nephritis_virus_3	0.649816
Sicinivirus_A	Picornavirus_chickenCHK165USA2010	0.594721
Sicinivirus_A	Orthoavulavirus_javaense	0.620149
Sicinivirus_A	Drosophila_A_virus	0.617368
Sicinivirus_A	Enterogokushovirus_EC6098	0.51765
Sicinivirus_A	Chicken_proventricular_necrosis_virus	-0.550665
Sicinivirus_sp.	Chicken_picornavirus_1	0.84812
Sicinivirus_sp.	Bavaria_virus	0.66015
Sicinivirus_sp.	Sicinivirus_10	0.737589
Sicinivirus_sp.	Turkey_picornavirus	-0.760902
Sicinivirus_sp.	RD114_retrovirus	0.532381
Sicinivirus_sp.	Chicken_calicivirus_UCC1	0.571159
Sicinivirus_sp.	Feline_endogenous_virus	0.532381
Sicinivirus_sp.	Calicivirus_chickenV0027Bayern2004	0.62841
Sicinivirus_sp.	Avian_nephritis_virus_3	0.547928
Sicinivirus_sp.	Cryptosporidium_parvum_virus_1	-0.83148
Sicinivirus_sp.	Parabacteroides_phage_YZ-2015a	-0.68618
Sicinivirus_sp.	UR2_sarcoma_virus	-0.518903
Sicinivirus_sp.	Baboon_endogenous_virus	0.532381
Sicinivirus_sp.	Mason-Pfizer_monkey_virus	0.536683
Sicinivirus_sp.	Eimeria_brunetti_RNA_virus_1	0.515758
Sicinivirus_sp.	Kirsten_murine_sarcoma_virus	0.523777
Sicinivirus_sp.	Eimeria_tenella_RNA_virus_1	0.51765
Sicinivirus_sp.	Reticuloendotheliosis_virus	0.503137
Sicinivirus_sp.	Enterogokushovirus_EC6098	0.566029
Sicinivirus_sp.	Avian_orthoreovirus	-0.58538
Sicinivirus_sp.	Tortoise_microvirus_100	0.513845
Phacovirus_sp.	Chicken_picornavirus_UCCPhV	0.840602
Phacovirus_sp.	Phacovirus_Pf-CHK1PhV	0.866165
Phacovirus_sp.	Chicken_picornavirus_1	0.524812
Phacovirus_sp.	Megrivirus_C	-0.618013
Phacovirus_sp.	Sicinivirus_10	0.531857
Phacovirus_sp.	Posavirus_1	-0.570024
Phacovirus_sp.	Chicken_picornavirus_HK-2014	0.691729
Phacovirus_sp.	Chicken_picornavirus_5	-0.742844
Phacovirus_sp.	Chicken_picobirnavirus	-0.835071
Phacovirus_sp.	Phacovirus_VGPhV	0.691729
Phacovirus_sp.	Astrovirus_HK-2014	0.503759
Phacovirus_sp.	Marmot_picobirnavirus	-0.840308
Phacovirus_sp.	Phacovirus_TRPhV	0.639338
Phacovirus_sp.	Picobirnavirus_sp.	-0.548222
Phacovirus_sp.	Aveparvovirus_galliform1	0.634783
Phacovirus_sp.	Melegrivirus_A	-0.518182
Phacovirus_sp.	Quail_picornavirus_QPV1HUN2010	0.569061
Phacovirus_sp.	Turkey_picobirnavirus	-0.612661
Phacovirus_sp.	Avian_picobirnavirus_GI	-0.636377
Phacovirus_sp.	Sapelovirus_B	0.520036
Phacovirus_sp.	Phacovirus_DMPhV	0.560622
Phacovirus_sp.	Chicken_picornavirus_4	-0.557324
Phacovirus_sp.	Dromedary_picobirnavirus	-0.575704
Phacovirus_sp.	Otarine_picobirnavirus	-0.614407
Phacovirus_sp.	Picobirnavirus_HK-2014	-0.534583
Phacovirus_sp.	Orthopicobirnavirus_hominis	-0.553934
Phacovirus_sp.	Picornavirus_chickenCHK175USA2010	-0.566397
Phacovirus_sp.	Caudoviricetes_sp.	-0.611021
Phacovirus_sp.	Bovine_picobirnavirus	-0.527326
Phacovirus_sp.	Benes_partiti-like_virus	-0.802836
Phacovirus_sp.	Picobirnavirus_GIPBVturkeyUSAMN-12011	-0.602537
Phacovirus_sp.	Shelduck_picobirnavirus_I	-0.549589
Phacovirus_sp.	Eimeria_brunetti_RNA_virus_1	0.773637
Phacovirus_sp.	Mongoose_picobirnavirus	-0.527326
Phacovirus_sp.	Microviridae_sp.	-0.800894
Phacovirus_sp.	Rabbit_picobirnavirus_5	-0.594761
Phacovirus_sp.	Rat_picobirnavirus	-0.619245
Phacovirus_sp.	Chicken_microvirus_mg7_10	-0.667999
Phacovirus_sp.	Phacovirus_CABPhV	-0.637782
Phacovirus_sp.	Fox_fecal_picobirnavirus	-0.599063
Phacovirus_sp.	Gokushovirus_WZ-2015a	-0.611988
Phacovirus_sp.	Shelduck_picobirnavirus_II	-0.614407
Phacovirus_sp.	Podoviridae_sp._ctcf755	-0.68133
Phacovirus_sp.	Macaque_picobirnavirus_1	-0.553934
Phacovirus_sp.	Streptococcus_satellite_phage_Javan285	-0.631329
Phacovirus_sp.	Chicken_proventricular_necrosis_virus	-0.538834
Chicken_picornavirus_UCCPhV	Phacovirus_Pf-CHK1PhV	0.851128
Chicken_picornavirus_UCCPhV	Chicken_picornavirus_1	0.535338
Chicken_picornavirus_UCCPhV	Megrivirus_C	-0.501347
Chicken_picornavirus_UCCPhV	Sicinivirus_10	0.55243
Chicken_picornavirus_UCCPhV	Avian_nephritis_virus	0.515789
Chicken_picornavirus_UCCPhV	Chicken_picornavirus_HK-2014	0.813534
Chicken_picornavirus_UCCPhV	Chicken_picornavirus_5	-0.527578
Chicken_picornavirus_UCCPhV	Chicken_picobirnavirus	-0.625333
Chicken_picornavirus_UCCPhV	Avastrovirus_2	0.566917
Chicken_picornavirus_UCCPhV	Phacovirus_VGPhV	0.846617
Chicken_picornavirus_UCCPhV	Astrovirus_HK-2014	0.568421
Chicken_picornavirus_UCCPhV	Marmot_picobirnavirus	-0.632202
Chicken_picornavirus_UCCPhV	Picornavirales_sp.	0.640085
Chicken_picornavirus_UCCPhV	Aveparvovirus_galliform1	0.650908
Chicken_picornavirus_UCCPhV	Quail_picornavirus_QPV1HUN2010	0.547174
Chicken_picornavirus_UCCPhV	Sapelovirus_B	0.56175
Chicken_picornavirus_UCCPhV	Phacovirus_DMPhV	0.615169
Chicken_picornavirus_UCCPhV	Avibirnavirus_gumboroense	-0.552465
Chicken_picornavirus_UCCPhV	Tremovirus_A	0.502875
Chicken_picornavirus_UCCPhV	Avian_astrovirus	0.577508
Chicken_picornavirus_UCCPhV	Benes_partiti-like_virus	-0.566397
Chicken_picornavirus_UCCPhV	Picobirnavirus_GIPBVturkeyUSAMN-12011	-0.505204
Chicken_picornavirus_UCCPhV	Eimeria_brunetti_RNA_virus_1	0.649116
Chicken_picornavirus_UCCPhV	Microviridae_sp.	-0.707877
Chicken_picornavirus_UCCPhV	Chicken_microvirus_mg7_10	-0.626496
Chicken_picornavirus_UCCPhV	Chicken_proventricular_necrosis_virus	-0.507644
Phacovirus_Pf-CHK1PhV	Chicken_picornavirus_1	0.57594
Phacovirus_Pf-CHK1PhV	Megrivirus_C	-0.618013
Phacovirus_Pf-CHK1PhV	Sicinivirus_10	0.665202
Phacovirus_Pf-CHK1PhV	Avian_nephritis_virus	0.62406
Phacovirus_Pf-CHK1PhV	Chicken_picornavirus_HK-2014	0.655639
Phacovirus_Pf-CHK1PhV	Chicken_picornavirus_5	-0.626389
Phacovirus_Pf-CHK1PhV	Chicken_picobirnavirus	-0.676602
Phacovirus_Pf-CHK1PhV	Avastrovirus_2	0.541353
Phacovirus_Pf-CHK1PhV	Chicken_proventriculitis_virus	-0.536721
Phacovirus_Pf-CHK1PhV	Phacovirus_VGPhV	0.821053
Phacovirus_Pf-CHK1PhV	Rotavirus_D	-0.512383
Phacovirus_Pf-CHK1PhV	Astrovirus_HK-2014	0.658647
Phacovirus_Pf-CHK1PhV	Marmot_picobirnavirus	-0.676346
Phacovirus_Pf-CHK1PhV	Picornavirales_sp.	0.539185
Phacovirus_Pf-CHK1PhV	Aveparvovirus_galliform1	0.670426
Phacovirus_Pf-CHK1PhV	Melegrivirus_A	-0.513547
Phacovirus_Pf-CHK1PhV	Quail_picornavirus_QPV1HUN2010	0.636986
Phacovirus_Pf-CHK1PhV	Sapelovirus_B	0.511693
Phacovirus_Pf-CHK1PhV	Cryptosporidium_parvum_virus_1	-0.567977
Phacovirus_Pf-CHK1PhV	Avibirnavirus_gumboroense	-0.502395
Phacovirus_Pf-CHK1PhV	Tremovirus_A	0.652856
Phacovirus_Pf-CHK1PhV	Avian_astrovirus	0.616441
Phacovirus_Pf-CHK1PhV	Benes_partiti-like_virus	-0.564632
Phacovirus_Pf-CHK1PhV	Picobirnavirus_GIPBVturkeyUSAMN-12011	-0.517255
Phacovirus_Pf-CHK1PhV	Eimeria_brunetti_RNA_virus_1	0.706958
Phacovirus_Pf-CHK1PhV	Microviridae_sp.	-0.671616
Phacovirus_Pf-CHK1PhV	Chicken_microvirus_mg7_10	-0.594874
Phacovirus_Pf-CHK1PhV	Phacovirus_CABPhV	-0.566798
Phacovirus_Pf-CHK1PhV	Equine_infectious_anemia_virus	0.575111
Phacovirus_Pf-CHK1PhV	Chicken_proventricular_necrosis_virus	-0.638857
Chicken_picornavirus_1	Megrivirus_C	-0.649544
Chicken_picornavirus_1	Bavaria_virus	0.520301
Chicken_picornavirus_1	Sicinivirus_10	0.820644
Chicken_picornavirus_1	Chicken_picornavirus_5	-0.554045
Chicken_picornavirus_1	Chicken_picobirnavirus	-0.527454
Chicken_picornavirus_1	Turkey_picornavirus	-0.511278
Chicken_picornavirus_1	Avastrovirus_2	0.645113
Chicken_picornavirus_1	Chicken_proventriculitis_virus	-0.583997
Chicken_picornavirus_1	Marmot_picobirnavirus	-0.638508
Chicken_picornavirus_1	Calicivirus_chickenV0027Bayern2004	0.519321
Chicken_picornavirus_1	Aveparvovirus_galliform1	0.53719
Chicken_picornavirus_1	Quail_picornavirus_QPV1HUN2010	0.550193
Chicken_picornavirus_1	Avian_nephritis_virus_3	0.726043
Chicken_picornavirus_1	Cryptosporidium_parvum_virus_1	-0.766407
Chicken_picornavirus_1	Picobirnavirus_GIPBVturkeyUSAMN-12011	-0.551553
Chicken_picornavirus_1	Eimeria_brunetti_RNA_virus_1	0.701335
Chicken_picornavirus_1	Chicken_microvirus_mg7_10	-0.569182
Chicken_picornavirus_1	Chicken_proventricular_necrosis_virus	-0.597988
Gallivirus_A	Megrivirus_C	0.685805
Gallivirus_A	Gallivirus_Pf-CHK1GV	0.730827
Gallivirus_A	Sicinivirus_10	-0.542524
Gallivirus_A	Picornavirales_Tottori-HG1	0.575704
Gallivirus_A	Chicken_picobirnavirus	0.530562
Gallivirus_A	Rotavirus_A	0.55432
Gallivirus_A	Picobirnavirus_wolfPRT1892015	0.520988
Gallivirus_A	Marmot_picobirnavirus	0.565986
Gallivirus_A	Chicken_stool-associated_circular_virus	0.520988
Gallivirus_A	Circular_ssDNA_virus_sp.	0.518102
Gallivirus_A	Aveparvovirus_galliform1	-0.570287
Gallivirus_A	Pythium_polare_bunya-like_RNA_virus_1	0.520988
Gallivirus_A	Chicken_gallivirus_1	0.798956
Gallivirus_A	Turkey_picobirnavirus	0.545466
Gallivirus_A	Chimpanzee_faeces_associated_circular_DNA_virus_1	0.518102
Gallivirus_A	Camula_virus	0.520988
Gallivirus_A	Picornavirus_chickenCHK165USA2010	0.645288
Gallivirus_A	Macaque_picobirnavirus_28	0.518102
Gallivirus_A	Macaque_picobirnavirus_2	0.518102
Gallivirus_A	Rodent_stool-associated_circular_genome_virus	0.520988
Gallivirus_A	Cressdnaviricota_sp.	0.518102
Gallivirus_A	Picornavirus_chickenCHK175USA2010	0.642269
Gallivirus_A	Caudoviricetes_sp.	0.608475
Gallivirus_A	Pink-eared_duck_picobirnavirus	0.518102
Gallivirus_A	Macaque_picobirnavirus_25	0.578123
Gallivirus_A	Bovine_picobirnavirus	0.553934
Gallivirus_A	Chicken_associated_smacovirus	0.520988
Gallivirus_A	Benes_partiti-like_virus	0.525814
Gallivirus_A	Shelduck_picobirnavirus_I	0.585082
Gallivirus_A	Eimeria_brunetti_RNA_virus_1	-0.56155
Gallivirus_A	Chicken_virus_mg4_657	0.518102
Gallivirus_A	Mongoose_picobirnavirus	0.553934
Gallivirus_A	Kumba_picobirna-like_virus	0.520988
Gallivirus_A	Rabbit_picobirnavirus_5	0.517324
Gallivirus_A	Macaque_picobirnavirus_12	0.518102
Gallivirus_A	Tasmanian_devil-associated_picobirnavirus_1	0.520988
Gallivirus_A	Fox_fecal_picobirnavirus	0.519475
Gallivirus_A	Human_smacovirus_1	0.520988
Gallivirus_A	Chicken_virus_mg8_273	0.520988
Gallivirus_A	Lysoka_picobirna-like_virus	0.518102
Gallivirus_A	Kristianstad_virus	0.518102
Gallivirus_A	Microtus_picobirnavirus_V-111USA2008	0.518102
Gallivirus_A	Mischke_partiti-like_virus	0.518102
Gallivirus_A	Picobirnavirus_dogKNA2015	0.520988
Gallivirus_A	Tortoise_microvirus_100	-0.608709
Gallivirus_A	Wuhan_pillworm_virus_4	0.518102
Gallivirus_A	Chicken_stool_associated_circular_virus_1	0.520988
Megrivirus_C	Sicinivirus_10	-0.809248
Megrivirus_C	Chicken_picornavirus_5	0.801008
Megrivirus_C	Chicken_picobirnavirus	0.599413
Megrivirus_C	Turkey_picornavirus	0.55495
Megrivirus_C	Chicken_proventriculitis_virus	0.813446
Megrivirus_C	Rotavirus_A	0.642642
Megrivirus_C	Marmot_picobirnavirus	0.67438
Megrivirus_C	Aveparvovirus_galliform1	-0.533837
Megrivirus_C	Melegrivirus_A	0.7425
Megrivirus_C	Quail_picornavirus_QPV1HUN2010	-0.625888
Megrivirus_C	Turkey_picobirnavirus	0.532507
Megrivirus_C	Chicken_picornavirus_4	0.743852
Megrivirus_C	Cryptosporidium_parvum_virus_1	0.726867
Megrivirus_C	Rotavirus_F	0.612271
Megrivirus_C	Picornavirus_chickenCHK175USA2010	0.595668
Megrivirus_C	Caudoviricetes_sp.	0.661957
Megrivirus_C	Benes_partiti-like_virus	0.710362
Megrivirus_C	Picobirnavirus_GIPBVturkeyUSAMN-12011	0.619074
Megrivirus_C	Eimeria_brunetti_RNA_virus_1	-0.767296
Megrivirus_C	Chicken_picornavirus_UCC13	0.694595
Megrivirus_C	Phacovirus_CABPhV	0.601005
Megrivirus_C	Picornavirus_chickenCHK148USA2010	0.603577
Megrivirus_C	Chicken_proventricular_necrosis_virus	0.643853
Gallivirus_Pf-CHK1GV	Sicinivirus_UCC1	0.78797
Gallivirus_Pf-CHK1GV	Orivirus_A	0.709228
Gallivirus_Pf-CHK1GV	Beihai_tombus-like_virus_15	0.638508
Gallivirus_Pf-CHK1GV	Phacovirus_VGPhV	-0.538346
Gallivirus_Pf-CHK1GV	Chicken_calicivirus_UCC1	0.533608
Gallivirus_Pf-CHK1GV	Chicken_gallivirus_1	0.81893
Gallivirus_Pf-CHK1GV	Picornavirus_chickenCHK165USA2010	0.742647
Gallivirus_Pf-CHK1GV	Phacovirus_DMPhV	-0.500014
Gallivirus_Pf-CHK1GV	Riboviria_sp.	0.524907
Gallivirus_Pf-CHK1GV	Eimeria_tenella_RNA_virus_1	0.512812
Bavaria_virus	Sicinivirus_10	0.511284
Bavaria_virus	Turkey_picornavirus	-0.681203
Bavaria_virus	RD114_retrovirus	0.577553
Bavaria_virus	Chicken_calicivirus_UCC1	0.606732
Bavaria_virus	Calicivirus_chickenV0021Bayern2004	0.698873
Bavaria_virus	Feline_endogenous_virus	0.577553
Bavaria_virus	Calicivirus_chickenV0027Bayern2004	0.786664
Bavaria_virus	Quail_picornavirus_QPV1HUN2010	0.540381
Bavaria_virus	Cryptosporidium_parvum_virus_1	-0.64992
Bavaria_virus	Baboon_endogenous_virus	0.577553
Bavaria_virus	Mason-Pfizer_monkey_virus	0.586157
Bavaria_virus	Kirsten_murine_sarcoma_virus	0.586157
Bavaria_virus	Pigeon-dominant_Coronavirus	-0.632083
Bavaria_virus	Calicivirus_chickenV0013Bayern2004	0.637782
Bavaria_virus	Eimeria_tenella_RNA_virus_1	0.541839
Bavaria_virus	Reticuloendotheliosis_virus	0.507974
Avisivirus_B	Avian_nephritis_virus	0.557118
Avisivirus_B	Picornavirales_Tottori-HG1	0.593411
Avisivirus_B	Chicken_astrovirus	0.536885
Avisivirus_B	Picornavirales_Tottori-HG2	0.5
Avisivirus_B	Picobirnavirus_wolfPRT1892015	0.741113
Avisivirus_B	Chicken_stool-associated_circular_virus	0.741113
Avisivirus_B	Circular_ssDNA_virus_sp.	0.745241
Avisivirus_B	Pythium_polare_bunya-like_RNA_virus_1	0.741113
Avisivirus_B	Chimpanzee_faeces_associated_circular_DNA_virus_1	0.745241
Avisivirus_B	Camula_virus	0.741113
Avisivirus_B	Picornavirus_chickenCHK165USA2010	0.585134
Avisivirus_B	Macaque_picobirnavirus_28	0.745241
Avisivirus_B	Macaque_picobirnavirus_2	0.745241
Avisivirus_B	Merch_tombus-like_virus	0.540655
Avisivirus_B	Avastrovirus_1	0.647745
Avisivirus_B	Rodent_stool-associated_circular_genome_virus	0.741113
Avisivirus_B	Dromedary_picobirnavirus	0.589951
Avisivirus_B	Otarine_picobirnavirus	0.593411
Avisivirus_B	Cressdnaviricota_sp.	0.745241
Avisivirus_B	Picobirnavirus_HK-2014	0.517289
Avisivirus_B	Orthopicobirnavirus_hominis	0.589951
Avisivirus_B	Caudoviricetes_sp.	0.526238
Avisivirus_B	Pink-eared_duck_picobirnavirus	0.745241
Avisivirus_B	Macaque_picobirnavirus_25	0.589951
Avisivirus_B	Bovine_picobirnavirus	0.593411
Avisivirus_B	Chicken_associated_smacovirus	0.741113
Avisivirus_B	Riboviria_sp.	0.593411
Avisivirus_B	Pilk_tombus-like_virus	0.540655
Avisivirus_B	Shelduck_picobirnavirus_I	0.5
Avisivirus_B	Chicken_virus_mg4_657	0.745241
Avisivirus_B	Mongoose_picobirnavirus	0.593411
Avisivirus_B	Kumba_picobirna-like_virus	0.741113
Avisivirus_B	Rabbit_picobirnavirus_5	0.5
Avisivirus_B	Macaque_picobirnavirus_22	0.540655
Avisivirus_B	Rat_picobirnavirus	0.589951
Avisivirus_B	Kehishuvirus_primarius	0.564208
Avisivirus_B	Macaque_picobirnavirus_12	0.745241
Avisivirus_B	Tasmanian_devil-associated_picobirnavirus_1	0.741113
Avisivirus_B	Crassvirales_sp.	0.540655
Avisivirus_B	Picobirnavirus_PREDICT_PbV-38	0.540655
Avisivirus_B	Gokushovirus_WZ-2015a	0.55708
Avisivirus_B	Human_smacovirus_1	0.741113
Avisivirus_B	Chicken_virus_mg8_273	0.741113
Avisivirus_B	Lysoka_picobirna-like_virus	0.745241
Avisivirus_B	Kristianstad_virus	0.745241
Avisivirus_B	Microtus_picobirnavirus_V-111USA2008	0.745241
Avisivirus_B	Mischke_partiti-like_virus	0.745241
Avisivirus_B	Shelduck_picobirnavirus_II	0.593411
Avisivirus_B	Picobirnavirus_dogKNA2015	0.741113
Avisivirus_B	Chicken_microvirus_mg7_14	0.540655
Avisivirus_B	Macaque_picobirnavirus_9	0.540655
Avisivirus_B	Picobirnavirus_GIPBVbovineBRAPBV18_PR2014	0.540655
Avisivirus_B	Picobirnavirus_PREDICT_PbV-31	0.540655
Avisivirus_B	Picobirnavirus_PREDICT_PbV-36	0.540655
Avisivirus_B	Macaque_picobirnavirus_1	0.589951
Avisivirus_B	Wuhan_pillworm_virus_4	0.745241
Avisivirus_B	Chicken_stool_associated_circular_virus_1	0.741113
Avisivirus_B	Streptococcus_satellite_phage_Javan285	0.5
Sicinivirus_10	Chicken_picornavirus_5	-0.563271
Sicinivirus_10	Chicken_picobirnavirus	-0.542801
Sicinivirus_10	Turkey_picornavirus	-0.604244
Sicinivirus_10	Chicken_proventriculitis_virus	-0.639747
Sicinivirus_10	Rotavirus_A	-0.663122
Sicinivirus_10	Marmot_picobirnavirus	-0.678235
Sicinivirus_10	Aveparvovirus_galliform1	0.677276
Sicinivirus_10	Melegrivirus_A	-0.567411
Sicinivirus_10	Quail_picornavirus_QPV1HUN2010	0.590467
Sicinivirus_10	Avian_nephritis_virus_3	0.613412
Sicinivirus_10	Chicken_picornavirus_4	-0.544777
Sicinivirus_10	Cryptosporidium_parvum_virus_1	-0.849968
Sicinivirus_10	Tremovirus_A	0.595458
Sicinivirus_10	Rotavirus_F	-0.572108
Sicinivirus_10	Picobirnavirus_GIPBVturkeyUSAMN-12011	-0.501652
Sicinivirus_10	Eimeria_brunetti_RNA_virus_1	0.790128
Sicinivirus_10	Chicken_picornavirus_UCC13	-0.610375
Sicinivirus_10	Duck-dominant_coronavirus	-0.522789
Sicinivirus_10	Equine_infectious_anemia_virus	0.61688
Avian_nephritis_virus	Chicken_astrovirus	0.870252
Avian_nephritis_virus	Avastrovirus_2	0.760902
Avian_nephritis_virus	Chicken_proventriculitis_virus	-0.634054
Avian_nephritis_virus	Phacovirus_VGPhV	0.593985
Avian_nephritis_virus	Astrovirus_HK-2014	0.771429
Avian_nephritis_virus	Avian_nephritis_virus_3	0.714722
Avian_nephritis_virus	Avibirnavirus_gumboroense	-0.678064
Avian_nephritis_virus	Tremovirus_A	0.631682
Avian_nephritis_virus	Avian_astrovirus	0.571946
Avian_nephritis_virus	Picobirnavirus_GIPBVturkeyUSAMN-12011	-0.534867
Avian_nephritis_virus	Chicken_picornavirus_UCC13	-0.622725
Avian_nephritis_virus	Equine_infectious_anemia_virus	0.533608
Avian_nephritis_virus	Chicken_proventricular_necrosis_virus	-0.663594
Posavirus_1	Chicken_picornavirus_5	0.538868
Posavirus_1	Picornavirales_Tottori-HG1	0.885792
Posavirus_1	Chicken_picobirnavirus	0.642262
Posavirus_1	Picornavirales_Tottori-HG2	0.774615
Posavirus_1	Picobirnavirus_wolfPRT1892015	0.745241
Posavirus_1	Marmot_picobirnavirus	0.692339
Posavirus_1	Phacovirus_TRPhV	-0.64125
Posavirus_1	Picobirnavirus_sp.	0.549303
Posavirus_1	Chicken_stool-associated_circular_virus	0.745241
Posavirus_1	Circular_ssDNA_virus_sp.	0.741113
Posavirus_1	Pythium_polare_bunya-like_RNA_virus_1	0.745241
Posavirus_1	Porcine_picobirnavirus	0.744655
Posavirus_1	Turkey_picobirnavirus	0.675656
Posavirus_1	Chimpanzee_faeces_associated_circular_DNA_virus_1	0.741113
Posavirus_1	Camula_virus	0.745241
Posavirus_1	Avian_picobirnavirus_GI	0.91878
Posavirus_1	Macaque_picobirnavirus_28	0.741113
Posavirus_1	Macaque_picobirnavirus_2	0.741113
Posavirus_1	Rodent_stool-associated_circular_genome_virus	0.745241
Posavirus_1	Leviviridae_sp.	0.540655
Posavirus_1	Dromedary_picobirnavirus	0.593411
Posavirus_1	Otarine_picobirnavirus	0.854651
Posavirus_1	Cressdnaviricota_sp.	0.741113
Posavirus_1	Picobirnavirus_HK-2014	0.513829
Posavirus_1	Orthopicobirnavirus_hominis	0.593411
Posavirus_1	Picornavirus_chickenCHK175USA2010	0.531296
Posavirus_1	Beihai_blue_swimmer_crab_virus_2	0.540655
Posavirus_1	Caudoviricetes_sp.	0.717432
Posavirus_1	Pink-eared_duck_picobirnavirus	0.741113
Posavirus_1	Duck_astrovirus_CPH	0.540655
Posavirus_1	Macaque_picobirnavirus_25	0.889252
Posavirus_1	Bovine_picobirnavirus	0.589951
Posavirus_1	Chicken_associated_smacovirus	0.745241
Posavirus_1	Wuhan_spider_virus_10	0.540655
Posavirus_1	Benes_partiti-like_virus	0.702927
Posavirus_1	Riboviria_sp.	0.589951
Posavirus_1	Wuhan_insect_virus_23	0.540655
Posavirus_1	Picobirnavirus_GIPBVturkeyUSAMN-12011	0.511168
Posavirus_1	Chicken_virus_mg4_657	0.741113
Posavirus_1	Microviridae_phi-CA82	0.665385
Posavirus_1	Halophytophthora_RNA_virus_7	0.540655
Posavirus_1	Fox_picobirnavirus	0.662666
Posavirus_1	Mongoose_picobirnavirus	0.589951
Posavirus_1	Fisa-like_virus	0.540655
Posavirus_1	Kumba_picobirna-like_virus	0.745241
Posavirus_1	Bacteriophage_sp.	0.619899
Posavirus_1	Microviridae_sp.	0.573943
Posavirus_1	Rat_picobirnavirus	0.858111
Posavirus_1	Picobirnavirus_PREDICT_PbV-116	0.540655
Posavirus_1	Macaque_picobirnavirus_12	0.741113
Posavirus_1	Tasmanian_devil-associated_picobirnavirus_1	0.745241
Posavirus_1	Fox_fecal_picobirnavirus	0.5
Posavirus_1	Macaque_picobirnavirus_34	0.662666
Posavirus_1	Grey_teal_picobirnavirus_y	0.540655
Posavirus_1	Jiangxia_Mosquito_Virus_1	0.540655
Posavirus_1	Gokushovirus_WZ-2015a	0.84427
Posavirus_1	Human_smacovirus_1	0.745241
Posavirus_1	Chicken_virus_mg8_273	0.745241
Posavirus_1	Lysoka_picobirna-like_virus	0.741113
Posavirus_1	Avastrovirus_3	0.540655
Posavirus_1	Kristianstad_virus	0.741113
Posavirus_1	Guangdong_chinese_water_skink_picobirnavirus	0.697761
Posavirus_1	Goose_astrovirus	0.540655
Posavirus_1	Microtus_picobirnavirus_V-111USA2008	0.741113
Posavirus_1	Mischke_partiti-like_virus	0.741113
Posavirus_1	Shelduck_picobirnavirus_II	0.854651
Posavirus_1	Podoviridae_sp._ctcf755	0.831394
Posavirus_1	Picobirnavirus_dogKNA2015	0.745241
Posavirus_1	Macaque_picobirnavirus_1	0.593411
Posavirus_1	Wuhan_pillworm_virus_4	0.741113
Posavirus_1	Chicken_stool_associated_circular_virus_1	0.745241
Posavirus_1	Picobirnavirus_wolfPRT11092015	0.662666
Posavirus_1	Bovine_serum-associated_circular_virus	0.540655
Qubevirus_faecium	Sicinivirus_UCC1	0.565458
Qubevirus_faecium	RD114_retrovirus	0.548296
Qubevirus_faecium	Orivirus_A	0.567447
Qubevirus_faecium	Beihai_tombus-like_virus_15	0.504395
Qubevirus_faecium	Calicivirus_chickenV0021Bayern2004	0.552708
Qubevirus_faecium	Feline_endogenous_virus	0.548296
Qubevirus_faecium	Rotavirus_G	0.549286
Qubevirus_faecium	Porcine_picobirnavirus	-0.594271
Qubevirus_faecium	Orthoavulavirus_javaense	0.726286
Qubevirus_faecium	Caudoviricetes_sp.	-0.502212
Qubevirus_faecium	Baboon_endogenous_virus	0.548296
Qubevirus_faecium	Rabbit_picobirnavirus_7	0.777269
Qubevirus_faecium	Mason-Pfizer_monkey_virus	0.576141
Qubevirus_faecium	Kirsten_murine_sarcoma_virus	0.548296
Qubevirus_faecium	Calicivirus_chickenV0013Bayern2004	0.505864
Qubevirus_faecium	Eimeria_tenella_RNA_virus_1	0.673989
Qubevirus_faecium	Reticuloendotheliosis_virus	0.763457
Qubevirus_faecium	Enterogokushovirus_EC6098	0.739599
Qubevirus_faecium	Bloomfield_virus	0.608511
Chicken_picornavirus_HK-2014	Sicinivirus_UCC1	-0.521805
Chicken_picornavirus_HK-2014	Beihai_tombus-like_virus_15	-0.507653
Chicken_picornavirus_HK-2014	Phacovirus_VGPhV	0.621053
Chicken_picornavirus_HK-2014	Marmot_picobirnavirus	-0.512383
Chicken_picornavirus_HK-2014	Picobirnavirus_sp.	-0.510033
Chicken_picornavirus_HK-2014	Picornavirales_sp.	0.536032
Chicken_picornavirus_HK-2014	Aveparvovirus_galliform1	0.637329
Chicken_picornavirus_HK-2014	Phacovirus_DMPhV	0.50153
Chicken_picornavirus_HK-2014	Campylobacter_phage_DA10	0.651091
Chicken_picornavirus_HK-2014	Rabbit_picobirnavirus_7	-0.541514
Chicken_picornavirus_HK-2014	Eimeria_brunetti_RNA_virus_1	0.534236
Chicken_picornavirus_HK-2014	Microviridae_sp.	-0.540761
Chicken_picornavirus_HK-2014	Thornevirus_SP15	-0.534583
Chicken_picornavirus_HK-2014	Podoviridae_sp._ctcf755	-0.545064
Chicken_picornavirus_5	Chicken_picobirnavirus	0.816696
Chicken_picornavirus_5	Avastrovirus_2	-0.554045
Chicken_picornavirus_5	Chicken_proventriculitis_virus	0.737458
Chicken_picornavirus_5	Astrovirus_HK-2014	-0.550516
Chicken_picornavirus_5	Marmot_picobirnavirus	0.813957
Chicken_picornavirus_5	Phacovirus_TRPhV	-0.707821
Chicken_picornavirus_5	Melegrivirus_A	0.819035
Chicken_picornavirus_5	Rotavirus_G	-0.507246
Chicken_picornavirus_5	Porcine_picobirnavirus	0.714525
Chicken_picornavirus_5	Turkey_picobirnavirus	0.730477
Chicken_picornavirus_5	Avian_picobirnavirus_GI	0.640037
Chicken_picornavirus_5	Chicken_picornavirus_4	0.885848
Chicken_picornavirus_5	Dromedary_picobirnavirus	0.550632
Chicken_picornavirus_5	Murine_picobirnavirus_3	0.572367
Chicken_picornavirus_5	Picornavirus_chickenCHK175USA2010	0.819876
Chicken_picornavirus_5	Caudoviricetes_sp.	0.632317
Chicken_picornavirus_5	Bovine_picobirnavirus	0.564824
Chicken_picornavirus_5	Benes_partiti-like_virus	0.933747
Chicken_picornavirus_5	Picobirnavirus_GIPBVturkeyUSAMN-12011	0.795106
Chicken_picornavirus_5	Eimeria_brunetti_RNA_virus_1	-0.659852
Chicken_picornavirus_5	Microviridae_phi-CA82	0.595658
Chicken_picornavirus_5	Mongoose_picobirnavirus	0.564824
Chicken_picornavirus_5	Microviridae_sp.	0.723312
Chicken_picornavirus_5	Chicken_picornavirus_UCC13	0.77486
Chicken_picornavirus_5	Rabbit_picobirnavirus_5	0.660019
Chicken_picornavirus_5	Chicken_microvirus_mg7_10	0.605252
Chicken_picornavirus_5	Phacovirus_CABPhV	0.754668
Chicken_picornavirus_5	Fox_fecal_picobirnavirus	0.670115
Chicken_picornavirus_5	Picornavirus_chickenCHK148USA2010	0.726607
Chicken_picornavirus_5	Streptococcus_phage_phiSC070807	0.572367
Chicken_picornavirus_5	Podoviridae_sp._ctcf755	0.564514
Chicken_picornavirus_5	Streptococcus_satellite_phage_Javan285	0.638565
Chicken_picornavirus_5	Chicken_proventricular_necrosis_virus	0.71807
Chicken_picornavirus_5	Human_gut_gokushovirus	0.501244
Picornavirales_Tottori-HG1	Chicken_picobirnavirus	0.594794
Picornavirales_Tottori-HG1	Picornavirales_Tottori-HG2	0.889252
Picornavirales_Tottori-HG1	Picobirnavirus_wolfPRT1892015	0.833411
Picornavirales_Tottori-HG1	Marmot_picobirnavirus	0.651762
Picornavirales_Tottori-HG1	Phacovirus_TRPhV	-0.598909
Picornavirales_Tottori-HG1	Picobirnavirus_sp.	0.674365
Picornavirales_Tottori-HG1	Chicken_stool-associated_circular_virus	0.833411
Picornavirales_Tottori-HG1	Circular_ssDNA_virus_sp.	0.838054
Picornavirales_Tottori-HG1	Avian_leukosis_virus	-0.515231
Picornavirales_Tottori-HG1	Pythium_polare_bunya-like_RNA_virus_1	0.833411
Picornavirales_Tottori-HG1	Porcine_picobirnavirus	0.66423
Picornavirales_Tottori-HG1	Turkey_picobirnavirus	0.785236
Picornavirales_Tottori-HG1	Chimpanzee_faeces_associated_circular_DNA_virus_1	0.838054
Picornavirales_Tottori-HG1	Camula_virus	0.833411
Picornavirales_Tottori-HG1	Picornavirus_chickenCHK165USA2010	0.599734
Picornavirales_Tottori-HG1	Avian_picobirnavirus_GI	0.813848
Picornavirales_Tottori-HG1	Emesvirus_zinderi	0.513829
Picornavirales_Tottori-HG1	Macaque_picobirnavirus_28	0.838054
Picornavirales_Tottori-HG1	Macaque_picobirnavirus_2	0.838054
Picornavirales_Tottori-HG1	Merch_tombus-like_virus	0.607988
Picornavirales_Tottori-HG1	Rodent_stool-associated_circular_genome_virus	0.833411
Picornavirales_Tottori-HG1	Leviviridae_sp.	0.54399
Picornavirales_Tottori-HG1	Dromedary_picobirnavirus	0.680934
Picornavirales_Tottori-HG1	Otarine_picobirnavirus	0.684825
Picornavirales_Tottori-HG1	Cressdnaviricota_sp.	0.838054
Picornavirales_Tottori-HG1	Picobirnavirus_HK-2014	0.603113
Picornavirales_Tottori-HG1	Orthopicobirnavirus_hominis	0.680934
Picornavirales_Tottori-HG1	Picornavirus_chickenCHK175USA2010	0.644296
Picornavirales_Tottori-HG1	Beihai_blue_swimmer_crab_virus_2	0.54399
Picornavirales_Tottori-HG1	Caudoviricetes_sp.	0.627951
Picornavirales_Tottori-HG1	Pink-eared_duck_picobirnavirus	0.838054
Picornavirales_Tottori-HG1	Duck_astrovirus_CPH	0.54399
Picornavirales_Tottori-HG1	Macaque_picobirnavirus_25	0.996109
Picornavirales_Tottori-HG1	Bovine_picobirnavirus	0.684825
Picornavirales_Tottori-HG1	Chicken_associated_smacovirus	0.833411
Picornavirales_Tottori-HG1	Wuhan_spider_virus_10	0.54399
Picornavirales_Tottori-HG1	Benes_partiti-like_virus	0.624428
Picornavirales_Tottori-HG1	Riboviria_sp.	0.684825
Picornavirales_Tottori-HG1	Wuhan_insect_virus_23	0.54399
Picornavirales_Tottori-HG1	Avisivirus_Pf-CHK1AsV	0.55881
Picornavirales_Tottori-HG1	Pilk_tombus-like_virus	0.607988
Picornavirales_Tottori-HG1	Shelduck_picobirnavirus_I	0.593411
Picornavirales_Tottori-HG1	Chicken_virus_mg4_657	0.838054
Picornavirales_Tottori-HG1	Halophytophthora_RNA_virus_7	0.54399
Picornavirales_Tottori-HG1	Fox_picobirnavirus	0.793946
Picornavirales_Tottori-HG1	Mongoose_picobirnavirus	0.684825
Picornavirales_Tottori-HG1	Fisa-like_virus	0.54399
Picornavirales_Tottori-HG1	Kumba_picobirna-like_virus	0.833411
Picornavirales_Tottori-HG1	Bacteriophage_sp.	0.739599
Picornavirales_Tottori-HG1	Microviridae_sp.	0.53764
Picornavirales_Tottori-HG1	Rabbit_picobirnavirus_5	0.593411
Picornavirales_Tottori-HG1	Macaque_picobirnavirus_22	0.607988
Picornavirales_Tottori-HG1	Rat_picobirnavirus	0.680934
Picornavirales_Tottori-HG1	Picobirnavirus_PREDICT_PbV-116	0.54399
Picornavirales_Tottori-HG1	Macaque_picobirnavirus_12	0.838054
Picornavirales_Tottori-HG1	Tasmanian_devil-associated_picobirnavirus_1	0.833411
Picornavirales_Tottori-HG1	Fox_fecal_picobirnavirus	0.589951
Picornavirales_Tottori-HG1	Macaque_picobirnavirus_34	0.793946
Picornavirales_Tottori-HG1	Grey_teal_picobirnavirus_y	0.54399
Picornavirales_Tottori-HG1	Jiangxia_Mosquito_Virus_1	0.54399
Picornavirales_Tottori-HG1	Crassvirales_sp.	0.607988
Picornavirales_Tottori-HG1	Picobirnavirus_PREDICT_PbV-38	0.607988
Picornavirales_Tottori-HG1	Gokushovirus_WZ-2015a	0.645914
Picornavirales_Tottori-HG1	Human_smacovirus_1	0.833411
Picornavirales_Tottori-HG1	Chicken_virus_mg8_273	0.833411
Picornavirales_Tottori-HG1	Lysoka_picobirna-like_virus	0.838054
Picornavirales_Tottori-HG1	Avastrovirus_3	0.54399
Picornavirales_Tottori-HG1	Kristianstad_virus	0.838054
Picornavirales_Tottori-HG1	Guangdong_chinese_water_skink_picobirnavirus	0.740552
Picornavirales_Tottori-HG1	Goose_astrovirus	0.54399
Picornavirales_Tottori-HG1	Microtus_picobirnavirus_V-111USA2008	0.838054
Picornavirales_Tottori-HG1	Mischke_partiti-like_virus	0.838054
Picornavirales_Tottori-HG1	Shelduck_picobirnavirus_II	0.684825
Picornavirales_Tottori-HG1	Podoviridae_sp._ctcf755	0.712758
Picornavirales_Tottori-HG1	Picobirnavirus_dogKNA2015	0.833411
Picornavirales_Tottori-HG1	Chicken_microvirus_mg7_14	0.607988
Picornavirales_Tottori-HG1	Macaque_picobirnavirus_9	0.607988
Picornavirales_Tottori-HG1	Picobirnavirus_GIPBVbovineBRAPBV18_PR2014	0.607988
Picornavirales_Tottori-HG1	Picobirnavirus_PREDICT_PbV-31	0.607988
Picornavirales_Tottori-HG1	Picobirnavirus_PREDICT_PbV-36	0.607988
Picornavirales_Tottori-HG1	Macaque_picobirnavirus_1	0.680934
Picornavirales_Tottori-HG1	Wuhan_pillworm_virus_4	0.838054
Picornavirales_Tottori-HG1	Chicken_stool_associated_circular_virus_1	0.833411
Picornavirales_Tottori-HG1	Streptococcus_satellite_phage_Javan285	0.593411
Picornavirales_Tottori-HG1	Picobirnavirus_wolfPRT11092015	0.793946
Picornavirales_Tottori-HG1	Bovine_serum-associated_circular_virus	0.54399
Chicken_picobirnavirus	Phacovirus_VGPhV	-0.541437
Chicken_picobirnavirus	Picobirnavirus_wolfPRT1892015	0.538263
Chicken_picobirnavirus	Marmot_picobirnavirus	0.892604
[truncated: 3,552 more rows]
