# Supplementary material for: Akkermansia muciniphila Enhances Resistance to Infectious Bronchitis Virus in Chickens Through γ-Aminobutyric Acid-Mediated Anti-Inflammatory Pathways
Source: Research Square preprint supplement (doi:10.21203/rs.3.rs-6786224/v1), 2025-06-25
Supplement: Supplementary file 7 [file ac1378206110a1e63f2f3b07.xlsx]

## Sheet: Sheet1
Table S8. Differentially expressed metabolites between adult and young chicken groups.
Metabolite ID	Name	KEGG ID	HMDB ID	Log2FC	Q-value	Ratio	VIP
B100012	Azelaic acid	C08261	HMDB0000784	2.14004	9.47544e-14	4.40775	1.40346
B100021	Cytosine	C00380	HMDB0000630	-3.90927	1.22421e-15	0.0665569	1.85841
B100022	L-Serine	C00065	HMDB0000187	-2.29045	1.35302e-11	0.204412	1.35061
B100027	Adipic acid	C06104	HMDB0000448	2.06145	5.45771e-07	4.17407	1.39547
B100035	Gluconic acid	C00257	HMDB0000625	2.16905	8.53598e-10	4.49726	1.38271
B100039	N-Acetyl-L-phenylalanine	C03519	HMDB0000512	-2.13822	6.62254e-05	0.227159	1.04457
B100040	Mandelic acid	C01984	HMDB0000703	-1.55531	2.78823e-09	0.340256	1.08617
B100045	5'-Methylthioadenosine	C00170	HMDB0001173	-3.07587	1.5971e-06	0.118596	1.29224
B100047	Orotic acid	C00295	HMDB0000226	-4.26796	3.71302e-13	0.0519058	1.97807
B100056	L-Tryptophan	C00078	HMDB0000929	-2.88167	5.42791e-06	0.135685	1.26182
B100064	L-Phenylalanine	C00079	HMDB0000159	-2.36155	8.16248e-07	0.194582	1.22606
B100069	Creatine	C00300	HMDB0000064	-2.74522	1.98497e-07	0.149144	1.43675
B100085	L-Tyrosine	C00082	HMDB0000158	-2.74296	0.000210132	0.149378	1.09289
B100096	3-(2-Hydroxyphenyl)propanoic acid	C01198	HMDB0033752	2.29344	3.07359e-13	4.90224	1.46096
B100102	Mannitol	C00392	HMDB0000765	-5.84773	0.00208604	0.0173644	1.38591
B100112	Creatinine	C00791	HMDB0000562	-1.80427	1.53787e-06	0.286325	1.11091
B100127	Pimelic acid	C02656	HMDB0000857	3.02103	8.7526e-09	8.11746	1.90182
B100168	gamma-Aminobutyric acid	C00334	HMDB0000112	2.32634	1.55332e-06	0.199389	1.11998
B100195	Suberic acid	C08278	HMDB0000893	1.45301	3.29115e-11	2.73779	1.11712
B100204	Pipecolic acid	C00408	HMDB0000070	-1.98302	3.23407e-08	0.25296	1.15406
B100215	p-Octopamine	C04227	HMDB0004825	-2.95098	7.4332e-07	0.129321	1.35897
B100216	N-alpha-Acetyl-L-lysine	C12989	HMDB0000446	-1.73799	2.75647e-09	0.299787	1.13557
B100217	O-Acetylserine	C00979	HMDB0003011	-1.55812	5.65914e-06	0.339594	1.03025
B100232	Tryptamine	C00398	HMDB0000303	5.51014	3.29451e-17	45.5739	2.28849
B100265	Tryptophol	C00955	HMDB0003447	3.61731	6.96385e-20	12.2721	1.80154
B100268	Salicylic acid	C00805	HMDB0001895	1.75381	1.524e-19	3.37249	1.26212
B100272	4-Methylcatechol	C06730	HMDB0000873	-1.64972	3.69689e-06	0.318703	1.00697
B100290	Ornithine	C00077	HMDB0000214	-1.77472	1.49696e-08	0.292252	1.1315
B100296	L-Histidine	C00135	HMDB0000177	-2.3201	2.33341e-05	0.200254	1.11097
B100307	Biotin	C00120	HMDB0000030	1.86971	1.35566e-08	3.65458	1.30119
B100311	Cholic acid	C00695	HMDB0000619	-1.56717	4.81396e-06	0.33747	1.25262
B100338	L-Lysine	C00047	HMDB0000182	-3.62834	8.02424e-07	0.0808651	1.51556
B100369	N-Acetyl-L-aspartic acid	C01042	HMDB0000812	-2.5694	4.03718e-16	0.168475	1.50731
B100400	Palmitoylcarnitine	C02990	HMDB0000222	2.40071	3.48037e-12	5.28064	1.49157
B200011	4-Hydroxyphenylpyruvic acid	C01179	HMDB0000707	1.65817	3.29348e-08	3.15616	1.13416
B200041	1-Methylxanthine	C16358	HMDB0010738	-1.73625	2.95511e-07	0.30015	1.10636
B200076	(+/-)-Tryptophan	C00806	HMDB0030396	-2.77065	9.27977e-06	0.146538	1.22119
B200105	Alanine betaine		HMDB0240479	-4.01009	1.32554e-09	0.0620645	1.73509
B200124	Isoallolithocholic acid		HMDB0000713	-1.5848	0.000615857	0.333372	1.06902
B200126	Lithocholic acid	C03990	HMDB0000761	-1.98963	0.000426447	0.251804	1.13358
B200137	Norcholic acid		HMDB0255727	-0.985475	3.73139e-05	0.505059	1.06265
B200138	Dehydrocholic acid			1.51504	6.75635e-07	2.85806	1.05885
B200144	3a,6b,7b-Trihydroxy-5b-cholanoic acid	C17726	HMDB0000415	-2.81116	1.02243e-05	0.14248	1.19543
B200174	Pelargonic acid	C01601	HMDB0000847	1.7926	5.19994e-11	3.46439	1.25058
B300013	2,3-Dihydroxy-2-methylbutanoic acid		HMDB0029576	-3.54066	1.43292e-07	0.0859319	1.46355
B300016	Hydrocinnamic acid	C05629	HMDB0000764	2.32518	5.27398e-12	5.01129	1.40692
B300029	Glycylleucine	C02155	HMDB0000759	-2.22018	8.2601e-05	0.214614	1.02281
B300038	N-Acetylmethionine sulfoxide		HMDB0240343	-5.77899	3.92629e-19	0.0182116	2.34449
B300043	1-methyl-beta-carboline-3-carboxylic acid			5.53275	8.95886e-14	46.2939	2.32731
B300048	Pentadecanoic acid	C16537	HMDB0000826	1.22994	2.00867e-09	2.34557	1.01303
B300049	1,11-Undecanedicarboxylic acid		HMDB0002327	2.68454	2.0178e-12	6.42877	1.60603
B300050	2-Hydroxymyristic acid	C13790	HMDB0002261	-2.19083	4.39817e-07	0.219025	1.17189
B300055	Pyrraline		HMDB0033143	-1.91618	3.03291e-07	0.264955	1.3051
B300058	Lysylleucine		HMDB0028955	-2.32382	1.87173e-06	0.199738	1.24698
B300060	Threonylphenylalanine		HMDB0029068	1.84384	0.000283165	3.58965	1.15075
B300061	3-carboxy-4-methyl-5-pentyl-2-furanpropanoic acid		HMDB0061643	2.36429	3.27472e-08	5.14898	1.4269
B300085	5,8,11-Eicosatrienoic acid		HMDB0010378	-2.20047	7.39109e-07	0.217566	1.15554
B300097	N-Palmitoyltaurine		HMDB0240594	-3.86491	5.17083e-08	0.0686351	1.57822
B300117	Glycyrrhetinic acid	C02283	HMDB0011628	4.63968	2.71962e-06	24.9277	1.67271
B300121	PG(18:0/0:0)			1.26255	2.48798e-05	2.3992	1.00197
B300127	Stercobilinogen	C05789	HMDB0004157	3.95354	1.42372e-09	15.493	1.65923
B300159	Alanylleucine		HMDB0028691	-3.32836	5.59734e-08	0.0995553	1.48025
B300163	Xanoic acid			-2.23646	1.19082e-05	0.212206	1.13603
B300174	Sphingosine	C00319	HMDB0000252	-2.58885	7.57146e-07	0.166218	1.23801
B300175	Nicotianamine	C05324		-2.5416	2.41377e-08	0.171752	1.34274
B300191	alpha-Tocotrienol	C14153	HMDB0006327	1.5029	5.5156e-08	2.83411	1.08699
B300208	4-Methylphenol	C01468	HMDB0001858	1.55808	8.145e-15	2.94462	1.18153
B300215	2-Hydroxycaproic acid		HMDB0001624	-2.84623	0.000441089	0.139059	1.02755
B300236	(+/-)9-HpODE		HMDB0242602	-1.98363	6.87987e-06	0.252853	1.02462
B300251	DL-Stachydrine	C10172	HMDB0004827	1.58648	3.86978e-09	3.00315	1.18234
B300260	Hexanoylcarnitine		HMDB0000756	3.39619	1.05285e-09	10.5282	1.89712
B300264	Oleoyl ethanolamide	C20792	HMDB0002088	-1.51452	1.56719e-06	0.350013	1.01306
B300303	10Z-Nonadecenoic acid	C00750	HMDB0013622	-4.98196	1.87937e-14	0.0316431	2.04347
B300307	Dihomo-alpha-linolenic acid	C16522	HMDB0060039	-2.12337	6.33146e-07	0.229511	1.13686
B300310	Phenylalanylphenylalanine		HMDB0013302	-2.93058	2.46798e-06	0.131162	1.29938
B300317	Adrenic acid	C16527	HMDB0002226	-2.42534	2.85776e-05	0.186165	1.04844
B300341	Chenodeoxycholic acid 3-sulfate		HMDB0002586	-4.00521	3.61501e-06	0.0622746	1.57824
B300377	Leucylleucine	C11332	HMDB0028933	-2.35509	4.59055e-05	0.195455	1.07747
B300404	Linoleoyl ethanolamide		HMDB0012252	-2.79999	1.06185e-09	0.143588	1.42117
B300416	MG(0:0/20:4(5Z,8Z,11Z,14Z)/0:0)	C13856	HMDB0004666	1.39297	4.87652e-06	2.62618	1.14666
B300418	Succinyladenosine		HMDB0000912	1.54432	2.51063e-06	2.91667	1.07857
B300423	LysoPC(14:0/0:0)		HMDB0010379	-4.10247	1.1249e-05	0.0582148	1.37069
B300424	LysoPC(P-16:0/0:0)		HMDB0010407	-2.82632	2.11844e-10	0.140992	1.44513
B300427	LysoPC(16:0/0:0)	C04230	HMDB0010382	-2.49611	2.69791e-08	0.177254	1.29192
B300431	LysoPC(O-18:0/0:0)	C04317	HMDB0011149	-2.93459	4.01227e-05	0.130797	1.14094
B300519	2,3-Dimethylsuccinic acid		HMDB0245405	1.85445	7.76671e-10	3.61615	1.28473
B300560	phenylacetylserine		HMDB0341373	-2.14462	5.6922e-06	0.226155	1.11818
B300580	2-Methoxyacetaminophen sulfate		HMDB0062550	-4.15343	4.47616e-07	0.0561944	1.57666
B300586	Genistein	C06563	HMDB0003217	-3.10564	3.46426e-09	0.116174	1.485
B300656	Cyclo(L-prolyl-L-valyl)		HMDB0240493	-3.17834	2.8439e-16	0.110465	1.68001
B300664	Valylleucine		HMDB0029131	-2.46765	6.87455e-07	0.180786	1.2304
B300668	cyclo(pro-arg)			3.38727	8.06552e-07	10.4633	1.41462
B300685	N-Acetyltryptamine	C00977	HMDB0255077	5.33903	5.30644e-14	40.4769	2.33877
B300699	Ritalinic acid	C02774	HMDB0042008	1.77818	2.24961e-05	3.42993	1.41253
B300705	12-hydroxystearic acid	C05660	HMDB0061706	-3.7101	4.94776e-14	0.0764098	1.76774
B300710	6-Methyladenine	C08434	HMDB0002099	1.61653	4.33199e-06	3.06636	1.16351
B300790	Methylimidazoleacetic acid	C05828	HMDB0002820	-1.37769	3.14374e-06	0.384834	1.08903
B300820	Symmetric dimethylarginine		HMDB0003334	-2.70917	2.39075e-12	0.152918	1.5182
B300824	Leucyl-Glycine		HMDB0028929	-2.31101	1.80376e-05	0.201519	1.1109
B300858	Gamma-Caprolactone		HMDB0003843	-3.4196	2.42825e-13	0.0934537	1.69784
0.678_243.13366	NP-020439			1.27233	9.45591e-07	2.41551	1.19499
0.729_202.15460	KKK			2.3213	4.08617e-10	4.99783	1.32129
0.736_153.10236	3-hydroxyquinuclidine-3-carbonitrile hydrochloride			1.39738	2.60812e-08	2.63423	1.10309
0.747_198.08488	ethyl 3-oxo-3-(1H-pyrazol-5-ylamino)propanoate			-4.39519	3.32974e-09	0.0475243	1.82471
0.769_223.14413	4-(pentyloxy)benzene-1-carbohydrazide			2.10107	2.00622e-08	4.29029	1.41273
0.785_314.12302	(3-nitrophenyl)(4-pyrimidin-2-ylpiperazino)methanone			-3.21983	3.18817e-09	0.107333	1.57222
1.043_279.13388	N-{4-[(2R,3R)-3-(Hydroxymethyl)-4-methyl-5-oxo-2-morpholinyl]phenyl}acetamide			-2.32388	2.20552e-07	0.199729	1.34143
1.09_363.13973	(2S,3R,4S,5S,6R)-2-[4-hydroxy-2-(3-methylbut-2-en-1-yl)phenoxy]-6-(hydroxymethyl)oxane-3,4,5-triol			3.1603	8.49258e-10	8.94017	1.99747
1.123_255.09761	NP-002854			-2.33876	1.57045e-08	0.19768	1.3261
1.159_144.10216	NP-021733			1.65377	2.50907e-08	3.14655	1.20581
1.232_178.08657	1-(3,4-dimethoxyphenyl)ethan-1-one oxime			-3.39408	4.81203e-05	0.0951219	1.29185
1.373_305.06946	4-((5-(4-Nitrophenyl)oxazol-2-yl)amino)benzonitrile			-6.71555	1.00652e-08	0.0095152	2.15669
1.381_212.12841	Metaproterenol			1.92074	3.74804e-06	3.78618	1.18426
1.396_344.13387	(2E)-3-(2-{[(2S,3R,4S,5S,6R)-3,4,5-trihydroxy-6-(hydroxymethyl)oxan-2-yl]oxy}phenyl)prop-2-enoic acid			-5.61752	7.42762e-11	0.0203685	2.11236
1.692_268.09287	4-oxo-4-(5,6,7,8-tetrahydronaphthalen-1-ylamino)but-2-enoic acid			-2.4369	5.95657e-09	0.18468	1.36567
10.044_267.23255	trans-10-Heptadecenoic acid			1.28522	2.90273e-05	2.43719	1.2037
2.179_381.19156	2-[(2S,3R,4S,5R)-3,4-Dihydroxy-5-{[(isopropylcarbamoyl)amino]methyl}tetrahydro-2-furanyl]-N-[2-(dimethylamino)ethyl]acetamide			5.67096	9.01981e-18	50.9481	2.22674
2.348_225.08720	NP-011223			-2.60567	4.28552e-05	0.164291	1.13814
2.462_436.18393	(1S,2S,3S,4R,5R)-2-[(1,3-Benzodioxol-5-ylmethyl)amino]-4-{methyl[2-(2-pyridinyl)ethyl]amino}-6,8-dioxabicyclo[3.2.1]octan-3-ol			-2.72633	1.29664e-14	0.151109	1.56949
2.572_305.11341	(3aR,4aS,5R,6S,8S,9aR)-5,6-dihydroxy-4a,8-dimethyl-3-methylidene-dodecahydroazuleno[6,5-b]furan-2-one			-3.24774	0.000675161	0.105277	1.10261
2.732_196.09732	3-(4-hydroxy-3-methoxyphenyl)propanoic acid			1.52304	6.10741e-11	2.87397	1.17912
2.771_226.10759	3-isopropoxy-4-morpholinocyclobut-3-ene-1,2-dione			1.68561	1.44688e-08	3.21677	1.23199
2.79_206.11795	2-piperidinobenzoic acid			-4.87694	1.11258e-05	0.0340327	1.58432
2.8_331.13226	2-{[(4,5-dimethoxy-2-nitrophenethyl)imino]methyl}phenol			3.92134	1.17512e-12	15.151	2.01004
2.832_289.13945	4,8-dihydroxy-6,6,8-trimethyl-1H,3H,4H,4aH,5H,6H,7H,7aH,8H,9H-azuleno[5,6-c]furan-1-one			2.78032	7.45426e-13	6.87003	1.6456
2.849_228.08689	NP-016101			2.02432	1.95224e-08	4.068	1.41922
2.859_266.12486	N6-Me-dA			1.47532	2.35451e-09	2.78045	1.04889
2.918_226.11877	N1-(5-methylisoxazol-3-yl)-2-morpholinoacetamide			3.53342	1.51604e-11	11.5789	1.86796
2.943_301.16531	NP-001134			-4.7632	2.01032e-12	0.0368243	2.18368
2.952_190.10776	2-Aminooctanedioic acid			1.24384	3.13174e-05	2.36828	1.05568
2.98_315.18162	(2R,3R,4S,5S,6R)-2-{[(2E,6R)-6-hydroxy-2,6-dimethylocta-2,7-dien-1-yl]oxy}-6-(hydroxymethyl)oxane-3,4,5-triol			4.87768	1.64294e-16	29.3986	2.1573
2.988_315.19139	4-hydroxy-6-[2-(2-methyl-1,2,4a,5,6,7,8,8a-octahydronaphthalen-1-yl)ethyl]oxan-2-one			4.02986	7.51251e-12	16.3346	2.06581
2.993_225.07608	(2-Acetyl-3-hydroxy-5-methoxyphenyl)acetic acid			-4.70979	5.14738e-14	0.0382132	1.9724
3.033_448.20555	RNH			-2.0824	6.31325e-06	0.236122	1.09744
3.085_283.16527	2-(3-{[3-(Tetrahydro-2H-pyran-4-ylamino)-3-oxetanyl]methyl}-1,2-oxazol-5-yl)ethanol			2.95634	1.11064e-09	7.76152	1.72263
3.093_311.16019	Estriol			1.85061	9.84132e-09	3.60652	1.32797
3.115_300.16660	GNK			6.78064	1.84146e-32	109.945	2.52855
3.115_359.07721	NP-004020			-1.21896	7.6857e-14	0.429591	1.04778
3.117_325.02431	N-(2-hydroxy-1,3-dioxo-2,3-dihydro-1H-inden-2-yl)-2-methyl-1,3-thiazole-4-carboxamide			2.50525	2.42963e-11	5.67747	1.62243
3.146_346.16480	2-{7-oxo-2H,3H,7H-furo[3,2-g]chromen-2-yl}propan-2-yl 3-methylbut-2-enoate			4.78151	1.13391e-10	27.5029	2.38934
3.151_341.17074	1,3,7-trimethyl-8-[2-(1-methyl-2-phenylethylidene)hydrazino]-3,7-dihydro-1H-purine-2,6-dione			3.42841	1.28446e-10	10.766	1.88602
3.245_359.26519	VLK			-4.86133	9.94743e-10	0.0344027	1.8728
3.285_309.18090	N-(2,5-diethoxy-4-morpholinophenyl)acetamide			5.887	8.51987e-16	59.1786	2.42267
3.287_355.18631	1-{[1-(3,5-dimethoxyphenyl)-1-methylethoxy]carbonyl}pyrrolidine-2-carboxylic acid			2.7724	6.15709e-12	6.83243	1.60546
3.307_282.13364	4-[(3,4-dimethoxyphenethyl)amino]-4-oxobutanoic acid			3.24396	2.13416e-10	9.4739	1.83619
3.352_270.11259	1-oxo-2,3-dihydro-1H-inden-4-yl benzoate			-4.42605	3.89876e-14	0.0465187	1.94991
3.36_276.12308	NP-020215			-2.6601	1.3233e-07	0.158209	1.33244
3.368_439.21101	3-[(1R,9S)-11-(1-Acetyl-4-piperidinyl)-6-oxo-7,11-diazatricyclo[7.3.1.02,7]trideca-2,4-dien-5-yl]benzonitrile			6.84678	0.00644858	115.103	1.08654
3.401_346.11470	1-[1,1'-biphenyl]-4-yl-2-(2-methyl-4-nitro-1H-imidazol-1-yl)-1-ethanol			-2.79516	2.04147e-18	0.144069	1.58158
3.407_341.18169	DPK			3.12506	1.44902e-11	8.72442	1.79379
3.424_271.14435	Furanyl norfentanyl			-4.81673	9.14666e-07	0.0354831	1.67571
3.444_341.20695	(2Z)-5-(1,2,4a,5-tetramethyl-7-oxo-1,2,3,4,4a,7,8,8a-octahydronaphthalen-1-yl)-3-methylpent-2-enoic acid			3.86071	6.05348e-13	14.5275	1.97718
3.465_319.15135	NP-022469			-3.57894	3.8395e-12	0.083682	1.72101
3.47_242.08472	3-hydroxy-4-(3-toluidino)tetrahydro-1H-1lambda~6~-thiophene-1,1-dione			4.05314	1.47026e-12	16.6003	2.05964
3.487_188.10740	2-[(Dimethylamino)methylidene]indan-1-one			1.61415	2.27697e-05	3.06131	1.13408
3.49_271.16534	N-[1-(4-methoxy-2-oxo-2H-pyran-6-yl)-2-methylbutyl]acetamide			2.11015	1.33361e-07	4.31736	1.45576
3.505_407.11190	5-[(Benzoyloxy)methyl]-4,5,6-trihydroxy-2-cyclohexen-1-yl benzoate			3.59935	1.80459e-11	12.1203	1.67562
3.529_328.09605	5-(tert-butyl)-N-[4-(trifluoromethyl)phenyl]thiophene-2-carboxamide			5.71406	7.98631e-33	52.4931	2.32375
3.536_355.19741	methyl 18-hydroxy-3,13-diazapentacyclo[11.8.0.0脗?,脗a芒聛掳.0芒聛麓,芒聛a.0脗a芒聛碌,脗?芒聛掳]henicosa-2(10),4,6,8-tetraene-19-carboxylate			4.79243	3.37627e-12	27.7118	2.40666
3.543_286.10740	3,4-dihydroxy-4-(4-methoxyphenyl)-1,2,3,4-tetrahydroquinolin-2-one			-3.21912	4.6115e-05	0.107386	1.18806
3.548_319.16512	N-{4-[(2R,3R)-3-(Hydroxymethyl)-4-isopropyl-5-oxo-2-morpholinyl]phenyl}-2-methoxyacetamide			3.73723	3.87567e-10	13.3358	2.15328
3.559_433.11355	4H-1-Benzopyran-4-one, 6-beta-D-glucopyranosyl-2,3-dihydro-5,7-dihydroxy-2-(4-hydroxyphenyl)-, (S)-			-2.91134	7.03005e-15	0.132923	1.57446
3.565_327.11850	(1S,8S,9S,10S,13R)-6,9,10-trimethyl-2-oxo-4,14-dioxatetracyclo[7.5.0.0脗a,脗a脗l.0脗l,芒聛路]tetradeca-3(7),5-dien-8-yl acetate			1.6431	1.60245e-06	3.12336	1.10141
3.589_270.11251	4-[N-(p-Methoxy-benzylidene)amino]-phenyl acetate			-4.11149	9.67497e-05	0.0578521	1.34456
3.6_207.07672	4-Hydroxy-2-(2-hydroxyethyl)-1,2-dihydrophthalazin-1-one			2.57777	3.37405e-07	5.97014	1.86459
3.622_194.08158	N1-(2,3-dihydro-1,4-benzodioxin-6-yl)acetamide			1.29492	5.73157e-07	2.45363	1.0162
3.627_261.12342	3-[(4-hydroxyphenyl)methyl]-octahydropyrrolo[1,2-a]pyrazine-1,4-dione			1.92212	9.06336e-09	3.78979	1.30431
3.659_205.13377	2,7,7-trimethyl-5,6,7,8-tetrahydroquinolin-5-one oxime			1.55264	1.30057e-05	2.93354	1.11104
3.67_321.18076	N-{4-[(2R,3R)-3-(Hydroxymethyl)-4-methyl-5-oxo-2-morpholinyl]phenyl}-2,2-dimethylpropanamide			1.64758	2.79243e-06	3.13308	1.22672
3.674_373.23322	5-[5-(methoxycarbonyl)-5,8a-dimethyl-2-methylidene-decahydronaphthalen-1-yl]-3-methylpentanoic acid			-4.11221	3.21903e-06	0.0578233	1.50316
3.689_306.09056	2-[(1-benzothiophen-3-ylmethyl)amino]-1-phenylethan-1-ol			4.51837	5.20272e-23	22.9174	2.04372
3.707_264.10915	N1-[2-(2-pyridyl)ethyl]-2-aminobenzamide			2.40428	2.99968e-08	5.29371	1.46802
3.709_265.10468	NP-020400			-3.6799	5.18954e-05	0.0780262	1.2235
3.714_339.15499	4-{3-[(4-hydroxy-3-methoxyphenyl)methyl]-2-methylbutyl}benzene-1,2-diol			1.64571	2.84975e-11	3.12902	1.17933
3.718_232.09700	5-(benzyloxy)-2-(hydroxymethyl)-1,4-dihydropyridin-4-one			-3.75266	5.40681e-07	0.0741884	1.5533
3.718_258.16019	5?amino?3,3?dimethyl?6?[(1E)?2?(4?methylphenyl)diazen?1?yl]cyclohexa?1,5?dien?1?ol			1.80247	1.26659e-06	3.48818	1.54864
3.724_355.18629	9-hydroxy-7-(2-hydroxypropan-2-yl)-1,4a-dimethyl-1,2,3,4,4a,9,10,10a-octahydrophenanthrene-1-carboxylic acid			2.28035	3.75341e-08	4.85797	1.51302
3.739_266.13872	(5S,6S)-5-hydroxy-4-methoxy-6-(2-phenylethyl)-5,6-dihydro-2H-pyran-2-one			2.29958	1.15957e-09	4.92314	1.45599
3.75_311.16012	2-[(2S,3R,4S,5R)-5-(Aminomethyl)-3,4-dihydroxytetrahydro-2-furanyl]-N-(4-methoxybenzyl)acetamide			3.2254	3.96625e-10	9.3528	1.93956
3.773_335.16007	(4aR,7aR)-6-(1,3-Benzodioxol-5-ylmethyl)-4-(2-methoxyethyl)hexahydropyrrolo[3,4-b][1,4]oxazin-3(2H)-one			2.2515	9.43193e-09	4.76178	1.4714
3.778_223.10792	1-(2-methoxy-4-nitrophenyl)pyrrolidine			2.0249	8.45409e-08	4.06963	1.40466
3.798_254.11760	4-[2-(2-methylphenyl)-2-oxoethyl]benzamide			-2.6885	1.61237e-07	0.155124	1.35229
3.802_265.15469	2-(2-amino-3-methylbutanamido)-3-phenylpropanoic acid			-1.90063	2.18607e-05	0.267826	1.01608
3.803_276.06152	N'2-(2-hydroxybenzylidene)-5-nitrofuran-2-carbohydrazide			3.3254	7.19359e-10	10.0241	1.85333
3.855_305.17068	NP-016386			-2.35705	3.74627e-05	0.195189	1.09869
3.861_208.06070	5-(2-Nitroprop-1-enyl)-1,3-benzodioxole			-3.50901	1.51801e-17	0.0878379	1.78138
3.876_325.17578	NP-001596			2.92568	2.14664e-09	7.59833	2.08789
3.879_267.17038	Celestolide			6.41501	8.96862e-17	85.3319	2.50216
3.93_229.09817	2,6-Dimethyl-5-(4-methylphenoxy)pyrimidin-4-ol			2.30036	9.36171e-09	4.92581	1.26282
3.939_413.25069	5-[2-(3,4-dihydroxy-2,5-dimethoxyoxolan-3-yl)ethyl]-5,6,8a-trimethyl-octahydro-2H-spiro[naphthalene-1,2'-oxirane]-2,3-diol			-4.64834	1.743e-10	0.039876	1.89322
3.942_247.14419	N-allyl-2-(2-methyl-1-benzofuran-3-yl)acetamide			2.91874	6.83763e-14	7.56186	1.66131
3.944_272.12818	NP-002897			3.90904	5.57031e-10	15.0223	2.03887
3.958_218.08143	4-hydroxy-5,8-dimethylquinoline-3-carboxylic acid			-2.14509	0.000281197	0.22608	1.07318
3.987_291.17028	ethyl 1-(4-acetyl-2-aminophenyl)piperidine-4-carboxylate			2.27235	3.55308e-08	4.83109	1.46719
3.997_308.18560	NP-000295			3.49982	1.98979e-10	11.3123	1.91056
4.001_363.15500	2-hydroxy-4-methoxy-3-(3-methylbut-2-en-1-yl)-6-(2-phenylethyl)benzoic acid			3.57642	3.63533e-16	11.9292	1.77059
4.037_215.08172	NP-020292			-1.65825	1.77792e-10	0.316824	1.2043
4.058_317.13845	NP-013229			-2.8235	1.01137e-06	0.141268	1.30066
4.06_297.10806	NP-015090			1.17736	2.02938e-06	2.26163	1.42618
4.068_245.12857	N-benzyl-N,3,5-trimethylisoxazole-4-carboxamide			-2.19311	2.11161e-05	0.21868	1.07259
4.083_349.13936	2-[1-(2H-1,3-benzodioxol-5-yl)propan-2-yl]-6-methoxy-4-(prop-2-en-1-yl)phenol			4.0292	3.84346e-09	16.3271	1.72435
4.125_204.13860	alpha-Pyrrolidinopropiophenone			3.5237	2.31521e-12	11.5011	1.76447
4.138_303.08630	2-hydroxy-6-[2-hydroxy-6-(hydroxymethyl)-4-methoxyphenoxy]-4-methylbenzoic acid			2.55101	8.01316e-18	5.86046	1.54855
4.155_331.12178	1-benzyl-3-(2-methylphenyl)-3,7-dihydro-1H-purine-2,6-dione			2.80925	9.15167e-08	7.00919	1.58225
4.171_277.07473	ethyl 3-[(4-chlorophenethyl)amino]-2-cyanoacrylate			-4.83246	4.72746e-15	0.0350983	2.1309
4.184_351.21740	6,15-diketo-13,14-dihydro Prostaglandin F1?			6.44841	1.29141e-22	87.33	2.45245
4.198_249.15984	N1-(2,6-dimethylphenyl)-2-morpholinoacetamide			1.40003	5.85019e-06	2.63908	1.13465
4.216_359.13814	8-methoxy-1-(3-methoxyphenyl)-3-oxo-3,4,5,6-tetrahydrobenzo[f]quinoline-2-carbonitrile			2.55968	3.78902e-11	5.89577	1.53622
4.218_266.13874	N-(2,6-Dimethylphenyl)-N-(methoxyacetyl) alanine			-3.42409	2.05897e-13	0.0931634	1.71182
4.22_203.11827	10b-methyl-1,5,6,10b-tetrahydroimidazo[2,1-a]isoquinolin-2(3H)-one			-2.26166	8.35354e-08	0.208532	1.24588
4.227_258.11256	NP-006878			-6.07112	2.83778e-07	0.0148735	1.91352
4.239_398.19208	(1R,9S)-11-[(Dimethylamino)acetyl]-5-[4-(methylsulfanyl)phenyl]-7,11-diazatricyclo[7.3.1.02,7]trideca-2,4-dien-6-one			-2.07623	6.02828e-10	0.237133	1.27287
4.245_229.09736	N1-[4-(1,3-Oxazol-5-yl)phenyl]cyclopropane-1-carboxamide			1.82926	7.44401e-17	3.55355	1.26107
4.252_244.06392	3-{[(4-amino-1,3,5-triazin-2-yl)thio]methyl}benzonitrile			4.22492	1.70623e-12	18.6994	1.81779
4.282_322.20122	3-hydroxy-N-(1-hydroxy-4-methylpentan-2-yl)-5-oxo-6-phenylhexanamide			3.84052	1.41465e-10	14.3255	2.09706
4.299_248.12824	3,4-Methylenedioxy-alpha-pyrrolidinopropiophenone			0.936721	0.000945299	1.91417	1.03754
4.305_351.21652	Prostaglandin K2			5.53799	5.42095e-15	46.4623	2.35652
4.321_295.09244	NP-013039			3.64567	4.77646e-12	12.5157	1.87156
4.322_303.08630	8-oxatetracyclo[8.7.0.0脗?,芒聛路.0脗a脗?,脗a芒聛路]heptadeca-2(7),3,5,12,14,16-hexaene-5,6,10,14,15-pentol			2.36161	2.386e-14	5.13945	1.48531
4.358_279.12336	(1'S,2'S)-3',11'-dihydroxy-1',2',5'-trimethyl-8'-oxaspiro[oxirane-2,12'-tricyclo[7.2.1.0脗?,芒聛路]dodecan]-5'-en-4'-one			1.81074	3.38827e-11	3.50821	1.28898
4.367_347.18524	NP-005870			5.8622	1.4964e-18	58.1698	2.28754
4.425_255.09511	N2-(2,4-dimethylphenyl)-1,3-benzothiazol-2-amine			4.06327	8.57708e-19	16.7174	1.94147
4.434_247.10778	2-(3,5-dimethyl-1H-pyrazol-4-yl)-5-methoxybenzoic acid			-3.22176	2.69461e-08	0.10719	1.53235
4.45_243.07646	6-(2-furyl)-2-hydroxy-4-(methylthio)nicotinonitrile			4.6426	3.26576e-26	24.9782	2.08691
4.452_464.26445	N-{(4R,7S,8aS)-4-[3-(Benzylamino)-3-oxopropyl]-1-oxooctahydropyrrolo[1,2-a]pyrazin-7-yl}-4-(dimethylamino)benzamide			3.97643	3.55491e-12	15.7408	2.0948
4.471_234.09868	2-[(2-Methylimidazo[1,2-a]pyridin-3-yl)carbonyl]hydrazine-1-carboxamide			2.02534	6.37547e-09	4.07088	1.30462
4.521_294.21756	2-Methoxy-N-{[(2R,4S,5S)-5-(4-morpholinylmethyl)-1-azabicyclo[2.2.2]oct-2-yl]methyl}acetamide			-3.2409	1.07834e-08	0.105777	1.58316
4.555_181.07602	4-Nitrosodiphenylamine			5.77889	3.26073e-22	54.906	2.35452
4.563_407.26526	FLK			-2.87505	3.29325e-07	0.136309	1.38921
4.567_309.13740	N-[(1R,9S)-6-Oxo-7,11-diazatricyclo[7.3.1.02,7]trideca-2,4-dien-5-yl]isonicotinamide			-2.59291	1.60789e-05	0.165751	1.43127
4.573_202.08657	4-(allyloxy)-1,2-dihydroquinolin-2-one			-1.92164	0.00152134	0.263955	1.01203
4.594_275.13895	AB-CHMINACA metabolite M5A			-1.66872	4.02708e-05	0.314531	1.01421
4.609_287.11387	3-(3-methoxypropyl)-4,10-dihydro-3H-[1,2,4]triazino[6,1-b]quinazoline-4,10-dione			-2.07616	5.16295e-10	0.237144	1.26214
4.614_455.14845	5-{(2R,3S)-6-Hydroxy-2-(4-hydroxyphenyl)-4-[(E)-2-(4-hydroxyphenyl)vinyl]-2,3-dihydro-1-benzofuran-3-yl}-1,3-benzenediol			5.4137	3.61972e-19	42.6272	2.19732
4.628_331.19034	NP-020713			10.0928	3.47597e-32	1092.05	3.10239
4.636_269.13845	3-(3,4-dimethylphenyl)-3,4-dihydro-1,2,3-benzotriazin-4-one			1.92257	3.72325e-10	3.79097	1.21189
4.637_305.10611	N1-(3,5-dichlorophenyl)-2-[(4-hydroxy-6-propylpyrimidin-2-yl)thio]acetamide			-2.29156	7.94044e-05	0.204254	1.0558
4.658_241.08610	NP-021868			-1.6306	6.85064e-05	0.322955	1.02169
4.682_255.12341	NP-020515			1.60717	2.13297e-06	3.04653	1.12234
4.718_314.19617	NP-022507			2.81991	1.51778e-15	7.06119	1.60101
4.778_207.10184	NP-013210			1.0879	5.53469e-05	2.12565	1.05571
4.778_257.13843	NP-021074			1.15901	4.21849e-05	2.23304	1.10468
4.779_539.15766	1,4:3,6-Dianhydro-2-{[(2-cyanophenyl)sulfonyl]amino}-2-deoxy-5-O-[(4-phenoxyphenyl)carbamoyl]-D-glucitol			1.12189	6.07299e-05	2.17631	1.52583
4.828_311.18283	NP-020273			-3.66734	3.63828e-09	0.0787083	1.60155
4.866_438.23927	N-{[(2R,4S,5R)-5-{[(2R)-2-(Methoxymethyl)-1-pyrrolidinyl]methyl}-1-azabicyclo[2.2.2]oct-2-yl]methyl}-4-(trifluoromethyl)benzamide			-3.81887	1.1026e-07	0.070861	1.54048
4.889_295.15399	(3E,5S,8R,11E,13S,16R)-5,13-dihydroxy-8,16-dimethyl-1,9-dioxacyclohexadeca-3,11-diene-2,10-dione			1.8963	9.65983e-07	3.72257	1.38081
4.949_227.09172	NP-007866			2.25768	1.70934e-13	4.78222	1.44139
4.965_257.08090	(3R)-8-hydroxy-3-(4-hydroxyphenyl)-3,4-dihydro-1H-2-benzopyran-1-one			2.49079	4.4297e-09	5.62086	1.53529
5.024_269.17479	NP-018817			-2.10396	4.52446e-07	0.232619	1.18096
5.029_339.19129	NP-014175			2.89393	1.18063e-09	7.43295	1.74266
5.032_265.14350	4,9-dihydroxy-6-methyl-3,10-dimethylidene-2H,3H,3aH,4H,7H,8H,9H,10H,11H,11aH-cyclodeca[b]furan-2-one			1.36422	4.96436e-08	2.57436	1.08178
5.06_215.21204	dodecanohydrazide			3.21863	0.00034664	9.30903	1.06358
5.086_352.21175	(3S,3aR,4S,4aR,7aR,8R,9aR)-3,4a,8-trimethyl-2,5-dioxo-2H,3H,3aH,4H,4aH,5H,7aH,8H,9H,9aH-azuleno[6,5-b]furan-4-yl 2-methylpropanoate			5.25728	5.77685e-15	38.2472	2.31863
5.089_235.10787	4-ethoxy-6,7-dimethoxyquinazoline			-3.48663	4.43321e-14	0.0892114	1.80264
5.089_283.15400	NP-004987			3.45708	1.01685e-15	10.9821	1.78788
5.091_367.21237	Thromboxane B3			1.93515	1.81787e-07	3.82417	1.25398
5.229_311.14967	tetranor-PGFM			2.70618	2.02372e-16	6.52591	1.59601
5.229_386.18619	VMH			6.74909	1.04202e-21	107.567	2.48881
5.257_227.16437	5-(6-hydroxy-6-methyloctyl)-2,5-dihydrofuran-2-one			1.46654	6.73898e-07	2.76358	1.19531
5.3_299.18528	13,14-dihydro-15-keto-tetranor Prostaglandin E2			-2.73848	1.85341e-10	0.149842	1.45289
5.301_281.17472	NP-016516			-5.90922	1.97134e-11	0.0166398	2.76918
5.37_269.08146	(3R)-8-hydroxy-3-(4-methoxyphenyl)-3,4-dihydro-1H-2-benzopyran-1-one			-5.43386	1.44829e-06	0.0231338	1.69443
5.376_290.18631	(4aR,7aS)-6-Isobutyl-4-(4-pyridinylmethyl)hexahydropyrrolo[3,4-b][1,4]oxazin-3(2H)-one			-3.53547	8.36427e-05	0.086242	1.30213
5.38_349.20175	Resolvin E1			6.17471	1.2657e-17	72.2394	2.44161
5.385_318.13776	N-[4-(diethylamino)phenyl]-N'-phenylurea			-4.48842	1.34281e-08	0.0445505	1.74636
5.41_249.11284	2-(2-carboxy-2-methylpropyl)-4,6-dimethylbenzoic acid			1.84998	0.000202945	3.60494	1.26066
5.422_311.14860	tetranor-PGDM			2.01472	1.13023e-09	4.04101	1.30977
5.427_273.12337	N-(2-morpholinophenyl)-2-furamide			2.13253	4.25949e-10	4.38485	1.42896
5.432_393.22302	N1,N1-dipropyl-4-(3-azabicyclo[3.2.2]non-3-ylcarbonyl)benzene-1-sulfonamide			-3.17237	2.79383e-09	0.110923	1.65728
5.48_295.09632	5,6-dimethoxy-2-(2-methoxyphenyl)-4H-chromen-4-one			3.40329	2.71828e-16	10.5802	1.77042
5.481_353.09945	(1S,3aS,4R,6aR)-1,4-bis(2H-1,3-benzodioxol-5-yl)-hexahydrofuro[3,4-c]furan-3a-ol			3.45822	6.8533e-18	10.9908	1.78578
5.481_385.03684	2,2-difluoro-N-[2-methyl-6-(trifluoromethyl)pyridin-3-yl]-2-(phenylthio)acetamide			3.18652	5.9598e-16	9.10414	1.71443
5.517_267.15967	3-[4-methyl-1-(2-methylpropanoyl)-3-oxocyclohexyl]butanoic acid			1.26875	1.84707e-09	2.40952	1.04053
5.532_291.17038	2-(1-{2-Oxo-2-[(2-pyridinylmethyl)amino]ethyl}cyclohexyl)acetic acid			-2.23868	2.06816e-06	0.21188	1.15836
5.539_271.06015	3,5,7-trihydroxy-2-phenyl-4H-chromen-4-one			-3.6669	9.43692e-08	0.0787322	1.53202
5.544_241.14357	NP-012017			3.06588	3.38337e-11	8.37381	1.7324
5.561_247.13296	NP-022451			2.19029	1.86787e-10	4.56396	1.40518
5.589_187.08686	2-(1H-indol-3-yl)-4,5-dihydro-1,3-oxazole			-2.42203	2.48784e-08	0.186593	1.35912
5.589_311.14886	Tetranor-PGDM			1.54368	2.44609e-07	2.91538	1.13335
5.59_281.12842	4-(2-hydroxyphenyl)-8,9-dimethyl-2,3-dihydro-1H-1,5-benzodiazepin-2-one			-6.33853	3.70125e-07	0.012357	1.95777
5.62_385.21014	N-{4-[(2R,3R)-3-(Hydroxymethyl)-4-isobutyl-5-oxo-2-morpholinyl]phenyl}-3-methylbutanamide			-8.61866	5.62182e-07	0.00254405	2.20727
5.656_309.20597	2,3-dinor-8-iso Prostaglandin F2?			-1.79951	4.49353e-11	0.287272	1.21544
5.659_385.22008	PPG Acrylate n5			-2.22005	1.63368e-07	0.214633	1.28591
5.662_239.12795	1-(3-ethyl-2,4-dihydroxy-6-methoxyphenyl)butan-1-one			2.9772	1.24443e-11	7.87459	1.7129
5.682_293.13833	11,13-Dihydroxy-4-methyl-4,5,6,7,8,9-hexahydro-2H-3-benzoxacyclododecine-2,10(1H)-dione			1.73275	7.98249e-09	3.3236	1.23209
5.686_420.24929	3-ethyl 5-methyl 2-{4-[(2-hydroxycyclohexyl)amino]piperidino}-6-methylpyridine-3,5-dicarboxylate			4.37053	3.0985e-15	20.6853	1.96756
5.752_430.12842	O1-(2-thienylcarbonyl)-2-({5-[4-(tert-butyl)phenyl]-4-methyl-4H-1,2,4-triazol-3-yl}thio)ethanehydroximamide			3.69617	1.6631e-12	12.9616	1.90183
5.778_262.10751	Ethyl 1-methyl-4,5-dioxo-2-phenylpyrrolidine-3-carboxylate			-3.48327	5.84831e-07	0.089419	1.61781
5.799_302.23248	NP-008563			2.43081	9.00735e-06	5.39195	1.16686
5.825_443.17400	NP-021299			-3.47313	4.718e-12	0.0900501	1.75687
5.852_277.10699	8-(1,2-dihydroxy-3-methylbut-3-en-1-yl)-7-methoxy-2H-chromen-2-one			1.35569	2.06073e-10	2.55919	1.07149
5.86_269.17533	NP-002676			2.53016	2.947e-14	5.77636	1.53805
5.878_469.22598	N-{[(2R,3S,4R,5S)-3,4-Dihydroxy-5-{2-oxo-2-[4-(2-pyridinyl)-1-piperazinyl]ethyl}tetrahydro-2-furanyl]methyl}-2-ethylbutanamide			-2.82599	2.73868e-07	0.141023	1.35182
5.886_265.10765	NP-005519			1.2686	4.89282e-11	2.40928	1.03808
5.893_273.13330	NP-016495			1.3919	2.73886e-08	2.62423	1.08297
5.904_249.14862	(3aR,5aR,9bR)-3a-hydroxy-5a,9-dimethyl-3-methylidene-2H,3H,3aH,4H,5H,5aH,6H,7H,8H,9bH-naphtho[1,2-b]furan-2-one			1.53975	2.54871e-08	2.90744	1.15519
5.907_487.23631	N-[(1S,3aS,5S,7aR)-7a-{3-[(2-Furylmethyl)amino]-3-oxopropyl}-5-hydroxy-3,3,5-trimethyloctahydro-1H-inden-1-yl]benzamide			-5.83257	1.1918e-16	0.0175477	2.39862
5.95_415.21561	N1-(3-amino-4-chlorophenyl)-2-[2,4-di(tert-pentyl)phenoxy]acetamide			-2.96761	3.85962e-05	0.127838	1.36226
5.968_229.13373	[4-(tert-butyl)phenyl](1H-imidazol-2-yl)methanone			-3.63615	5.07018e-07	0.0804287	1.51175
6.017_227.12797	(2R,3R,4S,5S,6R)-2-[(3Z)-hex-3-en-1-yloxy]-6-(hydroxymethyl)oxane-3,4,5-triol			1.43133	3.14546e-07	2.69694	1.12944
6.14_302.19616	NP-016437			1.81731	7.28041e-15	3.52423	1.25743
6.175_235.16942	Ageratriol			1.569	2.84374e-10	2.96698	1.15424
6.181_288.21692	3a-hydroxy-3-(hydroxymethyl)-1,1,3,5-tetramethyl-octahydro-1H-indene-4-carboxylic acid			2.21137	1.96677e-08	4.63114	1.43393
6.196_378.19528	4-methyl-5-{2-[4-(2-pyridinyl)piperazino]acetyl}-1,3,4,5-tetrahydro-2H-1,5-benzodiazepin-2-one			-3.13894	0.000144477	0.113524	1.16962
6.197_368.24306	5-(4-carboxy-3-methylbutyl)-5,6,8a-trimethyl-3-oxo-3,4,4a,5,6,7,8,8a-octahydronaphthalene-1-carboxylic acid			3.69738	1.34684e-12	12.9725	1.8927
6.211_323.18605	NP-005397			3.92318	3.38789e-12	15.1703	1.86518
6.212_479.26431	NP-022389			4.11744	0.00129132	17.3569	1.05898
6.218_298.16483	4,6-dihydroxy-5a-methyl-3-methylidene-2-oxo-dodecahydronaphtho[1,2-b]furan-9-carbaldehyde			1.77355	8.29806e-11	3.41893	1.27811
6.237_249.11224	NP-000629			1.84608	2.15082e-07	3.59521	1.27226
6.243_265.14349	NP-008515			2.16603	5.9273e-14	4.48788	1.41823
6.314_269.17479	NP-011878			2.60263	8.76624e-11	6.07392	1.57144
6.34_265.14349	(1aR,1bR,2R,3R,7aR)-3-hydroxy-7a-(3-hydroxyprop-1-en-2-yl)-1b,2-dimethyl-1aH,1bH,2H,3H,4H,5H,7H,7aH-naphtho[1,2-b]oxiren-7-one			1.64728	4.8742e-09	3.13243	1.21203
6.346_217.14367	(2R)-2-[(2R,5S)-5-[(2S)-2-hydroxybutyl]oxolan-2-yl]propanoic acid			1.17572	7.04523e-06	2.25906	1.0183
6.449_349.20175	19(R)-Hydroxy prostaglandin A2			3.37158	3.17342e-16	10.3501	1.78955
6.467_351.21738	19(R)-Hydroxy prostaglandin F2alpha			2.02498	4.1458e-11	4.06986	1.36261
6.468_229.04376	4-(2,3-dihydrobenzo[b]furan-5-yl)pyrimidine-2-thiol			-2.09967	3.60692e-07	0.233311	1.17639
6.506_363.18016	5',9'-dimethyl-4'-oxo-3',12'-dioxaspiro[oxirane-2,14'-tetracyclo[7.5.0.0脗?,芒聛露.0脗a脗a,脗a脗l]tetradecane]-10'-yl (2Z)-2-methylbut-2-enoate			3.18245	1.03422e-11	9.07845	1.58657
6.516_237.18504	NP-020014			1.83592	1.15603e-10	3.56998	1.28383
6.527_267.12274	(2R,3S,4S,5R,6R)-2-(hydroxymethyl)-6-(2-phenylethoxy)oxane-3,4,5-triol			1.76614	7.06251e-06	3.40142	1.18158
6.536_265.14347	NP-008274			2.16723	5.45368e-13	4.49159	1.34444
6.583_247.13297	NP-009815			3.43167	3.92469e-18	10.7904	1.74414
6.59_279.07644	methyl N-(2-fluorophenyl)-(2-fluoroanilino)methanimidothioate hydroiodide			4.01067	7.2415e-16	16.1188	1.95353
6.687_431.21046	5-hydroxy-2,2,6,6-tetramethyl-4-{2-methyl-1-[2,4,6-trihydroxy-3-(2-methylpropanoyl)phenyl]propyl}cyclohex-4-ene-1,3-dione			-3.16318	8.63138e-15	0.111632	1.6774
6.721_261.11218	NP-004844			7.18521	2.05231e-19	145.534	2.52956
6.8_373.16874	NP-004714			-1.71894	1.98497e-07	0.303772	1.0784
6.814_289.09184	NP-013538			-3.06544	7.33656e-08	0.119457	1.46387
6.818_251.16427	NP-022394			1.22313	2.48407e-08	2.33453	1.00549
6.832_347.18610	11-keto Testosterone (CRM)			3.44899	3.17878e-11	10.9207	1.81234
6.916_309.13324	methyl 2-[(4aR,5R,6R,7S,8aR)-8a-ethenyl-5,7-dihydroxy-4-methylidene-3-oxo-octahydro-1H-2-benzopyran-6-yl]prop-2-enoate			-3.14271	1.9345e-05	0.113227	1.25631
6.974_169.04981	5,6-dimethyl-4-oxo-4H-pyran-2-carboxylic acid			-2.24772	1.58765e-06	0.210557	1.18225
6.975_421.13403	3-{[(2S,3R,4S,5S,6R)-6-({[(2R,3R,4R)-3,4-dihydroxy-4-(hydroxymethyl)oxolan-2-yl]oxy}methyl)-3,4,5-trihydroxyoxan-2-yl]oxy}-2-methyl-4H-pyran-4-one			-4.05534	5.09956e-07	0.0601479	1.5968
6.982_471.24159	Nalpha-{[(2R)-1-(4-Piperidinylcarbonyl)-2-piperazinyl]carbonyl}-D-tryptophanamide			2.52187	1.28254e-11	5.74324	1.46843
7.047_235.16941	NP-000294			1.51047	1.83414e-14	2.84904	1.1652
7.05_371.24362	13,14-dihydro-19(R)-hydroxy Prostaglandin E1			1.21744	2.26909e-05	2.32533	1.05692
7.059_333.20599	NP-002113			1.82862	1.68231e-14	3.55198	1.27596
7.059_368.24305	NP-007138			1.37357	3.31201e-14	2.5911	1.09702
7.128_311.14888	NP-017667			-2.53102	0.000214294	0.173016	1.01088
7.137_169.04981	methyl 4-methyl-2-oxo-2H-pyran-6-carboxylate			-1.915	3.94906e-07	0.265173	1.12135
7.137_331.10232	NP-014517			-2.77158	3.19984e-08	0.146444	1.3904
7.181_291.15976	NP-018545			1.88226	7.68643e-05	3.68653	1.16864
7.246_503.33747	NP-003964			2.63433	0.00122789	6.20889	1.01267
7.309_307.19110	2,3-Dinor prostaglandin E1			1.99108	7.89693e-09	3.97535	1.35014
7.405_348.27439	(12Z)-9,10,11-trihydroxyoctadec-12-enoic acid			-3.08276	9.81475e-07	0.118031	1.32941
7.528_353.10202	2',4',11-trioxaspiro[tricyclo[4.4.1.0脗a,芒聛露]undecane-2,3'-tricyclo[7.3.1.0芒聛碌,脗a脗l]tridecane]-1'(12'),3,5',7',8,9'(13'),10'-heptaene-5,7,10-triol			2.7754	0.000220447	6.84667	1.03576
7.597_453.28521	beta-Muricholic acid			-2.60848	0.000107774	0.163972	1.04644
7.612_222.09157	2-Styryl-1,3-benzoxazole			2.56127	1.81166e-05	5.90227	1.33108
7.628_390.28496	Thromboxane B1			1.35309	2.22001e-06	2.55458	1.08949
7.713_353.23065	NP-013663			-1.41092	3.99491e-08	0.376071	1.05421
7.722_369.13348	NP-016466			6.40622	0.00241695	84.8131	1.28628
7.747_483.24149	N-{1-[2-({2-[(7-methyl-2,3-dihydro-1H-inden-4-yl)oxy]-3-pyridinyl}amino)-2-oxoethyl]-4-piperidinyl}benzamide			-3.44139	5.20661e-20	0.0920528	1.7731
7.785_374.29000	8-Isoprostaglandin F1beta			-2.73393	5.88223e-05	0.150316	1.07828
7.848_534.34342	17-hydroxy-1,14,18-trimethyl-8-(prop-1-en-2-yl)pentacyclo[11.8.0.0脗?,脗a芒聛掳.0芒聛碌,芒聛a.0脗a芒聛麓,脗a芒聛a]henicosane-2,5,18-tricarboxylic acid			2.14212	1.00501e-11	4.41412	1.31598
7.992_205.07098	N1-(1H-1,2,4-triazol-3-yl)-2-hydroxybenzamide			-3.58444	5.14349e-07	0.0833634	1.50914
8.089_353.10195	NP-019983			4.83265	0.00185471	28.4952	1.19929
8.113_497.25701	{(2R,4S,5R)-5-[6-(4-Fluorophenyl)-2-methyl-4-pyrimidinyl]-1-azabicyclo[2.2.2]oct-2-yl}methyl cyclohexylcarbamate			-3.69516	5.46225e-19	0.077205	1.84344
8.144_511.27255	2-[(1S,4S,5S)-4-({[(3-Fluorophenyl)carbamoyl]amino}methyl)-5-isopropyl-2-methyl-2-cyclohexen-1-yl]-N-methyl-N-(3-pyridinylmethyl)acetamide			-3.95939	6.78425e-14	0.0642842	1.79809
8.18_381.26431	1a,1b-Dihomo prostaglandin F2alpha			-4.34105	0.000529498	0.0493415	1.16146
8.215_425.23233	4-[(3R)-7-hydroxy-5-methoxy-6-(3-methylbut-2-en-1-yl)-3,4-dihydro-2H-1-benzopyran-3-yl]-2-(3-methylbut-2-en-1-yl)benzene-1,3-diol			6.1969	0.00223305	73.359	1.26722
8.216_335.22240	8-iso-13,14-dihydro-15-keto Prostaglandin F2?			-3.21825	0.000185114	0.107451	1.10717
8.319_917.48682	FRH			-1.97465	6.8015e-05	0.254432	1.00386
8.357_354.26378	15-epi Prostaglandin A1			-3.23219	0.000862999	0.106417	1.01265
8.432_315.25292	NP-008993			-1.58177	2.07101e-10	0.334072	1.12879
8.437_317.24746	17-(1-Hydroxyethyl)-10,13-dimethyl-2,3,6,7,8,9,10,11,12,13,14,15,16,17-tetradecahydro-1H-cyclopenta[a]phenanthren-3-one			2.22107	1.02392e-06	4.66239	1.3013
8.507_335.22242	15(S)-HpETE			-3.62294	0.000433186	0.0811685	1.15076
8.543_365.10273	NP-015468			7.09614	0.00187691	136.821	1.36981
8.553_350.26887	(+/-)17(18)-EpETE methyl ester			-5.39261	1.02031e-12	0.0238047	2.08978
8.761_344.27945	1,2-dihydroxyheptadec-16-yn-4-yl acetate			-3.57508	1.41293e-05	0.0839062	1.2754
8.761_349.23485	(4aS,5R,6S,8aS)-5-[(3E)-5-methoxy-3-methyl-5-oxopent-3-en-1-yl]-5,6,8a-trimethyl-3,4,4a,5,6,7,8,8a-octahydronaphthalene-1-carboxylic acid			-3.7559	5.45004e-05	0.0740221	1.24581
8.971_363.25368	1a,1b-Dihomo prostaglandin E1			-4.21849	2.04178e-05	0.0537164	1.40532
8.987_321.24131	(+/-)11(12)-DiHET			-2.92503	1.00146e-09	0.131667	1.48681
8.987_394.18036	NP-016141			-2.85647	1.11741e-09	0.138075	1.47808
9.059_311.21927	(11E,15Z)-9,10,13-trihydroxyoctadeca-11,15-dienoic acid			3.03105	6.99521e-20	8.17403	1.67609
9.194_455.24094	NP-022407			2.11942	1.49406e-10	4.34518	1.32936
9.235_323.09647	3-(3-anilino-4-phenyl-5-thioxo-4,5-dihydro-1H-1,2,4-triazol-1-yl)propanoic acid			-2.67334	5.95335e-06	0.156763	1.23341
9.244_317.21105	15-deoxy-?12,14-Prostaglandin D2			3.35256	5.16996e-14	10.2146	1.67611
9.342_394.29516	NP-009800			1.91087	1.01389e-07	3.76035	1.35783
9.346_351.22954	NP-016087			-4.1454	6.34294e-07	0.056508	1.53666
9.354_323.25878	Labdanolic acid			-2.58914	3.15572e-05	0.166185	1.06506
9.364_375.25055	NP-002336			1.59266	3.12865e-07	3.01606	1.21739
9.405_351.22072	15-keto Prostaglandin F2?			9.58386	7.4487e-28	767.414	3.01621
9.407_357.21752	Ethyl {(1S,4S,5S)-4-[(isonicotinoylamino)methyl]-5-isopropyl-2-methyl-2-cyclohexen-1-yl}acetate			-3.32089	4.84233e-15	0.100072	1.78436
9.431_306.27907	NP-016582			-3.83392	6.23342e-07	0.0701255	1.4222
9.445_321.24319	15-OxoEDE			-2.02517	4.43941e-10	0.245677	1.21931
9.53_317.21188	(+/-)18-HEPE			6.87141	1.73751e-19	117.085	2.5892
9.589_322.27163	Sphingosine (d18:1)			-1.70054	1.42616e-07	0.307671	1.09088
9.626_427.28235	NP-017176			0.81392	0.000131191	1.75798	1.35086
9.714_491.27706	1-({(1S,4S,6S)-6-Isopropyl-3-methyl-4-[2-(4-methyl-1-piperazinyl)-2-oxoethyl]-2-cyclohexen-1-yl}methyl)-3-(3-methoxyphenyl)urea			1.29225	9.98116e-06	2.4491	1.0909
9.724_394.33130	(2E,4E,14E)-13-Hydroperoxy-N-(2-methylpropyl)icosa-2,4,14-trienamide			-2.68599	7.89755e-06	0.155395	1.20924
9.784_346.29500	1,4-dihydroxyheptadec-16-en-2-yl acetate			2.20257	1.26789e-08	4.603	1.43704
9.813_348.28957	NP-021685			-1.80732	2.47065e-06	0.285721	1.03473
9.887_581.29987	(3beta,9xi)-3-(beta-D-Glucopyranosyloxy)-14-hydroxycard-20(22)-enolide			-2.3461	5.24987e-08	0.196677	1.27174
B100072	3,4-Dihydroxyphenylglycol	C05576	HMDB0000318	-1.42184	2.44942e-09	0.373237	1.05033
B100201	Palmitoleic acid	C08362	HMDB0003229	-2.77827	3.51428e-09	0.145767	1.41368
B100276	12-Hydroxydodecanoic acid	C08317	HMDB0002059	-2.71395	2.19683e-14	0.152412	1.50949
B100315	N-methyl-L-glutamic Acid	C01046	HMDB0062660	1.71526	2.25033e-13	3.28356	1.22125
B300037	N6-Carboxymethyllysine		HMDB0240347	-2.40409	9.16696e-06	0.188929	1.15829
B300094	alpha-CEHC sulfate		HMDB0341286	-3.84637	6.1811e-08	0.0695229	1.56621
B300169	Heptadecasphingosine (d17:1)			2.64487	4.89426e-20	6.25439	1.54919
B300292	Vorinostat		HMDB0015568	-2.76491	1.47847e-05	0.147122	1.20223
B300403	Allopregnanolone	C13712	HMDB0001449	-4.84855	1.72958e-07	0.034709	1.71536
B300569	2-Hydroxyphenylacetic acid sulfate		HMDB0240441	-2.17886	3.45934e-05	0.22085	1.02342
B300575	delta-CEHC		HMDB0242106	1.61305	0.000195718	3.05898	1.16492
B300621	pregnenetriol sulfate			-2.75192	1.29636e-08	0.148454	1.60376
B300761	Progesterone	C00410	HMDB0001830	4.27886	3.57693e-16	19.4117	1.94044
B300863	Milnacipran		HMDB0015602	4.1786	1.91522e-20	18.1085	1.93612
Reference-1017	Cyanazine	C14299		-2.23488	1.04882e-05	0.212438	1.35282
Reference-1053	Imazamox	C18598		0.792867	0.000232532	1.73251	1.1401
Reference-1065	Mefenamic acid	C02168	HMDB0014922	-3.95864	6.00347e-05	0.0643178	1.31193
Reference-1088	Morphine	C01516	HMDB0014440	3.09381	3.48105e-09	8.5375	1.97492
Reference-1099	4-Acetamidoantipyrine			1.82835	3.17725e-05	3.5513	1.30096
Reference-1102	N,N-Dimethyldecylamine N-oxide			-3.5065	0.000538825	0.0879909	1.14166
Reference-1111	Propazine	C14312		1.06909	0.00111832	2.09811	1.07397
Reference-1192	Sinapinic acid	C00482	HMDB0032616	-2.14155	8.80084e-05	0.226636	1.15769
Reference-1241	L-Aspartic acid beta-benzyl ester			3.14806	2.1493e-13	8.86463	1.6559
Reference-1285	Gibberellin A4	C11864		3.43167	9.334e-14	10.7903	1.81554
Reference-1337	Methylsuccinic acid		HMDB0001844	-1.63425	6.48719e-08	0.322137	1.07143
Reference-1357	Prostaglandin E2	C00584	HMDB0001220	3.86889	4.33381e-12	14.61	1.93506
Reference-1374	N-Acetylsphingosine			-3.43019	9.47107e-05	0.0927702	1.18311
Reference-1407	Edaravone	C13008	HMDB0006240	-1.58323	6.40607e-05	0.333735	1.0376
Reference-141	2-Hydroxyphenylacetic acid	C05852	HMDB0000669	1.34076	1.0361e-15	2.53285	1.09351
Reference-149	2-Hydroxy-4-methylthiobutanoic acid			-2.37073	0.000147149	0.193348	1.04726
Reference-157	2,4-Quinolinediol	C16716		-2.00888	3.40378e-12	0.248466	1.29886
Reference-1576	Benzyladenine	C11263	HMDB0039238	1.60123	7.77796e-07	3.03401	1.13772
Reference-1594	Decoquinate	D03667		2.46229	5.04898e-09	5.5109	1.72284
Reference-1646	Lincomycin	C06812	HMDB0015564	12.1107	0.00265873	4422.63	1.53572
Reference-1724	1-Tetradecylamine			2.16508	2.27493e-07	4.48492	1.24982
Reference-1789	N-Ethylglycine	C11735	HMDB0041945	-1.35905	6.78356e-10	0.389839	1.02557
Reference-192	3-Aminosalicylic acid		HMDB0001972	1.41143	1.1957e-13	2.66	1.09596
Reference-1923	Betaxolol	C06849	HMDB0014341	1.73667	1.53183e-09	3.33265	1.23118
Reference-20	Apigenin	C01477	HMDB0002124	-2.09249	5.27042e-06	0.234475	1.08273
Reference-2168	Testosterone decanoate	C14607	HMDB0002998	-2.7019	5.9408e-15	0.153691	1.56156
Reference-2182	Harmine	C06538	HMDB0030311	2.74657	1.84625e-09	6.71121	1.62116
Reference-2266	Levodropropizine	D08119		1.40646	6.38113e-07	2.65087	1.12294
Reference-2316	Pyrithiobac			-3.22178	7.53917e-09	0.107188	1.88122
Reference-233	4-Guanidinobutyric acid	C01035	HMDB0003464	2.37378	4.03557e-07	5.18298	1.30776
Reference-2358	Prilocaine	C07531	HMDB0014888	2.26015	3.36198e-05	4.79042	1.37169
Reference-2463	Oxycodone	C08018	HMDB0014640	7.39626	2.47517e-16	168.46	2.69843
Reference-2551	16-Hydroxyhexadecanoic acid	C18218	HMDB0006294	-4.04247	1.77782e-06	0.0606868	1.43017
Reference-2576	2,6-Dimethyl-gamma-pyrone			2.80194	2.47814e-09	6.97378	1.74425
Reference-2577	2,6-Diphenylphenol			6.48059	7.24543e-22	89.3	2.42851
Reference-2715	Ethyl oleate	D04090		-4.24514	5.61206e-09	0.0527333	1.6798
Reference-2720	Diethyleneglycol diacetate			-4.56102	1.57412e-14	0.0423639	1.98905
Reference-2728	Cyclohexanecarboxylic acid	C09822	HMDB0031342	1.36167	3.33466e-07	2.56983	1.0979
Reference-278	7alpha-Hydroxytestosterone			1.6931	1.05375e-06	3.23351	1.11045
Reference-2830	Dodecyltrimethylammonium	C20389		4.50021	1.7369e-14	22.6306	1.99238
Reference-2844	1,5-Naphthalenediamine	C19463		-2.75783	6.72492e-06	0.147847	1.23561
Reference-286	17alpha-Hydroxypregnenolone	C05138	HMDB0000363	4.08873	1.45961e-16	17.0149	1.91225
Reference-2863	Benzidine	C16444	HMDB0041835	4.29027	3.95281e-20	19.5659	2.02252
Reference-2866	Butylparaben	D01420	HMDB0032575	3.42913	1.05566e-10	10.7714	1.85222
Reference-2892	Norgestrel			6.97117	4.85386e-13	125.467	2.39174
Reference-2933	6-Methylquinoline		HMDB0033115	4.07275	1.74646e-22	16.8275	1.93106
Reference-2981	Soyasaponin I	C08983	HMDB0034649	-2.11406	4.5142e-14	0.230997	1.34939
Reference-3020	MK-812			-2.81219	1.97134e-11	0.142379	1.51091
Reference-3032	N-(2,4-Dimethylphenyl)formamide			3.39943	3.39998e-11	10.5519	1.92746
Reference-3088	1,8-Diazabicyclo [5.4.0]undec-7-ene			-2.01211	2.81877e-06	0.24791	1.08885
Reference-3108	Carbaryl	C07491		-2.10549	0.000907897	0.232372	1.12498
Reference-3134	Azobenzene			3.80261	1.32458e-22	13.9541	1.87525
Reference-3148	N-Vinyl-2-pyrrolidone	C19548		1.65242	5.83279e-09	3.1436	1.22933
Reference-3247	1,2,3,4-Tetramethyl-1,3-cyclopentadiene			2.30379	3.85433e-12	4.93754	1.47299
Reference-3256	6,7-Dimethoxy-1-phenyl-3,4-dihydroisoquinoline			-3.25486	0.00259545	0.104759	1.07191
Reference-3328	3-tert-Butyladipic acid			1.83592	6.94705e-17	3.56998	1.29316
Reference-3360	5,6,7,8-Tetrahydro-2-naphthol	C14309		1.48752	2.60296e-06	2.80407	1.06898
Reference-3472	N-Desmethyltramadol		HMDB0061007	3.68465	6.56824e-11	12.8585	2.01528
Reference-390	Deoxycorticosterone 21-glucoside			-3.36705	7.00269e-06	0.0969211	1.29797
Reference-401	N-Acetyldopamine		HMDB0041943	1.52304	6.10741e-11	2.87397	1.17912
Reference-42	Atrazine	C06551	HMDB0041830	-2.77238	1.53829e-07	0.146363	1.37462
Reference-428	Glycitein	C14536	HMDB0005781	-3.17606	7.1278e-07	0.110639	1.35648
Reference-4416	Methanandamide			-5.8619	0.000128579	0.0171946	1.31045
Reference-4432	N-Oleoyl dopamine	C12272		-3.56489	1.98376e-05	0.0845011	1.29837
Reference-4433	N-Arachidonoyl-L-serine			4.55765	1.80779e-15	23.5499	2.12887
Reference-449	Indole-3-acrylic acid			2.38158	6.08136e-10	5.21109	1.47824
Reference-453	Isohomovanillic acid		HMDB0000333	-1.48891	1.16122e-08	0.356281	1.05078
Reference-4597	Prostaglandin A1 ethyl ester			3.61624	2.54976e-06	12.263	1.42356
Reference-490	Methylhippuric acid		HMDB0000859	1.34873	1.28068e-11	2.54688	1.10388
Reference-4963	JWH 200 6-OH indole metabolite			3.29675	4.75351e-05	9.82699	1.3219
Reference-4984	Moxonidine	C07451	HMDB0041938	-1.80839	6.03757e-05	0.28551	1.33505
Reference-4985	Norfenefrine	D08286		-1.98636	1.09435e-05	0.252375	1.11516
Reference-513	N-Acetylornithine			-1.70916	1.90405e-09	0.305838	1.13648
Reference-5176	Imidocarb	D08069		1.64214	2.51747e-06	3.12129	1.18482
Reference-5355	ADB-FUBINACA			-2.04244	5.61518e-08	0.242753	1.20059
Reference-541	N-Phenylacetylglutamine	C04148	HMDB0006344	3.8024	3.39691e-09	13.952	1.73708
Reference-542	Phloretin	C00774	HMDB0003306	-3.86765	9.20735e-09	0.068505	1.653
Reference-552	Pregnenolone	C01953	HMDB0000253	3.56887	3.56203e-12	11.8669	1.67939
Reference-563	Prostaglandin B1	C00959	HMDB0002982	5.70799	2.03219e-13	52.2727	2.41326
Reference-607	2,6-Di-tert-butyl-1,4-benzoquinone		HMDB0013817	-3.14306	1.76395e-11	0.1132	1.58661
Reference-6090	2-(1-Adamantyl)imidazo[1,2-a]pyridine			2.69856	5.19e-06	6.49152	1.39234
Reference-6166	Zearalenone	C09981	HMDB0031752	2.88717	1.79887e-12	7.39817	1.62173
Reference-6172	Androsterone	C00523	HMDB0000031	-4.73433	0.00314396	0.0375686	1.05715
Reference-6193	16alpha-Hydroxydehydroepiandrosterone	C05139	HMDB0000352	-2.8894	8.86473e-09	0.13496	1.41578
Reference-6199	Catharanthine	C09107		3.4003	2.77611e-09	10.5583	1.72286
Reference-6219	(+)-ar-Turmerone			-2.11446	5.10683e-05	0.230932	1.05299
Reference-6228	N-(p-Coumaroyl) serotonin		HMDB0038340	-3.52669	5.81791e-06	0.0867681	1.44275
Reference-631	Stercobilin	C05793	HMDB0240259	6.23837	7.25582e-14	75.4982	2.58404
Reference-6554	(-)-Caryophyllene oxide	C16908	HMDB0036789	-1.51527	4.30664e-14	0.349831	1.14586
Reference-6558	2,4-Dimethylbenzaldehyde		HMDB0032142	3.57046	1.80917e-16	11.88	1.76623
Reference-6585	Butyl benzoate			1.13019	4.32028e-05	2.18887	1.07765
Reference-6589	Ethyl palmitoleate			-2.8642	1.69288e-11	0.137338	1.48141
Reference-6591	trans-delta2-11-Methyl-dodecenoic acid			-3.28905	1.13255e-15	0.102305	1.68871
Reference-6593	all-cis-4,7,10,13,16-Docosapentaenoic acid		HMDB0001976	-2.56687	1.76845e-06	0.168769	1.17889
Reference-6618	1-Linoleoyl glycerol			1.66235	1.08995e-07	3.16532	1.24122
Reference-6624	Eicosapentaenoic acid ethyl ester	C16184	HMDB0039530	-2.03716	2.87376e-07	0.243643	1.13589
Reference-6634	Ricinoleic acid methyl ester			-4.17417	8.67563e-09	0.0553925	1.67528
Reference-6648	Acetochlor OXA			-2.34439	2.39178e-12	0.19691	1.41854
Reference-6708	5-[(1,3-Dimethyl-1H-pyrazol-5-yl)amino]-5-oxopentanoic acid			-2.48902	0.000141521	0.178127	1.10932
Reference-6717	9-Nitrooleate			-1.57419	0.000315216	0.335832	1.0266
Reference-6752	tert-Butyl N-[1-(aminocarbonyl)-3-methylbutyl]carbamate			-2.57997	5.05656e-06	0.167245	1.20388
Reference-6771	(R)-3-Hydroxy myristic acid	C22001	HMDB0010731	-1.78581	1.13896e-06	0.290013	1.0458
Reference-6874	5(Z),8(Z),11(Z)-Eicosatrienoic acid methyl ester			-4.11824	7.38229e-05	0.0575818	1.23036
Reference-6877	Eicosapentaenoic acid methyl ester			-3.55595	2.75014e-11	0.0850264	1.75201
Reference-6910	Palmitelaidic acid methyl ester			-2.17016	2.70248e-05	0.222186	1.09433
Reference-6922	Docosapentaenoic acid methyl ester			2.75806	2.19816e-08	6.76488	1.36935
Reference-7165	1,4-Androstadiene-3,17-dione	C20144	HMDB0003422	7.78513	1.56828e-32	220.576	2.70528
Reference-7177	2-Hydroxyquinoline	C06415		1.3823	3.81337e-06	2.60684	1.05924
Reference-7202	4-Allyl-1,2-diphenyl-3,5-pyrazolidinedione			-3.68481	5.18162e-05	0.0777611	1.29068
Reference-727	Glutethimide	C07489	HMDB0015505	-3.07943	0.00028816	0.118304	1.12985
Reference-7295	Oxepanone			2.03112	2.52362e-08	4.08721	1.40524
Reference-7320	5-Fluoro AMB metabolite 2			4.30426	4.84285e-11	19.7566	2.41251
Reference-7364	Picrotin	C09528		5.51518	3.95281e-20	45.7335	2.31363
Reference-7388	2-(2'-Hydroxy-3,5'-di-tert-butylphenyl)-5-chlorobenzotriazole		HMDB0041339	-4.01048	3.19129e-12	0.0620476	1.92231
Reference-7404	Asiatic acid	C08617		2.54147	1.52171e-11	5.8218	1.4548
Reference-7416	(3aS,4aR,7aS,9bS)-3-Ethyl-2-oxo-3,3a,7a,9b-tetrahydro-2H,4aH-1,4,5-trioxadicyclopenta[a,hi]indene-7-carboxylic acid			2.45663	2.39933e-20	5.48932	1.50345
Reference-7449	(10Z)-6,10-Bis(hydroxymethyl)-3-methylene-2-oxo-2,3,3a,4,5,6,7,8,9,11a-decahydrocyclodeca[b]furan-4-yl methacrylate			3.70278	9.58282e-09	13.0211	2.05215
Reference-7522	Ambrosic acid			1.88501	7.08516e-11	3.69356	1.3092
Reference-7533	5-(4-Carboxy-3-methylbutyl)-1,4a-dimethyl-6-methylenedecahydro-1-naphthalenecarboxylic acid			1.58763	2.79087e-07	3.00555	1.03733
Reference-7540	5-[(2Z,8Z)-2,8-Pentadecadien-1-yl]-1,3-benzenediol			-2.56558	0.000642748	0.168921	1.00064
Reference-7561	N-[1-(4-Methoxy-2-oxo-2H-pyran-6-yl)-2-methylpropyl]acetamide			2.56097	5.17305e-12	5.90104	1.5328
Reference-7583	Medroxalol	D04888		3.49882	6.36015e-11	11.3045	2.03947
Reference-7600	4-Amino-2-hydroxy-5-{[1-hydroxy-1-(2-oxobicyclo[4.1.0]hept-3-en-1-yl)-2-propanyl]amino}-5-oxopentanoic acid			2.00799	5.63345e-08	4.02221	1.2797
Reference-7617	2-Hydroxy-4-(4-hydroxyphenyl)butanoic acid			1.97154	0.000365905	3.92186	1.06109
Reference-7621	1-(5,8-Dimethoxy-2,2-dimethyl-2H-chromen-6-yl)ethanone			1.35953	2.28476e-09	2.56601	1.08599
Reference-7672	4-O-Methylpinosylvic acid		HMDB0040868	-4.11492	3.6759e-11	0.0577148	1.87546
Reference-7737	4-[(6E)-3-Hydroxy-8,10-dimethyl-2-(methylamino)-6-dodecen-1-yl]phenol			-3.61074	0.00327961	0.0818578	1.07918
Reference-7744	(3aS,10aR,10bR)-6,10a-Dimethyl-3-methylene-3,3a,4,5,7,8,10a,10b-octahydrofuro[3',2':6,7]cyclohepta[1,2-b]pyran-2,9-dione			2.13215	9.42482e-08	4.38371	1.33464
Reference-7776	(1S,4R,4aS,8aS)-1,2-Bis(hydroxymethyl)-5,5,8a-trimethyl-1,4,4a,5,6,7,8,8a-octahydro-1,4-naphthalenediol			2.272	1.41582e-10	4.82993	1.45421
Reference-7781	2-[(1S)-1-Hydroxyethyl]-4(1H)-quinazolinone			2.12375	5.91505e-06	4.35825	2.02302
Reference-7826	Sorbicillin			1.79991	0.000100015	3.48198	1.17601
Reference-783	Lidocaine	C07073	HMDB0014426	4.94589	1.56975e-14	30.8221	2.15533
Reference-7834	(3beta,5xi,9xi)-3,23-Dihydroxy-1-oxoolean-12-en-28-oic acid			3.44262	4.7916e-17	10.8726	1.76166
Reference-7885	5-[(1S,2R,4aR)-5-(Hydroxymethyl)-1,2,4a-trimethyl-1,2,3,4,4a,7,8,8a-octahydro-1-naphthalenyl]-3-methylpentanoic acid			-2.55389	0.000158584	0.170295	1.04932
Reference-7911	2-Hydroxy-4,5',8a'-trimethyl-1'-oxo-4-vinyloctahydro-1'H-spiro[cyclopentane-1,2'-naphthalene]-5'-carboxylic acid			1.35278	2.26691e-08	2.55404	1.0935
Reference-7931	4-Methylumbelliferyl acetate	C03837	HMDB0032989	-1.55576	0.00220615	0.34015	1.00694
Reference-7942	2,4-Bis(3-methyl-2-buten-1-yl)-6a,11a-dihydro-6H-[1]benzofuro[3,2-c]chromene-3,9-diol			4.15579	0.00466563	17.8246	1.0555
Reference-7987	8-[(1E)-3-Hydroxy-1-buten-1-yl]-1,5-dimethyl-6-oxabicyclo[3.2.1]octane-3,8-diol			2.14941	6.16937e-07	4.43645	1.5033
Reference-7995	Avocadyne 1-acetate		HMDB0031048	-2.48493	1.88572e-06	0.178633	1.18981
Reference-8010	(6E)-10-Heptyl-5,8,9-trihydroxy-3,4,5,8,9,10-hexahydro-2H-oxecin-2-one			1.65667	3.25958e-07	3.15287	1.24991
Reference-8013	5,7,9b-Trihydroxy-6,6,9a-trimethyl-5,5a,6,7,8,9,9a,9b-octahydronaphtho[1,2-c]furan-1(3H)-one			2.27551	8.34538e-18	4.84168	1.45569
Reference-802	Methyl red	C19459		-2.09589	3.84632e-05	0.233923	1.24242
Reference-8152	(3beta,5xi,9xi)-3-{[2-O-(beta-D-Glucopyranosyl)-beta-D-glucopyranosyl]oxy}-23-hydroxyolean-12-en-28-oic acid			-2.38935	3.93725e-09	0.190868	1.39913
Reference-8307	2-Naphthylamine	C02227	HMDB0041802	4.39031	1.07747e-11	20.9708	2.05236
Reference-8369	Diproqualone			2.05776	9.46399e-11	4.16339	1.39235
Reference-8396	N-Benzyl-4-piperidone			-2.70425	7.15626e-06	0.153441	1.24188
Reference-8415	Eucalyptol	C09844	HMDB0004472	2.49295	1.04961e-10	5.62926	1.5383
Reference-8493	PB-22 N-pentanoic acid-3-carboxyindole metabolite			-3.26431	8.99518e-08	0.104074	1.49771
Reference-8599	4-Acetyl-1-cyclopropyl-2,5-dimethyl-1H-pyrrole-3-carboxylic acid			1.87474	2.48812e-09	3.66736	1.19689
Reference-8628	N-Cyclohexylidene-2-carbamylcyclohex-1-enylamine			2.2595	5.53409e-05	4.78825	1.1208
Reference-8798	Methyl (2R)-1-(cyclohexylcarbonyl)-4-(methoxyacetyl)-2-piperazinecarboxylate			3.23551	2.30433e-11	9.41857	1.76231
Reference-8801	(4S,6S)-N-(Cyclopropylmethyl)-6-isobutyl-1-[(1-methyl-1H-imidazol-2-yl)methyl]-3,4,5,6-tetrahydro-1H-azepino[5,4,3-cd]indole-4-carboxamide			3.98762	2.60157e-10	15.8633	2.25417
Reference-8868	N-[(1R,9S)-11-(1-Acetyl-4-piperidinyl)-6-oxo-7,11-diazatricyclo[7.3.1.02,7]trideca-2,4-dien-3-yl]-2-furamide			-3.2375	2.16779e-11	0.106026	1.60923
Reference-8918	N-{[(2R,4S,5R)-5-Vinyl-1-azabicyclo[2.2.2]oct-2-yl]methyl}-4-morpholinecarboxamide			-1.79136	4.0796e-10	0.2889	1.20197
Reference-9051	N-({(2R,4S,5R)-5-[1-Methyl-3-(2-naphthyl)-1H-pyrazol-5-yl]-1-azabicyclo[2.2.2]oct-2-yl}methyl)-2-phenoxyacetamide			-4.89829	3.28293e-17	0.0335325	2.07188
Reference-9082	N-{[(2R,4S,5S)-5-{[4-(2-Pyrimidinyl)-1-piperazinyl]methyl}-1-azabicyclo[2.2.2]oct-2-yl]methyl}benzamide			4.56136	2.19651e-13	23.6106	1.94925
Reference-9097	Methyl (2R,4S,6S,12bR)-2-[(2-hydroxyethyl)amino]-4-(3-methoxyphenyl)-1,2,3,4,6,7,12,12b-octahydroindolo[2,3-a]quinolizine-6-carboxylate			-4.39024	6.95467e-09	0.0476876	1.69138
Reference-9133	N-Benzyl-2-[(3R,4S)-3-{[5-(2-pyridinyl)-1,2-oxazol-3-yl]methyl}-4-piperidinyl]acetamide			-3.50197	1.0786e-08	0.0882677	1.57289
Reference-9148	N-{[(2R,4S,5S)-5-{[4-(2-Methoxyphenyl)-1-piperazinyl]methyl}-1-azabicyclo[2.2.2]oct-2-yl]methyl}-1,3-benzodioxole-5-carboxamide			3.70697	2.72571e-13	13.059	1.83835
Reference-923	Taurocholic acid	C05122	HMDB0000036	-2.72841	5.33949e-05	0.150893	1.13855
Reference-935	Valerophenone		HMDB0031208	-2.96905	2.32378e-12	0.12771	1.56404
Reference-992	2-[4-(3-Amino-2-hydroxypropoxy)phenyl]acetamide			3.05007	1.26959e-10	8.28254	1.79221
0.59_293.99215	4-Bromo-2-[(4-fluoroanilino)methyl]phenol			1.81593	6.8888e-08	3.52087	1.24767
0.607_296.04422	3-(3,4-dimethoxyphenethyl)-2-thioxo-1,3-thiazolan-4-one			4.87935	2.61824e-18	29.4328	2.16405
0.623_494.97437	5-chloro-N-[5-({[5-(3-methyl-4-nitrophenyl)-1,3,4-oxadiazol-2-yl]methyl}thio)-1,3,4-thiadiazol-2-yl]thiophene-2-carboxamide			-3.73323	0.000360383	0.0751944	1.19567
0.634_256.03090	8-methyl-7-oxo-5-(2-thienyl)-7,8-dihydro[1,2,4]triazolo[4,3-a]pyrimidine-6-carbonitrile			2.78372	3.5153e-10	6.88627	1.57338
0.635_214.02050	2-(4-chloro-2-methylphenyl)hydrazine-1-carbothioamide			1.395	0.000642724	2.62988	1.13289
0.636_200.00490	N-(2-chlorophenyl)hydrazine-1-carbothioamide			1.63987	5.45568e-05	3.11637	1.20955
0.637_175.00688	3-(2-hydroxyethyl)-1,2,3,4-tetrahydrothieno[3,2-d]pyrimidine-2,4-dione			3.47971	3.86981e-25	11.1557	1.79705
0.639_315.08057	N'2-(2-Thienylcarbonyl)-5-(1-hexynyl)-2-furancarbohydrazide			-4.65387	1.18498e-11	0.0397232	1.93586
0.666_291.12931	N1-Benzyl-4-(dimethylamino)-3,5-difluorobenzamide			-2.4697	1.11276e-06	0.180529	1.23177
0.677_310.06277	N1-phenyl-2-[3-(trifluoromethyl)phenyl]hydrazine-1-carbothioamide			-4.88012	1.2896e-06	0.0339576	1.67053
0.679_249.04523	5-nitrothiophene-3-carbaldehyde 3-(2-pyridyl)hydrazone			1.61516	5.39504e-05	3.06345	1.15043
0.679_286.05974	5-(1,3-dioxo-1,3-dihydro-2H-isoindol-2-yl)-1H-indole-3-carbonitrile			-4.40926	5.97262e-10	0.047063	1.8343
0.679_302.07556	N,6-diphenylthieno[2,3-d]pyrimidin-4-amine			-4.20925	3.62353e-05	0.0540615	1.34504
0.68_130.09754	morpholine-4-carboximidamide hydrobromide			-1.50622	7.52748e-08	0.352032	1.03181
0.682_405.11603	N1-[3-(Trifluoromethyl)phenyl]-2-[(5-methyl-4-phenyl-1,3-oxazol-2-yl)carbonyl]hydrazine-1-carboxamide			-3.64346	6.1657e-10	0.0800221	1.63693
0.695_338.15536	1-[(benzylideneamino)(phenyl)methyl]-2-naphthol			-3.01772	9.13201e-11	0.123474	1.56146
0.699_252.10760	methyl 3,3,3-trifluoro-2-hydroxy-2-[(2-phenoxyacetyl)amino]propanoate			-2.02774	9.29673e-07	0.245239	1.13399
0.7_369.08707	3-{2,5-dimethyl-1-[4-(trifluoromethyl)phenyl]-1H-pyrrol-3-yl}-2-(methylsulfonyl)acrylonitrile			3.9317	4.0276e-12	15.2602	1.79037
0.703_189.01598	N'-Hydroxy-2-(2-thienylthio)ethanimidamide			1.5715	7.18918e-07	2.97214	1.13977
0.704_328.10578	4-(5-Cyano-1H-1,2,3-triazol-4-yl)phenyl 3,5-dimethylisoxazole-4-carboxylate			-3.14178	1.95544e-07	0.1133	1.43979
0.705_240.08748	NP-021698			1.30265	1.4824e-10	2.46681	1.04569
0.714_296.13459	N-(1,1-dioxotetrahydro-1H-1lambda~6~-thiophen-3-yl)adamantane-1-carboxamide			-2.73278	3.63286e-09	0.150436	1.5286
0.72_214.05896	4-[5-(Trifluoromethyl)-1H-pyrazol-3-yl]pyridine			-2.28461	2.49106e-06	0.205241	1.18703
0.728_199.07137	4-Amino-2-pyrazin-2-ylpyrimidine-5-carbonitrile			4.86885	2.30779e-15	29.2194	2.17847
0.733_347.22885	SLK			-3.81474	1.56201e-07	0.0710638	1.58166
0.734_232.15402	2-(2-hydroxy-3-methylbutanamido)-4-methylpentanoic acid			2.56146	5.87435e-10	5.90305	1.64382
0.734_248.14880	4-methyl-5-oxo-2-pentyl-2,5-dihydrofuran-3-carboxylic acid			1.94152	1.21709e-12	3.84109	1.31206
0.735_374.23968	LNK			-4.23563	2.20462e-07	0.053082	1.61658
0.737_302.02689	5-(3,4-dichlorobenzyl)-4-propyl-4H-1,2,4-triazole-3-thiol			-2.07683	3.69671e-05	0.237035	1.01651
0.739_331.23377	ALK			-3.82259	4.3696e-07	0.0706781	1.55237
0.754_218.13867	2-(tert-Butyl)-7,8-dihydroimidazo[1,2-a]pyrazolo[1,5-c][1,3,5]triazine			1.43406	5.0502e-06	2.70206	1.10459
0.756_215.13988	3-{[(hexylamino)carbonyl]amino}propanoic acid			1.40632	1.5583e-05	2.6506	1.05527
0.756_216.15941	RKK			1.98188	2.45907e-14	3.95008	1.33149
0.764_210.11261	4-(4-hydroxy-3-methoxyphenyl)butan-2-one oxime			1.8134	7.82881e-07	3.5147	1.31261
0.764_304.10336	1-{2-[(2-hydroxyethyl)thio]ethyl}-2-methyl-5-phenyl-1H-pyrrole-3-carboxylicacid			-4.22711	0.00055396	0.0533966	1.17265
0.785_434.18844	FMH			-2.52038	2.0913e-11	0.174297	1.46086
0.788_403.17022	PQH			-2.56218	7.31734e-06	0.169319	1.2206
1.018_169.01756	N-(4-chlorophenyl)urea			-4.37861	3.84076e-16	0.0480736	1.97074
1.233_245.99348	2-({3-[(cyanomethyl)thio]-1,2,4-thiadiazol-5-yl}thio)acetonitrile			1.13215	4.83469e-05	2.19185	1.01579
1.244_159.11310	GLK			2.33902	2.31521e-12	5.05958	1.45331
1.318_282.10058	2-(amino{[(3,4-dimethylanilino)(methylthio)methylidene]amino}methylidene)-1-oxohydrazinium-1-olate			-1.50273	2.13166e-07	0.352886	1.04618
1.349_367.08134	3,4-di(benzyloxy)furan-2,5-dicarboxylic acid			-2.64598	1.8146e-10	0.159765	1.72133
1.367_342.11905	6-{[(1-benzothiophen-3-ylmethyl)amino]carbonyl}-3,4-dimethylcyclohex-3-ene-1-carboxylic acid			-5.71765	3.33435e-09	0.0190027	2.03736
1.568_236.11301	1-(4-fluorobenzyl)-2-methyl-4-nitro-1H-imidazole			2.39153	8.65894e-09	5.24714	1.52405
1.676_252.05376	ethyl 1-(4-chlorophenyl)-1H-1,2,3-triazole-4-carboxylate			-3.05456	4.78093e-05	0.120361	1.32465
1.758_230.11372	2-Pyridinecarbaldehyde N-(4-amino-6-methyl-1,3,5-triazin-2-yl)hydrazone			2.51554	8.65894e-09	5.7181	1.5952
1.819_442.09207	6-[(4-chlorobenzyl)sulfanyl]-N,1-diphenyl-1H-pyrazolo[3,4-d]pyrimidin-4-amine			-5.4256	3.47851e-11	0.0232666	2.02917
1.901_282.09720	ethyl 3-hydroxy-4,6-dimethoxy-2-oxoindoline-3-carboxylate			-3.29475	4.00733e-16	0.101901	1.71058
1.918_345.12917	(4-methylphenyl)(dioxo){[(1,2,3,4-tetrahydro-1-naphthalenylamino)carbonyl]amino}-lambda~6~-sulfane			3.64011	2.60563e-11	12.4676	2.13751
1.968_283.03898	4-{2-[2-(Methoxycarbonyl)-3-thienyl]hydrazino}-3-methyl-4-oxo-2-butenoic acid			-5.70386	5.49775e-05	0.0191852	1.67437
10.103_579.29138	NP-005406			1.41139	1.67682e-08	2.65993	1.08295
10.146_370.29595	Oleoyl Ethanolamide			-1.72003	2.47283e-07	0.303542	1.1082
2.02_187.10808	EPK			1.62632	1.05163e-09	3.08724	1.16394
2.147_276.14415	4-(3,4-dimethylphenyl)-1-thia-4-azaspiro[4.5]decan-3-one			-3.2246	1.50631e-07	0.106979	1.45964
2.313_379.20743	QLH			-2.16912	1.39459e-06	0.222347	1.42916
2.342_280.12920	Nicotinaldehyde N-(6,7-dihydro-5H-cyclopenta[d][1,2,4]triazolo[1,5-a]pyrimidin-8-yl)hydrazone			-4.36638	0.000287753	0.048483	1.31608
2.364_232.04533	4-(2-thienylmethyl)-1lambda~6~,4-thiazinane-1,1-dione			-5.14765	1.68098e-13	0.02821	2.09549
2.492_194.10404	N1-methyl-2-[imino(2-pyridyl)methyl]hydrazine-1-carboxamide			-3.0678	1.14614e-13	0.119262	1.61214
2.502_311.08739	2-{2-oxo-2H,8H,9H-furo[2,3-h]chromen-8-yl}propan-2-yl acetate			-1.90913	2.06555e-07	0.266253	1.15402
2.552_158.09272	2-oxopiperidine-3-carbohydrazide			2.3097	1.29215e-08	4.95781	1.36145
2.558_204.10251	3-ethyl-4-hydroxy-1-methyl-1,2-dihydroquinolin-2-one			-4.74439	2.83322e-05	0.0373075	1.50935
2.562_406.16154	N-[(1S,4S)-4-(1-Benzyl-3,5-dimethyl-1H-pyrazol-4-yl)-2-cyclopenten-1-yl]benzenesulfonamide			-3.82537	8.13652e-06	0.0705421	1.40645
2.595_362.15978	NP-016212			3.93346	1.1832e-11	15.2788	2.10632
2.617_438.15420	FPH			3.90303	1.51488e-12	14.9599	1.76719
2.628_361.17171	AM2201 Benzimidazole analog			-3.67296	3.18328e-07	0.0784022	1.50299
2.644_320.09104	4-(3,4-dihydro-2H-1,5-benzodioxepin-7-ylmethyl)-1lambda~6~,4-thiazinane-1,1-dione			4.7289	1.83748e-17	26.518	2.11393
2.652_289.13944	1,4-dihydroxy-6,6,9a-trimethyl-1H,3H,4H,5H,5aH,6H,7H,8H,9H,9aH-naphtho[1,2-c]furan-3-one			3.49694	2.5637e-19	11.2897	1.80193
2.656_334.13982	NP-016430			-4.3382	0.000478789	0.0494391	1.16349
2.71_573.19067	NP-003251			1.58607	4.1241e-06	3.0023	1.06121
2.734_263.09629	N5-(3-ethyl-6-methyl-2-pyridyl)-4-methyl-1,2,3-thiadiazole-5-carboxamide			1.41898	9.187e-11	2.67396	1.09587
2.734_313.13944	9-{2-[(1,3-benzodioxol-5-ylmethyl)amino]ethyl}-9H-purin-6-amine			1.78642	9.00895e-11	3.44958	1.24076
2.74_478.17930	N-(1,3-Benzodioxol-5-ylmethyl)-2-[(3R,4S)-3-({5-[(phenylsulfanyl)methyl]-1,2-oxazol-3-yl}methyl)-4-piperidinyl]acetamide			-2.67538	9.33589e-15	0.156542	1.57213
2.776_227.06653	3-hydroxy-2-(hydroxymethyl)-2,3,3a,9a-tetrahydro-6H-furo[2',3':4,5][1,3]oxazolo[3,2-a]pyrimidin-6-one			1.9154	6.22042e-09	3.77218	1.29614
2.797_476.17832	2,3-di(acetyloxy)-1-[1,2-di(acetyloxy)ethyl]-4-morpholino-4-oxobutyl acetate			-3.46038	2.75082e-06	0.0908495	1.42467
2.819_264.05378	2-(4-methoxyphenyl)-3-(1H-pyrazol-4-yl)acrylonitrile			1.15902	5.26232e-05	2.23306	1.01373
2.842_174.02231	4-methylpyridine-3-sulfonic acid			5.79012	4.97378e-24	55.3351	2.3457
2.85_210.07703	2-Amino-3-(4-hydroxy-3-methoxyphenyl)propanoic acid			3.15382	1.13679e-09	8.9001	1.84479
2.859_377.13439	NP-009314			-5.5064	1.655e-06	0.0219994	1.78064
2.893_328.13918	7-amino-1,3-dimethyl-2,4-dioxo-5-phenyl-1,3,4,5-tetrahydro-2H-pyrano[2,3-d]pyrimidine-6-carbonitrile			-4.19926	1.11914e-10	0.0544375	1.82332
2.894_310.12852	methyl 5-{[2-(ethoxycarbonyl)-3-oxohex-1-enyl]amino}-2-furoate			-4.45957	5.10172e-11	0.0454502	1.9108
2.902_262.07463	2-[2-(4-chlorophenyl)-2-methylhydrazono]-3-cyclopropyl-3-oxopropanenitrile			-2.10254	0.000150259	0.232848	1.07193
2.925_272.12433	2-{[methyl(2,3,4,5,6-pentahydroxyhexyl)amino]methylidene}malononitrile			-1.80345	3.82792e-05	0.28649	1.04615
2.931_218.13903	6-(3-Methylpiperidino)[1,2,4]triazolo[4,3-b]pyridazine			-3.03346	0.00127696	0.122134	1.07482
2.966_267.07266	1-(4-Chlorophenyl)-4,4,6-trimethyl-1,2,3,4-tetrahydropyrimidine-2-thione			-2.92587	3.41622e-05	0.131591	1.17159
2.97_298.12864	2-{4-[(5-methyl-3-isoxazolyl)carbonyl]piperazino}nicotinonitrile			-2.57243	2.33319e-11	0.168121	1.46271
2.983_266.06949	4-[5-(4-chlorophenyl)-1,3,4-oxadiazol-2-yl]morpholine			2.43886	4.10713e-05	5.42215	1.10095
2.995_297.15552	ethyl 4-(1,3-dimethyl-2,6-dioxo-1,2,3,6-tetrahydropyrimidin-4-yl)tetrahydropyrazine-1(2H)-carboxylate			2.35922	5.63653e-09	5.13094	1.39363
3.001_307.09258	3-(4-nitrophenyl)[1,2,3]triazolo[1,5-a]quinazolin-5-amine			3.82113	2.61824e-18	14.1343	1.91795
3.02_238.09002	5,5-dimethyl-2-phenyl-1,3-thiazolane-4-carboxylic acid			-2.53066	0.000101873	0.17306	1.16872
3.044_296.11363	2-{[3-(3,4,5-trimethoxyphenyl)propanoyl]amino}acetic acid			-2.3532	5.50527e-10	0.195712	1.3435
3.077_277.08193	N-(1-benzothiophen-3-ylmethyl)-N'-(cyclopropylmethyl)thiourea			4.53863	2.64647e-13	23.2414	2.33753
3.085_260.14951	3-amino-4-{2-[4-(tert-butyl)phenyl]diaz-1-enyl}-4,5-dihydro-1H-pyrazol-5-one			-2.20453	2.88728e-06	0.216956	1.12996
3.112_341.15689	ANH			3.49235	1.13557e-07	11.2539	2.03788
3.143_176.14380	5-APDI			-4.08014	8.48628e-05	0.0591227	1.37994
3.162_325.05223	O1-(2,6-dichlorobenzyl)-4-methoxybenzene-1-carbohydroximamide			1.36963	1.27478e-05	2.58404	1.10645
3.164_256.07519	methyl 3-(methylamino)-2-[(4-methyl-1,2,3-thiadiazol-5-yl)carbonyl]but-2-enoate			-4.17722	5.49398e-18	0.0552755	1.96157
3.172_275.06969	N1-(2-cyanophenyl)-2-[(1-methyl-1H-1,2,3,4-tetraazol-5-yl)thio]acetamide			4.46037	5.12014e-19	22.0143	2.01126
3.197_210.11281	MMDA			1.49228	3.33301e-07	2.81333	1.0726
3.199_256.07523	Ethyl 2-{[2-(pyrimidin-2-ylthio)acetyl]amino}acetate			-3.31223	6.19438e-12	0.100674	1.74789
3.214_306.10071	2-(3-Chloro-4-methylphenyl)-6-methyl-4-pyrimidinyl N,N-dimethylcarbamate			2.64836	2.15367e-11	6.26952	1.47734
3.214_425.17084	N-(2-{4-[5-(Acetylamino)-1H-benzimidazol-2-yl]phenyl}-1H-benzimidazol-5-yl)acetamide			-4.7232	0.000717636	0.0378595	1.17819
3.246_304.17677	N-(2-Methoxyethyl)-3-{5-[(2S)-1-methyl-2-pyrrolidinyl]-1,2,4-oxadiazol-3-yl}-2-pyridinamine			2.81656	5.75182e-12	7.04481	1.5597
3.256_243.09769	3-(2-nitrophenoxy)butanoic acid			2.85664	6.7732e-12	7.24324	1.65683
3.257_380.14519	(9S)-5-hydroxy-4,15,16-trimethoxy-10-methyl-10-azatetracyclo[7.7.1.0脗?,芒聛路.0脗a脗l,脗a芒聛路]heptadeca-1(17),2(7),3,5,13,15-hexaen-10-ium-10-olate			4.33272	9.65372e-21	20.1501	2.01226
3.27_254.15019	ethyl 2-{[(1-methyl-3-propyl-1H-pyrazol-4-yl)carbonyl]amino}acetate			2.19259	1.55126e-09	4.57126	1.42818
3.274_248.14940	N1-(1,3,5-Trimethyl-1H-pyrazol-4-yl)-2-cyano-3-(dimethylamino)acrylamide			1.51167	3.89506e-08	2.8514	1.13003
3.289_385.05620	NP-019001			5.47907	2.42561e-24	44.603	2.25168
3.314_312.15543	(1R,3S,5S)-8-methyl-8-azabicyclo[3.2.1]octan-3-yl 3-hydroxy-2-phenylpropanoate			4.45242	2.67901e-18	21.8933	2.0449
3.315_367.15009	2-{2-[5-(Ethoxycarbonyl)-2-morpholinoanilino]-2-oxoethoxy}acetic acid			-3.59149	3.32856e-09	0.0829574	1.69773
3.327_368.22921	VLH			-3.93585	4.3229e-07	0.065342	1.61182
3.334_263.10269	3-[1-(2-Carboxyethyl)-1H-benzo[d]imidazol-2-yl]propanoic acid			1.94861	6.59694e-08	3.86004	1.41977
3.34_221.10359	ethyl 2-cyano-3-[(1-methyl-1H-pyrazol-3-yl)amino]acrylate			-2.32739	2.16769e-06	0.199244	1.35473
3.357_327.19138	N-benzyl-N-isopropyl-N'-(4-isopropylphenyl)thiourea			2.50508	1.86364e-16	5.67679	1.51852
3.372_210.11282	MMDA-2			3.76254	4.7916e-17	13.5718	1.90187
3.383_316.11806	5-[(2-hydroxybenzylidene)amino]-2-(2-methoxyethoxy)benzoic acid			-4.69663	1.31304e-11	0.0385633	1.91854
3.385_318.16603	Ethyl 2-({4-amino-2-[(tert-butoxycarbonyl)amino]-4-oxobutanoyl}amino)acetate			-3.16631	5.40463e-05	0.11139	1.20861
3.395_511.29044	4-Cyano-N-{[(1S,4S,6S)-6-isopropyl-3-methyl-4-(2-{[2-(4-morpholinyl)ethyl]amino}-2-oxoethyl)-2-cyclohexen-1-yl]methyl}benzamide			-4.90021	1.56719e-06	0.033488	1.60964
3.401_337.13955	7-{[(2E)-5-hydroxy-3,7-dimethylocta-2,6-dien-1-yl]oxy}-2H-chromen-2-one			-1.64001	6.56138e-06	0.320854	1.05484
3.406_438.21370	4-OHE2-1-N7Gua			5.46506	8.9723e-26	44.172	2.24897
3.433_348.17673	5'-(furan-3-yl)-4a-hydroxy-2,5-dimethyl-3,4,4a,7,8,8a-hexahydro-2H-spiro[naphthalene-1,3'-oxolane]-2',7-dione			-3.2042	1.18645e-06	0.108503	1.3787
3.453_439.16139	4-hydroxy-7-methyl-2-(2-{[3,4,5-trihydroxy-6-(hydroxymethyl)oxan-2-yl]oxy}propan-2-yl)-2H,3H,5H-furo[3,2-g]chromen-5-one			5.37138	5.79048e-22	41.3947	2.22017
3.46_191.15471	MBZP			1.57917	2.7433e-07	2.98797	1.17668
3.501_340.18656	NP-000510			3.43489	8.09211e-15	10.8145	1.80409
3.529_305.14947	2,4-diaziran-1-yl-6-(1-phenyl-1H-pyrrol-2-yl)-1,3,5-triazine			-2.48768	1.79141e-08	0.178293	1.3573
3.538_293.14956	2-morpholino-2-(3,4,5-trimethoxyphenyl)acetonitrile			3.3981	3.8833e-11	10.5422	1.82049
3.578_265.07458	N1-allyl-3-(4-chlorophenoxy)azetane-1-carboxamide			2.70493	4.95704e-09	6.52027	1.60132
3.587_312.10118	Dipyrone			5.48298	5.4051e-23	44.7242	2.24284
3.591_284.09511	N4-(5-Fluoro-4-imino-3,4-dihydroquinazolin-3-yl)isonicotinamide			-4.0008	2.47729e-14	0.0624654	1.91235
3.595_210.07980	4-Morpholinepropanesulfonic acid			-2.52235	5.24099e-07	0.174059	1.48126
3.605_228.12324	WLH			2.88139	5.5413e-14	7.36861	1.64931
3.607_259.07477	2-(2-chloro-3,4-dimethoxyphenyl)-1,3-dioxane			-1.80316	2.96107e-09	0.286546	1.16254
3.61_290.13871	NP-001057			-2.28426	2.62921e-06	0.205291	1.17788
3.643_260.12820	3-ethoxy-4-(4-isopropylanilino)cyclobut-3-ene-1,2-dione			1.25157	1.54556e-06	2.381	1.06687
3.643_445.11352	NP-018731			-3.83876	2.59993e-07	0.0698903	1.65307
3.644_240.08682	4,6,8-trihydroxy-7-methoxy-3-methyl-3,4-dihydro-1H-2-benzopyran-1-one			3.31093	7.92185e-11	9.92406	1.84505
3.645_240.08679	2-[(carboxymethyl)(methyl)amino]-5-methoxybenzoic acid			3.31774	7.74799e-11	9.97104	1.84813
3.663_363.21243	HPK			-2.02387	3.48105e-09	0.245897	1.22621
3.67_261.04333	N-(3-chlorophenyl)-N'-[2-(2-furyl)vinyl]urea			-1.68918	5.48787e-06	0.310104	1.08256
3.68_245.09267	2-(acetylamino)-3-(1H-indol-3-yl)propanoic acid			1.89435	4.1458e-11	3.71755	1.32342
3.686_388.18660	AB-CHMINACA metabolite M7			2.80317	3.97591e-09	6.97972	1.71848
3.691_466.26617	(2R,3S,4S,5R,6R)-2-({[(2R,3R,4R,5S)-3,4-dihydroxy-5-(hydroxymethyl)oxolan-2-yl]oxy}methyl)-6-{[(2E)-3,7-dimethylocta-2,6-dien-1-yl]oxy}oxane-3,4,5-triol			-4.19077	0.00126528	0.0547586	1.09281
3.698_319.15207	2-[(2S,3R,4S,5R)-5-(Acetamidomethyl)-3,4-dihydroxytetrahydro-2-furanyl]-N-isopropylacetamide			-2.85722	6.92267e-10	0.138004	1.47079
3.723_435.12865	5,7-dihydroxy-2-(4-hydroxyphenyl)-6-[3,4,5-trihydroxy-6-(hydroxymethyl)oxan-2-yl]-3,4-dihydro-2H-1-benzopyran-4-one			-3.26865	5.61468e-10	0.103762	1.55479
3.729_249.08710	Ethyl 2-[3-(acetyloxy)-1,2-dihydropyridin-2-yliden]-2-cyanoacetate			-3.99089	1.28839e-08	0.0628959	1.67787
3.73_242.10244	6,6-dimethyl-4-piperidino-5,6-dihydro-2H-thiine-2-thione			1.45804	8.10983e-07	2.74735	1.13239
3.745_429.23438	1-(4-Methyl-1-piperazinyl)-2-[(3R,4S)-3-({5-[(phenylsulfanyl)methyl]-1,2-oxazol-3-yl}methyl)-4-piperidinyl]ethanone			-6.15294	0.000131768	0.0140533	1.48164
3.748_311.10607	2-[4-(dimethylamino)phenyl]-5-(methylthio)[1,2,4]triazolo[1,5-c]pyrimidine-8-carbonitrile			3.16105	1.27754e-11	8.94479	1.81118
3.756_282.04309	N-Acetyl-3-(3-chloro-4-fluoroanilino)-2-cyanoacrylamide			-4.64691	3.71386e-07	0.0399154	1.63306
3.773_201.08734	N1-[2-(Acryloylamino)-1,2-dihydroxyethyl]acrylamide			3.09701	2.04818e-16	8.55646	1.6322
3.776_201.16010	N'1-(2,2-dimethylpropanoyl)-2,2-dimethylpropanohydrazide			2.17771	0.00068617	4.52434	1.14068
3.779_207.07676	4-oxo-4-[(pyridin-4-ylmethyl)amino]but-2-enoic acid			2.39245	2.50068e-09	5.25048	1.47453
3.785_210.12801	4-Fluoro pentedrone			-3.01429	5.71941e-08	0.123768	1.44139
3.789_220.06406	4-chloro-N~1~-(4-pyridinyl)-1,2-benzenediamine			8.35573	1.87401e-27	327.586	2.79807
3.791_501.24631	NP-019159			-3.7679	0.00346084	0.073409	1.03728
3.805_413.14157	methyl (1S)-6-hydroxy-7-methyl-1-{[(2S,3R,4S,5S,6R)-3,4,5-trihydroxy-6-(hydroxymethyl)oxan-2-yl]oxy}-1H,4aH,5H,6H,7H,7aH-cyclopenta[c]pyran-4-carboxylate			2.5547	8.11931e-08	5.87546	1.34237
3.807_364.11381	1-{2-[(4-chlorophenyl)sulfonyl]-1-phenylethyl}piperidine			4.89972	1.26086e-13	29.8513	2.26449
3.819_382.16083	Benthiavalicarb isopropyl			-1.70728	1.39271e-06	0.306236	1.11999
3.827_427.21882	N1-(3-phenylprop-2-enylidene)-4-{4-[(3-phenylprop-2-enylidene)amino]benzyl}aniline			-2.59023	1.79259e-07	0.166059	1.35638
3.831_327.20249	PEG n7			4.32394	7.12027e-13	20.0279	2.13851
3.833_363.10747	NP-001610			2.69062	3.32544e-08	6.45589	1.92143
3.844_532.21868	NP-001257			-6.21497	5.07207e-06	0.0134619	1.73926
3.858_311.00862	3-Nitrobenzaldehyde 1-(3,5-dichloro-4-pyridyl)hydrazone			-3.16757	1.35502e-24	0.111292	1.71482
3.86_437.09570	4-{2-[2-(2,4-dichlorophenoxy)phenyl]diaz-1-enyl}-3,5-dimethyl-1-phenyl-1H-pyrazole			-8.0455	9.78129e-25	0.00378497	2.72861
3.861_245.15022	ethyl 1-{[(5-methyl-3-phenyl-4-isoxazolyl)amino]carbonyl}-3-piperidinecarboxylate			2.19465	0.00119015	4.5778	1.12019
3.892_429.22324	Nalpha-{[(2R)-1-(4-morpholinylcarbonyl)-2-piperazinyl]carbonyl}-D-tryptophanamide			4.30954	2.23725e-11	19.829	1.75549
3.953_259.14757	3,6-diphenyl-1,3a,4,6a-tetrahydropentalene			6.61003	1.4678e-25	97.6825	2.46879
3.956_313.18689	SPK			5.22361	1.12607e-22	37.3648	2.2393
3.96_399.21250	NP-006605			6.86449	9.54551e-30	116.524	2.54404
3.961_379.13598	SNH			-2.89092	2.83623e-06	0.134817	1.29769
3.973_361.09596	4-[(methylsulfonyl)amino]-N'-[(4-toluidinocarbonyl)oxy]benzenecarboximidamide			1.64197	1.49455e-08	3.12092	1.16468
3.978_421.19692	Sunitinib			3.4835	1.00944e-16	11.1851	1.811
3.997_370.14959	3-{[2-({[2,3-dihydroxy-2-(1-hydroxyethyl)butanoyl]oxy}methyl)phenyl]carbamoyl}propanoic acid			3.31899	9.47717e-13	9.97962	1.86994
4.002_378.15464	5,11,17,19-tetrahydroxy-15-methyl-2-oxapentacyclo[9.8.0.0脗a,脗l.0芒聛麓,芒聛a.0脗a脗?,脗a芒聛路]nonadeca-4,6,8-triene-10,13-dione			-3.35335	5.39891e-05	0.0978453	1.19139
4.003_251.17549	(1R,2S,3R,4R)-3-(Isobutylamino)-4-(3-pyridinyl)-1,2-cyclopentanediol			5.54919	7.75657e-22	46.8244	2.26658
4.037_370.20831	TLH			4.58578	5.71278e-18	24.0136	2.06278
4.072_333.18083	N-({(2R,3S,4R,5S)-3,4-Dihydroxy-5-[2-(isopropylamino)-2-oxoethyl]tetrahydro-2-furanyl}methyl)-4-methylbenzamide			2.86296	2.48919e-09	7.27507	1.74104
4.076_345.16549	NP-022473			2.08062	1.17468e-08	4.2299	1.40306
4.094_303.13731	2-[(3-chlorobenzyl)amino]-3-(neopentylamino)but-2-enedinitrile			5.15711	4.40144e-17	35.6817	2.1315
4.124_229.09733	1-hydroxy-2-phenyl-1,5,6,7-tetrahydro-4H-benzimidazol-4-one			2.18715	3.31318e-15	4.55405	1.41565
4.136_275.10262	1-Acetyl-3-[(4-methoxyphenyl)methylene]tetrahydropyrazine-2,5-dione			1.97261	1.35322e-11	3.92479	1.23873
4.138_185.08117	5-amino-1-phenyl-1H-pyrazole-4-carbonitrile			1.5454	1.03064e-10	2.91885	1.1412
4.149_278.10580	2-[(3S)-1-(2-Chlorobenzyl)-3-pyrrolidinyl]-5-methyl-1,3,4-oxadiazole			2.14655	5.54583e-08	4.42767	1.47739
4.151_325.15486	8,9-Dimethoxy-1,2,3,5,6,10b-hexahydrobenzo[5,6][1,4]diazepino[7,1-a]isoquinolin-2-one			3.50975	4.38769e-12	11.3905	1.95167
4.155_337.03842	2-(4-chlorobenzoyl)-3-[(3-oxo-1,3-dihydroisobenzofuran-5-yl)amino]acrylonitrile			-5.15274	1.65533e-15	0.0281106	2.20979
4.17_359.10123	2,3,7,8-tetrahydrodiimidazo[2,1-b:1,2-e][1,3,5]thiadiazine-5-thione			3.52706	2.9826e-09	11.5279	2.18145
4.17_374.06581	N1-(2,3-dihydro-1,4-benzodioxin-2-ylmethyl)-3-(trifluoromethyl)benzene-1-sulfonamide			3.68056	5.11773e-09	12.8221	2.32871
4.179_229.09792	3-Carboxymedetomidine			4.3605	7.58652e-25	20.542	2.03034
4.194_291.12675	2-(1H-1,2,3-benzotriazol-1-yl)-N-(2,3-dihydro-1H-inden-2-yl)acetamide			2.81604	2.46108e-07	7.04225	1.71728
4.194_399.20135	1-Ethyl-3-[(1S,2S,3S,4R,5R)-3-hydroxy-4-(4-phenyl-1-piperazinyl)-6,8-dioxabicyclo[3.2.1]oct-2-yl]urea			1.09124	0.000167875	2.13057	1.00105
4.207_358.13962	3-{[6,7-dimethoxy-1-methyl-3,4-dihydro-2(1H)-isoquinolinyl]carbonyl}-2-pyrazinecarboxylic acid			3.00394	5.55018e-13	8.02188	1.68788
4.211_275.10624	methyl 5-[(tert-butylamino)sulfonyl]-1-methyl-1H-pyrrole-2-carboxylate			2.45818	0.000285102	5.49523	1.08793
4.214_246.09898	2-(4-methyl-2,3,5,6,7,7a-hexahydro-1H-inden-5-yliden)hydrazine-1-carboxamide			1.78647	1.11088e-08	3.44969	1.26706
4.217_324.18054	NP-009821			5.00769	3.12501e-18	32.171	2.18684
4.243_289.11827	Ethyl 2-cyano-2-[4-(hydroxymethyl)-5-phenyl-1,3-oxazolan-2-yliden]acetate			3.37636	3.98131e-15	10.3845	1.79271
4.252_157.09744	N1-(2-amino-2-oxoethyl)pent-3-enamide			-2.54142	7.68062e-08	0.171774	1.3068
4.259_380.23309	1-Propionyl-LSD			1.933	6.27002e-05	3.81849	1.21898
4.282_319.15399	14,16-dihydroxy-3-methyl-3,4,5,6,7,8,9,10-octahydro-1H-2-benzoxacyclotetradecine-1,7-dione			-5.00322	4.8176e-12	0.0311804	2.0268
4.286_256.11804	dimethyl 4-(acetylamino)cyclohex-3-ene-1,3-dicarboxylate			1.62398	1.9338e-08	3.08223	1.16361
4.288_372.16525	PPH			1.31657	0.00013598	2.49073	1.11594
4.29_446.19000	3-[4-(tert-butyl)-3-({5-[3-(trifluoromethyl)phenyl]-2H-1,2,3,4-tetraazol-2-yl}methyl)phenyl]-1,2,4-oxadiazole			-3.88404	6.37547e-09	0.0677308	1.66642
4.324_291.08971	Ethyl 2-(2-amino-1,3-thiazol-4-yl)-2-(2-phenylhydrazono)acetate			-5.34085	1.08563e-06	0.0246743	1.77668
4.329_485.22870	1-(4-{5-[(2S)-1-(2-Methoxybenzyl)-2-pyrrolidinyl]-1,2,4-oxadiazol-3-yl}-2-pyridinyl)-4-piperidinecarboxamide			7.60722	2.12357e-22	194.986	2.65731
4.344_301.16452	O1-{[3-(tert-butyl)-1-methyl-1H-5-pyrazolyl]carbonyl}-1-benzenecarbohydroximamide			-2.42215	2.70944e-12	0.186579	1.43151
4.35_427.11701	N-(2,4-difluorophenyl)-N'-[4-(4-methoxyphenyl)-1-methyl-3-(trifluoromethyl)-1H-pyrazol-5-yl]urea			-2.72578	2.93652e-09	0.151167	1.52126
4.356_300.10770	3-(2,7-dimethylpyrazolo[1,5-a]pyrimidin-6-yl)-5-(trifluoromethyl)-4,5-dihydro-1H-pyrazol-5-ol			2.86799	1.51312e-11	7.30046	1.69258
4.363_263.12824	NP-022500			2.02156	1.48878e-08	4.06024	1.32859
4.365_307.08457	N'-{[(1-Acetylpiperidin-4-yl)carbonyl]oxy}-4-chlorobenzenecarboximidamide			-3.78692	1.41506e-06	0.0724476	1.51331
4.365_347.11667	2-{[5-Hydroxy-4-(1-phenylethyl)-4H-1,2,4-triazol-3-yl]sulfanyl}-1-morpholino-1-ethanone			3.72423	8.85115e-11	13.2161	1.86679
4.377_367.04900	N'1-quinoxalin-2-yl-2-(trifluoromethyl)benzene-1-sulfonohydrazide			-4.98905	1.66778e-12	0.0314881	2.0624
4.382_323.16094	NP-020655			3.45853	1.15603e-10	10.9931	1.96968
4.383_249.10572	2-(2-ethyl-6-methylanilino)-4,5-dihydro-6H-1,3-thiazin-6-one			2.24359	4.0609e-07	4.73573	1.53953
4.395_293.11668	Coumatetralyl			3.13715	2.86426e-06	8.79786	1.32031
4.407_400.15042	N1-(2-{[(cyclopropylmethyl)amino]carbonyl}phenyl)-2,6-dimethoxy-3-nitrobenzamide			2.19043	7.48297e-11	4.5644	1.42676
4.428_295.01370	methyl 2-[4-(trifluoromethyl)benzoyl]hydrazine-1-carbodithioate			-3.437	1.05173e-10	0.0923339	1.63376
4.429_389.13200	3-benzyl-5-ethyl-4-hydroxy-6-phenyl-1-(1,3-thiazol-2-yl)-1,2-dihydropyridin-2-one			-3.66764	3.42541e-07	0.0786918	1.56202
4.429_405.10564	ethyl 3-[2-(2-chlorobenzylidene)hydrazino]-6,6-dimethyl-4-oxo-4,5,6,7-tetrahydrobenzo[c]thiophene-1-carboxylate			-4.67626	7.06303e-08	0.0391117	1.8026
4.443_345.14436	ethyl 6-amino-5-cyano-4-(3,5-dimethoxyphenyl)-2-methyl-4H-pyran-3-carboxylate			-2.26722	7.6857e-14	0.207729	1.40845
4.46_377.18173	5-(5-{(2S)-1-[(1-Methyl-1H-benzimidazol-2-yl)methyl]-2-pyrrolidinyl}-1,2,4-oxadiazol-3-yl)-4-pyrimidinamine			5.8398	1.63213e-17	57.2735	2.35023
4.465_381.15421	NP-020246			6.41703	1.39985e-12	85.451	2.63056
4.465_398.18088	NP-005366			6.11712	5.46538e-15	69.4122	2.4721
4.48_350.17089	tert-butyl 4-(4-nitrobenzoyl)-1,4-diazepane-1-carboxylate			3.74857	1.03807e-12	13.441	1.87495
4.502_211.04328	2-[(2-Phenoxyethyl)thio]acetic acid			5.43355	9.39769e-14	43.2177	2.22596
4.506_441.22325	ERH			-3.43166	5.69917e-05	0.0926759	1.28535
4.513_401.12308	3,8-Dihydroxy-7,14-dimethoxy-17-methyl-12,16,21-trioxapentacyclo[15.3.1.02,15 04,13 06,11]henicosa-2(15),3,6,8,10,13-hexaen-5-one			-3.81318	2.87335e-06	0.0711406	1.4739
4.52_390.17584	4-oxo-4-[(3-{4-[4-(trifluoromethyl)pyrimidin-2-yl]piperazino}propyl)amino]butanoic acid			2.52815	1.36698e-09	5.76833	1.70191
4.52_393.15173	SQH			-3.41765	8.54987e-11	0.0935804	1.6199
4.533_362.13547	ethyl 4-[({[5-methyl-2-(trifluoromethyl)-3-furyl]amino}carbonyl)amino]tetrahydro-1(2H)-pyridinecarboxylate			7.0444	6.99555e-24	132.001	2.59048
4.537_245.04849	(2-amino-5-chlorophenyl)(phenyl)methanone oxime			-2.20186	0.000214736	0.217358	1.05129
4.546_365.15952	(3alpha,4beta,8alpha)-3,8-Dihydroxy-12,13-epoxytrichothec-9-ene-4,15-diyl diacetate			5.94583	3.99276e-16	61.6416	2.42176
4.552_365.17060	N1-{2-[(2-cyanoethyl)thio]phenyl}-2-cyclopentyl-2-phenylacetamide			2.25309	3.58541e-10	4.76702	1.47055
4.562_333.11153	5-[5-(ethylsulfonyl)-2-hydroxyanilino]-5-oxopentanoic acid			3.55078	5.92525e-13	11.719	1.74081
4.582_156.04799	5-Acetyl-2,4-dimethylthiazole			4.64275	2.78115e-29	24.9809	2.07984
4.624_412.19662	Ethyl [(1S,4S,5S)-4-({[(3-fluorophenyl)sulfonyl]amino}methyl)-5-isopropyl-2-methyl-2-cyclohexen-1-yl]acetate			3.17894	4.21721e-07	9.05641	1.42661
4.635_328.18660	Avobenzone			3.92054	1.46078e-14	15.1425	1.93055
4.644_326.12738	(3R,5S)-5-(3-Cyclopropyl-1,2,4-oxadiazol-5-yl)-1-(4-fluorobenzyl)-3-pyrrolidinol			-2.11889	2.90167e-07	0.230224	1.17958
4.675_427.16464	ethyl 1-(4-fluorophenyl)-4-[2-(4-methoxyanilino)-2-oxoethyl]-2-methyl-5-oxo-2,5-dihydro-1H-pyrrole-3-carboxylate			7.80026	9.85775e-41	222.901	2.71377
4.717_327.14513	2-(4-methylphenyl)-5-(3,4,5-trimethoxyphenyl)-2H-1,2,3,4-tetraazole			-7.04962	3.15427e-06	0.00754836	1.97941
4.746_459.12913	NP-010746			-3.18148	3.03041e-06	0.110225	1.31332
4.779_328.06032	N-[methyl(oxo)phenyl-lambda~6~-sulfanylidene]-4-(trifluoromethyl)benzamide			1.22337	1.44002e-05	2.33491	1.08482
4.791_311.13902	3-[2-(Benzyloxy)-3,6-dimethoxyphenyl]-1H-pyrazole			1.56432	9.82886e-06	2.95738	1.12155
4.795_320.16437	N-benzyl-2-(6-methoxy-2-naphthyl)propanamide			5.07472	4.96887e-22	33.7011	2.19956
4.811_467.15866	N-{4-[(2R,3R)-3-(Hydroxymethyl)-5-oxo-4-(3-pyridinylmethyl)-2-morpholinyl]phenyl}-5-methyl-1,2-oxazole-3-carboxamide			1.80822	3.54604e-06	3.50211	1.07171
4.818_217.09740	6-methoxy-2,3,4,9-tetrahydro-1H-beta-carbolin-1-one			2.61561	1.56688e-11	6.12881	1.51991
4.823_306.20626	2-Methoxy-N-[(3S,3aS,8S,9S,9aS,9bS)-3,5a,9-trimethyl-2-oxododecahydronaphtho[1,2-b]furan-8-yl]acetamide			4.17533	1.59877e-15	18.0676	2.03217
4.824_293.18592	3-{[(hexylamino)carbonyl]amino}-3-phenylpropanoic acid			-5.28331	3.04144e-12	0.0256783	2.03137
4.839_306.18122	NP-020514			4.25521	5.40126e-12	19.0961	2.14507
4.84_300.20707	5-Methyl-2-[(3S)-1-(1-methyl-4-piperidinyl)-3-pyrrolidinyl]-1,3-benzoxazole			2.9818	1.14996e-08	7.89973	1.86432
4.86_542.27178	N-{4-[2-(Cyclopentylamino)-2-oxoethyl]-7-hydroxy-8-(hydroxymethyl)-4a,8-dimethyl-4,4a,5,6,7,8,8a,9-octahydronaphtho[2,3-d][1,3]thiazol-2-yl}-4-methoxybenzamide			-5.57749	2.1779e-05	0.0209415	1.62291
4.878_223.10793	6-hydroxy-1-(3-methoxypropyl)-4-methyl-2-oxo-1,2-dihydropyridine-3-carbonitrile			2.22404	4.36731e-09	4.67201	1.46104
4.886_232.06122	2-cyano-3-(3,4-dimethoxyphenyl)acrylic acid			-2.9741	1.67638e-07	0.127264	1.38102
4.911_199.08694	2-cyano-2-(2,3-dihydro-1H-inden-1-yliden)acetamide			4.90579	1.38161e-22	29.9772	2.11968
4.923_302.11684	Methyl (6S)-3-isopropyl-5-(methylsulfonyl)-4,5,6,7-tetrahydro-3H-imidazo[4,5-c]pyridine-6-carboxylate			3.26304	1.05535e-16	9.60006	1.68248
4.931_328.16563	NP-007441			2.98408	1.2163e-11	7.91222	1.73717
4.939_319.20158	3,3-dimethyl-5-oxo-5-(2-piperidinoanilino)pentanoic acid			2.96893	4.42724e-14	7.82957	1.7024
4.962_300.08739	2-(benzoylamino)-4,5-dimethoxybenzoic acid			1.55329	6.94654e-05	2.93486	1.08516
4.963_320.11281	N6-Cyclopropyl-3-[4-(trifluoromethyl)phenyl][1,2,4]triazolo[4,3-b]pyridazin-6-amine			3.23231	1.56066e-12	9.39774	1.7499
4.968_281.08081	5-hydroxy-6,7-dimethoxy-2-phenyl-4H-chromen-4-one			-3.78398	6.07293e-11	0.0725953	1.71353
4.983_373.17569	NP-005562			2.66271	2.83372e-09	6.33224	1.67981
5.002_418.21909	1-{[(2R,3S,4R,5S)-3,4-Dihydroxy-5-{2-[(2R)-2-(methoxymethyl)-1-pyrrolidinyl]-2-oxoethyl}tetrahydro-2-furanyl]methyl}-3-isopropylurea			-2.75955	1.89526e-06	0.14767	1.33022
5.013_318.13352	1-butyl-5-[2-(4-cyanophenyl)hydrazono]-4-methyl-2,6-dioxo-1,2,5,6-tetrahydropyridine-3-carbonitrile			2.3312	5.93369e-08	5.03225	1.47443
5.013_344.11279	5-(tert-butyl)-3-methyl-N-(4-methylphenyl)thieno[3,2-b]thiophene-2-carboxamide			1.72037	0.00024918	3.29521	1.21463
5.045_355.11842	(3R,5S)-1-(1H-Imidazol-2-ylmethyl)-5-[3-(3-nitrophenyl)-1,2,4-oxadiazol-5-yl]-3-pyrrolidinol			6.52293	1.9997e-06	91.9597	1.74555
5.06_345.18164	ethyl 5-{[5-(ethoxycarbonyl)-3,4-dimethyl-1H-pyrrol-2-yl]methyl}-3,4-dimethyl-1H-pyrrole-2-carboxylate			-3.16873	6.10584e-08	0.111203	1.52636
5.066_311.09134	3-(2,3-dihydro-1,4-benzodioxin-6-yl)-7-hydroxy-2-methyl-4H-chromen-4-one			2.91878	1.67644e-10	7.56208	1.66984
5.075_393.21311	(3R,4R)-3-{[4-(2-Amino-2-oxoethoxy)benzoyl]amino}-4-hydroxy-N-isopropyl-1-azepanecarboxamide			-3.03112	1.0098e-05	0.122332	1.30705
5.09_267.09029	N'-(cyclohexylcarbonyl)-4-methyl-1,2,3-thiadiazole-5-carbohydrazide			-2.68654	2.53449e-10	0.155336	1.48822
5.09_301.16453	N-(2-Morpholinoethyl)-4-(1H-pyrazol-1-yl)benzamide			3.80412	5.78641e-09	13.9686	1.92092
5.093_219.12296	3-(3,4,5-trimethoxyphenyl)propanoic acid			-2.47857	1.20399e-08	0.179422	1.35087
5.098_283.11539	N'-Cyano-N-[2-(trifluoromethyl)phenyl]pyrrolidine-1-carboximidamide			2.34524	3.94045e-08	5.08145	1.52482
5.098_318.12697	Methyl (6S)-5-(4-fluorobenzoyl)-3-methyl-4,5,6,7-tetrahydro-3H-imidazo[4,5-c]pyridine-6-carboxylate			-2.10059	0.000141561	0.233163	1.01116
5.099_366.20228	1-[(1S,2S,3S,4R,5R)-4-(Diethylamino)-3-hydroxy-6,8-dioxabicyclo[3.2.1]oct-2-yl]-3-(4-methoxyphenyl)urea			-1.96745	1.82974e-05	0.255704	1.04384
5.11_304.11788	3-amino-2,6-diphenyl-4,7-dihydro-2H-pyrazolo[3,4-d]pyrimidin-4-one			4.42758	1.59643e-11	21.5196	2.17399
5.116_392.18238	NP-022373			-2.91664	1.88696e-05	0.132436	1.24641
5.119_285.12336	3-(1-cyano-1,2-dihydroisoquinolin-2-yl)-3-oxopropyl propionate			1.91666	1.33402e-07	3.77549	1.27011
5.124_352.16544	2-[1-(4-isobutylphenyl)ethyl]-5-(3-nitrophenyl)-1,3,4-oxadiazole			-2.76748	2.08328e-07	0.14686	1.32352
5.143_318.19099	1-[4,5-bis(hydroxymethyl)-3-methoxy-2-methylphenoxy]-3-methylbutane-2,3-diol			-2.00337	5.65659e-06	0.249417	1.10036
5.156_265.05688	N-(5-cyclopropyl-1,3,4-thiadiazol-2-yl)-1,3-benzodioxole-5-carboxamide			5.87585	1.59137e-18	58.723	2.36712
5.16_443.21781	RMH			-6.48849	4.67869e-05	0.011137	1.64951
5.172_283.20160	ethyl 4-[(cyclohexylcarbonyl)amino]tetrahydro-1(2H)-pyridinecarboxylate			-2.78252	8.74239e-11	0.145338	1.60987
5.202_213.06369	4-methyl-2,3-dihydro-1H-pyrrolo[3,4-c]quinoline-1,3-dione			2.09817	3.09538e-06	4.28166	1.84887
5.207_307.20156	tert-butyl 4-(4-methoxyanilino)tetrahydro-1(2H)-pyridinecarboxylate			-3.74023	8.13486e-06	0.0748306	1.39148
5.212_320.14917	Diethyl 4-(2-furyl)-2,6-dimethyl-1,4-dihydropyridine-3,5-dicarboxylate			1.6758	5.97212e-07	3.19496	1.26127
5.225_239.17554	1,5-Ditetrahydro-1H-pyrrol-1-ylpentane-1,5-dione			-3.30402	0.0019412	0.101249	1.0213
5.227_311.14884	(2S,3R,4S,5S,6R)-2-[4-hydroxy-2-methyl-5-(propan-2-yl)phenoxy]-6-(hydroxymethyl)oxane-3,4,5-triol			1.77737	8.40624e-10	3.428	1.22394
5.232_320.18558	4-{3-[(3,4-dihydroxyphenyl)methyl]-2-methylbutyl}benzene-1,2-diol			-2.41821	1.28622e-08	0.187088	1.38979
5.244_331.15392	1,7-bis(3,4-dihydroxyphenyl)heptan-3-one			6.35737	5.85707e-13	81.9895	2.60618
5.255_222.14907	3,4-MDPA			2.46443	4.67149e-06	5.5191	1.37901
5.255_440.23932	RQH			-2.35814	6.82214e-08	0.195042	1.28498
5.267_415.22266	benzyl N-(1-{[(3,4-dimethoxyphenethyl)amino]carbonyl}-2-methylpropyl)carbamate			-5.8507	5.19953e-05	0.0173287	1.56771
5.277_360.14741	(5-hydroxy-3-methyl-1-phenyl-1H-pyrazol-4-yl)(5-methyl-2-phenyl-2H-1,2,3-triazol-4-yl)methanone			2.3982	8.56882e-10	5.27146	1.48437
5.3_303.18015	NP-018131			-4.47786	1.66405e-13	0.0448775	2.02512
5.3_627.33493	Tanespimycin			-7.30649	1.05549e-12	0.00631724	2.4474
5.301_403.10506	diethyl 2-({[4-(5-cyano-2-methyl-6-oxo-1,6-dihydro-3-pyridinyl)-1,3-thiazol-2-yl]amino}methylene)malonate			-4.68717	3.49956e-13	0.038817	2.22254
5.31_348.19173	5-Fluoro AMB metabolite 5			2.65392	1.4242e-11	6.29376	1.61253
5.311_254.10240	methyl 2-(acetylamino)-4,5-dimethoxybenzoate			2.44093	4.09136e-11	5.42993	1.54403
5.324_378.23861	N-{4-[(2R,3R)-3-(Hydroxymethyl)-4-isobutyl-5-oxo-2-morpholinyl]phenyl}cyclobutanecarboxamide			-4.05022	1.38595e-09	0.0603617	1.73036
5.335_321.21719	ethyl 2-{[(hexylamino)carbonyl]amino}-3-phenylpropanoate			2.23948	4.59252e-10	4.72228	1.44853
5.351_251.09546	N1-(4-pyridylmethyl)-2-cyano-3-(1H-pyrrol-2-yl)acrylamide			1.99403	1.06737e-08	3.98348	1.27024
5.351_305.12442	2-{2-[4-(3-Cyano-2-pyridinyl)piperazino]-2-oxoethoxy}acetic acid			1.38432	5.7713e-08	2.61048	1.09205
5.37_420.23419	1-[2-({[1-(2'-fluoro[1,1'-biphenyl]-4-yl)propylidene]amino}oxy)-2-oxoethyl]adamantane			-3.09985	3.17249e-06	0.116641	1.40229
5.404_272.12161	N-benzyl-N'-methyl-N-(pyridin-3-ylmethyl)thiourea			1.80128	1.57628e-06	3.48529	1.30186
5.43_344.21788	CP-642931			-2.5074	0.000180234	0.175872	1.08094
5.455_288.09003	[3-(3,5-dimethyl-1H-pyrrol-2-yl)-1H-pyrazol-1-yl](4-methyl-1,2,3-thiadiazol-5-yl)methanone			4.30267	5.76403e-06	19.7347	1.46007
5.456_434.22861	1-[4-(4-{5-[(2S)-1-(2-Pyridinylmethyl)-2-pyrrolidinyl]-1,2,4-oxadiazol-3-yl}-2-pyridinyl)-1-piperazinyl]ethanone			2.78533	9.14684e-09	6.89392	1.66693
5.459_342.19089	Fenethylline			2.37333	4.42239e-09	5.18135	1.52876
5.475_311.10599	2-{[2-(2-morpholinoanilino)-2-oxoethyl]sulfanyl}acetic acid			3.92534	5.00543e-14	15.1931	2.00892
5.48_416.05529	2-(2-chloro-3,4-dimethoxyphenyl)-4-(2-thienyl)-2,3-dihydro-1,5-benzothiazepine			3.18137	4.33424e-16	9.07169	1.72245
5.481_369.06409	O1-{[5-(3-Thienyl)-1,2,4-oxadiazol-3-yl]methyl}-4-(trifluoromethyl)benzene-1-carbohydroximamide			3.1194	1.63398e-15	8.69026	1.70425
5.497_227.08173	1,3-dipyridin-3-ylpropane-1,3-dione			4.69892	6.47974e-12	25.9726	1.9558
5.498_413.20709	5-(5-{5-[(2S)-1-(Cyclohexylmethyl)-2-pyrrolidinyl]-1,2,4-oxadiazol-3-yl}-2-pyridinyl)pyrimidine			-4.31255	0.000264541	0.050326	1.22322
5.524_780.45772	NP-022233			-2.64231	0.000259686	0.160172	1.3467
5.526_238.05339	ethyl 2-cyano-3-(5-methoxy-2-thienyl)acrylate			3.31949	1.76326e-14	9.98311	1.74301
5.55_349.16448	diethyl 4-hydroxy-4-methyl-6-oxo-2-phenylcyclohexane-1,3-dicarboxylate			5.94464	3.28722e-13	61.5907	2.47998
5.555_450.24619	6-{3-[(3,4-dimethoxyphenyl)methyl]-4-methoxy-2-(methoxymethyl)butyl}-4-methoxy-2H-1,3-benzodioxole			5.80765	4.80006e-15	56.0116	2.25034
5.559_392.21792	5-(5-{5-[(2S)-1-(1-Methyl-4-piperidinyl)-2-pyrrolidinyl]-1,2,4-oxadiazol-3-yl}-2-pyridinyl)pyrimidine			2.88534	8.33592e-09	7.3888	1.72971
5.563_356.14916	Methyl 3-[2-(benzoylamino)-3-ethoxy-3-oxopropyl]benzoate			2.82035	3.92419e-08	7.06331	1.80417
5.583_370.11059	6-[1,1'-biphenyl]-4-yl-3-(4-pyridinyl)-7H-[1,2,4]triazolo[3,4-b][1,3,4]thiadiazine			-2.55606	0.00024918	0.170039	1.03098
5.59_300.12288	3-benzyl-4-hydroxy-5-(4-hydroxyphenyl)-2,5-dihydrofuran-2-one			-2.31113	4.96429e-05	0.201503	1.03582
5.608_566.20554	(2S,3S,4R,5R)-4-hydroxy-2,5-bis(hydroxymethyl)-2-{[(2R,3R,4S,5S,6R)-3,4,5-trihydroxy-6-(hydroxymethyl)oxan-2-yl]oxy}oxolan-3-yl (2E)-3-(4-hydroxy-3,5-dimethoxyphenyl)prop-2-enoate			-5.03671	0.000553919	0.0304648	1.33506
5.619_430.27003	(4aS,9aR)-2-[(4-Methoxyphenyl)acetyl]-7-[2-(4-morpholinyl)ethyl]decahydro-6H-pyrido[3,4-d]azepin-6-one			-5.39311	4.38498e-05	0.0237964	1.5263
5.68_357.13318	3-hydroxy-3,4-bis[(4-hydroxy-3-methoxyphenyl)methyl]oxolan-2-one			4.61352	0.000922432	24.4798	1.14926
5.681_277.19106	6-(4-phenylpiperazino)hexanoic acid hydrochloride			3.05473	1.78717e-05	8.30934	1.33091
5.693_327.14382	1-phenyl-2-[(2-{[4-(trifluoromethyl)pyrimidin-2-yl]amino}ethyl)amino]ethan-1-ol			3.49197	0.000842095	11.2509	1.00318
5.712_868.50998	Solanid-5-en-3-yl 6-deoxy-alpha-L-mannopyranosyl-(1-2)-[beta-D-glucopyranosyl-(1-3)]-beta-D-mannopyranoside			-2.466	0.00595107	0.180992	1.02123
5.717_386.17435	5-(5-{5-[(2S)-1-(4-Pyridinylmethyl)-2-pyrrolidinyl]-1,2,4-oxadiazol-3-yl}-2-pyridinyl)pyrimidine			6.35674	3.04146e-34	81.954	2.45097
5.718_408.16536	NP-017379			-1.63296	1.02004e-05	0.322425	1.29393
5.733_190.08995	2-(tert-butyl)-1,3-thiazolane-4-carboxylic acid			5.11682	5.96696e-22	34.699	2.16478
5.787_236.12828	3-(cyclopentyloxy)-4-methoxybenzaldehyde oxime			2.59748	2.08658e-10	6.05228	1.5415
5.832_441.20212	(2S,5aS,8aR)-6-(3-Chlorobenzyl)-1-methyl-2-[3-oxo-3-(1-pyrrolidinyl)propyl]octahydropyrrolo[3,2-E][1,4]diazepin-5(2H)-one			-3.94637	5.12325e-06	0.0648672	1.45805
5.84_391.19755	NP-005516			3.06071	3.4461e-14	8.34381	1.59106
5.852_312.14409	(4S,5R,8R,12R)-12-hydroxy-12-(hydroxymethyl)-3,4-dimethyl-11-oxo-10-oxatricyclo[6.4.0.0脗a,芒聛碌]dodeca-2,6-diene-7-carboxylic acid			1.20258	2.16779e-11	2.3015	1.00598
5.855_370.20145	NP-012888			-3.70486	6.17055e-10	0.0766878	1.74618
5.865_344.20661	3-hydroxy-6-[(4E)-3-hydroxy-2,4-dimethylhept-4-enamido]-2,4-dimethyl-5-oxohexanoic acid			3.61308	3.72396e-14	12.2362	1.88261
5.866_285.07563	(2Z)-6-hydroxy-2-[(4-hydroxy-3-methoxyphenyl)methylidene]-2,3-dihydro-1-benzofuran-3-one			-3.76296	1.92535e-06	0.0736609	1.45618
5.876_420.22811	N-Benzyl-2-[(3R,4S)-3-{[5-(phenoxymethyl)-1,2-oxazol-3-yl]methyl}-4-piperidinyl]acetamide			2.09157	2.00837e-07	4.26211	1.26105
5.888_359.16005	ethyl 4-[2-(3,4,5-trimethoxybenzylidene)hydrazino]benzoate			5.37344	1.0752e-23	41.4539	2.217
5.903_273.15979	4-Cyclohexyl-1-methyl-2,3,4,5-tetrahydro-1H-1,4-benzodiazepine-2,5-dione			-3.14915	2.82662e-05	0.112722	1.33066
5.903_590.32287	NP-020480			-2.82371	2.00398e-07	0.141246	1.37538
5.906_442.21866	2-[(1S,4S,5S)-4-(Benzenesulfonamidomethyl)-5-isopropyl-2-methyl-cyclohex-2-en-1-yl]-N-(2-pyridyl)acetamide			-4.80639	6.67597e-06	0.0357382	1.621
5.909_305.18590	3,4-Methylenedioxy U-47700			1.94686	9.67774e-07	3.85534	1.14409
5.912_346.22229	NP-022510			4.21104	1.92695e-17	18.5204	2.01629
5.93_434.18105	NP-011150			-6.58187	5.79266e-19	0.010439	2.48187
5.939_370.14299	3-benzyl-1-methyl-2-oxo-1,2-dihydroquinolin-4-yl benzoate			5.92194	3.18655e-28	60.6291	2.36741
5.955_302.06851	5-(1,3-benzodioxol-5-yl)-3-(4-chlorophenyl)-4,5-dihydro-1H-1,2,4-triazole			-2.20388	2.3351e-06	0.217053	1.19588
5.965_307.14401	2-[(2-cyclohex-1-en-1-ylethyl)amino]-2-(1,3-dioxo-1,3-dihydro-2H-inden-2-ylidene)acetonitrile			-3.74516	0.000180644	0.0745753	1.24915
5.966_164.10728	4-Hydroxyephedrine			2.22147	7.24186e-10	4.66368	1.43276
6.012_265.07069	NP-010026			-1.71794	9.22754e-07	0.303983	1.14749
6.036_239.08234	2-[2-(3,4-dichloro-2-cyanophenyl)hydrazono]malononitrile			-2.24317	3.83265e-06	0.211221	1.5185
6.041_400.14315	ethyl 1-(tert-butyl)-3-{[(5-hydroxy-4-phenyl-4H-1,2,4-triazol-3-yl)thio]methyl}-1H-pyrazole-5-carboxylate			-5.30351	2.55988e-05	0.0253212	1.57087
6.067_339.09030	O1-(4-chlorobenzoyl)-2-(1-naphthyl)ethanehydroximamide			2.74517	1.27704e-09	6.70467	1.56099
6.067_386.08102	N'1-{[5-(3-nitrophenyl)-2-furyl]methylidene}-4-methylbenzene-1-sulfonohydrazide			3.07239	2.63375e-08	8.41166	1.73983
6.068_221.04873	2-pyridin-4-yl-1,3-thiazole-4-carbohydrazide			1.55474	6.08297e-13	2.93781	1.16617
6.124_374.24369	N-(2-Cyanoethyl)-2-[(3R,4S)-3-ethyl-1-(2-hydroxy-4-methoxybenzyl)-4-piperidinyl]-N-methylacetamide			-1.7712	2.04205e-09	0.292966	1.16976
6.131_393.28594	(2R)-N-[(2S)-1-Amino-3-cyclohexyl-1-oxo-2-propanyl]-1-(cyclohexylcarbonyl)-2-piperazinecarboxamide			4.20521	1.68684e-13	18.4457	1.99547
6.137_337.20094	5-Methoxy-2-[(3S)-1-(1-methyl-4-piperidinyl)-3-pyrrolidinyl]-1H-benzimidazole			1.8008	9.91338e-08	3.48413	1.24967
6.169_413.20711	N1-(1,1,3,3,6-Pentamethyl-7-nitro-2,3-dihydro-1H-inden-5-yl)-2,6-dimethoxybenzamide			-8.69653	4.31405e-19	0.00241038	2.81652
6.176_324.15925	Dimefline			-3.296	1.49309e-09	0.101813	1.62876
6.177_345.07900	N1-Benzyl-2-[(2-oxo-3-piperidyl)carbonyl]hydrazine-1-carbothioamide			5.93683	9.3997e-21	61.2582	2.31473
6.177_380.11616	ethyl 5-(4-chlorophenyl)-2-cyano-5-(1,4-thiazinan-4-yl)-2,4-pentadienoate			6.98515	9.45971e-24	126.689	2.53082
6.18_408.27443	NP-022237			3.58477	4.74135e-13	11.9984	1.89129
6.242_375.15500	(2S)-5,7-dimethoxy-8-(3-methylbut-2-en-1-yl)-2-phenyl-3,4-dihydro-2H-1-benzopyran-4-one			2.95159	4.82406e-12	7.736	1.72706
6.291_406.23363	1-Methyl-4-(5-{5-[(2S)-1-(3-pyridinylmethyl)-2-pyrrolidinyl]-1,2,4-oxadiazol-3-yl}-2-pyridinyl)piperazine			-5.56972	6.29799e-11	0.0210546	2.11857
6.341_458.15968	N-{3-[4-(2-Chloro-6-fluorobenzyl)piperazino]propyl}-3-(trifluoromethyl)benzamide			1.18999	0.000151359	2.28151	1.17545
6.366_355.12170	1-(4-chlorophenethyl)-N-(4-methylphenyl)-5-oxo-3-pyrrolidinecarboxamide			2.14549	6.99694e-07	4.42443	1.20347
6.388_269.11726	6-methoxy-2-[(5-methyl-2-furyl)methylidene]-1,2,3,4-tetrahydronaphthalen-1-one			4.23074	2.45589e-12	18.775	2.05413
6.394_397.21192	4-[2-(5-bromo-2-thienyl)-4-pyrimidinyl]benzamide			-4.87508	1.71852e-15	0.0340766	2.11056
6.402_345.21724	MMB018			3.6233	2.06223e-10	12.3231	2.06625
6.467_394.20715	3-[(4-chlorobenzyl)thio]-4-methyl-5-undecyl-4H-1,2,4-triazole			-5.10573	0.000103873	0.0290416	1.39454
6.501_336.25327	(2Z)-3-methyl-5-(1,2,5,5-tetramethyl-7-oxo-1,2,3,4,4a,5,6,7-octahydronaphthalen-1-yl)pent-2-enoic acid			2.74338	4.5524e-09	6.69639	2.11781
6.544_233.11741	Dihydrokawain			1.35203	1.05219e-06	2.5527	1.04432
6.551_527.13453	2-Cyano-N-[(1R,9S)-6-oxo-11-(phenoxyacetyl)-7,11-diazatricyclo[7.3.1.02,7]trideca-2,4-dien-5-yl]benzenesulfonamide			-2.22451	3.99618e-07	0.213972	1.20904
6.558_416.25431	methyl 4-(3-{cyclohexyl[(cyclohexylamino)carbonyl]amino}-3-oxoprop-1-enyl)-1-methyl-1H-pyrrole-2-carboxylate			-1.89126	2.72255e-06	0.269571	1.09024
6.573_225.10245	1H-indol-3-yl(pyridin-2-yl)methanol			-2.70964	1.14459e-05	0.152869	1.33039
6.625_670.41632	12-benzyl-5,8,21-trimethyl-3-(2-methylpropyl)-6,9-bis(propan-2-yl)-icosahydropyrrolo[1,2-q]1-oxa-4,7,10,13,17-pentaazacyclononadecane-1,4,7,10,13,17-hexone			-6.71609	0.00644699	0.00951166	1.08273
6.628_247.08133	3-Methyl-5-(5-methylisoxazol-3-yl)-4-(5-methyl-1,2,4-oxadiazol-3-yl)isoxazole			-4.36475	2.8928e-07	0.0485377	1.67269
6.643_305.18593	1-[4-(1,3-benzodioxol-5-ylmethyl)piperazino]-2,2-dimethylpropan-1-one			2.74793	2.47584e-11	6.7175	1.47151
6.646_317.06635	NP-018990			-3.2646	6.86673e-14	0.104053	1.7097
6.67_232.13339	2-benzyl-6-hydroxy-2-azabicyclo[2.2.2]octan-3-one			-1.85104	7.68117e-09	0.277193	1.18888
6.756_384.21697	(2R,2'R,4'aS,6'S,7'R,8'aS)-4,6',7'-trihydroxy-2',5',5',8'a-tetramethyl-3,3',4',4'a,5',6,6',7,7',8,8',8'a-dodecahydro-2'H-spiro[furo[2,3-e]isoindole-2,1'-naphthalene]-6-one			-4.32805	9.86004e-13	0.0497881	1.94241
6.794_333.14787	2-[(1-ethyl-1H-1,2,3,4-tetraazol-5-yl)sulfanyl]-1-(4-phenylpiperazino)-1-ethanone			4.70876	1.45164e-19	26.1505	2.06337
6.802_273.10568	2-[4-(2-furylmethylene)-5-oxo-2-phenyl-4,5-dihydro-1H-imidazol-1-yl]acetamide			1.68841	8.39922e-06	3.22302	1.31881
6.808_307.20157	O1-(2,2-dimethylpropanoyl)-2-[4-(tert-butyl)phenoxy]ethanehydroximamide			4.87998	1.05775e-16	29.4456	2.04059
6.871_271.06348	2-(4-chlorophenyl)-1H-indole-3-carbaldehyde oxime			3.25748	1.57559e-05	9.56314	1.38639
6.901_480.24444	NP-015904			-4.53481	0.00304938	0.0431406	1.07997
6.918_354.19101	1-[(2-ethyl-4-methyl-1H-imidazol-5-yl)methyl]-4-[5-(trifluoromethyl)-2-pyridinyl]piperazine			-2.83148	9.47546e-06	0.140489	1.20162
6.974_229.07085	N-(cyclopropylmethyl)-N'-phenylurea			-3.75831	1.51725e-07	0.0738987	1.5828
6.99_383.16010	Diethyl 1-(2-phenyl-2H-chromen-4-yl)hydrazine-1,2-dicarboxylate			6.66972	3.07769e-25	101.809	2.51817
7.082_366.13354	(3R,5S)-5-[3-(3-Fluoro-4-methylphenyl)-1,2,4-oxadiazol-5-yl]-1-(1H-imidazol-2-ylmethyl)-3-pyrrolidinol			-3.02391	0.000251822	0.122946	1.24027
7.158_282.16010	N-(3-methylphenyl)-2-(3-pyridinyl)-1-pyrrolidinecarboxamide			3.07565	1.29009e-06	8.43067	1.33758
7.226_502.28047	(2S)-3-Methyl-2-[(2R,2'R,6'S,7'R,8a'S)-4,6',7'-trihydroxy-2',5',5',8a'-tetramethyl-6-oxo-3',4',4a',5',6,6',7',8,8',8a'-decahydro-2'H-spiro[furo[2,3-E]isoindole-2,1'-naphthalen]-7(3H)-yl]butanoic acid			-1.9326	8.88857e-07	0.261957	1.09955
7.348_813.46250	NP-018079			-1.87652	2.11365e-07	0.272339	1.11381
7.438_463.26953	N-[(1S,2S,8S,8aS)-8-Hydroxy-1,4a-dimethyl-7-{(2S)-1-oxo-1-[(3-pyridinylmethyl)amino]-2-propanyl}decahydro-2-naphthalenyl]-2-pyridinecarboxamide			4.73865	1.00721e-13	26.6978	2.28927
7.476_275.16421	(5xi)-12,13-Dihydroxypodocarpa-8,11,13-trien-7-one			1.94748	2.01891e-05	3.85701	1.15342
7.598_304.22708	4-Methoxy PV9			-2.7746	7.90461e-07	0.146137	1.36659
7.965_362.29006	NP-021781			-2.83146	0.000322449	0.14049	1.06953
7.978_383.14888	5-[(1S,3aR,4S,6aR)-4-(3,4,5-trimethoxyphenyl)-hexahydrofuro[3,4-c]furan-1-yl]-2H-1,3-benzodioxole			5.00173	0.00124942	32.0384	1.20674
7.993_593.33371	NP-012768			3.61339	3.1873e-12	12.2388	1.84711
8.06_447.27466	2-{(3R,4S)-3-[(5-Butyl-1,2-oxazol-3-yl)methyl]-4-piperidinyl}-1-(4-phenyl-1-piperazinyl)ethanone			1.91746	1.10369e-10	3.77759	1.24072
8.109_257.21124	NP-020418			1.48435	7.52748e-08	2.7979	1.10902
8.138_279.11029	(3E)-4-methyl-3-(phenylmethylidene)-2,3,4,5-tetrahydro-1H-1,4-benzodiazepine-2,5-dione			1.59253	9.77553e-12	3.01578	1.17371
8.178_499.37648	3-Acetoxyurs-12-en-23-oic acid			-1.31308	5.42166e-10	0.402461	1.02261
8.235_294.20638	N-[(3S,3aS,8S,9S,9aS,9bS)-3,5a,9-Trimethyl-2-oxododecahydronaphtho[1,2-b]furan-8-yl]acetamide			2.17445	6.9622e-09	4.51414	1.38035
8.552_407.18600	NP-019483			4.73151	0.00303815	26.566	1.12114
8.798_339.19885	4-{[(3S)-3-(5-Fluoro-1H-benzimidazol-2-yl)-1-pyrrolidinyl]methyl}-N,N-dimethylaniline			1.89121	4.92127e-08	3.70945	1.24441
8.973_255.17441	6-(cyclohexylmethylidene)-6,7,8,9-tetrahydro-5H-benzo[a]cyclohepten-5-one			1.9859	1.11615e-07	3.96109	1.19311
9.12_421.16519	NP-016596			4.8013	0.0152049	27.8828	1.00067
9.225_454.29322	NP-008177			3.82313	2.61824e-18	14.1539	1.87912
9.239_369.31109	PDMP			-2.75093	1.93218e-06	0.148555	1.22811
9.266_516.40543	NP-016067			3.24807	1.59794e-05	9.50096	1.30353
9.402_419.20804	20-Dihydro 6alpha-methylprednisone			4.29485	9.95299e-18	19.6281	2.02326
9.566_439.23689	2-[(1S,4S,5S)-4-(Hydroxymethyl)-5-isopropyl-2-methyl-2-cyclohexen-1-yl]-1-[4-(2-methoxyphenyl)-1-piperazinyl]ethanone			2.38095	4.09843e-11	5.20879	1.46985
9.576_333.24239	NP-006817			5.46414	4.65248e-18	44.1438	2.2777
9.674_340.28420	NP-016095			-1.90972	3.13323e-07	0.266144	1.1283
9.777_541.30386	NP-012767			-4.89062	1.03707e-05	0.0337114	1.5647
9.866_382.33142	2-Arachidonyl glycerol ether			-2.44729	4.50181e-07	0.183355	1.23544
9.881_393.29745	2-(tert-butylsulfonyl)-N'-{[(2,4-difluorophenyl)sulfonyl]oxy}ethanimidamide			-2.91142	8.71844e-06	0.132916	1.25094
B100009	L-Kynurenine	C00328	HMDB0000684	1.49526	2.73804e-06	2.81916	1.15299
B100033	Malonic acid	C04025	HMDB0000691	-1.94074	7.36903e-08	0.260484	1.15299
B100104	Sorbitol	C00794	HMDB0000247	-7.80688	0.00145402	0.00446576	1.4299
B100210	Galactitol	C01697	HMDB0000107	-6.04354	0.000662861	0.0151605	1.26357
B100242	Homovanillic acid	C05582	HMDB0000118	-1.44324	2.96258e-09	0.367742	1.04384
B100248	4-Hydroxyproline	C01157	HMDB0000725	-3.38165	1.15046e-08	0.0959452	1.62542
B100320	Ophthalmic acid	C21016	HMDB0005765	2.29592	8.58373e-09	4.91066	1.42397
B100332	Stearic acid	C01530	HMDB0000827	-3.93465	9.58776e-12	0.065396	1.81065
B200101	4-Heptenoic acid		HMDB0033793	1.95907	5.93462e-08	3.88812	1.3873
B200104	N-(3-acetamidopropyl)pyrrolidin-2-one		HMDB0061384	1.45814	5.06153e-08	2.74753	1.06244
B300045	Tyrosylglycine		HMDB0029105	2.17805	5.79669e-09	4.52542	1.50498
B300088	Palmitoylglycine		HMDB0013034	-2.7077	1.18549e-11	0.153074	1.45387
B300096	Curcumin	C10443	HMDB0002269	8.1283	0.00284369	279.81	1.42192
B300240	Glycerophospho-N-palmitoyl ethanolamine			0.861668	8.17625e-05	1.81714	1.25473
B300288	Leucyl-Glutamine		HMDB0028927	2.16974	4.13323e-06	4.49943	1.44949
B300402	Decanoylcarnitine	C03299	HMDB0000651	1.57694	7.3947e-09	2.98336	1.1817
B300407	3-hydroxydecanoyl carnitine		HMDB0061636	1.85829	7.92909e-09	3.62577	1.28908
B300469	PC(14:0/20:5(5Z,8Z,11Z,14Z,17Z))		HMDB0007885	-2.30837	0.000132612	0.201889	1.04678
B300570	phenylacetylthreonine		HMDB0341374	-2.41097	2.65417e-05	0.188029	1.12679
B300587	3-(Cystein-S-yl)acetaminophen		HMDB0240217	5.47549	8.31872e-28	44.4924	2.27737
B300588	N-octanoylglutamine		HMDB0341361	-4.08364	1.42229e-12	0.0589797	1.86359
B300633	3alpha,21-dihydroxy-5beta-pregnane-11,20-dione 21-glucuronide			4.44351	6.73737e-16	21.7585	2.05049
B300661	N-Acetyl-1-methylhistidine		HMDB0240340	4.80912	3.09329e-16	28.0343	2.17121
B300706	Betamethasone	C06848	HMDB0014586	5.10738	0.0158957	34.4728	1.07734
B300771	Malonylcarnitine	C01606	HMDB0002095	3.36594	1.4427e-12	10.3098	1.70203
B300776	(R)C(S)S-Alliin	C08265	HMDB0033592	5.11018	8.22786e-19	34.5396	2.1843
B300807	2-Hydroxycinnamic acid	C01772	HMDB0002641	-2.5439	8.95009e-10	0.171478	1.37828
B300843	Pregabalin		HMDB0014375	1.51013	0.000118215	2.84836	1.25228
M0006	Benzoic acid	C00539	HMDB0001870	-1.94997	1.84886e-05	0.258822	1.03877
M0029	Anserine	C01262	HMDB0000194	-2.6831	8.54494e-05	0.155706	1.05318
M0032	Tiglylcarnitine		HMDB0002366	-1.9287	6.55497e-08	0.262667	1.16563
Reference-1005	10,11-Dihydro-10,11-dihydroxycarbamazepine	C07495		1.7776	2.03567e-10	3.42855	1.2806
Reference-1048	5-Amino-4-chloro-3(2H)-pyridazinone			-2.66667	0.00119444	0.15749	1.10944
Reference-1078	Dimethenamide OXA			1.20853	3.17659e-06	2.31101	1.00167
Reference-1089	Myclobutanil	C18477		-2.20165	9.17495e-06	0.217389	1.20731
Reference-1104	Oseltamivir	C08093	HMDB0014343	2.48052	2.26313e-08	5.58098	1.39862
Reference-1109	Propachlor OXA			2.18693	1.17941e-09	4.55337	1.42103
Reference-1112	Pymetrozine	C18590		2.26875	5.24405e-10	4.81907	1.42782
Reference-1194	Phenacetin	C07591		3.51203	1.63221e-13	11.4084	1.87613
Reference-1330	Porphobilinogen	C00931	HMDB0000245	1.84618	1.45874e-10	3.59548	1.18816
Reference-1369	Olomoucine		HMDB0035233	1.29991	1.01489e-05	2.46214	1.13015
Reference-1510	1-Pyrenol	C14519	HMDB0013139	7.2056	3.46609e-32	147.605	2.60733
Reference-1615	Fenfuram	C18833		-2.92875	0.000180413	0.131329	1.22345
Reference-1658	Naphthaleneacetamide	C18533	HMDB0032710	-2.25672	5.23556e-13	0.209247	1.36277
Reference-167	4-Methylhippuric acid		HMDB0013292	1.87531	5.36207e-14	3.66881	1.26106
Reference-1688	Sulfacetamide	C08051	HMDB0014772	4.05806	1.63109e-16	16.657	1.93501
Reference-1717	1-(3-Dimethylaminopropyl)-3-ethylcarbodiimide			1.79966	4.51913e-06	3.48138	1.09611
Reference-1726	2-Amino-3-methoxybenzoic acid	C05831	HMDB0060374	2.54116	3.69692e-15	5.82056	1.52764
Reference-1858	10-Hydroxycarbazepine	C07493	HMDB0060676	-5.45602	5.46214e-11	0.022781	2.13913
Reference-1864	Acebutolol	C06803	HMDB0015324	2.7176	1.22908e-10	6.57777	1.41207
Reference-1942	Zalcitabine	C07207	HMDB0015078	4.77459	2.71828e-16	27.3713	2.16245
Reference-1964	Carteolol	C06874	HMDB0014662	1.73955	5.68112e-10	3.33931	1.15649
Reference-1979	Cilazapril	D07699	HMDB0015433	-5.06886	2.28678e-08	0.0297935	1.89112
Reference-2046	Tropatepine	D07303		-2.36297	1.47942e-05	0.194391	1.17745
Reference-2091	Triadimefon	C11156		-3.4283	1.60982e-08	0.0928924	1.5072
Reference-2108	Tixocortol pivalate	D06171		-2.21933	0.000658687	0.214741	1.0408
Reference-2146	Flupentixol			5.81902	2.15409e-27	56.4547	2.34939
Reference-2158	Omega-Hydroxynorfentanyl			-2.25461	1.11394e-08	0.209553	1.29866
Reference-2178	Guanfacine	C07037	HMDB0015153	2.7413	6.10402e-09	6.68672	1.73454
Reference-2185	Heptaminol	D07158		-2.82814	6.6202e-14	0.140814	1.55821
Reference-2206	Sulfamethoxypyridazine	D02439		1.20929	2.48223e-05	2.31224	1.08316
Reference-2269	Mebutamate	D01807		-2.6207	1.69341e-06	0.162589	1.26137
Reference-2275	Mefloquine	C07633	HMDB0014502	-4.65192	2.12952e-07	0.039777	1.72671
Reference-2357	Primaquine	C07627	HMDB0015219	3.53693	7.40786e-08	11.6071	1.53545
Reference-2386	Milrinone	C07224	HMDB0014380	3.15697	5.0887e-11	8.91955	1.82094
Reference-2399	N,N-Dimethyltryptamine	C08302	HMDB0005973	-4.37548	0.000203991	0.048178	1.33354
Reference-2406	Pholcodine	D07385	HMDB0041984	-3.97911	0.000118097	0.0634118	1.23926
Reference-2423	Pentylone			-2.80594	7.96599e-06	0.142997	1.25812
Reference-2478	Ouabain	C01443	HMDB0015224	-4.58689	0.000167194	0.0416111	1.34427
Reference-2596	3,3,5,5-Tetramethylpyrroline-N-oxide			1.84403	6.57673e-07	3.59012	1.28698
Reference-2613	DL-5-Methoxytryptophan			-3.82737	1.18457e-12	0.0704446	1.89657
Reference-2634	Aceanthrenequinone			6.50423	5.71278e-18	90.7756	2.5122
Reference-2666	Citroflex 2	D06228	HMDB0034263	-2.63016	6.3589e-08	0.161526	1.42702
Reference-2775	TNP-470			3.97638	6.90023e-10	15.7402	1.69612
Reference-2782	SSR504734			-4.64314	3.23049e-12	0.0400197	2.0422
Reference-2894	4-Cyano-4-(thiobenzoylthio)pentanoic acid			-3.72603	0.000326823	0.0755709	1.15042
Reference-2927	4,4'-Methylenebis(2-methylaniline)	C19260		-3.27985	6.39735e-05	0.10296	1.24138
Reference-2960	Allobarbital	D02817		2.21416	3.82417e-13	4.6401	1.34858
Reference-2973	N-Acetylprocainamide		HMDB0041944	2.1727	7.78943e-07	4.50867	1.58008
Reference-3006	Dicyclomine	C06951	HMDB0014942	2.21029	3.1067e-12	4.62767	1.44192
Reference-3093	Benzenesulfonamide			1.87926	4.74361e-12	3.67887	1.27521
Reference-3135	Benzyl octyl adipate			2.12283	4.0665e-08	4.35549	1.58172
Reference-3176	Dipropyl pyridine-2,5-dicarboxylate			2.80784	1.8513e-12	7.00235	1.61371
Reference-3178	Dimethyldipropylenetriamine			2.84965	1.16136e-07	7.20828	1.57829
Reference-3195	Zenarestat	D03807		-4.44709	1.76442e-06	0.0458451	1.61495
Reference-3258	N-Carbobenzoxy-beta-alanine			2.99849	6.54691e-15	7.99161	1.69992
Reference-3307	Diethyl acetylsuccinate			1.33634	5.70578e-07	2.5251	1.05615
Reference-3455	Tenofovir	C17407	HMDB0014445	4.98398	5.19123e-18	31.6466	2.20865
Reference-3637	4-Aminotetrahydro-2H-thiopyran-4-carboxylic acid			5.67306	6.56791e-16	51.0225	2.23295
Reference-375	D-Alanyl-D-alanine	C00993	HMDB0003459	-1.58957	2.02621e-10	0.332271	1.12029
Reference-3762	N-Cyclohexyl-2-(methylsulfonyl)acetamide			2.93782	2.37935e-08	7.66251	1.49025
Reference-378	Coenzyme Q1		HMDB0002012	2.50335	2.37439e-09	5.67001	1.5349
Reference-3813	Methyl 1-(4-chlorophenyl)-5-(2-methoxy-2-oxoethyl)-1H-1,2,3-triazole-4-carboxylate			4.6856	8.15803e-13	25.7339	1.94097
Reference-393	D-(-)-Glutamine	C00819	HMDB0003423	1.43101	1.43807e-07	2.69636	1.01639
Reference-4042	1,3,4,10-Tetrahydro-9(2H)-acridinone			-2.43788	5.18162e-05	0.184555	1.13928
Reference-4068	Ethyl 4-methyl-2-oxo-6-(1-phenylethyl)-1,2,3,4-tetrahydro-5-pyrimidinecarboxylate			-2.58169	3.03998e-06	0.167045	1.21804
Reference-4261	N-(4,6-Dimethyl-2-pyrimidinyl)-4-[(E)-(2-hydroxybenzylidene)amino]benzenesulfonamide			-1.94981	1.63646e-05	0.25885	1.12065
Reference-4356	1-(2-Furylmethyl)-5-oxopyrrolidine-3-carboxylic acid			-1.94611	3.35451e-11	0.259515	1.2841
Reference-4408	Thromboxane B2	C05963	HMDB0003252	-3.40669	5.29951e-12	0.0942941	1.84177
Reference-4435	CAY10429			-2.65242	9.22704e-09	0.159054	1.42593
Reference-4451	N-(4-cyano-1-phenyl-1H-pyrazol-5-yl)-2-(4-methylpiperazino)acetamide			2.50682	2.08813e-08	5.68366	1.46943
Reference-4495	Ethyl 2,7-dimethylimidazo[1,2-a]pyridine-3-carboxylate			2.12525	1.02379e-14	4.36279	1.36967
Reference-4507	Hexobarbital	C11723	HMDB0015444	2.03299	3.0479e-11	4.09251	1.37787
Reference-4721	5-trans prostaglandin F2beta			-2.20877	2.21082e-08	0.216319	1.26895
Reference-4838	2-Acetylphenyl 4-methylbenzenesulfonate			-2.90936	1.55227e-05	0.133105	1.33501
Reference-4864	R-1 Methanandamide phosphate			-3.93464	2.25254e-06	0.0653968	1.44124
Reference-49	Cyproconazole	C18456		1.15218	7.47061e-05	2.2225	1.02355
Reference-4910	(+/-)-CP 47,497-C7-Hydroxy metabolite			4.27894	1.35336e-12	19.4129	1.85725
Reference-4913	(+/-)-CP 47,497-C8-Homolog			1.29516	9.17075e-06	2.45404	1.09684
Reference-4957	BB-22 3-Carboxyindole metabolite			-3.98449	1.88006e-10	0.0631755	1.791
Reference-4962	JWH 200 4-OH indole			6.01347	7.58062e-20	64.6005	2.33772
Reference-4977	Carbidopa	C06870		1.45805	2.67677e-11	2.74736	1.08746
Reference-509	N-Acetyl-D-penicillamine			6.48485	1.38161e-22	89.5643	2.47104
Reference-5156	3,4-Methylenedioxy-5-methylethcathinone			2.54567	2.57574e-08	5.8388	1.45393
Reference-5277	2-(1,3-Benzodioxol-5-yl)-4,5,6,7-tetramethyl-1H-benzimidazole			1.56094	1.15349e-05	2.95047	1.22468
Reference-53	Carbetamide			-2.08682	7.96206e-08	0.235399	1.2617
Reference-5426	Nitracaine			3.99153	4.08079e-14	15.9063	1.93412
Reference-5538	DOBU			-2.47848	4.49207e-06	0.179434	1.24755
Reference-565	Psychosine			-3.11027	8.97184e-05	0.115802	1.15709
Reference-5668	2-[(3-Cyano-4,6-dimethyl-2-pyridinyl)sulfanyl]-N-(4-cyano-1-phenyl-1H-pyrazol-5-yl)acetamide			-3.24389	1.08921e-07	0.105558	1.47812
Reference-5851	Asiaticoside	C15428	HMDB0036656	-2.36279	1.92228e-11	0.194415	1.37452
Reference-5926	2-(3,5-Dimethyl-1-phenyl-1H-pyrazol-4-yl)-5-methoxybenzoic acid			-1.57564	5.76008e-07	0.335495	1.01596
Reference-6064	AH 8529			-2.76214	1.10146e-07	0.147405	1.48168
Reference-6137	Glycitin	C16195		-2.80021	0.00048641	0.143566	1.09527
Reference-6145	Oleandomycin	C01946		-6.73814	0.00258105	0.00936735	1.20709
Reference-6154	Ergosinine			4.416	3.4364e-16	21.3476	2.03647
Reference-6177	11-Oxoetiocholanolone	C14552	HMDB0006031	5.15502	1.4892e-19	35.6301	2.22542
Reference-6181	Pregnanetriol	C14680		-2.65061	0.000143897	0.159252	1.13598
Reference-6238	Vindoline	C01626		-2.10197	1.23395e-06	0.23294	1.14693
Reference-6242	Astragaloside A			-1.90027	6.10541e-08	0.267893	1.20078
Reference-6245	FG-4592			2.94298	1.04211e-06	7.68996	1.39627
Reference-6274	Allylescaline			-2.01429	3.8002e-08	0.247536	1.32329
Reference-6328	MDA 2-aldoxime analog			1.57522	4.98435e-07	2.97982	1.11693
Reference-6329	MDA 2-amido analog			1.57522	4.98435e-07	2.97982	1.11693
Reference-6599	TOFA			4.09158	7.48492e-09	17.0486	1.69579
Reference-6603	9(Z),11(E),13(E)-Octadecatrienoic Acid methyl ester			-3.31047	2.10472e-12	0.100797	1.63339
Reference-6611	1-(4,6-Dimethoxy-1,3,5-triazin-2-yl)-8-methyl-1,2,3,4-tetrahydroquinoline			1.29615	1.15548e-08	2.45573	1.01857
Reference-6626	GW 9508			-2.13886	9.28087e-08	0.227059	1.23524
Reference-6734	3-Allyl-2-hydroxybenzoic acid			-3.03798	1.12539e-07	0.121752	1.4075
Reference-6780	Ethyl 3-oxo-2,4-diphenylbutanoate			-3.83398	0.00325622	0.0701224	1.18306
Reference-6915	5-Chloro AB-PINACA			-2.82698	6.3964e-10	0.140927	1.61282
Reference-6963	Nalmefene	C08027		-4.35689	6.58218e-12	0.0488027	1.92912
Reference-7026	tert-Butyl N-{[(tert-butoxycarbonyl)amino](methylthio)methylene}carbamate			5.224	9.9909e-18	37.3751	2.16942
Reference-712	Thymidine 5'-monophosphate	C00364	HMDB0001227	-4.5197	3.63533e-16	0.0435947	2.04971
Reference-7274	Diphenyl carbonate	C14507		-3.97792	2.15261e-07	0.063464	1.63256
Reference-7309	Triheptanoin			-3.91626	3.72422e-05	0.0662353	1.24025
Reference-7370	4-Isopropyl-9H-thioxanthen-9-one			1.51024	1.66278e-06	2.84857	1.13743
Reference-7374	Sorbitan monolaurate			-2.2161	1.52818e-11	0.215222	1.34448
Reference-7494	(5E)-4-Methoxy-5-{methoxy[(2R,3S)-3-phenyl-2-oxiranyl]methylene}-2(5H)-furanone			-3.45487	9.68832e-09	0.0911969	1.56031
Reference-7526	(3R,3aR,4R,4aR,7aR,8R,9aR)-3,4a,8-Trimethyl-2,5-dioxo-2,3,3a,4,4a,5,7a,8,9,9a-decahydroazuleno[6,5-b]furan-4-yl acetate			4.52395	8.04188e-13	23.0062	2.39271
Reference-7578	4,8-Dihydroxy-6-methoxy-3-methyl-3,4-dihydro-1H-isochromen-1-one			-2.63542	0.000124852	0.160939	1.06868
Reference-7715	Methyl 4-{[1,3-dihydroxy-1-(4-hydroxy-3-methoxyphenyl)-2-propanyl]oxy}-3-methoxybenzoate			-2.7277	1.02256e-09	0.150967	1.51572
Reference-7771	Piperanine		HMDB0033874	1.96887	1.8201e-05	3.9146	1.23532
Reference-7818	Baliospermin	C09065		3.4731	2.21931e-08	11.1047	1.89571
Reference-7831	1,3-Dihydroxy-1-(7-methoxy-2-oxo-2H-chromen-6-yl)-3-methyl-2-butanyl 3-methylbutanoate			5.32866	8.17329e-13	40.187	2.32151
Reference-7835	(2S,3S)-2-{[(2E)-3-(3,4-Dihydroxyphenyl)-2-propenoyl]oxy}-3,4-dihydroxy-2-methylbutanoic acid			5.64955	4.63406e-06	50.1977	1.6014
Reference-7836	6'-Methoxy-2'-methyl-3',4',6,8-tetrahydro-2'H-spiro[indeno[4,5-d][1,3]dioxole-7,1'-isoquinoline]-7',8-diol 2'-oxide			4.05442	1.9442e-12	16.6151	2.14047
Reference-7928	Visnagin	C09049		-4.52492	4.54412e-06	0.0434373	1.60716
Reference-7930	3-(2,6-Dihydroxy-3,4-dimethylbenzyl)-2,4-dihydroxy-6-methylbenzaldehyde			4.24069	2.71828e-16	18.9049	1.925
Reference-8331	Decyl glycidyl ether			-3.43683	0.00141317	0.0923442	1.04495
Reference-8359	nor-6alpha-螣xycodol		HMDB0061074	3.76943	1.29243e-10	13.6368	1.93516
Reference-8408	Barbital			4.13089	9.14681e-14	17.5196	1.97818
Reference-8413	6alpha-Naloxol			6.25728	2.05231e-19	76.4941	2.44923
Reference-8577	Ethyl 2-{3-[(4-chloro-2-nitrobenzoyl)amino]-4-methylphenoxy}propanoate			7.20853	0.000935078	147.905	1.32924
Reference-8649	6-Amino-3-methyl-1-phenyl-1H-pyrazolo[3,4-b]pyridine-5-carboxamide			2.01848	4.30108e-12	4.05157	1.36991
Reference-8665	3-[3-(2-Thienyl)-1,2,4-oxadiazol-5-yl]propanoic acid			4.52828	3.35595e-33	23.0753	2.06132
Reference-8671	1-[4-Bromo-3-(trifluoromethyl)phenyl]-3-phenylurea			-5.94784	3.36886e-07	0.0162002	1.91204
Reference-8687	9-Chloro-2-hydroxy-5-imino-4-oxo-3,5-dihydro-4H-chromeno[3,4-c]pyridine-1-carbonitrile			-5.5939	9.36082e-12	0.0207046	2.11361
Reference-8695	4-(Prop-2-ynyl)thiomorpholine 1,1-dioxide			6.16216	6.23374e-22	71.6136	2.41098
Reference-8736	Trimethoprim impurity C			1.92962	1.24976e-07	3.80955	1.27829
Reference-8767	n-Pentyl isopentyl phthalate			-3.12743	0.000933385	0.114433	1.08969
Reference-878	Procainamide	C07401	HMDB0015169	1.87308	1.81733e-08	3.66314	1.32573
Reference-8796	2-[8-(4-Chlorophenyl)-6,12-dioxo-3,4,6,11,12,12a-hexahydropyrazino[2,1-c][1,4]benzodiazepin-2(1H)-yl]-2-oxoacetamide			1.84463	5.58094e-09	3.59161	1.22447
Reference-8838	[(3R,4S)-3-[(6-Methoxy-3,4-dihydro-1-isoquinolinyl)methyl]-1-(4-morpholinylcarbonyl)-4-piperidinyl]acetic acid			4.27878	4.70923e-12	19.4107	1.85075
Reference-8846	(1R,9R)-5-Cyclohexyl-6-oxo-N-phenyl-7,11-diazatricyclo[7.3.1.02,7]trideca-2,4-diene-11-carboxamide			-3.34532	5.83858e-19	0.0983914	1.7288
Reference-8890	N-{[(2R,4S,5R)-5-Ethyl-1-azabicyclo[2.2.2]oct-2-yl]methyl}-2-furamide			2.33471	1.36362e-05	5.04448	1.47655
Reference-8894	2-{(3R,4S)-3-Ethyl-1-[(4-methoxyphenyl)sulfonyl]-4-piperidinyl}-N-(4-fluorobenzyl)acetamide			1.82911	2.0453e-08	3.55317	1.37538
Reference-8914	N-(1-Amino-1-oxo-2-propanyl)-1,3,4-trihydroxy-5-{[(4-methylphenyl)carbamoyl]amino}cyclohexanecarboxamide			-2.19157	2.39842e-09	0.218913	1.28288
Reference-8930	{1-[2-({5-[(1-Amino-1-oxo-3-phenyl-2-propanyl)carbamoyl]-2,3,5-trihydroxycyclohexyl}amino)-2-oxoethyl]cyclopentyl}acetic acid			8.13341	5.06779e-36	280.803	2.76957
Reference-8954	1,4:3,6-Dianhydro-2-[(cyclohexylcarbonyl)amino]-2,5-dideoxy-5-{[4-(3-fluorophenyl)-2-pyrimidinyl]amino}-L-iditol			2.06338	4.9825e-07	4.17964	1.44617
Reference-8974	5-O-[(4-Acetylphenyl)carbamoyl]-1,4:3,6-dianhydro-2-deoxy-2-[(ethylcarbamoyl)amino]-D-glucitol			4.25703	1.39645e-12	19.1202	2.21499
Reference-8987	2-[(Allylcarbamoyl)amino]-1,4:3,6-dianhydro-2,5-dideoxy-5-{[4-(4-methoxyphenyl)-2-pyrimidinyl]amino}-L-iditol			-4.90954	1.00296e-16	0.0332722	2.08943
Reference-9046	N-({(2R,4S,5R)-5-[3-(4-Fluorophenyl)-1-methyl-1H-pyrazol-5-yl]-1-azabicyclo[2.2.2]oct-2-yl}methyl)-2-methoxyacetamide			-2.63602	6.75074e-13	0.160871	1.56328
Reference-9064	4-{5-[(3R,4S,6R)-6-(Aminomethyl)-1-azabicyclo[2.2.2]oct-3-yl]-1-methyl-1H-pyrazol-3-yl}-N,N-dimethylaniline			4.64903	2.19238e-23	25.0898	2.09426
Reference-9098	1-(4-Chlorophenyl)-3-{(1S,4S)-4-[1-(2-cyanoethyl)-3,5-dimethyl-1H-pyrazol-4-yl]-2-cyclopenten-1-yl}urea			3.87887	2.84499e-11	14.7115	1.72281
Reference-9114	N-{[(2R,3S,4R,5S)-5-{2-[Benzyl(methyl)amino]-2-oxoethyl}-3,4-dihydroxytetrahydro-2-furanyl]methyl}-4-methylbenzamide			-7.93673	3.46442e-20	0.00408137	2.69375
Reference-9149	N-({(2R,3S,4R,5S)-3,4-Dihydroxy-5-[2-oxo-2-(2-propyn-1-ylamino)ethyl]tetrahydro-2-furanyl}methyl)-4-methylbenzamide			-2.45885	2.48448e-06	0.181891	1.21044
Reference-9152	N-Cyclopropyl-2-[(2S,3R,4S,5R)-3,4-dihydroxy-5-{[(methylsulfonyl)amino]methyl}tetrahydro-2-furanyl]acetamide			5.465	0.00763574	44.1701	1.18609
Reference-92	Simazine	C11172		-2.47509	0.00121309	0.179855	1.01368
0.62_350.88541	LMPR0102030001			1.91831	1.37308e-05	3.7798	1.46855
1.714_507.18411	LMPK12120280			-2.9913	0.000455138	0.125756	1.0079
3.137_361.09257	LMPK12140637			-6.36581	3.41542e-09	0.0121255	2.0777
6.269_403.10233	LMPK12111496			-2.0113	9.81887e-06	0.24805	1.12325
6.488_305.11653	LMPK12110020			5.46267	7.13124e-28	44.0989	2.25074
7.577_425.28984	LMST04010261			3.6509	4.79566e-16	12.5612	1.90308
8.411_387.32165	alpha-N-(3-hydroxyhexadecanoyl) L-ornithine			1.83473	4.98435e-07	3.56705	1.25775
8.428_379.29876	LMST01010295			-3.49509	1.10201e-10	0.0886894	1.71286
8.457_523.30877	16alpha,17alpha-epoxy-sinusta-5-en-3beta鈥搊l-20beta-yl sulfate			-1.5173	6.53702e-10	0.34934	1.0915
8.735_483.31085	LMST04030214			4.06444	7.35628e-07	16.7309	1.58691
8.857_339.25369	FAHFA(8:0/3-O-12:1(5Z))			-4.29342	1.84069e-05	0.0509977	1.34234
8.986_179.17963	7-Ethyl-4E-undecen-6-one			-1.90131	9.28326e-07	0.267699	1.13667
9.019_413.28327	1alpha-fluoro-25-hydroxy-16,17,23,23,24,24-hexadehydrovitamin D3 / 1alpha-fluoro-25-hydroxy-16,17,23,23,24,24-hexadehydrocholecalciferol			2.55587	1.86837e-06	5.88021	1.42513
9.138_509.38453	LMST01031065			2.33011	0.000119933	5.02844	1.05729
9.989_423.27478	LMST04010114			1.17444	2.5069e-05	2.25705	1.10803
C00826	L-Arogenate; L-Arogenic acid; Pretyrosine;	C00826		2.62961	4.77221e-10	6.1886	1.57963
C01067	D-Galactose 6-sulfate;	C01067		-3.06073	0.000115766	0.119847	1.09484
C01593	Limonoate;	C01593		1.18084	0.000127344	2.26709	1.49305
C01795	Columbamine;	C01795		-1.65419	4.8079e-08	0.317716	1.12155
C02080	Stipitatonate;	C02080		-3.23407	2.93769e-12	0.106279	1.64575
C02927	2-Caffeoylisocitrate; (E)-Caffeoylisocitrate;	C02927		-2.56341	5.51565e-06	0.169175	1.26382
C02993	Kyotorphin; L-Tyrosyl-L-arginine;	C02993		1.96249	8.37087e-08	3.89733	1.25799
C03115	Farnesyl triphosphate;	C03115		-3.83324	0.000212425	0.0701585	1.23109
C03142	N-D-Glucosylarylamine;	C03142		1.31365	4.18232e-05	2.4857	1.11434
C03147	N-Malonylanthranilate;	C03147		-2.97279	9.80924e-11	0.12738	1.53937
C03225	3,5-Dinitro-L-tyrosine;	C03225		-2.28767	2.46497e-06	0.204806	1.18646
C03393	4-Phospho-D-erythronate; 4-Phosphoerythronate;	C03393		-2.92322	1.54768e-06	0.131833	1.29363
C03576	Coenzyme M; 2-Mercaptoethanesulfonate; Reduced coenzyme M; HS-CoM; CoM;	C03576		-5.07183	2.62751e-09	0.0297322	1.89988
C03887	Oxidized Cypridina luciferin;	C03887		-2.69652	1.53588e-05	0.154265	1.21519
C03920	2-(Methylthio)ethanesulfonate; Methylcoenzyme M; Methyl-CoM; 2-(Methylsulfanyl)ethane-1-sulfonate;	C03920		2.74608	2.10915e-08	6.70892	1.8539
C04015	N-Acetyl-4-O-acetylneuraminate;	C04015		-2.16016	1.0528e-08	0.223732	1.27987
C04045	3-(3,4-Dihydroxyphenyl)pyruvate; 3,4-Dihydroxyphenylpyruvate;	C04045		-2.00954	1.60709e-05	0.248353	1.0617
C04067	Diethyl 2-methyl-3-oxosuccinate; Diethyl oxalpropionate; Butanedioic acid, 2-methyl-3-oxo-, 1,4-diethyl ester;	C04067		1.50543	5.93683e-08	2.8391	1.15746
C04187	5-Methyldeoxycytidine diphosphate;	C04187		1.64498	3.30429e-06	3.12744	1.37114
C04209	3-(Carboxycarbonylamino)-L-alanine; N3-Oxalyl-L-2,3-diaminopropanoate; L-alpha-Amino-beta-oxalylaminopropionic acid; beta-ODAP;	C04209		2.14707	1.24214e-09	4.42928	1.36711
C04259	N,N-Dimethylhistidine; Nalpha,Nalpha-Dimethyl-L-histidine;	C04259		1.29326	4.59597e-05	2.45082	1.03044
C04421	N-Succinyl-LL-2,6-diaminoheptanedioate; N-Succinyl-LL-2,6-diaminopimelate; N-Succinyl-L-2,6-diaminoheptanedioate; N-Succinyl-L-2,6-diaminopimelate;	C04421		3.89038	9.93592e-11	14.8293	1.95545
C04425	S-Adenosyl-4-methylthio-2-oxobutanoate; S-Adenosyl-4-(methylsulfanyl)-2-oxobutanoate;	C04425		-6.63267	2.99359e-16	0.0100778	2.42611
C04529	(3S,4S)-3-Hydroxytetradecane-1,3,4-tricarboxylate;	C04529		3.21579	1.4066e-15	9.29069	1.66042
C04587	Diethyl (2S,3R)-2-methyl-3-hydroxysuccinate;	C04587		-4.05308	2.64459e-11	0.0602421	1.79816
C05316	Dihydromacarpine; 13,14-Dihydro-5,7-dimethoxy-13-methyl-[1,3]benzodioxolo[5,6-c]-1,3-dioxolo[4,5-i]phenanthridine;	C05316		2.35587	2.56872e-10	5.11903	1.45151
C05399	Melibiitol; 6-O-alpha-D-Galactosyl-D-glucitol;	C05399		-4.71229	0.00130795	0.038147	1.1952
C05552	Biocytin; N6-D-Biotinyl-L-lysine; epsilon-N-Biotinyl-L-lysine;	C05552		2.25957	2.08007e-09	4.78849	1.42125
C05556	delta-(L-2-Aminoadipyl)-L-cysteinyl-D-valine; N-[L-5-Amino-5-carboxypentanoyl]-L-cysteinyl-D-valine; L-delta-(alpha-Aminoadipoyl)-L-cysteinyl-D-valine; ACV;	C05556		6.26337	1.67017e-36	76.8178	2.4365
C05931	N-Succinyl-L-glutamate; (2S)-2-(3-Carboxypropanoylamino)pentanedioic acid;	C05931		-1.89332	1.05794e-05	0.269187	1.03208
C06633	Erythromycin D;	C06633		-7.9515	0.00113753	0.00403979	1.36661
C06733	8'-apo-beta-Carotenol;	C06733		-2.41061	4.51347e-05	0.188076	1.08435
C07319	Sumatriptan;	C07319		1.61591	3.0111e-09	3.06505	1.17805
C08285	10,16-Dihydroxyhexadecanoic acid; Hexadecanoic acid, 10,16-dihydroxy-;	C08285		1.26885	4.53006e-11	2.4097	1.03682
C08331	Gynocardin; 2-Cyclopentene-1-carbonitrile, 1-(beta-D-glucopyranosyloxy)-4,5-dihydroxy-,(1alpha,4alpha,5beta)-;	C08331		-4.40125	1.9263e-06	0.047325	1.52738
C08441	Tentoxin;	C08441		-4.02689	1.82758e-07	0.0613457	1.63177
C08510	Ruscopine;	C08510		-4.2354	1.02708e-08	0.0530905	1.69859
C08520	Candimine;	C08520		3.04722	8.31202e-09	8.26619	1.71356
C08631	Messagenin;	C08631		-1.80176	5.89589e-17	0.286825	1.27474
C08675	Delcorine;	C08675		2.99626	2.91851e-10	7.97928	1.75345
C08803	Cucurbitacin O;	C08803		1.92931	4.03849e-11	3.80874	1.29422
C08807	11-Deoxocucurbitacin I;	C08807		1.93007	5.65768e-10	3.81074	1.25712
C08951	Pseudorhodomyrtoxin; psi-Rhodomyrtoxin;	C08951		3.71576	3.16514e-13	13.1388	1.77251
C09176	Eseridine;	C09176		2.51863	3.47405e-10	5.73037	1.56671
C09242	Tabernamine;	C09242		-1.98302	1.11047e-06	0.25296	1.09851
C09337	Ankorine;	C09337		3.29953	2.5237e-13	9.84595	1.81901
C09438	Fagaronine;	C09438		1.75732	1.68992e-06	3.38071	1.21395
C09548	Scorpioidin;	C09548		2.16947	4.80817e-07	4.49857	1.57431
C09570	Tutin;	C09570		1.24357	1.11625e-13	2.36784	1.04258
C09633	Chamazulene;	C09633		2.67812	4.65168e-10	6.40022	1.43407
C09940	Chaksine;	C09940		0.682549	0.000426235	1.60497	1.16074
C09999	Aralionine A;	C09999		-2.0181	1.39415e-08	0.246883	1.2472
C10311	7-Chloroemodin;	C10311		-2.57903	2.05038e-06	0.167354	1.24158
C10359	Petasitenine;	C10359		5.61007	3.4644e-20	48.8425	2.26288
C10396	Senkirkine;	C10396		6.66772	9.52367e-17	101.668	2.56871
C10525	Rotenonone;	C10525		3.23205	1.52377e-10	9.39601	1.59708
C10564	O-Acetylcypholophine;	C10564		2.14614	3.9396e-08	4.42642	1.24513
C10577	Casimiroedine;	C10577		3.21241	5.09805e-15	9.26901	1.74929
C10689	Graveoline;	C10689		3.15889	5.11729e-19	8.93143	1.73745
C10773	Lupinine;	C10773		1.45185	0.000305949	2.73558	1.23692
C10817	Protoverine;	C10817		4.06107	1.18512e-13	16.6918	1.95851
C10831	Zygadenine;	C10831		-4.03657	6.09949e-12	0.0609358	2.0012
C10913	Cycloxydim;	C10913		4.16625	3.97049e-13	17.9542	2.06471
C10939	Flumetover; N-Ethyl-N-methyl-4-(trifluoromethyl)-2-(3,4-dimethoxyphenyl)benzamide; EMTDB;	C10939		-2.37253	1.69366e-05	0.193106	1.14363
C10956	Oxycarboxin;	C10956		-2.1423	0.000244616	0.226518	1.24656
C11161	Ethidium bromide; Homidium bromide;	C11161		1.21908	2.1675e-05	2.32798	1.00812
C11296	N-Acetyl-leu-leu-leu-tyr-amide; NAc-L3Y-amide;	C11296		-6.5865	3.72071e-05	0.0104056	1.61899
C11298	N-Formyl-norleucyl-leucyl-phenylalanyl-methylester; f-NLP-ME;	C11298		1.5022	3.39887e-05	2.83274	1.21872
C11315	S-(4-Azidophenacyl)glutathione; S-(p-Azidophenacyl)glutathione;	C11315		5.84848	7.80784e-31	57.6195	2.34278
C11328	Leucyl-leucyl-norleucine;	C11328		-3.20527	1.10682e-07	0.108422	1.47758
C11333	N-Acetyl-leucyl-leucine;	C11333		-3.54387	1.09184e-09	0.085741	1.6361
C11622	Tetramethylrosamine;	C11622		-3.54489	5.34966e-14	0.0856806	1.79272
C11784	Echitovenine;	C11784		2.81418	7.29666e-12	7.03319	1.49715
C11800	Thiaburimamide;	C11800		-3.74727	6.11501e-07	0.0744665	1.5758
C11989	8,8a-Deoxyoleandolide;	C11989		1.35309	2.22001e-06	2.55458	1.08949
C11991	L-Olivosyl-oleandolide;	C11991		-4.7539	2.14331e-07	0.0370624	1.72635
C12169	1-Epideacetylbowdensine;	C12169		4.24516	5.25771e-24	18.9636	1.99546
C12188	Vasconine;	C12188		-2.76111	5.23754e-05	0.147511	1.12694
C12220	Myxochelin A;	C12220		3.93211	4.28838e-14	15.2645	1.91123
C12221	Myxochelin B;	C12221		3.62717	1.15143e-09	12.3562	2.18599
C12237	2-O-Acetylpseudolycorine;	C12237		3.53668	3.72615e-13	11.6051	1.82946
C12288	alpha-Amylcinnamaldehyde; alpha-Pentylcinnamaldehyde;	C12288		-4.69615	1.54264e-14	0.0385762	2.12024
C12330	2,3,9,10-Tetrahydroxyberbine;	C12330		-4.82062	5.24799e-13	0.0353873	1.99078
C12600	Phenolsulfonphthalein; Phenol red;	C12600		2.625	2.50961e-09	6.16883	1.51749
C12835	2,5-Dichloro-4-oxohex-2-enedioate;	C12835		-5.55127	0.000962352	0.0213256	1.25579
C13784	TRAM-34; 1-[(2-Chlorophenyl)diphenylmethyl]-1H-pyrazole;	C13784		4.28617	2.39433e-16	19.5104	1.93421
C14276	4-(3,5-Diphenylcyclohexyl)phenol;	C14276		-3.56503	0.000143218	0.0844925	1.20603
C14512	Benzofuran;	C14512		-2.95098	7.4332e-07	0.129321	1.35897
C14799	(1R,2R)-3-[(1,2-Dihydro-2-hydroxy-1-naphthalenyl)thio]-2-oxopropanoic acid;	C14799		1.66059	2.07255e-06	3.16147	1.22316
C14876	S-(2-Hydroxyethyl)-N-acetyl-L-cysteine;	C14876		-1.54412	1.33075e-07	0.342905	1.02366
C14899	3-Dehydro-L-gulonate 6-phosphate;	C14899		-3.60346	0.000200401	0.0822718	1.10611
C14960	1alpha,5alpha-Dimercaptoandrostane-3alpha,17beta-diol;	C14960		-2.66111	2.33822e-11	0.158098	1.57324
C15056	2,2,4-Trimethyl-3-(4-fluorophenyl)-2H-1-benzopyran-7-ol acetate;	C15056		-3.83663	4.74361e-12	0.0699939	1.76137
C15381	6alpha,9-Difluoro-11beta-hydroxypregn-4-ene-3,20-dione; 6alpha,9-Difluoro-11beta-hydroxyprogesterone;	C15381		2.89658	1.41933e-10	7.44658	1.65531
C15556	L-3,4-Dihydroxybutan-2-one 4-phosphate; 1-Deoxy-L-glycero-tetrulose 4-phosphate; 2-Hydroxy-3-oxobutyl phosphate;	C15556		2.21554	1.43412e-09	4.64456	1.45268
C15563	2-Amino-5-formylamino-6-(5-phospho-D-ribosylamino)pyrimidin-4(3H)-one;	C15563		1.58321	1.30154e-05	2.99637	1.16448
C15674	Myxothiazol A;	C15674		2.14306	2.68625e-11	4.41699	1.39122
C15676	HC-toxin;	C15676		-3.66527	7.15012e-07	0.0788212	1.4648
C15719	Coelichelin;	C15719		-4.76238	0.0013492	0.0368453	1.1546
C15842	Lipomycin; alpha-Lipomycin;	C15842		-2.15934	0.000196421	0.223858	1.04319
C16138	L-Pyrrolysine; Pyrrolysine;	C16138		-1.55146	9.14641e-09	0.341164	1.12168
C16352	7-Methylxanthosine;	C16352		1.41044	1.56157e-06	2.65818	1.07644
C16447	Dihydrozeatin riboside;	C16447		5.15385	1.30458e-14	35.601	2.08306
C16448	Dihydrozeatin-O-glucoside;	C16448		-2.85554	1.16357e-06	0.138165	1.32905
C16454	Radon-222;	C16454		-3.55233	2.12469e-06	0.0852397	1.48793
C16506	(10S)-Juvenile hormone III acid diol;	C16506		2.67856	3.92608e-10	6.40217	1.6035
C16692	Mannopine;	C16692		-2.40872	4.58657e-07	0.188323	1.44479
C16696	Dolichotheline;	C16696		2.37217	1.62186e-06	5.17718	1.19038
C16786	AM-toxin I;	C16786		-2.8561	3.156e-09	0.138111	1.45836
C16790	Coronatine;	C16790		3.92038	1.59367e-11	15.1409	2.15528
C16842	SQ 26180;	C16842		1.8886	8.13707e-09	3.70277	1.26856
C16861	13-Deoxytedanolide;	C16861		3.90616	9.5176e-10	14.9924	2.01504
C16874	Makisterone A;	C16874		-4.0675	1.18349e-07	0.0596431	1.63572
C17103	Costatol;	C17103		-4.39799	0.000158806	0.0474321	1.32577
C17126	Neobyakangelicol;	C17126		1.70049	2.69457e-06	3.25011	1.04879
C17218	2-(4'-Methylthio)butylmalic acid; 2-(4'-Methylthio)butylmalate;	C17218		1.34759	4.4585e-10	2.54486	1.057
C17222	2-(5'-Methylthio)pentylmalic acid; 2-(5'-Methylthio)pentylmalate;	C17222		2.10898	9.94409e-07	4.31386	1.17589
C17309	Cilazaprilat; (1S,9S)-9-((S)-1-Carboxy-3-phenylpropylamino)-10-oxo-4,6,7,8,9,10-hexahydro-1H-pyridazino[1,2-a][1,2]diazepine-1-carboxylic acid;	C17309		4.82453	7.85401e-21	28.3354	2.14691
C17359	8-Hydroxyalanylclavam;	C17359		4.9586	7.38352e-17	31.0947	2.20145
C17395	Clavamycin F;	C17395		2.99018	4.63381e-10	7.94576	1.69408
C17434	di-trans,poly-cis-Hexaprenyl diphosphate; ditrans,tricis-Hexaprenyl diphosphate;	C17434		-2.76423	0.00368188	0.147192	1.18868
C17473	Methylophiopogonone A;	C17473		-2.54709	4.6517e-08	0.1711	1.32798
C17515	Capsi-amide; N-(13-Methyltetradecyl)acetamide; CAP-A;	C17515		1.48921	2.66623e-08	2.80735	1.01846
C17546	Akeboside Stf;	C17546		-2.25004	4.3099e-13	0.210219	1.39199
C17575	Actinamine; Spectinamine;	C17575		3.4253	4.26389e-05	10.7428	1.17837
C17698	Salbostatin;	C17698		2.56181	1.05173e-10	5.90449	1.5838
C17783	Capillanol;	C17783		4.65827	4.65576e-19	25.251	2.05625
C18022	Red chlorophyll catabolite;	C18022		-3.01185	5.33518e-05	0.123977	1.14775
C18154	3-Hydroxyethylchlorophyllide a; 3-Devinyl-3-(1-hydroxyethyl)chlorophyllide a;	C18154		-1.26541	5.22429e-10	0.415982	1.00467
C18258	Pyrene-1,8-dione; 1,8-Pyrenequinone;	C18258		3.6919	6.8278e-15	12.9233	1.87046
C18296	5a,11a-Dehydrooxytetracycline;	C18296		-2.31523	1.70224e-06	0.200931	1.15499
C18404	Profenofos;	C18404		1.61271	3.82391e-05	3.05826	1.14505
C18432	Isouron;	C18432		1.78842	1.10688e-08	3.45436	1.25708
C18440	Ethoxysulfuron;	C18440		3.13835	1.18549e-11	8.80516	1.5918
C18521	Flusulfamide;	C18521		1.52565	2.91483e-06	2.87916	1.01181
C18539	Sethoxydim;	C18539		2.4181	1.88571e-17	5.34465	1.48782
C18626	Metalaxyl-M;	C18626		1.75559	6.17903e-05	3.37663	1.01733
C18659	Fenamiphos;	C18659		2.2985	4.64053e-12	4.91945	1.42595
C18671	Dinoterb;	C18671		3.1432	2.88795e-13	8.8348	1.73903
C18709	Decaketide tricyclic intermediate;	C18709		-2.80481	9.15076e-09	0.143109	1.78217
C18929	Drazoxolon;	C18929		1.48922	3.35994e-06	2.80736	1.10426
C18954	Nitrilacarb;	C18954		4.61661	1.93538e-19	24.5322	2.026
C19022	Binapacryl;	C19022		1.3955	8.74582e-11	2.6308	1.08606
C19026	Chloromethiuron;	C19026		3.54008	2.69659e-10	11.6324	2.00958
C19061	Phenisopham;	C19061		2.36869	2.45898e-12	5.16473	1.49723
C19109	Cycluron;	C19109		-1.80548	3.89753e-06	0.286085	1.06178
C19111	Noruron;	C19111		1.59405	2.86607e-07	3.01896	1.19168
C19375	Coronene;	C19375		-2.96991	2.00235e-07	0.127634	1.35481
C19429	HC Blue No. 2; 2,2'-[[4-[(2-Hydroxyethyl)amino]-3-nitrophenyl]imino]bis-ethanol;	C19429		4.66908	3.39899e-13	25.4409	2.11475
C19468	Nithiazide;	C19468		2.73248	1.87326e-08	6.64595	1.77128
C19581	alpha-[3-(Nitrosoamino)propyl]-3-pyridinemethanol;	C19581		2.51259	4.0494e-07	5.70645	1.73788
C19621	9,10,18-Trihydroxystearate;	C19621		-4.2799	4.04547e-13	0.0514781	1.95253
C19622	9,10-Dihydroxystearate;	C19622		3.48218	3.4364e-16	11.1748	1.8197
C19675	(R)-2,3-Dihydroxypropane-1-sulfonate;	C19675		-2.41692	2.42111e-09	0.187255	1.42862
C19686	3-(1-Carboxyvinyloxy)anthranilate; 2-Amino-3-[(1-carboxyethenyl)oxy]benzoate;	C19686		-2.56139	5.31612e-09	0.169412	1.38817
C19704	Dinoflagellate luciferin;	C19704		-2.85119	5.5085e-07	0.138582	1.33987
C19865	Soyasaponin III;	C19865		-2.41079	2.21521e-09	0.188053	1.39118
C20007	Caribenolide I;	C20007		3.78339	2.29917e-12	13.7694	1.72268
C20243	2-Methylisoborneol; 1,2,7,7-Tetramethyl-exo-bicycloheptan-2-ol;	C20243		3.16061	4.74057e-13	8.94205	1.73396
C20291	N-Hydroxy-MeIQx;	C20291		3.26068	1.13295e-11	9.58435	1.80482
C20311	N,N-Dihydroxy-L-isoleucine;	C20311		-2.21878	7.86664e-12	0.214823	1.39709
C20515	Pulcherriminic acid; 2,5-Dihydroxy-3,6-bis(2-methylpropyl)pyrazine bis-N-oxide;	C20515		1.22482	3.04145e-05	2.33726	1.00357
C20533	Lolitrem K;	C20533		-6.71482	1.01469e-06	0.00951999	1.90293
C20772	3-[(1-Carboxyvinyl)oxy]benzoate; 3-[(1-Carboxyethenyl)oxy]benzoic acid;	C20772		2.07318	7.61046e-14	4.20813	1.35044
C20790	7-Deoxyloganetin;	C20790		1.6817	1.65783e-11	3.20806	1.2395
C20798	2-Hydroxy-3-oxopropane-1-sulfonate; 3-Sulfolactaldehyde;	C20798		1.55007	6.1e-12	2.9283	1.14879
C20829	Sulfoquinovose; 6-Deoxy-6-sulfo-D-glucopyranose; 6-Deoxy-6-sulfo-D-glucose;	C20829		2.17417	3.45839e-08	4.51327	1.47342
C20901	5-(Dihydroxymethyl)furan-2-carboxylate;	C20901		-2.76389	1.18188e-05	0.147226	1.25184
C20910	L-4-Hydroxyphenylglycyl-L-arginine; L-pHPg-L-Arg;	C20910		3.05555	8.73765e-12	8.31407	1.74657
C20915	C20915; Tabtoxin biosynthesis intermediate 5;	C20915		-1.70678	2.09995e-06	0.306343	1.02929
C20921	N1-Acetyl-tabtoxinine-beta-lactam;	C20921		-2.11102	2.57691e-05	0.231484	1.05172
C20940	L-Dihydroanticapsin;	C20940		1.75007	1.3727e-10	3.36375	1.27633
C21087	3-[(1R,2S,5R,6S)-5-Hydroxy-7-oxabicyclo[4.1.0]heptan-2-yl]-2-oxopropanoate; Epoxy-4S-H4HPP;	C21087		-2.65295	4.69147e-09	0.158994	1.39908
C21142	3,4-Dihydroxy-2-methy-4-[(2E,6E)-farnesyl]-3,4-dihydroquinoline 1-oxide;	C21142		-4.61386	6.79321e-07	0.0408405	1.57434
C21149	Dibenzothiophene-5-oxide;	C21149		-3.56262	1.98118e-18	0.0846342	1.79015
C21169	N1,N8-Bis(4-coumaroyl)spermidine; N1,N10-Dicoumaroyl spermidine;	C21169		-2.65801	3.05533e-20	0.158438	1.5576
C21307	3,4-Dihydro-7-hydroxy-2-methylene-3-oxo-2H-1,4-benzoxazine-5-carboxylate;	C21307		-3.15615	8.91478e-11	0.112177	1.60432
C21446	17-(4-Hydroxyphenyl)heptadecanoate;	C21446		3.46431	5.07132e-09	11.0373	1.59074
C21577	LY404039; (1R,4S,5S,6S)-4-Amino-2-thiabicyclo[3.1.0]hexane-4,6-dicarboxylic acid 2,2-dioxide;	C21577		1.47779	6.6932e-06	2.78522	1.09492
C21583	6-O-Methyl-N-deacetylisoipecoside aglycon;	C21583		-2.02835	2.40502e-06	0.245136	1.10704
C21671	12-Sulfooxyjasmonate; 12-Hydroxyjasmonate sulfate;	C21671		-8.21366	3.27694e-09	0.00336855	2.4192
C21795	(3E)-4,8-Dimethylnona-1,3,7-triene;	C21795		-1.68937	1.92019e-06	0.310063	1.04229
C22132	(Stearoyl)adenylate;	C22132		-3.22632	6.21585e-05	0.106851	1.21844
HMDB0000206	N6-Acetyl-L-lysine		HMDB0000206	-1.88046	6.9944e-12	0.271597	1.252
HMDB0000241	Protoporphyrin IX		HMDB0000241	-5.83604	0.00137916	0.0175056	1.06721
HMDB0000319	18-Hydroxycorticosterone	C01124	HMDB0000319	2.66169	2.12359e-17	6.32776	1.5795
HMDB0000907	Sulfolithocholic acid		HMDB0000907	4.44644	8.16595e-11	21.8027	2.22635
HMDB0001169	4-Aminophenol		HMDB0001169	1.72859	5.84435e-09	3.31405	1.23344
HMDB0001448	Sulfate		HMDB0001448	-4.52105	9.03229e-19	0.043554	2.07789
HMDB0001934	Nicotine		HMDB0001934	2.3356	5.88749e-07	5.04762	1.54332
HMDB0002089	N-Ribosylhistidine		HMDB0002089	1.6444	4.77902e-08	3.12617	1.10243
HMDB0002271	Imidazolepropionic acid		HMDB0002271	-1.98321	1.36504e-05	0.252926	1.01984
HMDB0002322	Cadaverine		HMDB0002322	2.85595	6.67696e-06	7.23979	1.31683
HMDB0003070	Shikimic acid		HMDB0003070	-2.2618	7.10011e-05	0.208511	1.09608
HMDB0003625	Mercury		HMDB0003625	1.2966	1.71496e-06	2.45648	1.00425
HMDB0004158	Urobilinogen		HMDB0004158	1.02395	0.00197072	2.03347	1.00238
HMDB0004225	2-Oxoarginine		HMDB0004225	1.82994	0.000105113	3.55521	1.07261
HMDB0006317	trans-Hexadec-2-enoyl carnitine		HMDB0006317	-2.36662	4.73446e-05	0.193899	1.08691
HMDB0006319	Alpha-linolenyl carnitine		HMDB0006319	1.64236	6.15217e-13	3.12176	1.19939
HMDB0010320	Cortolone-3-glucuronide		HMDB0010320	-1.39846	2.76194e-10	0.379333	1.09494
HMDB0010328	Tyramine glucuronide		HMDB0010328	-3.03111	3.43971e-08	0.122333	1.45776
HMDB0010388	LysoPC(18:3(9Z,12Z,15Z)/0:0)		HMDB0010388	-2.76281	2.31119e-07	0.147337	1.30602
HMDB0010389	LysoPC(18:4(6Z,9Z,12Z,15Z)/0:0)		HMDB0010389	-4.94925	6.65092e-08	0.0323688	1.70144
HMDB0010397	LysoPC(20:5(5Z,8Z,11Z,14Z,17Z)/0:0)		HMDB0010397	-2.16775	4.80884e-05	0.222558	1.05149
HMDB0010408	LysoPC(P-18:1(9Z)/0:0)		HMDB0010408	-1.77916	5.54386e-08	0.291352	1.11637
HMDB0011152	LysoPE(P-16:0/0:0)		HMDB0011152	2.01693	9.58196e-08	4.04721	1.27038
HMDB0011549	MG(0:0/20:4(8Z,11Z,14Z,17Z)/0:0)		HMDB0011549	6.52372	1.32431e-14	92.0103	2.36508
HMDB0012422	PS(20:3(8Z,11Z,14Z)/18:0)		HMDB0012422	-3.60678	0.000216339	0.0820827	1.10303
HMDB0013166	2-Hydroxymyristoylcarnitine		HMDB0013166	-4.08778	0.000126476	0.0588108	1.2186
HMDB0013200	5-Hydroxytryptophol glucuronide		HMDB0013200	-3.36488	2.78445e-05	0.0970664	1.24374
HMDB0013243	Leucylphenylalanine		HMDB0013243	-3.12981	2.00252e-07	0.114244	1.41035
HMDB0013330	3-Hydroxy-cis-5-tetradecenoylcarnitine		HMDB0013330	-5.22396	5.25626e-05	0.0267566	1.38344
HMDB0013331	3, 5-Tetradecadiencarnitine		HMDB0013331	-2.73688	1.64223e-11	0.150009	1.46629
HMDB0013335	3-Hydroxyhexadecadienoylcarnitine		HMDB0013335	2.33367	7.31399e-10	5.04086	1.5627
HMDB0013631	Oleoyl glycine		HMDB0013631	-1.93147	2.63769e-06	0.262163	1.07137
HMDB0013911	12-Hydroxynevirapine		HMDB0013911	1.67472	8.41695e-08	3.19257	1.1886
HMDB0014025	3-Hydroxychlorpropamide		HMDB0014025	-2.37373	0.000146785	0.192946	1.0656
HMDB0014350	Pyrimethamine		HMDB0014350	3.41686	1.40487e-14	10.6802	1.7318
HMDB0014354	Trospium		HMDB0014354	-2.39258	4.85875e-07	0.190442	1.31594
HMDB0014357	Remikiren		HMDB0014357	-2.77586	0.00092237	0.14601	1.33007
HMDB0014371	Guanadrel		HMDB0014371	2.66665	1.94728e-10	6.34952	1.61998
HMDB0014383	Nevirapine		HMDB0014383	1.56739	2.10757e-06	2.96368	1.11658
HMDB0014404	Sulfanilamide		HMDB0014404	5.07842	3.22659e-22	33.7875	2.20701
HMDB0014493	Clobazam		HMDB0014493	-2.53036	0.000144375	0.173095	1.11778
HMDB0014515	Meprobamate		HMDB0014515	-2.45202	2.3909e-09	0.182755	1.33413
HMDB0014570	Famciclovir		HMDB0014570	1.31584	3.70491e-05	2.48947	1.03424
HMDB0014674	Chlormerodrin		HMDB0014674	-2.95502	5.45908e-05	0.128958	1.15519
HMDB0014727	Lisuride		HMDB0014727	7.39737	5.27876e-19	168.589	2.58267
HMDB0014766	Clorazepate		HMDB0014766	1.2076	1.70322e-05	2.30952	1.0784
HMDB0014817	Thioridazine		HMDB0014817	-4.09906	0.00024716	0.0583527	1.32077
HMDB0014861	Methoxamine		HMDB0014861	2.49819	2.09589e-08	5.64978	1.38968
HMDB0014886	Carbinoxamine		HMDB0014886	-2.52167	1.48434e-05	0.174142	1.17588
HMDB0014904	Clavulanate		HMDB0014904	-1.8444	1.08556e-07	0.278471	1.14917
HMDB0014924	Marimastat		HMDB0014924	-3.07615	3.7751e-07	0.118573	1.39897
HMDB0015045	Zonisamide		HMDB0015045	2.99796	1.25366e-11	7.98868	1.65068
HMDB0015095	Pindolol		HMDB0015095	1.95384	6.80806e-12	3.87404	1.30581
HMDB0015126	Oxaprozin		HMDB0015126	1.70066	2.0026e-09	3.2505	1.2309
HMDB0015133	Frovatriptan		HMDB0015133	2.56925	0.000112584	5.93502	1.03303
HMDB0015164	Topotecan		HMDB0015164	1.79298	1.57672e-07	3.4653	1.09462
HMDB0015166	Probenecid		HMDB0015166	1.58625	8.75779e-08	3.00268	1.1675
HMDB0015235	Quinacrine		HMDB0015235	0.924478	0.000475377	1.898	1.06954
HMDB0015297	Cilostazol		HMDB0015297	4.70941	3.95733e-19	26.1621	2.06448
HMDB0015453	Procaterol		HMDB0015453	2.54664	2.70685e-09	5.8427	1.57739
HMDB0015494	Alizapride		HMDB0015494	1.92242	2.01585e-12	3.79058	1.31409
HMDB0015570	Fusidic Acid		HMDB0015570	1.9869	3.23936e-08	3.96383	1.24271
HMDB0015600	Bepotastine		HMDB0015600	3.56073	3.52017e-17	11.8001	1.79069
HMDB0015673	Carglumic acid		HMDB0015673	-2.77844	0.0006365	0.145749	1.0073
HMDB0030564	trans-Piceid		HMDB0030564	-2.26575	0.000109901	0.207941	1.0119
HMDB0031233	Ethyl hydrogen sulfate		HMDB0031233	-2.54596	9.56068e-10	0.171234	1.47642
HMDB0033193	Avenanthramide L		HMDB0033193	2.33896	5.52728e-10	5.05939	1.58975
HMDB0034879	1-[(5-Amino-5-carboxypentyl)amino]-1-deoxyfructose		HMDB0034879	-3.55992	1.14996e-08	0.0847924	1.60741
HMDB0039329	Soyasapogenol B 3-O-b-D-glucuronide		HMDB0039329	-2.36612	3.53682e-09	0.193967	1.32784
HMDB0041783	trans-Resveratrol 4'-O-glucuronide		HMDB0041783	-4.43357	0.00126295	0.0462768	1.14006
HMDB0060014	Phenol glucuronide		HMDB0060014	-2.95907	1.49036e-08	0.128597	1.45364
HMDB0060120	10-Hydroxy-octadec-12Z-enoate-9-beta-D-glucuronide		HMDB0060120	-6.66666	1.92528e-05	0.00984318	1.6784
HMDB0060550	6-Hydroxyketamine		HMDB0060550	2.13703	9.01782e-08	4.39856	1.77021
HMDB0060558	Desglymidodrine		HMDB0060558	1.23711	3.00385e-07	2.35725	1.04064
HMDB0060570	Deoxydihydro-artemisinin		HMDB0060570	1.93803	6.20976e-13	3.83181	1.33743
HMDB0060599	Lamivudine sulfoxide		HMDB0060599	5.07713	1.87462e-18	33.7574	2.1256
HMDB0060614	Sulindac sulfide		HMDB0060614	2.68187	9.17424e-06	6.41687	1.19828
HMDB0060623	Perindopril Acyl-beta-D-glucuronide		HMDB0060623	-3.98609	8.00238e-07	0.0631056	1.76335
HMDB0060661	APC		HMDB0060661	1.64029	2.85864e-05	3.11728	1.09785
HMDB0060670	2-Hydroxyfelbamate		HMDB0060670	-2.26615	6.09775e-07	0.207884	1.21164
HMDB0060737	3-(4-Hydroxy-3-methoxyphenyl)-2-methylpropionic acid		HMDB0060737	-2.47952	8.21302e-05	0.179304	1.1457
HMDB0060751	3'-Amino-3'-deoxythimidine glucuronide		HMDB0060751	4.17251	1.44109e-17	18.0323	1.91565
HMDB0060826	Hydroxynalidixic acid		HMDB0060826	3.65332	1.01919e-12	12.5822	1.89273
HMDB0060834	N-Acetylserotonin sulfate		HMDB0060834	2.8124	7.45036e-12	7.02453	1.59689
HMDB0060886	6-Hydroxy-R-phenprocoumon		HMDB0060886	5.98182	1.45287e-15	63.1984	2.27483
HMDB0060888	7-Hydroxy-R-phenprocoumon		HMDB0060888	6.45975	1.49078e-15	88.0192	2.37737
HMDB0060990	8-Hydroxycarteolol		HMDB0060990	3.82882	4.2438e-12	14.2099	1.94789
HMDB0061005	repaglinide aromatic amine		HMDB0061005	-7.39682	1.30092e-06	0.00593383	1.9648
HMDB0061013	desmethylastemizole		HMDB0061013	1.49784	1.22724e-05	2.8242	1.28101
HMDB0061024	mono-isopropyl-disopyramide		HMDB0061024	2.01764	2.4051e-07	4.04921	1.52844
HMDB0061060	4'-hydroxytrazodone		HMDB0061060	2.48627	3.29265e-09	5.60326	1.53291
HMDB0061067	arabinofuranosylguanine		HMDB0061067	1.97717	2.6762e-09	3.9372	1.37632
HMDB0061078	beta-oxycodol		HMDB0061078	4.00928	1.42911e-14	16.1033	1.82817
HMDB0061122	4-Hydroxy-alprenolol		HMDB0061122	2.99446	4.25382e-11	7.96935	1.73484
HMDB0155722	O-Sulfotyrosine		HMDB0155722	-2.78936	1.5829e-06	0.14465	1.27028
HMDB0240369	2-Acetylaminophenoxazin-3-one		HMDB0240369	4.62489	1.38524e-30	24.6735	2.08945
HMDB0240380	HHPAA sulfate		HMDB0240380	-3.34572	5.70097e-11	0.0983646	1.615
HMDB0240449	3,5-Dihydroxycinnamic acid sulfate		HMDB0240449	2.94827	5.93103e-08	7.71823	1.97292
HMDB0240563	Tyrosol glucuronide		HMDB0240563	-3.46387	2.99006e-05	0.09063	1.26968
HMDB0240693	2-(3,5-Dihydroxyphenyl)ethanol sulfate		HMDB0240693	1.54005	2.40655e-12	2.90804	1.16359
HMDB0240706	Ethylparaben sufate		HMDB0240706	2.74712	1.41896e-08	6.71376	1.76544
HMDB0240718	Propylparaben sulfate		HMDB0240718	3.01219	3.94253e-08	8.06787	1.96044
HMDB0240724	Suberoyl-L-carnitine		HMDB0240724	3.93384	2.10255e-11	15.2828	2.16704
HMDB0240726	Sebacoyl-L-carnitine		HMDB0240726	-2.12457	1.3402e-10	0.229319	1.2881
HMDB0242204	(-)-Bremazocine		HMDB0242204	3.33495	5.64461e-19	10.0906	1.78101
HMDB0242228	((2R,3S)-3-Amino-2-hydroxy-2-(1H-imidazol-4-ylmethyl)-5-methyl)-5-methylhexanoic Acid		HMDB0242228	2.17229	3.96021e-13	4.50738	1.3794
HMDB0242234	(+-)-(4Ar*,10R*,10aS*)-8-Chloro-1,2,3,4,10,10a-hexahydro-2-methyl-4a,10-(iminoethano)-4aH-(1)benzopyrano(3,2-c)pyridin-12-one		HMDB0242234	-1.6937	1.98305e-10	0.309132	1.17438
HMDB0242259	(+)-Praeruptorin A		HMDB0242259	-2.0453	0.000198088	0.242272	1.25826
HMDB0242309	(1E,4E)-1,5-Bis(4-hydroxy-3-methoxyphenyl)penta-1,4-dien-3-one		HMDB0242309	-5.60003	1.8063e-14	0.0206169	2.21029
HMDB0242353	(1R)-1-Amino-2-sulfanylethanesulfinic acid		HMDB0242353	-5.03868	2.36946e-12	0.0304232	2.01113
HMDB0242427	(1S,2R,3R,4R,5R,6S,7S,8R,9R,10R,13R,14R,16S,17S,18R)-6,16,18-Trimethoxy-13-(methoxymethyl)-11-methyl-11-azahexacyclo[7.7.2.12,5.01,10.03,8.013,17]nonadecane-4,5,7,8,14-pentol		HMDB0242427	2.84563	2.98919e-05	7.18822	1.17156
HMDB0242457	(2-(2',6'-Dimethoxy)phenoxyethylamino)methylbenzo-1,4-dioxane		HMDB0242457	3.91234	2.30626e-10	15.0568	2.22891
HMDB0242466	(2-Chlorophenyl)methyldiazene		HMDB0242466	-4.64316	7.52759e-12	0.0400192	2.04265
HMDB0242470	(2-Hydroxy-3-phosphonooxypropyl) octadec-9-enoate		HMDB0242470	3.79099	4.91688e-12	13.8421	1.77991
HMDB0242572	(2R,3R,4R,5S)-2-(Hydroxymethyl)-1-nonylpiperidine-3,4,5-triol		HMDB0242572	1.70364	4.0572e-07	3.25721	1.20408
HMDB0242583	(2R,4S)-Pyrrolidine-2,4-dicarboxylic acid		HMDB0242583	-3.0096	4.65124e-12	0.124171	1.56111
HMDB0242584	(2R,4S)-1-Tert-Butyl 2-methyl 4-aminopyrrolidine-1,2-dicarboxylate		HMDB0242584	1.36551	2.50121e-05	2.57667	1.22268
HMDB0242640	(2R,3R,4S,5R,6R)-2-[(E)-2-Amino-3-hydroxy-octadec-4-enoxy]-6-(hydroxymethyl)tetrahydropyran-3,4,5-triol		HMDB0242640	-4.42051	3.0105e-07	0.0466974	1.58116
HMDB0242690	Ptaquiloside		HMDB0242690	1.11809	0.00238075	2.1706	1.02819
HMDB0242715	(2R,3S,5R)-2-[6-[[(1S,2S)-2-Hydroxycyclopentyl]amino]-9-purinyl]-5-(hydroxymethyl)oxolane-3,4-diol		HMDB0242715	4.07518	7.40163e-08	16.8559	1.62533
HMDB0242720	Globulin G		HMDB0242720	-3.65094	9.45178e-05	0.0796083	1.25058
HMDB0242721	AB-MECA		HMDB0242721	-3.16557	6.42079e-11	0.111447	1.55465
HMDB0242759	(2R,3S,4R,5R,8R,9S,10R,11R)-5-Amino-1,2,3,4,8,9,10,11-octahydroxydodecane-6,7-dione		HMDB0242759	-1.85894	0.000304942	0.275679	1.09752
HMDB0243489	4-Piperidinol, 1-hydroxy-2,2,6,6-tetramethyl-		HMDB0243489	5.70283	6.21318e-30	52.0862	2.32159
HMDB0243523	(-)-Slaframine		HMDB0243523	1.75199	6.63699e-06	3.36824	1.32656
HMDB0243545	Posiphen		HMDB0243545	2.91061	1.0844e-09	7.51936	1.74333
HMDB0243562	Bicyclo[7.2.0]undec-4-ene, 4,11,11-trimethyl-8-methylene-, (1R,4E,9S)-		HMDB0243562	-2.52704	1.69965e-11	0.173494	1.39451
HMDB0243629	2,2'-Anhydrocytidine		HMDB0243629	5.53725	4.15087e-23	46.4386	2.25403
HMDB0243667	(R)-7-Hydroxywarfarin		HMDB0243667	3.12648	2.3673e-10	8.73299	1.74473
HMDB0243780	1-(2-Hydroxyethyl)-2-(hydroxymethyl)piperidine-3,4,5-triol		HMDB0243780	1.96924	1.50982e-06	3.91562	1.35635
HMDB0243786	1-(3-Carboxypropylcarbamoyl)-5-fluorouracil		HMDB0243786	2.65544	1.36066e-15	6.30038	1.57953
HMDB0243807	1-[3,4-Dihydroxy-5-(hydroxymethyl)oxolan-2-yl]-4-hydroxyhydropyridin-2-one		HMDB0243807	1.52033	2.75233e-05	2.86857	1.16073
HMDB0243831	1-(1,3-Benzodioxol-5-ylcarbonyl)piperidine		HMDB0243831	-4.28133	1.12023e-05	0.0514272	1.53657
HMDB0243864	(3S,4R,5R)-1,3,4,5,6-Pentahydroxy-1-morpholin-4-ylhexan-2-one		HMDB0243864	-2.84788	1.79674e-05	0.1389	1.173
HMDB0243866	1-Dodecanesulfonic acid, 1-hydroxy-3-oxo-		HMDB0243866	-2.35174	1.13896e-06	0.19591	1.30253
HMDB0243883	1-Heneicosanoyl-glycero-3-phosphoserine		HMDB0243883	-3.1162	1.46056e-07	0.115327	1.36685
HMDB0243890	1-O-Hexadecyl-sn-glycero-3-phosphocholine		HMDB0243890	-2.50679	6.18836e-09	0.175947	1.32282
HMDB0243960	1-Naphthyl isocyanate		HMDB0243960	-3.04164	4.47765e-06	0.121443	1.30936
HMDB0243963	1-Naphthyl sulfate		HMDB0243963	-3.6788	6.06281e-07	0.0780856	1.54877
HMDB0243972	1-Nonadecanoyl-glycero-3-phosphoserine		HMDB0243972	-4.55457	3.42204e-08	0.0425539	1.68871
HMDB0243990	1-Phenyl-1-cyclohexene		HMDB0243990	-4.23744	1.85981e-15	0.0530154	1.94899
HMDB0244007	1-Pyrenemethanol		HMDB0244007	7.17229	5.23321e-20	144.237	2.62477
HMDB0244010	1-Sulfooxymethylpyrene		HMDB0244010	-5.20926	0.000669205	0.0270306	1.24416
HMDB0244017	1-Vinylimidazole		HMDB0244017	-1.98321	1.36504e-05	0.252926	1.01984
HMDB0244024	Hexadecane, 1,1-dimethoxy-		HMDB0244024	-5.18686	1.46639e-15	0.0274537	2.16982
HMDB0244123	1,2,3,4-Tetrahydroquinoxaline		HMDB0244123	1.78634	7.89617e-13	3.44938	1.233
HMDB0244212	1,4-Dihydroxy-2-naphthoic acid		HMDB0244212	2.35236	6.84691e-09	5.10658	1.61486
HMDB0244254	1,9-Decadiene		HMDB0244254	-2.85123	1.39012e-09	0.138578	1.51
HMDB0244261	1'-Hydroxybufuralol		HMDB0244261	-2.10828	1.91968e-07	0.231924	1.18373
HMDB0244275	10-Propargyl-5,8-dideazafolic acid		HMDB0244275	-5.0933	8.75701e-12	0.0292929	2.05303
HMDB0244416	2-[(Z)-[(4Z)-4-(Diaminomethylidenehydrazinylidene)hexan-3-ylidene]amino]guanidine		HMDB0244416	5.1187	4.07678e-08	34.7443	1.91774
HMDB0244433	Vorozole		HMDB0244433	-3.88967	2.58241e-05	0.0674671	1.38328
HMDB0244457	2,2'-Dithiobisbenzothiazole		HMDB0244457	1.36668	0.000180097	2.57877	1.06665
HMDB0244548	Z-Leu-Leu-Norvalinal		HMDB0244548	2.97061	2.3254e-11	7.83868	1.6596
HMDB0244568	4-(2-((7-Amino-2-(furan-2-yl)-[1,2,4]triazolo[1,5-a][1,3,5]triazin-5-yl)amino)ethyl)phenol		HMDB0244568	2.17588	1.1178e-07	4.51862	1.4577
HMDB0244626	Desmethyl rizatriptan		HMDB0244626	1.5	1.22768e-06	2.82843	1.13943
HMDB0244641	7-Hydroxy-5-methoxy-4-methyl-3-(4-methylpiperazin-1-yl)-2H-chromen-2-one		HMDB0244641	1.19226	9.45446e-07	2.2851	1.01232
HMDB0244771	Pregnan-20-one, 3,17-dihydroxy-, (3alpha)-		HMDB0244771	2.01694	3.51782e-13	4.04724	1.34279
HMDB0244830	19-Epischolaricine		HMDB0244830	-4.52216	2.25417e-06	0.0435206	1.61889
HMDB0244842	Ergosta-4,6,8(14),22-tetraen-3-one		HMDB0244842	3.33785	1.42606e-15	10.1109	1.76156
HMDB0244932	2-(4-Hydroxyphenylazo)benzoic acid		HMDB0244932	4.9889	5.22766e-27	31.7547	2.15695
HMDB0245057	2-Chloro-DG		HMDB0245057	2.35267	4.83805e-08	5.1077	1.61603
HMDB0245245	2-n-Propylthiazolidine-4-carboxylic acid		HMDB0245245	6.82158	8.19486e-20	113.11	2.54263
HMDB0245307	2-Propylthiazolo[4,5-c]quinolin-4-amine		HMDB0245307	-3.17457	2.0816e-08	0.110754	1.48249
HMDB0245380	2,3-Bis(3-hydroxybenzyl)butane-1,4-diol		HMDB0245380	2.17414	2.62722e-08	4.51318	1.35495
HMDB0245388	2,3-Dimercapto-1-propanol tributyrate		HMDB0245388	4.87916	3.12466e-18	29.4288	2.05745
HMDB0245396	2,3-Dihydroxypropyl dodecanoate		HMDB0245396	2.57167	9.31125e-13	5.94497	1.51552
HMDB0245416	2,3-Epoxyphylloquinone		HMDB0245416	-1.66267	1.22764e-16	0.315855	1.22236
HMDB0245527	2,9-Dimethyl-4,7-diphenyl-1,10-phenanthroline		HMDB0245527	-2.99334	1.53787e-06	0.125578	1.32901
HMDB0245537	2'-Fluoro-2',3'-dideoxyinosine		HMDB0245537	-3.07869	1.41131e-07	0.118365	1.38719
HMDB0245543	2',3'-Dideoxy-3'-fluorouridine		HMDB0245543	1.85593	9.45798e-06	3.61985	1.0228
HMDB0245553	2',4'-Dihydroxy-6'-methoxy-3'-methylchalcone		HMDB0245553	1.47634	0.000239236	2.78242	1.12174
HMDB0245562	20-Epi-Eldecalcitol		HMDB0245562	-1.4742	2.93923e-10	0.359934	1.08764
HMDB0245570	20,26-Dihydroxyecdysone		HMDB0245570	-3.49365	2.08333e-07	0.0887783	1.52626
HMDB0245586	Benzenebutanoic acid, alpha-(acetylamino)-2-amino-gamma-oxo-		HMDB0245586	1.0392	5.63979e-06	2.05509	1.04279
HMDB0245634	6-Amino-9-benzyl-2-(2-methoxyethoxy)-9H-purin-8-ol		HMDB0245634	2.36722	5.11841e-14	5.15947	1.47187
HMDB0245673	beta,beta-Dimethylacrylshikonin		HMDB0245673	-3.73952	5.54507e-09	0.0748675	1.66372
HMDB0245728	5-Amino-2-(3,4-dimethoxyphenyl)-2-isopropylvaleronitrile		HMDB0245728	2.75674	7.37482e-05	6.75867	1.19285
HMDB0245733	2-Isopropyl-6-methyl-4-pyrimidone		HMDB0245733	2.36427	3.76762e-11	5.14891	1.35751
HMDB0245757	9-Octadecenoic acid (9Z)-, (2-hydroxy-2-oxido-1,2-oxaphospholan-4-yl)methyl ester		HMDB0245757	1.18762	1.98376e-05	2.27777	1.05843
HMDB0245773	3-(2-Hydroxyethyl)histidine		HMDB0245773	2.41792	1.64092e-10	5.34401	1.42605
HMDB0245780	3-(4-Carboxybenzylidene)camphor		HMDB0245780	2.07398	5.14712e-07	4.21047	1.33646
HMDB0245794	3-[3-Fluoro-4-[6-(2-methyl-2H-tetrazol-5-YL)-3-pyridinyl]phenyl]-5-(hydroxymethyl)-2-oxazolidinone		HMDB0245794	1.62949	5.47377e-06	3.09404	1.15345
HMDB0245807	3-Amino-4-methoxybenzanilide		HMDB0245807	1.6888	1.26607e-05	3.22388	1.13945
HMDB0245842	3-Chlorophenylhydrazone		HMDB0245842	-3.17017	1.21631e-09	0.111092	1.9814
HMDB0245885	3-Hydroxy-3-methylglutarylcarnitine		HMDB0245885	-3.25562	9.34529e-07	0.104703	1.41284
HMDB0245937	3-Methylthymidine		HMDB0245937	2.75566	4.42119e-10	6.7536	1.64697
HMDB0245946	3-Nitrobenzaldoxime		HMDB0245946	-2.90032	0.000198252	0.133942	1.0621
HMDB0246111	3',4'-Dimethoxyflavone		HMDB0246111	2.89831	4.23169e-08	7.45554	1.38983
HMDB0246112	3',4',5'-Trimethoxyflavonol		HMDB0246112	3.07453	2.22393e-08	8.42414	1.72106
HMDB0246117	2-((2'-(5-Ethyl-3,4-diphenyl-1H-pyrazol-1-yl)-[1,1'-biphenyl]-3-yl)oxy)acetic acid		HMDB0246117	4.4573	2.76969e-25	21.9676	2.02574
HMDB0246171	N-(3-Chloro-4-morpholinophenyl)-N'-hydroxyformimidamide		HMDB0246171	-6.65628	1.45617e-11	0.00991423	2.25687
HMDB0246188	2-[(3,17-Dihydroxy-13-methyl-8,9,11,12,14,15,16,17-octahydro-7H-cyclopenta[a]phenanthren-6-ylidene)amino]oxyacetic acid		HMDB0246188	2.92421	6.30382e-13	7.59057	1.653
HMDB0246227	Ethanone, 1-(4-butylphenyl)-		HMDB0246227	-4.23744	1.85981e-15	0.0530154	1.94899
HMDB0246231	N-(3-(Dimethylamino)propyl)acrylamide		HMDB0246231	1.61438	3.57561e-08	3.06181	1.12209
HMDB0246295	4-(7H-Purin-6-ylsulfanyl)but-3-en-2-one		HMDB0246295	1.29355	2.71541e-06	2.4513	1.03833
HMDB0246312	4-(Phenylamino)benzoic acid		HMDB0246312	2.19242	6.79436e-09	4.57073	1.23832
HMDB0246316	4-[(2,4-Dihydroxy-3,3-dimethylbutanoyl)amino]butanoic acid		HMDB0246316	-2.47569	3.79483e-11	0.179781	1.39389
HMDB0246320	4-[[4-Amino-6-(2,4,6-trimethylanilino)-1,3,5-triazin-2-yl]amino]benzonitrile		HMDB0246320	1.32229	1.5693e-06	2.50062	1.05313
HMDB0246345	4-Amino-3-hydroxyphenylalanine		HMDB0246345	3.58338	4.55349e-14	11.9868	1.78832
HMDB0246421	4-Fluoro-3-phenoxybenzoic acid		HMDB0246421	1.94509	9.60283e-07	3.85061	1.30926
HMDB0246444	4-Hydroxy-3-nitrophenyl acetate		HMDB0246444	3.73791	2.00467e-10	13.3421	2.07927
HMDB0246480	All-trans 4-Keto Retinoic Acid		HMDB0246480	1.89221	3.20352e-10	3.71203	1.26478
HMDB0246499	4-Methyl-1-pentene		HMDB0246499	-3.33815	6.76637e-15	0.0988821	1.69517
HMDB0246518	4-Methylstyrene		HMDB0246518	-3.47041	1.68992e-06	0.0902196	1.33363
HMDB0246531	4-Nitrobenzaldehyde		HMDB0246531	2.27394	1.81629e-09	4.83643	1.4566
HMDB0246637	4'-Thiothymidine		HMDB0246637	3.94573	1.27198e-12	15.4093	1.89054
HMDB0246658	3-(Methylsulfonyl)-2-oxoimidazolidine-1-carbonyl chloride		HMDB0246658	4.81078	2.01864e-07	28.0666	1.84764
HMDB0246668	1-(1-Naphthyl)ethylamine		HMDB0246668	2.25784	9.45618e-06	4.78275	1.33731
HMDB0246678	2-(N-Morpholino)-ethanesulfonic acid		HMDB0246678	-2.19557	1.33746e-07	0.218307	1.32408
HMDB0246717	5-(2-Aminopropyl)indole		HMDB0246717	-2.67135	1.88698e-11	0.15698	1.52069
HMDB0246724	5-(Acetoxymethyl)-2-methyl-5,6,7,7a-tetrahydro-3ah-pyrano[3,2-d]oxazole-6,7-diyl diacetate		HMDB0246724	-4.8865	0.00173526	0.0338077	1.19571
HMDB0246737	5-(Tetrahydro-2H-pyran-4-yl)-1H-indole		HMDB0246737	2.45976	2.01864e-07	5.50125	1.65472
HMDB0246740	5-[(Azetidin-2-yl)methoxy]-2-chloropyridine		HMDB0246740	-3.01635	1.47214e-08	0.123591	1.54759
HMDB0246759	5-Butyl-5-cycloheptenylbarbituric acid		HMDB0246759	2.71838	4.6267e-09	6.58135	1.53209
HMDB0246810	5-Hydroxyprimaquine		HMDB0246810	-3.23633	3.21308e-05	0.106113	1.26421
HMDB0246830	4,4-Dimethyl-2-[3-carboxylatopropyl]-2-tridecyloxazolidine 3-oxide		HMDB0246830	1.67256	4.99749e-10	3.1878	1.18246
HMDB0246836	5-Oxozaleplon		HMDB0246836	-3.75209	3.92149e-06	0.074218	1.4607
HMDB0246852	5,5-Diphenylbarbituric acid		HMDB0246852	4.86596	8.248e-13	29.1607	2.00671
HMDB0246859	5,6-Dihydro-1,10-phenanthroline		HMDB0246859	6.06287	1.15476e-13	66.8505	2.45128
HMDB0246874	5beta-Pregnane-3alpha,20alpha-diol		HMDB0246874	-4.13411	3.29133e-07	0.056952	1.53596
HMDB0246883	5'-N-Methylcarboxamidoadenosine		HMDB0246883	-1.625	2.23176e-07	0.324211	1.04879
HMDB0247027	5Z-7-Oxozeaenol		HMDB0247027	5.77508	1.71134e-28	54.761	2.34036
HMDB0247064	6-Fluoropyridoxal		HMDB0247064	1.78356	1.82197e-06	3.44276	1.13563
HMDB0247071	6-Hydroxyazapropazone		HMDB0247071	3.23501	3.29115e-11	9.41534	1.71393
HMDB0247091	4(1H)-Pteridinone, 2-amino-6-methyl-		HMDB0247091	3.52128	6.19806e-08	11.4818	1.72515
HMDB0247104	Hexa-1,3,5-trienylbenzene		HMDB0247104	4.5787	6.09606e-19	23.896	2.03655
HMDB0247120	4-(1-Isopropyl-2-methyl-1H-imidazol-5-yl)-N-(4-(methylsulfonyl)phenyl)pyrimidin-2-amine		HMDB0247120	-2.01758	5.53576e-06	0.246972	1.15421
HMDB0247141	N-Formyl-Nle-Leu-Phe		HMDB0247141	2.45305	5.00037e-11	5.47571	1.57657
HMDB0247197	5-(2-Propoxyphenyl)-7H-[1,2,3]triazolo[4,5-d]pyrimidin-7-one		HMDB0247197	2.08205	3.73841e-08	4.23408	1.40682
HMDB0247198	3-(Pyridin-2-yldisulfanyl)propanoic acid		HMDB0247198	-3.22909	3.65455e-06	0.106646	1.34233
HMDB0247200	1-(2-Hydroxyethoxy)methyl-5-methyluracil		HMDB0247200	1.84757	1.5928e-18	3.59894	1.28944
HMDB0247224	7-(Trifluoromethoxy)indolin-2-one		HMDB0247224	-2.67718	3.40511e-09	0.156347	1.42712
HMDB0247232	7-Aminocephalosporanic acid		HMDB0247232	2.92298	4.46322e-09	7.58409	1.81907
HMDB0247245	7-Deoxydoxorubicinone		HMDB0247245	-4.65337	2.24086e-13	0.0397372	1.97474
HMDB0247248	7-Ethoxycoumarin		HMDB0247248	-3.18086	5.66439e-06	0.110272	1.22827
HMDB0247249	7-Ethoxyresorufin		HMDB0247249	-1.75588	0.00010486	0.296094	1.28336
HMDB0247267	7-Methoxy-2,3-dihydropyrrolo[2,1-b]quinazolin-9(1H)-one		HMDB0247267	2.24929	6.346e-09	4.7545	1.38424
HMDB0247322	4-Bis(2-hydroxyethyl)amino-L-phenylalanine		HMDB0247322	1.8092	4.55974e-08	3.50449	1.20105
HMDB0247344	3,4-Dehydrocilostazol		HMDB0247344	4.3235	5.61616e-13	20.0218	2.17165
HMDB0247360	Pregnanetriol 3a-O-b-D-glucuronide		HMDB0247360	-4.01289	7.23231e-08	0.0619442	1.67476
HMDB0247386	4-((6-Methoxyquinolin-8-yl)amino)pentanoic acid		HMDB0247386	-3.23605	5.91175e-07	0.106133	1.38079
HMDB0247418	8-Aminooctanoic acid		HMDB0247418	2.86597	4.24117e-15	7.29025	1.62909
HMDB0247534	N-[(Z)-1,3-Dihydroxyoctadec-4-en-2-yl]-6-[(4-nitro-2,1,3-benzoxadiazol-7-yl)amino]hexanamide		HMDB0247534	-5.96708	0.000229599	0.0159857	1.38805
HMDB0247560	1-(1-(Tert-Butoxycarbonyl)piperidin-4-yl)azetidine-3-carboxylic acid		HMDB0247560	1.30539	1.5286e-05	2.4715	1.09537
HMDB0247606	9-Octadecen-1-ol, (9Z)-		HMDB0247606	-5.18976	1.71245e-15	0.0273984	2.17175
HMDB0247629	1,3-Benzenedicarbonitrile, 2-[[4-[[2-(acetyloxy)ethyl]butylamino]-2-methylphenyl]azo]-5-nitro-		HMDB0247629	2.07354	1.78192e-05	4.20919	1.55747
HMDB0247697	2-[(4-Oxo-3-phenyl-4H-chromen-7-YL)oxy]propanoic acid		HMDB0247697	-3.29609	7.08032e-05	0.101807	1.21839
HMDB0247713	Pentanoic acid, 5-(dipentylamino)-5-oxo-4-((3-quinolinylcarbonyl)amino)-, (R)-		HMDB0247713	-4.13416	1.14057e-06	0.05695	1.49419
HMDB0247717	Octadeca-9,12-dienal		HMDB0247717	-3.67469	1.66271e-15	0.0783083	1.80756
HMDB0247737	N-(8-Amino-1-carboxyoctyl)-alanyl-proline		HMDB0247737	3.27243	1.05404e-10	9.66274	1.80959
HMDB0247749	Abemaciclib		HMDB0247749	-2.54231	9.25013e-11	0.171668	1.45391
HMDB0247803	(E,E,E)-Geranylgeranyl alcohol		HMDB0247803	-1.88249	1.8381e-06	0.271215	1.02721
HMDB0247836	4-[[2-(4-Cyanoanilino)pyrimidin-4-yl]amino]-3,5-dimethylbenzonitrile		HMDB0247836	3.60144	7.68802e-07	12.1378	1.47588
HMDB0247904	2-(p-Acetamidophenyl)-2-ethylglutarimide		HMDB0247904	2.59962	3.67707e-10	6.06127	1.65862
HMDB0247927	alpha-Acetyllysine		HMDB0247927	-2.05739	1.72077e-06	0.240251	1.12772
HMDB0247936	Acetylshikonin		HMDB0247936	3.27343	1.06509e-16	9.66941	1.74628
HMDB0248017	Aditoprim		HMDB0248017	3.6597	1.55869e-14	12.6381	1.86182
HMDB0248072	Ajmalicine		HMDB0248072	3.05287	4.25553e-08	8.29861	1.53881
HMDB0248084	Aklavin		HMDB0248084	4.23486	3.1067e-12	18.8287	1.8573
HMDB0248094	Ala-Hyp-Gly		HMDB0248094	3.53196	2.73415e-18	11.5672	1.81352
HMDB0248105	Alanine lactate pyruvate		HMDB0248105	-1.96974	1.0146e-08	0.255299	1.1973
HMDB0248117	Albifylline		HMDB0248117	4.51647	3.3774e-10	22.8871	1.83229
HMDB0248130	Aleglitazar		HMDB0248130	5.88562	1.28085e-19	59.1219	2.31305
HMDB0248145	Alizarin complexone		HMDB0248145	-4.15105	1.03259e-06	0.0562873	1.58922
HMDB0248146	Alkaloid A		HMDB0248146	1.60001	7.187e-08	3.03146	1.16412
HMDB0248237	alpha-Muramic acid		HMDB0248237	-2.18409	1.09281e-05	0.220052	1.14292
HMDB0248245	alpha-Tocopherol phosphate		HMDB0248245	-2.68867	9.88928e-06	0.155107	1.29644
HMDB0248263	Alvameline		HMDB0248263	1.37966	4.97506e-08	2.60207	1.1031
HMDB0248325	3-(Aminomethyl)-2,5,9-trimethyl-7H-furo[3,2-g]chromen-7-one		HMDB0248325	1.76395	1.43313e-05	3.39626	1.18088
HMDB0248615	Arphamenine B		HMDB0248615	3.70451	9.97912e-14	13.0368	1.95831
HMDB0248631	(2S)-(+)-5-(1,3,5-Trimethylpyrazol-4-YL)-2-(dimethylamino)tetralin		HMDB0248631	1.59923	0.00119355	3.02981	1.06813
HMDB0248708	Atractylenolide III		HMDB0248708	5.29537	4.75782e-12	39.2703	2.40042
HMDB0248765	Azapropazone		HMDB0248765	2.12949	2.46973e-09	4.37562	1.37883
HMDB0248794	Azepexole		HMDB0248794	2.60448	1.13694e-15	6.08171	1.51933
HMDB0248804	Azimexon		HMDB0248804	-3.16797	7.6526e-07	0.111262	1.39436
HMDB0248844	Mayzent		HMDB0248844	-1.64461	2.49111e-08	0.319832	1.10363
HMDB0248865	Baquiloprim		HMDB0248865	2.73342	2.14516e-12	6.65032	1.54372
HMDB0248873	Baricitinib		HMDB0248873	2.50327	3.08226e-10	5.6697	1.53265
HMDB0248889	(E)-3-Tosylacrylonitrile		HMDB0248889	5.61001	6.39433e-14	48.8405	2.17802
HMDB0248905	Bctc		HMDB0248905	-3.88562	3.35419e-08	0.0676569	1.61573
HMDB0248949	benfluorex		HMDB0248949	-2.35277	3.96206e-07	0.19577	1.29656
HMDB0248980	Cyclohexa-1,2,4,5-tetraene		HMDB0248980	-2.27198	3.39183e-07	0.207046	1.22557
HMDB0249101	beta-Apopolygamatin		HMDB0249101	4.30041	0.00193911	19.704	1.10197
HMDB0249120	beta-D-glucosaminyl-(1->4)-beta-D-glucosamine		HMDB0249120	-2.99256	1.67619e-08	0.125646	1.45363
HMDB0249190	Bicyclohexyl		HMDB0249190	-2.76349	1.97553e-07	0.147268	1.34347
HMDB0249255	Bis(agmatine)oxalamide		HMDB0249255	1.85714	8.51059e-08	3.62289	1.19451
HMDB0249307	N4-(1,3-Benzodioxol-5-ylmethyl)-6-(3-methoxyphenyl)pyrimidine-2,4-diamine		HMDB0249307	1.92122	2.9053e-06	3.78744	1.17897
HMDB0249310	5-Fluoro-3-[3-[4-(5-methoxypyrimidin-4-yl)piperazin-1-yl]propyl]-1H-indole		HMDB0249310	1.76495	8.45393e-08	3.39863	1.07916
HMDB0249327	8-(2-[4-(2-Methoxyphenyl)-1-piperazinyl]ethyl)-8-azaspiro[4.5]decane-7,9-dione		HMDB0249327	5.26223	1.63677e-17	38.3785	2.15653
HMDB0249379	Brexpiprazole		HMDB0249379	-2.58393	9.72924e-15	0.166786	1.55148
HMDB0249401	Propionic acid, 2-methyl-2-((piperidinomethyl)thio)-		HMDB0249401	4.25703	2.05143e-13	19.1203	1.85754
HMDB0249407	Brucine N-oxide		HMDB0249407	-3.63234	0.000907118	0.0806414	1.0762
HMDB0249426	Budralazine		HMDB0249426	-3.31451	5.7705e-05	0.100515	1.27639
HMDB0249458	Butaxamine		HMDB0249458	3.9732	7.81072e-16	15.7055	1.99886
HMDB0249460	butenoylcarnitine		HMDB0249460	1.73687	3.23191e-08	3.33312	1.2831
HMDB0249474	Butyl acrylate		HMDB0249474	-2.48715	5.014e-10	0.178358	1.39135
HMDB0249488	N-(3-Phenoxycinnamyl)acetohydroxamic acid		HMDB0249488	2.95818	1.95255e-07	7.7714	1.58407
HMDB0249510	2-(5,6-Dimethyl-9-oxoxanthen-1-yl)acetic acid		HMDB0249510	2.89087	2.65565e-10	7.41719	1.6377
HMDB0249521	Methyl N-({(2s,3s)-3-[(Propylamino)carbonyl]oxiran-2-Yl}carbonyl)-L-Isoleucyl-L-Prolinate		HMDB0249521	1.88829	6.18836e-09	3.70196	1.30678
HMDB0249541	Calcifediol lactone		HMDB0249541	1.33239	2.54426e-06	2.51819	1.09858
HMDB0249561	Calmagite		HMDB0249561	1.58257	7.61813e-05	2.99502	1.05162
HMDB0249572	Cambinol		HMDB0249572	1.39856	1.90016e-05	2.63639	1.05005
HMDB0249637	9H-Pyrido[3,4-b]indole-3-carboxylic acid		HMDB0249637	1.43935	9.67675e-11	2.71199	1.1163
HMDB0249792	Celgosivir		HMDB0249792	1.88918	6.02538e-09	3.70424	1.31229
HMDB0249811	Cephamycin A		HMDB0249811	-4.43098	4.19201e-10	0.0463599	1.84148
HMDB0249950	1-(3-Methylbenzoyl)-1H-indazole-3-carbonitrile		HMDB0249950	1.13197	4.68691e-05	2.19157	1.38184
HMDB0250035	(S)-(4-Hydroxy-phenyl)-(S)-piperidin-2-yl-acetic acid methyl ester; hydrochloride		HMDB0250035	4.70095	4.41461e-22	26.0092	2.09285
HMDB0250051	s-Nitroso-n-acetyl-d-penicillamine		HMDB0250051	-7.13541	0.000146556	0.00711259	1.59428
HMDB0250066	(2S)-1-[2-(2-Adamantylamino)acetyl]pyrrolidine-2-carbonitrile		HMDB0250066	2.1149	2.12429e-07	4.33161	1.52677
HMDB0250177	Cholesterol-5beta-hydroperoxide		HMDB0250177	1.27083	4.30079e-05	2.413	1.0391
HMDB0250214	Benzoyl-prolyl-phenylalanyl-arginine-p-nitroanilide		HMDB0250214	-5.03509	1.29146e-09	0.0304991	1.93514
HMDB0250238	2-(2-Aminoethoxymethyl)-4-(2-chlorophenyl)-6-methyl-1,4-dihydropyridine-3,5-dicarboxylic acid O3-ethyl ester O5-methyl ester;benzenesulfonic acid		HMDB0250238	4.16816	6.58907e-17	17.978	1.9254
HMDB0250256	Cimoxatone		HMDB0250256	-2.32697	2.24389e-07	0.199303	1.23174
HMDB0250262	Cinepazide		HMDB0250262	-1.74976	3.84145e-06	0.297351	1.09127
HMDB0250271	Ciproxifan		HMDB0250271	-3.71504	2.16201e-09	0.0761485	1.61242
HMDB0250283	Octadec-9-enal		HMDB0250283	-2.51245	7.51347e-08	0.175258	1.32904
HMDB0250290	cis-Linoleic acid		HMDB0250290	6.33117	2.50995e-09	80.5144	2.03863
HMDB0250315	Clebopride		HMDB0250315	-3.11224	1.17637e-10	0.115644	1.56233
HMDB0250332	Clobetasone		HMDB0250332	4.11093	8.19719e-13	17.2788	2.02152
HMDB0250365	Clorgiline		HMDB0250365	-6.05054	6.57926e-15	0.0150871	2.26431
HMDB0250393	Cochinchinenin A		HMDB0250393	3.49677	3.16429e-18	11.2884	1.79266
HMDB0250421	L-Proline, 1-(N2-(1-carboxy-3-phenylpropyl)-N6-((4-hydroxyphenyl)iminomethyl)-L-lysyl)-, (S)-		HMDB0250421	4.41604	8.27116e-16	21.3481	2.03548
HMDB0250423	gamma-Secretase Inhibitor XXI		HMDB0250423	-4.21231	4.89252e-09	0.0539472	1.75722
HMDB0250445	Convicine		HMDB0250445	-1.70638	0.000372766	0.306428	1.19382
HMDB0250495	4-Methyl-2-oxo-2H-chromen-7-yl sulfamate		HMDB0250495	2.77596	1.69906e-08	6.84934	1.76941
HMDB0250596	Cutamesine		HMDB0250596	0.26536	0.00239941	1.20194	1.04837
HMDB0250599	2,3,5-Trimethyl-6-(3-pyridylmethyl)-1,4-benzoquinone		HMDB0250599	-3.03788	6.21231e-06	0.121761	1.33361
HMDB0250668	Cyclopentenyl cytosine		HMDB0250668	7.1905	1.36079e-29	146.068	2.60581
HMDB0250697	Cyprodime		HMDB0250697	-3.58781	7.55625e-10	0.0831689	1.77804
HMDB0250702	Cysteine allyl ester		HMDB0250702	4.94513	5.58988e-16	30.8057	2.06989
HMDB0250724	4-Amino-1-[(1S,2S,4S)-4,5-bis(hydroxymethyl)-2-bicyclo[3.1.0]hexanyl]pyrimidin-2-one		HMDB0250724	-2.61574	3.33981e-10	0.163149	1.42047
HMDB0250843	Danofloxacin		HMDB0250843	4.56399	8.80416e-17	23.6537	2.09128
HMDB0250876	11-(Dansylamino)undecanoic acid		HMDB0250876	1.14699	8.776e-05	2.21452	1.1213
HMDB0250889	4-(N,N-Dimethylsulfamoyl)-7-piperazino-benzofurazan		HMDB0250889	-3.33282	1.63511e-08	0.0992478	1.72852
HMDB0250914	Perflubutane		HMDB0250914	-3.11904	1.63275e-09	0.1151	1.52494
HMDB0250918	Decenoylcarnitine		HMDB0250918	2.67164	4.09379e-14	6.37152	1.58063
HMDB0250928	Decylubiquinone		HMDB0250928	3.13746	2.75002e-14	8.79975	1.71684
HMDB0250934	Deferitrin		HMDB0250934	1.43836	1.26033e-08	2.71013	1.09996
HMDB0250946	Dehydrocostus lactone		HMDB0250946	1.68038	1.8966e-09	3.20512	1.1426
HMDB0250947	Dehydrocrotonin		HMDB0250947	3.68439	3.97826e-14	12.8562	1.88332
HMDB0250960	Dehydrotumulosic acid		HMDB0250960	-1.98806	3.88722e-09	0.252077	1.21998
HMDB0251012	Deoxyqinghaosu		HMDB0251012	1.99766	1.35407e-11	3.99351	1.36063
HMDB0251056	Desmethylcyproheptadine		HMDB0251056	4.27672	6.58399e-13	19.3829	1.87876
HMDB0251073	Deuteroporphyrin		HMDB0251073	1.30548	0.000518498	2.47165	1.05278
HMDB0251076	Devd-cho		HMDB0251076	4.24827	5.68209e-09	19.0045	1.69851
HMDB0251077	Ethyl (2S,3S)-3-[[(2S)-1-[[(2S)-1-hydroxypent-4-yn-2-yl]amino]-4-methyl-1-oxopentan-2-yl]carbamoyl]oxirane-2-carboxylate		HMDB0251077	2.29947	3.70395e-08	4.92279	1.56731
HMDB0251084	Dexanabinol		HMDB0251084	2.47839	7.47749e-06	5.57277	1.17871
HMDB0251091	Dexoxadrol		HMDB0251091	-4.12623	2.92343e-09	0.0572639	1.78409
HMDB0251235	Diethadione		HMDB0251235	4.42232	2.05408e-13	21.4413	2.10029
HMDB0251246	Diethylene glycol dimethacrylate		HMDB0251246	1.18855	2.92491e-05	2.27923	1.10703
HMDB0251253	Dictyostelium		HMDB0251253	-2.87488	6.56564e-06	0.136324	1.29776
HMDB0251260	Diflucortolone		HMDB0251260	-3.68465	0.000259881	0.0777698	1.27488
HMDB0251293	Dihydroalprenolol		HMDB0251293	-3.73728	1.04264e-08	0.0749836	1.62308
HMDB0251305	Dihydrodigitoxin		HMDB0251305	-1.71878	1.26742e-06	0.303806	1.10996
HMDB0251422	Dinitropyrene		HMDB0251422	-3.33916	3.56292e-11	0.0988128	2.00387
HMDB0251442	Dipfluzine		HMDB0251442	-4.69065	2.61237e-07	0.0387234	1.6909
HMDB0251453	Diphenyl sulfone		HMDB0251453	1.63908	9.66171e-06	3.11466	1.15275
HMDB0251473	Diprotin A		HMDB0251473	-3.20249	3.25567e-09	0.108631	1.54858
HMDB0251478	Disobutamide		HMDB0251478	-6.77467	1.99974e-10	0.00913319	2.24347
HMDB0251479	Disofenin		HMDB0251479	3.47573	9.84364e-14	11.125	1.82573
HMDB0251509	DL-Alanyl-DL-leucine		HMDB0251509	-2.80836	6.84652e-07	0.142758	1.31109
HMDB0251538	4-[2-(3,4-Dihydro-6,7-dimethoxy-4-methyl-3-oxo-2-quinoxalinyl)ethyl]-3H-1,2,4-triazole-3,5(4H)-dione		HMDB0251538	-2.00675	2.04469e-06	0.248834	1.28432
HMDB0251550	2-Hydroxy-4-carboxybutyrylhistidylprolinamide		HMDB0251550	2.41637	1.89877e-07	5.33825	1.65655
HMDB0251565	Dodecafluoropentane		HMDB0251565	2.50344	2.27967e-06	5.67036	1.28979
HMDB0251608	Cedpht		HMDB0251608	3.17831	6.27182e-13	9.05245	1.7344
HMDB0251641	Durandro		HMDB0251641	1.77686	2.65054e-07	3.4268	1.28363
HMDB0251660	4H-Pyrido(4',3':4,5)thieno(3,2-f)(1,2,4)triazolo(4,3-a)(1,4)diazepine, 7,8,9,10-tetrahydro-6-(2-chlorophenyl)-9-(cyclopropylcarbonyl)-1,4-dimethyl-, (S)-		HMDB0251660	4.82268	1.19233e-20	28.2991	2.07839
HMDB0251678	Eburicoic acid		HMDB0251678	-1.32251	1.23791e-11	0.39984	1.03549
HMDB0251679	1-Palmitoyl-2-linoleoyl-3-acetyl-rac-glycerol		HMDB0251679	1.21619	3.85231e-05	2.32332	1.02873
HMDB0251736	Elastin		HMDB0251736	2.35916	1.42834e-07	5.13072	1.46161
HMDB0251804	Endralazine		HMDB0251804	1.99255	2.39933e-08	3.97941	1.37315
HMDB0251865	Epitalon		HMDB0251865	-4.74138	0.000934924	0.0373854	1.22077
HMDB0251888	epsilon-(Hexanoyl)lysine		HMDB0251888	-2.54475	5.67754e-05	0.171377	1.09909
HMDB0251892	Eptastigmine		HMDB0251892	-2.2478	3.19559e-08	0.210545	1.26911
HMDB0251931	Erythrocentaurin		HMDB0251931	-2.11346	8.50351e-06	0.231092	1.11973
HMDB0251946	Esculeogenin A		HMDB0251946	-3.15293	9.35199e-11	0.112428	1.57403
HMDB0251990	Etazolate		HMDB0251990	1.45724	9.45069e-09	2.74582	1.12525
HMDB0252008	Ethaverine		HMDB0252008	-4.2616	3.71812e-13	0.0521352	1.95901
HMDB0252125	Eugenosedin-A		HMDB0252125	3.3925	2.04047e-18	10.5013	1.74561
HMDB0252162	Falnidamol		HMDB0252162	-1.99835	0.000216509	0.250286	1.25612
HMDB0252212	Fenoxycarb		HMDB0252212	2.34014	5.50487e-10	5.06352	1.47683
HMDB0252214	Fenozan 50F		HMDB0252214	-2.79894	4.12223e-09	0.143693	1.43716
HMDB0252264	Fipexide		HMDB0252264	-4.51602	1.31344e-09	0.0437061	1.80527
HMDB0252303	FLESTOLOL		HMDB0252303	1.99477	1.42973e-07	3.98553	1.39124
HMDB0252316	Flosequinan		HMDB0252316	-1.85445	1.01417e-06	0.276538	1.16692
HMDB0252392	Fluoroquinolone carboxylic		HMDB0252392	2.24651	4.93681e-08	4.74535	1.23007
HMDB0252427	Foliandrin		HMDB0252427	-3.90411	1.53729e-07	0.0667954	1.59158
HMDB0252498	Fructosylvaline		HMDB0252498	-2.27545	2.97094e-07	0.206547	1.24778
HMDB0252515	Fumagillol		HMDB0252515	1.73514	7.34613e-11	3.32912	1.26125
HMDB0252530	Furamidine		HMDB0252530	2.38601	9.15295e-13	5.22709	1.48959
HMDB0252560	[2-(4-Acetoxy-3-methoxy-phenyl)-7-methoxy-5-methyl-2,3-dihydrobenzofuran-3-yl]methyl acetate		HMDB0252560	-2.27718	9.89943e-10	0.206301	1.32679
HMDB0252603	Galunisertib		HMDB0252603	1.32506	4.27979e-05	2.50543	1.11879
HMDB0252638	2-[[3-[[2-(Dimethylamino)phenyl]methyl]-2-pyridin-4-yl-1,3-diazinan-1-yl]methyl]-N,N-dimethylaniline		HMDB0252638	-3.95677	2.90151e-07	0.0644011	1.55367
HMDB0252713	Ghrelin agonist HM01		HMDB0252713	4.33823	5.86525e-18	20.2273	1.95361
HMDB0252721	Ginkgolic acid C15:1		HMDB0252721	-3.2777	0.000125111	0.103113	1.13747
HMDB0252777	Glucose ketone		HMDB0252777	-5.17744	2.50226e-08	0.0276335	1.87817
HMDB0252817	Glutathione bicarbonate		HMDB0252817	-2.66686	0.000428372	0.157469	1.06315
HMDB0252853	1-Monolinolenoyl-rac-glycerol		HMDB0252853	1.5296	3.68894e-07	2.88707	1.19171
HMDB0252857	Glycerylmonooleate		HMDB0252857	-2.3564	1.08707e-05	0.195278	1.16683
HMDB0252869	2-[(Tetrahydrofurfuryl)oxy]ethanol		HMDB0252869	1.46408	6.48061e-12	2.75887	1.13006
HMDB0252946	(2S)-2-(Butanoylamino)-5-[[(1R)-2-(carboxymethylamino)-2-oxo-1-(sulfanylmethyl)ethyl]amino]-5-oxo-pentanoic acid		HMDB0252946	1.71008	3.7447e-07	3.27179	1.20761
HMDB0252955	2-Methyl-1-(2-methyl-3-(trifluoromethyl)benzyl)-6-morpholino-1H-benzo[d]imidazole-4-carboxylic acid		HMDB0252955	-3.07841	2.76495e-07	0.118387	1.4504
HMDB0252989	5-(3-Methoxy-4-((4-methoxybenzyl)oxy)benzyl)pyrimidine-2,4-diamine		HMDB0252989	-3.51663	9.68082e-13	0.0873755	1.81732
HMDB0253011	H-D-Tyr-val-gly-OH		HMDB0253011	1.31019	4.61727e-05	2.47975	1.12067
HMDB0253033	Val-Gly-Val-Ala-Pro-Gly		HMDB0253033	-4.89026	2.49575e-06	0.0337197	1.67464
HMDB0253040	Halofenozide		HMDB0253040	3.09612	2.38768e-08	8.55114	1.67372
HMDB0253041	Halometasone		HMDB0253041	-1.57257	6.56767e-08	0.336208	1.05992
HMDB0253100	Heptadeca-2,4,6-trienoic acid		HMDB0253100	1.33764	2.26909e-06	2.52737	1.07709
HMDB0253125	(4E,7E,10E,13E)-Hexadeca-4,7,10,13-tetraenoic acid		HMDB0253125	1.2508	2.15256e-09	2.37973	1.04249
HMDB0253127	Hexadecenoylcarnitine		HMDB0253127	1.54968	7.84122e-07	2.92752	1.17715
HMDB0253175	Hippuryl-glycyl-glycine		HMDB0253175	5.51927	9.45971e-24	45.8632	2.2761
HMDB0253209	Homosalate		HMDB0253209	2.31561	2.16788e-07	4.97814	1.41222
HMDB0253220	1-O-Hexyl-2,3,5-trimethylhydroquinone		HMDB0253220	1.60275	8.69793e-14	3.03721	1.1924
HMDB0253234	Hycanthone		HMDB0253234	1.37188	2.85579e-06	2.58807	1.00811
HMDB0253254	Hydroxy Tyrosol -Acetate		HMDB0253254	2.23428	4.52599e-08	4.70528	1.60178
HMDB0253293	Hydroxysteroid		HMDB0253293	-2.06869	3.15805e-06	0.238376	1.08812
HMDB0253305	Hymenoxon		HMDB0253305	1.8749	1.69183e-12	3.66775	1.28606
HMDB0253336	Ibuproxam		HMDB0253336	1.47775	8.53595e-05	2.78513	1.01228
HMDB0253349	N,N-Bis(allyl)-tyr-gly-gly-psi-methylthio-phe-leu		HMDB0253349	-5.44199	1.23405e-05	0.0230037	1.55537
HMDB0253353	2-[2-[(1R,2R)-1-(5-Tert-butyl-2-methoxyphenyl)-2-(dimethylamino)-1-hydroxypropyl]phenoxy]acetamide		HMDB0253353	2.20647	3.04753e-08	4.61546	1.47046
HMDB0253366	Iclaprim		HMDB0253366	-2.8185	1.23328e-09	0.141758	1.54822
HMDB0253375	Idazoxan		HMDB0253375	-3.10696	1.84301e-07	0.116067	1.39763
HMDB0253397	Ile-Ile-Ala-Glu-Lys		HMDB0253397	-6.99622	2.66295e-13	0.00783302	2.44073
HMDB0253399	Ilexgenin A		HMDB0253399	1.38257	2.15043e-09	2.60733	1.06646
HMDB0253409	Imepitoin		HMDB0253409	3.42426	2.93859e-15	10.7351	1.80429
HMDB0253417	Imidazole citrate		HMDB0253417	1.77085	1.04668e-06	3.41256	1.25993
HMDB0253457	Indicine		HMDB0253457	1.40331	3.26599e-08	2.64507	1.09751
HMDB0253504	Intoplicine		HMDB0253504	9.97906	2.2563e-31	1009.25	3.08497
HMDB0253559	N-(4-(2,5-Dihydro-5-oxo-3-furanyl)phenyl)-4-(beta-D-glucopyranosyloxy)benzamide		HMDB0253559	3.64459	0.000106191	12.5063	1.18608
HMDB0253569	Iprofenin		HMDB0253569	1.89677	5.66097e-10	3.7238	1.2322
HMDB0253591	Isamoxole		HMDB0253591	-3.66048	0.000159246	0.0790833	1.29067
HMDB0253625	Isocoumarin		HMDB0253625	-2.90576	1.66823e-06	0.133437	1.34815
HMDB0253648	Isoindoline		HMDB0253648	-2.16694	9.71364e-07	0.222683	1.17525
HMDB0253722	Itopride		HMDB0253722	-3.49445	0.000412156	0.0887292	1.11759
HMDB0253741	(S)-N-Benzyl-2-((S)-2-(2-hydroxyacetyl)pyrrolidine-1-carbonyl)pyrrolidine-1-carboxamide		HMDB0253741	-2.53659	8.34837e-08	0.17235	1.53722
HMDB0253748	4-Ethylnaphthalen-1-yl-(1-pentylindol-3-yl)methanone		HMDB0253748	-3.44099	2.48715e-08	0.0920788	1.7492
HMDB0253763	Karanjin		HMDB0253763	3.30115	9.07412e-11	9.857	1.79177
HMDB0253771	{3,5-Dichloro-4-[4-Hydroxy-3-(Propan-2-Yl)phenoxy]phenyl}acetic Acid		HMDB0253771	-3.96686	4.37501e-11	0.0639522	1.80795
HMDB0253795	(E)-8-(3,4-Dimethoxystyryl)-7-methyl-1,3-dipropylxanthine		HMDB0253795	-2.58979	7.96587e-07	0.166109	1.37816
HMDB0253814	Tert-Butyl 3-((3S,6S,12aS)-6-isobutyl-9-methoxy-1,4-dioxo-1,2,3,4,6,7,12,12a-octahydropyrazino[1',2':1,6]pyrido[3,4-b]indol-3-yl)propanoate		HMDB0253814	3.6544	2.15783e-06	12.5917	1.37468
HMDB0253886	L-Gluconic acid		HMDB0253886	3.38402	1.18901e-09	10.4398	1.87695
HMDB0253911	L-Prolinamide, 5-oxo-L-prolyl-L-norvalyl-		HMDB0253911	5.12165	1.09616e-12	34.8153	2.39238
HMDB0253943	Lactate carbon		HMDB0253943	-2.87559	5.77877e-07	0.136258	1.34947
HMDB0253995	Lavendustin A		HMDB0253995	-3.3852	0.000111839	0.0957088	1.22275
HMDB0253996	lavendustin c		HMDB0253996	-2.29439	0.00019615	0.203854	1.10111
HMDB0254028	Leu-leu-ome		HMDB0254028	-2.60883	6.66931e-09	0.163932	1.56678
HMDB0254070	Lexacalcitol		HMDB0254070	-3.1743	7.97858e-17	0.110775	1.70723
HMDB0254082	Lidofenin		HMDB0254082	1.86151	2.44741e-09	3.63389	1.25862
HMDB0254159	Loperamide oxide		HMDB0254159	-3.30414	4.21431e-06	0.10124	1.42796
HMDB0254174	Loureirin A		HMDB0254174	3.7683	1.22748e-10	13.6261	1.93452
HMDB0254190	(2S)-2-(4,6-Dimethylpyrimidin-2-yl)oxy-3,3-diphenylbutanoic acid		HMDB0254190	4.50371	5.00169e-18	22.6856	1.99712
HMDB0254245	N-Acetyl-N-[(2S)-3-(1H-indol-3-yl)-2-[[2-(4-piperidin-1-ylpiperidin-1-yl)acetyl]amino]propyl]-2-methoxybenzamide		HMDB0254245	-3.67403	7.46201e-08	0.0783441	1.53099
HMDB0254273	Lysosulfatide		HMDB0254273	4.43241	4.68207e-14	21.5918	2.05335
HMDB0254406	Medrogestone		HMDB0254406	5.65066	8.33078e-15	50.2362	2.18747
HMDB0254454	Mepirizole		HMDB0254454	-2.90104	0.000599891	0.133875	1.00276
HMDB0254508	METAZACHLOR		HMDB0254508	-3.48326	3.54218e-05	0.0894202	1.20753
HMDB0254557	methyl (9E,12Z)-octadeca-9,12-dienoate		HMDB0254557	7.41295	1.61311e-13	170.42	2.42277
HMDB0254562	Methyl 16-hydroxyhexadecanoate		HMDB0254562	1.79598	3.03263e-09	3.4725	1.28442
HMDB0254612	Methyl retinoate		HMDB0254612	3.95774	7.29691e-07	15.5382	1.49634
HMDB0254628	Methyldopate		HMDB0254628	2.09157	1.58676e-08	4.26212	1.35113
HMDB0254737	Minaxolone		HMDB0254737	3.80244	4.14957e-10	13.9524	1.67044
HMDB0254743	Myotoxin A		HMDB0254743	3.80262	4.94776e-14	13.9541	1.89
HMDB0254754	Miserotoxin		HMDB0254754	-2.57633	4.57365e-07	0.167667	1.29316
HMDB0254755	Misonidazole		HMDB0254755	1.58587	1.74164e-09	3.00189	1.1023
HMDB0254792	Propanamide, N-((1S,2S)-2-(3-cyanophenyl)-3-(4-(2-fluoroethoxy)phenyl)-1-methylpropyl)-2-methyl-2-((5-methyl-2-pyridinyl)oxy)-		HMDB0254792	-4.09377	6.27464e-05	0.0585668	1.31287
HMDB0254798	2-(5-Fluoropentyl)-2-methylmalonic acid		HMDB0254798	1.28237	3.91272e-07	2.43238	1.03136
HMDB0254804	2-[[5-[3-(Dimethylamino)propyl]-2-methylpyridin-3-yl]amino]-9-(trifluoromethyl)-5,7-dihydropyrimido[5,4-d][1]benzazepine-6-thione		HMDB0254804	4.67309	0.00146007	25.5118	1.10715
HMDB0254850	2,3-Dihydroxypropyl octanoate		HMDB0254850	1.58481	1.10785e-05	2.99968	1.30166
HMDB0254879	Mopidralazine		HMDB0254879	1.70673	2.08531e-07	3.2642	1.22424
HMDB0254880	3[N-Morpholino]propane sulfonic acid		HMDB0254880	-2.18624	3.22699e-07	0.219724	1.33413
HMDB0254966	Mycarose		HMDB0254966	1.37412	2.11741e-08	2.5921	1.08098
HMDB0254979	Myristoylcarnitine		HMDB0254979	-2.10039	2.16218e-10	0.233195	1.30158
HMDB0254988	N-(2-Hydroxyethyl)nicotinamide		HMDB0254988	1.44379	1.15694e-10	2.72034	1.09832
HMDB0254995	N-(2,3,4-Trihydroxybutyl)-L-valine		HMDB0254995	1.93607	9.2708e-11	3.82662	1.30503
HMDB0255007	N-(4-Aminobenzoyl)-L-glutamic acid		HMDB0255007	3.16066	3.13618e-10	8.9424	1.88092
HMDB0255025	N-(N-(3-Amino-3-carboxypropyl)-3-amino-3-carboxypropyl)azetidine-2-carboxylic acid		HMDB0255025	-1.54416	2.83778e-07	0.342896	1.03084
HMDB0255061	N-Acetyl-S-benzyl-L-cysteine		HMDB0255061	3.50314	8.31243e-14	11.3384	1.69593
HMDB0255086	N-Benzoyl-D-phenylalanine		HMDB0255086	-3.41527	1.69973e-06	0.0937349	1.35901
HMDB0255090	N-BENZYL-3-CYANOAZETIDINE		HMDB0255090	2.94293	2.07826e-17	7.68971	1.62523
HMDB0255097	n-carboxymethyllysine		HMDB0255097	-2.06189	1.2246e-10	0.239503	1.28193
HMDB0255116	N-Desisopropyl Pentisomide		HMDB0255116	-3.44914	7.77521e-05	0.0915597	1.19244
HMDB0255128	n-docosahexaenoylethanolamine		HMDB0255128	-2.60899	1.69801e-05	0.163914	1.16184
HMDB0255154	N-hydroxyl-tryptamine		HMDB0255154	3.1775	6.06921e-16	9.04737	1.67116
HMDB0255162	N-Isobutyryl-L-cysteine		HMDB0255162	1.34415	3.97608e-05	2.53881	1.13032
HMDB0255166	N-Methacryloyl-L-glutamic acid		HMDB0255166	-2.66692	4.97506e-08	0.157462	1.38933
HMDB0255167	n-methacryloyl-l-histidine methyl ester		HMDB0255167	4.95931	1.68864e-22	31.1102	2.15695
HMDB0255230	N-Phenylnicotinamide		HMDB0255230	2.12178	1.31108e-15	4.35229	1.36555
HMDB0255234	N-Propionylprocainamide		HMDB0255234	2.07155	1.03315e-11	4.20339	1.3754
HMDB0255284	N(4)-Oleylcytosine arabinoside		HMDB0255284	-1.88201	1.06025e-05	0.271306	1.01759
HMDB0255293	N2-Ethyl-2'-deoxyguanosine		HMDB0255293	-1.51757	5.03701e-05	0.349274	1.02086
HMDB0255325	(2S)-2-Amino-6-[(3-formylpiperidin-1-yl)amino]hexanoic acid		HMDB0255325	2.63685	1.59531e-10	6.2197	1.40427
HMDB0255339	1-Oxononan-4-yl (2R)-2-acetamido-3-sulfanylpropanoate		HMDB0255339	1.46375	7.28321e-06	2.75824	1.23562
HMDB0255374	2-Amino-4-[carbamimidoyl(methyl)amino]butanoic acid		HMDB0255374	-2.54981	0.000358814	0.170778	1.09157
HMDB0255401	3-(2-Aminoethyl)-5-methoxy-N-[2-(5-methoxy-1H-indol-3-yl)ethyl]indol-1-amine		HMDB0255401	-2.55238	2.07987e-08	0.170474	1.35038
HMDB0255402	3-(2-Ethyl-5-hydroxyhexyl)phthalic acid		HMDB0255402	1.74063	9.62204e-10	3.3418	1.1794
HMDB0255407	3-(4-Hydroxyphenyl)-3,5,6,8-tetrahydro-2H-chromene-4,7-dione		HMDB0255407	-1.59105	6.20373e-07	0.331929	1.06231
HMDB0255434	Naloxazone		HMDB0255434	5.3177	1.47332e-29	39.883	2.23319
HMDB0255449	Naphthionic acid		HMDB0255449	1.98507	2.55655e-18	3.95882	1.34473
HMDB0255454	1-(1-Naphthyl)ethylenediamine		HMDB0255454	-1.92614	0.000179997	0.263132	1.10881
HMDB0255456	Naproxcinod		HMDB0255456	3.28608	1.72481e-17	9.75462	1.74284
HMDB0255510	(2S,3S)-Nemonapride		HMDB0255510	1.40286	2.21566e-06	2.64426	1.00535
HMDB0255516	Neoandrographolide		HMDB0255516	5.13648	0.000590603	35.1751	1.18323
HMDB0255528	Neopetasin		HMDB0255528	1.7069	4.1256e-07	3.26459	1.28992
HMDB0255538	Neplanocin A		HMDB0255538	2.15337	3.53156e-09	4.44866	1.37123
HMDB0255620	Nipradilol		HMDB0255620	2.27843	2.39615e-13	4.8515	1.43239
HMDB0255638	Nitro-prednisolone		HMDB0255638	1.00097	0.00023315	2.00135	1.11789
HMDB0255670	Nivacortol		HMDB0255670	-3.322	0.000402399	0.099995	1.12247
HMDB0255678	Noberastine		HMDB0255678	2.09946	5.40761e-11	4.28548	1.33511
HMDB0255699	Nolomirole		HMDB0255699	2.67284	2.58788e-19	6.37681	1.58717
HMDB0255709	2-[2-(4-Nonylphenoxy)ethoxy]ethanol		HMDB0255709	-1.7396	3.6034e-08	0.299453	1.12129
HMDB0255713	Nonylurea		HMDB0255713	1.45185	0.000305949	2.73558	1.23692
HMDB0255714	Noopept		HMDB0255714	2.06554	6.97359e-10	4.1859	1.37558
HMDB0255716	4-(E)-Ethyl-2-((E)-hydroxyimino)-5-nitro-3-hexeneamide		HMDB0255716	2.14769	1.15806e-11	4.43119	1.4028
HMDB0255719	Normephedrone		HMDB0255719	2.0768	1.42226e-07	4.21872	1.48907
HMDB0255721	Tecastemizole		HMDB0255721	1.78255	1.91612e-07	3.44034	1.1929
HMDB0255751	norscopolamine		HMDB0255751	3.8171	1.83414e-14	14.0949	1.95696
HMDB0255756	NOTA		HMDB0255756	-1.53763	6.16172e-07	0.344452	1.00651
HMDB0255757	Nothofagin		HMDB0255757	-3.42748	4.68096e-05	0.0929448	1.22851
HMDB0255778	5-(1,3-Benzodioxol-5-yl)-1-piperidin-1-ylpenta-2,4-dien-1-one		HMDB0255778	3.33512	6.02782e-13	10.0918	1.8268
HMDB0255792	1-Methyl-1,2-dihydrobenzo[j]aceanthrylene		HMDB0255792	1.33939	1.23426e-05	2.53045	1.15145
HMDB0255793	1,2 Dipalmitoylphosphatidylcholine		HMDB0255793	2.59368	2.12054e-06	6.03638	1.41039
HMDB0255794	1-[3,4-Dihydroxy-5-(hydroxymethyl)oxolan-2-yl]-5-hydroxyimidazole-4-carboxamide		HMDB0255794	-2.90527	4.21269e-08	0.133483	1.4427
HMDB0255807	Chloroethyl nitrosourea		HMDB0255807	-2.88572	3.60619e-05	0.135304	1.18612
HMDB0255823	Nvp dpp 728 dihydrochloride		HMDB0255823	3.65493	7.51459e-13	12.5963	1.95593
HMDB0255849	O-Desmethylmethoxyphenamine		HMDB0255849	-2.62125	0.000903884	0.162527	1.01026
HMDB0255850	O-Demethylmetoprolol		HMDB0255850	3.5842	2.38892e-14	11.9937	1.88596
HMDB0255869	O-Succinylcarnitine		HMDB0255869	2.10574	2.44974e-09	4.30418	1.47105
HMDB0255887	Oclacitinib		HMDB0255887	-2.33103	1.26943e-06	0.198742	1.26468
HMDB0255896	Octadecaneperoxoic acid		HMDB0255896	-3.64043	3.2971e-15	0.08019	1.8021
HMDB0255909	Octinoxate		HMDB0255909	6.26285	1.61617e-14	76.7899	2.5705
HMDB0255910	Octocrylene		HMDB0255910	-5.25052	5.68511e-09	0.0262685	1.94985
HMDB0255924	p-Hydroxyubenimex		HMDB0255924	1.60092	1.90085e-07	3.03336	1.19288
HMDB0255963	Omapatrilat		HMDB0255963	3.66692	1.06716e-12	12.7014	1.73909
HMDB0256019	Oxypertine		HMDB0256019	1.73475	0.000276933	3.32822	1.07209
HMDB0256029	Phenothiazine, 10-((N-butyl-2-piperidyl)methyl)-		HMDB0256029	-4.47022	9.22169e-16	0.0451158	2.00348
HMDB0256030	[3-[2-Aminoethoxy(hydroxy)phosphoryl]oxy-2-hydroxypropyl] hexadecanoate		HMDB0256030	2.24391	7.9095e-09	4.73678	1.44431
HMDB0256056	p-Terphenyl		HMDB0256056	2.60743	1.55869e-14	6.09419	1.57188
HMDB0256104	Pamatolol		HMDB0256104	2.68172	2.97096e-09	6.41622	1.73106
HMDB0256113	Panomifene		HMDB0256113	2.66298	1.17371e-13	6.33342	1.6006
HMDB0256117	beta-Alanyl-L-histidine		HMDB0256117	1.69037	7.52748e-08	3.2274	1.09253
HMDB0256121	Paracetamol mercapturate		HMDB0256121	4.34942	1.1133e-13	20.3848	2.13664
HMDB0256132	Parsalmide		HMDB0256132	-1.92669	6.61272e-05	0.263032	1.12154
HMDB0256185	6-(2,6-Dimethoxypyridin-3-yl)-9-ethoxy-8-methoxy-1,2,3,4,4a,10b-hexahydrophenanthridin-2-ol		HMDB0256185	-4.80929	4.32364e-14	0.0356664	2.04064
HMDB0256205	Peimine		HMDB0256205	1.90328	2.29452e-05	3.74062	1.00578
HMDB0256206	Peiminine		HMDB0256206	-2.99685	2.82721e-06	0.125273	1.28222
HMDB0256207	Peimisine		HMDB0256207	-1.73197	2.53185e-06	0.301041	1.11219
HMDB0256211	Pelrinone		HMDB0256211	1.3006	4.25385e-06	2.46331	1.01635
HMDB0256227	Penicillanic acid		HMDB0256227	-3.29565	0.000751451	0.101838	1.05376
HMDB0256295	Amyl nitrate		HMDB0256295	-1.40416	1.28217e-09	0.377837	1.016
HMDB0256303	Peramine		HMDB0256303	2.00519	2.91018e-09	4.01443	1.35451
HMDB0256354	Perylene-1,2-dione		HMDB0256354	-3.75184	3.87757e-08	0.0742306	1.56237
HMDB0256364	2-(6-(5-Chloro-2-methoxyphenyl)-4-oxo-2-thioxo-3,4-dihydropyrimidin-1(2H)-yl)acetamide		HMDB0256364	-2.25982	4.80145e-07	0.208798	1.4104
HMDB0256395	Phenazine		HMDB0256395	5.76458	2.247e-22	54.3639	2.35121
HMDB0256396	Phenazine-2,3-diamine		HMDB0256396	1.50628	3.42442e-11	2.84076	1.12653
HMDB0256421	Phenyl 1-hydroxy-2-naphthoate		HMDB0256421	2.55005	1.52651e-07	5.85656	1.57629
HMDB0256438	Phenylcyclohexyldiethylamine		HMDB0256438	-4.73843	1.59217e-07	0.037462	1.71107
HMDB0256554	Pimonidazole		HMDB0256554	4.91698	1.40582e-23	30.2106	2.14546
HMDB0256574	PIPERIDIN-2-IMINE		HMDB0256574	2.01815	9.50724e-10	4.05063	1.33861
HMDB0256589	Pirarubicinol		HMDB0256589	6.1687	3.36487e-23	71.9391	2.39435
HMDB0256604	Piritrexim		HMDB0256604	2.51402	6.09031e-14	5.7121	1.51878
HMDB0256624	N~2~,N~2~-Dimethyl-N~1~-(6-oxo-5,6-dihydrophenanthridin-2-YL)glycinamide		HMDB0256624	3.56846	9.87918e-12	11.8635	1.84078
HMDB0256662	Ethyl 2-(5-(4-chlorophenyl)pentyl)oxiran-2-carboxylate		HMDB0256662	-3.56198	3.36675e-07	0.0846714	1.48721
HMDB0256673	Polygodial		HMDB0256673	1.25898	1.13276e-08	2.39326	1.04586
HMDB0256688	Polyporenic acid C		HMDB0256688	-2.55929	6.42663e-16	0.169659	1.5492
HMDB0256689	Pro-Pro-Pro		HMDB0256689	1.37922	4.52352e-06	2.60127	1.09831
HMDB0256713	Pozanicline		HMDB0256713	1.45487	9.76503e-08	2.74132	1.17413
HMDB0256764	Prenylcysteine		HMDB0256764	3.74311	3.29259e-14	13.3903	1.8631
HMDB0256780	Prizidilol		HMDB0256780	1.97229	1.23741e-08	3.92391	1.31669
HMDB0256808	Propacetamol		HMDB0256808	2.28739	7.21796e-09	4.88171	1.44814
HMDB0256816	Propanidid		HMDB0256816	3.33893	1.65475e-13	10.1186	1.79427
HMDB0256831	Propoxate		HMDB0256831	1.80599	7.46091e-08	3.4967	1.15879
HMDB0256842	Rosterolone		HMDB0256842	-4.24895	9.2086e-05	0.0525943	1.26545
HMDB0256907	Pinane thromboxane A2		HMDB0256907	1.63699	9.66533e-06	3.11016	1.02804
HMDB0256929	purpurogallin		HMDB0256929	-3.65759	2.35129e-06	0.0792422	1.49954
HMDB0256938	PYR-41		HMDB0256938	4.10796	4.44193e-22	17.2432	1.97536
HMDB0256951	Pyrazoloacridine		HMDB0256951	1.59453	3.02739e-06	3.01996	1.14108
HMDB0256958	Pyrazosulfuron-ethyl		HMDB0256958	-4.9191	1.41983e-07	0.0330525	1.75384
HMDB0257086	N-(1-Carboxy-3-carboxanilidopropyl)alanylproline		HMDB0257086	-2.44873	1.76366e-08	0.183172	1.33564
HMDB0257145	Remifentanil Acid		HMDB0257145	4.31559	4.00227e-13	19.9124	2.16672
HMDB0257167	Resorufin benzyl ether		HMDB0257167	2.22946	1.24865e-13	4.68957	1.39834
HMDB0257187	alpha-Pentyl-3-(2-quinolinylmethoxy)benzenemethanol		HMDB0257187	-3.98362	3.21814e-10	0.0632137	1.81855
HMDB0257241	Ripisartan		HMDB0257241	4.66108	6.33117e-05	25.3003	1.36419
HMDB0257242	Rislenemdaz		HMDB0257242	-1.86084	8.06108e-08	0.275315	1.15236
HMDB0257245	Ritobegron		HMDB0257245	1.42563	2.20044e-05	2.68632	1.24042
HMDB0257274	(R)-N1-((S)-3,3-Dimethyl-1-(methylamino)-1-oxobutan-2-yl)-N4-hydroxy-2-isobutylsuccinamide		HMDB0257274	-4.71428	1.90514e-10	0.0380944	1.88868
HMDB0257275	(S)-3-(8-(Dimethylaminomethyl)-6,7,8,9-tetrahydropyrido(1,2-a)indol-10-yl)-4-(1-methyl-3-indolyl)-1H-pyrrole-2,5-dione hydrochloride		HMDB0257275	1.77575	1.92626e-09	3.42417	1.1946
HMDB0257277	{1-[2-(4-Carbamimidoyl-benzoylamino)-propionyl]-piperidin-4-yloxy}-acetic acid		HMDB0257277	-5.63386	2.29798e-05	0.020139	1.55051
HMDB0257278	2-[1-[(2S)-2-[[4-[(E)-N'-Hydroxycarbamimidoyl]benzoyl]amino]propanoyl]piperidin-4-yl]oxyacetic acid		HMDB0257278	7.62991	4.09912e-28	198.076	2.69649
HMDB0257284	Robenacoxib		HMDB0257284	5.36087	5.14374e-33	41.0945	2.24573
HMDB0257292	Rolafagrel		HMDB0257292	3.20194	3.09091e-20	9.20196	1.72743
HMDB0257312	Rostafuroxin		HMDB0257312	1.73975	4.14658e-06	3.33978	1.00899
HMDB0257369	L-Pyroglutamyl-L-histidyl-3,3-dimethylprolinamide		HMDB0257369	-2.32049	4.94457e-05	0.2002	1.10748
HMDB0257384	S-(N,N-Diethylcarbamoyl)glutathione		HMDB0257384	7.47649	3.82867e-21	178.094	2.70052
HMDB0257400	S-Farnesyl cysteine		HMDB0257400	-1.40636	2.50515e-08	0.377262	1.00284
HMDB0257440	Sacubitrilat		HMDB0257440	2.83668	2.94071e-07	7.14374	1.87287
HMDB0257460	Salicylhydroxamic acid		HMDB0257460	1.74191	1.26388e-11	3.34479	1.26767
HMDB0257478	Sanfetrinem		HMDB0257478	1.92829	3.9574e-08	3.80603	1.38381
HMDB0257528	Zotiraciclib		HMDB0257528	-2.67825	6.98492e-11	0.156231	1.57676
HMDB0257548	beta-Alanine, N-(N-(1-carboxy-2-phenylethyl)-L-phenylalanyl)-, (S)-		HMDB0257548	4.33452	5.40614e-11	20.1753	2.33833
HMDB0257599	1-(3-Hydroxy-2,2,6-trimethyl-3,4-dihydrochromen-4-yl)pyrrolidin-2-one		HMDB0257599	2.80296	3.23163e-09	6.9787	1.4159
HMDB0257646	18-Nitrooctadeca-9,12-dienoic acid		HMDB0257646	3.25819	1.07099e-11	9.56782	1.8934
HMDB0257654	3-[4-Hydroxy-3-[3-(4-hydroxyphenyl)prop-2-enoyloxy]phenyl]prop-2-enoic acid		HMDB0257654	3.36086	1.16435e-08	10.2735	1.87023
HMDB0257665	3-[4-(2-Methylpropyl)phenyl]-2-oxobutane-1-sulfonamide		HMDB0257665	2.72754	6.47582e-11	6.62323	1.64656
HMDB0257732	2-Amino-9-(6-aminopurin-9-yl)-1H-purin-6-one		HMDB0257732	-1.72847	1.41675e-05	0.301771	1.00939
HMDB0257734	[(2S)-2-Amino-3-(1H-imidazol-5-yl)propanoyl] (2S,3S)-2-amino-3-methylpentanoate		HMDB0257734	-2.78317	1.77893e-06	0.145272	1.2782
HMDB0257740	Dimethyl 3,4-dimethoxy-6-phenylbenzene-1,2-dicarboxylate		HMDB0257740	3.29683	1.28685e-17	9.82753	1.74645
HMDB0257764	2-Chloro-N-[[4-[(2-chloroanilino)methyl]cyclohexyl]methyl]aniline		HMDB0257764	2.18472	6.32482e-11	4.54638	1.32426
HMDB0257777	[(2R,3S,4R,5R)-3,4,5,6-Tetrahydroxy-1-oxohexan-2-yl] (2S)-2-aminopropanoate		HMDB0257777	-2.08271	1.54244e-05	0.23607	1.07366
HMDB0257803	1,1,1-Tri(butyryloxy)propane		HMDB0257803	2.3967	1.80055e-08	5.26598	1.51763
HMDB0257806	3-[2-Carboxyprop-1-enyl(ethoxycarbonyl)amino]-2-methylprop-2-enoic acid		HMDB0257806	2.83145	8.68757e-10	7.11792	1.63067
HMDB0257874	2-Methoxy-3-phenylundec-2-enoic acid		HMDB0257874	5.87292	8.11603e-17	58.6035	2.40608
HMDB0257933	(7,8-Dihydro-5-((E)-((a-(3-pyridyl)benzylidene)aminooxy)ethyl)-1-naphthyloxy)acetic acid		HMDB0257933	5.76725	2.29221e-20	54.4646	2.26485
HMDB0257936	10-Methyl-9-(10-methyl-1H-acridin-9-yl)-1H-acridine		HMDB0257936	1.25433	0.000155	2.38556	1.06162
HMDB0257962	N-[(Furan-2-yl)methyl]-2-(N-methyl-2-phenoxyacetamido)benzamide		HMDB0257962	2.4231	1.94557e-12	5.3632	1.4909
HMDB0257968	2-(5-Fluoro-3,7,11-trimethyldodeca-2,6,10-trienyl)sulfanylbenzoic acid		HMDB0257968	-2.30071	5.67306e-06	0.202963	1.18865
HMDB0257998	N-[(2R,3R,4S,6R)-4,6-Dihydroxy-6-methyl-2-[(1R,2R)-1,2,3-trihydroxypropyl]oxan-3-yl]acetamide		HMDB0257998	-2.3049	4.82354e-08	0.202375	1.32648
HMDB0258053	1-(Naphthalen-2-ylmethyl)-1,2,3,4-tetrahydroisoquinoline-6,7-diol		HMDB0258053	-4.37521	2.13713e-07	0.048187	1.69672
HMDB0258054	(3R,4R,5S,6R)-3,4,5,6-Tetrahydroxyoxepan-2-one		HMDB0258054	3.07689	5.86935e-11	8.43795	1.68469
HMDB0258056	4-[(2R)-2-Aminopropyl]imidazole-1-carboxylic acid		HMDB0258056	-2.20272	1.9673e-07	0.217228	1.21937
HMDB0258058	(2S)-2-Amino-3-[4-[(2S)-2-amino-3-(1H-indol-3-yl)propanoyl]oxyphenyl]propanoic acid		HMDB0258058	4.17758	0.0029831	18.0957	1.05635
HMDB0258084	Allyl-isopropyl-acetylharnstoff		HMDB0258084	-3.38372	9.90215e-09	0.0958072	1.54285
HMDB0258096	Adenosine, 8-(butylamino)-N-cyclopentyl-		HMDB0258096	-3.4909	9.68291e-07	0.0889477	1.45401
HMDB0258181	Scopine		HMDB0258181	1.50737	2.24017e-11	2.84292	1.11791
HMDB0258218	Semagacestat		HMDB0258218	-2.20771	1.94726e-05	0.216478	1.12849
HMDB0258231	SENECIPHYLLINE		HMDB0258231	-1.79156	2.27521e-05	0.28886	1.0437
HMDB0258236	senkyunolide I		HMDB0258236	2.20391	6.6148e-07	4.60727	1.21712
HMDB0258274	6-(4-Azanyl-4-Methyl-Piperidin-1-Yl)-3-[2,3-Bis(Chloranyl)phenyl]pyrazin-2-Amine		HMDB0258274	-3.88256	0.00204637	0.0678003	1.04567
[truncated: 241 more rows]
