# Supplementary material for: Akkermansia muciniphila Enhances Resistance to Infectious Bronchitis Virus in Chickens Through γ-Aminobutyric Acid-Mediated Anti-Inflammatory Pathways
Source: Research Square preprint supplement (doi:10.21203/rs.3.rs-6786224/v1), 2025-06-25
Supplement: Supplementary file 9 [file e4ee7d3e327288cfcc526ec0.xlsx]

## Sheet: Sheet1
Table S3. Comparison of predicted microbiota functions between adult and young chicken groups.
Pathway	Adult(%)	Young(%)	p value	FDR
Spliceosome	0.001675	0	0	0
Other types of O-glycan biosynthesis	0	0.000218	0	0
Amino sugar and nucleotide sugar metabolism	1.0376	1.16114	0	0
Vasopressin-regulated water reabsorption	2.4e-05	2e-06	0	0
Tropane, piperidine and pyridine alkaloid biosynthesis	0.440539	0.368482	0	0
Calcium signaling pathway	1e-06	3.9e-05	0	0
NOD-like receptor signaling pathway	0.021692	0.094576	0	0
Starch and sucrose metabolism	0.912417	1.11493	0	0
Alanine, aspartate and glutamate metabolism	1.76903	1.89421	1e-06	1.1e-05
Chlorocyclohexane and chlorobenzene degradation	0.038302	0.084424	1e-06	1.1e-05
Phosphonate and phosphinate metabolism	0.132885	0.18717	1e-06	1.1e-05
Epithelial cell signaling in Helicobacter pylori infection	0.143785	0.172613	1e-06	1.1e-05
Valine, leucine and isoleucine degradation	0.420371	0.339198	1e-06	1.1e-05
RNA transport	0.052068	0.060563	1e-06	1.1e-05
Pentose phosphate pathway	1.66362	1.88716	2e-06	1.9e-05
Insulin signaling pathway	0.093685	0.118763	2e-06	1.9e-05
Glycolysis / Gluconeogenesis	1.09848	1.17516	4e-06	3.6e-05
Galactose metabolism	0.933903	1.12845	5e-06	4.2e-05
Citrate cycle (TCA cycle)	1.0437	0.904955	6e-06	4.8e-05
Carbon fixation pathways in prokaryotes	1.22485	1.1233	7e-06	5.3e-05
Lipopolysaccharide biosynthesis	0.821333	0.30589	1e-05	7.2e-05
Fatty acid degradation	0.330838	0.2961	1.4e-05	9.6e-05
N-Glycan biosynthesis	0.049787	0.027184	1.8e-05	0.000118
Penicillin and cephalosporin biosynthesis	0.026818	0.070882	2e-05	0.000126
Lipoic acid metabolism	0.84782	0.576215	4.2e-05	0.000235
Homologous recombination	1.54469	1.64078	4.2e-05	0.000235
Bacterial secretion system	0.841666	0.922502	4.2e-05	0.000235
Phenylalanine metabolism	0.306508	0.254289	4.7e-05	0.000253
Biotin metabolism	1.44731	1.08296	5.3e-05	0.000276
Cysteine and methionine metabolism	1.36357	1.50621	5.9e-05	0.000297
Mismatch repair	1.71306	1.83107	6.6e-05	0.000321
Nucleotide excision repair	0.789364	0.836704	8.3e-05	0.000392
RNA polymerase	1.2163	1.44787	9.3e-05	0.000426
Pyruvate metabolism	1.24305	1.36122	0.000116	0.000515
Synthesis and degradation of ketone bodies	0.562802	0.399568	0.000129	0.000557
Pyrimidine metabolism	1.20526	1.27049	0.0002	0.000795
Glycerolipid metabolism	0.486734	0.566622	0.0002	0.000795
Pantothenate and CoA biosynthesis	1.96979	1.85657	0.0002	0.000795
Shigellosis	0.000681	0.002512	0.000222	0.00086
Secondary bile acid biosynthesis	0.630121	1.08336	0.000247	0.000888
Fatty acid biosynthesis	1.83495	2.03067	0.000247	0.000888
Primary bile acid biosynthesis	0.070014	0.120375	0.000247	0.000888
Biosynthesis of siderophore group nonribosomal peptides	0.031054	0.01178	0.000305	0.001071
Steroid biosynthesis	0.002176	0.000209	0.000356	0.001222
Bacterial invasion of epithelial cells	0.000769	0.002625	0.000375	0.001258
Nitrogen metabolism	0.566285	0.590155	0.000416	0.001366
Riboflavin metabolism	0.949664	0.894936	0.00046	0.001478
Peroxisome	0.180593	0.136707	0.000563	0.001771
DNA replication	1.24312	1.28686	0.000687	0.002117
Butanoate metabolism	0.750876	0.691224	0.000758	0.002244
Peptidoglycan biosynthesis	2.00299	2.17678	0.000758	0.002244
Drug metabolism - other enzymes	0.574128	0	0.00093	0.00265
Ubiquinone and other terpenoid-quinone biosynthesis	0.283521	0.157288	0.000921	0.00265
D-Glutamine and D-glutamate metabolism	2.25318	2.35629	0.001116	0.003064
Thiamine metabolism	1.64891	1.56231	0.001116	0.003064
D-Alanine metabolism	1.73254	1.82905	0.001349	0.003637
Folate biosynthesis	0.948902	0.747051	0.001481	0.003923
Histidine metabolism	1.38402	1.46699	0.001625	0.004231
Lysine biosynthesis	1.74609	1.85341	0.001782	0.004561
Vibrio cholerae pathogenic cycle	0.193836	0.146903	0.00233	0.005864
mRNA surveillance pathway	3e-06	0	0.002626	0.0065
Basal transcription factors	8e-06	1e-06	0.002763	0.006709
Non-homologous end-joining	0.024154	0.015665	0.002799	0.006709
Toluene degradation	0.22276	0.133697	0.003254	0.007677
African trypanosomiasis	0.004978	0.001879	0.003336	0.00775
Linoleic acid metabolism	0.323338	0.176195	0.004577	0.010472
Carotenoid biosynthesis	0.001741	0.000663	0.004903	0.01105
Chloroalkane and chloroalkene degradation	0.361156	0.117853	0.005741	0.012748
Styrene degradation	0.033093	0.002067	0.006549	0.014332
Benzoate degradation	0.1669	0.187557	0.007113	0.015344
Inositol phosphate metabolism	0.171532	0.154246	0.008355	0.017769
Base excision repair	0.92986	0.960606	0.009786	0.020242
Pentose and glucuronate interconversions	0.614184	0.697642	0.009786	0.020242
Biosynthesis of ansamycins	5.25534	5.8611	0.010581	0.021591
beta-Alanine metabolism	0.429893	0.346079	0.011417	0.022986
Phosphotransferase system (PTS)	0.279601	0.387632	0.013321	0.026467
Fructose and mannose metabolism	0.902282	0.984443	0.015479	0.030355
Glycerophospholipid metabolism	0.563581	0.589707	0.016669	0.032269
Photosynthesis	0.402694	0.142116	0.019179	0.036414
Phenylalanine, tyrosine and tryptophan biosynthesis	1.33295	1.28482	0.019292	0.036414
Ribosome biogenesis in eukaryotes	0.056409	0.057742	0.019996	0.037276
Selenocompound metabolism	1.04888	1.01121	0.031517	0.058037
Terpenoid backbone biosynthesis	1.39236	1.43104	0.033718	0.061342
Tyrosine metabolism	0.251491	0.240504	0.038515	0.069235
Sphingolipid metabolism	0.273925	0.339608	0.04388	0.077045
Nicotinate and nicotinamide metabolism	1.12855	1.10526	0.046792	0.081214
Apoptosis	0.024635	0.011035	0.049864	0.085562
Glycine, serine and threonine metabolism	1.19806	1.17191	0.053103	0.090096
Biosynthesis of unsaturated fatty acids	0.39892	0.418642	0.056517	0.093781
C5-Branched dibasic acid metabolism	1.92274	1.81629	0.056517	0.093781
Nitrotoluene degradation	0.439653	0.330122	0.063892	0.104866
Carbon fixation in photosynthetic organisms	1.60238	1.62043	0.072045	0.115732
RNA degradation	0.619223	0.629156	0.072045	0.115732
Streptomycin biosynthesis	1.60131	1.66492	0.081032	0.126143
Parkinson's disease	0	0.000448	0.080631	0.126143
Ribosome	1.71229	1.73736	0.081032	0.126143
Dioxin degradation	0.089742	0.052509	0.084382	0.130017
Cell cycle - Caulobacter	1.56652	1.58713	0.090907	0.138656
Sulfur metabolism	0.756941	0.792337	0.107511	0.162342
Geraniol degradation	0.080558	0.046386	0.110332	0.164952
Bacterial chemotaxis	1.66506	1.46235	0.119856	0.174022
Flagellar assembly	1.17842	1.03754	0.119856	0.174022
Glutathione metabolism	0.345174	0.333299	0.119856	0.174022
Flavonoid biosynthesis	0.003777	0.002328	0.133283	0.191674
Betalain biosynthesis	2e-06	0	0.162587	0.22255
Valine, leucine and isoleucine biosynthesis	2.54075	2.48028	0.163596	0.22255
Polyketide sugar unit biosynthesis	0.05008	0	0.162587	0.22255
Vibrio cholerae infection	1e-06	0	0.162587	0.22255
Methane metabolism	0.559273	0.571335	0.17191	0.225752
Steroid hormone biosynthesis	0.015112	0.023374	0.17193	0.225752
D-Arginine and D-ornithine metabolism	0.120079	0.112192	0.17193	0.225752
Biosynthesis of vancomycin group antibiotics	2.02519	2.1049	0.17193	0.225752
Aminobenzoate degradation	0.099601	0.087849	0.189544	0.246734
Porphyrin and chlorophyll metabolism	0.83088	0.808562	0.218406	0.277137
Purine metabolism	0.890339	0.898319	0.218406	0.277137
Aminoacyl-tRNA biosynthesis	1.79099	1.81611	0.218406	0.277137
ABC transporters	0.730237	0.780361	0.228694	0.287773
Tryptophan metabolism	0.174763	0.168201	0.261616	0.326479
Lysine degradation	0.17048	0.17477	0.273285	0.338246
Naphthalene degradation	0.029134	0.009998	0.29879	0.366807
Two-component system	0.406355	0.39055	0.364842	0.437231
Staphylococcus aureus infection	0.008562	0.006068	0.364842	0.437231
Vitamin B6 metabolism	1.03562	1.04492	0.394171	0.46866
Taurine and hypotaurine metabolism	0.603924	0.585036	0.424883	0.497344
Ascorbate and aldarate metabolism	0.200029	0.198167	0.424883	0.497344
Caprolactam degradation	0.003426	0.003059	0.456951	0.522724
Protein export	1.56144	1.57018	0.456951	0.522724
One carbon pool by folate	1.82879	1.82273	0.456951	0.522724
Glycosaminoglycan degradation	0.342925	0.423446	0.473481	0.537561
Arginine and proline metabolism	0.773968	0.78059	0.490334	0.552541
Proteasome	9e-06	0.000105	0.523208	0.585218
Other glycan degradation	0.891213	0.882404	0.560852	0.622711
Limonene and pinene degradation	0.010303	0.020076	0.58827	0.648385
Xylene degradation	0.009153	0.009181	0.614695	0.672601
Glyoxylate and dicarboxylate metabolism	0.702849	0.709309	0.675014	0.733289
Protein digestion and absorption	0.028569	0.019983	0.71498	0.765688
Sulfur relay system	1.16061	1.16447	0.71498	0.765688
Protein processing in endoplasmic reticulum	0.061041	0.060647	0.735268	0.781869
Atrazine degradation	0.003491	0.002998	0.745471	0.787176
Amoebiasis	0.008671	0.009008	0.860431	0.902258
Fluorobenzoate degradation	0.000375	0.001063	0.880646	0.917087
Biosynthesis of type II polyketide products	9e-06	8e-06	0.886851	0.917223
Meiosis - yeast	0.001558	0.000127	0.916228	0.941159
Zeatin biosynthesis	0.662569	0.625986	0.946084	0.958783
Plant-pathogen interaction	0.232759	0.235383	0.946084	0.958783
Propanoate metabolism	0.758977	0.756666	0.989209	0.989209
Oxidative phosphorylation	0.475079	0.482096	0.989209	0.989209
