# Supplementary material for: Akkermansia muciniphila Enhances Resistance to Infectious Bronchitis Virus in Chickens Through γ-Aminobutyric Acid-Mediated Anti-Inflammatory Pathways
Source: Research Square preprint supplement (doi:10.21203/rs.3.rs-6786224/v1), 2025-06-25
Supplement: Supplementary file 10 [file e79ff475eb1070b13691aca0.xlsx]

## Sheet: Sheet1
Table S9. KEGG pathway analysis of differentially expressed metabolites between adult and young chicken groups.
Pathway ID	Pathway	Count	Count All	Pvalue	KEGG Names	KEGG IDs
map04080	Neuroactive ligand-receptor interaction	8	53	3.7e-06	gamma-Aminobutyric acid;p-Octopamine;Tryptamine;MG(0:0/20:4(5Z,8Z,11Z,14Z)/0:0);Progesterone;Morphine;Prostaglandin E2;N-Oleoyl dopamine	C00334+C04227+C00398+C13856+C00410+C01516+C00584+C12272
map02010	ABC transporters	12	138	4.87e-06	L-Serine;L-Phenylalanine;Mannitol;Ornithine;Biotin;L-Lysine;2'-Deoxyguanosine;Sorbitol;4-Hydroxyproline;Malonylcarnitine;Oleandomycin;Mannopine;	C00065+C00079+C00392+C00077+C00120+C00047+C00330+C00794+C01157+C01606+C01946+C16692
map00380	Tryptophan metabolism	8	83	8.92e-06	L-Tryptophan;Tryptamine;Tryptophol;6-Hydroxymelatonin;12-hydroxystearic acid;L-Kynurenine;Oxoadipic acid;2-Amino-3-methoxybenzoic acid	C00078+C00398+C00955+C05643+C05660+C00328+C00322+C05831
map00360	Phenylalanine metabolism	6	49	4.87e-05	L-Phenylalanine;3-(2-Hydroxyphenyl)propanoic acid;Hydrocinnamic acid;2-Hydroxyphenylacetic acid;N-Phenylacetylglutamine;2-Hydroxycinnamic acid	C00079+C01198+C05629+C05852+C04148+C01772
map00470	D-Amino acid metabolism	7	69	6.39e-05	L-Serine;L-Phenylalanine;Ornithine;L-Lysine;4-Hydroxyproline;D-Alanyl-D-alanine;D-(-)-Glutamine	C00065+C00079+C00077+C00047+C01157+C00993+C00819
map00140	Steroid hormone biosynthesis	8	99	6.39e-05	Allopregnanolone;Progesterone;17alpha-Hydroxypregnenolone;5alpha-Dihydrotestosterone;Pregnenolone;Androsterone;16alpha-Hydroxydehydroepiandrosterone;18-Hydroxycorticosterone	C13712+C00410+C05138+C03917+C01953+C00523+C05139+C01124
map01230	Biosynthesis of amino acids	9	128	7.01e-05	L-Serine;L-Tryptophan;L-Phenylalanine;Ornithine;L-Lysine;4-Hydroxyphenylpyruvic acid;Oxoadipic acid;L-Arogenate; L-Arogenic acid; Pretyrosine;;N-Succinyl-LL-2,6-diaminoheptanedioate; N-Succinyl-LL-2,6-diaminopimelate; N-Succinyl-L-2,6-diaminoheptanedioate; N-Succinyl-L-2,6-diaminopimelate;	C00065+C00078+C00079+C00077+C00047+C01179+C00322+C00826+C04421
map00330	Arginine and proline metabolism	6	69	0.00059	Creatine;gamma-Aminobutyric acid;Ornithine;10Z-Nonadecenoic acid;4-Guanidinobutyric acid;4-Hydroxyproline	C00300+C00334+C00077+C00750+C01035+C01157
map00780	Biotin metabolism	4	29	0.00242804	Pimelic acid;Biotin;L-Lysine;Biocytin; N6-D-Biotinyl-L-lysine; epsilon-N-Biotinyl-L-lysine;	C02656+C00120+C00047+C05552
map00970	Aminoacyl-tRNA biosynthesis	5	52	0.00350881	L-Serine;L-Tryptophan;L-Phenylalanine;L-Lysine;L-Pyrrolysine; Pyrrolysine;	C00065+C00078+C00079+C00047+C16138
map01210	2-Oxocarboxylic acid metabolism	8	134	0.00526108	L-Tryptophan;L-Phenylalanine;L-Tyrosine;Ornithine;L-Lysine;4-Hydroxyphenylpyruvic acid;2-(4'-Methylthio)butylmalic acid; 2-(4'-Methylthio)butylmalate;;2-(5'-Methylthio)pentylmalic acid; 2-(5'-Methylthio)pentylmalate;	C00078+C00079+C00082+C00077+C00047+C01179+C17218+C17222
map01240	Biosynthesis of cofactors	14	328	0.00602519	L-Serine;Orotic acid;L-Tryptophan;L-Tyrosine;Pimelic acid;Biotin;4-Hydroxyphenylpyruvic acid;10Z-Nonadecenoic acid;L-Kynurenine;Porphobilinogen;4-Phospho-D-erythronate; 4-Phosphoerythronate;;Coenzyme M; 2-Mercaptoethanesulfonate; Reduced coenzyme M; HS-CoM; CoM;;L-3,4-Dihydroxybutan-2-one 4-phosphate; 1-Deoxy-L-glycero-tetrulose 4-phosphate; 2-Hydroxy-3-oxobutyl phosphate;;3-[(1-Carboxyvinyl)oxy]…	C00065+C00295+C00078+C00082+C02656+C00120+C01179+C00750+C00328+C00931+C03393+C03576+C15556+C20772
map00270	Cysteine and methionine metabolism	5	67	0.0104943	L-Serine;5'-Methylthioadenosine;O-Acetylserine;Nicotianamine;Ophthalmic acid	C00065+C00170+C00979+C05324+C21016
map00350	Tyrosine metabolism	5	78	0.0192634	L-Tyrosine;4-Hydroxyphenylpyruvic acid;3,4-Dihydroxyphenylglycol;Homovanillic acid;3-(3,4-Dihydroxyphenyl)pyruvate; 3,4-Dihydroxyphenylpyruvate;	C00082+C01179+C05576+C05582+C04045
map00920	Sulfur metabolism	3	33	0.02709	L-Serine;O-Acetylserine;2-(Methylthio)ethanesulfonate; Methylcoenzyme M; Methyl-CoM; 2-(Methylsulfanyl)ethane-1-sulfonate;	C00065+C00979+C03920
map00130	Ubiquinone and other terpenoid-quinone biosynthesis	4	71	0.0522242	L-Tyrosine;4-Hydroxyphenylpyruvic acid;alpha-Tocotrienol;3-[(1-Carboxyvinyl)oxy]benzoate; 3-[(1-Carboxyethenyl)oxy]benzoic acid;	C00082+C01179+C14153+C20772
map00052	Galactose metabolism	3	46	0.0625886	Sorbitol;Galactitol;Melibiitol; 6-O-alpha-D-Galactosyl-D-glucitol;	C00794+C01697+C05399
map00340	Histidine metabolism	3	47	0.0659146	L-Histidine;Methylimidazoleacetic acid;Anserine	C00135+C05828+C01262
map00260	Glycine, serine and threonine metabolism	3	48	0.0693199	L-Serine;L-Tryptophan;Creatine	C00065+C00078+C00300
map00232	Caffeine metabolism	2	22	0.0696258	1-Methylxanthine;7-Methylxanthosine;	C16358+C16352
map01200	Carbon metabolism	5	114	0.0762433	L-Serine;Gluconic acid;O-Acetylserine;Coenzyme M; 2-Mercaptoethanesulfonate; Reduced coenzyme M; HS-CoM; CoM;;2-(Methylthio)ethanesulfonate; Methylcoenzyme M; Methyl-CoM; 2-(Methylsulfanyl)ethane-1-sulfonate;	C00065+C00257+C00979+C03576+C03920
map04114	Oocyte meiosis	1	4	0.0768802	Progesterone	C00410
map04914	Progesterone-mediated oocyte maturation	1	4	0.0768802	Progesterone	C00410
map04210	Apoptosis	1	4	0.0768802	Sphingosine	C00319
map00740	Riboflavin metabolism	2	24	0.0810927	L-3,4-Dihydroxybutan-2-one 4-phosphate; 1-Deoxy-L-glycero-tetrulose 4-phosphate; 2-Hydroxy-3-oxobutyl phosphate;;2-Amino-5-formylamino-6-(5-phospho-D-ribosylamino)pyrimidin-4(3H)-one;	C15556+C15563
map00982	Drug metabolism - cytochrome P450	4	87	0.0941811	Morphine;Lidocaine;10,11-Dihydro-10,11-dihydroxycarbamazepine;10-Hydroxycarbazepine	C01516+C07073+C07495+C07493
map00600	Sphingolipid metabolism	2	27	0.0992717	L-Serine;Sphingosine	C00065+C00319
map00250	Alanine, aspartate and glutamate metabolism	2	28	0.105563	gamma-Aminobutyric acid;N-Acetyl-L-aspartic acid	C00334+C01042
map04916	Melanogenesis	1	6	0.11308	L-Tyrosine	C00082
map00240	Pyrimidine metabolism	3	64	0.133424	Cytosine;Orotic acid;Thymidine 5'-monophosphate	C00380+C00295+C00364
map00860	Porphyrin metabolism	5	148	0.170686	Stercobilinogen;Stercobilin;Porphobilinogen;Red chlorophyll catabolite;;3-Hydroxyethylchlorophyllide a; 3-Devinyl-3-(1-hydroxyethyl)chlorophyllide a;	C05789+C05793+C00931+C18022+C18154
map00480	Glutathione metabolism	2	38	0.173201	Ornithine;10Z-Nonadecenoic acid	C00077+C00750
map01040	Biosynthesis of unsaturated fatty acids	3	74	0.180836	Dihomo-alpha-linolenic acid;Adrenic acid;Stearic acid	C16522+C16527+C01530
map04217	Necroptosis	1	10	0.181288	Sphingosine	C00319
map04122	Sulfur relay system	1	11	0.197506	O-Acetylserine	C00979
map04625	C-type lectin receptor signaling pathway	1	11	0.197506	Prostaglandin E2	C00584
map00120	Primary bile acid biosynthesis	2	47	0.238402	Cholic acid;Taurocholic acid	C00695+C05122
map00310	Lysine degradation	2	51	0.267844	Pipecolic acid;L-Lysine	C00408+C00047
map00051	Fructose and mannose metabolism	2	55	0.297271	Mannitol;Sorbitol	C00392+C00794
map00564	Glycerophospholipid metabolism	2	56	0.304605	L-Serine;LysoPC(16:0/0:0)	C00065+C04230
map00061	Fatty acid biosynthesis	2	58	0.319228	Palmitoleic acid;Stearic acid	C08362+C01530
map01232	Nucleotide metabolism	2	58	0.319228	Cytosine;Thymidine 5'-monophosphate	C00380+C00364
map00220	Arginine biosynthesis	1	23	0.368849	Ornithine	C00077
map00430	Taurine and hypotaurine metabolism	1	24	0.38136	Taurocholic acid	C05122
map00565	Ether lipid metabolism	1	25	0.393624	LysoPC(O-18:0/0:0)	C04317
map00980	Metabolism of xenobiotics by cytochrome P450	3	121	0.430505	(1R,2R)-3-[(1,2-Dihydro-2-hydroxy-1-naphthalenyl)thio]-2-oxopropanoic acid;;S-(2-Hydroxyethyl)-N-acetyl-L-cysteine;;alpha-[3-(Nitrosoamino)propyl]-3-pyridinemethanol;	C14799+C14876+C19581
map04216	Ferroptosis	1	29	0.440302	Adrenic acid	C16527
map00750	Vitamin B6 metabolism	1	29	0.440302	4-Phospho-D-erythronate; 4-Phosphoerythronate;	C03393
map00770	Pantothenate and CoA biosynthesis	1	30	0.4514	10Z-Nonadecenoic acid	C00750
map00730	Thiamine metabolism	1	31	0.462279	L-Tyrosine	C00082
map00590	Arachidonic acid metabolism	2	79	0.465617	Prostaglandin E2;Thromboxane B2	C00584+C05963
map00030	Pentose phosphate pathway	1	36	0.513529	Gluconic acid	C00257
map00650	Butanoate metabolism	1	47	0.609773	gamma-Aminobutyric acid	C00334
map00071	Fatty acid degradation	1	50	0.632552	Palmitoylcarnitine	C02990
map00760	Nicotinate and nicotinamide metabolism	1	55	0.667607	gamma-Aminobutyric acid	C00334
map00053	Ascorbate and aldarate metabolism	1	57	0.680676	3-Dehydro-L-gulonate 6-phosphate;	C14899
map00040	Pentose and glucuronate interconversions	1	58	0.687017	3-Dehydro-L-gulonate 6-phosphate;	C14899
map00630	Glyoxylate and dicarboxylate metabolism	1	64	0.722512	L-Serine	C00065
map01212	Fatty acid metabolism	1	122	0.913494	Palmitoylcarnitine	C02990
