# Supplementary material for: Akkermansia muciniphila Enhances Resistance to Infectious Bronchitis Virus in Chickens Through γ-Aminobutyric Acid-Mediated Anti-Inflammatory Pathways
Source: Research Square preprint supplement (doi:10.21203/rs.3.rs-6786224/v1), 2025-06-25
Supplement: Supplementary file 12 [file f9e07a4d901046dbda2dca84.xlsx]

## Sheet: Sheet1
Table S1. Genotypes of infectious bronchitis virus (IBV) isolates collected by our research team from 2019 to 2024.
Genotype	2019	2020	2021	2022	2023	2024	Total	Percentage
GI-19 (QX-like)	21	23	12	36	28	16	136	53.13
GI-13 (4/93)	7	3	2	7	4	3	26	10.16
GI-7 (TW)	11	9	10	5	7	6	48	18.75
GI-22 (SAIBK)	2	2		3	4	4	15	5.86
GI-1 (Mass-type)	2	1	5	2	1	1	12	4.69
GVI-1	3	2	3	3	3	5	19	7.42
GVII-2	0	0	0	0	2	0	2	0.78
Variants	0	1	1	0	1	2	5	1.95
Total	46	40	32	56	47	35	256	100
